# Supplementary material for: Organocatalytic enantioselective SN1-type dehydrative nucleophilic substitution: access to bis(indolyl)methanes bearing quaternary carbon stereocenters
Source: Royal Society of Chemistry journal article supplement (doi:10.1039/d1sc05174a), 2021-11-23
Supplement: d1sc05174a1.pdf [file d1sc05174a1.pdf]

## Supporting Information

### **Organocatalytic enantioselective S<sub>N</sub>1-type dehydrative nucleophilic substitution: access to bis(indolyl)methanes bearing quaternary carbon stereocenters**

Wen-Run Zhu,<sup>‡</sup> Qiong Su,<sup>‡</sup> Xiao-Yi Deng, Jia-Sheng Liu, Tao Zhong, Shan-Shui Meng, Ji-Tao Yi, Jiang Weng\* and Gui Lu\*

<sup>a</sup> Guangdong Provincial Key Laboratory of Chiral Molecule and Drug Discovery, School of Pharmaceutical Sciences, Sun Yat-sen University, Guangzhou, 510006, P. R. China. E-mail: wengj2@mail.sysu.edu.cn, lugui@mail.sysu.edu.cn

<sup>‡</sup> These authors contributed equally: Wen-Run Zhu, Qiong Su.

## Table of Contents

|                                                                                  |             |
|----------------------------------------------------------------------------------|-------------|
| <b>1. General Information</b>                                                    | <b>S3</b>   |
| <b>2. Screening of Catalysts and Condition Optimization</b>                      | <b>S3</b>   |
| <b>3. Experimental Procedure and Characterization of Substrates</b>              | <b>S7</b>   |
| <b>4. Experimental Procedure and Characterization of Products</b>                | <b>S18</b>  |
| <b>5. Experimental Procedure and Characterization Data of Compounds<br/>9~18</b> | <b>S52</b>  |
| <b>6. Data for X-Ray Crystal Structures of 5i, 14 and 18</b>                     | <b>S60</b>  |
| <b>7. Mechanistic Experiments</b>                                                | <b>S63</b>  |
| <b>8. Copies of NMR Spectra</b>                                                  | <b>S69</b>  |
| <b>9. Copies of HPLC Spectra</b>                                                 | <b>S262</b> |

## 1. General Information

All reactions were carried out in oven-dried reaction vessel unless otherwise noted and solvents were dried according to established procedures. Reactions were monitored by thin layer chromatography (TLC). Purification of reaction product was carried out by flash chromatography using Qing Dao Sea Chemical Reagent silica gel (200-300 mesh).  $^1\text{H}$ ,  $^{13}\text{C}$  and  $^{19}\text{F}$  NMR spectra were recorded on Bruker 400 MHz or 500 MHz spectrometer in  $\text{CDCl}_3$  unless otherwise noted. Chemical shifts in  $^1\text{H}$  NMR spectra are reported in parts per million (ppm,  $\delta$ ) downfield from the internal standard  $\text{Me}_4\text{Si}$  (TMS,  $\delta = 0$  ppm). Chemical shifts in  $^{13}\text{C}$  NMR spectra are reported relative to the central line of the chloroform signal ( $\delta = 77.0$  ppm). Data are presented as follows: chemical shift, integration, multiplicity (s = singlet, d = doublet, t = triplet, q = quartet, m = multiplet) and coupling constant in Hertz (Hz). Infrared spectra (IR) were recorded from  $4500\text{ cm}^{-1}$  to  $650\text{ cm}^{-1}$  on a PerkinElmer Spectrum BX-59343. For detection, a Smiths Detection DuraSampl $^{\text{R}}$  II Diamond ATR sensor was used and the absorption bands were reported in wavenumbers. HPLC analyses were conducted on an Agilent instrument using Daicel Chiralpak IA, IB, Chiralcel AD-H, OD-H or AS-H columns. High resolution mass spectra were obtained with a Shimadzu LCMS-IT-TOF mass spectrometer. The single crystal X-ray diffraction studies were carried out on an Xcalibur Onyx Nova diffractometer equipped with  $\text{CuK}\alpha$  radiation.

## 2. Screening of Catalysts and Condition Optimization

### 2.1 Condition optimization for the synthesis of **3a** from propargylic alcohol **1a** and 3-methyl-1*H*-indole.

**Table S1.** Screening of catalysts and optimization of reaction conditions<sup>[a]</sup>

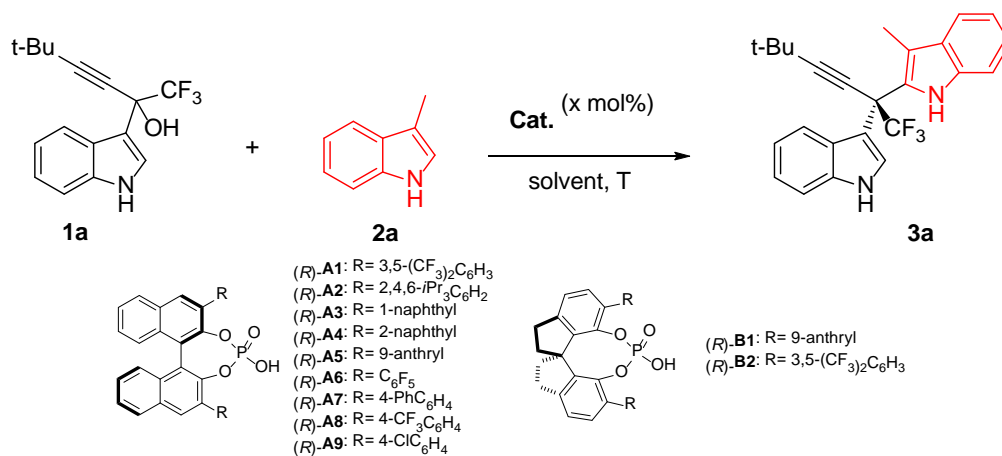

| Entry | Catalyst (x mol%)            | Solvent (x mL) | <b>1a</b> : <b>2a</b> | T (°C) | Additive (x mg) | Time | Yield <sup>[b]</sup> (%) | $e^{\text{r}}$ <sup>[c]</sup> |
|-------|------------------------------|----------------|-----------------------|--------|-----------------|------|--------------------------|-------------------------------|
| 1     | ( <i>R</i> )- <b>A1</b> (10) | DCM (1)        | 1:1.2                 | rt     | --              | 20h  | 90                       | 64:36                         |
| 2     | ( <i>R</i> )- <b>A2</b> (10) | DCM (1)        | 1:1.2                 | rt     | --              | 72h  | trace                    | --                            |
| 3     | ( <i>R</i> )- <b>A3</b> (10) | DCM (1)        | 1:1.2                 | rt     | --              | 20h  | 90                       | 56:44                         |
| 4     | ( <i>R</i> )- <b>A4</b> (10) | DCM (1)        | 1:1.2                 | rt     | --              | 20h  | 88                       | 61:39                         |
| 5     | ( <i>R</i> )- <b>A5</b> (10) | DCM (1)        | 1:1.2                 | rt     | --              | 72h  | trace                    | --                            |
| 6     | ( <i>R</i> )- <b>A6</b> (10) | DCM (1)        | 1:1.2                 | rt     | --              | 20h  | 90                       | 91:9                          |
| 7     | ( <i>R</i> )- <b>A7</b> (10) | DCM (1)        | 1:1.2                 | rt     | --              | 20h  | 68                       | 53:47                         |
| 8     | ( <i>R</i> )- <b>A8</b> (10) | DCM (1)        | 1:1.2                 | rt     | --              | 20h  | 65                       | 65:35                         |
| 9     | ( <i>R</i> )- <b>A9</b> (10) | DCM (1)        | 1:1.2                 | rt     | --              | 20h  | 53                       | 64:36                         |
| 10    | ( <i>R</i> )- <b>B1</b> (10) | DCM (1)        | 1:1.2                 | rt     | --              | 72h  | trace                    | --                            |
| 11    | ( <i>R</i> )- <b>B2</b> (10) | DCM (1)        | 1:1.2                 | rt     | --              | 72h  | trace                    | --                            |
| 12    | ( <i>R</i> )- <b>A6</b> (5)  | DCM (1)        | 1:1.2                 | rt     | --              | 20h  | 90                       | 91:9                          |

|           |                               |                       |            |             |                                      |           |           |             |
|-----------|-------------------------------|-----------------------|------------|-------------|--------------------------------------|-----------|-----------|-------------|
| 13        | ( <i>R</i> )- <b>A6</b> (2.5) | DCM (1)               | 1:1.2      | rt          | --                                   | 36h       | 89        | 86:14       |
| 14        | ( <i>R</i> )- <b>A6</b> (5)   | DCE (1)               | 1:1.2      | rt          | --                                   | 20h       | 88        | 85:15       |
| 15        | ( <i>R</i> )- <b>A6</b> (5)   | CHCl <sub>3</sub> (1) | 1:1.2      | rt          | --                                   | 20h       | 90        | 67:33       |
| 16        | ( <i>R</i> )- <b>A6</b> (5)   | CCl <sub>4</sub> (1)  | 1:1.2      | rt          | --                                   | 20h       | 86        | 76:24       |
| 17        | ( <i>R</i> )- <b>A6</b> (5)   | toluene (1)           | 1:1.2      | rt          | --                                   | 8h        | 92        | 79:21       |
| 18        | ( <i>R</i> )- <b>A6</b> (5)   | MeCN (1)              | 1:1.2      | rt          | --                                   | 72h       | <5        | --          |
| 19        | ( <i>R</i> )- <b>A6</b> (5)   | acetone (1)           | 1:1.2      | rt          | --                                   | 72h       | <5        | --          |
| 20        | ( <i>R</i> )- <b>A6</b> (5)   | THF (1)               | 1:1.2      | rt          | --                                   | 72h       | NR        | --          |
| 21        | ( <i>R</i> )- <b>A6</b> (5)   | DCM (3)               | 1:1.2      | rt          | --                                   | 24h       | 90        | 93:7        |
| 22        | ( <i>R</i> )- <b>A6</b> (5)   | DCM (5)               | 1:1.2      | rt          | --                                   | 30h       | 87        | 92:8        |
| 23        | ( <i>R</i> )- <b>A6</b> (5)   | DCM (3)               | 1:1.2      | rt          | Na <sub>2</sub> SO <sub>4</sub> (35) | 20h       | 89        | 89:11       |
| 24        | ( <i>R</i> )- <b>A6</b> (5)   | DCM (3)               | 1:1.2      | rt          | MgSO <sub>4</sub> (35)               | 20h       | 90        | 94:6        |
| 25        | ( <i>R</i> )- <b>A6</b> (5)   | DCM (3)               | 1:1.2      | rt          | 4Å MS (35)                           | 72h       | <5        | --          |
| 26        | ( <i>R</i> )- <b>A6</b> (5)   | DCM (3)               | 1:1.2      | 20°C        | MgSO <sub>4</sub> (35)               | 48h       | 90        | 95:5        |
| 27        | ( <i>R</i> )- <b>A6</b> (5)   | DCM (3)               | 1:1.2      | 15°C        | MgSO <sub>4</sub> (35)               | 72h       | 91        | 95:5        |
| 28        | ( <i>R</i> )- <b>A6</b> (5)   | DCM (3)               | 1:1.2      | 10°C        | MgSO <sub>4</sub> (35)               | 5d        | 92        | 95:5        |
| 29        | ( <i>R</i> )- <b>A6</b> (5)   | DCM (3)               | 1.2:1      | 10°C        | MgSO <sub>4</sub> (35)               | 5d        | 92        | 94:6        |
| <b>30</b> | <b>(<i>R</i>)-A6 (5)</b>      | <b>DCM (3)</b>        | <b>1:1</b> | <b>10°C</b> | <b>MgSO<sub>4</sub> (35)</b>         | <b>5d</b> | <b>92</b> | <b>96:4</b> |

[a] Unless otherwise specified, all reactions were carried out with catalyst (x mol%), **1a** (0.05 mmol) and **2a** (0.06 mmol) in the indicated solvent (x mL) at room temperature. [b] Isolated yield of **3a**. [c] Determined by chiral-phase HPLC analysis.

## 2.2 Condition optimization for the synthesis of **3t** from propargylic alcohol **1k** and 5-methoxy-3-methyl-1*H*-indole.

**Table S2.** Screening of catalysts and optimization of reaction conditions<sup>[a]</sup>

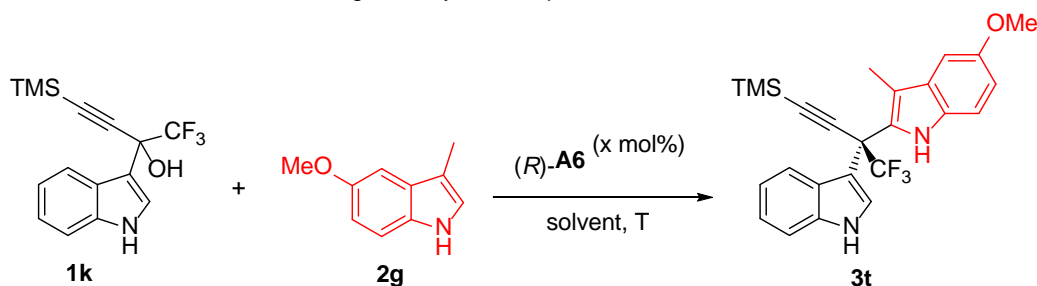

| Entry    | Catalyst (x mol%)            | Solvent (x mL) | <b>1k</b> : <b>2g</b> | Temperature (°C) | Additive (x mg)              | Time       | Yield <sup>[b]</sup> (%) | <i>e<sub>r</sub></i> <sup>[c]</sup> |
|----------|------------------------------|----------------|-----------------------|------------------|------------------------------|------------|--------------------------|-------------------------------------|
| 1        | ( <i>R</i> )- <b>A6</b> (5)  | DCM (3)        | 1:1                   | 10°C             | MgSO <sub>4</sub> (35)       | 6d         | 76                       | 94:6                                |
| 2        | ( <i>R</i> )- <b>A6</b> (5)  | DCM (1)        | 1:1.2                 | 10°C             | MgSO <sub>4</sub> (25)       | 6d         | 78                       | 94:6                                |
| 3        | ( <i>R</i> )- <b>A6</b> (5)  | DCM (1)        | 1:1.2                 | rt               | MgSO <sub>4</sub> (25)       | 48h        | 82                       | 93.5:6.5                            |
| <b>4</b> | <b>(<i>R</i>)-A6 (10)</b>    | <b>DCM (1)</b> | <b>1:1.2</b>          | <b>rt</b>        | <b>MgSO<sub>4</sub> (25)</b> | <b>18h</b> | <b>86</b>                | <b>95:5</b>                         |
| 5        | ( <i>R</i> )- <b>A6</b> (10) | DCM (3)        | 1:1.2                 | rt               | MgSO <sub>4</sub> (35)       | 56h        | 88                       | 95:5                                |

[a] Unless otherwise specified, all reactions were carried out with catalyst (x mol%), **1k** (0.05 mmol) and **2g** (0.06 mmol) in DCM (x mL) at room temperature. [b] Isolated yield of **3t**. [c] Determined by chiral-phase HPLC analysis.

## 2.3 Condition optimization for the synthesis of **5** from propargylic alcohol **1** and 5-fluoro-3-methyl-1*H*-indole.



**Table S3.** Screening of catalysts and optimization of reaction conditions<sup>[a]</sup>

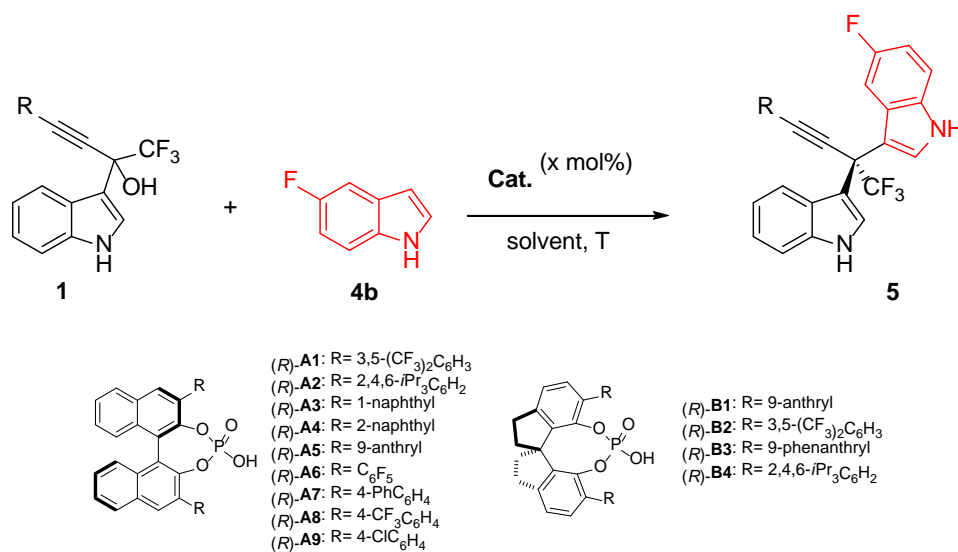

| Entry     | Catalyst (x mol%)            | Solvent (x mL)        | R=                 | Temperature (°C) | Additive (x mg)                      | Time       | Yield <sup>[b]</sup> (%) | <i>e</i> <sub>r</sub> <sup>[c]</sup> |
|-----------|------------------------------|-----------------------|--------------------|------------------|--------------------------------------|------------|--------------------------|--------------------------------------|
| 1         | ( <i>R</i> )- <b>A1</b> (10) | DCM (1)               | Ph                 | rt               | --                                   | 18h        | 96                       | 35:65                                |
| 2         | ( <i>R</i> )- <b>A2</b> (10) | DCM (1)               | Ph                 | rt               | --                                   | 72h        | 82                       | 30:70                                |
| 3         | ( <i>R</i> )- <b>A3</b> (10) | DCM (1)               | Ph                 | rt               | --                                   | 12h        | 98                       | 30:70                                |
| 4         | ( <i>R</i> )- <b>A4</b> (10) | DCM (1)               | Ph                 | rt               | --                                   | 12h        | 96                       | 29:71                                |
| 5         | ( <i>R</i> )- <b>A5</b> (10) | DCM (1)               | Ph                 | rt               | --                                   | 24h        | 96                       | 31:69                                |
| 6         | ( <i>R</i> )- <b>A6</b> (10) | DCM (1)               | Ph                 | rt               | --                                   | 8h         | 98                       | 52:48                                |
| 7         | ( <i>R</i> )- <b>A7</b> (10) | DCM (1)               | Ph                 | rt               | --                                   | 12h        | 93                       | 29:71                                |
| 8         | ( <i>R</i> )- <b>A8</b> (10) | DCM (1)               | Ph                 | rt               | --                                   | 12h        | 95                       | 28:72                                |
| 9         | ( <i>R</i> )- <b>A9</b> (10) | DCM (1)               | Ph                 | rt               | --                                   | 10h        | 92                       | 35:65                                |
| 10        | ( <i>R</i> )- <b>B1</b> (10) | DCM (1)               | Ph                 | rt               | --                                   | 24h        | 98                       | 82:18                                |
| 11        | ( <i>R</i> )- <b>B2</b> (10) | DCM (1)               | Ph                 | rt               | --                                   | 20h        | 96                       | 76:24                                |
| 12        | ( <i>R</i> )- <b>B3</b> (10) | DCM (1)               | Ph                 | rt               | --                                   | 32h        | 92                       | 80:20                                |
| 13        | ( <i>R</i> )- <b>B4</b> (10) | DCM (1)               | Ph                 | rt               | --                                   | 72h        | 68                       | 74:26                                |
| <b>14</b> | <b>(<i>R</i>)-B1 (5)</b>     | <b>DCM (1)</b>        | <b>Ph</b>          | <b>rt</b>        | <b>--</b>                            | <b>72h</b> | <b>96</b>                | <b>90:10</b>                         |
| 15        | ( <i>R</i> )- <b>B1</b> (5)  | CHCl <sub>3</sub> (1) | Ph                 | rt               | --                                   | 8d         | 80                       | 88:12                                |
| 16        | ( <i>R</i> )- <b>B1</b> (5)  | DCE (1)               | Ph                 | rt               | --                                   | 9d         | 86                       | 89:11                                |
| 17        | ( <i>R</i> )- <b>B1</b> (5)  | toluene (1)           | Ph                 | rt               | --                                   | 5d         | 92                       | 80:20                                |
| 18        | ( <i>R</i> )- <b>B1</b> (5)  | PhCF <sub>3</sub> (1) | Ph                 | rt               | --                                   | 24h        | 98                       | 83:17                                |
| 19        | ( <i>R</i> )- <b>B1</b> (5)  | acetone (1)           | Ph                 | rt               | --                                   | 9d         | <5                       | --                                   |
| 20        | ( <i>R</i> )- <b>B1</b> (5)  | EtOAc (1)             | Ph                 | rt               | --                                   | 9d         | <5                       | --                                   |
| 21        | ( <i>R</i> )- <b>B1</b> (5)  | DCM (1)               | <i>t</i> -Bu       | rt               | --                                   | 6d         | 90                       | 92:8                                 |
| 22        | ( <i>R</i> )- <b>B1</b> (5)  | DCM (1)               | TMS                | rt               | --                                   | 7d         | 87                       | 93:7                                 |
| 23        | ( <i>R</i> )- <b>B1</b> (5)  | DCM (1)               | TMS                | rt               | Na <sub>2</sub> SO <sub>4</sub> (25) | 6d         | 84                       | 93:7                                 |
| 24        | ( <i>R</i> )- <b>B1</b> (5)  | DCM (1)               | TMS                | rt               | MgSO <sub>4</sub> (25)               | 6d         | 86                       | 92:8                                 |
| 25        | ( <i>R</i> )- <b>B1</b> (5)  | DCM (1)               | TMS                | rt               | 3Å MS (25)                           | 7d         | <5                       | --                                   |
| 26        | ( <i>R</i> )- <b>B1</b> (5)  | DCM (1)               | TMS                | rt               | 4Å MS (25)                           | 7d         | 23                       | 67:33                                |
| 27        | ( <i>R</i> )- <b>B1</b> (5)  | DCM (1)               | TMS                | rt               | 5Å MS (25)                           | 7d         | 85                       | 90:10                                |
| <b>28</b> | <b>(<i>R</i>)-B1 (10)</b>    | <b>DCM (1)</b>        | <b>TMS</b>         | <b>rt</b>        | <b>--</b>                            | <b>3d</b>  | <b>87</b>                | <b>95:5</b>                          |
| <b>29</b> | <b>(<i>R</i>)-B1 (10)</b>    | <b>DCM (1)</b>        | <b><i>t</i>-Bu</b> | <b>rt</b>        | <b>--</b>                            | <b>4d</b>  | <b>92</b>                | <b>97:3</b>                          |
| 30        | ( <i>R</i> )- <b>B1</b> (10) | DCM (1)               | <i>t</i> -Bu       | 10°C             | --                                   | 10d        | 62                       | 96:4                                 |

[a] Unless otherwise specified, all reactions were carried out with catalyst (x mol%), **1** (0.05 mmol) and **4b** (0.06 mmol) in the indicated solvent (x mL) at room temperature. [b] Isolated yield of **5**. [c] Determined by chiral-phase HPLC analysis.

## 2.4 Condition optimization for the synthesis of **7a** from propargylic alcohol **1ae** and 3-methyl-1*H*-indole.

**Table S4.** Screening of catalysts and optimization of reaction conditions<sup>[a]</sup>

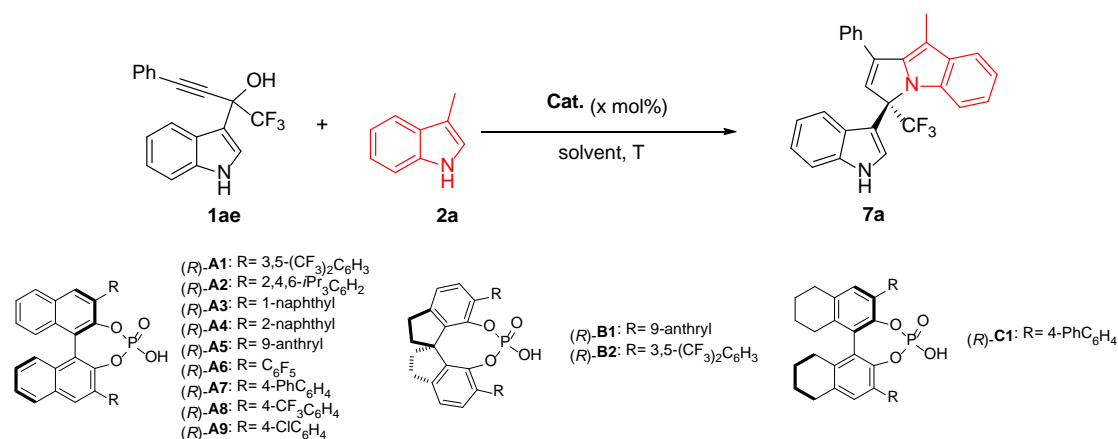

| Entry | Catalyst (x mol%)                      | Solvent (x mL)        | <b>1ae</b> :<br><b>2a</b> | Temperature (°C) | Additive (x mg) | Time       | Yield <sup>[b]</sup> (%) | <i>e</i> <sub>r</sub> <sup>[c]</sup> |
|-------|----------------------------------------|-----------------------|---------------------------|------------------|-----------------|------------|--------------------------|--------------------------------------|
| 1     | $(R)$ - <b>A1</b> (10)                 | DCM (1)               | 1:1.2                     | rt               | --              | 24h        | 84                       | 95:5                                 |
| 2     | $(R)$ - <b>A2</b> (10)                 | DCM (1)               | 1:1.2                     | rt               | --              | 96h        | trace                    | 35:65                                |
| 3     | $(R)$ - <b>A3</b> (10)                 | DCM (1)               | 1:1.2                     | rt               | --              | 13h        | 61                       | 91:9                                 |
| 4     | $(R)$ - <b>A4</b> (10)                 | DCM (1)               | 1:1.2                     | rt               | --              | 13h        | 82                       | 91:9                                 |
| 5     | $(R)$ - <b>A5</b> (10)                 | DCM (1)               | 1:1.2                     | rt               | --              | 24h        | 40                       | 80:20                                |
| 6     | $(R)$ - <b>A6</b> (10)                 | DCM (1)               | 1:1.2                     | rt               | --              | 13h        | 30                       | 53:47                                |
| 7     | <b><math>(R)</math>-<b>A7</b> (10)</b> | <b>DCM (1)</b>        | <b>1:1.2</b>              | <b>rt</b>        | --              | <b>13h</b> | <b>86</b>                | <b>97:3</b>                          |
| 8     | $(R)$ - <b>B1</b> (10)                 | DCM (1)               | 1:1.2                     | rt               | --              | 120h       | 35                       | 58:42                                |
| 9     | $(R)$ - <b>C1</b> (10)                 | DCM (1)               | 1:1.2                     | rt               | --              | 24h        | 38                       | 93:7                                 |
| 10    | $(R)$ - <b>A7</b> (5)                  | DCM (1)               | 1:1.2                     | rt               | --              | 19h        | 84                       | 96:4                                 |
| 11    | $(R)$ - <b>A7</b> (10)                 | DCE (1)               | 1:1.2                     | rt               | --              | 13h        | 76                       | 96:4                                 |
| 12    | $(R)$ - <b>A7</b> (10)                 | CHCl <sub>3</sub> (1) | 1:1.2                     | rt               | --              | 24h        | 34                       | 93:7                                 |
| 13    | $(R)$ - <b>A7</b> (10)                 | toluene (1)           | 1:1.2                     | rt               | --              | 13h        | 72                       | 95:5                                 |
| 14    | $(R)$ - <b>A7</b> (10)                 | THF (1)               | 1:1.2                     | rt               | --              | 72h        | NR                       | --                                   |
| 15    | $(R)$ - <b>A7</b> (10)                 | DCM (2)               | 1:1.2                     | rt               | --              | 20h        | 86                       | 96:4                                 |
| 16    | $(R)$ - <b>A7</b> (10)                 | DCM (1)               | 1:1.2                     | rt               | 4 Å MS (35)     | 72h        | trace                    | 90:10                                |
| 17    | $(R)$ - <b>A7</b> (10)                 | DCM (1)               | 1:1.2                     | 0°C              | --              | 72h        | trace                    | 93:7                                 |
| 18    | $(R)$ - <b>A7</b> (10)                 | DCM (1)               | 1:1.2                     | 0°C              | 4 Å MS (35)     | 72h        | NR                       | --                                   |

[a] Unless otherwise specified, all reactions were carried out with catalyst (x mol%), **1ae** (0.05 mmol) and **2a** (0.06 mmol) in the indicated solvent (x mL) at room temperature. [b] Isolated yield of **7a**. [c] Determined by chiral-phase HPLC analysis.

### 3. Experimental Procedure and Characterization of Substrates

#### a. General Procedure to Prepare Substrates 1a-1ab and 1ae-1ag

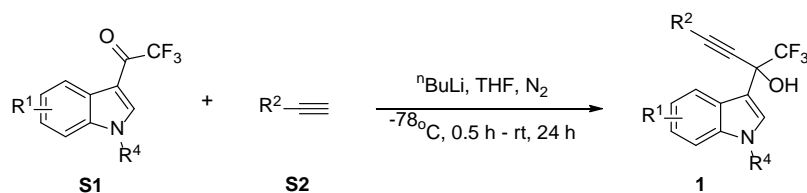

At  $-78^{\circ}\text{C}$ , under  $\text{N}_2$ , a flame-dried flask charged with a solution of the terminal alkyne **S2** (7 mmol, 3.5 equiv) in dry THF (15 mL), was added  $n\text{BuLi}$  (5 mmol, 3.2 mL, 1.6 M in hexane) dropwise. The reaction was stirred for 2 h at  $0^{\circ}\text{C}$ . Then a solution of the corresponding indolyl-ketone **S1** (2 mmol, 1.0 equiv) in THF (5 mL) was added via syringe at  $-78^{\circ}\text{C}$ . The reaction mixture was then slowly warmed up to room temperature and stirred for 24 h. Upon completion, the reaction mixture was cooled to  $0^{\circ}\text{C}$  and cooled water (10 mL) was added dropwise. The organic layer was separated. The aqueous layer was extracted with ethyl acetate ( $3 \times 10$  mL). The combined organic layers were washed with brine (30 mL), dried over anhydrous  $\text{Na}_2\text{SO}_4$ , filtered, and concentrated. The crude product was purified directly by flash column chromatography on silica gel (petroleum ether/ ethyl acetate = 10:1-5:1) or recrystallization to give the desired  $\alpha$ -indolyl propargylic alcohols **1a-1ab**.

At  $-78^{\circ}\text{C}$ , under  $\text{N}_2$ , to a flame-dried flask charged with a solution of the terminal alkyne **S2** (6 mmol, 3 equiv) in dry THF (15 mL) was added  $n\text{BuLi}$  (6 mmol, 2.5 mL, 2.4 M in hexane) dropwise. The reaction was stirred for 0.5 h at the same temperature and then a solution of the corresponding indolyl-ketone **S1** (2 mmol, 1.0 equiv) in THF (5 mL) was added via syringe. The reaction mixture was then slowly warmed up to room temperature and stirred for 32 h. Upon completion, the reaction mixture was cooled to  $0^{\circ}\text{C}$  and a saturated aqueous  $\text{NH}_4\text{Cl}$  solution (7 mL) was added dropwise. The organic layer was separated. The aqueous layer was extracted with ethyl acetate ( $3 \times 10$  mL). The combined organic layers were washed with brine (30 mL), dried over anhydrous  $\text{Na}_2\text{SO}_4$ , filtered, and concentrated. The crude product was purified directly by flash column chromatography on silica gel (petroleum ether/ ethyl acetate = 10:1-5:1) or recrystallization to give the desired  $\alpha$ -indolyl propargylic alcohols **1ae-1ag**.

#### b. General Procedure to Prepare Substrates 1ac

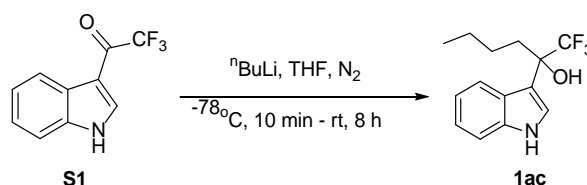

At  $-78^{\circ}\text{C}$ , under  $\text{N}_2$ , a flame-dried flask was charged with a solution of  $n\text{BuLi}$  (6 mmol, 3.75 mL, 1.6 M in hexane) in dry THF (15 mL). The solution was stirred for 10 min at the same temperature, then a solution of indolyl-ketone **S1** (2 mmol, 1.0 equiv) in THF (5 mL) was added via syringe. The reaction mixture was then slowly warmed up to room temperature and stirred for 8 h. Upon completion, the reaction mixture was cooled to  $0^{\circ}\text{C}$  and a saturated aqueous  $\text{NH}_4\text{Cl}$  solution (7 mL) was added dropwise. The organic layer was separated. The aqueous layer was extracted with ethyl acetate ( $3 \times 10$  mL). The combined organic layers were washed with brine (30 mL), dried over anhydrous  $\text{Na}_2\text{SO}_4$ , filtered, and concentrated. The crude product was purified directly by flash column chromatography on silica gel (petroleum ether/ ethyl acetate = 10:1-5:1) to give the desired  $\alpha$ -indolyl propargylic alcohols **1ac**.

### c. General Procedure to Prepare Substrates 1ad

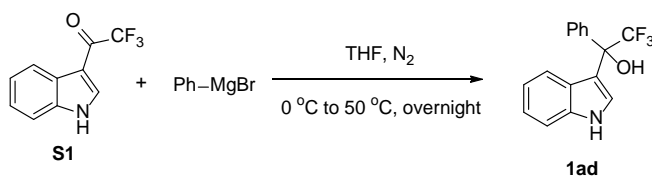

At 0 °C, under N<sub>2</sub>, a flame-dried flask was charged with a solution of the corresponding magnesium bromide solution (5 mL, 1.0 mol/L) in dry THF (15 mL), and the solution was stirred for 10 min at the same temperature. Then a solution of indolyl-ketone **S1** (2 mmol, 1.0 equiv) in THF (5 mL) was added via syringe. Subsequently, the reaction mixture was moved to an oil bath and refluxed at 50 °C overnight. Upon completion, the reaction mixture was cooled to 0 °C and a saturated aqueous NH<sub>4</sub>Cl solution (7 mL) was added dropwise. The organic layer was separated. The aqueous layer was extracted with ethyl acetate (3×10 mL). The combined organic layers were washed with brine (30 mL), dried over anhydrous Na<sub>2</sub>SO<sub>4</sub>, filtered, and concentrated. The crude product was purified directly by flash column chromatography on silica gel (petroleum ether/ ethyl acetate = 10:1~5:1) to give the desired α-indolyl propargylic alcohols **1ad**.

### d. Analytical Data for Substrates 1a-1af

#### 1,1,1-trifluoro-2-(1*H*-indol-3-yl)-5,5-dimethylhex-3-yn-2-ol (**1a**)

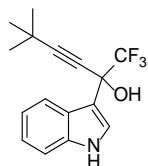

light brown solid, 82% yield. M.p. 125.3.2-126.8 °C. **<sup>1</sup>H NMR** (400 MHz, DMSO-d<sub>6</sub>) δ: 11.24 (s, 1H), 7.80 (d, *J* = 7.9 Hz, 1H), 7.45-7.35 (m, 2H), 7.20 (s, 1H), 7.10 (t, *J* = 7.5 Hz, 1H), 7.02 (t, *J* = 7.5 Hz, 1H), 1.26 (s, 9H). **<sup>13</sup>C NMR** (126 MHz, DMSO-d<sub>6</sub>) δ: 137.1, 125.8, 125.4, 125.0 (q, *J* = 286.0 Hz), 121.7, 121.2, 119.4, 112.2, 112.2, 94.5, 76.5, 69.5 (q, *J* = 32.6 Hz), 30.8, 27.6; **<sup>19</sup>F NMR** (376 MHz, DMSO-d<sub>6</sub>) δ: -79.41. IR (ATR) *v*<sub>max</sub>: 3409, 2971, 1174, 1001, 745 cm<sup>-1</sup>. **HRMS** (ESI): *m/z* calcd. for C<sub>16</sub>H<sub>15</sub>NOF<sub>3</sub> [M-H]<sup>-</sup>: 294.1111; found: 294.1101.

#### 1,1,1-trifluoro-2-(4-fluoro-1*H*-indol-3-yl)-5,5-dimethylhex-3-yn-2-ol (**1b**)

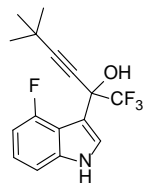

light brown solid, 83% yield. M.p. 120.2-121.5 °C. **<sup>1</sup>H NMR** (400 MHz, DMSO-d<sub>6</sub>) δ: 11.52 (s, 1H), 7.47 (d, *J* = 2.6 Hz, 1H), 7.24 (d, *J* = 8.1 Hz, 1H), 7.11 (s, 2H), 6.77 (dd, *J* = 11.7, 7.7 Hz, 1H), 1.23 (s, 9H). **<sup>13</sup>C NMR** (101 MHz, DMSO-d<sub>6</sub>) δ: 155.3 (d, *J* = 250.1 Hz), 139.9 (d, *J* = 11.0 Hz), 126.3, 124.1 (q, *J* = 285.5 Hz), 122.1 (d, *J* = 7.8 Hz), 113.5 (d, *J* = 19.8 Hz), 110.9 (d, *J* = 3.6 Hz), 108.1 (d, *J* = 3.6 Hz), 105.1 (d, *J* = 21.3 Hz), 93.7, 76.3, 68.7 (q, *J* = 32.6 Hz), 30.3, 27.1. **<sup>19</sup>F NMR** (376 MHz, DMSO-d<sub>6</sub>) δ: -79.15 (d, *J* = 15.2 Hz), -108.09~-115.19 (m). IR (ATR) *v*<sub>max</sub>: 3394, 2899, 1205, 998, 708 cm<sup>-1</sup>. **HRMS** (ESI): *m/z* calcd. for C<sub>16</sub>H<sub>15</sub>NOF<sub>4</sub> [M-H]<sup>-</sup>: 312.1017; found: 312.1013.

#### 1,1,1-trifluoro-2-(5-fluoro-1*H*-indol-3-yl)-5,5-dimethylhex-3-yn-2-ol (**1c**)

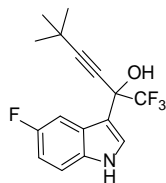

light brown solid, 91% yield. M.p. 110.4-111.6 °C. **<sup>1</sup>H NMR** (400 MHz, CDCl<sub>3</sub>) δ: 8.29 (s, 1H), 7.74-7.55 (m, 1H), 7.43 (d, *J* = 2.7 Hz, 1H), 7.24 (dd, *J* = 8.9, 4.4 Hz, 1H), 6.97 (td, *J* = 9.0, 2.4 Hz, 1H), 3.15 (s, 1H), 1.30 (s, 9H). **<sup>13</sup>C NMR** (126 MHz, CDCl<sub>3</sub>) δ: 158.1 (d, *J* = 234.6 Hz), 133.1, 126.5, 125.5 (d, *J* = 10.8 Hz), 124.1 (q, *J* = 285.3 Hz), 112.3 (d, *J* = 4.7 Hz), 112.1 (d, *J* = 9.7 Hz), 111.2 (d, *J* = 26.6 Hz), 106.3 (d, *J* = 25.0 Hz), 96.9, 74.6, 70.3 (q, *J* = 34.1 Hz), 30.5, 27.7. **<sup>19</sup>F NMR** (376 MHz, CDCl<sub>3</sub>) δ: -80.67, -123.46. IR (ATR) *v*<sub>max</sub>: 3441, 2985, 1133, 1010, 740 cm<sup>-1</sup>. **HRMS** (ESI): *m/z* calcd. for C<sub>16</sub>H<sub>15</sub>NOF<sub>4</sub> [M-H]<sup>-</sup>: 312.1017; found: 312.1011.

2-(5-chloro-1H-indol-3-yl)-1,1,1-trifluoro-5,5-dimethylhex-3-yn-2-ol (**1d**)

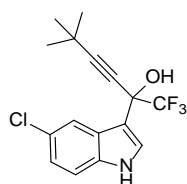

light brown solid, 80% yield. M.p. 150.2-151.7 °C. **<sup>1</sup>H NMR** (500 MHz, DMSO-*d*<sub>6</sub>) δ: 11.47 (s, 1H), 7.79 (s, 1H), 7.49 (d, *J* = 2.7 Hz, 1H), 7.43 (d, *J* = 8.7 Hz, 1H), 7.33 (s, 1H), 7.12 (dd, *J* = 8.7, 2.1 Hz, 1H), 1.27 (s, 9H). **<sup>13</sup>C NMR** (126 MHz, DMSO-*d*<sub>6</sub>) δ: 135.1, 127.1, 126.0, 124.4 (q, *J* = 285.6 Hz), 123.7, 121.1 (d, *J* = 29.8 Hz), 119.7, 113.4, 111.6, 94.5, 75.7, 68.8 (q, *J* = 32.7 Hz), 30.3, 27.1. **<sup>19</sup>F NMR** (471 MHz, DMSO-*d*<sub>6</sub>) δ: -79.70. IR (ATR) *v*<sub>max</sub>: 3399, 3000, 1198, 990, 743 cm<sup>-1</sup>. **HRMS** (ESI): *m/z* calcd. for C<sub>16</sub>H<sub>15</sub>NOF<sub>3</sub>Cl [M-H]<sup>-</sup>: 328.0722; found: 328.0731.

2-(5-bromo-1H-indol-3-yl)-1,1,1-trifluoro-5,5-dimethylhex-3-yn-2-ol (**1e**)

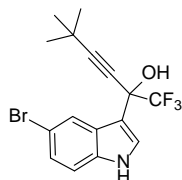

light brown solid, 83% yield. M.p. 152.1-152.9 °C. **<sup>1</sup>H NMR** (500 MHz, CDCl<sub>3</sub>) δ: 8.27 (s, 1H), 8.14 (s, 1H), 7.41 (d, *J* = 2.6 Hz, 1H), 7.29 (d, *J* = 1.1 Hz, 1H), 7.22 (d, *J* = 8.7 Hz, 1H), 2.98 (s, 1H), 1.31 (s, 9H). **<sup>13</sup>C NMR** (126 MHz, CDCl<sub>3</sub>) δ: 135.2, 126.8, 125.8, 125.6, 124.0 (q, *J* = 285.4 Hz), 123.9, 113.8, 112.9, 112.0, 97.1, 74.6, 70.2 (q, *J* = 34.2 Hz), 30.6, 27.7. **<sup>19</sup>F NMR** (471 MHz, CDCl<sub>3</sub>) δ: -80.81. IR (ATR) *v*<sub>max</sub>: 3400, 2937, 1168, 1005, 756 cm<sup>-1</sup>. **HRMS** (ESI): *m/z* calcd. for C<sub>16</sub>H<sub>15</sub>NOF<sub>3</sub>Br [M-H]<sup>-</sup>: 372.0216; found: 372.0207.

1,1,1-trifluoro-5,5-dimethyl-2-(5-methyl-1H-indol-3-yl)hex-3-yn-2-ol (**1f**)

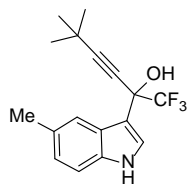

light brown solid, 84% yield. M.p. 158.3-159.6 °C. **<sup>1</sup>H NMR** (400 MHz, CDCl<sub>3</sub>) δ: 8.14 (s, 1H), 7.79 (s, 1H), 7.37 (d, *J* = 2.6 Hz, 1H), 7.25 (d, *J* = 8.6 Hz, 1H), 7.06 (d, *J* = 8.3 Hz, 1H), 3.02 (s, 1H), 2.47 (s, 3H), 1.32 (s, 9H). **<sup>13</sup>C**

**NMR** (126 MHz, CDCl<sub>3</sub>)  $\delta$ : 135.0, 129.7, 125.3, 125.0, 124.3, 124.2 (q,  $J$  = 285.5 Hz), 120.9, 111.8, 111.1, 96.4, 75.1, 70.6 (q,  $J$  = 34.1 Hz), 30.6, 27.7, 21.7. **<sup>19</sup>F NMR** (376 MHz, CDCl<sub>3</sub>)  $\delta$ : -80.49. IR (ATR)  $\nu_{max}$ : 3411, 2999, 1170, 995, 740 cm<sup>-1</sup>. **HRMS** (ESI):  $m/z$  calcd. for C<sub>17</sub>H<sub>18</sub>NOF<sub>3</sub> [M-H]<sup>-</sup>: 308.1268; found: 308.1264.

1,1,1-trifluoro-2-(5-methoxy-1*H*-indol-3-yl)-5,5-dimethylhex-3-yn-2-ol (**1g**)

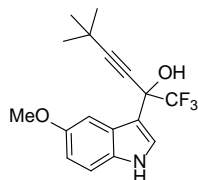

light brown solid, 76% yield. M.p. 141.0-142.3 °C. **<sup>1</sup>H NMR** (400 MHz, DMSO-d<sub>6</sub>)  $\delta$ : 11.10 (s, 1H), 7.37 (d,  $J$  = 2.7 Hz, 1H), 7.30 (d,  $J$  = 8.8 Hz, 1H), 7.27 (d,  $J$  = 1.7 Hz, 1H), 7.17 (s, 1H), 6.78 (dd,  $J$  = 8.8, 2.5 Hz, 1H), 3.74 (s, 3H), 1.27 (s, 9H). **<sup>13</sup>C NMR** (126 MHz, DMSO-d<sub>6</sub>)  $\delta$ : 153.1, 131.8, 125.8, 125.3, 124.6 (q,  $J$  = 285.8 Hz), 112.3, 111.5, 111.4, 102.5, 94.1, 75.9, 69.0 (q,  $J$  = 32.5 Hz), 55.3, 30.4, 27.1. **<sup>19</sup>F NMR** (376 MHz, DMSO-d<sub>6</sub>)  $\delta$ : -79.39. IR (ATR)  $\nu_{max}$ : 3419, 2981, 1133, 1007, 747 cm<sup>-1</sup>. **HRMS** (ESI):  $m/z$  calcd. for C<sub>17</sub>H<sub>18</sub>NO<sub>2</sub>F<sub>3</sub> [M-H]<sup>-</sup>: 324.1217; found: 324.1209.

1,1,1-trifluoro-2-(6-fluoro-1*H*-indol-3-yl)-5,5-dimethylhex-3-yn-2-ol (**1h**)

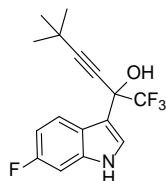

light brown solid, 76% yield. M.p. 113.5-114.9 °C. **<sup>1</sup>H NMR** (400 MHz, CDCl<sub>3</sub>)  $\delta$ : 8.24 (s, 1H), 7.89 (dd,  $J$  = 8.8, 5.4 Hz, 1H), 7.37 (d,  $J$  = 2.6 Hz, 1H), 7.02 (dd,  $J$  = 9.4, 2.3 Hz, 1H), 6.94 (td,  $J$  = 9.3, 2.3 Hz, 1H), 3.10 (s, 1H), 1.30 (s, 9H). **<sup>13</sup>C NMR** (126 MHz, CDCl<sub>3</sub>)  $\delta$ : 160.2 (d,  $J$  = 238.9 Hz), 136.7 (d,  $J$  = 12.3 Hz), 125.2, 124.1 (q,  $J$  = 285.2 Hz), 122.3 (d,  $J$  = 9.5 Hz), 121.7, 112.5, 109.4 (d,  $J$  = 24.4 Hz), 97.6 (d,  $J$  = 26.1 Hz), 96.7, 74.8, 70.5 (q,  $J$  = 34.4 Hz), 30.6, 27.7. **<sup>19</sup>F NMR** (376 MHz, CDCl<sub>3</sub>)  $\delta$ : -80.56, -120.42. IR (ATR)  $\nu_{max}$ : 3400, 2988, 1169, 1008, 736 cm<sup>-1</sup>. **HRMS** (ESI):  $m/z$  calcd. for C<sub>16</sub>H<sub>15</sub>NOF<sub>4</sub> [M-H]<sup>-</sup>: 312.1017; found: 312.1009.

2-(6-chloro-1*H*-indol-3-yl)-1,1,1-trifluoro-5,5-dimethylhex-3-yn-2-ol (**1i**)

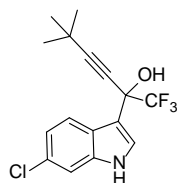

light brown solid, 75% yield. M.p. 140.4-141.2 °C. **<sup>1</sup>H NMR** (400 MHz, CDCl<sub>3</sub>)  $\delta$ : 8.27 (s, 1H), 7.87 (d,  $J$  = 8.6 Hz, 1H), 7.39 (d,  $J$  = 2.6 Hz, 1H), 7.33 (d,  $J$  = 1.4 Hz, 1H), 7.14 (dd,  $J$  = 8.7, 1.6 Hz, 1H), 3.12 (s, 1H), 1.29 (s, 9H). **<sup>13</sup>C NMR** (126 MHz, CDCl<sub>3</sub>)  $\delta$ : 137.0, 128.7, 125.5, 124.0 (q,  $J$  = 285.4 Hz), 123.7, 122.3, 121.3, 112.6, 111.3, 96.9, 74.7, 70.4 (q,  $J$  = 34.2 Hz), 30.6, 27.7. **<sup>19</sup>F NMR** (376 MHz, CDCl<sub>3</sub>)  $\delta$ : -80.67. IR (ATR)  $\nu_{max}$ : 3411, 2982, 1179, 1003, 747 cm<sup>-1</sup>. **HRMS** (ESI):  $m/z$  calcd. for C<sub>16</sub>H<sub>15</sub>NOF<sub>3</sub>Cl [M-H]<sup>-</sup>: 328.0722; found: 328.0717.

1,1,1-trifluoro-2-(6-methoxy-1*H*-indol-3-yl)-5,5-dimethylhex-3-yn-2-ol (**1j**)

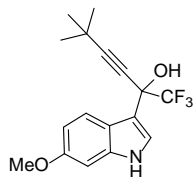

light brown solid, 83% yield. M.p. 137.9-139.0 °C. **<sup>1</sup>H NMR** (500 MHz, CDCl<sub>3</sub>) δ: 8.10 (s, 1H), 7.83 (d, *J* = 8.8 Hz, 1H), 7.28 (s, 1H), 6.84 (d, *J* = 8.8 Hz, 1H), 6.76 (s, 1H), 3.81 (s, 3H), 3.14 (s, 1H), 1.29 (s, 9H). **<sup>13</sup>C NMR** (126 MHz, CDCl<sub>3</sub>) δ: 156.6, 137.5, 124.2 (q, *J* = 285.3 Hz), 123.8, 121.9, 119.4, 112.2, 110.5, 96.4, 94.7, 75.0, 70.5 (q, *J* = 34.2 Hz), 55.7, 30.6, 27.7. **<sup>19</sup>F NMR** (471 MHz, CDCl<sub>3</sub>) δ: -80.49. IR (ATR) *v*<sub>max</sub>: 3398, 2969, 1179, 995, 738 cm<sup>-1</sup>. **HRMS** (ESI): *m/z* calcd. for C<sub>17</sub>H<sub>18</sub>NO<sub>2</sub>F<sub>3</sub> [M-H]<sup>-</sup>: 324.1217; found: 324.1211.

1,1,1-trifluoro-2-(1*H*-indol-3-yl)-4-(trimethylsilyl)but-3-yn-2-ol (**1k**)

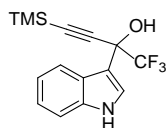

light brown solid, 67% yield. M.p. 114.1-114.9 °C. **<sup>1</sup>H NMR** (500 MHz, CDCl<sub>3</sub>) δ: 8.25 (s, 1H), 7.97 (d, *J* = 8.0 Hz, 1H), 7.45 (d, *J* = 2.7 Hz, 1H), 7.37 (d, *J* = 8.1 Hz, 1H), 7.28-7.21 (m, 1H), 7.19 (dd, *J* = 11.2, 4.0 Hz, 1H), 3.09 (s, 1H), 0.26 (s, 9H). **<sup>13</sup>C NMR** (126 MHz, CDCl<sub>3</sub>) δ: 136.7, 125.1, 124.9, 123.9 (q, *J* = 288.9 Hz), 122.8, 121.3, 120.5, 111.5, 100.3, 93.3, 70.8 (q, *J* = 34.1 Hz), -0.3. **<sup>19</sup>F NMR** (376 MHz, CDCl<sub>3</sub>) δ: -80.05. IR (ATR) *v*<sub>max</sub>: 3411, 2961, 1252, 1178, 844, 745 cm<sup>-1</sup>. **HRMS** (ESI): *m/z* calcd. for C<sub>15</sub>H<sub>15</sub>NOF<sub>3</sub>Si [M-H]<sup>-</sup>: 310.0880; found: 310.0871.

1,1,1-trifluoro-2-(5-fluoro-1*H*-indol-3-yl)-4-(trimethylsilyl)but-3-yn-2-ol (**1l**)

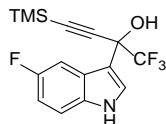

light brown solid, 78% yield. M.p. 83.9-84.6 °C. **<sup>1</sup>H NMR** (400 MHz, CDCl<sub>3</sub>) δ: 8.30 (s, 1H), 7.65 (d, *J* = 10.1 Hz, 1H), 7.48 (d, *J* = 2.8 Hz, 1H), 7.28 (dd, *J* = 9.0, 4.2 Hz, 1H), 6.99 (td, *J* = 9.0, 2.5 Hz, 1H), 3.17 (s, 1H), 0.27 (s, 9H). **<sup>13</sup>C NMR** (126 MHz, CDCl<sub>3</sub>) δ: 158.2 (d, *J* = 235.0 Hz), 133.1, 126.6, 125.4 (d, *J* = 10.8 Hz), 123.9 (q, *J* = 285.5 Hz), 112.2 (d, *J* = 9.8 Hz), 111.5, 111.3, 106.3 (d, *J* = 25.4 Hz), 99.9, 93.7, 70.6 (q, *J* = 34.3 Hz), -0.4. **<sup>19</sup>F NMR** (376 MHz, CDCl<sub>3</sub>) δ: -80.26, -123.26. IR (ATR) *v*<sub>max</sub>: 3408, 2969, 1254, 1166, 849, 735 cm<sup>-1</sup>. **HRMS** (ESI): *m/z* calcd. for C<sub>15</sub>H<sub>15</sub>NOF<sub>4</sub>Si [M-H]<sup>-</sup>: 328.0786; found: 328.0777.

2-(5-chloro-1*H*-indol-3-yl)-1,1,1-trifluoro-4-(trimethylsilyl)but-3-yn-2-ol (**1m**)

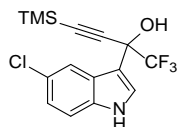

light brown solid, 77% yield. M.p. 134.2-135.7 °C. **<sup>1</sup>H NMR** (400 MHz, CDCl<sub>3</sub>) δ: 8.34 (s, 1H), 7.98 (s, 1H), 7.45 (d, *J* = 2.7 Hz, 1H), 7.30-7.23 (m, 1H), 7.19 (dd, *J* = 8.7, 1.9 Hz, 1H), 3.22 (s, 1H), 0.28 (s, 9H). **<sup>13</sup>C NMR** (126 MHz, CDCl<sub>3</sub>) δ: 135.0, 126.4, 126.2, 126.1, 123.8 (q, *J* = 285.5 Hz), 123.2, 120.8, 112.7, 111.3, 99.9, 93.9, 70.5 (q, *J* = 34.3 Hz), -0.4. **<sup>19</sup>F NMR** (376 MHz, CDCl<sub>3</sub>) δ: -80.28. IR (ATR) *v*<sub>max</sub>: 3400, 2997, 1244, 1169, 857, 737 cm<sup>-1</sup>. **HRMS** (ESI): *m/z* calcd. for C<sub>15</sub>H<sub>15</sub>NOF<sub>3</sub>SiCl [M-H]<sup>-</sup>: 344.0491; found: 344.0487.

2-(5-bromo-1*H*-indol-3-yl)-1,1,1-trifluoro-4-(trimethylsilyl)but-3-yn-2-ol (**1n**)

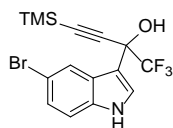

light brown solid, 90% yield. M.p. 147.4-148.3 °C. **<sup>1</sup>H NMR** (400 MHz, CDCl<sub>3</sub>) δ: 8.33 (s, 1H), 8.13 (s, 1H), 7.43 (d, *J* = 2.7 Hz, 1H), 7.31 (dd, *J* = 8.7, 1.8 Hz, 1H), 7.22 (d, *J* = 8.7 Hz, 1H), 3.17 (s, 1H), 0.27 (s, 9H). **<sup>13</sup>C NMR** (126 MHz, CDCl<sub>3</sub>) δ: 135.3, 126.7, 126.0, 125.8, 123.8, 123.7 (q, *J* = 285.5 Hz), 114.0, 112.9, 111.2, 99.8, 94.0, 70.4 (q, *J* = 34.4 Hz), -0.4. **<sup>19</sup>F NMR** (376 MHz, CDCl<sub>3</sub>) δ: -80.33. IR (ATR) *v*<sub>max</sub>: 3424, 2955, 1245, 1169, 854, 749 cm<sup>-1</sup>. **HRMS** (ESI): *m/z* calcd. for C<sub>15</sub>H<sub>15</sub>NOF<sub>3</sub>SiBr [M-H]<sup>-</sup>: 387.9986; found: 387.9986.

1,1,1-trifluoro-2-(5-methyl-1*H*-indol-3-yl)-4-(trimethylsilyl)but-3-yn-2-ol (**1o**)

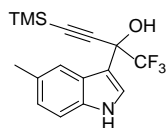

light brown solid, 81% yield. M.p. 153.0-153.8 °C. **<sup>1</sup>H NMR** (400 MHz, CDCl<sub>3</sub>) δ: 8.15 (s, 1H), 7.77 (s, 1H), 7.39 (d, *J* = 2.6 Hz, 1H), 7.25 (d, *J* = 8.2 Hz, 1H), 7.07 (d, *J* = 8.2 Hz, 1H), 3.13 (s, 1H), 2.47 (s, 3H), 0.26 (s, 9H). **<sup>13</sup>C NMR** (101 MHz, CDCl<sub>3</sub>) δ: 135.0, 129.8, 125.1, 124.4, 124.1, 123.9 (q, *J* = 285.5 Hz), 120.8, 111.1, 110.8, 100.4, 93.2, 70.8 (q, *J* = 34.2 Hz), 21.7, -0.4. **<sup>19</sup>F NMR** (376 MHz, CDCl<sub>3</sub>) δ: -80.00. IR (ATR) *v*<sub>max</sub>: 3430, 2951, 1244, 1171, 839, 739 cm<sup>-1</sup>. **HRMS** (ESI): *m/z* calcd. for C<sub>16</sub>H<sub>18</sub>NOF<sub>3</sub>Si [M-H]<sup>-</sup>: 324.1037; found: 324.1031.

1,1,1-trifluoro-2-(5-methoxy-1*H*-indol-3-yl)-4-(trimethylsilyl)but-3-yn-2-ol (**1p**)

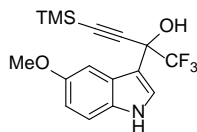

light brown solid, 84% yield. M.p. 145.5-146.7 °C. **<sup>1</sup>H NMR** (400 MHz, CDCl<sub>3</sub>) δ: 8.21 (s, 1H), 7.44 (d, *J* = 2.9 Hz, 2H), 7.27 (d, *J* = 8.5 Hz, 1H), 6.92 (dd, *J* = 8.9, 2.4 Hz, 1H), 3.88 (s, 3H), 3.13 (s, 1H), 0.27 (s, 9H). **<sup>13</sup>C NMR** (126 MHz, CDCl<sub>3</sub>) δ: 154.5, 131.8, 125.7, 125.4, 124.0 (q, *J* = 285.6 Hz), 113.4, 112.2, 111.2, 102.8, 100.3, 93.1, 70.8 (q, *J* = 34.3 Hz), 56.0, -0.3. **<sup>19</sup>F NMR** (376 MHz, CDCl<sub>3</sub>) δ: -80.00. IR (ATR) *v*<sub>max</sub>: 3421, 2965, 1260, 1181, 849, 752 cm<sup>-1</sup>. **HRMS** (ESI): *m/z* calcd. for C<sub>16</sub>H<sub>18</sub>NO<sub>2</sub>F<sub>3</sub>Si [M-H]<sup>-</sup>: 340.0986; found: 340.0980.

2-(6-chloro-1*H*-indol-3-yl)-1,1,1-trifluoro-4-(trimethylsilyl)but-3-yn-2-ol (**1q**)

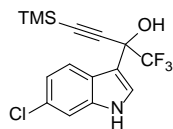

light brown solid, 87% yield. M.p. 140.2-140.8 °C. **<sup>1</sup>H NMR** (400 MHz, CDCl<sub>3</sub>) δ: 8.24 (s, 1H), 7.87 (d, *J* = 8.6 Hz, 1H), 7.42 (d, *J* = 2.7 Hz, 1H), 7.33 (d, *J* = 1.6 Hz, 1H), 7.15 (dd, *J* = 8.7, 1.8 Hz, 1H), 3.11 (s, 1H), 0.25 (s, 9H). **<sup>13</sup>C NMR** (101 MHz, CDCl<sub>3</sub>) δ: 137.0, 128.8, 125.7, 123.8 (q, *J* = 285.7 Hz), 123.5, 122.2, 121.4, 111.7, 111.4, 99.9, 93.7, 70.6 (q, *J* = 34.3 Hz), -0.4. **<sup>19</sup>F NMR** (376 MHz, CDCl<sub>3</sub>) δ: -80.21. IR (ATR) *v*<sub>max</sub>: 3408, 2969, 1247, 1170, 849, 751 cm<sup>-1</sup>. **HRMS** (ESI): *m/z* calcd. for C<sub>15</sub>H<sub>15</sub>NOF<sub>3</sub>SiCl [M-H]<sup>-</sup>: 344.0491; found: 344.0484.

1,1,1-trifluoro-2-(6-methoxy-1*H*-indol-3-yl)-4-(trimethylsilyl)but-3-yn-2-ol (**1r**)



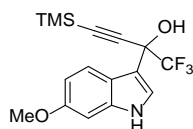

light brown solid, 85% yield. M.p. 137.4-140.2 °C. **<sup>1</sup>H NMR** (500 MHz, CDCl<sub>3</sub>) δ: 8.12 (s, 1H), 7.82 (d, *J* = 8.6 Hz, 1H), 7.30 (s, 1H), 6.84 (d, *J* = 8.4 Hz, 1H), 6.76 (s, 1H), 3.81 (s, 3H), 3.29 (s, 1H), 0.24 (s, 9H). **<sup>13</sup>C NMR** (126 MHz, CDCl<sub>3</sub>) δ: 156.7, 137.5, 124.0, 123.9 (q, *J* = 285.5 Hz), 121.9, 119.3, 111.4, 110.6, 100.3, 94.8, 93.1, 70.8 (q, *J* = 34.0 Hz), 55.7, -0.4. **<sup>19</sup>F NMR** (471 MHz, CDCl<sub>3</sub>) δ: -80.01. IR (ATR) *v*<sub>max</sub>: 3409, 2957, 1246, 1181, 851, 739 cm<sup>-1</sup>. **HRMS** (ESI): *m/z* calcd. for C<sub>16</sub>H<sub>18</sub>NO<sub>2</sub>F<sub>3</sub>Si [M-H]<sup>-</sup>: 340.0986; found: 340.0978.

(*E*)-1,1,1-trifluoro-2-(1*H*-indol-3-yl)-4-(trimethylsilyl)but-3-en-2-ol (**1s**)

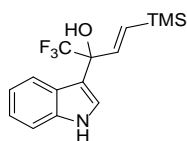

light brown solid, 93% yield. M.p. 68.8-69.4 °C. **<sup>1</sup>H NMR** (400 MHz, CDCl<sub>3</sub>) δ: 8.13 (s, 1H), 7.69 (d, *J* = 8.1 Hz, 1H), 7.27 (d, *J* = 8.1 Hz, 1H), 7.21-7.08 (m, 2H), 7.04 (dd, *J* = 11.1, 4.0 Hz, 1H), 6.43 (d, *J* = 18.8 Hz, 1H), 6.29 (d, *J* = 18.8 Hz, 1H), 2.61 (s, 1H), 0.02 (s, 9H). **<sup>13</sup>C NMR** (101 MHz, CDCl<sub>3</sub>) δ: 140.6, 136.5, 134.2, 125.4 (q, *J* = 286.0 Hz), 125.3, 123.7, 122.7, 121.5, 120.3, 112.7, 111.5, 77.1 (q, *J* = 21.0 Hz), -1.4. **<sup>19</sup>F NMR** (376 MHz, CDCl<sub>3</sub>) δ: -78.44. IR (ATR) *v*<sub>max</sub>: 3409, 2956, 1248, 1163, 837, 742 cm<sup>-1</sup>. **HRMS** (ESI): *m/z* calcd. for C<sub>15</sub>H<sub>18</sub>NOF<sub>3</sub>Si [M-H]<sup>-</sup>: 312.1037; found: 312.1031.

(*E*)-1,1,1-trifluoro-2-(5-fluoro-1*H*-indol-3-yl)-4-(trimethylsilyl)but-3-en-2-ol (**1t**)

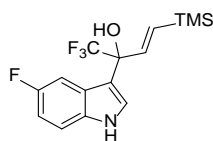

light brown solid, 83% yield. M.p. 87.1-87.9 °C. **<sup>1</sup>H NMR** (400 MHz, CDCl<sub>3</sub>) δ: 8.29 (s, 1H), 7.46 (dd, *J* = 10.2, 2.2 Hz, 1H), 7.35-7.21 (m, 2H), 6.98 (td, *J* = 9.0, 2.5 Hz, 1H), 6.51 (d, *J* = 18.8 Hz, 1H), 6.38 (d, *J* = 18.8 Hz, 1H), 2.71 (s, 1H), 0.14 (s, 9H). **<sup>13</sup>C NMR** (126 MHz, CDCl<sub>3</sub>) δ: 158.0 (d, *J* = 234.9 Hz), 140.3, 134.5, 133.0, 125.8 (d, *J* = 10.4 Hz), 125.4 (q, *J* = 286.2 Hz), 125.4, 112.8 (d, *J* = 4.7 Hz), 112.1 (d, *J* = 9.8 Hz), 111.3 (d, *J* = 26.5 Hz), 106.6 (d, *J* = 24.9 Hz), 76.7 (q, *J* = 29.7 Hz), -1.4. **<sup>19</sup>F NMR** (376 MHz, CDCl<sub>3</sub>) δ: -78.59, -123.39. IR (ATR) *v*<sub>max</sub>: 3411, 2958, 1251, 1160, 840, 741 cm<sup>-1</sup>. **HRMS** (ESI): *m/z* calcd. for C<sub>15</sub>H<sub>17</sub>NOF<sub>4</sub>Si [M-H]<sup>-</sup>: 330.0943; found: 330.0938.

(*E*)-2-(5-chloro-1*H*-indol-3-yl)-1,1,1-trifluoro-4-(trimethylsilyl)but-3-en-2-ol (**1u**)

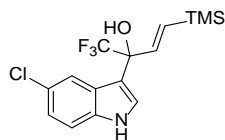

light brown solid, 61% yield. M.p. 127.2-127.8 °C. **<sup>1</sup>H NMR** (400 MHz, CDCl<sub>3</sub>) δ: 8.29 (s, 1H), 7.79 (s, 1H), 7.27 (d, *J* = 9.7 Hz, 2H), 7.18 (d, *J* = 7.7 Hz, 1H), 6.51 (d, *J* = 18.7 Hz, 1H), 6.40 (d, *J* = 18.8 Hz, 1H), 2.70 (s, 1H), 0.16 (s, 9H). **<sup>13</sup>C NMR** (126 MHz, CDCl<sub>3</sub>) δ: 140.2, 134.8, 126.5, 126.1, 125.3 (q, *J* = 286.2 Hz), 125.0, 123.1, 121.1, 112.4, 112.4, 76.7 (q, *J* = 29.9 Hz), -1.4. **<sup>19</sup>F NMR** (376 MHz, CDCl<sub>3</sub>) δ: -78.54. IR (ATR) *v*<sub>max</sub>: 3408, 2951, 1247, 1155, 845, 744 cm<sup>-1</sup>. **HRMS** (ESI): *m/z* calcd. for C<sub>15</sub>H<sub>17</sub>NOF<sub>3</sub>SiCl [M-H]<sup>-</sup>: 346.0647; found: 346.0647.

(*E*)-2-(5-bromo-1*H*-indol-3-yl)-1,1,1-trifluoro-4-(trimethylsilyl)but-3-en-2-ol (**1v**)

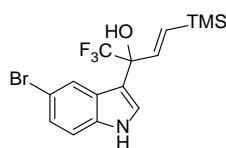

light brown solid, 65% yield. M.p. 133.4-133.5 °C. **<sup>1</sup>H NMR** (400 MHz, DMSO-*d*<sub>6</sub>) δ: 11.46 (s, 1H), 7.85 (s, 1H), 7.52-7.33 (m, 2H), 7.22 (d, *J* = 8.2 Hz, 1H), 6.70 (s, 1H), 6.51 (d, *J* = 18.6 Hz, 1H), 6.33 (d, *J* = 18.6 Hz, 1H), 0.12 (s, 9H). **<sup>13</sup>C NMR** (126 MHz, DMSO-*d*<sub>6</sub>) δ: 141.6, 135.1, 132.2, 127.3, 126.1, 125.7 (q, *J* = 287.0 Hz), 123.7, 123.4, 113.7, 111.7, 111.6, 75.5 (q, *J* = 28.6 Hz), -1.4. **<sup>19</sup>F NMR** (376 MHz, DMSO-*d*<sub>6</sub>) δ: -77.21. IR (ATR)  $\nu_{max}$ : 3420, 2948, 1254, 1154, 835, 745 cm<sup>-1</sup>. **HRMS** (ESI): *m/z* calcd. for C<sub>15</sub>H<sub>17</sub>NOF<sub>3</sub>SiBr [M-H]<sup>-</sup>: 390.0142; found: 390.0124.

(*E*)-1,1,1-trifluoro-2-(5-methyl-1*H*-indol-3-yl)-4-(trimethylsilyl)but-3-en-2-ol (**1w**)

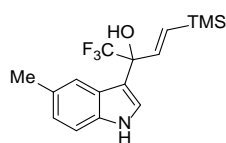

light brown solid, 85% yield. M.p. 113.2-114.1 °C. **<sup>1</sup>H NMR** (400 MHz, CDCl<sub>3</sub>) δ: 8.16 (s, 1H), 7.63 (s, 1H), 7.38-7.21 (m, 2H), 7.11 (d, *J* = 8.3 Hz, 1H), 6.56 (d, *J* = 18.8 Hz, 1H), 6.45 (d, *J* = 18.8 Hz, 1H), 2.73 (s, 1H), 2.50 (s, 3H), 0.19 (s, 9H). **<sup>13</sup>C NMR** (126 MHz, CDCl<sub>3</sub>) δ: 140.6, 134.8, 134.1, 129.6, 127.7 (q, *J* = 286.2 Hz), 125.6, 124.3, 123.8, 121.1, 112.0, 111.1, 76.8 (q, *J* = 30.8 Hz), 21.7, -1.4. **<sup>19</sup>F NMR** (376 MHz, CDCl<sub>3</sub>) δ: -78.29. IR (ATR)  $\nu_{max}$ : 3413, 2961, 1257, 1167, 841, 746 cm<sup>-1</sup>. **HRMS** (ESI): *m/z* calcd. for C<sub>16</sub>H<sub>20</sub>NOF<sub>3</sub>Si [M-H]<sup>-</sup>: 326.1193; found: 326.1186.

(*E*)-1,1,1-trifluoro-2-(5-methoxy-1*H*-indol-3-yl)-4-(trimethylsilyl)but-3-en-2-ol (**1x**)

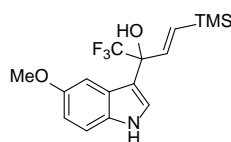

light brown solid, 87% yield. M.p. 160.9-161.8 °C. **<sup>1</sup>H NMR** (500 MHz, CDCl<sub>3</sub>) δ: 8.02 (s, 1H), 7.08 (s, 3H), 6.73 (s, 1H), 6.34 (d, *J* = 17.9 Hz, 1H), 6.24 (d, *J* = 17.8 Hz, 1H), 3.67 (s, 3H), 2.54 (s, 1H), -0.03 (s, 9H). **<sup>13</sup>C NMR** (126 MHz, CDCl<sub>3</sub>) δ: 154.3, 140.5, 134.2, 131.6, 127.7 (q, *J* = 286.8 Hz), 125.9, 124.2, 113.3, 112.3, 112.1, 103.0, 76.8 (q, *J* = 30.8 Hz), 55.9, -1.3. **<sup>19</sup>F NMR** (471 MHz, CDCl<sub>3</sub>) δ: -78.35. IR (ATR)  $\nu_{max}$ : 3413, 2953, 1247, 1157, 841, 746 cm<sup>-1</sup>. **HRMS** (ESI): *m/z* calcd. for C<sub>16</sub>H<sub>20</sub>NO<sub>2</sub>F<sub>3</sub>Si [M-H]<sup>-</sup>: 342.1143 found: 342.1134.

(*E*)-1,1,1-trifluoro-2-(6-fluoro-1*H*-indol-3-yl)-4-(trimethylsilyl)but-3-en-2-ol (**1y**)

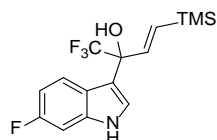

light brown solid, 80% yield. M.p. 97.8-98.4 °C. **<sup>1</sup>H NMR** (500 MHz, CDCl<sub>3</sub>) δ: 8.27 (s, 1H), 7.73 (dd, *J* = 7.3, 5.7 Hz, 1H), 7.20 (s, 1H), 7.06-6.78 (m, 2H), 6.54 (d, *J* = 18.8 Hz, 1H), 6.40 (d, *J* = 18.8 Hz, 1H), 2.85 (s, 1H), 0.15 (s, 9H). **<sup>13</sup>C NMR** (126 MHz, CDCl<sub>3</sub>) δ: 160.1 (d, *J* = 238.8 Hz), 140.4, 136.5 (d, *J* = 12.3 Hz), 134.5, 127.6 (q, *J* = 286.1 Hz), 124.2, 122.4 (d, *J* = 9.8 Hz), 121.9, 112.6, 109.2 (d, *J* = 24.3 Hz), 97.7 (d, *J* = 25.9 Hz), 76.8 (q, *J* = 29.1 Hz), -1.5. **<sup>19</sup>F NMR** (471 MHz, CDCl<sub>3</sub>) δ: -78.39, -120.33. IR (ATR)  $\nu_{max}$ : 3417, 2954, 1253, 1161, 844, 746

cm<sup>-1</sup>. **HRMS** (ESI): *m/z* calcd. for C<sub>15</sub>H<sub>17</sub>NOF<sub>4</sub>Si [M-H]<sup>-</sup>: 330.0943; found: 330.0936.

(*E*)-2-(6-chloro-1*H*-indol-3-yl)-1,1,1-trifluoro-4-(trimethylsilyl)but-3-en-2-ol (**1z**)

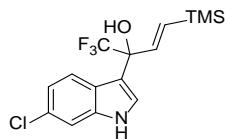

light brown solid, 83% yield. M.p. 101.4-102.1 °C. **<sup>1</sup>H NMR** (500 MHz, CDCl<sub>3</sub>) δ: 8.13 (s, 1H), 7.57 (d, *J* = 8.6 Hz, 1H), 7.10 (d, *J* = 28.4 Hz, 2H), 6.99 (d, *J* = 8.6 Hz, 1H), 6.40 (d, *J* = 18.8 Hz, 1H), 6.26 (d, *J* = 18.8 Hz, 1H), 2.73 (s, 1H), 0.01 (s, 9H). **<sup>13</sup>C NMR** (126 MHz, CDCl<sub>3</sub>) δ: 140.2, 136.8, 134.7, 128.5, 125.3 (q, *J* = 286.1 Hz), 124.5, 123.9, 122.4, 121.0, 112.6, 111.4, 76.7 (q, *J* = 29.7 Hz), -1.5. **<sup>19</sup>F NMR** (471 MHz, CDCl<sub>3</sub>) δ: -78.41. IR (ATR) *v*<sub>max</sub>: 3431, 2962, 1257, 1154, 848, 747 cm<sup>-1</sup>. **HRMS** (ESI): *m/z* calcd. for C<sub>15</sub>H<sub>17</sub>NOF<sub>3</sub>SiCl [M-H]<sup>-</sup>: 346.0647; found: 346.0641.

(*E*)-1,1,1-trifluoro-2-(6-methoxy-1*H*-indol-3-yl)-4-(trimethylsilyl)but-3-en-2-ol (**1aa**)

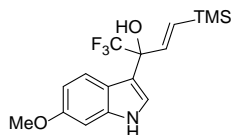

light brown solid, 83% yield. M.p. 171.5-172.4 °C. **<sup>1</sup>H NMR** (500 MHz, DMSO-*d*<sub>6</sub>) δ: 10.99 (s, 1H), 7.54 (d, *J* = 8.8 Hz, 1H), 7.20 (d, *J* = 2.0 Hz, 1H), 6.87 (d, *J* = 1.8 Hz, 1H), 6.65 (dd, *J* = 8.8, 1.9 Hz, 1H), 6.53 (t, *J* = 9.4 Hz, 2H), 6.29 (d, *J* = 18.7 Hz, 1H), 3.75 (s, 3H), 0.10 (s, 9H). **<sup>13</sup>C NMR** (126 MHz, DMSO-*d*<sub>6</sub>) δ: 155.4, 142.0, 137.2, 131.5, 125.8 (q, *J* = 287.0 Hz), 123.1, 121.8, 119.7, 112.1, 109.2, 94.3, 75.6 (q, *J* = 28.7 Hz), 55.1, -1.3. **<sup>19</sup>F NMR** (471 MHz, DMSO-*d*<sub>6</sub>) δ: -77.09. IR (ATR) *v*<sub>max</sub>: 3409, 2955, 1247, 1157, 832, 740 cm<sup>-1</sup>. **HRMS** (ESI): *m/z* calcd. for C<sub>16</sub>H<sub>20</sub>NO<sub>2</sub>F<sub>3</sub>Si [M-H]<sup>-</sup>: 342.1143; found: 342.1136.

1,1,1-trifluoro-2-(1*H*-indol-3-yl)-4-(triisopropylsilyl)but-3-yn-2-ol (**1ab**)

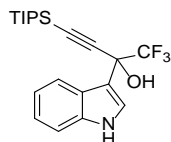

light brown solid, 87% yield. M.p. 104.3-105.0 °C. **<sup>1</sup>H NMR** (500 MHz, DMSO-*d*<sub>6</sub>) δ: 11.31 (s, 1H), 7.85 (s, 1H), 7.42 (d, *J* = 14.4 Hz, 3H), 7.06 (d, *J* = 53.8 Hz, 2H), 1.10 (s, 21H). **<sup>13</sup>C NMR** (126 MHz, DMSO-*d*<sub>6</sub>) δ: 136.6, 125.4, 124.8, 124.4 (q, *J* = 286.0 Hz), 121.4, 120.8, 119.0, 111.7, 111.0, 104.2, 86.6, 69.5 (q, *J* = 32.7 Hz), 18.4, 10.6. **<sup>19</sup>F NMR** (471 MHz, DMSO-*d*<sub>6</sub>) δ: -79.19. IR (ATR) *v*<sub>max</sub>: 3411, 2944, 2866, 1459, 1176, 744 cm<sup>-1</sup>. **HRMS** (ESI): *m/z* calcd. for C<sub>21</sub>H<sub>28</sub>NOF<sub>3</sub>Si [M-H]<sup>-</sup>: 394.1819; found: 394.1814.

1,1,1-trifluoro-2-(1*H*-indol-3-yl)hexan-2-ol (**1ac**)

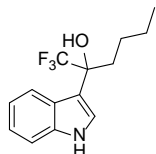

yellow oil, 93% yield. **<sup>1</sup>H NMR** (400 MHz, CDCl<sub>3</sub>) δ: 8.24 (s, 1H), 7.86 (d, *J* = 8.0 Hz, 1H), 7.38 (d, *J* = 8.1 Hz, 1H), 7.25 (dd, *J* = 6.1, 1.7 Hz, 2H), 7.20-7.12 (m, 1H), 2.55 (s, 1H), 2.46-2.26 (m, 1H), 2.17-1.93 (m, 1H), 1.45-1.11 (m, 4H), 0.86 (t, *J* = 7.2 Hz, 3H). **<sup>13</sup>C NMR** (126 MHz, CDCl<sub>3</sub>) δ: 136.7, 126.3 (q, *J* = 285.9 Hz), 125.4, 123.8, 122.4, 121.0, 120.3, 112.8, 111.6, 76.9 (q, *J* = 29.2 Hz), 34.7, 25.0, 23.0, 14.0. **<sup>19</sup>F NMR** (376 MHz,

CDCl<sub>3</sub>)  $\delta$ : -80.31. IR (ATR)  $\nu_{max}$ : 3415, 2946, 2864, 1456, 1168, 743 cm<sup>-1</sup>. HRMS (ESI):  $m/z$  calcd. for C<sub>14</sub>H<sub>16</sub>NOF<sub>3</sub> [M-H]<sup>-</sup>: 270.1111; found: 270.1108.

1,1,1-trifluoro-2-(1*H*-indol-3-yl)pent-4-en-2-ol (**1ad**)

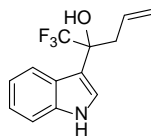

yellow oil, 80% yield. <sup>1</sup>H NMR (400 MHz, CDCl<sub>3</sub>)  $\delta$ : 8.24 (s, 1H), 7.88 (d,  $J$  = 8.0 Hz, 1H), 7.38 (d,  $J$  = 8.1 Hz, 1H), 7.31-7.21 (m, 2H), 7.18 (dd,  $J$  = 11.1, 4.0 Hz, 1H), 5.88-5.53 (m, 1H), 5.42-5.00 (m, 2H), 3.17 (d,  $J$  = 6.5 Hz, 1H), 2.92 (dd,  $J$  = 14.2, 8.1 Hz, 1H), 2.75 (s, 1H). <sup>13</sup>C NMR (126 MHz, CDCl<sub>3</sub>)  $\delta$ : 136.7, 131.2, 127.1 (q,  $J$  = 285.6 Hz), 125.3, 124.1, 122.5, 121.4, 121.1, 120.4, 113.0, 111.6, 75.3 (q,  $J$  = 29.6 Hz), 39.8. <sup>19</sup>F NMR (376 MHz, CDCl<sub>3</sub>)  $\delta$ : -79.73. IR (ATR)  $\nu_{max}$ : 3409, 2937, 2862, 1455, 1171, 743 cm<sup>-1</sup>. HRMS (ESI):  $m/z$  calcd. for C<sub>13</sub>H<sub>12</sub>NOF<sub>3</sub> [M-H]<sup>-</sup>: 254.0798; found: 254.0792.

1,1,1-trifluoro-2-(1*H*-indol-3-yl)-4-phenylbut-3-yn-2-ol (**1ae**)

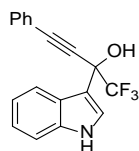

light brown solid, 88% yield. M.p. 131.7-132.3 °C. <sup>1</sup>H NMR (400 MHz, CDCl<sub>3</sub>)  $\delta$ : 8.25 (s, 1H), 8.03 (d,  $J$  = 7.9 Hz, 1H), 7.52 (t,  $J$  = 5.4 Hz, 3H), 7.43-7.32 (m, 4H), 7.26-7.16 (m, 2H), 3.16 (s, 1H). <sup>13</sup>C NMR (101 MHz, CDCl<sub>3</sub>)  $\delta$ : 136.7, 132.2, 129.5, 128.6, 128.6, 125.0, 124.1 (q,  $J$  = 285.4 Hz), 122.8, 121.3, 121.2, 120.7, 111.7, 111.5, 87.3, 84.7, 71.2 (q,  $J$  = 34.3 Hz). <sup>19</sup>F NMR (376 MHz, CDCl<sub>3</sub>)  $\delta$ : -79.92. IR (ATR)  $\nu_{max}$ : 3408, 2232, 1172, 745, 689 cm<sup>-1</sup>. HRMS (ESI):  $m/z$  calcd. for C<sub>18</sub>H<sub>11</sub>NOF<sub>3</sub> [M-H]<sup>-</sup>: 314.0798; found: 314.0794.

1,1,1-trifluoro-2-(4-fluoro-1*H*-indol-3-yl)-4-phenylbut-3-yn-2-ol (**1af**)

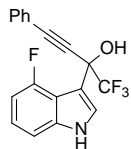

light brown solid, 50% yield. M.p. 141.4-142.7 °C. <sup>1</sup>H NMR (500 MHz, DMSO-d<sub>6</sub>)  $\delta$ : 11.64 (s, 1H), 7.62 (d,  $J$  = 2.6 Hz, 1H), 7.58 (s, 1H), 7.51 (dd,  $J$  = 7.4, 2.1 Hz, 2H), 7.46-7.36 (m, 3H), 7.28 (d,  $J$  = 8.1 Hz, 1H), 7.12 (td,  $J$  = 8.0, 4.7 Hz, 1H), 6.81 (dt,  $J$  = 16.1, 8.0 Hz, 1H). <sup>13</sup>C NMR (126 MHz, DMSO-d<sub>6</sub>)  $\delta$ : 156.2, 154.2, 139.9 (d,  $J$  = 10.9 Hz), 131.5, 129.3, 128.8, 126.4, 124.1 (q,  $J$  = 285.7 Hz), 122.2 (d,  $J$  = 7.9 Hz), 121.3, 113.4 (d,  $J$  = 19.7 Hz), 110.0 (d,  $J$  = 3.5 Hz), 108.3 (d,  $J$  = 3.5 Hz), 105.3, 105.2, 86.7, 84.9, 69.2 (q,  $J$  = 32.9 Hz). <sup>19</sup>F NMR (471 MHz, DMSO-d<sub>6</sub>)  $\delta$ : -78.75 (d,  $J$  = 14.5 Hz), -102.38--131.07 (m). IR (ATR)  $\nu_{max}$ : 3411, 2233, 1175, 744, 687 cm<sup>-1</sup>. HRMS (ESI):  $m/z$  calcd. for C<sub>18</sub>H<sub>11</sub>NOF<sub>4</sub> [M-H]<sup>-</sup>: 332.0704; found: 332.0699.

1,1-difluoro-2-(1*H*-indol-3-yl)-4-phenylbut-3-yn-2-ol (**1ag**)

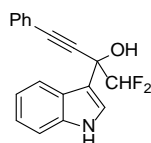

light brown solid, 55% yield. M.p. 113.5-114.3 °C. <sup>1</sup>H NMR (500 MHz, DMSO-d<sub>6</sub>)  $\delta$ : 11.23 (s, 1H), 7.87 (d,  $J$  = 8.0 Hz, 1H), 7.53 (dd,  $J$  = 6.5, 2.9 Hz, 2H), 7.49 (d,  $J$  = 2.5 Hz, 1H), 7.46-7.36 (m, 4H), 7.12 (t,  $J$  = 7.5 Hz, 1H),

7.03 (t,  $J = 7.5$  Hz, 1H), 6.95 (s, 1H), 6.19 (t,  $J = 56.1$  Hz, 1H).  **$^{13}\text{C}$  NMR** (126 MHz, DMSO- $d_6$ )  $\delta$ : 136.8, 131.5, 129.1, 128.8, 125.1, 124.7, 121.7, 121.3, 120.5, 119.0, 115.2 (t,  $J = 250.2$  Hz), 112.7, 111.7, 87.9, 85.1, 69.4 (t,  $J = 24.0$  Hz).  **$^{19}\text{F}$  NMR** (471 MHz, DMSO- $d_6$ )  $\delta$ : -124.95 (d,  $J = 55.9$  Hz), -125.66 (dd,  $J = 130.6, 56.2$  Hz), -126.36 (d,  $J = 56.4$  Hz). IR (ATR)  $\nu_{max}$ : 3409, 2234, 1070, 745, 690  $\text{cm}^{-1}$ . **HRMS** (ESI):  $m/z$  calcd. for  $\text{C}_{18}\text{H}_{13}\text{NOF}_2$  [M-H] $^-$ : 296.0892; found: 296.08922.

## 4. Experimental Procedure and Characterization of Products

### a. General Procedure to Prepare Racemic Products 3a~3an

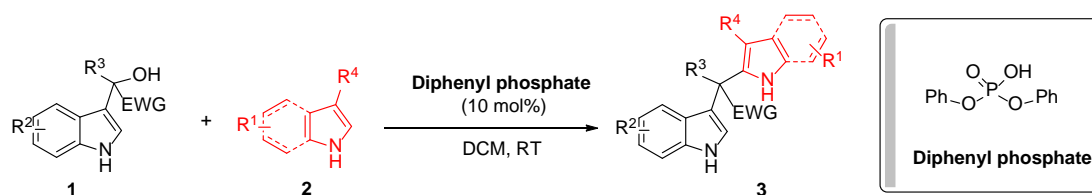

To a solution of α-indolyl propargylic alcohol **1** (0.10 mmol, 1.0 equiv.), and catalyst diphenyl phosphate (0.01 mmol, 10 mol%) in DCM (2 mL) was added indole **2** (0.12 mmol, 1.2 equiv.). The mixture was stirred at room temperature until the reaction was completed (monitored by TLC analysis). The crude product was purified directly by flash column chromatography on silica gel (petroleum ether/ ethyl acetate = 20:1~5:1) to give the desired racemic products **3a-3an**.

### b. General Procedure to Prepare Enantioenriched Products 3a-3an

#### Conditions A:

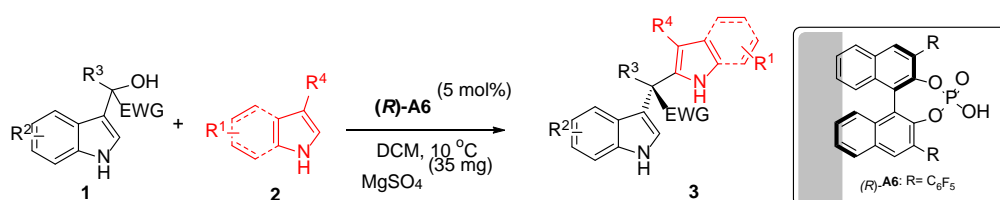

To a solution of α-indolyl propargylic alcohol **1** (0.10 mmol, 1.0 equiv.),  $\text{MgSO}_4$  (35 mg), and catalyst (*R*)-**A6** (0.005 mmol, 5 mol%) in DCM (3 mL) was added indole **2** (0.1 mmol, 1 equiv.). The mixture was stirred at 10 °C until the reaction was completed (monitored by TLC analysis). The crude product was purified directly by flash column chromatography on silica gel (petroleum ether/ ethyl acetate = 20:1~5:1) to give the desired chiral products **3a-3s**, **3al-3am**.

#### Conditions B:

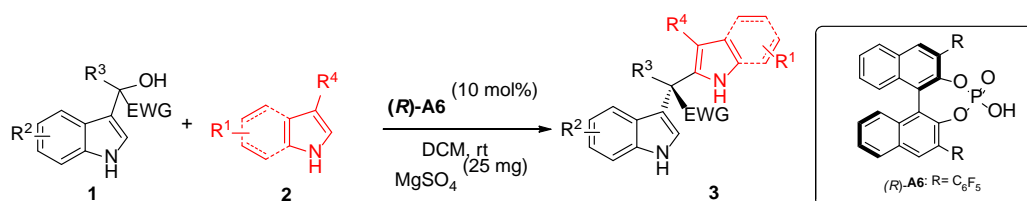

To a solution of α-indolyl propargylic alcohol **1** (0.10 mmol, 1.0 equiv.),  $\text{MgSO}_4$  (25 mg), and catalyst (*R*)-**A6** (0.01 mmol, 10 mol%) in DCM (1 mL) was added indole **2** (0.12 mmol, 1.2 equiv.). The mixture was stirred at room temperature until the reaction was completed (monitored by TLC analysis). The crude product was purified directly by flash column chromatography on silica gel (petroleum ether/ ethyl acetate = 20:1~5:1) to give the desired chiral products **3t-3ak**, **3an**.

#### Conditions C:

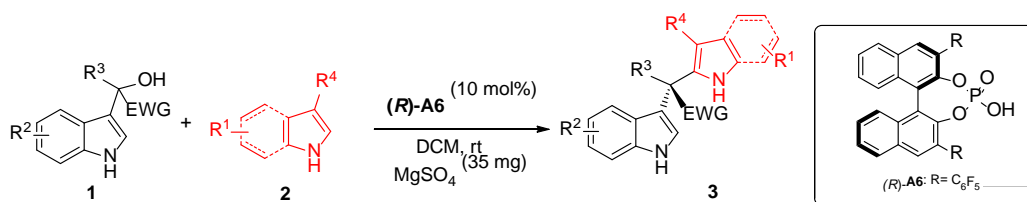

To a solution of  $\alpha$ -indolyl propargylic alcohol **1** (0.10 mmol, 1.0 equiv.),  $\text{MgSO}_4$  (35 mg), and catalyst (*R*)-**A6** (0.01 mmol, 10 mol%) in DCM (3 mL) was added indole **2** (0.10 mmol, 1.0 equiv.). The mixture was stirred at room temperature until the reaction was completed (monitored by TLC analysis). The crude product was purified directly by flash column chromatography on silica gel (petroleum ether/ ethyl acetate = 20:1~5:1) to give the desired chiral products **3p~3q**.

### c. Analytical Data for Products **3a~3an**

(*R*)-3-methyl-2-(1,1,1-trifluoro-2-(1*H*-indol-3-yl)-5,5-dimethylhex-3-yn-2-yl)-1*H*-indole (**3a**)

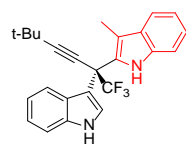

colorless oil, 5 d, 92% yield, 96:4 *er*,  $[\alpha]_D^{20} = +77.50$  ( $c = 0.16$ , MeOH). **<sup>1</sup>H NMR** (500 MHz,  $\text{CDCl}_3$ )  $\delta$ : 8.13 (s, 1H), 8.08 (s, 1H), 7.55 (d,  $J = 7.8$  Hz, 1H), 7.36 (dd,  $J = 26.2, 5.7$  Hz, 3H), 7.25 (d,  $J = 7.7$  Hz, 1H), 7.18 (t,  $J = 7.5$  Hz, 2H), 7.11 (t,  $J = 7.4$  Hz, 1H), 6.96 (t,  $J = 7.6$  Hz, 1H), 2.20 (s, 3H), 1.27 (s, 9H). **<sup>13</sup>C NMR** (126 MHz,  $\text{CDCl}_3$ )  $\delta$ : 136.4, 134.4, 130.0, 127.0, 125.9 (q,  $J = 284.8$  Hz), 125.8, 122.8 (d,  $J = 2.1$  Hz), 122.7, 122.5, 121.0, 120.1, 119.3, 119.0, 111.8, 111.3, 111.1, 110.9, 95.0, 73.9, 46.9 (q,  $J = 30.7$  Hz), 30.7, 27.9, 9.3. **<sup>19</sup>F NMR** (471 MHz,  $\text{CDCl}_3$ )  $\delta$ : -70.84. IR (ATR)  $\nu_{\text{max}}$ : 3409, 2967, 2856, 1477, 1443, 1159, 740  $\text{cm}^{-1}$ . **HRMS** (ESI):  $m/z$  calcd. for  $\text{C}_{25}\text{H}_{23}\text{N}_2\text{F}_3$   $[\text{M}+\text{H}]^+$ : 409.1886; found: 409.1887. **HPLC analysis**: The enantiomeric excess was determined by HPLC with Chiralpak IA column (hexane/*i*-PrOH = 90/10, flow rate 1  $\text{mL}\cdot\text{min}^{-1}$ ,  $\lambda = 254$  nm):  $t_{\text{major}} = 6.0$  min,  $t_{\text{minor}} = 6.8$  min.

(*R*)-4-fluoro-3-methyl-2-(1,1,1-trifluoro-2-(1*H*-indol-3-yl)-5,5-dimethylhex-3-yn-2-yl)-1*H*-indole (**3b**)

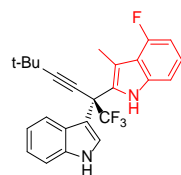

colorless oil, 12 d, 62% yield, 87:13 *er*,  $[\alpha]_D^{20} = +35.71$  ( $c = 0.14$ , MeOH). **<sup>1</sup>H NMR** (500 MHz,  $\text{CDCl}_3$ )  $\delta$ : 8.21 (s, 1H), 8.12 (s, 1H), 7.40 (d,  $J = 8.2$  Hz, 1H), 7.36 (d,  $J = 8.0$  Hz, 2H), 7.20 (t,  $J = 7.6$  Hz, 1H), 7.07-6.92 (m, 3H), 6.70 (dd,  $J = 11.4, 7.5$  Hz, 1H), 2.34 (s, 3H), 1.27 (s, 9H). **<sup>13</sup>C NMR** (126 MHz,  $\text{CDCl}_3$ )  $\delta$ : 157.8 (d,  $J = 247.7$  Hz), 136.9 (d,  $J = 11.3$  Hz), 136.4, 126.9, 125.9 (q,  $J = 284.7$  Hz), 125.7, 122.9 (d,  $J = 3.1$  Hz), 122.9, 122.8 (d,  $J = 8.1$  Hz), 120.8, 120.2, 118.6 (d,  $J = 18.0$  Hz), 111.3, 110.9, 110.8 (d,  $J = 3.2$  Hz), 107.1 (d,  $J = 3.6$  Hz), 104.7 (d,  $J = 19.7$  Hz), 95.2, 73.65, 46.8 (q,  $J = 31.1$  Hz), 30.7, 27.9, 11.0. **<sup>19</sup>F NMR** (471 MHz,  $\text{CDCl}_3$ )  $\delta$ : -70.88, -124.49. IR (ATR)  $\nu_{\text{max}}$ : 3449, 2960, 2811, 1477, 1451, 1159, 739  $\text{cm}^{-1}$ . **HRMS** (ESI):  $m/z$  calcd. for  $\text{C}_{25}\text{H}_{22}\text{N}_2\text{F}_4$   $[\text{M}-\text{H}]^-$ : 425.1646; found: 425.1648. **HPLC analysis**: The enantiomeric excess was determined by HPLC with Chiralpak IA column (hexane/*i*-PrOH = 95/5, flow rate 1  $\text{mL}\cdot\text{min}^{-1}$ ,  $\lambda = 245$  nm):  $t_{\text{major}} = 9.4$  min,  $t_{\text{minor}} = 10.7$  min.

(*R*)-5-fluoro-3-methyl-2-(1,1,1-trifluoro-2-(1*H*-indol-3-yl)-5,5-dimethylhex-3-yn-2-yl)-1*H*-indole (**3c**)

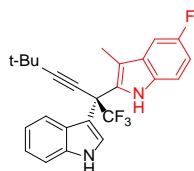

colorless oil, 7 d, 82% yield, 96:4 *er*,  $[a]_D^{20} = +70.03$  ( $c = 0.14$ , MeOH). **<sup>1</sup>H NMR** (500 MHz, CDCl<sub>3</sub>)  $\delta$ : 8.23 (s, 1H), 8.05 (s, 1H), 7.40 (d,  $J = 8.2$  Hz, 1H), 7.37 (s, 1H), 7.34 (d,  $J = 8.1$  Hz, 1H), 7.19 (t,  $J = 7.6$  Hz, 1H), 7.17-7.12 (m, 2H), 6.97 (t,  $J = 7.6$  Hz, 1H), 6.91 (td,  $J = 9.1, 2.4$  Hz, 1H), 2.14 (s, 3H), 1.27 (s, 9H). **<sup>13</sup>C NMR** (126 MHz, CDCl<sub>3</sub>)  $\delta$ : 157.8 (d,  $J = 234.4$  Hz), 136.4, 130.8, 130.3 (d,  $J = 9.4$  Hz), 128.8, 125.9 (q,  $J = 284.8$  Hz), 125.7, 122.9 (d,  $J = 2.6$  Hz), 122.8 (d,  $J = 4.6$  Hz), 120.8, 120.2, 112.0 (d,  $J = 4.9$  Hz), 111.6 (d,  $J = 9.5$  Hz), 111.3, 111.0 (d,  $J = 4.5$  Hz), 110.8, 103.8 (d,  $J = 23.2$  Hz), 95.2, 73.7, 46.9 (q,  $J = 30.8$  Hz), 30.7, 27.9, 9.4. **<sup>19</sup>F NMR** (471 MHz, CDCl<sub>3</sub>)  $\delta$ : -70.86, -124.81 (td,  $J = 9.5, 4.3$  Hz). IR (ATR)  $\nu_{max}$ : 3443, 2967, 2824, 1468, 1433, 1177, 743 cm<sup>-1</sup>. **HRMS** (ESI):  $m/z$  calcd. for C<sub>25</sub>H<sub>22</sub>N<sub>2</sub>F<sub>4</sub> [M+H]<sup>+</sup>: 427.1792; found: 427.1786. **HPLC analysis**: The enantiomeric excess was determined by HPLC with Chiralpak IA column (hexane/*i*-PrOH = 90/10, flow rate 1 mL·min<sup>-1</sup>,  $\lambda = 245$  nm):  $t_{major} = 5.8$  min,  $t_{minor} = 6.8$  min.

(*R*)-5-chloro-3-methyl-2-(1,1,1-trifluoro-2-(1*H*-indol-3-yl)-5,5-dimethylhex-3-yn-2-yl)-1*H*-indole (**3d**)

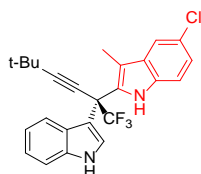

colorless oil, 7 d, 86% yield, 93:7 *er*,  $[a]_D^{20} = +75.83$  ( $c = 0.12$ , MeOH). **<sup>1</sup>H NMR** (500 MHz, CDCl<sub>3</sub>)  $\delta$ : 8.24 (s, 1H), 8.08 (s, 1H), 7.49 (d,  $J = 1.3$  Hz, 1H), 7.40 (d,  $J = 8.2$  Hz, 1H), 7.37 (s, 1H), 7.31 (d,  $J = 8.1$  Hz, 1H), 7.19 (t,  $J = 7.6$  Hz, 1H), 7.15 (d,  $J = 8.6$  Hz, 1H), 7.11 (dd,  $J = 8.6, 1.8$  Hz, 1H), 6.96 (t,  $J = 7.6$  Hz, 1H), 2.14 (s, 3H), 1.26 (s, 9H). **<sup>13</sup>C NMR** (126 MHz, CDCl<sub>3</sub>)  $\delta$ : 136.4, 132.6, 131.1, 128.5, 125.8 (q,  $J = 284.8$  Hz), 125.7, 125.1, 122.8, 122.8, 122.8, 120.8, 120.2, 118.6, 112.0, 111.6, 111.3, 110.9, 95.3, 73.6, 46.9 (q,  $J = 30.8$  Hz), 30.7, 27.9, 9.3. **<sup>19</sup>F NMR** (471 MHz, CDCl<sub>3</sub>)  $\delta$ : -70.89. IR (ATR)  $\nu_{max}$ : 3437, 2954, 2809, 1507, 1487, 1174, 751 cm<sup>-1</sup>. **HRMS** (ESI):  $m/z$  calcd. for C<sub>25</sub>H<sub>22</sub>N<sub>2</sub>F<sub>3</sub>Cl [M+H]<sup>+</sup>: 443.1496; found: 443.1493. **HPLC analysis**: The enantiomeric excess was determined by HPLC with Chiralpak IA column (hexane/*i*-PrOH = 90/10, flow rate 1 mL·min<sup>-1</sup>,  $\lambda = 254$  nm):  $t_{major} = 5.8$  min,  $t_{minor} = 7.2$  min.

(*R*)-5-bromo-3-methyl-2-(1,1,1-trifluoro-2-(1*H*-indol-3-yl)-5,5-dimethylhex-3-yn-2-yl)-1*H*-indole (**3e**)

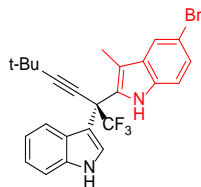

colorless oil, 7 d, 78% yield, 92:8 *er*,  $[a]_D^{20} = +61.82$  ( $c = 0.12$ , MeOH). **<sup>1</sup>H NMR** (500 MHz, CDCl<sub>3</sub>)  $\delta$ : 8.24 (s, 1H), 8.09 (s, 1H), 7.65 (s, 1H), 7.40 (d,  $J = 8.2$  Hz, 1H), 7.37 (s, 1H), 7.30 (d,  $J = 8.1$  Hz, 1H), 7.24 (d,  $J = 8.6$  Hz, 1H), 7.19 (t,  $J = 7.6$  Hz, 1H), 7.11 (d,  $J = 8.6$  Hz, 1H), 6.96 (t,  $J = 7.6$  Hz, 1H), 2.13 (s, 3H), 1.26 (s, 9H). **<sup>13</sup>C NMR** (126 MHz, CDCl<sub>3</sub>)  $\delta$ : 136.4, 132.9, 131.7, 128.3, 125.8 (q,  $J = 284.7$  Hz), 125.7, 125.3, 122.9, 122.8, 121.7, 120.8, 120.2, 112.6, 112.4, 111.6, 111.3, 110.9, 95.3, 73.6, 46.9 (q,  $J = 31.1$  Hz), 30.7, 27.9, 9.3. **<sup>19</sup>F NMR** (471 MHz, CDCl<sub>3</sub>)  $\delta$ : -70.89. IR (ATR)  $\nu_{max}$ : 3441, 2933, 2847, 1455, 1427, 1108, 746 cm<sup>-1</sup>. **HRMS** (ESI):  $m/z$  calcd. for C<sub>25</sub>H<sub>22</sub>N<sub>2</sub>F<sub>3</sub>Br [M+H]<sup>+</sup>: 487.0991; found: 487.0985. **HPLC analysis**: The enantiomeric excess



was determined by HPLC with Chiralpak IA column (hexane/*i*-PrOH = 90/10, flow rate 1 mL·min<sup>-1</sup>, λ = 254 nm):  $t_{\text{major}} = 5.9$  min,  $t_{\text{minor}} = 7.5$  min.

(*R*)-3,5-dimethyl-2-(1,1,1-trifluoro-2-(1*H*-indol-3-yl)-5,5-dimethylhex-3-yn-2-yl)-1*H*-indole (**3f**)

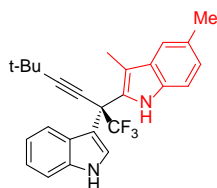

colorless oil, 5 d, 88% yield, 97:3 *er*,  $[a]_D^{20} = +88.82$  ( $c = 0.17$ , MeOH). **<sup>1</sup>H NMR** (500 MHz, CDCl<sub>3</sub>) δ: 8.16 (s, 1H), 7.99 (s, 1H), 7.37 (dd,  $J = 9.1, 0.8$  Hz, 2H), 7.33 (d,  $J = 4.2$  Hz, 2H), 7.19 (d,  $J = 7.9$  Hz, 1H), 7.17-7.12 (m, 1H), 7.01 (d,  $J = 8.3$  Hz, 1H), 6.95 (t,  $J = 7.6$  Hz, 1H), 2.46 (s, 3H), 2.16 (s, 3H), 1.27 (s, 9H). **<sup>13</sup>C NMR** (126 MHz, CDCl<sub>3</sub>) δ: 136.3, 132.7, 130.2, 128.6, 127.1, 125.8, 124.1, 123.7 (q,  $J = 285.0$  Hz), 122.8, 122.8, 122.7, 121.0, 120.1, 118.6, 111.3, 111.2, 110.6, 94.9, 74.0, 46.9 (q,  $J = 31.0$  Hz), 30.7, 27.9, 21.6, 9.3. **<sup>19</sup>F NMR** (471 MHz, CDCl<sub>3</sub>) δ: -70.89. IR (ATR)  $\nu_{\text{max}}$ : 3450, 2937, 2724, 1509, 1411, 1113, 734 cm<sup>-1</sup>. **HRMS** (ESI):  $m/z$  calcd. for C<sub>26</sub>H<sub>25</sub>N<sub>2</sub>F<sub>3</sub> [M+H]<sup>+</sup>: 423.2043; found: 423.2051. **HPLC analysis**: The enantiomeric excess was determined by HPLC with Chiralpak IA column (hexane/*i*-PrOH = 90/10, flow rate 1 mL·min<sup>-1</sup>, λ = 254 nm):  $t_{\text{major}} = 5.3$  min,  $t_{\text{minor}} = 6.5$  min.

(*R*)-5-methoxy-3-methyl-2-(1,1,1-trifluoro-2-(1*H*-indol-3-yl)-5,5-dimethylhex-3-yn-2-yl)-1*H*-indole (**3g**)

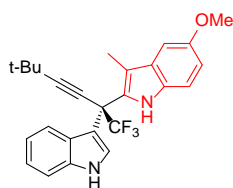

colorless oil, 5 d, 96% yield, 98:2 *er*,  $[a]_D^{20} = +83.50$  ( $c = 0.20$ , MeOH). **<sup>1</sup>H NMR** (500 MHz, CDCl<sub>3</sub>) δ: 8.21 (s, 1H), 7.98 (s, 1H), 7.37 (dd,  $J = 8.0, 3.2$  Hz, 2H), 7.34 (s, 1H), 7.19 (dd,  $J = 11.5, 4.4$  Hz, 1H), 7.15 (d,  $J = 8.8$  Hz, 1H), 7.00-6.93 (m, 2H), 6.85 (dd,  $J = 8.8, 2.4$  Hz, 1H), 3.86 (s, 3H), 2.17 (s, 3H), 1.27 (s, 9H). **<sup>13</sup>C NMR** (126 MHz, CDCl<sub>3</sub>) δ: 154.0, 136.4, 130.3, 129.6, 127.8, 125.9 (q,  $J = 284.6$  Hz), 125.8, 122.9 (d,  $J = 2.1$  Hz), 122.7, 121.0, 120.1, 112.9, 111.8, 111.5, 111.3, 111.1, 100.6, 94.9, 73.9, 56.1, 46.9 (q,  $J = 30.9$  Hz), 30.7, 27.9, 9.5. **<sup>19</sup>F NMR** (471 MHz, CDCl<sub>3</sub>) δ: -70.86. IR (ATR)  $\nu_{\text{max}}$ : 3408, 2968, 2866, 1484, 1457, 1167, 728 cm<sup>-1</sup>. **HRMS** (ESI):  $m/z$  calcd. for C<sub>26</sub>H<sub>25</sub>N<sub>2</sub>O<sub>2</sub>F<sub>3</sub> [M+H]<sup>+</sup>: 439.1992; found: 439.1997. **HPLC analysis**: The enantiomeric excess was determined by HPLC with Chiralpak IA column (hexane/*i*-PrOH = 90/10, flow rate 1 mL·min<sup>-1</sup>, λ = 245 nm):  $t_{\text{major}} = 6.2$  min,  $t_{\text{minor}} = 7.4$  min.

(*R*)-6-fluoro-3-methyl-2-(1,1,1-trifluoro-2-(1*H*-indol-3-yl)-5,5-dimethylhex-3-yn-2-yl)-1*H*-indole (**3h**)

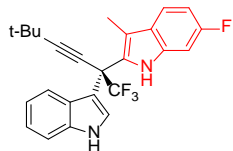

colorless oil, 7 d, 84% yield, 95.5:4.5 *er*,  $[a]_D^{20} = +77.86$  ( $c = 0.14$ , MeOH). **<sup>1</sup>H NMR** (500 MHz, CDCl<sub>3</sub>) δ: 8.19 (s, 1H), 8.03 (s, 1H), 7.44 (dd,  $J = 8.6, 5.3$  Hz, 1H), 7.40-7.34 (m, 3H), 7.20 (t,  $J = 7.6$  Hz, 1H), 6.98 (t,  $J = 7.6$  Hz, 1H), 6.92 (d,  $J = 9.6$  Hz, 1H), 6.87 (t,  $J = 9.2$  Hz, 1H), 2.18 (s, 3H), 1.27 (s, 9H). **<sup>13</sup>C NMR** (126 MHz, CDCl<sub>3</sub>) δ: 160.3 (d,  $J = 237.7$  Hz), 136.4, 134.1 (d,  $J = 12.6$  Hz), 127.1 (d,  $J = 3.7$  Hz), 126.6, 125.9 (q,  $J = 284.8$  Hz), 125.7, 122.81, 122.8 (d,  $J = 2.6$  Hz), 120.9, 120.2, 119.9 (d,  $J = 10.2$  Hz), 111.9, 111.3, 111.0, 108.1 (d,  $J = 24.5$

H), 97.2 (d,  $J = 26.1$  Hz), 95.1, 73.8, 46.8 (q,  $J = 30.8$  Hz), 30.7, 27.9, 9.3.  **$^{19}\text{F}$  NMR** (471 MHz,  $\text{CDCl}_3$ )  $\delta$ : -70.99, -120.66. IR (ATR)  $\nu_{\text{max}}$ : 3411, 2975, 2834, 1469, 1452, 1145, 735  $\text{cm}^{-1}$ . **HRMS** (ESI):  $m/z$  calcd. for  $\text{C}_{25}\text{H}_{22}\text{N}_2\text{F}_4$  [M-H] $^-$ : 425.1646; found: 425.1659. **HPLC analysis**: The enantiomeric excess was determined by HPLC with Chiralpak IA column (hexane/*i*-PrOH = 90/10, flow rate 1  $\text{mL}\cdot\text{min}^{-1}$ ,  $\lambda = 245$  nm):  $t_{\text{major}} = 5.9$  min,  $t_{\text{minor}} = 6.6$  min.

(*R*)-6-chloro-3-methyl-2-(1,1,1-trifluoro-2-(1*H*-indol-3-yl)-5,5-dimethylhex-3-yn-2-yl)-1*H*-indole (**3i**)

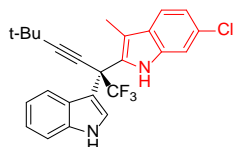

colorless oil, 7 d, 88% yield, 96:4 *er*,  $[\alpha]_D^{20} = +56.67$  ( $c = 0.18$ , MeOH).  **$^1\text{H}$  NMR** (500 MHz,  $\text{CDCl}_3$ )  $\delta$ : 8.23 (s, 1H), 8.05 (s, 1H), 7.42 (d,  $J = 8.5$  Hz, 1H), 7.41-7.34 (m, 2H), 7.32 (d,  $J = 8.1$  Hz, 1H), 7.24 (d,  $J = 1.7$  Hz, 1H), 7.19 (t,  $J = 7.6$  Hz, 1H), 7.06 (dd,  $J = 8.5, 1.2$  Hz, 1H), 6.96 (t,  $J = 7.6$  Hz, 1H), 2.15 (s, 3H), 1.27 (s, 9H).  **$^{13}\text{C}$  NMR** (126 MHz,  $\text{CDCl}_3$ )  $\delta$ : 136.4, 134.6, 128.6, 128.4, 127.6, 125.8 (q,  $J = 284.8$  Hz), 125.7, 122.8, 122.8, 122.8, 120.8, 120.2, 120.1, 111.0, 112.0, 111.3, 110.9, 95.2, 73.7, 46.9 (q,  $J = 30.9$  Hz), 30.7, 27.9, 9.3.  **$^{19}\text{F}$  NMR** (471 MHz,  $\text{CDCl}_3$ )  $\delta$ : -70.94. **HRMS** (ESI):  $m/z$  calcd. for  $\text{C}_{25}\text{H}_{22}\text{N}_2\text{F}_3\text{Cl}$  [M+H] $^+$ : 443.1496; found: 443.1491. IR (ATR)  $\nu_{\text{max}}$ : 3437, 2919, 2858, 1449, 1416, 1178, 744  $\text{cm}^{-1}$ . **HPLC analysis**: The enantiomeric excess was determined by HPLC with Chiralpak IA column (hexane/*i*-PrOH = 90/10, flow rate 1  $\text{mL}\cdot\text{min}^{-1}$ ,  $\lambda = 254$  nm):  $t_{\text{major}} = 6.2$  min,  $t_{\text{minor}} = 6.5$  min.

(*R*)-6-methoxy-3-methyl-2-(1,1,1-trifluoro-2-(1*H*-indol-3-yl)-5,5-dimethylhex-3-yn-2-yl)-1*H*-indole (**3j**)

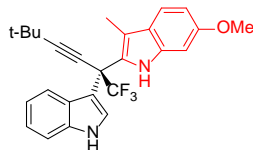

colorless oil, 4 d, 98% yield, 95:5 *er*,  $[\alpha]_D^{20} = +52.50$  ( $c = 0.40$ , MeOH).  **$^1\text{H}$  NMR** (500 MHz,  $\text{CDCl}_3$ )  $\delta$ : 8.16 (s, 1H), 7.95 (s, 1H), 7.41 (d,  $J = 8.5$  Hz, 2H), 7.36 (d,  $J = 8.2$  Hz, 1H), 7.33 (s, 1H), 7.19 (t,  $J = 7.5$  Hz, 1H), 6.98 (t,  $J = 7.5$  Hz, 1H), 6.78 (d,  $J = 8.7$  Hz, 1H), 6.74 (s, 1H), 3.81 (s, 3H), 2.18 (s, 3H), 1.27 (s, 9H).  **$^{13}\text{C}$  NMR** (126 MHz,  $\text{CDCl}_3$ )  $\delta$ : 156.9, 136.4, 135.0, 126.0 (q,  $J = 284.7$  Hz), 125.8, 125.4, 124.4, 122.7, 121.0, 120.1, 119.7, 111.8, 111.3, 111.2, 109.6, 94.8, 94.2, 74.0, 55.8, 46.8 (q,  $J = 30.8$  Hz), 30.7, 27.9, 9.4.  **$^{19}\text{F}$  NMR** (471 MHz,  $\text{CDCl}_3$ )  $\delta$ : -71.03. IR (ATR)  $\nu_{\text{max}}$ : 3415, 2937, 2855, 1436, 1417, 1149, 738  $\text{cm}^{-1}$ . **HRMS** (ESI):  $m/z$  calcd. for  $\text{C}_{26}\text{H}_{25}\text{N}_2\text{OF}_3$  [M-H] $^-$ : 437.1846; found: 437.1841. **HPLC analysis**: The enantiomeric excess was determined by HPLC with Chiralpak IA column (hexane/*i*-PrOH = 90/10, flow rate 1  $\text{mL}\cdot\text{min}^{-1}$ ,  $\lambda = 245$  nm):  $t_{\text{major}} = 7.7$  min,  $t_{\text{minor}} = 9.3$  min.

(*R*)-5-methoxy-3-methyl-2-(1,1,1-trifluoro-2-(5-fluoro-1*H*-indol-3-yl)-5,5-dimethylhex-3-yn-2-yl)-1*H*-indole (**3k**)

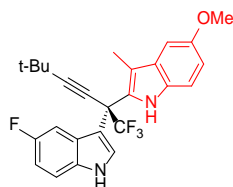

colorless oil, 4 d, 86% yield, 97:3 *er*,  $[\alpha]_D^{20} = +21.33$  ( $c = 0.15$ , MeOH).  **$^1\text{H}$  NMR** (500 MHz,  $\text{CDCl}_3$ )  $\delta$ : 8.23 (s, 1H), 7.97 (s, 1H), 7.35 (s, 1H), 7.26 (dd,  $J = 9.0, 4.5$  Hz, 1H), 7.17 (d,  $J = 8.8$  Hz, 1H), 7.05 (d,  $J = 9.3$  Hz, 1H), 6.96 (s, 1H), 6.95-6.89 (m, 1H), 6.86 (d,  $J = 8.8$  Hz, 1H), 3.85 (s, 3H), 2.12 (s, 3H), 1.27 (s, 9H).  **$^{13}\text{C}$  NMR** (126

MHz, CDCl<sub>3</sub>)  $\delta$ : 157.7 (d,  $J$  = 235.2 Hz), 154.1, 132.9, 130.2, 129.6, 127.3, 126.3 (d,  $J$  = 10.4 Hz), 125.8 (q,  $J$  = 284.8 Hz), 124.5 (d,  $J$  = 2.4 Hz), 113.1, 112.0 (d,  $J$  = 9.8 Hz), 111.8, 111.5 (d,  $J$  = 10.4 Hz), 111.4 (d,  $J$  = 4.8 Hz), 111.3, 105.9 (d,  $J$  = 24.8 Hz), 100.7, 95.3, 73.6, 56.1, 46.8 (q,  $J$  = 30.9 Hz), 30.7, 27.9, 9.4. **<sup>19</sup>F NMR** (471 MHz, CDCl<sub>3</sub>)  $\delta$ : -70.92, -123.27. IR (ATR)  $\nu_{max}$ : 3407, 2952, 1472, 1441, 1165, 742 cm<sup>-1</sup>. **HRMS** (ESI):  $m/z$  calcd. for C<sub>26</sub>H<sub>24</sub>N<sub>2</sub>O<sub>4</sub> [M+H]<sup>+</sup>: 457.1898; found: 457.1896. **HPLC analysis**: The enantiomeric excess was determined by HPLC with Chiralpak IA column (hexane/*i*-PrOH = 97/3, flow rate 1 mL·min<sup>-1</sup>,  $\lambda$  = 254 nm):  $t_{major}$  = 24.2 min,  $t_{minor}$  = 31.5 min.

(*R*)-2-(2-(5-chloro-1*H*-indol-3-yl)-1,1,1-trifluoro-5,5-dimethylhex-3-yn-2-yl)-5-methoxy-3-methyl-1*H*-indole (**3l**)

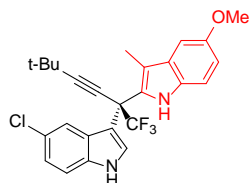

colorless oil, 3 d, 94% yield, 97:3 *er*,  $[a]_D^{20}$  = +39.44 (c = 0.18, MeOH). **<sup>1</sup>H NMR** (500 MHz, CDCl<sub>3</sub>)  $\delta$ : 8.27 (s, 1H), 7.93 (s, 1H), 7.50 (d,  $J$  = 1.5 Hz, 1H), 7.33 (s, 1H), 7.29 (d,  $J$  = 8.7 Hz, 1H), 7.17 (d,  $J$  = 8.8 Hz, 1H), 7.14 (dd,  $J$  = 8.7, 1.9 Hz, 1H), 6.97 (d,  $J$  = 2.2 Hz, 1H), 6.86 (dd,  $J$  = 8.8, 2.4 Hz, 1H), 3.86 (s, 3H), 2.16 (s, 3H), 1.29 (s, 9H). **<sup>13</sup>C NMR** (126 MHz, CDCl<sub>3</sub>)  $\delta$ : 154.1, 134.8, 130.3, 129.6, 127.3, 126.9, 125.9, 124.2 (d,  $J$  = 2.0 Hz), 123.5 (q,  $J$  = 284.0 Hz), 123.2, 120.5, 113.1, 112.4, 111.8, 111.6, 111.0, 100.7, 95.4, 73.7, 56.1, 46.8 (q,  $J$  = 31.1 Hz), 30.7, 27.9, 9.5. **<sup>19</sup>F NMR** (471 MHz, CDCl<sub>3</sub>)  $\delta$ : -70.90. IR (ATR)  $\nu_{max}$ : 3431, 2980, 1477, 1468, 1164, 782 cm<sup>-1</sup>. **HRMS** (ESI):  $m/z$  calcd. for C<sub>26</sub>H<sub>24</sub>N<sub>2</sub>O<sub>3</sub>Cl [M+H]<sup>+</sup>: 473.1602; found: 473.1591. **HPLC analysis**: The enantiomeric excess was determined by HPLC with Chiralpak IA column (hexane/*i*-PrOH = 90/10, flow rate 1 mL·min<sup>-1</sup>,  $\lambda$  = 254 nm):  $t_{major}$  = 6.8 min,  $t_{minor}$  = 8.7 min.

(*R*)-2-(2-(5-bromo-1*H*-indol-3-yl)-1,1,1-trifluoro-5,5-dimethylhex-3-yn-2-yl)-5-methoxy-3-methyl-1*H*-indole (**3m**)

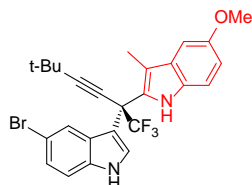

colorless oil, 4 d, 82% yield, 97:3 *er*,  $[a]_D^{20}$  = +53.85 (c = 0.13, MeOH). **<sup>1</sup>H NMR** (500 MHz, CDCl<sub>3</sub>)  $\delta$ : 8.24 (s, 1H), 7.89 (s, 1H), 7.66 (s, 1H), 7.26 (s, 1H), 7.23 (d,  $J$  = 4.7 Hz, 1H), 7.21 (d,  $J$  = 8.6 Hz, 1H), 7.14 (d,  $J$  = 8.8 Hz, 1H), 6.94 (s, 1H), 6.83 (dd,  $J$  = 8.8, 1.8 Hz, 1H), 3.83 (s, 3H), 2.15 (s, 3H), 1.26 (s, 9H). **<sup>13</sup>C NMR** (126 MHz, CDCl<sub>3</sub>)  $\delta$ : 154.1, 135.0, 130.3, 129.6, 127.5, 127.3, 125.8, 125.8 (q,  $J$  = 284.6 Hz), 124.0 (d,  $J$  = 2.5 Hz), 123.6, 113.5, 113.1, 112.8, 111.8, 111.6, 110.9, 100.7, 95.5, 73.6, 56.1, 46.8 (q,  $J$  = 31.0 Hz), 30.6, 27.9, 9.5. **<sup>19</sup>F NMR** (471 MHz, CDCl<sub>3</sub>)  $\delta$ : -70.87. IR (ATR)  $\nu_{max}$ : 3419, 2957, 1491, 1460, 1159, 786 cm<sup>-1</sup>. **HRMS** (ESI):  $m/z$  calcd. for C<sub>26</sub>H<sub>24</sub>N<sub>2</sub>O<sub>3</sub>Br [M+H]<sup>+</sup>: 517.1097; found: 517.1091. **HPLC analysis**: The enantiomeric excess was determined by HPLC with Chiralpak IA column (hexane/*i*-PrOH = 97/3, flow rate 1 mL·min<sup>-1</sup>,  $\lambda$  = 254 nm):  $t_{major}$  = 26.1 min,  $t_{minor}$  = 40.5 min.

(*R*)-5-methoxy-3-methyl-2-(1,1,1-trifluoro-5,5-dimethyl-2-(5-methyl-1*H*-indol-3-yl)hex-3-yn-2-yl)-1*H*-indole (**3n**)

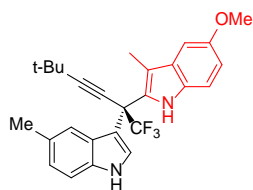

colorless oil, 4 d, 98% yield, 98:2 *er*,  $[a]_D^{20} = +78.50$  ( $c = 0.20$ , MeOH). **<sup>1</sup>H NMR** (500 MHz, CDCl<sub>3</sub>)  $\delta$ : 8.13 (s, 1H), 7.93 (s, 1H), 7.33 (s, 1H), 7.27 (dd,  $J = 7.6, 5.4$  Hz, 2H), 7.15 (d,  $J = 8.8$  Hz, 1H), 7.03 (dd,  $J = 9.3, 5.2$  Hz, 2H), 6.90-6.79 (m, 1H), 3.88 (s, 3H), 2.33 (s, 3H), 2.28 (s, 3H), 1.31 (s, 9H). **<sup>13</sup>C NMR** (126 MHz, CDCl<sub>3</sub>)  $\delta$ : 154.0, 134.8, 130.3, 129.6, 129.3, 128.0, 126.0, 126.0 (q,  $J = 284.8$  Hz), 124.4, 123.1 (d,  $J = 2.4$  Hz), 120.7, 112.8, 111.8, 111.4, 110.9, 110.3, 100.7, 94.8, 74.1, 56.1, 46.9 (q,  $J = 30.7$  Hz), 30.7, 27.9, 21.6, 9.6. **<sup>19</sup>F NMR** (471 MHz, CDCl<sub>3</sub>)  $\delta$ : -70.77. IR (ATR)  $\nu_{max}$ : 3413, 2968, 1486, 1457, 1171, 801 cm<sup>-1</sup>. **HRMS** (ESI):  $m/z$  calcd. for C<sub>27</sub>H<sub>27</sub>N<sub>2</sub>O<sub>F<sub>3</sub></sub> [M+H]<sup>+</sup>: 453.2148; found: 453.2146. **HPLC analysis**: The enantiomeric excess was determined by HPLC with Chiralpak IA column (hexane/*i*-PrOH = 90/10, flow rate 1 mL·min<sup>-1</sup>,  $\lambda = 254$  nm):  $t_{major} = 5.9$  min,  $t_{minor} = 8.1$  min.

(*R*)-5-methoxy-3-methyl-2-(1,1,1-trifluoro-2-(5-methoxy-1*H*-indol-3-yl)-5,5-dimethylhex-3-yn-2-yl)-1*H*-indole (**3o**)

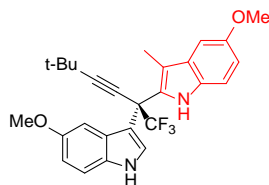

colorless oil, 3 d, 98% yield, 97:3 *er*,  $[a]_D^{20} = +64.71$  ( $c = 0.17$ , MeOH). **<sup>1</sup>H NMR** (400 MHz, CDCl<sub>3</sub>)  $\delta$ : 8.12 (s, 1H), 7.98 (s, 1H), 7.31 (s, 1H), 7.23 (dd,  $J = 9.2, 4.6$  Hz, 1H), 7.15 (d,  $J = 8.8$  Hz, 1H), 6.97 (d,  $J = 2.3$  Hz, 1H), 6.85 (dd,  $J = 2.3, 1.4$  Hz, 1H), 6.83 (dd,  $J = 2.2, 1.6$  Hz, 1H), 6.75 (d,  $J = 2.3$  Hz, 1H), 3.85 (s, 3H), 3.57 (s, 3H), 2.18 (s, 3H), 1.29 (s, 9H). **<sup>13</sup>C NMR** (126 MHz, CDCl<sub>3</sub>)  $\delta$ : 154.1, 154.0, 131.5, 130.3, 129.6, 127.7, 126.3, 126.0 (q,  $J = 284.5$  Hz), 123.7 (d,  $J = 2.5$  Hz), 113.1, 112.9, 112.0, 111.7, 111.5, 110.8, 102.5, 100.7, 94.8, 73.9, 56.1, 55.7, 46.9 (q,  $J = 30.8$  Hz), 30.8, 27.9, 9.5. **<sup>19</sup>F NMR** (376 MHz, CDCl<sub>3</sub>)  $\delta$ : -70.76. IR (ATR)  $\nu_{max}$ : 3401, 2957, 1464, 1434, 1169, 784 cm<sup>-1</sup>. **HRMS** (ESI):  $m/z$  calcd. for C<sub>27</sub>H<sub>27</sub>N<sub>2</sub>O<sub>2</sub>F<sub>3</sub> [M+H]<sup>+</sup>: 469.2097; found: 469.2110. **HPLC analysis**: The enantiomeric excess was determined by HPLC with Chiralpak IA column (hexane/*i*-PrOH = 90/10, flow rate 1 mL·min<sup>-1</sup>,  $\lambda = 254$  nm):  $t_{major} = 7.6$  min,  $t_{minor} = 10.5$  min.

(*R*)-5-methoxy-3-methyl-2-(1,1,1-trifluoro-2-(6-fluoro-1*H*-indol-3-yl)-5,5-dimethylhex-3-yn-2-yl)-1*H*-indole (**3p**)

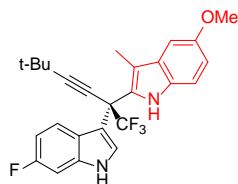

colorless oil, 26 d, 76% yield, 96.5:3.5 *er* (**Conditions A**); 3 d, 92% yield, 95:5 *er* (**Conditions C**),  $[a]_D^{20} = +78.98$  ( $c = 0.09$ , MeOH). **<sup>1</sup>H NMR** (500 MHz, CDCl<sub>3</sub>)  $\delta$ : 8.22 (s, 1H), 7.98 (s, 1H), 7.32 (s, 1H), 7.25 (dd,  $J = 8.3, 5.1$  Hz, 1H), 7.17 (d,  $J = 8.7$  Hz, 1H), 7.07-7.01 (m, 1H), 6.96 (s, 1H), 6.86 (d,  $J = 8.8$  Hz, 1H), 6.72 (t,  $J = 9.2$  Hz, 1H), 3.85 (s, 3H), 2.12 (s, 3H), 1.26 (s, 9H). **<sup>13</sup>C NMR** (126 MHz, CDCl<sub>3</sub>)  $\delta$ : 160.2 (d,  $J = 239.1$  Hz), 154.0, 136.3 (d,  $J = 12.3$  Hz), 130.2, 129.6, 127.5, 125.8 (q,  $J = 284.7$  Hz), 123.1, 122.3, 121.8 (d,  $J = 10.0$  Hz), 113.0, 111.8, 111.5 (d,  $J = 18.0$  Hz), 109.0 (d,  $J = 24.3$  Hz), 100.6, 97.5 (d,  $J = 26.1$  Hz), 95.1, 73.8, 56.1, 46.8 (q,  $J = 31.0$  Hz), 30.7, 27.9, 9.4. **<sup>19</sup>F NMR** (471 MHz, CDCl<sub>3</sub>)  $\delta$ : -70.99, -120.23. IR (ATR)  $\nu_{max}$ : 3428, 2949, 1476,

1437, 1129, 768  $\text{cm}^{-1}$ . **HRMS** (ESI):  $m/z$  calcd. for  $\text{C}_{26}\text{H}_{24}\text{N}_2\text{O}_4$   $[\text{M}+\text{H}]^+$ : 457.1898; found: 457.1910. **HPLC analysis**: The enantiomeric excess was determined by HPLC with Chiralpak IA column (hexane/*i*-PrOH = 90/10, flow rate 1  $\text{mL}\cdot\text{min}^{-1}$ ,  $\lambda$  = 245 nm):  $t_{\text{major}}$  = 6.2 min,  $t_{\text{minor}}$  = 6.9 min.

(*R*)-2-(2-(6-chloro-1*H*-indol-3-yl)-1,1,1-trifluoro-5,5-dimethylhex-3-yn-2-yl)-5-methoxy-3-methyl-1*H*-indole (**3q**)

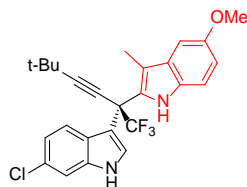

colorless oil, 30 d, 68% yield, 96:4 *er* (**Conditions A**); 3 d, 84% yield, 95:5 *er* (**Conditions C**),  $[\alpha]_D^{20}$  = +83.57 ( $c$  = 0.14, MeOH).  **$^1\text{H NMR}$**  (500 MHz,  $\text{CDCl}_3$ )  $\delta$ : 8.22 (s, 1H), 7.99 (s, 1H), 7.36 (d,  $J$  = 1.2 Hz, 1H), 7.33 (s, 1H), 7.23 (d,  $J$  = 8.6 Hz, 1H), 7.18 (d,  $J$  = 8.8 Hz, 1H), 6.96 (d,  $J$  = 2.1 Hz, 1H), 6.92 (dd,  $J$  = 8.6, 1.6 Hz, 1H), 6.86 (dd,  $J$  = 8.8, 2.4 Hz, 1H), 3.86 (s, 3H), 2.10 (s, 3H), 1.26 (s, 9H).  **$^{13}\text{C NMR}$**  (126 MHz,  $\text{CDCl}_3$ )  $\delta$ : 154.1, 136.7, 130.2, 129.6, 128.8, 127.4, 125.8 (q,  $J$  = 284.7 Hz), 124.4, 123.4 (d,  $J$  = 2.1 Hz), 121.7, 120.9, 113.1, 111.8, 111.6, 111.6, 111.3, 100.7, 95.2, 73.7, 56.1, 46.8 (q,  $J$  = 30.9 Hz), 30.7, 27.9, 9.3.  **$^{19}\text{F NMR}$**  (471 MHz,  $\text{CDCl}_3$ )  $\delta$ : -70.98. IR (ATR)  $\nu_{\text{max}}$ : 3409, 2942, 1459, 1456, 1173, 799  $\text{cm}^{-1}$ . **HRMS** (ESI):  $m/z$  calcd. for  $\text{C}_{26}\text{H}_{24}\text{N}_2\text{O}_3\text{Cl}$   $[\text{M}+\text{H}]^+$ : 473.1602; found: 473.1608. **HPLC analysis**: The enantiomeric excess was determined by HPLC with Chiralpak IA column (hexane/*i*-PrOH = 90/10, flow rate 1  $\text{mL}\cdot\text{min}^{-1}$ ,  $\lambda$  = 245 nm):  $t_{\text{major}}$  = 6.2 min,  $t_{\text{minor}}$  = 7.1 min.

(*R*)-5-methoxy-3-methyl-2-(1,1,1-trifluoro-2-(6-methoxy-1*H*-indol-3-yl)-5,5-dimethylhex-3-yn-2-yl)-1*H*-indole (**3r**)

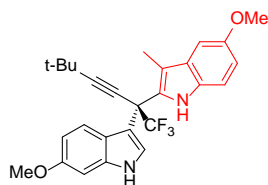

colorless oil, 3 d, 96% yield, 98:2 *er*,  $[\alpha]_D^{20}$  = +25.00 ( $c$  = 0.24, MeOH).  **$^1\text{H NMR}$**  (500 MHz,  $\text{CDCl}_3$ )  $\delta$ : 8.06 (s, 1H), 7.97 (s, 1H), 7.24 (dd,  $J$  = 14.1, 5.2 Hz, 2H), 7.14 (d,  $J$  = 8.8 Hz, 1H), 6.97 (s, 1H), 6.84 (dd,  $J$  = 8.8, 2.0 Hz, 1H), 6.81 (s, 1H), 6.64 (dd,  $J$  = 8.8, 1.7 Hz, 1H), 3.86 (s, 3H), 3.80 (s, 3H), 2.19 (s, 3H), 1.27 (s, 9H).  **$^{13}\text{C NMR}$**  (126 MHz,  $\text{CDCl}_3$ )  $\delta$ : 156.8, 154.0, 137.2, 130.2, 129.6, 127.8, 125.9 (q,  $J$  = 284.8 Hz), 121.7 (d,  $J$  = 2.3 Hz), 121.7, 120.1, 112.9, 111.8, 111.5, 111.1, 110.2, 100.6, 94.9, 94.4, 74.0, 56.1, 55.6, 46.9 (q,  $J$  = 31.0 Hz), 30.7, 27.9, 9.5.  **$^{19}\text{F NMR}$**  (471 MHz,  $\text{CDCl}_3$ )  $\delta$ : -70.91. IR (ATR)  $\nu_{\text{max}}$ : 3409, 2967, 1504, 1467, 1134, 773  $\text{cm}^{-1}$ . **HRMS** (ESI):  $m/z$  calcd. for  $\text{C}_{27}\text{H}_{27}\text{N}_2\text{O}_2\text{F}_3$   $[\text{M}+\text{H}]^+$ : 469.2097; found: 469.2106. **HPLC analysis**: The enantiomeric excess was determined by HPLC with Chiralpak IA column (hexane/*i*-PrOH = 90/10, flow rate 1  $\text{mL}\cdot\text{min}^{-1}$ ,  $\lambda$  = 280 nm):  $t_{\text{major}}$  = 7.8 min,  $t_{\text{minor}}$  = 11.4 min.

(*R*)-ethyl 2-(1*H*-indol-3-yl)-2-(5-methoxy-3-methyl-1*H*-indol-2-yl)-5,5-dimethylhex-3-ynoate (**3s**)

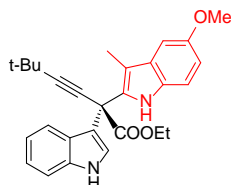

colorless oil, 7 d, 82% yield, 95:5 *er*,  $[\alpha]_D^{20}$  = -7.00 ( $c$  = 0.10, MeOH).  **$^1\text{H NMR}$**  (400 MHz,  $\text{CDCl}_3$ )  $\delta$ : 8.28 (s, 1H), 8.15 (s, 1H), 7.65 (d,  $J$  = 8.1 Hz, 1H), 7.39 (d,  $J$  = 8.2 Hz, 1H), 7.28 (s, 1H), 7.25-7.18 (m, 2H), 7.14 (d,  $J$  = 8.7

Hz, 1H), 7.07 (dd,  $J = 11.2, 3.9$  Hz, 1H), 7.01 (d,  $J = 2.4$  Hz, 1H), 6.82 (dd,  $J = 8.7, 2.4$  Hz, 1H), 4.35-4.15 (m, 2H), 3.89 (s, 3H), 2.27 (s, 3H), 1.39-1.12 (m, 11H).  $^{13}\text{C NMR}$  (101 MHz,  $\text{CDCl}_3$ )  $\delta$ : 170.5, 154.0, 137.1, 132.3, 130.4, 129.3, 125.6, 124.3, 122.5, 121.3, 120.0, 114.5, 111.9, 111.8, 111.4, 108.6, 100.5, 93.8, 62.4, 56.1, 46.9, 31.0, 29.6, 27.9, 14.2, 9.5. IR (ATR)  $\nu_{\text{max}}$ : 3364, 2925, 2854, 1700, 1217, 743  $\text{cm}^{-1}$ . **HRMS** (ESI):  $m/z$  calcd. for  $\text{C}_{28}\text{H}_{30}\text{N}_2\text{O}_3$  [M-H] $^-$ : 441.2184; found: 441.2169. **HPLC analysis**: The enantiomeric excess was determined by HPLC with Chiralpak IA column (hexane/*i*-PrOH = 95/5, flow rate 1  $\text{mL}\cdot\text{min}^{-1}$ ,  $\lambda = 245$  nm):  $t_{\text{major}} = 44.0$  min,  $t_{\text{minor}} = 20.8$  min.

(*R*)-5-methoxy-3-methyl-2-(1,1,1-trifluoro-2-(1*H*-indol-3-yl)-4-(trimethylsilyl)but-3-yn-2-yl)-1*H*-indole (**3t**)

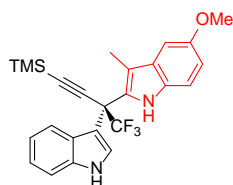

colorless oil, 18 h, 86% yield, 95:5 *er*,  $[\alpha]_D^{20} = +80.00$  ( $c = 0.13$ , MeOH).  $^1\text{H NMR}$  (500 MHz,  $\text{CDCl}_3$ )  $\delta$ : 8.26 (s, 1H), 7.99 (s, 1H), 7.39 (d,  $J = 7.9$  Hz, 2H), 7.33 (d,  $J = 8.1$  Hz, 1H), 7.19 (t,  $J = 7.6$  Hz, 1H), 7.15 (d,  $J = 8.8$  Hz, 1H), 7.00-6.92 (m, 2H), 6.85 (d,  $J = 8.7$  Hz, 1H), 3.85 (s, 3H), 2.15 (s, 3H), 0.21 (s, 9H).  $^{13}\text{C NMR}$  (126 MHz,  $\text{CDCl}_3$ )  $\delta$ : 154.1, 136.4, 130.2, 129.7, 126.9, 125.7 (q,  $J = 285.4$  Hz), 125.7, 123.2 (d,  $J = 2.3$  Hz), 122.8, 120.9, 120.3, 113.1, 111.9, 111.4, 110.1, 100.7, 99.5, 92.0, 56.0, 47.8 (q,  $J = 31.0$  Hz), 9.4, -0.2.  $^{19}\text{F NMR}$  (471 MHz,  $\text{CDCl}_3$ )  $\delta$ : -70.39. IR (ATR)  $\nu_{\text{max}}$ : 3410, 2958, 1485, 1458, 843, 743  $\text{cm}^{-1}$ . **HRMS** (ESI):  $m/z$  calcd. for  $\text{C}_{25}\text{H}_{25}\text{N}_2\text{OF}_3\text{Si}$  [M+H] $^+$ : 455.1761; found: 455.1782. **HPLC analysis**: The enantiomeric excess was determined by HPLC with Chiralpak IA column (hexane/*i*-PrOH = 95/5, flow rate 1  $\text{mL}\cdot\text{min}^{-1}$ ,  $\lambda = 254$  nm):  $t_{\text{major}} = 10.3$  min,  $t_{\text{minor}} = 11.6$  min.

(*R*)-5-methoxy-3-methyl-2-(1,1,1-trifluoro-2-(5-fluoro-1*H*-indol-3-yl)-4-(trimethylsilyl)but-3-yn-2-yl)-1*H*-indole (**3u**)

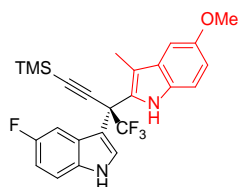

Colorless oil, 48 h, 87% yield, 95:5 *er*,  $[\alpha]_D^{20} = +68.33$  ( $c = 0.18$ , MeOH).  $^1\text{H NMR}$  (500 MHz,  $\text{CDCl}_3$ )  $\delta$ : 8.27 (s, 1H), 8.00 (s, 1H), 7.39 (s, 1H), 7.29 (dd,  $J = 8.8, 4.3$  Hz, 1H), 7.18 (d,  $J = 8.8$  Hz, 1H), 7.03 (dd,  $J = 9.9, 1.8$  Hz, 1H), 6.97 (d,  $J = 1.6$  Hz, 1H), 6.94 (td,  $J = 9.0, 2.2$  Hz, 1H), 6.87 (dd,  $J = 8.8, 2.1$  Hz, 1H), 3.86 (s, 3H), 2.13 (s, 3H), 0.23 (s, 9H).  $^{13}\text{C NMR}$  (126 MHz,  $\text{CDCl}_3$ )  $\delta$ : 157.8 (d,  $J = 235.5$  Hz), 154.1, 132.85, 130.2, 129.7, 126.3, 126.2 (d,  $J = 10.4$  Hz), 125.5 (q,  $J = 285.0$  Hz), 124.7 (d,  $J = 2.3$  Hz), 113.3, 112.1 (d,  $J = 9.7$  Hz), 111.9, 111.9, 111.5 (d,  $J = 26.6$  Hz), 110.4 (d,  $J = 4.7$  Hz), 105.9 (d,  $J = 24.8$  Hz), 100.7, 99.1, 92.4, 56.1, 47.7 (q,  $J = 31.3$  Hz), 9.4, -0.3.  $^{19}\text{F NMR}$  (471 MHz,  $\text{CDCl}_3$ )  $\delta$ : -70.44, -123.03. IR (ATR)  $\nu_{\text{max}}$ : 3434, 2968, 1464, 1432, 911, 740  $\text{cm}^{-1}$ . **HRMS** (ESI):  $m/z$  calcd. for  $\text{C}_{25}\text{H}_{24}\text{N}_2\text{OF}_4\text{Si}$  [M-H] $^-$ : 471.1521; found: 471.1525. **HPLC analysis**: The enantiomeric excess was determined by HPLC with Chiralpak IA column (hexane/*i*-PrOH = 95/5, flow rate 1  $\text{mL}\cdot\text{min}^{-1}$ ,  $\lambda = 280$  nm):  $t_{\text{major}} = 12.1$  min,  $t_{\text{minor}} = 13.6$  min.

(*R*)-2-(2-(5-chloro-1*H*-indol-3-yl)-1,1,1-trifluoro-4-(trimethylsilyl)but-3-yn-2-yl)-5-methoxy-3-methyl-1*H*-indole (**3v**)

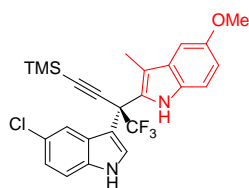

colorless oil, 48 h, 80% yield, 96:4 *er*,  $[\alpha]_D^{20} = +63.53$  ( $c = 0.17$ , MeOH). **<sup>1</sup>H NMR** (500 MHz, CDCl<sub>3</sub>)  $\delta$ : 8.29 (s, 1H), 7.97 (s, 1H), 7.46 (s, 1H), 7.34 (s, 1H), 7.28 (t,  $J = 8.6$  Hz, 1H), 7.18 (d,  $J = 8.8$  Hz, 1H), 7.15 (d,  $J = 8.7$  Hz, 1H), 6.98 (s, 1H), 6.87 (d,  $J = 8.8$  Hz, 1H), 3.86 (s, 3H), 2.16 (s, 3H), 0.24 (s, 9H). **<sup>13</sup>C NMR** (126 MHz, CDCl<sub>3</sub>)  $\delta$ : 154.1, 134.7, 130.2, 129.7, 127.8 (q,  $J = 285.0$  Hz), 126.7, 126.3, 126.0, 124.4 (d,  $J = 2.1$  Hz), 123.4, 120.4, 113.3, 112.4, 111.9, 110.0, 100.7, 99.1, 92.6, 56.1, 47.7 (q,  $J = 31.2$  Hz), 9.5, -0.3. **<sup>19</sup>F NMR** (471 MHz, CDCl<sub>3</sub>)  $\delta$ : -70.40. IR (ATR)  $\nu_{max}$ : 3438, 2913, 1495, 1482, 863, 741 cm<sup>-1</sup>. **HRMS** (ESI):  $m/z$  calcd. for C<sub>25</sub>H<sub>24</sub>N<sub>2</sub>OF<sub>3</sub>SiCl [M-H]<sup>-</sup>: 487.1226; found: 487.1225. **HPLC analysis**: The enantiomeric excess was determined by HPLC with Chiralpak IA column (hexane/*i*-PrOH = 95/5, flow rate 1 mL·min<sup>-1</sup>,  $\lambda = 280$  nm):  $t_{major} = 13.0$  min,  $t_{minor} = 16.5$  min.

(*R*)-2-(2-(5-bromo-1*H*-indol-3-yl)-1,1,1-trifluoro-4-(trimethylsilyl)but-3-yn-2-yl)-5-methoxy-3-methyl-1*H*-indole  
(**3w**)

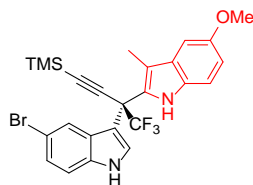

colorless oil, 48 h, 88% yield, 96:4 *er*,  $[\alpha]_D^{20} = +50.48$  ( $c = 0.21$ , MeOH). **<sup>1</sup>H NMR** (500 MHz, CDCl<sub>3</sub>)  $\delta$ : 8.27 (s, 1H), 7.91 (s, 1H), 7.61 (s, 1H), 7.29 (s, 1H), 7.22 (t,  $J = 9.0$  Hz, 2H), 7.14 (d,  $J = 8.8$  Hz, 1H), 6.94 (s, 1H), 6.83 (d,  $J = 8.8$  Hz, 1H), 3.83 (s, 3H), 2.12 (s, 3H), 0.21 (s, 9H). **<sup>13</sup>C NMR** (126 MHz, CDCl<sub>3</sub>)  $\delta$ : 154.1, 135.0, 130.2, 129.7, 127.4, 126.3, 126.0, 125.5 (q,  $J = 285.0$  Hz), 124.3 (d,  $J = 2.4$  Hz), 123.5, 113.7, 113.3, 112.9, 111.9, 109.9, 100.7, 99.0, 92.7, 56.1, 47.7 (q,  $J = 31.2$  Hz), 9.5, -0.3. **<sup>19</sup>F NMR** (471 MHz, CDCl<sub>3</sub>)  $\delta$ : -70.39. IR (ATR)  $\nu_{max}$ : 3424, 2937, 1466, 1448, 812, 738 cm<sup>-1</sup>. **HRMS** (ESI):  $m/z$  calcd. for C<sub>25</sub>H<sub>24</sub>N<sub>2</sub>OF<sub>3</sub>SiBr [M-H]<sup>-</sup>: 531.0721; found: 531.0727. **HPLC analysis**: The enantiomeric excess was determined by HPLC with Chiralpak IA column (hexane/*i*-PrOH = 95/5, flow rate 1 mL·min<sup>-1</sup>,  $\lambda = 280$  nm):  $t_{major} = 13.5$  min,  $t_{minor} = 18.0$  min.

(*R*)-5-methoxy-3-methyl-2-(1,1,1-trifluoro-2-(5-methyl-1*H*-indol-3-yl)-4-(trimethylsilyl)but-3-yn-2-yl)-1*H*-indole  
(**3x**)

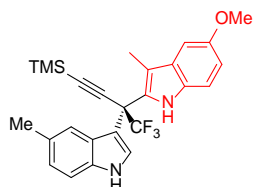

colorless oil, 12 h, 82% yield, 96.5:3.5 *er*,  $[\alpha]_D^{20} = +82.00$  ( $c = 0.15$ , MeOH). **<sup>1</sup>H NMR** (500 MHz, CDCl<sub>3</sub>)  $\delta$ : 8.14 (s, 1H), 7.89 (s, 1H), 7.29 (s, 1H), 7.28-7.21 (m, 2H), 7.11 (d,  $J = 8.8$  Hz, 1H), 7.01 (d,  $J = 8.3$  Hz, 1H), 6.97 (s, 1H), 6.82 (d,  $J = 8.8$  Hz, 1H), 3.84 (s, 3H), 2.28 (s, 3H), 2.22 (s, 3H), 0.20 (s, 9H). **<sup>13</sup>C NMR** (126 MHz, CDCl<sub>3</sub>)  $\delta$ : 154.0, 134.7, 130.3, 129.6, 129.5, 127.9 (q,  $J = 284.9$  Hz), 126.9, 125.9, 124.6, 123.3 (d,  $J = 2.5$  Hz), 120.6, 113.0, 111.9, 111.7, 111.0, 109.3, 100.6, 99.5, 91.9, 56.0, 47.8 (q,  $J = 31.0$  Hz), 21.7, 9.6, -0.3. **<sup>19</sup>F NMR** (471 MHz, CDCl<sub>3</sub>)  $\delta$ : -70.29. IR (ATR)  $\nu_{max}$ : 3408, 2958, 1484, 1468, 843, 743 cm<sup>-1</sup>. **HRMS** (ESI):  $m/z$  calcd. for C<sub>26</sub>H<sub>27</sub>N<sub>2</sub>OF<sub>3</sub>Si [M-H]<sup>-</sup>: 467.1772; found: 467.1771. **HPLC analysis**: The enantiomeric excess was determined

by HPLC with Chiralpak IA column (hexane/*i*-PrOH = 95/5, flow rate 1 mL·min<sup>-1</sup>, λ = 280 nm): *t*<sub>major</sub> = 9.8 min, *t*<sub>minor</sub> = 13.8 min.

(*R*)-5-methoxy-3-methyl-2-(1,1,1-trifluoro-2-(5-methoxy-1*H*-indol-3-yl)-4-(trimethylsilyl)but-3-yn-2-yl)-1*H*-indole (**3y**)

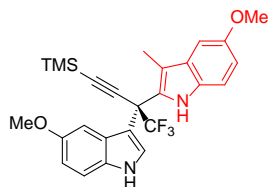

colorless oil, 12 h, 84% yield, 95:5 *er*,  $[\alpha]_D^{20} = +65.88$  (*c* = 0.17, MeOH). **<sup>1</sup>H NMR** (500 MHz, CDCl<sub>3</sub>) δ: 8.17 (s, 1H), 8.01 (s, 1H), 7.33 (s, 1H), 7.25 (d, *J* = 9.1 Hz, 1H), 7.16 (d, *J* = 8.8 Hz, 1H), 6.97 (s, 1H), 6.85 (d, *J* = 8.8 Hz, 2H), 6.71 (s, 1H), 3.86 (s, 3H), 3.55 (s, 3H), 2.17 (s, 3H), 0.22 (s, 9H). **<sup>13</sup>C NMR** (126 MHz, CDCl<sub>3</sub>) δ: 154.2, 154.0, 131.4, 130.2, 129.7, 126.6, 126.2, 125.7 (q, *J* = 285.0 Hz), 123.9 (d, *J* = 2.2 Hz), 113.2, 113.1, 112.0, 111.9, 111.8, 109.8, 102.4, 100.6, 99.4, 91.7, 56.0, 55.7, 47.7 (q, *J* = 30.9 Hz), 9.5, -0.2. **<sup>19</sup>F NMR** (471 MHz, CDCl<sub>3</sub>) δ: -70.28. IR (ATR) *v*<sub>max</sub>: 3409, 2937, 1475, 1434, 813, 744 cm<sup>-1</sup>. **HRMS** (ESI): *m/z* calcd. for C<sub>26</sub>H<sub>27</sub>N<sub>2</sub>O<sub>2</sub>F<sub>3</sub>Si [M-H]<sup>-</sup>: 483.1721; found: 483.1726. **HPLC analysis**: The enantiomeric excess was determined by HPLC with Chiralpak IA column (hexane/*i*-PrOH = 95/5, flow rate 1 mL·min<sup>-1</sup>, λ = 254 nm): *t*<sub>major</sub> = 13.5 min, *t*<sub>minor</sub> = 18.8 min.

(*R*)-2-(2-(6-chloro-1*H*-indol-3-yl)-1,1,1-trifluoro-4-(trimethylsilyl)but-3-yn-2-yl)-5-methoxy-3-methyl-1*H*-indole (**3z**)

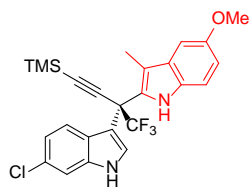

colorless oil, 120 h, 74% yield, 95:5 *er*,  $[\alpha]_D^{20} = +162.92$  (*c* = 0.08, MeOH). **<sup>1</sup>H NMR** (500 MHz, CDCl<sub>3</sub>) δ: 8.27 (s, 1H), 8.02 (s, 1H), 7.37 (d, *J* = 1.7 Hz, 2H), 7.19 (t, *J* = 7.0 Hz, 2H), 6.96 (s, 1H), 6.95-6.91 (m, 1H), 6.87 (d, *J* = 8.8 Hz, 1H), 3.86 (s, 3H), 2.09 (s, 3H), 0.21 (s, 9H). **<sup>13</sup>C NMR** (126 MHz, CDCl<sub>3</sub>) δ: 154.1, 136.7, 130.1, 129.7, 128.9, 126.4, 125.5 (q, *J* = 284.8 Hz), 124.3, 123.7, 121.7, 121.1, 113.3, 111.9 (d, *J* = 8.3 Hz), 111.3, 110.6, 100.7, 99.2, 92.2, 56.0, 47.7 (q, *J* = 31.6 Hz), 9.3, -0.2. **<sup>19</sup>F NMR** (471 MHz, CDCl<sub>3</sub>) δ: -70.50. IR (ATR) *v*<sub>max</sub>: 3407, 2939, 1467, 1445, 854, 737 cm<sup>-1</sup>. **HRMS** (ESI): *m/z* calcd. for C<sub>25</sub>H<sub>24</sub>N<sub>2</sub>OF<sub>3</sub>SiCl [M-H]<sup>-</sup>: 487.1226; found: 487.1232. **HPLC analysis**: The enantiomeric excess was determined by HPLC with Chiralpak AD-H column (hexane/*i*-PrOH = 95/5, flow rate 1 mL·min<sup>-1</sup>, λ = 280 nm): *t*<sub>major</sub> = 12.6 min, *t*<sub>minor</sub> = 11.5 min.

(*R*)-5-methoxy-3-methyl-2-(1,1,1-trifluoro-2-(6-methoxy-1*H*-indol-3-yl)-4-(trimethylsilyl)but-3-yn-2-yl)-1*H*-indole (**3aa**)

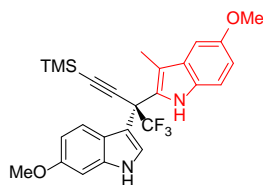

colorless oil, 20 h, 76% yield, 96:4 *er*,  $[\alpha]_D^{20} = +86.67$  (*c* = 0.15, MeOH). **<sup>1</sup>H NMR** (500 MHz, CDCl<sub>3</sub>) δ: 8.09 (s, 1H), 7.98 (s, 1H), 7.30-7.23 (m, 1H), 7.22-7.18 (m, 1H), 7.14 (dd, *J* = 8.7, 1.6 Hz, 1H), 6.98 (s, 1H), 6.85 (d, *J* =



8.7 Hz, 1H), 6.80 (s, 1H), 6.64 (d,  $J = 8.8$  Hz, 1H), 3.86 (s, 3H), 3.80 (s, 3H), 2.19 (s, 3H), 0.27-0.10 (m, 9H).  **$^{13}\text{C}$  NMR** (126 MHz,  $\text{CDCl}_3$ )  $\delta$ : 156.9, 154.0, 137.2, 130.2, 129.6, 126.8, 125.6 (q,  $J = 285.1$  Hz), 121.9, 121.5, 119.9, 113.1, 111.8 (d,  $J = 4.6$  Hz), 110.4, 110.0, 100.6, 99.6, 94.5, 91.9, 56.0, 55.6, 47.7 (q,  $J = 31.0$  Hz), 9.4, -0.2.  **$^{19}\text{F}$  NMR** (471 MHz,  $\text{CDCl}_3$ )  $\delta$ : -70.43. IR (ATR)  $\nu_{\text{max}}$ : 3414, 2968 1484, 1452, 829, 742  $\text{cm}^{-1}$ . **HRMS** (ESI):  $m/z$  calcd. for  $\text{C}_{26}\text{H}_{27}\text{N}_2\text{O}_2\text{F}_3\text{Si}$  [M-H]: 483.1721; found: 483.1713. **HPLC analysis**: The enantiomeric excess was determined by HPLC with Chiralpak IA column (hexane/*i*-PrOH = 95/5, flow rate 1  $\text{mL}\cdot\text{min}^{-1}$ ,  $\lambda = 254$  nm):  $t_{\text{major}} = 14.7$  min,  $t_{\text{minor}} = 18.9$  min.

(*R*)-3,5-dimethyl-2-(1,1,1-trifluoro-2-(1*H*-indol-3-yl)-4-(trimethylsilyl)but-3-yn-2-yl)-1*H*-indole (**3ab**)

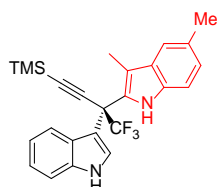

colorless oil, 36 h, 92% yield, 95:5 *er*,  $[\alpha]_D^{20} = +86.47$  ( $c = 0.17$ , MeOH).  **$^1\text{H}$  NMR** (500 MHz,  $\text{CDCl}_3$ )  $\delta$ : 8.17 (s, 1H), 8.01 (s, 1H), 7.42-7.29 (m, 4H), 7.22-7.12 (m, 2H), 7.03 (d,  $J = 8.3$  Hz, 1H), 6.96 (t,  $J = 7.6$  Hz, 1H), 2.46 (s, 3H), 2.16 (s, 3H), 0.21 (s, 9H).  **$^{13}\text{C}$  NMR** (126 MHz,  $\text{CDCl}_3$ )  $\delta$ : 136.3, 132.8, 130.1, 128.7, 126.1, 125.7, 125.7 (q,  $J = 284.8$  Hz), 124.3, 123.1 (d,  $J = 2.4$  Hz), 122.8, 120.9, 120.3, 118.6, 111.7, 111.3, 110.7, 110.2, 99.6, 91.9, 47.7 (q,  $J = 31.2$  Hz), 21.6, 9.3, -0.2.  **$^{19}\text{F}$  NMR** (471 MHz,  $\text{CDCl}_3$ )  $\delta$ : -70.41. IR (ATR)  $\nu_{\text{max}}$ : 3445, 2976, 1482, 1457, 1107, 785  $\text{cm}^{-1}$ . **HRMS** (ESI):  $m/z$  calcd. for  $\text{C}_{25}\text{H}_{25}\text{N}_2\text{F}_3\text{Si}$  [M-H]: 437.1666; found: 437.1672. **HPLC analysis**: The enantiomeric excess was determined by HPLC with Chiralpak IA column (hexane/*i*-PrOH = 95/5, flow rate 1  $\text{mL}\cdot\text{min}^{-1}$ ,  $\lambda = 254$  nm):  $t_{\text{major}} = 7.9$  min,  $t_{\text{minor}} = 9.4$  min.

(*R,E*)-5-methoxy-3-methyl-2-(1,1,1-trifluoro-2-(1*H*-indol-3-yl)-4-(trimethylsilyl)but-3-en-2-yl)-1*H*-indole (**3ac**)

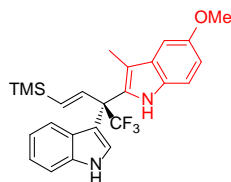

colorless oil, 56 h, 78% yield, 94:6 *er*,  $[\alpha]_D^{20} = +38.18$  ( $c = 0.11$ , MeOH).  **$^1\text{H}$  NMR** (500 MHz,  $\text{CDCl}_3$ )  $\delta$ : 8.28 (s, 1H), 7.89 (s, 1H), 7.39 (d,  $J = 8.2$  Hz, 1H), 7.27 (d,  $J = 6.8$  Hz, 1H), 7.16 (dd,  $J = 17.6, 8.2$  Hz, 2H), 7.01 (dd,  $J = 9.8, 5.1$  Hz, 2H), 6.91 (t,  $J = 7.6$  Hz, 1H), 6.85 (dd,  $J = 8.7, 2.2$  Hz, 1H), 6.68 (d,  $J = 18.8$  Hz, 1H), 5.99 (d,  $J = 18.8$  Hz, 1H), 3.88 (s, 3H), 2.02 (s, 3H), 0.10 (s, 9H).  **$^{13}\text{C}$  NMR** (126 MHz,  $\text{CDCl}_3$ )  $\delta$ : 154.0, 138.7, 136.5, 135.7, 130.1, 129.9, 129.1, 127.2 (q,  $J = 285.4$  Hz), 126.1, 124.4 (d,  $J = 1.4$  Hz), 122.5, 121.5, 120.2, 112.6, 111.8, 111.7, 111.4, 111.3, 100.5, 56.1 (q,  $J = 26.0$  Hz), 56.1, 10.4, -1.3.  **$^{19}\text{F}$  NMR** (471 MHz,  $\text{CDCl}_3$ )  $\delta$ : -67.78. **HRMS** (ESI):  $m/z$  calcd. for  $\text{C}_{25}\text{H}_{27}\text{N}_2\text{OF}_3\text{Si}$  [M-H]: 455.1772; found: 455.1753. IR (ATR)  $\nu_{\text{max}}$ : 3408, 2954, 1486, 1458, 839, 742  $\text{cm}^{-1}$ . **HPLC analysis**: The enantiomeric excess was determined by HPLC with Chiralpak IB column (hexane/*i*-PrOH = 95/5, flow rate 1  $\text{mL}\cdot\text{min}^{-1}$ ,  $\lambda = 254$  nm):  $t_{\text{major}} = 17.7$  min,  $t_{\text{minor}} = 11.4$  min.

(*R,E*)-5-methoxy-3-methyl-2-(1,1,1-trifluoro-2-(5-fluoro-1*H*-indol-3-yl)-4-(trimethylsilyl)but-3-en-2-yl)-1*H*-indole (**3ad**)

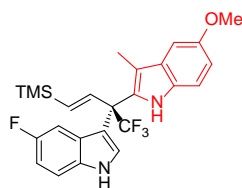

colorless oil, 96 h, 85% yield, 93:7 *er*,  $[\alpha]_D^{20} = +22.00$  ( $c = 0.20$ , MeOH). **<sup>1</sup>H NMR** (500 MHz, CDCl<sub>3</sub>)  $\delta$ : 8.29 (s, 1H), 7.86 (s, 1H), 7.35-7.28 (m, 2H), 7.17 (d,  $J = 8.7$  Hz, 1H), 6.98 (d,  $J = 1.5$  Hz, 1H), 6.92 (td,  $J = 8.9, 2.0$  Hz, 1H), 6.86 (dd,  $J = 8.7, 2.0$  Hz, 1H), 6.67 (d,  $J = 10.3$  Hz, 1H), 6.62 (d,  $J = 18.8$  Hz, 1H), 5.96 (d,  $J = 18.8$  Hz, 1H), 3.87 (s, 3H), 1.97 (s, 3H), 0.10 (s, 9H). **<sup>13</sup>C NMR** (126 MHz, CDCl<sub>3</sub>)  $\delta$ : 157.8 (d,  $J = 235.2$  Hz), 154.1, 138.3, 136.3, 133.0, 130.0 (d,  $J = 10.6$  Hz), 128.5, 127.1 (q,  $J = 285.6$  Hz), 126.6 (d,  $J = 10.5$  Hz), 126.2, 112.8, 112.0 (d,  $J = 4.9$  Hz), 112.0, 111.8, 111.6, 111.3, 111.1, 106.4 (d,  $J = 24.8$  Hz), 100.6, 56.1, 56.0 (q,  $J = 23.2$  Hz), 10.3, -1.3. **<sup>19</sup>F NMR** (471 MHz, CDCl<sub>3</sub>)  $\delta$ : -67.82, -123.13. IR (ATR)  $\nu_{max}$ : 3411, 2948, 1456, 1444, 843, 744 cm<sup>-1</sup>. **HRMS** (ESI):  $m/z$  calcd. for C<sub>25</sub>H<sub>26</sub>N<sub>2</sub>O<sub>4</sub>Si [M-H]<sup>-</sup>: 473.1678; found: 473.1667. **HPLC analysis**: The enantiomeric excess was determined by HPLC with Chiralpak AD-H column (hexane/*i*-PrOH = 95/5, flow rate 1 mL·min<sup>-1</sup>,  $\lambda = 254$  nm):  $t_{major} = 16.5$  min,  $t_{minor} = 15.0$  min.

(*R,E*)-2-(2-(5-chloro-1*H*-indol-3-yl)-1,1,1-trifluoro-4-(trimethylsilyl)but-3-en-2-yl)-5-methoxy-3-methyl-1*H*-indole (**3ae**)

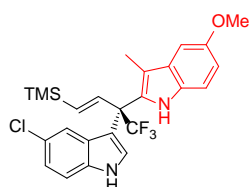

colorless oil, 72 h, 92% yield, 93:7 *er*,  $[\alpha]_D^{20} = +23.00$  ( $c = 0.20$ , MeOH). **<sup>1</sup>H NMR** (500 MHz, CDCl<sub>3</sub>)  $\delta$ : 8.32 (s, 1H), 7.84 (s, 1H), 7.30 (d,  $J = 8.7$  Hz, 1H), 7.26 (s, 1H), 7.17 (d,  $J = 8.8$  Hz, 1H), 7.13 (d,  $J = 8.7$  Hz, 1H), 7.08 (s, 1H), 7.00 (s, 1H), 6.87 (d,  $J = 8.7$  Hz, 1H), 6.59 (d,  $J = 18.8$  Hz, 1H), 6.00 (d,  $J = 18.8$  Hz, 1H), 3.88 (s, 3H), 2.00 (s, 3H), 0.11 (s, 9H). **<sup>13</sup>C NMR** (126 MHz, CDCl<sub>3</sub>)  $\delta$ : 154.1, 138.1, 136.6, 134.9, 130.1, 129.9, 128.4, 127.1, 127.1 (q,  $J = 285.8$  Hz), 126.0 (d,  $J = 11.5$  Hz), 123.1, 121.0, 112.9, 112.4, 111.8, 111.5, 111.4, 100.6, 100.1, 56.1 (q,  $J = 26.1$  Hz), 56.1, 10.5, -1.4. **<sup>19</sup>F NMR** (471 MHz, CDCl<sub>3</sub>)  $\delta$ : -67.77. IR (ATR)  $\nu_{max}$ : 3409, 2965, 1472, 1452, 832, 735 cm<sup>-1</sup>. **HRMS** (ESI):  $m/z$  calcd. for C<sub>25</sub>H<sub>26</sub>N<sub>2</sub>O<sub>4</sub>SiCl [M-H]<sup>-</sup>: 489.1382; found: 489.1369. **HPLC analysis**: The enantiomeric excess was determined by HPLC with Chiralpak AD-H column (hexane/*i*-PrOH = 95/5, flow rate 1 mL·min<sup>-1</sup>,  $\lambda = 254$  nm):  $t_{major} = 17.6$  min,  $t_{minor} = 16.3$  min.

(*R,E*)-2-(2-(5-bromo-1*H*-indol-3-yl)-1,1,1-trifluoro-4-(trimethylsilyl)but-3-en-2-yl)-5-methoxy-3-methyl-1*H*-indole (**3af**)

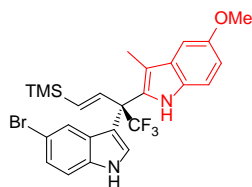

colorless oil, 76 h, 90% yield, 92.5:7.5 *er*,  $[\alpha]_D^{20} = +19.55$  ( $c = 0.22$ , MeOH). **<sup>1</sup>H NMR** (500 MHz, CDCl<sub>3</sub>)  $\delta$ : 8.32 (s, 1H), 7.82 (s, 1H), 7.25 (d,  $J = 13.2$  Hz, 4H), 7.16 (d,  $J = 8.7$  Hz, 1H), 6.99 (s, 1H), 6.86 (dd,  $J = 8.7, 1.3$  Hz, 1H), 6.58 (d,  $J = 18.8$  Hz, 1H), 6.01 (d,  $J = 18.8$  Hz, 1H), 3.87 (s, 3H), 2.00 (s, 3H), 0.11 (s, 9H). **<sup>13</sup>C NMR** (126 MHz, CDCl<sub>3</sub>)  $\delta$ : 154.1, 138.0, 136.6, 135.2, 130.1, 130.0, 129.4 (q,  $J = 285.8$  Hz), 128.5, 127.7, 126.0 (d,  $J = 1.5$  Hz), 125.6, 124.1, 113.6, 112.9, 111.8, 111.5, 111.2, 100.6, 56.1 (q,  $J = 25.3$  Hz), 56.1, 10.5, -1.4. **<sup>19</sup>F NMR**

(471 MHz, CDCl<sub>3</sub>) δ: -67.76. IR (ATR)  $\nu_{max}$ : 3414, 2979, 1511, 1467, 859, 743 cm<sup>-1</sup>. **HRMS** (ESI):  $m/z$  calcd. for C<sub>25</sub>H<sub>26</sub>N<sub>2</sub>O<sub>3</sub>SiBr [M-H]<sup>-</sup>: 533.0877; found: 533.0872. **HPLC analysis**: The enantiomeric excess was determined by HPLC with Chiralpak IA column (hexane/*i*-PrOH = 95/5, flow rate 1 mL·min<sup>-1</sup>, λ = 254 nm):  $t_{major}$  = 17.0 min,  $t_{minor}$  = 18.6 min.

(*R,E*)-5-methoxy-3-methyl-2-(1,1,1-trifluoro-2-(5-methyl-1*H*-indol-3-yl)-4-(trimethylsilyl)but-3-en-2-yl)-1*H*-indole (**3ag**)

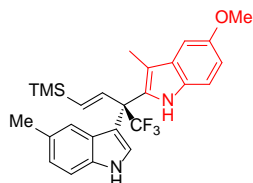

colorless oil, 90 h, 87% yield, 96:4 *er*,  $[\alpha]_D^{20}$  = +1.67 (c = 0.18, MeOH). **<sup>1</sup>H NMR** (400 MHz, CDCl<sub>3</sub>) δ: 8.18 (s, 1H), 7.85 (s, 1H), 7.37-7.24 (m, 1H), 7.22 (d, *J* = 1.2 Hz, 1H), 7.14 (d, *J* = 8.7 Hz, 1H), 7.02 (dd, *J* = 8.3, 1.6 Hz, 2H), 6.92 (s, 1H), 6.86 (dd, *J* = 8.8, 2.4 Hz, 1H), 6.63 (d, *J* = 18.9 Hz, 1H), 6.06 (d, *J* = 18.8 Hz, 1H), 3.89 (s, 3H), 2.26 (s, 3H), 2.11 (s, 3H), 0.12 (s, 9H). **<sup>13</sup>C NMR** (126 MHz, CDCl<sub>3</sub>) δ: 154.0, 138.4, 135.8, 134.9, 130.2, 129.9, 129.4, 129.1, 127.3 (q, *J* = 285.5 Hz), 126.2, 124.9 (d, *J* = 1.6 Hz), 124.2, 121.3, 112.6, 111.8, 111.2, 111.0, 110.7, 100.5, 56.3 (q, *J* = 25.9 Hz), 56.1, 21.7, 10.7, -1.4. **<sup>19</sup>F NMR** (376 MHz, CDCl<sub>3</sub>) δ: -67.63. **HRMS** (ESI):  $m/z$  calcd. for C<sub>26</sub>H<sub>29</sub>N<sub>2</sub>O<sub>3</sub>Si [M-H]<sup>-</sup>: 469.1928; found: 469.1919. IR (ATR)  $\nu_{max}$ : 3403, 2953, 1484, 1157, 838, 739 cm<sup>-1</sup>. **HPLC analysis**: The enantiomeric excess was determined by HPLC with Chiralpak AD-H column (hexane/*i*-PrOH = 95/5, flow rate 1 mL·min<sup>-1</sup>, λ = 254 nm):  $t_{major}$  = 10.7 min,  $t_{minor}$  = 12.0 min.

(*R,E*)-5-methoxy-3-methyl-2-(1,1,1-trifluoro-2-(5-methoxy-1*H*-indol-3-yl)-4-(trimethylsilyl)but-3-en-2-yl)-1*H*-indole (**3ah**)

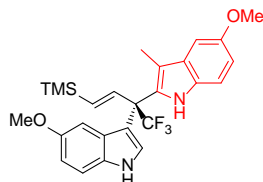

colorless oil, 86 h, 80% yield, 94:6 *er*,  $[\alpha]_D^{20}$  = +30.00 (c = 0.18, MeOH). **<sup>1</sup>H NMR** (400 MHz, CDCl<sub>3</sub>) δ: 8.20 (s, 1H), 7.94 (s, 1H), 7.26 (dd, *J* = 9.9, 5.6 Hz, 2H), 7.17 (dd, *J* = 8.7, 1.2 Hz, 1H), 7.00 (s, 1H), 6.84 (dd, *J* = 11.1, 9.2 Hz, 2H), 6.69 (d, *J* = 18.9 Hz, 1H), 6.30 (s, 1H), 6.00 (d, *J* = 18.8 Hz, 1H), 3.88 (s, 3H), 3.42 (s, 3H), 2.04 (s, 3H), 0.12 (s, 9H). **<sup>13</sup>C NMR** (126 MHz, CDCl<sub>3</sub>) δ: 154.1, 154.0, 138.8, 135.9, 131.5, 130.0, 129.9, 129.0, 127.2 (q, *J* = 285.5 Hz), 126.7, 125.1, 113.1, 112.7, 112.0, 111.7, 111.4, 111.3, 102.7, 100.5, 56.1 (q, *J* = 26.0 Hz), 56.1, 55.5, 10.5, -1.3. **<sup>19</sup>F NMR** (376 MHz, CDCl<sub>3</sub>) δ: -67.78. IR (ATR)  $\nu_{max}$ : 3408, 2961, 1484, 1167, 853, 740 cm<sup>-1</sup>. **HRMS** (ESI):  $m/z$  calcd. for C<sub>26</sub>H<sub>29</sub>N<sub>2</sub>O<sub>2</sub>F<sub>3</sub>Si [M-H]<sup>-</sup>: 485.1878; found: 485.1857. **HPLC analysis**: The enantiomeric excess was determined by HPLC with Chiralpak AD-H column (hexane/*i*-PrOH = 95/5, flow rate 1 mL·min<sup>-1</sup>, λ = 280 nm):  $t_{major}$  = 14.8 min,  $t_{minor}$  = 20.8 min.

(*R,E*)-5-methoxy-3-methyl-2-(1,1,1-trifluoro-2-(6-fluoro-1*H*-indol-3-yl)-4-(trimethylsilyl)but-3-en-2-yl)-1*H*-indole (**3ai**)

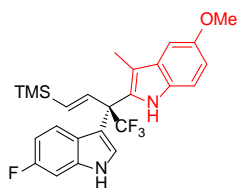

colorless oil, 120 h, 76% yield, 95:5 *er*,  $[\alpha]_D^{20} = +11.11$  (*c* = 0.18, MeOH). **<sup>1</sup>H NMR** (500 MHz, CDCl<sub>3</sub>) δ: 8.26 (s, 1H), 7.89 (s, 1H), 7.26 (d, *J* = 4.5 Hz, 1H), 7.17 (d, *J* = 8.7 Hz, 1H), 7.06 (d, *J* = 9.2 Hz, 1H), 6.99 (s, 1H), 6.93-6.80 (m, 2H), 6.73-6.52 (m, 2H), 5.95 (d, *J* = 18.8 Hz, 1H), 3.88 (s, 3H), 1.97 (s, 3H), 0.10 (s, 9H). **<sup>13</sup>C NMR** (126 MHz, CDCl<sub>3</sub>) δ: 160.0 (d, *J* = 239.1 Hz), 154.1, 138.6, 136.5 (d, *J* = 12.2 Hz), 136.1, 130.0, 129.9, 128.8, 127.1 (q, *J* = 285.5 Hz), 124.7, 122.7, 122.3 (d, *J* = 9.8 Hz), 112.8, 112.0, 111.8, 111.6, 109.1 (d, *J* = 24.1 Hz), 100.6, 97.5 (d, *J* = 25.9 Hz), 56.1, 55.9 (q, *J* = 26.5 Hz), 10.3, -1.3. **<sup>19</sup>F NMR** (471 MHz, CDCl<sub>3</sub>) δ: -67.89, -120.47. IR (ATR)  $\nu_{max}$ : 3407, 2959, 1454, 1138, 842, 740 cm<sup>-1</sup>. **HRMS** (ESI): *m/z* calcd. for C<sub>25</sub>H<sub>26</sub>N<sub>2</sub>O<sub>4</sub>Si [M-H]<sup>-</sup>: 473.1678; found: 473.1660. **HPLC analysis**: The enantiomeric excess was determined by HPLC with Chiralpak IA column (hexane/*i*-PrOH = 95/5, flow rate 1 mL·min<sup>-1</sup>, λ = 254 nm): *t*<sub>major</sub> = 13.8 min, *t*<sub>minor</sub> = 13.3 min.

(*R,E*)-2-(2-(6-chloro-1*H*-indol-3-yl)-1,1,1-trifluoro-4-(trimethylsilyl)but-3-en-2-yl)-5-methoxy-3-methyl-1*H*-indole (**3aj**)

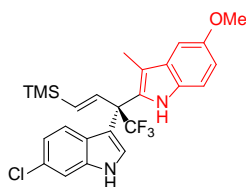

colorless oil, 120 h, 78% yield, 95:5 *er*,  $[\alpha]_D^{20} = +20.00$  (*c* = 0.18, MeOH). **<sup>1</sup>H NMR** (400 MHz, CDCl<sub>3</sub>) δ: 8.26 (s, 1H), 7.87 (s, 1H), 7.38 (s, 1H), 7.26 (s, 1H), 7.17 (d, *J* = 8.7 Hz, 1H), 6.98 (d, *J* = 2.3 Hz, 1H), 6.92-6.80 (m, 3H), 6.65 (d, *J* = 18.8 Hz, 1H), 5.94 (d, *J* = 18.8 Hz, 1H), 3.87 (s, 3H), 1.95 (s, 3H), 0.09 (s, 9H). **<sup>13</sup>C NMR** (126 MHz, CDCl<sub>3</sub>) δ: 154.1, 138.5, 136.8, 136.2, 123.0, 129.9, 128.7, 128.6, 127.1 (q, *J* = 285.3 Hz), 125.0 (d, *J* = 1.4 Hz), 124.8, 122.3, 121.0, 112.9, 112.2, 111.8, 111.6, 111.3, 100.6, 56.1, 55.9 (q, *J* = 25.8 Hz), 10.3, -1.3. **<sup>19</sup>F NMR** (376 MHz, CDCl<sub>3</sub>) δ: -67.93. IR (ATR)  $\nu_{max}$ : 3410, 2949, 1457, 1149, 839, 742 cm<sup>-1</sup>. **HRMS** (ESI): *m/z* calcd. for C<sub>25</sub>H<sub>26</sub>N<sub>2</sub>O<sub>3</sub>SiCl [M-H]<sup>-</sup>: 489.1382; found: 489.1364. **HPLC analysis**: The enantiomeric excess was determined by HPLC with Chiralpak AD-H column (hexane/*i*-PrOH = 95/5, flow rate 1 mL·min<sup>-1</sup>, λ = 254 nm): *t*<sub>major</sub> = 15.2 min, *t*<sub>minor</sub> = 14.1 min.

(*R,E*)-5-methoxy-3-methyl-2-(1,1,1-trifluoro-2-(6-methoxy-1*H*-indol-3-yl)-4-(trimethylsilyl)but-3-en-2-yl)-1*H*-indole (**3ak**)

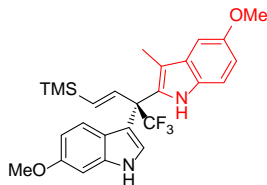

colorless oil, 48 h, 95% yield, 95:5 *er*,  $[\alpha]_D^{20} = -16.00$  (*c* = 0.20, MeOH). **<sup>1</sup>H NMR** (400 MHz, CDCl<sub>3</sub>) δ: 8.13 (s, 1H), 7.89 (s, 1H), 7.14 (d, *J* = 8.6 Hz, 2H), 6.99 (s, 1H), 6.85 (dd, *J* = 13.5, 7.0 Hz, 3H), 6.69-6.53 (m, 2H), 5.97 (d, *J* = 18.8 Hz, 1H), 3.87 (s, 3H), 3.81 (s, 3H), 2.02 (s, 3H), 0.09 (s, 9H). **<sup>13</sup>C NMR** (126 MHz, CDCl<sub>3</sub>) δ: 156.9, 154.3, 139.1, 137.6, 135.9, 130.3, 130.1, 129.4, 127.4 (q, *J* = 285.9 Hz), 123.5, 122.4, 120.6, 112.9, 112.0, 111.6, 110.5, 100.8, 94.7, 56.3 (q, *J* = 25.5 Hz), 56.3, 55.9, 10.7, -1.0. **<sup>19</sup>F NMR** (376 MHz, CDCl<sub>3</sub>) δ: -67.83. IR

(ATR)  $\nu_{\max}$ : 3405, 2952, 1479, 1144, 840, 739  $\text{cm}^{-1}$ . **HRMS** (ESI):  $m/z$  calcd. for  $\text{C}_{26}\text{H}_{29}\text{N}_2\text{O}_2\text{F}_3\text{Si}$  [M-H]<sup>-</sup>: 485.1878; found: 485.1849. **HPLC analysis**: The enantiomeric excess was determined by HPLC with Chiralpak IA column (hexane/*i*-PrOH = 95/5, flow rate 1  $\text{mL}\cdot\text{min}^{-1}$ ,  $\lambda$  = 254 nm):  $t_{\text{major}}$  = 18.2 min,  $t_{\text{minor}}$  = 25.3 min.

(*R*)-3-methyl-2-(1,1,1-trifluoro-2-(1*H*-indol-3-yl)hexan-2-yl)-1*H*-indole (**3al**)

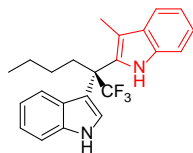

colorless oil, 5 d, 52% yield, 82:18 *er*,  $[\alpha]_D^{20}$  = +19.00 ( $c$  = 0.10, MeOH). **<sup>1</sup>H NMR** (500 MHz,  $\text{CDCl}_3$ )  $\delta$ : 8.20 (s, 1H), 8.04 (s, 1H), 7.55 (d,  $J$  = 7.8 Hz, 1H), 7.38 (d,  $J$  = 8.2 Hz, 1H), 7.34 (s, 1H), 7.25 (d,  $J$  = 8.0 Hz, 1H), 7.21-7.08 (m, 3H), 6.89 (d,  $J$  = 8.1 Hz, 1H), 6.85 (t,  $J$  = 7.5 Hz, 1H), 2.74-2.49 (m, 2H), 2.06 (s, 3H), 1.40-1.20 (m, 3H), 1.21-1.03 (m, 1H), 0.81 (t,  $J$  = 7.1 Hz, 3H). **<sup>13</sup>C NMR** (126 MHz,  $\text{CDCl}_3$ )  $\delta$ : 136.3, 134.6, 130.1, 129.7, 128.4 (q,  $J$  = 285.4 Hz), 126.4, 123.7 (d,  $J$  = 1.8 Hz), 122.5, 122.2, 121.1, 120.2, 119.2, 118.8, 112.7, 111.2, 111.1, 110.8, 51.2 (q,  $J$  = 25.4 Hz), 34.9, 27.0, 23.3, 14.0, 9.9. **<sup>19</sup>F NMR** (376 MHz,  $\text{CDCl}_3$ )  $\delta$ : -68.42. IR (ATR)  $\nu_{\max}$ : 3407, 2959, 1486, 1458, 1145, 1135, 741  $\text{cm}^{-1}$ . **HRMS** (ESI):  $m/z$  calcd. for  $\text{C}_{23}\text{H}_{23}\text{N}_2\text{F}_3$  [M-H]<sup>-</sup>: 383.1741; found: 383.1735. **HPLC analysis**: The enantiomeric excess was determined by HPLC with Chiralpak IA column (hexane/*i*-PrOH = 95/5, flow rate 1  $\text{mL}\cdot\text{min}^{-1}$ ,  $\lambda$  = 254 nm):  $t_{\text{major}}$  = 13.8 min,  $t_{\text{minor}}$  = 11.8 min.

(*R*)-5-methoxy-3-methyl-2-(1,1,1-trifluoro-2-(1*H*-indol-3-yl)pent-4-en-2-yl)-1*H*-indole (**3am**)

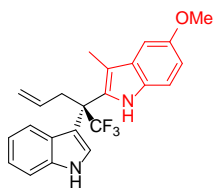

colorless oil, 10 d, 62% yield, 78:22 *er*,  $[\alpha]_D^{20}$  = +2.67 ( $c$  = 0.16, MeOH). **<sup>1</sup>H NMR** (500 MHz,  $\text{CDCl}_3$ )  $\delta$ : 8.24 (s, 1H), 8.02 (s, 1H), 7.42-7.31 (m, 2H), 7.20-7.13 (m, 2H), 6.97 (s, 1H), 6.94-6.76 (m, 3H), 5.61 (td,  $J$  = 16.6, 7.3 Hz, 1H), 5.04 (d,  $J$  = 17.1 Hz, 1H), 4.91 (d,  $J$  = 10.1 Hz, 1H), 3.87 (s, 3H), 3.43 (d,  $J$  = 6.8 Hz, 2H), 2.02 (s, 3H). **<sup>13</sup>C NMR** (126 MHz,  $\text{CDCl}_3$ )  $\delta$ : 154.0, 136.3, 133.4, 130.4, 130.0, 129.9, 128.0 (q,  $J$  = 285.7 Hz), 126.2, 123.7 (d,  $J$  = 1.5 Hz), 122.5, 120.9, 120.2, 118.1, 112.6, 112.4, 111.7, 111.3, 110.9, 100.5, 56.0, 51.1 (q,  $J$  = 25.4 Hz), 39.5, 10.0. **<sup>19</sup>F NMR** (471 MHz,  $\text{CDCl}_3$ )  $\delta$ : -68.29. IR (ATR)  $\nu_{\max}$ : 3410, 2926, 1458, 1164, 1131, 1109, 743  $\text{cm}^{-1}$ . **HRMS** (ESI):  $m/z$  calcd. for  $\text{C}_{23}\text{H}_{21}\text{N}_2\text{OF}_3$  [M-H]<sup>-</sup>: 397.1533; found: 397.1520. **HPLC analysis**: The enantiomeric excess was determined by HPLC with Chiralpak IA column (hexane/*i*-PrOH = 90/10, flow rate 0.8  $\text{mL}\cdot\text{min}^{-1}$ ,  $\lambda$  = 254 nm):  $t_{\text{major}}$  = 15.6 min,  $t_{\text{minor}}$  = 13.8 min.

(*R*)-3-(2,2,2-trifluoro-1-phenyl-1-(1*H*-pyrrol-2-yl)ethyl)-1*H*-indole (**3an**)

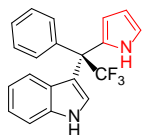

white foam, 5 d, 82% yield, 98:2 *er*,  $[\alpha]_D^{20}$  = -6.67 ( $c$  = 0.12, MeOH). **<sup>1</sup>H NMR** (500 MHz,  $\text{CDCl}_3$ )  $\delta$ : 8.21 (s, 1H), 8.05 (s, 1H), 7.44-7.36 (m, 3H), 7.36-7.28 (m, 3H), 7.17 (t,  $J$  = 7.6 Hz, 1H), 7.11 (s, 1H), 6.92 (t,  $J$  = 7.6 Hz, 1H), 6.77 (d,  $J$  = 8.2 Hz, 1H), 6.71 (d,  $J$  = 1.2 Hz, 1H), 6.29-6.18 (m, 2H). **<sup>13</sup>C NMR** (126 MHz,  $\text{CDCl}_3$ )  $\delta$ : 138.6, 136.6, 129.4, 129.4, 128.6, 128.3, 128.1, 127.5 (q,  $J$  = 285.0 Hz), 126.3, 125.6 (d,  $J$  = 1.9 Hz), 122.5, 121.7, 120.3,

117.9, 114.3, 111.4, 110.3, 108.5, 55.9 (q,  $J = 26.5$  Hz).  $^{19}\text{F}$  NMR (471 MHz,  $\text{CDCl}_3$ )  $\delta$ : -65.39. IR (ATR)  $\nu_{\text{max}}$ : 3416, 1231, 1148, 1098, 741, 719  $\text{cm}^{-1}$ . HRMS (ESI):  $m/z$  calcd. for  $\text{C}_{20}\text{H}_{15}\text{N}_2\text{F}_3$  [M-H] $^-$ : 339.1115; found: 339.1103. HPLC analysis: The enantiomeric excess was determined by HPLC with Chiralpak IA column (hexane/*i*-PrOH = 98/2, flow rate 0.8 mL·min $^{-1}$ ,  $\lambda = 254$  nm):  $t_{\text{major}} = 70.0$  min,  $t_{\text{minor}} = 67.3$  min.

#### d. General Procedure to Prepare Racemic Products 5a~5r

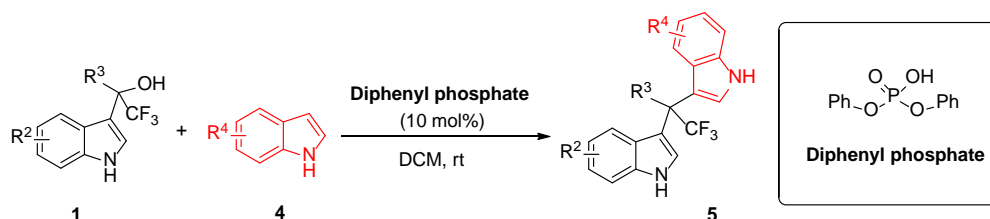

To a solution of  $\alpha$ -indolyl propargylic alcohol **1** (0.10 mmol, 1.0 equiv.), and catalyst diphenyl phosphate (0.01 mmol, 10 mol%) in DCM (1 mL) was added indole **4** (0.12 mmol, 1.2 equiv.). The mixture was stirred at room temperature until the reaction was completed (monitored by TLC analysis). The crude product was purified directly by flash column chromatography on silica gel (petroleum ether/ 1,2-dichloroethane = 3:2~1:1) to give the desired racemic products **5a-5r**.

#### e. General Procedure to Prepare Enantioenriched Products 5a~5r

Conditions A:

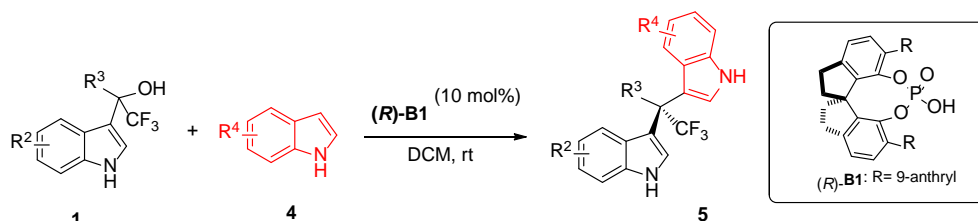

To a solution of  $\alpha$ -indolyl propargylic alcohol **1** (0.10 mmol, 1.0 equiv.) and catalyst (*R*)-**B1** (0.01 mmol, 10 mol%) in DCM (1 mL) was added indole **4** (0.12 mmol, 1.2 equiv.). The mixture was stirred at room temperature until the reaction was completed (monitored by TLC analysis). The crude product was purified directly by flash column chromatography on silica gel (petroleum ether/ 1,2-dichloroethane = 3:2~1:1) to give the desired chiral products **5a-5m**, **5o-5q**.

Conditions B:

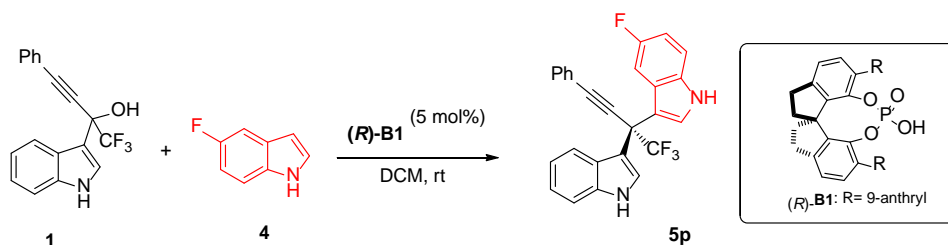

To a solution of  $\alpha$ -indolyl propargylic alcohol **1** (0.10 mmol, 1.0 equiv.) and catalyst (*R*)-**B1** (0.005 mmol, 5 mol%) in DCM (1 mL) was added 5-fluoro-1*H*-indole **4** (0.12 mmol, 1.2 equiv.). The mixture was stirred at room temperature until the reaction was completed (monitored by TLC analysis). The crude product was purified directly by flash column chromatography on silica gel (petroleum ether/ethyl acetate = 10:1) to give the desired

chiral products **5n**.

### Conditions C:

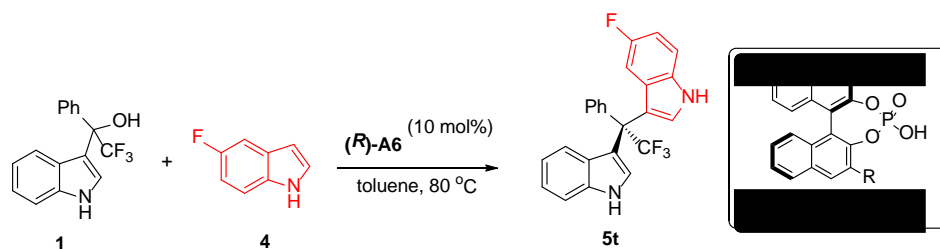

To a solution of  $\alpha$ -indolyl propargylic alcohol **1** (0.10 mmol, 1.0 equiv.) and catalyst (*R*)-**A6** (0.01 mmol, 10 mol%) in toluene (1 mL) was added 5-fluoro-1*H*-indole **4** (0.12 mmol, 1.2 equiv.). The mixture was stirred at 80 °C until the reaction was completed (monitored by TLC analysis). The crude product was purified directly by flash column chromatography on silica gel (petroleum ether/ethyl acetate = 10:1) to give the desired chiral products **5r**.

### f. Analytical Data for Products 5a~5r

(*S*)-5-fluoro-3-(1,1,1-trifluoro-2-(1*H*-indol-3-yl)-5,5-dimethylhex-3-yn-2-yl)-1*H*-indole (**5a**)

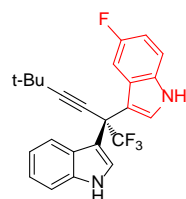

white foam, 4 d, 92% yield, 97:3 *er*,  $[\alpha]_D^{20} = -20.71$  ( $c = 0.14$ , MeOH). **<sup>1</sup>H NMR** (500 MHz, CDCl<sub>3</sub>)  $\delta$ : 8.06 (s, 1H), 8.02 (s, 1H), 7.63 (d,  $J = 8.1$  Hz, 1H), 7.34 (t,  $J = 10.7$  Hz, 2H), 7.21 (dd,  $J = 9.1, 3.6$  Hz, 3H), 7.16 (t,  $J = 7.6$  Hz, 1H), 6.99 (t,  $J = 7.6$  Hz, 1H), 6.89 (td,  $J = 8.9, 2.0$  Hz, 1H), 1.27 (s, 9H). **<sup>13</sup>C NMR** (126 MHz, CDCl<sub>3</sub>)  $\delta$ : 157.6 (d,  $J = 234.0$  Hz), 136.7, 133.1, 126.6 (d,  $J = 10.7$  Hz), 126.3 (q,  $J = 284.2$  Hz), 126.0, 125.9, 124.0, 122.3, 121.6, 119.6, 113.1 (d,  $J = 4.9$  Hz), 112.5, 111.8 (d,  $J = 9.8$  Hz), 111.3, 110.8 (d,  $J = 26.6$  Hz), 106.6 (d,  $J = 25.0$  Hz), 94.0, 75.4, 45.9 (q,  $J = 30.7$  Hz), 30.8, 27.8. **<sup>19</sup>F NMR** (471 MHz, CDCl<sub>3</sub>)  $\delta$ : -71.54, -124.21. IR (ATR)  $\nu_{max}$ : 3408, 2977, 1249, 1237, 1144, 1115, 740 cm<sup>-1</sup>. **HRMS** (ESI):  $m/z$  calcd. for C<sub>24</sub>H<sub>20</sub>N<sub>2</sub>F<sub>4</sub> [M-H]<sup>-</sup>: 411.1490; found: 411.1479. **HPLC analysis**: The enantiomeric excess was determined by HPLC with Chiralpak IA column (hexane/*i*-PrOH = 95/5, flow rate 1 mL·min<sup>-1</sup>,  $\lambda = 280$  nm):  $t_{major} = 69.4$  min,  $t_{minor} = 74.3$  min.

(*S*)-5-chloro-3-(1,1,1-trifluoro-2-(1*H*-indol-3-yl)-5,5-dimethylhex-3-yn-2-yl)-1*H*-indole (**5b**)

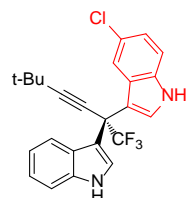

white foam, 4 d, 86% yield, 95:5 *er*,  $[\alpha]_D^{20} = -30.59$  ( $c = 0.17$ , MeOH). **<sup>1</sup>H NMR** (500 MHz, CDCl<sub>3</sub>)  $\delta$ : 7.98 (s, 1H), 7.94 (s, 1H), 7.79 (s, 1H), 7.67 (d,  $J = 8.1$  Hz, 1H), 7.31 (d,  $J = 8.2$  Hz, 1H), 7.17 (t,  $J = 7.1$  Hz, 2H), 7.15 – 7.09 (m, 2H), 7.07 (s, 1H), 7.03 (t,  $J = 7.6$  Hz, 1H), 1.27 (s, 9H). **<sup>13</sup>C NMR** (126 MHz, CDCl<sub>3</sub>)  $\delta$ : 136.7, 134.9, 127.2, 126.2 (q,  $J = 284.8$  Hz), 125.9, 125.5, 125.4, 124.1 (d,  $J = 1.1$  Hz), 122.6, 122.3, 121.6, 121.1, 119.6, 112.6, 112.5, 112.3, 111.4, 94.2, 75.4, 45.8 (q,  $J = 31.0$  Hz), 30.7, 27.9. **<sup>19</sup>F NMR** (376 MHz, CDCl<sub>3</sub>)  $\delta$ : -71.51. IR (ATR)  $\nu_{max}$ : 3404, 2968, 1257, 1246, 1142, 1110, 742 cm<sup>-1</sup>. **HRMS** (ESI):  $m/z$  calcd. for C<sub>24</sub>H<sub>20</sub>N<sub>2</sub>F<sub>3</sub>Cl [M-H]<sup>-</sup>: 427.1194;

found: 427.1196. **HPLC analysis:** The enantiomeric excess was determined by HPLC with Chiralpak AD-H column (hexane/*i*-PrOH = 90/10, flow rate 1 mL·min<sup>-1</sup>, λ = 280 nm): *t*<sub>major</sub> = 20.0 min, *t*<sub>minor</sub> = 19.1 min.

(*S*)-5-bromo-3-(1,1,1-trifluoro-2-(1*H*-indol-3-yl)-5,5-dimethylhex-3-yn-2-yl)-1*H*-indole (**5c**)

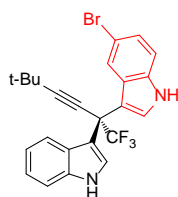

white foam, 4 d, 89% yield, 95:5 *er*,  $[\alpha]_D^{20} = -24.50$  (c = 0.20, MeOH). **<sup>1</sup>H NMR** (500 MHz, CDCl<sub>3</sub>) δ: 7.99 (s, 1H), 7.95 (s, 1H), 7.90 (s, 1H), 7.68 (d, *J* = 8.1 Hz, 1H), 7.30 (d, *J* = 8.1 Hz, 1H), 7.24 (d, *J* = 8.5 Hz, 1H), 7.18 (t, *J* = 7.5 Hz, 1H), 7.12 (d, *J* = 8.8 Hz, 2H), 7.04 (t, *J* = 7.5 Hz, 1H), 7.00 (s, 1H), 1.28 (s, 9H). **<sup>13</sup>C NMR** (126 MHz, CDCl<sub>3</sub>) δ: 136.7, 135.2, 127.8, 126.2 (q, *J* = 284.3 Hz), 125.9, 125.4, 125.1, 124.2, 124.1, 122.3, 121.6, 119.6, 113.1, 112.7, 112.5, 112.5, 111.4, 94.3, 75.3, 45.8 (q, *J* = 30.5 Hz), 30.7, 27.9. **<sup>19</sup>F NMR** (376 MHz, CDCl<sub>3</sub>) δ: -71.53. IR (ATR)  $\nu_{max}$ : 3403, 2987, 1257, 1163, 1116, 740 cm<sup>-1</sup>. **HRMS** (ESI): *m/z* calcd. for C<sub>24</sub>H<sub>20</sub>N<sub>2</sub>F<sub>3</sub>Br [M-H]<sup>-</sup>: 471.0689; found: 471.0672. **HPLC analysis:** The enantiomeric excess was determined by HPLC with Chiralpak AD-H column (hexane/*i*-PrOH = 90/10, flow rate 1 mL·min<sup>-1</sup>, λ = 254 nm): *t*<sub>major</sub> = 20.5 min, *t*<sub>minor</sub> = 18.4 min.

(*S*)-5-methyl-3-(1,1,1-trifluoro-2-(1*H*-indol-3-yl)-5,5-dimethylhex-3-yn-2-yl)-1*H*-indole (**5d**)

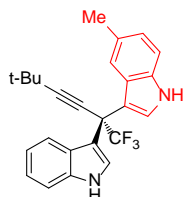

white foam, 6 d, 80% yield, 92:8 *er*,  $[\alpha]_D^{20} = +2.73$  (c = 0.11, MeOH). **<sup>1</sup>H NMR** (500 MHz, CDCl<sub>3</sub>) δ: 7.82 (s, 1H), 7.76 (d, *J* = 8.2 Hz, 1H), 7.73 (s, 1H), 7.61 (s, 1H), 7.24 (t, *J* = 7.8 Hz, 1H), 7.15 (t, *J* = 7.5 Hz, 2H), 7.02 (t, *J* = 7.5 Hz, 2H), 6.97 (d, *J* = 8.3 Hz, 1H), 6.94 (s, 1H), 2.36 (s, 3H), 1.24 (s, 9H). **<sup>13</sup>C NMR** (126 MHz, CDCl<sub>3</sub>) δ: 136.6, 134.9, 128.7, 126.4 (q, *J* = 284.3 Hz), 126.4, 126.1, 124.4, 124.2, 123.8, 122.1, 121.9, 121.4, 119.5, 112.9, 112.1, 111.2, 110.9, 93.7, 75.8, 45.9 (q, *J* = 30.8 Hz), 30.8, 27.8, 21.7. **<sup>19</sup>F NMR** (376 MHz, CDCl<sub>3</sub>) δ: -71.38. IR (ATR)  $\nu_{max}$ : 3406, 2966, 1251, 1242, 1163, 1101, 796, 743 cm<sup>-1</sup>. **HRMS** (ESI): *m/z* calcd. for C<sub>25</sub>H<sub>23</sub>N<sub>2</sub>F<sub>3</sub> [M-H]<sup>-</sup>: 407.1741; found: 407.1733. **HPLC analysis:** The enantiomeric excess was determined by HPLC with Chiralpak AD-H column (hexane/*i*-PrOH = 90/10, flow rate 1 mL·min<sup>-1</sup>, λ = 254 nm): *t*<sub>major</sub> = 17.1 min, *t*<sub>minor</sub> = 21.5 min.

(*S*)-6-fluoro-3-(1,1,1-trifluoro-2-(1*H*-indol-3-yl)-5,5-dimethylhex-3-yn-2-yl)-1*H*-indole (**5e**)

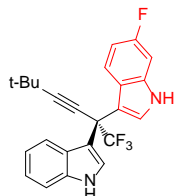

white foam, 4 d, 98% yield, 97:3 *er*,  $[\alpha]_D^{20} = -1.58$  (c = 0.19, MeOH). **<sup>1</sup>H NMR** (500 MHz, CDCl<sub>3</sub>) δ: 7.99 (s, 1H), 7.90 (s, 1H), 7.67 (d, *J* = 8.1 Hz, 1H), 7.64-7.54 (m, 1H), 7.31 (d, *J* = 8.2 Hz, 1H), 7.17 (d, *J* = 8.9 Hz, 2H), 7.09 (s, 1H), 7.02 (t, *J* = 7.5 Hz, 1H), 6.95 (d, *J* = 9.4 Hz, 1H), 6.76 (t, *J* = 9.2 Hz, 1H), 1.25 (s, 9H). **<sup>13</sup>C NMR** (126 MHz, CDCl<sub>3</sub>) δ: 159.9 (d, *J* = 238.2 Hz), 136.6, 136.5 (d, *J* = 12.3 Hz), 126.3 (q, *J* = 284.2 Hz), 126.0, 124.4,



124.2, 122.6, 122.5 (d,  $J = 9.8$  Hz), 122.3, 121.6, 119.6, 113.0, 112.6, 111.3, 108.5 (d,  $J = 24.1$  Hz), 97.4 (d,  $J = 25.9$  Hz), 93.9, 75.6, 45.9 (q,  $J = 30.8$  Hz), 30.8, 27.8.  **$^{19}\text{F}$  NMR** (471 MHz,  $\text{CDCl}_3$ )  $\delta$ : -71.50, -121.11. IR (ATR)  $\nu_{\text{max}}$ : 3404, 2964, 1249, 1159, 1111, 796, 739  $\text{cm}^{-1}$ . **HRMS** (ESI):  $m/z$  calcd. for  $\text{C}_{24}\text{H}_{20}\text{N}_2\text{F}_4$  [M-H] $^-$ : 411.1490; found: 411.1474. **HPLC analysis**: The enantiomeric excess was determined by HPLC with Chiralpak IA column (hexane/*i*-PrOH = 90/10, flow rate 0.8  $\text{mL}\cdot\text{min}^{-1}$ ,  $\lambda = 254$  nm):  $t_{\text{major}} = 22.7$  min,  $t_{\text{minor}} = 24.9$  min.

(*S*)-6-chloro-3-(1,1,1-trifluoro-2-(1*H*-indol-3-yl)-5,5-dimethylhex-3-yn-2-yl)-1*H*-indole (**5f**)

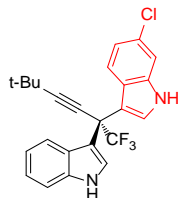

white foam, 4 d, 83% yield, 95:5 *er*,  $[\alpha]_D^{20} = +2.35$  ( $c = 0.17$ , MeOH).  **$^1\text{H}$  NMR** (500 MHz,  $\text{CDCl}_3$ )  $\delta$ : 7.98 (s, 1H), 7.88 (s, 1H), 7.65 (d,  $J = 8.1$  Hz, 1H), 7.59 (d,  $J = 8.6$  Hz, 1H), 7.30 (d,  $J = 8.1$  Hz, 1H), 7.24 (s, 1H), 7.20-7.14 (m, 2H), 7.08 (s, 1H), 7.02 (t,  $J = 7.5$  Hz, 1H), 6.97 (d,  $J = 8.6$  Hz, 1H), 1.25 (s, 9H).  **$^{13}\text{C}$  NMR** (126 MHz,  $\text{CDCl}_3$ )  $\delta$ : 136.9, 136.6, 128.2, 126.2 (q,  $J = 284.3$  Hz), 126.0, 124.8, 124.7, 124.1, 122.5, 122.3, 121.5, 120.4, 119.7, 113.1, 112.5, 111.4, 111.2, 94.0, 75.5, 45.8 (q,  $J = 31.0$  Hz), 30.8, 27.8.  **$^{19}\text{F}$  NMR** (376 MHz,  $\text{CDCl}_3$ )  $\delta$ : -71.52. IR (ATR)  $\nu_{\text{max}}$ : 3408, 2964, 1269, 1251, 1159, 1106, 791, 741  $\text{cm}^{-1}$ . **HRMS** (ESI):  $m/z$  calcd. for  $\text{C}_{24}\text{H}_{20}\text{N}_2\text{F}_3\text{Cl}$  [M-H] $^-$ : 427.1194; found: 427.1187. **HPLC analysis**: The enantiomeric excess was determined by HPLC with Chiralpak AD-H column (hexane/*i*-PrOH = 90/10, flow rate 1  $\text{mL}\cdot\text{min}^{-1}$ ,  $\lambda = 254$  nm):  $t_{\text{major}} = 37.2$  min,  $t_{\text{minor}} = 25.5$  min.

(*S*)-6-methyl-3-(1,1,1-trifluoro-2-(1*H*-indol-3-yl)-5,5-dimethylhex-3-yn-2-yl)-1*H*-indole (**5g**)

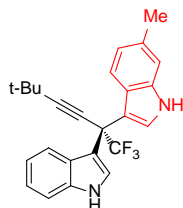

white foam, 6 d, 81% yield, 94.5:5.5 *er*,  $[\alpha]_D^{20} = +9.00$  ( $c = 0.10$ , MeOH).  **$^1\text{H}$  NMR** (500 MHz,  $\text{CDCl}_3$ )  $\delta$ : 7.84 (s, 1H), 7.75 (d,  $J = 8.1$  Hz, 1H), 7.71 (s, 1H), 7.62 (d,  $J = 8.2$  Hz, 1H), 7.27 (d,  $J = 8.1$  Hz, 1H), 7.17 (t,  $J = 7.5$  Hz, 1H), 7.08 (s, 1H), 7.06-7.01 (m, 2H), 7.00 (s, 1H), 6.88 (d,  $J = 8.3$  Hz, 1H), 2.44 (s, 3H), 1.27 (s, 9H).  **$^{13}\text{C}$  NMR** (126 MHz,  $\text{CDCl}_3$ )  $\delta$ : 137.0, 136.6, 131.9, 126.4 (q,  $J = 284.2$  Hz), 126.1, 124.2, 123.9, 123.7, 122.1, 121.8, 121.4, 121.3, 119.5, 112.8, 112.6, 111.3, 111.2, 93.7, 75.7, 45.9 (q,  $J = 30.7$  Hz), 30.8, 27.8, 21.7.  **$^{19}\text{F}$  NMR** (471 MHz,  $\text{CDCl}_3$ )  $\delta$ : -71.43. IR (ATR)  $\nu_{\text{max}}$ : 3405, 2966, 1264, 1157, 1112, 801, 739  $\text{cm}^{-1}$ . **HRMS** (ESI):  $m/z$  calcd. for  $\text{C}_{25}\text{H}_{23}\text{N}_2\text{F}_3$  [M-H] $^-$ : 407.1741; found: 407.1730. **HPLC analysis**: The enantiomeric excess was determined by HPLC with Chiralpak AD-H column (hexane/*i*-PrOH = 80/20, flow rate 1  $\text{mL}\cdot\text{min}^{-1}$ ,  $\lambda = 280$  nm):  $t_{\text{major}} = 21.6$  min,  $t_{\text{minor}} = 12.8$  min.

(*S*)-5-bromo-3-(1,1,1-trifluoro-2-(5-fluoro-1*H*-indol-3-yl)-5,5-dimethylhex-3-yn-2-yl)-1*H*-indole (**5h**)

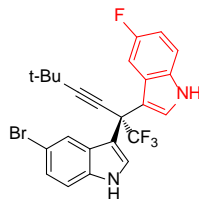

white foam, 7 d, 92% yield, 95:5 *er*,  $[\alpha]_D^{20} = +6.00$  ( $c = 0.20$ , MeOH). **<sup>1</sup>H NMR** (500 MHz, CDCl<sub>3</sub>)  $\delta$ : 7.98 (d,  $J = 8.6$  Hz, 2H), 7.85 (s, 1H), 7.27 (d,  $J = 10.3$  Hz, 1H), 7.20 (d,  $J = 8.7$  Hz, 1H), 7.18-7.08 (m, 3H), 7.07 (s, 1H), 6.88 (t,  $J = 8.8$  Hz, 1H), 1.24 (s, 9H). **<sup>13</sup>C NMR** (126 MHz, CDCl<sub>3</sub>)  $\delta$ : 157.6 (d,  $J = 234.0$  Hz), 135.2, 133.1, 127.7, 126.3 (d,  $J = 10.5$  Hz), 126.1 (q,  $J = 284.1$  Hz), 125.8, 125.3, 125.1, 124.0, 113.1, 112.8, 112.6 (d,  $J = 4.5$  Hz), 112.1 (d,  $J = 7.9$  Hz), 112.0, 110.9 (d,  $J = 26.5$  Hz), 106.3 (d,  $J = 24.8$  Hz), 94.6, 75.1, 45.7 (q,  $J = 31.2$  Hz), 30.7, 27.9. **<sup>19</sup>F NMR** (376 MHz, CDCl<sub>3</sub>)  $\delta$ : -71.56, -123.91. IR (ATR)  $\nu_{max}$ : 3411, 2974, 1252, 1148, 1109, 800, 742 cm<sup>-1</sup>. **HRMS** (ESI):  $m/z$  calcd. for C<sub>24</sub>H<sub>19</sub>N<sub>2</sub>F<sub>4</sub>Br [M-H]<sup>-</sup>: 489.0595; found: 489.0595. **HPLC analysis**: The enantiomeric excess was determined by HPLC with Chiralpak OD-OD column (hexane/*i*-PrOH = 90/10, flow rate 0.8 mL·min<sup>-1</sup>,  $\lambda = 254$  nm):  $t_{major} = 28.1$  min,  $t_{minor} = 30.0$  min.

(*S*)-5-fluoro-3-(1,1,1-trifluoro-2-(5-methoxy-1*H*-indol-3-yl)-5,5-dimethylhex-3-yn-2-yl)-1*H*-indole (**5i**)

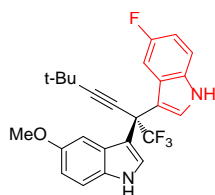

white solid, 7 d, 91% yield, 93:7 *er*, M.p. 119.8-121.1 °C.  $[\alpha]_D^{20} = -12.22$  ( $c = 0.18$ , MeOH). **<sup>1</sup>H NMR** (500 MHz, CDCl<sub>3</sub>)  $\delta$ : 8.00 (d,  $J = 15.1$  Hz, 2H), 7.33 (d,  $J = 10.1$  Hz, 1H), 7.22-7.10 (m, 4H), 7.08 (s, 1H), 6.94-6.85 (m, 1H), 6.83 (dd,  $J = 8.7, 1.5$  Hz, 1H), 3.72 (s, 3H), 1.27 (s, 9H). **<sup>13</sup>C NMR** (126 MHz, CDCl<sub>3</sub>)  $\delta$ : 157.6 (d,  $J = 233.8$  Hz), 153.7, 133.1, 131.9, 126.6, 126.5, 126.3 (q,  $J = 284.1$  Hz), 125.8, 124.9, 112.8 (d,  $J = 4.7$  Hz), 112.3, 112.0, 111.9, 111.8 (d,  $J = 9.7$  Hz), 110.7 (d,  $J = 26.5$  Hz), 106.5 (d,  $J = 24.9$  Hz), 103.7, 94.0, 75.3, 56.0, 45.8 (q,  $J = 30.7$  Hz), 30.9, 27.8. **<sup>19</sup>F NMR** (376 MHz, CDCl<sub>3</sub>)  $\delta$ : -71.42, -124.20. IR (ATR)  $\nu_{max}$ : 3407, 2971, 1246, 1239, 1154, 794, 740 cm<sup>-1</sup>. **HRMS** (ESI):  $m/z$  calcd. for C<sub>25</sub>H<sub>22</sub>N<sub>2</sub>OF<sub>4</sub> [M-H]<sup>-</sup>: 441.1595; found: 441.1578. **HPLC analysis**: The enantiomeric excess was determined by HPLC with Chiralpak AS-H column (hexane/*i*-PrOH = 90/10, flow rate 1 mL·min<sup>-1</sup>,  $\lambda = 254$  nm):  $t_{major} = 27.6$  min,  $t_{minor} = 16.9$  min.

(*S*)-6-fluoro-3-(1,1,1-trifluoro-2-(5-fluoro-1*H*-indol-3-yl)-5,5-dimethylhex-3-yn-2-yl)-1*H*-indole (**5j**)

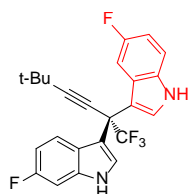

white foam, 10 d, 86% yield, 90:10 *er*,  $[\alpha]_D^{20} = -17.65$  ( $c = 0.17$ , MeOH). **<sup>1</sup>H NMR** (500 MHz, CDCl<sub>3</sub>)  $\delta$ : 8.03 (s, 1H), 7.98 (s, 1H), 7.52 (dd,  $J = 8.6, 5.6$  Hz, 1H), 7.31 (d,  $J = 10.3$  Hz, 1H), 7.20 (d,  $J = 9.1$  Hz, 2H), 7.16 (s, 1H), 6.96 (d,  $J = 9.4$  Hz, 1H), 6.91 (dd,  $J = 12.5, 5.3$  Hz, 1H), 6.77 (dd,  $J = 13.0, 5.4$  Hz, 1H), 1.26 (s, 9H). **<sup>13</sup>C NMR** (126 MHz, CDCl<sub>3</sub>)  $\delta$ : 159.9 (d,  $J = 238.6$  Hz), 157.6 (d,  $J = 234.0$  Hz), 136.6 (d,  $J = 12.4$  Hz), 133.1, 126.4 (d,  $J = 10.6$  Hz), 126.2 (q,  $J = 284.2$  Hz), 125.9, 124.3, 122.5, 122.2 (d,  $J = 9.8$  Hz), 112.8 (d,  $J = 4.7$  Hz), 112.6, 111.9 (d,  $J = 9.7$  Hz), 110.9 (d,  $J = 26.5$  Hz), 108.6 (d,  $J = 24.2$  Hz), 106.4 (d,  $J = 24.9$  Hz), 97.5 (d,  $J = 25.9$  Hz), 94.2, 75.26, 5.77 (q,  $J = 30.8$  Hz), 30.7, 27.8. **<sup>19</sup>F NMR** (376 MHz, CDCl<sub>3</sub>)  $\delta$ : -71.58, -120.87, -123.97. IR (ATR)  $\nu_{max}$ : 3407, 2966, 1247, 1242, 1140, 1108, 797, 739 cm<sup>-1</sup>. **HRMS** (ESI):  $m/z$  calcd. for C<sub>24</sub>H<sub>19</sub>N<sub>2</sub>F<sub>5</sub> [M-H]<sup>-</sup>: 429.1396; found: 429.1384. **HPLC analysis**: The enantiomeric excess was determined by HPLC with Chiralpak IA column (hexane/*i*-PrOH = 90/10, flow rate 1 mL·min<sup>-1</sup>,  $\lambda = 280$  nm):  $t_{major} = 15.5$  min,  $t_{minor} = 17.1$  min.

(*S*)-6-chloro-3-(1,1,1-trifluoro-2-(5-fluoro-1*H*-indol-3-yl)-5,5-dimethylhex-3-yn-2-yl)-1*H*-indole (**5k**)

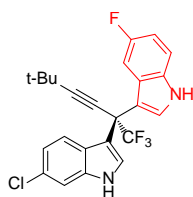

white foam, 10 d, 88% yield, 94:6 *er*,  $[a]_D^{20} = -18.33$  ( $c = 0.18$ , MeOH). **<sup>1</sup>H NMR** (500 MHz, CDCl<sub>3</sub>)  $\delta$ : 8.01 (s, 1H), 7.97 (s, 1H), 7.47 (d,  $J = 8.7$  Hz, 1H), 7.25 (d,  $J = 12.3$  Hz, 2H), 7.16 (dd,  $J = 9.9, 4.9$  Hz, 3H), 6.93 (d,  $J = 8.7$  Hz, 1H), 6.87 (t,  $J = 8.9$  Hz, 1H), 1.23 (s, 9H). **<sup>13</sup>C NMR** (126 MHz, CDCl<sub>3</sub>)  $\delta$ : 157.6 (d,  $J = 234.1$  Hz), 137.0, 133.1, 128.3, 126.4 (d,  $J = 10.6$  Hz), 126.1 (q,  $J = 284.2$  Hz), 125.8, 124.6, 124.6, 122.3, 120.5, 112.8, 112.7, 111.9 (d,  $J = 9.8$  Hz), 111.3, 110.9 (d,  $J = 26.6$  Hz), 106.3 (d,  $J = 24.9$  Hz), 94.3, 75.2, 45.7 (q,  $J = 31.3$  Hz), 30.7, 27.8. **<sup>19</sup>F NMR** (471 MHz, CDCl<sub>3</sub>)  $\delta$ : -71.60, -123.89. IR (ATR)  $\nu_{max}$ : 3408, 2967, 1253, 1248, 1167, 794, 743 cm<sup>-1</sup>. **HRMS** (ESI):  $m/z$  calcd. for C<sub>24</sub>H<sub>19</sub>N<sub>2</sub>F<sub>4</sub>Cl [M-H]<sup>-</sup>: 445.1100; found: 445.1085. **HPLC analysis**: The enantiomeric excess was determined by HPLC with Chiralpak IA column (hexane/*i*-PrOH = 90/10, flow rate 1 mL·min<sup>-1</sup>,  $\lambda = 254$  nm):  $t_{major} = 14.2$  min,  $t_{minor} = 19.5$  min.

(*S*)-5-fluoro-3-(1,1,1-trifluoro-2-(6-methoxy-1*H*-indol-3-yl)-5,5-dimethylhex-3-yn-2-yl)-1*H*-indole (**5I**)

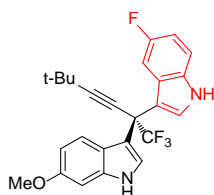

white foam, 4 d, 73% yield, 95:5 *er*,  $[a]_D^{20} = +30.77$  ( $c = 0.13$ , MeOH). **<sup>1</sup>H NMR** (500 MHz, CDCl<sub>3</sub>)  $\delta$ : 8.04 (s, 1H), 7.91 (s, 1H), 7.47 (d,  $J = 8.8$  Hz, 1H), 7.35 (d,  $J = 10.5$  Hz, 1H), 7.24-7.15 (m, 2H), 7.09 (s, 1H), 6.89 (t,  $J = 9.0$  Hz, 1H), 6.77 (s, 1H), 6.66 (d,  $J = 8.9$  Hz, 1H), 3.79 (s, 3H), 1.26 (s, 9H). **<sup>13</sup>C NMR** (126 MHz, CDCl<sub>3</sub>)  $\delta$ : 157.6 (d,  $J = 233.9$  Hz), 156.5, 137.4, 133.1, 126.6 (d,  $J = 10.7$  Hz), 126.3 (q,  $J = 284.3$  Hz), 125.9, 122.8, 122.1, 120.3, 113.1 (d,  $J = 4.5$  Hz), 112.5, 111.8 (d,  $J = 9.8$  Hz), 110.7 (d,  $J = 26.6$  Hz), 109.8, 106.5 (d,  $J = 25.0$  Hz), 94.4, 94.0, 75.5, 55.6, 45.8 (q,  $J = 30.9$  Hz), 30.8, 27.8. **<sup>19</sup>F NMR** (376 MHz, CDCl<sub>3</sub>)  $\delta$ : -71.54, -124.18. IR (ATR)  $\nu_{max}$ : 3406, 2960, 1254, 1245, 1172, 1103, 799, 740 cm<sup>-1</sup>. **HRMS** (ESI):  $m/z$  calcd. for C<sub>25</sub>H<sub>22</sub>N<sub>2</sub>O<sub>4</sub>F<sub>4</sub> [M-H]<sup>-</sup>: 441.1595; found: 441.1580. **HPLC analysis**: The enantiomeric excess was determined by HPLC with Chiralpak IA column (hexane/*i*-PrOH = 80/20, flow rate 1 mL·min<sup>-1</sup>,  $\lambda = 245$  nm):  $t_{major} = 7.2$  min,  $t_{minor} = 10.1$  min.

(*S*)-5-fluoro-3-(1,1,1-trifluoro-2-(1*H*-indol-3-yl)-4-(trimethylsilyl)but-3-yn-2-yl)-1*H*-indole (**5m**)

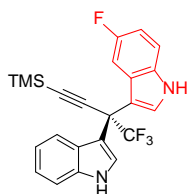

white foam, 3 d, 87% yield, 95:5 *er*,  $[a]_D^{20} = -18.67$  ( $c = 0.16$ , MeOH). **<sup>1</sup>H NMR** (500 MHz, CDCl<sub>3</sub>)  $\delta$ : 8.10 (s, 1H), 8.05 (s, 1H), 7.60 (d,  $J = 8.1$  Hz, 1H), 7.33 (d,  $J = 8.5$  Hz, 2H), 7.22 (dd,  $J = 9.9, 5.0$  Hz, 3H), 7.16 (t,  $J = 7.6$  Hz, 1H), 7.00 (t,  $J = 7.6$  Hz, 1H), 6.90 (td,  $J = 8.9, 2.2$  Hz, 1H), 0.20 (s, 9H). **<sup>13</sup>C NMR** (126 MHz, CDCl<sub>3</sub>)  $\delta$ : 157.7 (d,  $J = 234.1$  Hz), 136.6, 133.1, 126.5 (d,  $J = 10.7$  Hz), 126.1, 126.0 (q,  $J = 284.7$  Hz), 125.8, 124.2, 122.4, 121.5, 119.8, 112.1 (d,  $J = 4.7$  Hz), 111.8 (d,  $J = 9.8$  Hz), 111.5, 111.4, 111.0, 110.8, 106.5 (d,  $J = 24.9$  Hz), 101.3, 90.9, 46.8 (q,  $J = 30.7$  Hz), -0.2. **<sup>19</sup>F NMR** (471 MHz, CDCl<sub>3</sub>)  $\delta$ : -71.09, -123.97. IR (ATR)  $\nu_{max}$ : 3411, 2959, 2926, 1486, 1167, 843, 745 cm<sup>-1</sup>. **HRMS** (ESI):  $m/z$  calcd. for C<sub>23</sub>H<sub>20</sub>N<sub>2</sub>F<sub>4</sub>Si [M-H]<sup>-</sup>: 427.1259; found: 427.1258. **HPLC analysis**: The enantiomeric excess was determined by HPLC with Chiralpak IA column (hexane/*i*-PrOH =

90/10, flow rate 1 mL·min<sup>-1</sup>, λ = 245 nm): *t*<sub>major</sub> = 14.1 min, *t*<sub>minor</sub> = 12.3 min.

(*S*)-5-fluoro-3-(1,1,1-trifluoro-2-(1*H*-indol-3-yl)-4-phenylbut-3-yn-2-yl)-1*H*-indole (**5n**)

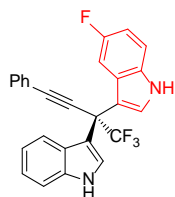

white foam, 3 d, 96% yield, 90:10 *er*,  $[\alpha]_D^{20} = -13.33$  (*c* = 0.16, MeOH). **<sup>1</sup>H NMR** (500 MHz, CDCl<sub>3</sub>) δ: 8.15 (s, 1H), 8.10 (s, 1H), 7.63 (d, *J* = 8.1 Hz, 1H), 7.48 (d, *J* = 7.2 Hz, 2H), 7.39-7.28 (m, 7H), 7.23 (dd, *J* = 8.8, 4.3 Hz, 1H), 7.17 (t, *J* = 7.6 Hz, 1H), 7.00 (t, *J* = 7.6 Hz, 1H), 6.90 (t, *J* = 8.9 Hz, 1H). **<sup>13</sup>C NMR** (126 MHz, CDCl<sub>3</sub>) δ: 157.7 (d, *J* = 234.3 Hz), 136.7, 133.1, 132.0, 128.8, 128.4, 126.5 (d, *J* = 10.6 Hz), 126.2 (q, *J* = 284.7 Hz), 126.1, 125.9, 124.2 (d, *J* = 1.4 Hz), 122.5, 122.4, 121.2, 120.0, 112.3 (d, *J* = 4.7 Hz), 111.9 (d, *J* = 9.8 Hz), 111.7, 111.4, 111.0, 110.8, 106.3 (d, *J* = 24.8 Hz), 85.8, 85.4, 46.6 (q, *J* = 31.4 Hz). **<sup>19</sup>F NMR** (471 MHz, CDCl<sub>3</sub>) δ: -70.98, -123.59. IR (ATR) *v*<sub>max</sub>: 3410, 2960, 2932, 1482, 1157, 849, 740 cm<sup>-1</sup>. **HRMS** (ESI): *m/z* calcd. for C<sub>26</sub>H<sub>16</sub>N<sub>2</sub>F<sub>4</sub> [M-H]: 431.1177; found: 431.1187. **HPLC analysis**: The enantiomeric excess was determined by HPLC with Chiralpak IA column (hexane/*i*-PrOH = 80/20, flow rate 1 mL·min<sup>-1</sup>, λ = 254 nm): *t*<sub>major</sub> = 9.1 min, *t*<sub>minor</sub> = 8.0 min.

(*S*)-5-fluoro-3-(1,1,1-trifluoro-2-(1*H*-indol-3-yl)-4-(triisopropylsilyl)but-3-yn-2-yl)-1*H*-indole (**5o**)

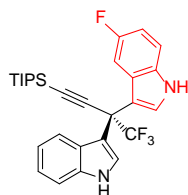

white foam, 5 d, 90% yield, 97:3 *er*,  $[\alpha]_D^{20} = -14.50$  (*c* = 0.20, MeOH). **<sup>1</sup>H NMR** (500 MHz, CDCl<sub>3</sub>) δ: 8.07 (s, 1H), 8.02 (s, 1H), 7.58 (d, *J* = 8.1 Hz, 1H), 7.35-7.26 (m, 4H), 7.21-7.09 (m, 2H), 6.96 (t, *J* = 7.5 Hz, 1H), 6.88 (t, *J* = 8.9 Hz, 1H), 1.07 (d, *J* = 4.4 Hz, 21H). **<sup>13</sup>C NMR** (126 MHz, CDCl<sub>3</sub>) δ: 157.6 (d, *J* = 234.1 Hz), 136.6, 133.1, 126.4 (d, *J* = 10.6 Hz), 126.1 (q, *J* = 284.7 Hz), 125.9, 125.8, 124.2, 122.3, 121.5, 119.7, 112.3 (d, *J* = 4.8 Hz), 111.8, 111.7, 111.3, 110.8 (d, *J* = 26.7 Hz), 106.6 (d, *J* = 24.8 Hz), 103.2, 87.3, 46.9 (q, *J* = 31.0 Hz), 18.7, 11.4. **<sup>19</sup>F NMR** (471 MHz, CDCl<sub>3</sub>) δ: -71.06, -124.16. IR (ATR) *v*<sub>max</sub>: 3415, 2944, 2888, 1457, 1167, 798 cm<sup>-1</sup>. **HRMS** (ESI): *m/z* calcd. for C<sub>29</sub>H<sub>32</sub>N<sub>2</sub>F<sub>4</sub>Si [M-H]: 511.2198; found: 511.2181. **HPLC analysis**: The enantiomeric excess was determined by HPLC with Chiralpak AD-H column (hexane/*i*-PrOH = 90/10, flow rate 0.8 mL·min<sup>-1</sup>, λ = 254 nm): *t*<sub>major</sub> = 9.5 min, *t*<sub>minor</sub> = 8.4 min.

(*S,E*)-5-fluoro-3-(1,1,1-trifluoro-2-(1*H*-indol-3-yl)-4-(trimethylsilyl)but-3-en-2-yl)-1*H*-indole (**5p**)

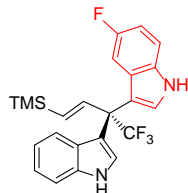

white foam, 10 d, 62% yield, 92:8 *er*,  $[\alpha]_D^{20} = -2.73$  (*c* = 0.11, MeOH). **<sup>1</sup>H NMR** (400 MHz, CDCl<sub>3</sub>) δ: 8.13 (d, *J* = 12.9 Hz, 2H), 7.37 (d, *J* = 8.2 Hz, 1H), 7.30-7.08 (m, 5H), 6.97-6.84 (m, 3H), 6.72 (d, *J* = 18.8 Hz, 1H), 5.98 (d, *J* = 18.8 Hz, 1H), 0.10 (s, 9H). **<sup>13</sup>C NMR** (126 MHz, CDCl<sub>3</sub>) δ: 157.5 (d, *J* = 233.6 Hz), 139.7, 136.6, 135.6, 133.1, 127.6 (q, *J* = 285.3 Hz), 127.0 (d, *J* = 10.6 Hz), 126.9, 126.4, 125.0, 122.2, 122.1, 119.5, 113.2 (d, *J* = 4.6 Hz),

112.6, 111.7 (d,  $J = 9.9$  Hz), 111.3, 110.6 (d,  $J = 26.6$  Hz), 107.2 (d,  $J = 24.7$  Hz), 54.8 (q,  $J = 26.2$  Hz), -1.3.  **$^{19}\text{F}$  NMR** (376 MHz,  $\text{CDCl}_3$ )  $\delta$ : -68.92, -124.24. IR (ATR)  $\nu_{\text{max}}$ : 3409, 2957, 2892, 1477, 1166, 849, 743  $\text{cm}^{-1}$ . **HRMS** (ESI):  $m/z$  calcd. for  $\text{C}_{23}\text{H}_{22}\text{N}_2\text{F}_4\text{Si}$  [M-H] $^-$ : 429.1416; found: 429.1406. **HPLC analysis**: The enantiomeric excess was determined by HPLC with Chiralpak IA column (hexane/*i*-PrOH = 90/10, flow rate 1  $\text{mL}\cdot\text{min}^{-1}$ ,  $\lambda = 254$  nm):  $t_{\text{major}} = 15.0$  min,  $t_{\text{minor}} = 11.6$  min.

(*S*)-5-fluoro-3-(1,1,1-trifluoro-2-(1*H*-indol-3-yl)hexan-2-yl)-1*H*-indole (**5q**)

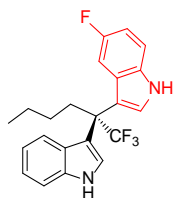

colorless oil, 9 d, 78% yield, 70:30 *er*,  $[\alpha]_D^{20} = -6.25$  ( $c = 0.10$ , MeOH).  **$^1\text{H}$  NMR** (400 MHz,  $\text{CDCl}_3$ )  $\delta$ : 8.10 (d,  $J = 12.4$  Hz, 2H), 7.40 – 7.27 (m, 3H), 7.21 (dd,  $J = 8.8, 4.5$  Hz, 1H), 7.15 – 7.03 (m, 2H), 6.82 (dd,  $J = 9.1, 6.7$  Hz, 2H), 6.71 (dd,  $J = 10.7, 1.8$  Hz, 1H), 2.63 (t,  $J = 7.3$  Hz, 2H), 1.27 (dd,  $J = 8.8, 4.9$  Hz, 4H), 0.81 (t,  $J = 6.7$  Hz, 3H).  **$^{13}\text{C}$  NMR** (126 MHz,  $\text{CDCl}_3$ )  $\delta$ : 157.4 (d,  $J = 233.2$  Hz), 136.4, 132.9, 128.7 (q,  $J = 285.2$  Hz), 127.2 (d,  $J = 10.3$  Hz), 126.6, 125.6, 123.9, 122.0, 121.3, 119.5, 114.8 (d,  $J = 4.4$  Hz), 113.9, 111.6 (d,  $J = 9.9$  Hz), 111.3, 110.5 (d,  $J = 26.6$  Hz), 106.4 (d,  $J = 24.6$  Hz), 49.7 (q,  $J = 25.5$  Hz), 35.3, 27.0, 23.4, 14.0.  **$^{19}\text{F}$  NMR** (376 MHz,  $\text{CDCl}_3$ )  $\delta$ : -69.25, -124.35. IR (ATR)  $\nu_{\text{max}}$ : 3419, 2959, 1484, 1456, 1151, 797, 743  $\text{cm}^{-1}$ . **HRMS** (ESI):  $m/z$  calcd. for  $\text{C}_{22}\text{H}_{20}\text{N}_2\text{F}_4$  [M-H] $^-$ : 387.1490; found: 387.1470. **HPLC analysis**: The enantiomeric excess was determined by HPLC with Chiralpak AD-H column (hexane/*i*-PrOH = 90/10, flow rate 1  $\text{mL}\cdot\text{min}^{-1}$ ,  $\lambda = 254$  nm):  $t_{\text{major}} = 18.4$  min,  $t_{\text{minor}} = 23.4$  min.

(*S*)-5-fluoro-3-(2,2,2-trifluoro-1-(1*H*-indol-3-yl)-1-phenylethyl)-1*H*-indole (**5r**)

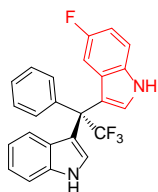

white foam, 10 h, 95% yield, 73:27 *er*,  $[\alpha]_D^{20} = -2.33$  ( $c = 0.30$ , MeOH).  **$^1\text{H}$  NMR** (500 MHz,  $\text{CDCl}_3$ )  $\delta$ : 8.08 (d,  $J = 16.5$  Hz, 2H), 7.54 (d,  $J = 7.3$  Hz, 2H), 7.39 (d,  $J = 8.4$  Hz, 1H), 7.36-7.30 (m, 3H), 7.31-7.26 (m, 1H), 7.19 (t,  $J = 7.3$  Hz, 2H), 7.04-6.90 (m, 4H), 6.86 (d,  $J = 10.8$  Hz, 1H).  **$^{13}\text{C}$  NMR** (126 MHz,  $\text{CDCl}_3$ )  $\delta$ : 157.7 (d,  $J = 233.7$  Hz), 139.0, 136.8, 133.3, 129.6 (d,  $J = 1.4$  Hz), 128.2, 128.2 (q,  $J = 286.3$  Hz), 128.2, 127.8, 126.9 (d,  $J = 10.3$  Hz), 126.4, 126.4, 122.3 (d,  $J = 2.8$  Hz), 122.3, 119.9, 115.7 (d,  $J = 4.5$  Hz), 115.3, 111.8 (d,  $J = 9.9$  Hz), 111.4, 110.8 (d,  $J = 26.5$  Hz), 107.5 (d,  $J = 3.3$  Hz), 107.3 (d,  $J = 3.0$  Hz), 55.9 (q,  $J = 26.9$  Hz).  **$^{19}\text{F}$  NMR** (471 MHz,  $\text{CDCl}_3$ )  $\delta$ : -62.60, -123.68. IR (ATR)  $\nu_{\text{max}}$ : 3416, 2926, 1712, 1483, 1145, 741  $\text{cm}^{-1}$ . **HRMS** (ESI):  $m/z$  calcd. for  $\text{C}_{24}\text{H}_{16}\text{N}_2\text{F}_4$  [M+H] $^+$ : 407.1177; found: 407.1178. **HPLC analysis**: The enantiomeric excess was determined by HPLC with Chiralpak IA column (hexane/*i*-PrOH = 90/10, flow rate 1  $\text{mL}\cdot\text{min}^{-1}$ ,  $\lambda = 254$  nm):  $t_{\text{major}} = 29.1$  min,  $t_{\text{minor}} = 35.0$  min.

## g. General Procedure to Prepare Racemic Products 7a~7x

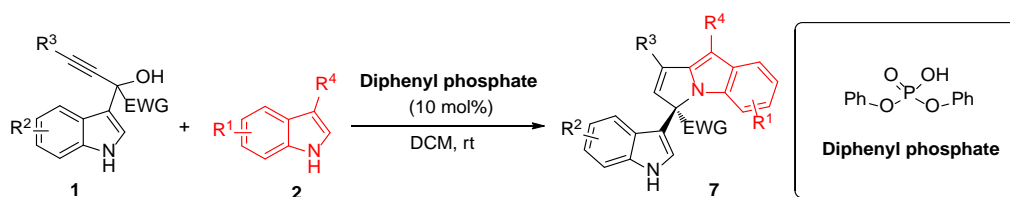

To a solution of  $\alpha$ -indolyl propargylic alcohol **1** (0.10 mmol, 1.0 equiv.), and catalyst diphenyl phosphate (0.01 mmol, 10 mol%) in DCM (1 mL) was added indole **2** (0.12 mmol, 1.2 equiv.). The mixture was stirred at room temperature until the reaction was completed (monitored by TLC analysis). The crude product was purified directly by flash column chromatography on silica gel (petroleum ether/ ethyl acetate = 20:1~10:1) to give the desired racemic products **7a~7x**.

## h. General Procedure to Prepare Enantioenriched Products **7a~7x**

### Conditions A:

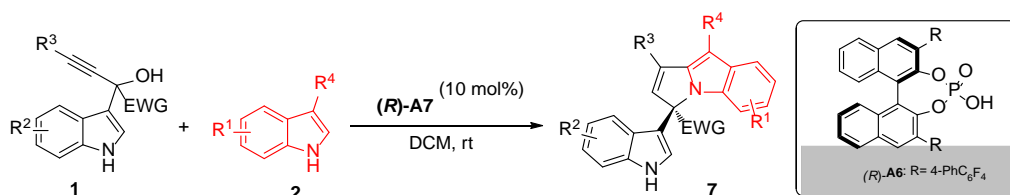

To a solution of  $\alpha$ -indolyl propargylic alcohol **1** (0.10 mmol, 1.0 equiv.) and catalyst (*R*)-**A7** (0.01 mmol, 10 mol%) in DCM (1 mL) was added indole **2** (0.12 mmol, 1.2 equiv.). The mixture was stirred at room temperature until the reaction was completed (monitored by TLC analysis). The crude product was purified directly by flash column chromatography on silica gel (petroleum ether/ ethyl acetate = 20:1~10:1) to give the desired chiral products **7a~7x**.

## i. Analytical Data for Products **7a~7x**

(*R*)-3-(1*H*-indol-3-yl)-9-methyl-1-phenyl-3-(trifluoromethyl)-3*H*-pyrrolo[1,2-*a*]indole (**7a**)

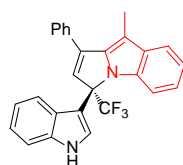

colorless oil, 13 h, 86% yield, 97:3 *er*,  $[\alpha]_D^{20} = +380.00$  ( $c = 0.15$ , MeOH). **<sup>1</sup>H NMR** (500 MHz, CDCl<sub>3</sub>)  $\delta$ : 8.21 (s, 1H), 7.71-7.65 (m, 2H), 7.63 (d,  $J = 7.9$  Hz, 1H), 7.55-7.37 (m, 4H), 7.31 (d,  $J = 8.1$  Hz, 1H), 7.19-6.99 (m, 4H), 6.88 (t,  $J = 7.5$  Hz, 1H), 6.80 (d,  $J = 8.1$  Hz, 1H), 6.41 (s, 1H), 2.41 (s, 3H). **<sup>13</sup>C NMR** (126 MHz, CDCl<sub>3</sub>)  $\delta$ : 141.2, 140.9, 136.3, 134.8, 134.0, 133.0, 129.4, 129.0, 128.7, 128.3, 125.5 (q,  $J = 286.5$  Hz), 125.4, 123.7 (d,  $J = 2.6$  Hz), 122.9, 122.7, 120.6, 120.1, 119.5, 119.4, 111.4, 110.6 (d,  $J = 2.1$  Hz), 108.0, 105.2, 70.3 (q,  $J = 31.4$  Hz), 9.6. **<sup>19</sup>F NMR** (471 MHz, CDCl<sub>3</sub>)  $\delta$ : -72.27. IR (ATR)  $\nu_{max}$ : 3410, 2923, 1454, 1171, 895, 739 cm<sup>-1</sup>. **HRMS** (ESI):  $m/z$  calcd. for C<sub>27</sub>H<sub>19</sub>N<sub>2</sub>F<sub>3</sub> [M+H]<sup>+</sup>: 429.1573; found: 429.1578. **HPLC analysis**: The enantiomeric excess was determined by HPLC with Chiralpak IA column (hexane/*i*-PrOH = 90/10, flow rate 1 mL·min<sup>-1</sup>,  $\lambda = 254$  nm):  $t_{major} = 10.4$  min,  $t_{minor} = 8.0$  min.

(*R*)-8-bromo-3-(1*H*-indol-3-yl)-9-methyl-1-phenyl-3-(trifluoromethyl)-3*H*-pyrrolo[1,2-*a*]indole (**7b**)

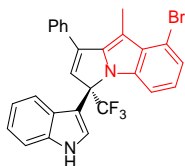

colorless oil, 19 h, 45% yield, 98:2 *er*,  $[\alpha]_D^{20} = +198.00$  ( $c = 0.10$ , MeOH). **<sup>1</sup>H NMR** (400 MHz, CDCl<sub>3</sub>)  $\delta$ : 8.33 (s, 1H), 7.61 (dt,  $J = 4.6, 2.6$  Hz, 2H), 7.54-7.49 (m, 1H), 7.49-7.41 (m, 3H), 7.35 (d,  $J = 8.2$  Hz, 1H), 7.20-7.08 (m, 2H), 7.02 (d,  $J = 8.3$  Hz, 1H), 6.92-6.84 (m, 1H), 6.78 (t,  $J = 7.9$  Hz, 1H), 6.68 (d,  $J = 8.1$  Hz, 1H), 6.34 (s, 1H), 2.58 (s, 3H). **<sup>13</sup>C NMR** (126 MHz, CDCl<sub>3</sub>)  $\delta$ : 142.1, 141.3, 136.3, 136.1, 132.8, 131.0, 130.4, 129.1, 128.7, 128.5, 125.3, 125.2 (q,  $J = 286.1$  Hz), 124.3, 123.7, 123.6 (d,  $J = 2.8$  Hz), 122.9, 120.9, 119.3, 115.5, 111.5, 109.8 (d,  $J = 2.3$  Hz), 107.3, 106.8, 70.7 (q,  $J = 31.4$  Hz), 12.1. **<sup>19</sup>F NMR** (376 MHz, CDCl<sub>3</sub>)  $\delta$ : -72.12. IR (ATR)  $\nu_{max}$ : 3410, 2947, 1456, 1157, 889, 740 cm<sup>-1</sup>. **HRMS** (ESI):  $m/z$  calcd. for C<sub>27</sub>H<sub>18</sub>N<sub>2</sub>F<sub>3</sub>Br [M+H]<sup>+</sup>: 507.0678; found: 507.0674. **HPLC analysis**: The enantiomeric excess was determined by HPLC with Chiralpak AD-H column (hexane/*i*-PrOH = 95/5, flow rate 0.8 mL·min<sup>-1</sup>,  $\lambda = 254$  nm):  $t_{major} = 22.0$  min,  $t_{minor} = 29.4$  min.

(*R*)-7-fluoro-3-(1*H*-indol-3-yl)-9-methyl-1-phenyl-3-(trifluoromethyl)-3*H*-pyrrolo[1,2-*a*]indole (**7c**)

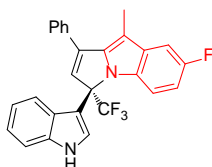

colorless oil, 13 h, 60% yield, 96.5:3.5 *er*,  $[\alpha]_D^{20} = +315.45$  ( $c = 0.11$ , MeOH). **<sup>1</sup>H NMR** (400 MHz, CDCl<sub>3</sub>)  $\delta$ : 8.31 (s, 1H), 7.68-7.62 (m, 2H), 7.52-7.43 (m, 4H), 7.34 (d,  $J = 8.2$  Hz, 1H), 7.22 (dd,  $J = 9.6, 2.5$  Hz, 1H), 7.15-7.09 (m, 1H), 7.00 (dd,  $J = 8.6, 4.4$  Hz, 1H), 6.89-6.83 (m, 1H), 6.75 (td,  $J = 9.1, 2.5$  Hz, 1H), 6.67 (d,  $J = 8.1$  Hz, 1H), 6.39 (s, 1H), 2.34 (s, 3H). **<sup>13</sup>C NMR** (126 MHz, CDCl<sub>3</sub>)  $\delta$ : 157.8 (d,  $J = 234.8$  Hz), 142.6, 141.2, 136.3, 134.5 (d,  $J = 9.3$  Hz), 132.8, 131.3, 129.8, 129.2, 128.7, 128.3, 125.4 (q,  $J = 286.2$  Hz), 125.3, 123.6 (d,  $J = 2.7$  Hz), 122.9, 120.7, 119.4, 111.5, 111.2, 111.0 (d,  $J = 7.1$  Hz), 111.0, 107.8, 105.3, 105.2 (d,  $J = 4.8$  Hz), 105.1, 70.4 (q,  $J = 31.3$  Hz), 9.7. **<sup>19</sup>F NMR** (376 MHz, CDCl<sub>3</sub>)  $\delta$ : -72.46, -124.68 (td,  $J = 9.4, 4.5$  Hz). IR (ATR)  $\nu_{max}$ : 3411, 2957, 1466, 1149, 893, 739 cm<sup>-1</sup>. **HRMS** (ESI):  $m/z$  calcd. for C<sub>27</sub>H<sub>18</sub>N<sub>2</sub>F<sub>4</sub> [M+H]<sup>+</sup>: 447.1479; found: 447.1482. **HPLC analysis**: The enantiomeric excess was determined by HPLC with Chiralpak IA column (hexane/*i*-PrOH = 90/10, flow rate 0.8 mL·min<sup>-1</sup>,  $\lambda = 254$  nm):  $t_{major} = 9.7$  min,  $t_{minor} = 11.7$  min.

(*R*)-7-chloro-3-(1*H*-indol-3-yl)-9-methyl-1-phenyl-3-(trifluoromethyl)-3*H*-pyrrolo[1,2-*a*]indole (**7d**)

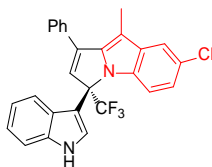

light brown foam, 13 h, 76% yield, 96:4 *er*,  $[\alpha]_D^{20} = +331.00$  ( $c = 0.10$ , MeOH). **<sup>1</sup>H NMR** (500 MHz, CDCl<sub>3</sub>)  $\delta$ : 8.31 (s, 1H), 7.66-7.62 (m, 2H), 7.54 (d,  $J = 1.3$  Hz, 1H), 7.50 (s, 1H), 7.45 (dd,  $J = 12.2, 6.3$  Hz, 3H), 7.35 (d,  $J = 8.2$  Hz, 1H), 7.12 (dd,  $J = 13.9, 6.2$  Hz, 1H), 7.03-6.92 (m, 2H), 6.85 (t,  $J = 7.6$  Hz, 1H), 6.64 (d,  $J = 8.2$  Hz, 1H), 6.38 (s, 1H), 2.34 (s, 3H). **<sup>13</sup>C NMR** (126 MHz, CDCl<sub>3</sub>)  $\delta$ : 142.2, 141.1, 136.3, 135.1, 133.1, 132.7, 129.9, 129.2, 128.7, 128.3, 125.3 (q,  $J = 286.1$  Hz), 125.3, 125.3, 123.6 (d,  $J = 2.7$  Hz), 123.2, 122.9, 120.8, 119.6, 119.3, 111.5, 111.4 (d,  $J = 2.1$  Hz), 107.6, 104.9, 70.4 (q,  $J = 31.6$  Hz), 9.6. **<sup>19</sup>F NMR** (471 MHz, CDCl<sub>3</sub>)  $\delta$ : -72.47. IR (ATR)  $\nu_{max}$ : 3408, 2952, 1464, 1157, 896, 738 cm<sup>-1</sup>. **HRMS** (ESI):  $m/z$  calcd. for C<sub>27</sub>H<sub>18</sub>N<sub>2</sub>F<sub>3</sub>Cl [M+H]<sup>+</sup>: 463.1183;

found: 463.1189. **HPLC analysis:** The enantiomeric excess was determined by HPLC with Chiralpak IA column (hexane/*i*-PrOH = 90/10, flow rate 0.8 mL · min<sup>-1</sup>, λ = 254 nm): *t*<sub>major</sub> = 9.3 min, *t*<sub>minor</sub> = 10.9 min.

(*R*)-7-bromo-3-(1*H*-indol-3-yl)-9-methyl-1-phenyl-3-(trifluoromethyl)-3*H*-pyrrolo[1,2-*a*]indole (**7e**)

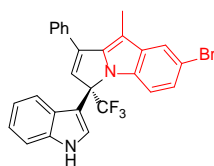

colorless oil, 19 h, 45% yield, 97.5:2.5 *er*,  $[α]_D^{20} = +307.00$  (c = 0.10, MeOH). **<sup>1</sup>H NMR** (400 MHz, CDCl<sub>3</sub>) δ: 8.32 (s, 1H), 7.70 (d, *J* = 1.8 Hz, 1H), 7.64 (dd, *J* = 7.6, 1.9 Hz, 2H), 7.47 (ddd, *J* = 6.5, 5.4, 2.8 Hz, 4H), 7.38-7.29 (m, 1H), 7.17-7.05 (m, 2H), 6.94 (d, *J* = 8.6 Hz, 1H), 6.86 (dd, *J* = 11.3, 3.9 Hz, 1H), 6.64 (d, *J* = 8.1 Hz, 1H), 6.39 (s, 1H), 2.34 (s, 3H). **<sup>13</sup>C NMR** (126 MHz, CDCl<sub>3</sub>) δ: 142.1, 141.1, 136.3, 135.7, 133.3, 132.7, 130.0, 129.2, 128.7, 128.3, 125.7, 125.3 (q, *J* = 286.2 Hz), 125.3, 123.6 (d, *J* = 2.6 Hz), 122.9, 122.7, 120.8, 119.3, 112.8, 111.8 (d, *J* = 2.3 Hz), 111.5, 107.6, 104.8, 70.5 (q, *J* = 31.3 Hz), 9.6. **<sup>19</sup>F NMR** (376 MHz, CDCl<sub>3</sub>) δ: -72.46. IR (ATR) *v*<sub>max</sub>: 3411, 2950, 1453, 1164, 892, 740 cm<sup>-1</sup>. **HRMS** (ESI): *m/z* calcd. for C<sub>27</sub>H<sub>18</sub>N<sub>2</sub>F<sub>3</sub>Br [M+H]<sup>+</sup>: 507.0678; found: 507.0677. **HPLC analysis:** The enantiomeric excess was determined by HPLC with Chiralpak AD-H column (hexane/*i*-PrOH = 95/5, flow rate 0.8 mL · min<sup>-1</sup>, λ = 254 nm): *t*<sub>major</sub> = 18.5 min, *t*<sub>minor</sub> = 25.3 min.

(*R*)-3-(1*H*-indol-3-yl)-7,9-dimethyl-1-phenyl-3-(trifluoromethyl)-3*H*-pyrrolo[1,2-*a*]indole (**7f**)

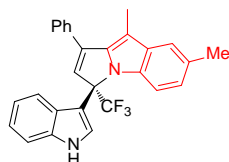

colorless oil, 13 h, 96% yield, 96:4 *er*,  $[α]_D^{20} = +321.05$  (c = 0.19, MeOH). **<sup>1</sup>H NMR** (400 MHz, CDCl<sub>3</sub>) δ: 8.20 (s, 1H), 7.66 (dd, *J* = 7.6, 1.6 Hz, 2H), 7.50-7.43 (m, 4H), 7.39 (s, 1H), 7.32 (d, *J* = 8.2 Hz, 1H), 7.11 (t, *J* = 7.4 Hz, 1H), 7.03 (d, *J* = 8.3 Hz, 1H), 6.88 (t, *J* = 7.6 Hz, 2H), 6.82 (d, *J* = 8.1 Hz, 1H), 6.38 (s, 1H), 2.41 (s, 3H), 2.37 (s, 3H). **<sup>13</sup>C NMR** (126 MHz, CDCl<sub>3</sub>) δ: 141.2, 141.0, 136.3, 134.2, 133.1, 129.1, 129.0, 128.6, 128.3, 125.5 (q, *J* = 286.2 Hz), 125.5, 124.5, 123.6 (d, *J* = 2.6 Hz), 122.7, 120.7, 119.8, 119.6, 111.4, 110.3 (d, *J* = 1.7 Hz), 108.2, 104.7, 70.3 (q, *J* = 31.4 Hz), 21.6, 9.7. **<sup>19</sup>F NMR** (376 MHz, CDCl<sub>3</sub>) δ: -72.34. IR (ATR) *v*<sub>max</sub>: 3408, 2922, 1175, 896, 741, 699 cm<sup>-1</sup>. **HRMS** (ESI): *m/z* calcd. for C<sub>28</sub>H<sub>21</sub>N<sub>2</sub>F<sub>3</sub> [M+H]<sup>+</sup>: 443.1730; found: 443.1731. **HPLC analysis:** The enantiomeric excess was determined by HPLC with Chiralpak IA column (hexane/*i*-PrOH = 90/10, flow rate 0.8 mL · min<sup>-1</sup>, λ = 254 nm): *t*<sub>major</sub> = 8.7 min, *t*<sub>minor</sub> = 11.9 min.

(*R*)-3-(1*H*-indol-3-yl)-7-methoxy-9-methyl-1-phenyl-3-(trifluoromethyl)-3*H*-pyrrolo[1,2-*a*]indole (**7g**)

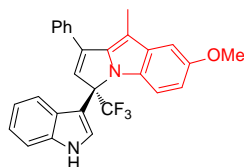

colorless oil, 3.5 d, 60% yield, 96:4 *er*,  $[α]_D^{20} = +367.50$  (c = 0.12, MeOH). **<sup>1</sup>H NMR** (500 MHz, CDCl<sub>3</sub>) δ: 8.28 (s, 1H), 7.65 (dd, *J* = 7.8, 1.5 Hz, 2H), 7.49-7.42 (m, 4H), 7.33 (d, *J* = 8.2 Hz, 1H), 7.11 (t, *J* = 7.6 Hz, 1H), 7.03 (dd, *J* = 11.5, 5.6 Hz, 2H), 6.87 (t, *J* = 7.6 Hz, 1H), 6.78 (d, *J* = 8.2 Hz, 1H), 6.70 (dd, *J* = 8.9, 2.4 Hz, 1H), 6.37 (s, 1H), 3.83 (s, 3H), 2.36 (s, 3H). **<sup>13</sup>C NMR** (126 MHz, CDCl<sub>3</sub>) δ: 154.0, 141.7, 141.3, 136.3, 134.5, 133.1, 130.1, 129.2, 129.0, 128.7, 128.3, 125.5 (q, *J* = 286.0 Hz), 125.4, 123.6 (d, *J* = 2.4 Hz), 122.8, 120.7, 119.6, 112.7, 111.4, 111.3, 108.2, 104.8, 102.3, 70.3 (q, *J* = 31.4 Hz), 56.0, 9.7. **<sup>19</sup>F NMR** (471 MHz, CDCl<sub>3</sub>) δ: -72.46. IR



(ATR)  $\nu_{\max}$ : 3409, 2934, 1167, 897, 745, 700  $\text{cm}^{-1}$ . **HRMS** (ESI):  $m/z$  calcd. for  $\text{C}_{28}\text{H}_{21}\text{N}_2\text{OF}_3$   $[\text{M}+\text{H}]^+$ : 459.1679; found: 459.1685. **HPLC analysis**: The enantiomeric excess was determined by HPLC with Chiralpak IA column (hexane/*i*-PrOH = 90/10, flow rate 1  $\text{mL}\cdot\text{min}^{-1}$ ,  $\lambda$  = 254 nm):  $t_{\text{major}}$  = 10.0 min,  $t_{\text{minor}}$  = 16.2 min.

(*R*)-6-chloro-3-(1*H*-indol-3-yl)-9-methyl-1-phenyl-3-(trifluoromethyl)-3*H*-pyrrolo[1,2-*a*]indole (**7h**)

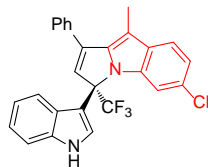

light brown foam, 15 h, 77% yield, 95.5:4.5 *er*,  $[\alpha]_D^{20}$  = +455.33 ( $c$  = 0.15, MeOH). **<sup>1</sup>H NMR** (400 MHz,  $\text{CDCl}_3$ )  $\delta$ : 8.32 (s, 1H), 7.65 (dd,  $J$  = 7.5, 1.9 Hz, 2H), 7.53-7.44 (m, 5H), 7.36 (d,  $J$  = 8.2 Hz, 1H), 7.13 (t,  $J$  = 7.3 Hz, 1H), 7.08 (s, 1H), 7.01 (dd,  $J$  = 8.5, 1.8 Hz, 1H), 6.87 (t,  $J$  = 7.3 Hz, 1H), 6.73 (d,  $J$  = 8.1 Hz, 1H), 6.37 (s, 1H), 2.36 (s, 3H). **<sup>13</sup>C NMR** (126 MHz,  $\text{CDCl}_3$ )  $\delta$ : 141.5, 141.1, 136.4, 134.9, 132.7, 132.6, 129.6, 129.2, 128.9, 128.7, 128.3, 125.3, 125.3 (q,  $J$  = 286.1 Hz), 123.7 (d,  $J$  = 2.9 Hz), 122.9, 120.9, 120.7, 120.2, 119.3, 111.6, 110.5 (d,  $J$  = 2.4 Hz), 107.4, 105.3, 70.4 (q,  $J$  = 31.4 Hz), 9.6. **<sup>19</sup>F NMR** (376 MHz,  $\text{CDCl}_3$ )  $\delta$ : -72.29. IR (ATR)  $\nu_{\max}$ : 3411, 2937, 1188, 897, 742  $\text{cm}^{-1}$ . **HRMS** (ESI):  $m/z$  calcd. for  $\text{C}_{27}\text{H}_{18}\text{N}_2\text{F}_3\text{Cl}$   $[\text{M}+\text{H}]^+$ : 463.1183; found: 463.1184. **HPLC analysis**: The enantiomeric excess was determined by HPLC with Chiralpak IA column (hexane/*i*-PrOH = 90/10, flow rate 0.8  $\text{mL}\cdot\text{min}^{-1}$ ,  $\lambda$  = 254 nm):  $t_{\text{major}}$  = 8.0 min,  $t_{\text{minor}}$  = 8.4 min.

(*R*)-3-(1*H*-indol-3-yl)-1,9-diphenyl-3-(trifluoromethyl)-3*H*-pyrrolo[1,2-*a*]indole (**7i**)

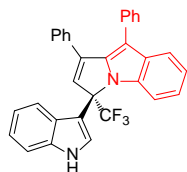

colorless oil, 13 h, 70% yield, 95:5 *er*,  $[\alpha]_D^{20}$  = +194.67 ( $c$  = 0.15, MeOH). **<sup>1</sup>H NMR** (500 MHz,  $\text{CDCl}_3$ )  $\delta$ : 8.30 (s, 1H), 7.74-7.70 (m, 1H), 7.55 (s, 1H), 7.34 (d,  $J$  = 8.2 Hz, 1H), 7.32 (dd,  $J$  = 6.5, 3.1 Hz, 2H), 7.27-7.20 (m, 7H), 7.14 (d,  $J$  = 2.7 Hz, 1H), 7.12 (dd,  $J$  = 8.2, 1.9 Hz, 2H), 7.09-7.06 (m, 2H), 6.91-6.83 (m, 2H), 6.54 (s, 1H). **<sup>13</sup>C NMR** (126 MHz,  $\text{CDCl}_3$ )  $\delta$ : 140.9, 140.4, 136.4, 134.6, 133.6, 132.3, 132.0, 130.9, 130.6, 128.7, 128.3, 128.1, 128.0, 126.6, 125.5 (q,  $J$  = 286.4 Hz), 125.3, 123.9 (d,  $J$  = 2.5 Hz), 123.3, 122.9, 121.0, 120.8, 120.3, 119.5, 112.3, 111.5, 110.8 (d,  $J$  = 2.2 Hz), 107.5, 70.6 (q,  $J$  = 31.6 Hz). **<sup>19</sup>F NMR** (471 MHz,  $\text{CDCl}_3$ )  $\delta$ : -71.79. IR (ATR)  $\nu_{\max}$ : 3413, 2967, 1444, 1263, 1177, 894, 738  $\text{cm}^{-1}$ . **HRMS** (ESI):  $m/z$  calcd. for  $\text{C}_{32}\text{H}_{21}\text{N}_2\text{F}_3$   $[\text{M}+\text{H}]^+$ : 491.1730; found: 491.1726. **HPLC analysis**: The enantiomeric excess was determined by HPLC with Chiralpak IA column (hexane/*i*-PrOH = 90/10, flow rate 1  $\text{mL}\cdot\text{min}^{-1}$ ,  $\lambda$  = 254 nm):  $t_{\text{major}}$  = 6.8 min,  $t_{\text{minor}}$  = 6.1 min.

(*R*)-9-ethyl-3-(1*H*-indol-3-yl)-1-phenyl-3-(trifluoromethyl)-3*H*-pyrrolo[1,2-*a*]indole (**7j**)

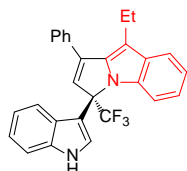

colorless oil, 36 h, 48% yield, 97:3 *er*,  $[\alpha]_D^{20}$  = +251.25 ( $c$  = 0.16, MeOH). **<sup>1</sup>H NMR** (400 MHz,  $\text{CDCl}_3$ )  $\delta$ : 8.24 (s, 1H), 7.65-7.61 (m, 3H), 7.51-7.43 (m, 4H), 7.33 (d,  $J$  = 8.1 Hz, 1H), 7.14-7.07 (m, 2H), 7.06-6.99 (m, 2H), 6.85 (ddd,  $J$  = 8.1, 7.1, 0.9 Hz, 1H), 6.72 (d,  $J$  = 8.0 Hz, 1H), 6.36 (s, 1H), 2.82 (q,  $J$  = 7.5 Hz, 2H), 1.23 (t,  $J$  = 7.5 Hz,

3H). **<sup>13</sup>C NMR** (126 MHz, CDCl<sub>3</sub>) δ: 141.3, 140.5, 136.3, 135.1, 133.3, 133.0, 132.0, 129.6, 129.0, 128.7, 128.1, 125.5 (q, *J* = 286.1 Hz), 125.4, 123.6 (d, *J* = 2.6 Hz), 122.8 (d, *J* = 5.3 Hz), 120.6, 120.3, 119.5, 119.4, 112.6, 111.4, 110.7 (d, *J* = 2.4 Hz), 108.2, 70.3 (q, *J* = 31.4 Hz), 17.5, 16.1. **<sup>19</sup>F NMR** (376 MHz, CDCl<sub>3</sub>) δ: -72.24. IR (ATR)  $\nu_{max}$ : 3410, 2926, 1455, 1171, 895, 704 cm<sup>-1</sup>. **HRMS** (ESI): *m/z* calcd. for C<sub>28</sub>H<sub>21</sub>N<sub>2</sub>F<sub>3</sub> [M+H]<sup>+</sup>: 443.1730; found: 443.1725. **HPLC analysis**: The enantiomeric excess was determined by HPLC with Chiralpak IA column (hexane/*i*-PrOH = 90/10, flow rate 1 mL·min<sup>-1</sup>, λ = 254 nm): *t*<sub>major</sub> = 6.5 min, *t*<sub>minor</sub> = 7.4 min.

(*R*)-3-(4-fluoro-1*H*-indol-3-yl)-9-methyl-1-phenyl-3-(trifluoromethyl)-3*H*-pyrrolo[1,2-*a*]indole (**7k**)

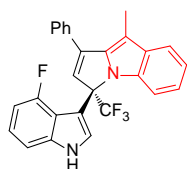

light brown foam, 3 d, 68% yield, 92.5:7.5 *er*, [*a*]<sub>D</sub><sup>20</sup> = +355.29 (c = 0.17, MeOH). **<sup>1</sup>H NMR** (500 MHz, CDCl<sub>3</sub>) δ: 8.32 (s, 1H), 7.64 (dd, *J* = 12.2, 7.5 Hz, 3H), 7.53-7.39 (m, 4H), 7.30 (d, *J* = 7.7 Hz, 1H), 7.19-7.05 (m, 4H), 6.71 (s, 1H), 6.67 (s, 1H), 2.32 (s, 3H). **<sup>13</sup>C NMR** (126 MHz, CDCl<sub>3</sub>) δ: 155.9 (d, *J* = 249.6 Hz), 141.6 (d, *J* = 17.5 Hz), 139.5 (d, *J* = 10.8 Hz), 134.8, 134.4, 133.3, 129.8 (d, *J* = 8.4 Hz), 128.9, 128.6, 128.4, 125.3 (q, *J* = 286.9 Hz), 125.0, 123.6 (d, *J* = 8.2 Hz), 122.7, 120.1, 119.4, 114.5 (d, *J* = 20.3 Hz), 111.0 (d, *J* = 2.8 Hz), 107.6 (d, *J* = 3.7 Hz), 107.5 (d, *J* = 3.1 Hz), 106.6, 106.4, 104.5, 70.8 (q, *J* = 31.6 Hz), 9.4. **<sup>19</sup>F NMR** δ: -72.07 (d, *J* = 14.4 Hz), -113.86~-114.10 (m). IR (ATR)  $\nu_{max}$ : 3412, 2952, 1448, 1247, 1153, 894, 740 cm<sup>-1</sup>. **HRMS** (ESI): *m/z* calcd. for C<sub>27</sub>H<sub>18</sub>N<sub>2</sub>F<sub>4</sub> [M+H]<sup>+</sup>: 447.1479; found: 447.1480. **HPLC analysis**: The enantiomeric excess was determined by HPLC with Chiralpak IA column (hexane/*i*-PrOH = 90/10, flow rate 1 mL·min<sup>-1</sup>, λ = 280 nm): *t*<sub>major</sub> = 7.3 min, *t*<sub>minor</sub> = 10.4 min.

(*R*)-3-(5-fluoro-1*H*-indol-3-yl)-9-methyl-1-phenyl-3-(trifluoromethyl)-3*H*-pyrrolo[1,2-*a*]indole (**7l**)

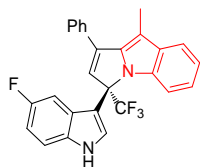

colorless oil, 13 h, 86% yield, >99:1 *er*, [*a*]<sub>D</sub><sup>20</sup> = +376.25 (c = 0.16, MeOH). **<sup>1</sup>H NMR** (400 MHz, CDCl<sub>3</sub>) δ: 8.26 (s, 1H), 7.75-7.65 (m, 2H), 7.62 (d, *J* = 6.9 Hz, 1H), 7.56-7.40 (m, 4H), 7.21 (dt, *J* = 22.1, 11.1 Hz, 1H), 7.14-7.00 (m, 3H), 6.85 (td, *J* = 9.0, 2.3 Hz, 1H), 6.39 (dd, *J* = 10.1, 2.2 Hz, 1H), 6.35 (s, 1H), 2.39 (s, 3H). **<sup>13</sup>C NMR** (126 MHz, CDCl<sub>3</sub>) δ: 158.0 (d, *J* = 235.5 Hz), 141.4, 140.8, 134.7, 134.0, 132.9, 132.8, 129.2, 128.8, 128.7, 128.3, 125.8 (d, *J* = 10.6 Hz), 125.4 (q, *J* = 286.1 Hz), 125.2 (d, *J* = 2.6 Hz), 123.0, 120.2, 119.6, 112.1 (d, *J* = 9.8 Hz), 111.4 (d, *J* = 26.7 Hz), 110.4 (d, *J* = 2.1 Hz), 108.4 (d, *J* = 4.6 Hz), 105.6, 104.7 (d, *J* = 24.9 Hz), 70.1 (q, *J* = 31.6 Hz), 9.6. **<sup>19</sup>F NMR** (376 MHz, CDCl<sub>3</sub>) δ: -72.30, -122.52 (td, *J* = 9.6, 4.5 Hz). IR (ATR)  $\nu_{max}$ : 3410, 2963, 1507, 1288, 1154, 896, 741 cm<sup>-1</sup>. **HRMS** (ESI): *m/z* calcd. for C<sub>27</sub>H<sub>18</sub>N<sub>2</sub>F<sub>4</sub> [M+H]<sup>+</sup>: 447.1479; found: 447.1489. **HPLC analysis**: The enantiomeric excess was determined by HPLC with Chiralpak AD-H column (hexane/*i*-PrOH = 95/5, flow rate 0.8 mL·min<sup>-1</sup>, λ = 254 nm): *t*<sub>major</sub> = 25.1 min, *t*<sub>minor</sub> = 44.9 min.

(*R*)-3-(5-chloro-1*H*-indol-3-yl)-9-methyl-1-phenyl-3-(trifluoromethyl)-3*H*-pyrrolo[1,2-*a*]indole (**7m**)

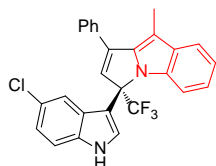

colorless oil, 13 h, 82% yield, 96:4 *er*,  $[\alpha]_D^{20} = +562.22$  ( $c = 0.18$ , MeOH). **<sup>1</sup>H NMR** (400 MHz, CDCl<sub>3</sub>)  $\delta$ : 8.27 (s, 1H), 7.70-7.64 (m, 2H), 7.64-7.58 (m, 1H), 7.54-7.40 (m, 4H), 7.25-7.19 (m, 1H), 7.12 (s, 1H), 7.10-7.02 (m, 3H), 6.81 (d,  $J = 1.9$  Hz, 1H), 6.37 (s, 1H), 2.38 (s, 3H). **<sup>13</sup>C NMR** (126 MHz, CDCl<sub>3</sub>)  $\delta$ : 141.4, 140.8, 134.7, 134.1, 132.9, 129.2, 128.8, 128.7, 128.3, 126.4, 126.4, 125.3 (q,  $J = 286.1$  Hz), 125.0 (d,  $J = 2.4$  Hz), 123.3, 123.1, 120.3, 119.6, 119.3, 112.4, 110.5 (d,  $J = 2.3$  Hz), 108.2, 105.7, 70.1 (q,  $J = 31.5$  Hz), 9.5. **<sup>19</sup>F NMR** (376 MHz, CDCl<sub>3</sub>)  $\delta$ : -72.22. IR (ATR)  $\nu_{max}$ : 3413, 2967, 1444, 1263, 1177, 894, 738 cm<sup>-1</sup>. **HRMS** (ESI):  $m/z$  calcd. for C<sub>27</sub>H<sub>18</sub>N<sub>2</sub>F<sub>3</sub>Cl [M+H]<sup>+</sup>: 463.1183; found: 463.1184. **HPLC analysis**: The enantiomeric excess was determined by HPLC with Chiralpak AD-H column (hexane/*i*-PrOH = 95/5, flow rate 0.8 mL·min<sup>-1</sup>,  $\lambda = 254$  nm):  $t_{major} = 15.8$  min,  $t_{minor} = 14.9$  min.

(*R*)-3-(5-bromo-1*H*-indol-3-yl)-9-methyl-1-phenyl-3-(trifluoromethyl)-3*H*-pyrrolo[1,2-*a*]indole (**7n**)

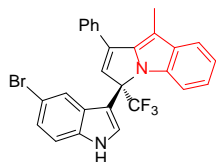

light brown foam, 13 h, 85% yield, 95.5:4.5 *er*,  $[\alpha]_D^{20} = +382.50$  ( $c = 0.20$ , MeOH). **<sup>1</sup>H NMR** (400 MHz, CDCl<sub>3</sub>)  $\delta$ : 8.26 (s, 1H), 7.72-7.58 (m, 3H), 7.54-7.38 (m, 4H), 7.22-7.04 (m, 5H), 6.98 (s, 1H), 6.37 (s, 1H), 2.38 (s, 3H). **<sup>13</sup>C NMR** (126 MHz, CDCl<sub>3</sub>)  $\delta$ : 141.4, 140.8, 135.0, 134.7, 134.1, 132.8, 129.2, 128.8, 128.7, 128.3, 127.0, 125.8, 125.3 (q,  $J = 286.0$  Hz), 124.9 (d,  $J = 2.3$  Hz), 123.1, 122.5, 120.3, 119.6, 114.0, 112.8, 110.5 (d,  $J = 1.9$  Hz), 108.2, 105.7, 70.1 (q,  $J = 31.8$  Hz), 9.5. **<sup>19</sup>F NMR** (376 MHz, CDCl<sub>3</sub>)  $\delta$ : -72.20. IR (ATR)  $\nu_{max}$ : 3415, 2988, 1473, 1256, 1121, 739 cm<sup>-1</sup>. **HRMS** (ESI):  $m/z$  calcd. for C<sub>27</sub>H<sub>18</sub>N<sub>2</sub>F<sub>3</sub>Br [M+H]<sup>+</sup>: 507.0678; found: 507.0676. **HPLC analysis**: The enantiomeric excess was determined by HPLC with Chiralpak AD-H column (hexane/*i*-PrOH = 95/5, flow rate 0.8 mL·min<sup>-1</sup>,  $\lambda = 254$  nm):  $t_{major} = 15.5$  min,  $t_{minor} = 14.6$  min.

(*R*)-9-methyl-3-(5-methyl-1*H*-indol-3-yl)-1-phenyl-3-(trifluoromethyl)-3*H*-pyrrolo[1,2-*a*]indole (**7o**)

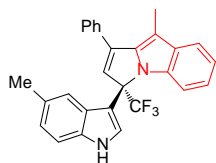

light brown foam, 13 h, 81% yield, 97:3 *er*,  $[\alpha]_D^{20} = +420.00$  ( $c = 0.15$ , MeOH). **<sup>1</sup>H NMR** (400 MHz, CDCl<sub>3</sub>)  $\delta$ : 8.12 (s, 1H), 7.73-7.64 (m, 2H), 7.61 (dd,  $J = 6.2, 2.8$  Hz, 1H), 7.53-7.43 (m, 3H), 7.40 (s, 1H), 7.19 (dd,  $J = 10.5, 5.7$  Hz, 2H), 7.11-7.04 (m, 2H), 6.95 (d,  $J = 8.2$  Hz, 1H), 6.69 (s, 1H), 6.43 (s, 1H), 2.38 (s, 3H), 2.22 (s, 3H). **<sup>13</sup>C NMR** (126 MHz, CDCl<sub>3</sub>)  $\delta$ : 141.0, 141.0, 134.8, 134.7, 134.1, 133.2, 129.7, 129.4, 129.0, 128.7, 128.3, 125.7, 125.5 (q,  $J = 285.8$  Hz), 124.4, 123.9 (d,  $J = 2.1$  Hz), 122.9, 120.0, 119.5, 119.4, 111.0, 110.7 (d,  $J = 2.3$  Hz), 107.6, 105.1, 70.4 (q,  $J = 31.4$  Hz), 21.8, 9.5. **<sup>19</sup>F NMR** (376 MHz, CDCl<sub>3</sub>)  $\delta$ : -72.15. IR (ATR)  $\nu_{max}$ : 3413, 2966, 1457, 1260, 1162, 890, 741 cm<sup>-1</sup>. **HRMS** (ESI):  $m/z$  calcd. for C<sub>28</sub>H<sub>21</sub>N<sub>2</sub>F<sub>3</sub> [M+H]<sup>+</sup>: 443.1730; found: 443.1742. **HPLC analysis**: The enantiomeric excess was determined by HPLC with Chiralpak IA column (hexane/*i*-PrOH = 90/10, flow rate 1 mL·min<sup>-1</sup>,  $\lambda = 254$  nm):  $t_{major} = 7.4$  min,  $t_{minor} = 6.4$  min.

(*R*)-3-(5-methoxy-1*H*-indol-3-yl)-9-methyl-1-phenyl-3-(trifluoromethyl)-3*H*-pyrrolo[1,2-*a*]indole (**7p**)

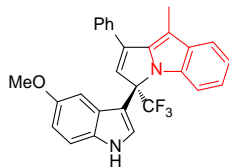

light brown foam, 13 h, 97% yield, 96:4 *er*,  $[a]_D^{20} = +427.14$  ( $c = 0.14$ , MeOH). **<sup>1</sup>H NMR** (400 MHz, CDCl<sub>3</sub>)  $\delta$ : 8.18 (s, 1H), 7.72-7.62 (m, 2H), 7.58 (d,  $J = 7.2$  Hz, 1H), 7.46 (tdd,  $J = 8.3, 5.9, 2.6$  Hz, 4H), 7.17 (d,  $J = 8.8$  Hz, 1H), 7.10-6.96 (m, 3H), 6.70 (dd,  $J = 8.8, 2.4$  Hz, 1H), 6.33 (s, 1H), 5.80 (d,  $J = 2.3$  Hz, 1H), 3.36 (s, 3H), 2.37 (s, 3H). **<sup>13</sup>C NMR** (126 MHz, CDCl<sub>3</sub>)  $\delta$ : 154.3, 141.3, 141.0, 135.1, 133.9, 133.0, 131.1, 129.5, 129.1, 128.7, 128.3, 125.7, 125.5 (q,  $J = 285.8$  Hz), 123.8 (d,  $J = 2.8$  Hz), 123.1, 119.9, 119.6, 113.5, 112.0, 110.6 (d,  $J = 1.9$  Hz), 107.6, 105.3, 100.3, 70.3 (q,  $J = 31.3$  Hz), 55.2, 9.5. **<sup>19</sup>F NMR** (376 MHz, CDCl<sub>3</sub>)  $\delta$ : -72.42. IR (ATR)  $\nu_{max}$ : 3412, 2977, 1469, 1239, 1185, 899, 737 cm<sup>-1</sup>. **HRMS** (ESI):  $m/z$  calcd. for C<sub>28</sub>H<sub>21</sub>N<sub>2</sub>OF<sub>3</sub> [M+H]<sup>+</sup>: 459.1679; found: 459.1669. **HPLC analysis**: The enantiomeric excess was determined by HPLC with Chiralpak IA column (hexane/*i*-PrOH = 90/10, flow rate 1 mL·min<sup>-1</sup>,  $\lambda = 254$  nm):  $t_{major} = 9.4$  min,  $t_{minor} = 8.0$  min.

(*R*)-3-(6-chloro-1*H*-indol-3-yl)-9-methyl-1-phenyl-3-(trifluoromethyl)-3*H*-pyrrolo[1,2-*a*]indole (**7q**)

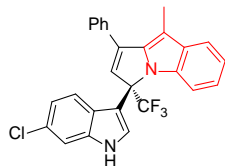

light brown foam, 13 h, 93% yield, 97.5:2.5 *er*,  $[a]_D^{20} = +386.50$  ( $c = 0.20$ , MeOH). **<sup>1</sup>H NMR** (400 MHz, CDCl<sub>3</sub>)  $\delta$ : 8.24 (s, 1H), 7.68-7.63 (m, 2H), 7.61 (dd,  $J = 8.3, 1.5$  Hz, 1H), 7.52-7.42 (m, 4H), 7.29 (d,  $J = 1.6$  Hz, 1H), 7.13-7.00 (m, 3H), 6.80 (dd,  $J = 8.7, 1.9$  Hz, 1H), 6.53 (d,  $J = 8.7$  Hz, 1H), 6.33 (s, 1H), 2.39 (s, 3H). **<sup>13</sup>C NMR** (126 MHz, CDCl<sub>3</sub>)  $\delta$ : 141.4, 140.8, 136.7, 134.7, 134.0, 132.8, 129.2, 129.0, 128.8, 128.7, 128.3, 125.3 (q,  $J = 291.3$  Hz), 124.2 (d,  $J = 2.7$  Hz), 124.0, 123.1, 121.5, 120.3, 120.2, 119.6, 111.3, 110.4 (d,  $J = 2.1$  Hz), 108.4, 105.5, 70.1 (q,  $J = 31.5$  Hz), 9.7. **<sup>19</sup>F NMR** (376 MHz, CDCl<sub>3</sub>)  $\delta$ : -72.38. IR (ATR)  $\nu_{max}$ : 3409, 2965, 1456, 1252, 1149, 898, 738 cm<sup>-1</sup>. **HRMS** (ESI):  $m/z$  calcd. for C<sub>27</sub>H<sub>18</sub>N<sub>2</sub>F<sub>3</sub>Cl [M+H]<sup>+</sup>: 463.1183; found: 463.1182. **HPLC analysis**: The enantiomeric excess was determined by HPLC with Chiralpak AD-H column (hexane/*i*-PrOH = 95/5, flow rate 0.8 mL·min<sup>-1</sup>,  $\lambda = 254$  nm):  $t_{major} = 39.8$  min,  $t_{minor} = 23.5$  min.

(*R*)-3-(7-chloro-1*H*-indol-3-yl)-9-methyl-1-phenyl-3-(trifluoromethyl)-3*H*-pyrrolo[1,2-*a*]indole (**7r**)

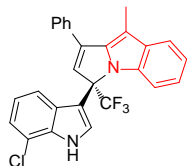

light brown foam, 4 d, 70% yield, 95:5 *er*,  $[a]_D^{20} = +343.46$  ( $c = 0.26$ , MeOH). **<sup>1</sup>H NMR** (500 MHz, CDCl<sub>3</sub>)  $\delta$ : 8.48 (s, 1H), 7.69-7.65 (m, 2H), 7.63-7.60 (m, 1H), 7.54 (s, 1H), 7.51-7.44 (m, 3H), 7.13-7.03 (m, 4H), 6.79 (td,  $J = 8.0, 3.7$  Hz, 1H), 6.59 (d,  $J = 8.2$  Hz, 1H), 6.36 (s, 1H), 2.40 (s, 3H). **<sup>13</sup>C NMR** (126 MHz, CDCl<sub>3</sub>)  $\delta$ : 141.4, 140.8, 134.7, 134.0, 133.7, 132.9, 129.2, 129.0, 128.7, 128.3, 126.8, 125.3 (q,  $J = 289.0$  Hz), 124.2 (d,  $J = 2.7$  Hz), 123.1, 122.2, 121.5, 120.1, 119.6, 118.2, 116.9, 110.5 (d,  $J = 1.8$  Hz), 109.4, 105.5, 70.1 (q,  $J = 31.5$  Hz), 9.7. **<sup>19</sup>F NMR** (471 MHz, CDCl<sub>3</sub>)  $\delta$ : -72.32. IR (ATR)  $\nu_{max}$ : 3417, 2955, 1434, 1229, 1147, 889, 742 cm<sup>-1</sup>. **HRMS** (ESI):  $m/z$  calcd. for C<sub>27</sub>H<sub>18</sub>N<sub>2</sub>F<sub>3</sub>Cl [M+H]<sup>+</sup>: 463.1183; found: 463.1182. **HPLC analysis**: The enantiomeric excess was determined by HPLC with Chiralpak IA column (hexane/*i*-PrOH = 90/10, flow rate 1 mL·min<sup>-1</sup>,  $\lambda = 254$  nm):

$t_{\text{major}} = 8.4$  min,  $t_{\text{minor}} = 7.1$  min.

(*R*)-1-(3-chlorophenyl)-3-(1*H*-indol-3-yl)-9-methyl-3-(trifluoromethyl)-3*H*-pyrrolo[1,2-*a*]indole (**7s**)

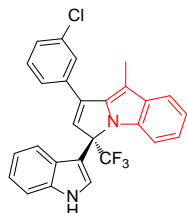

colorless oil, 20 h, 79% yield, 97:3 *er*,  $[a]_D^{20} = +358.76$  ( $c = 0.16$ , MeOH). **<sup>1</sup>H NMR** (400 MHz, CDCl<sub>3</sub>)  $\delta$ : 8.26 (s, 1H), 7.65 (d,  $J = 1.9$  Hz, 1H), 7.61 (dt,  $J = 5.4, 3.2$  Hz, 1H), 7.58-7.51 (m, 1H), 7.47 (d,  $J = 1.0$  Hz, 1H), 7.44-7.37 (m, 2H), 7.33 (d,  $J = 8.2$  Hz, 1H), 7.16-7.09 (m, 2H), 7.09-7.01 (m, 2H), 6.92-6.84 (m, 1H), 6.73 (d,  $J = 8.1$  Hz, 1H), 6.41 (s, 1H), 2.39 (s, 3H). **<sup>13</sup>C NMR** (126 MHz, CDCl<sub>3</sub>)  $\delta$ : 140.3, 139.9, 136.3, 134.8, 134.8, 134.7, 133.9, 130.0, 130.0, 129.1, 128.4, 126.5, 125.4 (q,  $J = 288.7$  Hz), 125.3, 123.7 (d,  $J = 2.5$  Hz), 123.2, 122.8, 120.8, 120.1, 119.6, 119.4, 111.5, 110.6 (d,  $J = 1.8$  Hz), 107.8, 105.4, 70.4 (q,  $J = 31.4$  Hz), 9.6. **<sup>19</sup>F NMR** (376 MHz, CDCl<sub>3</sub>)  $\delta$ : -72.23. IR (ATR)  $\nu_{\text{max}}$ : 3410, 2966, 1451, 1243, 1119, 895, 739 cm<sup>-1</sup>. **HRMS** (ESI):  $m/z$  calcd. for C<sub>27</sub>H<sub>18</sub>N<sub>2</sub>F<sub>3</sub>Cl [M+H]<sup>+</sup>: 463.1183; found: 463.1180. **HPLC analysis**: The enantiomeric excess was determined by HPLC with Chiralpak AD-H column (hexane/*i*-PrOH = 95/5, flow rate 0.8 mL·min<sup>-1</sup>,  $\lambda = 254$  nm):  $t_{\text{major}} = 19.0$  min,  $t_{\text{minor}} = 25.1$  min.

(*R*)-1-(4-fluorophenyl)-3-(1*H*-indol-3-yl)-9-methyl-3-(trifluoromethyl)-3*H*-pyrrolo[1,2-*a*]indole (**7t**)

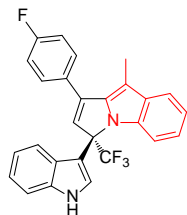

light brown foam, 10 h, 78% yield, 97:3 *er*,  $[a]_D^{20} = +335.26$  ( $c = 0.19$ , MeOH). **<sup>1</sup>H NMR** (400 MHz, CDCl<sub>3</sub>)  $\delta$ : 8.23 (s, 1H), 7.63 (ddd,  $J = 9.0, 5.9, 2.8$  Hz, 3H), 7.46 (s, 1H), 7.33 (d,  $J = 8.2$  Hz, 1H), 7.13 (dt,  $J = 11.0, 5.7$  Hz, 4H), 7.06 (ddd,  $J = 9.7, 5.6, 3.6$  Hz, 2H), 6.88 (t,  $J = 7.6$  Hz, 1H), 6.75 (d,  $J = 8.1$  Hz, 1H), 6.36 (s, 1H), 2.38 (s, 3H). **<sup>13</sup>C NMR** (126 MHz, CDCl<sub>3</sub>)  $\delta$ : 163.3 (d,  $J = 248.5$  Hz), 140.7, 140.1, 136.3, 134.8, 133.9, 130.2, 130.1, 129.3, 129.1 (d,  $J = 3.2$  Hz), 125.4 (q,  $J = 286.3$  Hz), 125.4, 123.7 (d,  $J = 2.5$  Hz), 123.1, 122.8, 120.7, 120.1, 119.5, 119.5, 115.8, 115.6, 111.5, 110.6 (d,  $J = 1.8$  Hz), 107.9, 105.2, 70.4 (q,  $J = 31.5$  Hz), 9.6. **<sup>19</sup>F NMR** (376 MHz, CDCl<sub>3</sub>)  $\delta$ : -72.26, -112.30 (dq,  $J = 8.6, 5.4$  Hz). IR (ATR)  $\nu_{\text{max}}$ : 3411, 2959, 1437, 1258, 1146, 890, 736 cm<sup>-1</sup>. **HRMS** (ESI):  $m/z$  calcd. for C<sub>27</sub>H<sub>18</sub>N<sub>2</sub>F<sub>4</sub> [M+H]<sup>+</sup>: 447.1479; found: 447.1486. **HPLC analysis**: The enantiomeric excess was determined by HPLC with Chiralpak AD-H column (hexane/*i*-PrOH = 95/5, flow rate 0.8 mL·min<sup>-1</sup>,  $\lambda = 254$  nm):  $t_{\text{major}} = 28.0$  min,  $t_{\text{minor}} = 40.0$  min.

(*R*)-1-(4-chlorophenyl)-3-(1*H*-indol-3-yl)-9-methyl-3-(trifluoromethyl)-3*H*-pyrrolo[1,2-*a*]indole (**7u**)

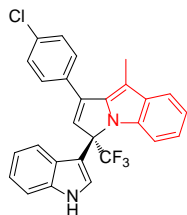

light brown foam, 10 h, 75% yield, 97:3 *er*,  $[\alpha]_D^{20} = +328.33$  ( $c = 0.18$ , MeOH). **<sup>1</sup>H NMR** (400 MHz, CDCl<sub>3</sub>)  $\delta$ : 8.25 (s, 1H), 7.68-7.55 (m, 3H), 7.51-7.41 (m, 3H), 7.33 (d,  $J = 8.2$  Hz, 1H), 7.16-7.09 (m, 2H), 7.08-6.99 (m, 2H), 6.86 (tt,  $J = 11.1, 5.6$  Hz, 1H), 6.73 (d,  $J = 8.1$  Hz, 1H), 6.38 (s, 1H), 2.38 (s, 3H). **<sup>13</sup>C NMR** (126 MHz, CDCl<sub>3</sub>)  $\delta$ : 140.5, 140.1, 136.3, 135.0, 134.8, 133.9, 131.5, 129.7, 129.6, 128.9, 125.4 (q,  $J = 286.3$  Hz), 125.4, 123.7 (d,  $J = 2.5$  Hz), 123.1, 122.8, 120.7, 120.1, 119.6, 119.4, 111.5, 110.6 (d,  $J = 2.2$  Hz), 107.9, 105.3, 70.4 (q,  $J = 31.5$  Hz), 9.6. **<sup>19</sup>F NMR** (376 MHz, CDCl<sub>3</sub>)  $\delta$ : -72.24. IR (ATR)  $\nu_{max}$ : 3407, 2955, 1449, 1262, 1180, 892, 740 cm<sup>-1</sup>. **HRMS** (ESI):  $m/z$  calcd. for C<sub>27</sub>H<sub>18</sub>N<sub>2</sub>F<sub>3</sub>Cl [M+H]<sup>+</sup>: 463.1183; found: 463.1178. **HPLC analysis**: The enantiomeric excess was determined by HPLC with Chiralpak IA column (hexane/*i*-PrOH = 95/5, flow rate 0.8 mL·min<sup>-1</sup>,  $\lambda = 254$  nm):  $t_{major} = 28.1$  min,  $t_{minor} = 30.2$  min.

(*R*)-3-(1*H*-indol-3-yl)-9-methyl-1-(*p*-tolyl)-3-(trifluoromethyl)-3*H*-pyrrolo[1,2-*a*]indole (**7v**)

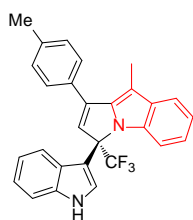

colorless oil, 10 h, 90% yield, 96:4 *er*,  $[\alpha]_D^{20} = +370.00$  ( $c = 0.18$ , MeOH). **<sup>1</sup>H NMR** (400 MHz, CDCl<sub>3</sub>)  $\delta$ : 8.24 (s, 1H), 7.64-7.58 (m, 1H), 7.56 (d,  $J = 8.1$  Hz, 2H), 7.47 (d,  $J = 0.9$  Hz, 1H), 7.30 (dd,  $J = 14.2, 8.0$  Hz, 3H), 7.18-7.07 (m, 2H), 7.07-6.99 (m, 2H), 6.91-6.83 (m, 1H), 6.78 (d,  $J = 8.1$  Hz, 1H), 6.36 (s, 1H), 2.43 (s, 3H), 2.40 (s, 3H). **<sup>13</sup>C NMR** (126 MHz, CDCl<sub>3</sub>)  $\delta$ : 141.1, 141.0, 139.0, 136.3, 134.8, 134.0, 130.1, 129.3, 128.8, 128.2, 125.5 (q,  $J = 286.1$  Hz), 125.4, 123.6 (d,  $J = 2.6$  Hz), 122.8, 122.7, 120.6, 120.0, 119.6, 119.4, 111.4, 110.6 (d,  $J = 2.0$  Hz), 108.2, 105.1, 70.3 (q,  $J = 31.5$  Hz), 21.5, 9.7. **<sup>19</sup>F NMR** (376 MHz, CDCl<sub>3</sub>)  $\delta$ : -72.28. IR (ATR)  $\nu_{max}$ : 3405, 2954, 1443, 1270, 1181, 889, 737 cm<sup>-1</sup>. **HRMS** (ESI):  $m/z$  calcd. for C<sub>28</sub>H<sub>21</sub>N<sub>2</sub>F<sub>3</sub> [M+H]<sup>+</sup>: 443.1730; found: 447.1734. **HPLC analysis**: The enantiomeric excess was determined by HPLC with Chiralpak IA column (hexane/*i*-PrOH = 90/10, flow rate 1 mL·min<sup>-1</sup>,  $\lambda = 254$  nm):  $t_{major} = 11.5$  min,  $t_{minor} = 13.0$  min.

(*R*)-3-(1*H*-indol-3-yl)-1-(4-methoxyphenyl)-9-methyl-3-(trifluoromethyl)-3*H*-pyrrolo[1,2-*a*]indole (**7w**)

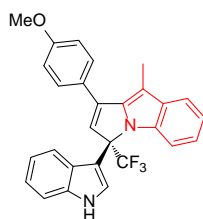

light brown foam, 10 h, 98% yield, 96.5:3.5 *er*,  $[\alpha]_D^{20} = +326.00$  ( $c = 0.20$ , MeOH). **<sup>1</sup>H NMR** (400 MHz, CDCl<sub>3</sub>)  $\delta$ : 8.20 (s, 1H), 7.67-7.56 (m, 3H), 7.45 (s, 1H), 7.31 (d,  $J = 8.2$  Hz, 1H), 7.20-7.03 (m, 4H), 7.02-6.98 (m, 2H), 6.92-6.83 (m, 1H), 6.79 (d,  $J = 8.1$  Hz, 1H), 6.33 (s, 1H), 3.88 (s, 3H), 2.42 (s, 3H). **<sup>13</sup>C NMR** (101 MHz, CDCl<sub>3</sub>)  $\delta$ : 160.3, 141.1, 140.7, 136.3, 134.8, 134.0, 129.6, 128.3, 125.5 (q,  $J = 285.9$  Hz), 125.4 (d,  $J = 3.0$  Hz), 123.6, 122.9, 122.7, 120.6, 120.0, 119.6, 119.4, 114.1, 111.4, 110.6, 108.3, 105.0, 100.1, 70.3 (q,  $J = 31.4$  Hz), 55.5, 9.7. **<sup>19</sup>F NMR** (376 MHz, CDCl<sub>3</sub>)  $\delta$ : -72.27. IR (ATR)  $\nu_{max}$ : 3405, 2962, 1447, 1259, 1174, 884, 737 cm<sup>-1</sup>. **HRMS** (ESI):  $m/z$  calcd. for C<sub>28</sub>H<sub>21</sub>N<sub>2</sub>O<sub>3</sub>F<sub>3</sub> [M+H]<sup>+</sup>: 459.1679; found: 459.1681. **HPLC analysis**: The enantiomeric excess was determined by HPLC with Chiralpak IA column (hexane/*i*-PrOH = 90/10, flow rate 1 mL·min<sup>-1</sup>,  $\lambda = 254$  nm):  $t_{major} = 18.0$  min,  $t_{minor} = 16.0$  min.

(*R*)-3-(difluoromethyl)-3-(1*H*-indol-3-yl)-9-methyl-1-phenyl-3*H*-pyrrolo[1,2-*a*]indole (**7x**)

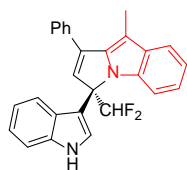

colorless oil, 14 h, 76% yield, 96:4 *er*,  $[\alpha]_D^{20} = +403.23$  ( $c = 0.12$ , MeOH). **<sup>1</sup>H NMR** (400 MHz, CDCl<sub>3</sub>)  $\delta$ : 8.22 (s, 1H), 7.66 (dd,  $J = 7.9, 1.6$  Hz, 2H), 7.60 (dd,  $J = 6.4, 1.5$  Hz, 1H), 7.52 (d,  $J = 2.4$  Hz, 1H), 7.50-7.40 (m, 3H), 7.33 (d,  $J = 8.2$  Hz, 1H), 7.18-7.13 (m, 1H), 7.12-7.07 (m, 1H), 7.02 (ddd,  $J = 14.2, 7.0, 1.4$  Hz, 2H), 6.86 (t,  $J = 7.0$  Hz, 1H), 6.81 (d,  $J = 8.1$  Hz, 1H), 6.41 (s, 1H), 6.23-5.88 (m, 1H), 2.39 (s, 3H). **<sup>13</sup>C NMR** (126 MHz, CDCl<sub>3</sub>)  $\delta$ : 140.8, 140.6, 136.4, 134.8, 133.9, 133.3, 130.7 (d,  $J = 3.2$  Hz), 128.9, 128.6, 128.3, 125.8, 123.5 (d,  $J = 3.1$  Hz), 122.6, 122.5, 120.5, 119.9, 119.7, 119.2, 119.0, 117.0 (d,  $J = 3.1$  Hz), 114.9, 111.3, 110.6 (d,  $J = 4.2$  Hz), 108.5, 104.3, 70.0 (t,  $J = 23.7$  Hz), 9.7. **<sup>19</sup>F NMR** (376 MHz, CDCl<sub>3</sub>)  $\delta$ : -120.12 (dd,  $J = 1622.0, 276.9$  Hz). IR (ATR)  $\nu_{max}$ : 3410, 2923, 1455, 1334, 1056, 740, 700 cm<sup>-1</sup>. **HRMS** (ESI):  $m/z$  calcd. for C<sub>27</sub>H<sub>20</sub>N<sub>2</sub>F<sub>2</sub> [M+H]<sup>+</sup>: 411.1667; found: 411.1671. **HPLC analysis**: The enantiomeric excess was determined by HPLC with Chiralpak IA column (hexane/*i*-PrOH = 90/10, flow rate 1 mL·min<sup>-1</sup>,  $\lambda = 254$  nm):  $t_{major} = 11.5$  min,  $t_{minor} = 20.7$  min.

#### j. The scale-up experiment

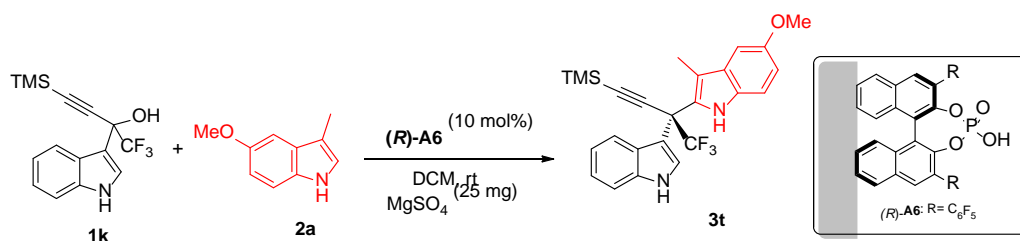

To a solution of  $\alpha$ -indolyl propargylic alcohol **1k** (1.00 mmol, 1.0 equiv.), MgSO<sub>4</sub> (500 mg), and catalyst (*R*)-**A6** (0.10 mmol, 10 mol%) in DCM (10 mL) was added indole **2a** (1.10 mmol, 1.1 equiv.). The mixture was stirred at at room temperature until the reaction was completed (monitored by TLC analysis). The crude product was purified directly by flash column chromatography on silica gel (petroleum ether/ ethyl acetate = 20:1~5:1) to give the desired chiral product **3k** with 377.28 mg, 83% yield and 95:5 *er*.

## 5. Experimental Procedure and Characterization Data of Compounds 9~18.

### a. The transformation of (*R*)-3ac to compound 9

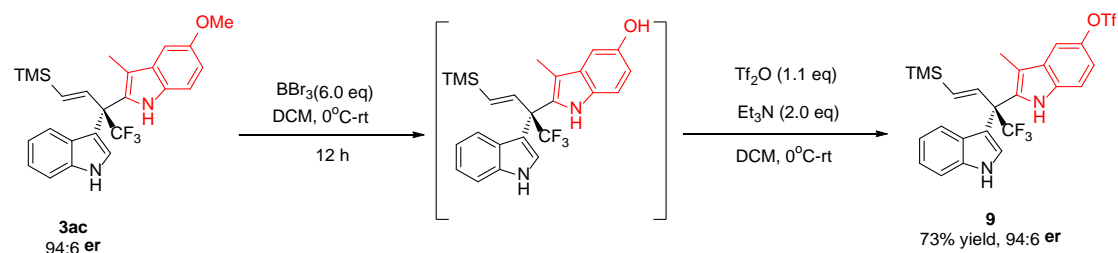

A solution of **3ac** (0.10 mmol, 1.0 equiv) in dry CH<sub>2</sub>Cl<sub>2</sub> (2 mL) was cooled to 0 °C, BBr<sub>3</sub> (0.6 mmol, 6.0 equiv) was added dropwise over 15 min. Then the resulting mixture was allowed to slowly warm to room temperature and stirred for another 12 h. Water (1 mL) and saturated NaHCO<sub>3</sub> (5 mL) were added to quench the reaction after completion (indicated by TLC). The reaction mixture was adjusted to a neutral pH by saturated ammonia solution followed by extracting with CH<sub>2</sub>Cl<sub>2</sub> (2×10 mL). The combined organic phases were washed with brine and dried over Na<sub>2</sub>SO<sub>4</sub>. Removal of the solvent afforded a pale-yellow oil which was used for next step without further purification.

At 0 °C, to a solution of the crude product (0.09 mmol, 1.0 equiv) and Et<sub>3</sub>N (0.54 mmol, 6.0 equiv) in DCM (2 mL) was slowly added Tf<sub>2</sub>O (0.099 mmol, 1.1 equiv) over 1 min. The reaction mixture was stirred at 0 °C for 30 min, and then at room temperature for 1 h. Next, water (10 mL) was added, and the reaction mixture was extracted with DCM (3×10 mL). The combined organic layers were dried over anhydrous Na<sub>2</sub>SO<sub>4</sub> and concentrated. The residue was purified by silica gel flash chromatography to afford the desired product (eluent: hexanes/EtOAc = 30:1~20:1) to give the desired compound **9**.

(*R,E*)-3-methyl-2-(1,1,1-trifluoro-2-(1*H*-indol-3-yl)-4-(trimethylsilyl)but-3-en-2-yl)-1*H*-indol-5-yl trifluoromethanesulfonate (**9**)

colorless oil, 73% yield, 94:6 *er*,  $[\alpha]_D^{20} = -114.00$  (c = 0.18, MeOH). **<sup>1</sup>H NMR** (400 MHz, CDCl<sub>3</sub>) δ: 7.47 (d, *J* = 2.3 Hz, 1H), 7.41 (d, *J* = 8.8 Hz, 1H), 7.18-7.00 (m, 3H), 6.79 (t, *J* = 7.5 Hz, 1H), 6.60 (d, *J* = 7.8 Hz, 1H), 6.37 (dd, *J* = 7.7, 3.8 Hz, 1H), 6.01 (d, *J* = 19.0 Hz, 1H), 5.64 (d, *J* = 19.0 Hz, 1H), 4.95 (d, *J* = 7.6 Hz, 1H), 4.78 (d, *J* = 3.2 Hz, 1H), 2.13 (s, 3H), -0.10 (s, 9H). **<sup>13</sup>C NMR** (126 MHz, CDCl<sub>3</sub>) δ: 149.1, 143.8, 137.6, 136.5, 135.7, 134.4, 130.5, 129.4, 127.6, 127.3 (q, *J* = 282.8 Hz), 124.6, 119.8, 119.0 (q, *J* = 320.9 Hz), 115.2, 112.4, 110.9, 110.6, 107.3, 73.8, 59.6 (q, *J* = 26.0 Hz), 58.6, 8.7, -1.7. **<sup>19</sup>F NMR** (376 MHz, CDCl<sub>3</sub>) δ: -72.10, -72.79. IR (ATR)  $\nu_{max}$ : 3408, 2974, 1439, 1447, 1138, 857, 742 cm<sup>-1</sup>. **HRMS** (ESI): *m/z* calcd. for C<sub>25</sub>H<sub>24</sub>N<sub>2</sub>O<sub>3</sub>F<sub>6</sub>SiS [M+H]<sup>+</sup>: 575.1254; found: 575.1267. **HPLC analysis**: The enantiomeric excess was determined by HPLC with Chiralpak IA column (hexane/*i*-PrOH = 95/5, flow rate 1 mL·min<sup>-1</sup>, λ = 254 nm): *t*<sub>major</sub> = 6.7 min, *t*<sub>minor</sub> = 7.8 min.

### b. The transformations of 3t to compounds 10~12



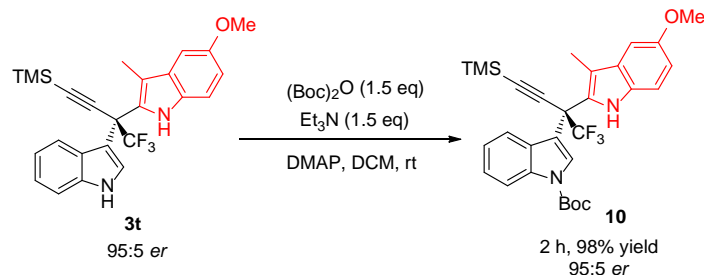

To a solution of **3t** (0.10 mmol, 1.0 equiv),  $\text{Et}_3\text{N}$  (0.15 mmol, 1.5 equiv) and DMAP (0.01 mmol, 10 mol%) in DCM (2 mL) was added dropwise the solution of  $(\text{Boc})_2\text{O}$  (0.15 mmol, 1.5 equiv) in DCM (1 mL). The mixture was further stirred at room temperature for 2 h. Next, water (10 mL) was added. The layers were separated, and the aqueous layer was extracted with ethyl acetate (3x10 mL). The combined organic layers were washed with brine (10 mL), dried over anhydrous  $\text{Na}_2\text{SO}_4$ , filtered, and concentrated. The crude product was purified directly by flash column chromatography on silica gel (petroleum ether/ ethyl acetate = 20:1) to give the desired compound **10**.

(*S*)-*tert*-butyl 3-(1,1,1-trifluoro-2-(5-methoxy-3-methyl-1*H*-indol-2-yl)-4-(trimethylsilyl)but-3-yn-2-yl)-1*H*-indole-1-carboxylate (**10**)

colorless oil, 2 h, 98% yield, 95:5 *er*,  $[\alpha]_D^{20} = +43.33$  ( $c = 0.60$ , MeOH).  **$^1\text{H NMR}$**  (500 MHz,  $\text{CDCl}_3$ )  $\delta$ : 8.17 (d,  $J = 7.7$  Hz, 1H), 8.06 (s, 1H), 7.85 (s, 1H), 7.29 (t,  $J = 7.8$  Hz, 1H), 7.20 (t,  $J = 9.4$  Hz, 2H), 7.04 (t,  $J = 7.6$  Hz, 1H), 6.97 (s, 1H), 6.87 (d,  $J = 8.8$  Hz, 1H), 3.85 (s, 3H), 2.17 (s, 3H), 1.73 (s, 9H), 0.21 (s, 9H).  **$^{13}\text{C NMR}$**  (126 MHz,  $\text{CDCl}_3$ )  $\delta$ : 154.1, 149.7, 135.5, 130.1, 129.8, 127.3 (q,  $J = 235.3$  Hz), 125.3, 125.0, 124.1, 122.9, 121.0, 115.2, 114.6, 113.4, 112.2, 111.9, 100.6, 98.6, 92.9, 84.6, 81.2, 56.0, 47.6 (q,  $J = 31.1$  Hz), 28.3, 9.4, -0.3.  **$^{19}\text{F NMR}$**  (471 MHz,  $\text{CDCl}_3$ )  $\delta$ : -70.46. IR (ATR)  $\nu_{\text{max}}$ : 2983, 1806, 1741, 1371, 1114, 1062, 843  $\text{cm}^{-1}$ . **HRMS (ESI)**:  $m/z$  calcd. for  $\text{C}_{30}\text{H}_{37}\text{N}_2\text{O}_3\text{F}_3\text{Si}$   $[\text{M}+\text{H}]^+$ : 559.2598; found: 559.2853. **HPLC analysis**: The enantiomeric excess was determined by HPLC with Chiralpak AD-H column (hexane/*i*-PrOH = 99/1, flow rate 0.8  $\text{mL}\cdot\text{min}^{-1}$ ,  $\lambda = 254$  nm):  $t_{\text{major}} = 5.9$  min,  $t_{\text{minor}} = 6.2$  min.

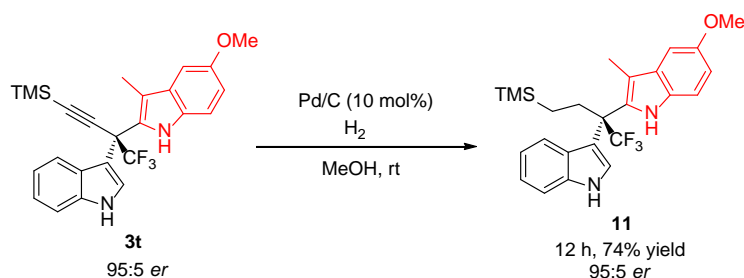

To a solution of **3t** (0.10 mmol, 1.0 equiv) in MeOH (5.0 mL) was added Pd/C (10 mol%). The mixture was stirred with a hydrogen balloon at room temperature for 12 h. It was then filtered and washed with MeOH. After the solvent was removed under vacuum, the crude product was purified directly by flash column chromatography on silica gel (petroleum ether/ ethyl acetate = 10:1) to give the desired compound **11**.

(*R*)-5-methoxy-3-methyl-2-(1,1,1-trifluoro-2-(1*H*-indol-3-yl)-4-(trimethylsilyl)butan-2-yl)-1*H*-indole (**11**)  
 colorless oil, 12 h, 74% yield, 95:5 *er*,  $[\alpha]_D^{20} = +19.38$  ( $c = 0.16$ , MeOH).  **$^1\text{H NMR}$**  (500 MHz,  $\text{CDCl}_3$ )  $\delta$ : 8.26 (s, 1H), 7.94 (s, 1H), 7.39 (d,  $J = 8.2$  Hz, 1H), 7.33 (s, 1H), 7.18-7.10 (m, 2H), 6.97 (s, 1H), 6.92-6.77 (m, 3H), 3.87 (s, 3H), 2.90-2.51 (m, 2H), 2.03 (s, 3H), 0.68-0.44 (m, 1H), 0.42-0.24 (m, 1H), -0.06 (s, 9H).  **$^{13}\text{C NMR}$**  (126 MHz,  $\text{CDCl}_3$ )  $\delta$ : 153.9, 136.3, 131.0, 130.1, 129.8, 128.4 (q,  $J = 285.8$  Hz), 126.4, 124.0, 122.5, 121.1, 120.2, 112.6, 112.4, 111.6, 111.2, 110.6, 100.5, 56.0, 52.6 (q,  $J = 24.5$  Hz), 29.6, 11.5, 10.1, -1.8.  **$^{19}\text{F NMR}$**  (471 MHz,  $\text{CDCl}_3$ )

$\delta$ : -67.91. IR (ATR)  $\nu_{\max}$ : 3409, 2952, 1485, 1130, 849, 738  $\text{cm}^{-1}$ . (ESI):  $m/z$  calcd. for  $\text{C}_{25}\text{H}_{29}\text{N}_2\text{OF}_3\text{Si}$  [M-H]<sup>-</sup>: 457.1928; found: 457.1911. **HPLC analysis:** The enantiomeric excess was determined by HPLC with Chiralpak IA column (hexane/*i*-PrOH = 90/10, flow rate 1  $\text{mL}\cdot\text{min}^{-1}$ ,  $\lambda$  = 254 nm):  $t_{\text{major}}$  = 7.1 min,  $t_{\text{minor}}$  = 6.1 min.

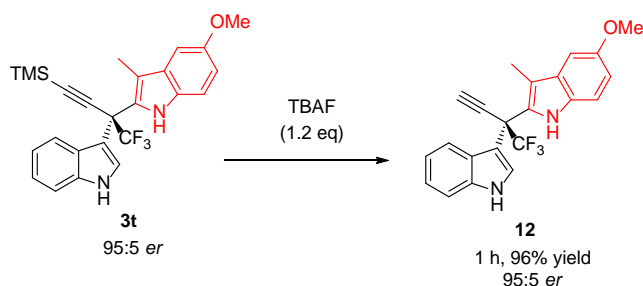

To a solution of **3t** (0.10 mmol, 1.0 equiv) in anhydrous THF (2 mL) at 0°C was added 0.12 mL 1 M TBAF in THF (0.12 mmol) under  $\text{N}_2$ . The mixture was further stirred at 0°C for other 1 h. Saturated  $\text{NH}_4\text{Cl}$  was added to quench the reaction after completion (indicated by TLC). The reaction mixture was extracted with  $\text{CH}_2\text{Cl}_2$  (3×10 mL). The combined organic phases were washed with brine and dried over  $\text{Na}_2\text{SO}_4$ . The crude product was purified directly by flash column chromatography on silica gel (petroleum ether/ ethyl acetate = 10:1) to give the desired compound **12**.

(*R*)-5-methoxy-3-methyl-2-(1,1,1-trifluoro-2-(1*H*-indol-3-yl)but-3-yn-2-yl)-1*H*-indole (**12**) white foam, 1 h, 96% yield, 95:5 *er*,  $[\alpha]_D^{20}$  = +43.24 ( $c$  = 0.34, MeOH). **<sup>1</sup>H NMR** (500 MHz,  $\text{CDCl}_3$ )  $\delta$ : 8.29 (s, 1H), 8.20 (s, 1H), 7.49-7.34 (m, 2H), 7.20 (t,  $J$  = 8.7 Hz, 3H), 6.96 (d,  $J$  = 9.6 Hz, 2H), 6.89 (d,  $J$  = 8.8 Hz, 1H), 3.86 (s, 3H), 2.74 (s, 1H), 2.05 (s, 3H). **<sup>13</sup>C NMR** (126 MHz,  $\text{CDCl}_3$ )  $\delta$ : 154.1, 136.3, 130.2, 129.8, 126.0, 125.6 (q,  $J$  = 285.0 Hz), 125.5, 122.9, 120.4, 120.4, 113.3, 112.0, 111.9, 111.4, 109.8, 100.7, 78.7, 75.1, 56.0, 47.0 (q,  $J$  = 31.2 Hz), 9.2. **<sup>19</sup>F NMR** (471 MHz,  $\text{CDCl}_3$ )  $\delta$ : -70.52. IR (ATR)  $\nu_{\max}$ : 3411, 2926, 1485, 1168, 728  $\text{cm}^{-1}$ . **HRMS** (ESI):  $m/z$  calcd. for  $\text{C}_{22}\text{H}_{17}\text{N}_2\text{OF}_3$  [M-H]<sup>-</sup>: 381.1220; found: 381.1209. **HPLC analysis:** The enantiomeric excess was determined by HPLC with Chiralpak IA column (hexane/*i*-PrOH = 90/10, flow rate 1  $\text{mL}\cdot\text{min}^{-1}$ ,  $\lambda$  = 280 nm):  $t_{\text{major}}$  = 15.6 min,  $t_{\text{minor}}$  = 16.7 min.

### c. The transformations of **12** to compounds **13**~**14**

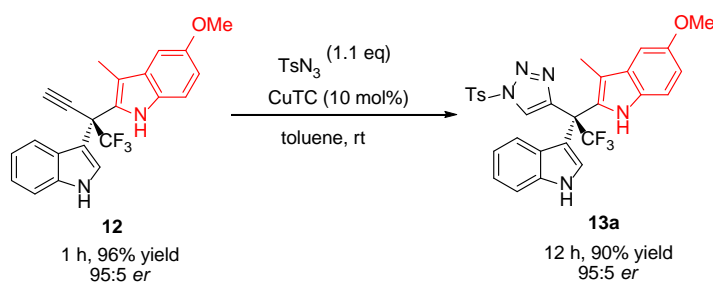

Under  $\text{N}_2$ , to a vial charged with **12** (0.1 mmol, 1.0 equiv),  $\text{CuTC}$  (0.01 mmol, 0.1 equiv), and toluene (2 mL) was added 4-methylbenzenesulfonyl azide (0.11 mmol, 1.1 equiv). The solution was stirred at room temperature for 12 h. Upon completion, water (2 mL) was added. The layers were separated, and the aqueous layer was extracted with ethyl acetate (3×10 mL). The combined organic layers were washed with brine (10 mL), dried over anhydrous  $\text{Na}_2\text{SO}_4$ , filtered, and concentrated. The residue was purified by silica gel chromatography (petroleum ether/ ethyl acetate = 5:1) to afford the desired product **13a**.

(*R*)-5-methoxy-3-methyl-2-(2,2,2-trifluoro-1-(1*H*-indol-3-yl)-1-(1-tosyl-1*H*-1,2,3-triazol-4-yl)ethyl)-1*H*-indole

**(13a)**

white foam, 12 h, 90% yield, 95:5 *er*,  $[\alpha]_D^{20} = -13.04$  ( $c = 0.23$ , MeOH). **<sup>1</sup>H NMR** (500 MHz, CDCl<sub>3</sub>)  $\delta$ : 10.14 (s, 1H), 8.48 (s, 1H), 7.85 (d,  $J = 8.2$  Hz, 2H), 7.51 (d,  $J = 11.4$  Hz, 2H), 7.43 (d,  $J = 8.2$  Hz, 1H), 7.36 (d,  $J = 8.1$  Hz, 2H), 7.29 (d,  $J = 8.8$  Hz, 1H), 7.15 (t,  $J = 7.6$  Hz, 1H), 6.88 (dd,  $J = 8.8, 1.9$  Hz, 1H), 6.84 (s, 1H), 6.72 (t,  $J = 7.5$  Hz, 1H), 6.43 (d,  $J = 8.1$  Hz, 1H), 3.81 (s, 3H), 2.45 (s, 3H), 1.45 (s, 3H). **<sup>13</sup>C NMR** (126 MHz, CDCl<sub>3</sub>)  $\delta$ : 153.8, 147.9, 147.1, 136.3, 132.5, 130.7, 130.2, 129.9, 129.5, 128.8, 126.8, 126.6, 126.1 (q,  $J = 101.8$  Hz), 123.5, 123.5, 122.9, 120.3, 120.2, 113.2, 112.5, 112.1, 111.6, 110.9, 100.5, 56.0, 49.9 (q,  $J = 29.1$  Hz), 22.0, 8.7. **<sup>19</sup>F NMR** (471 MHz, CDCl<sub>3</sub>)  $\delta$ : -69.40. IR (ATR)  $\nu_{max}$ : 3351, 2925, 1215, 1159, 1009 cm<sup>-1</sup>. **HRMS** (ESI):  $m/z$  calcd. for C<sub>29</sub>H<sub>24</sub>N<sub>5</sub>O<sub>3</sub>F<sub>3</sub>S [M-H]<sup>-</sup>: 578.1479; found: 578.1468. **HPLC analysis**: The enantiomeric excess was determined by HPLC with Chiralpak IA column (hexane/*i*-PrOH = 80/20, flow rate 1 mL·min<sup>-1</sup>,  $\lambda = 245$  nm):  $t_{major} = 10.1$  min,  $t_{minor} = 11.1$  min.

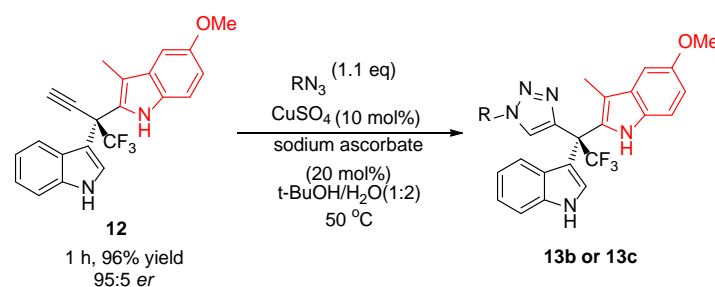

To a solution of **12** (0.10 mmol, 1.0 equiv) and the corresponding azide (0.11 mmol, 1.1 equiv) in *t*-BuOH (2 mL) was added dropwise the solution of CuSO<sub>4</sub> (0.01 mmol, 0.1 equiv) and sodium ascorbate (0.02 mmol, 0.2 equiv) in 4.0 mL H<sub>2</sub>O. The mixture was further stirred at 50 °C for 12 h, and then allowed to cool to room temperature after completion (indicated by TLC). The reaction was diluted with ethyl acetate (3×10 mL), washed with saturated NH<sub>4</sub>OH solution, and the organic phase was dried over Na<sub>2</sub>SO<sub>4</sub>. The crude product was purified directly by flash column chromatography on silica gel (petroleum ether/ ethyl acetate = 5:1) to give the desired compound **13b** and **13c**.

(*R*)-2-(1-(1-benzyl-1*H*-1,2,3-triazol-4-yl)-2,2,2-trifluoro-1-(1*H*-indol-3-yl)ethyl)-5-methoxy-3-methyl-1*H*-indole

**(13b)**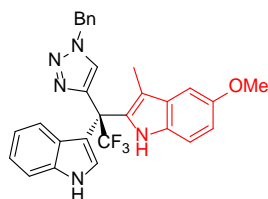

white foam, 12 h, 86% yield, 95:5 *er*,  $[\alpha]_D^{20} = +13.00$  ( $c = 0.10$ , MeOH). **<sup>1</sup>H NMR** (500 MHz, CDCl<sub>3</sub>)  $\delta$ : 10.67 (s, 1H), 8.37 (s, 1H), 7.40 (s, 1H), 7.29 (dd,  $J = 18.5, 8.5$  Hz, 2H), 7.21 (dd,  $J = 8.3, 4.4$  Hz, 3H), 7.05 (t,  $J = 7.6$  Hz, 1H), 7.00-6.94 (m, 2H), 6.87-6.76 (m, 3H), 6.66 (t,  $J = 7.6$  Hz, 1H), 6.48 (d,  $J = 8.1$  Hz, 1H), 5.39 (d,  $J = 15.2$  Hz, 1H), 5.29 (d,  $J = 15.2$  Hz, 1H), 3.75 (s, 3H), 1.41 (s, 3H). **<sup>13</sup>C NMR** (126 MHz, CDCl<sub>3</sub>)  $\delta$ : 153.7, 147.7, 136.2, 134.4, 130.1, 129.6, 129.1, 128.7, 127.8, 127.5, 126.4 (q,  $J = 103.4$  Hz), 123.2, 123.2, 122.6, 120.5, 120.1, 112.8, 112.2, 112.0, 111.8, 111.3, 100.5, 56.0, 54.2, 49.7 (q,  $J = 28.9$  Hz), 8.7. **<sup>19</sup>F NMR** (471 MHz, CDCl<sub>3</sub>)  $\delta$ : -69.66. IR (ATR)  $\nu_{max}$ : 3354, 2925, 1486, 1457, 1239, 1218, 1136 cm<sup>-1</sup>. **HRMS** (ESI):  $m/z$  calcd. for C<sub>29</sub>H<sub>24</sub>N<sub>5</sub>O<sub>3</sub>F<sub>3</sub> [M-H]<sup>-</sup>: 514.1860; found: 514.1842. **HPLC analysis**: The enantiomeric excess was determined by HPLC with Chiralpak IA column (hexane/*i*-PrOH = 80/20, flow rate 1 mL·min<sup>-1</sup>,  $\lambda = 280$  nm):  $t_{major} = 16.4$  min,  $t_{minor} = 12.5$  min.

(*R*)-ethyl 2-(4-(2,2,2-trifluoro-1-(1*H*-indol-3-yl)-1-(5-methoxy-3-methyl-1*H*-indol-2-yl)ethyl)-1*H*-1,2,3-triazol-1-yl)acetate (**13c**)

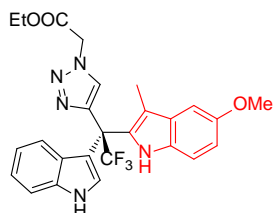

white foam, 12 h, 99% yield, 95:5 *er*,  $[\alpha]_D^{20} = +5.33$  ( $c = 0.15$ , MeOH). **<sup>1</sup>H NMR** (500 MHz, CDCl<sub>3</sub>)  $\delta$ : 10.55 (s, 1H), 8.42 (s, 1H), 7.50 (s, 1H), 7.39 (d,  $J = 8.2$  Hz, 1H), 7.33 (d,  $J = 8.7$  Hz, 1H), 7.12 (t,  $J = 7.6$  Hz, 1H), 7.04 (s, 1H), 6.92-6.83 (m, 2H), 6.74 (t,  $J = 7.5$  Hz, 1H), 6.58 (d,  $J = 8.1$  Hz, 1H), 5.06 (d,  $J = 17.6$  Hz, 1H), 4.97 (d,  $J = 17.6$  Hz, 1H), 4.15 (q,  $J = 7.3$  Hz, 2H), 3.81 (s, 3H), 1.48 (s, 3H), 1.18 (t,  $J = 7.1$  Hz, 3H). **<sup>13</sup>C NMR** (126 MHz, CDCl<sub>3</sub>)  $\delta$ : 165.8, 153.7, 147.7, 136.2, 130.2, 129.6, 128.0, 127.7, 126.3 (q,  $J = 285.7$  Hz), 126.0, 123.3 (d,  $J = 2.4$  Hz), 122.7, 120.6, 120.2, 112.9, 112.2, 112.0, 111.7, 111.3, 100.5, 62.6, 56.0, 51.1, 49.7 (q,  $J = 28.7$  Hz), 14.0, 8.7. **<sup>19</sup>F NMR** (471 MHz, CDCl<sub>3</sub>)  $\delta$ : -69.56. IR (ATR)  $\nu_{max}$ : 3355, 2925, 1446, 1209, 1175, 1014 cm<sup>-1</sup>. **HRMS** (ESI):  $m/z$  calcd. for C<sub>26</sub>H<sub>24</sub>N<sub>5</sub>O<sub>3</sub>F<sub>3</sub> [M-H]<sup>-</sup>: 510.1758; found: 510.1739. **HPLC analysis**: The enantiomeric excess was determined by HPLC with Chiralpak IA column (hexane/*i*-PrOH = 80/20, flow rate 1 mL·min<sup>-1</sup>,  $\lambda = 254$  nm):  $t_{major} = 14.4$  min,  $t_{minor} = 13.2$  min.

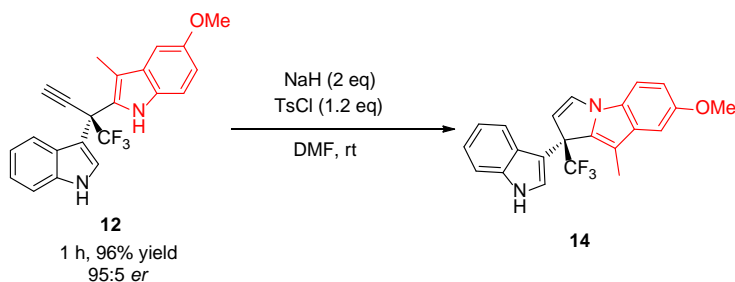

To a solution of **12** (0.10 mmol, 1.0 equiv) in DMF (2 mL) was added NaH (0.20 mmol, 2.0 equiv) at 0°C for other 30 min, then the solution of TsCl (0.12 mmol, 1.2 equiv) in DMF (1 mL) was added dropwise. The mixture was further stirred at room temperature for 12 h. The crude product was purified directly by flash column chromatography on silica gel (petroleum ether/ ethyl acetate = 10:1~5:1) to give the desired compound **14**.

(*R*)-1-(1*H*-indol-3-yl)-7-methoxy-9-methyl-1-(trifluoromethyl)-1*H*-pyrrolo[1,2-*a*]indole (**14**)  
white solid, 12 h, 97% yield, 95:5 *er*, M.p. 123.5-124.2 °C.  $[\alpha]_D^{20} = -473.43$  ( $c = 0.35$ , MeOH). **<sup>1</sup>H NMR** (500 MHz, CDCl<sub>3</sub>)  $\delta$ : 8.15 (s, 1H), 7.40-7.32 (m, 2H), 7.31 (s, 1H), 7.28 (d,  $J = 3.9$  Hz, 1H), 7.19 (t,  $J = 7.6$  Hz, 1H), 7.14 (d,  $J = 8.1$  Hz, 1H), 7.06 (s, 1H), 7.00 (dd,  $J = 15.3, 8.0$  Hz, 2H), 5.91 (d,  $J = 3.8$  Hz, 1H), 3.91 (s, 3H), 2.26 (s, 3H). **<sup>13</sup>C NMR** (126 MHz, CDCl<sub>3</sub>)  $\delta$ : 154.4, 137.4, 136.7, 133.2, 127.9, 126.8 (q,  $J = 284.0$  Hz), 125.7, 123.7, 123.7, 122.5, 120.2, 120.0, 114.0, 112.8, 111.5, 110.3, 110.2, 108.5, 102.2, 56.1, 55.6 (q,  $J = 30.6$  Hz), 9.0. **<sup>19</sup>F NMR** (471 MHz, CDCl<sub>3</sub>)  $\delta$ : -69.25. IR (ATR)  $\nu_{max}$ : 3321, 2954, 1413, 1213, 1166, 1008 cm<sup>-1</sup>. **HRMS** (ESI):  $m/z$  calcd. for C<sub>22</sub>H<sub>17</sub>N<sub>2</sub>OF<sub>3</sub> [M-H]<sup>-</sup>: 383.1366; found: 383.1361. **HPLC analysis**: The enantiomeric excess was determined by HPLC with Chiralcel OD-H column (hexane/*i*-PrOH = 95/5, flow rate 1 mL·min<sup>-1</sup>,  $\lambda = 245$  nm):  $t_{major} = 25.2$  min,  $t_{minor} = 23.6$  min.

#### d. The transformation of 5m to compound 15

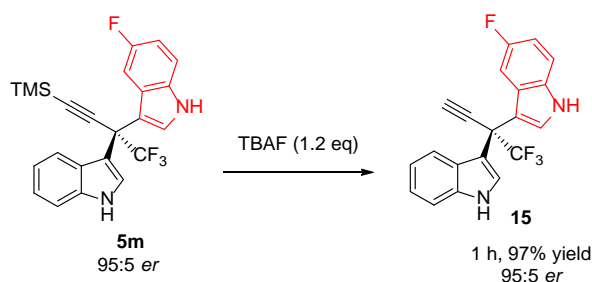

A solution of **5m** (0.10 mmol, 1.0 equiv) in anhydrous THF (2 mL) at 0 °C was added 0.12 mL 1 M TBAF in THF (0.12 mmol) under N<sub>2</sub>. The mixture was further stirred at 0°C for other 1 h. Saturated NH<sub>4</sub>Cl was added to quench the reaction after completion (indicated by TLC). The reaction mixture was extracted with CH<sub>2</sub>Cl<sub>2</sub> (3×10 mL). The combined organic phases were washed with brine and dried over Na<sub>2</sub>SO<sub>4</sub>. The crude product was purified directly by flash column chromatography on silica gel (petroleum ether/ ethyl acetate = 10:1) to give the desired compound **15**.

(*S*)-5-fluoro-3-(1,1,1-trifluoro-2-(1*H*-indol-3-yl)but-3-yn-2-yl)-1*H*-indole (**15**)

white foam, 1 h, 97% yield, 95:5 *er*,  $[\alpha]_D^{20} = +12.21$  ( $c = 0.22$ , MeOH). **<sup>1</sup>H NMR** (500 MHz, CDCl<sub>3</sub>)  $\delta$ : 8.12 (d,  $J = 16.0$  Hz, 2H), 7.48 (d,  $J = 8.1$  Hz, 1H), 7.38-7.31 (m, 3H), 7.22 (dd,  $J = 8.6, 4.2$  Hz, 1H), 7.17 (dd,  $J = 13.8, 5.2$  Hz, 2H), 6.98 (t,  $J = 7.6$  Hz, 1H), 6.90 (t,  $J = 9.0$  Hz, 1H), 2.68 (s, 1H). **<sup>13</sup>C NMR** (126 MHz, CDCl<sub>3</sub>)  $\delta$ : 157.7 (d,  $J = 234.2$  Hz), 136.6, 133.1, 126.2 (d,  $J = 11.3$  Hz), 126.2, 126.0 (q,  $J = 284.6$  Hz), 125.7, 124.3 (d,  $J = 1.2$  Hz), 122.5, 121.0, 120.0, 112.0 (d,  $J = 9.8$  Hz), 111.5 (d,  $J = 5.4$  Hz), 111.5, 111.1, 110.9 (d,  $J = 5.0$  Hz), 106.1 (d,  $J = 24.8$  Hz), 80.2, 74.0, 46.0 (q,  $J = 31.1$  Hz). **<sup>19</sup>F NMR** (471 MHz, CDCl<sub>3</sub>)  $\delta$ : -71.11, -123.51. IR (ATR)  $\nu_{\text{max}}$ : 3415, 2944, 1475, 1152, 734 cm<sup>-1</sup>. **HRMS** (ESI):  $m/z$  calcd. for C<sub>20</sub>H<sub>12</sub>N<sub>2</sub>F<sub>4</sub> [M-H]<sup>-</sup>: 355.0864; found: 355.0863. **HPLC analysis**: The enantiomeric excess was determined by HPLC with Chiralpak IA column (hexane/*i*-PrOH = 90/10, flow rate 1 mL·min<sup>-1</sup>,  $\lambda = 254$  nm):  $t_{\text{major}} = 28.2$  min,  $t_{\text{minor}} = 33.2$  min.

#### e. The transformation of **15** to compound **5n**

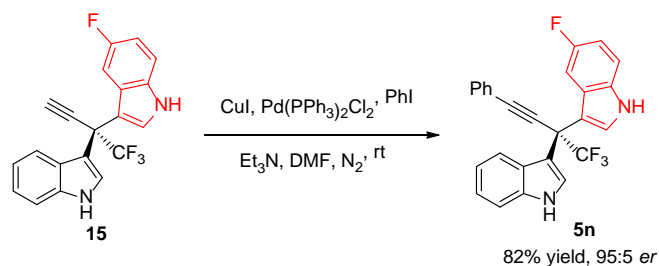

To a solution of **15** (0.1 mmol, 1.0 equiv), Pd(PPh<sub>3</sub>)<sub>2</sub>Cl<sub>2</sub> (0.01 mmol, 0.1 equiv), CuI (0.05 mmol, 0.5 equiv), and Et<sub>3</sub>N (0.5 mmol, 5 equiv) in anhydrous DMF (2.0 mL), was added iodobenzene (0.15 mmol, 1.5 equiv). The mixture was further stirred at room temperature for 24 h. After the solvent was removed under vacuum, the crude product was purified directly by flash column chromatography on silica gel (petroleum ether/ ethyl acetate = 10:1~5:1) to give the desired compound **5n** with 82% yield and 95:5 *er*.

#### f. The transformations of (*R*)-**7a** to compounds **16-18**

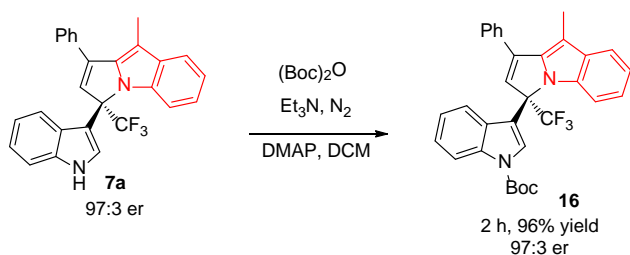

To a solution of **7a** (0.10 mmol, 1.0 equiv), Et<sub>3</sub>N (0.30 mmol, 3.0 equiv) and DMAP (0.02 mmol, 20 mol%) in DCM (2 mL) was added dropwise the solution of (Boc)<sub>2</sub>O (0.15 mmol, 1.5 equiv) in DCM (1 mL). The mixture was further stirred at room temperature for 2 h. After the solvent was removed under vacuum, the crude product was purified directly by flash column chromatography on silica gel (petroleum ether/ ethyl acetate = 10:1~5:1) to give the desired compound **16**.

(*R*)-*tert*-butyl 3-(9-methyl-1-phenyl-3-(trifluoromethyl)-3*H*-pyrrolo[1,2-*a*]indol-3-yl)-1*H*-indole-1-carboxylate (**16**) colorless oil, 2 h, 96% yield, 97:3 *er*,  $[\alpha]_D^{20} = +226.67$  ( $c = 0.33$ , MeOH). **<sup>1</sup>H NMR** (500 MHz, CDCl<sub>3</sub>)  $\delta$ : 8.13 (d,  $J = 8.0$  Hz, 1H), 8.01 (s, 1H), 7.67 (d,  $J = 6.8$  Hz, 2H), 7.63-7.58 (m, 1H), 7.54-7.38 (m, 3H), 7.21 (t,  $J = 7.8$  Hz, 1H), 7.15 (d,  $J = 8.0$  Hz, 1H), 7.07 (dd,  $J = 8.9, 5.0$  Hz, 2H), 6.93 (t,  $J = 7.6$  Hz, 1H), 6.53 (d,  $J = 8.1$  Hz, 1H), 6.31 (s, 1H), 2.42 (s, 3H), 1.73 (s, 9H). **<sup>13</sup>C NMR** (126 MHz, CDCl<sub>3</sub>)  $\delta$ : 152.3, 149.5, 142.3, 140.7, 135.4, 134.8, 133.9, 132.8, 129.2, 128.7, 128.3, 128.2, 128.0, 125.1 (q,  $J = 286.2$  Hz), 125.0, 124.9, 123.3 (d,  $J = 4.5$  Hz), 120.2, 119.7, 119.5, 115.3, 112.4, 110.4, 105.9, 84.7, 81.2, 69.8 (q,  $J = 31.5$  Hz), 28.3, 28.0, 9.7. **<sup>19</sup>F NMR** (471 MHz, CDCl<sub>3</sub>)  $\delta$ : -72.30. IR (ATR)  $\nu_{max}$ : 1736, 1452, 1368, 1457, 1151, 1096, 738 cm<sup>-1</sup>. **HRMS** (ESI):  $m/z$  calcd. for C<sub>32</sub>H<sub>27</sub>N<sub>2</sub>O<sub>2</sub>F<sub>3</sub> [M+H]<sup>+</sup>: 529.2097; found: 529.2097. **HPLC analysis**: The enantiomeric excess was determined by HPLC with Chiralpak AD-H column (hexane/*i*-PrOH = 99/1, flow rate 0.8 mL·min<sup>-1</sup>,  $\lambda = 280$  nm):  $t_{major} = 5.3$  min,  $t_{minor} = 5.0$  min.

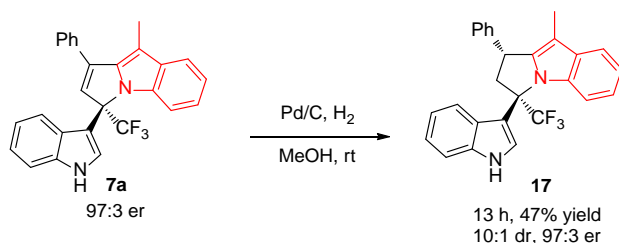

To a solution of **7a** (0.10 mmol, 1.0 equiv) in MeOH (5.0 mL) was added Pd/C (10 mol%). The mixture was stirred with a hydrogen balloon at room temperature for 13 h. It was then filtered and washed with MeOH. After the solvent was removed under vacuum, the crude product was purified directly by flash column chromatography on silica gel (petroleum ether/ ethyl acetate = 10:1) to give the desired compound **17**.

(1*R*,3*R*)-3-(1*H*-indol-3-yl)-9-methyl-1-phenyl-3-(trifluoromethyl)-2,3-dihydro-1*H*-pyrrolo[1,2-*a*]indole (**17**) light brown foam, 13 h, 47% yield, 97:3 *er*,  $d.r. = 10:1$ ,  $[\alpha]_D^{20} = +126.40$  ( $c = 0.25$ , MeOH). **<sup>1</sup>H NMR** (500 MHz, CDCl<sub>3</sub>)  $\delta$ : 8.04 (s, 1H), 7.56 (d,  $J = 7.9$  Hz, 1H), 7.40-7.34 (m, 3H), 7.33-7.27 (m, 4H), 7.20 (t,  $J = 7.6$  Hz, 1H), 7.14 (dd,  $J = 12.6, 7.8$  Hz, 2H), 7.06 (dd,  $J = 15.6, 8.0$  Hz, 2H), 6.92 (d,  $J = 1.9$  Hz, 1H), 4.59 (t,  $J = 8.4$  Hz, 1H), 3.67 (dd,  $J = 13.4, 9.4$  Hz, 1H), 3.18 (dd,  $J = 13.5, 7.6$  Hz, 1H), 2.02 (s, 3H). **<sup>13</sup>C NMR** (126 MHz, CDCl<sub>3</sub>)  $\delta$ : 142.5, 141.6, 136.8, 134.2, 132.5, 128.9, 128.0, 127.1, 126.3 (q,  $J = 285.2$  Hz), 124.7, 123.7, 122.8, 121.5, 120.7, 119.7 (d,  $J = 1.5$  Hz), 119.7, 118.8, 111.8, 111.7, 111.6 (d,  $J = 3.7$  Hz), 104.0, 67.7 (q,  $J = 31.2$  Hz), 49.5, 41.0, 8.5. **<sup>19</sup>F NMR** (471 MHz, CDCl<sub>3</sub>)  $\delta$ : -71.73. IR (ATR)  $\nu_{max}$ : 3410, 2920, 1451, 1165, 738, 699 cm<sup>-1</sup>. **HRMS** (ESI):  $m/z$  calcd. for C<sub>27</sub>H<sub>21</sub>N<sub>2</sub>F<sub>3</sub> [M-H]<sup>-</sup>: 429.1584; found: 429.1582. **HPLC analysis**: The enantiomeric excess

was determined by HPLC with Chiralpak IA column (hexane/*i*-PrOH = 90/10, flow rate 1 mL·min<sup>-1</sup>, λ = 254 nm):  $t_{\text{major}} = 6.9$  min,  $t_{\text{minor}} = 8.7$  min.

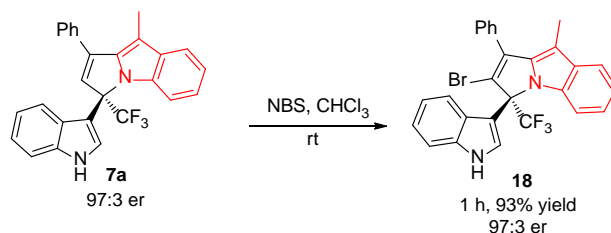

To a solution of **7a** (0.10 mmol, 1.0 equiv) in CHCl<sub>3</sub> (1 mL) was added dropwise the solution of NBS (0.12 mmol, 1.2 equiv) in CHCl<sub>3</sub> (0.5 mL). The mixture was further stirred at room temperature for 1 h. After the solvent was removed under vacuum, the crude product was purified directly by flash column chromatography on silica gel (petroleum ether/ ethyl acetate =10:1) to give the desired compound **18**.

(*R*)-2-bromo-3-(1*H*-indol-3-yl)-9-methyl-1-phenyl-3-(trifluoromethyl)-3*H*-pyrrolo[1,2-*a*]indole (**18**)

light brown solid, 1 h, 93% yield, 97:3 *er*, M.p. 120.4-120.9 °C.  $[\alpha]_D^{20} = +313.08$  (c = 0.13, MeOH). **<sup>1</sup>H NMR** (400 MHz, CDCl<sub>3</sub>) δ: 8.38 (s, 1H), 7.76-7.69 (m, 1H), 7.69-7.62 (m, 2H), 7.58-7.43 (m, 4H), 7.34 (t, *J* = 6.9 Hz, 1H), 7.14-7.05 (m, 1H), 7.04-6.97 (m, 1H), 6.96 (dd, *J* = 3.7, 1.9 Hz, 2H), 6.86-6.76 (m, 1H), 6.52 (d, *J* = 8.1 Hz, 1H), 2.18 (s, 3H). **<sup>13</sup>C NMR** (126 MHz, CDCl<sub>3</sub>) δ: 139.8, 139.6, 136.1, 135.5, 133.0, 131.7, 129.3 (d, *J* = 2.7 Hz), 128.7, 128.3, 125.2, 125.0 (q, *J* = 288.7 Hz), 124.9 (d, *J* = 3.2 Hz), 123.2, 122.9, 120.9, 120.1, 119.7, 119.2, 119.0, 111.5, 110.4 (d, *J* = 1.7 Hz), 106.8, 105.8, 72.8 (q, *J* = 30.7 Hz), 9.1. **<sup>19</sup>F NMR** (376 MHz, CDCl<sub>3</sub>) δ: -71.77. IR (ATR)  $\nu_{\text{max}}$ : 3412, 2923, 1262, 1237, 1174, 740 cm<sup>-1</sup>. **HRMS** (ESI): *m/z* calcd. for C<sub>27</sub>H<sub>18</sub>N<sub>2</sub>F<sub>3</sub>Br [M+H]<sup>+</sup>: 507.0678; found: 507.0671. **HPLC analysis**: The enantiomeric excess was determined by HPLC with Chiralpak IA column (hexane/*i*-PrOH = 95/5, flow rate 0.8 mL·min<sup>-1</sup>, λ = 254 nm):  $t_{\text{major}} = 15.6$  min,  $t_{\text{minor}} = 23.3$  min.

## 6. Data for X-Ray Crystal Structures of 5i, 14 and 18

**Table S5 Crystal data and structure refinement for 5i.**

|                                             |                                                                                    |
|---------------------------------------------|------------------------------------------------------------------------------------|
| Compound                                    | 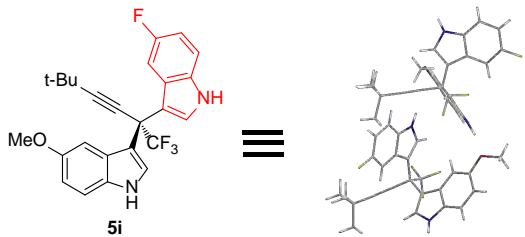 |
| Empirical formula                           | C <sub>25</sub> H <sub>22</sub> F <sub>4</sub> N <sub>2</sub> O                    |
| Formula weight                              | 442.44                                                                             |
| Temperature/K                               | 100.00(10)                                                                         |
| Crystal system                              | orthorhombic                                                                       |
| Space group                                 | P212121                                                                            |
| a/Å                                         | 10.3110(2)                                                                         |
| b/Å                                         | 12.3464(2)                                                                         |
| c/Å                                         | 34.9989(7)                                                                         |
| α/°                                         | 90                                                                                 |
| β/°                                         | 90                                                                                 |
| γ/°                                         | 90                                                                                 |
| Volume/Å <sup>3</sup>                       | 4455.49(14)                                                                        |
| Z                                           | 8                                                                                  |
| ρ <sub>calc</sub> /cm <sup>3</sup>          | 1.319                                                                              |
| μ/mm <sup>1</sup>                           | 0.881                                                                              |
| F(000)                                      | 1840.0                                                                             |
| Crystal size/mm <sup>3</sup>                | 0.15 × 0.15 × 0.05                                                                 |
| Radiation                                   | Cu Kα (λ = 1.54184)                                                                |
| 2θ range for data collection/°              | 5.05 to 154.51                                                                     |
| Index ranges                                | -13 ≤ h ≤ 12, -13 ≤ k ≤ 15, -44 ≤ l ≤ 36                                           |
| Reflections collected                       | 55083                                                                              |
| Independent reflections                     | 9142 [R <sub>int</sub> = 0.1344, R <sub>sigma</sub> = 0.0712]                      |
| Data/restraints/parameters                  | 9142/0/590                                                                         |
| Goodness-of-fit on F <sup>2</sup>           | 1.051                                                                              |
| Final R indexes [I ≥ 2σ (I)]                | R <sub>1</sub> = 0.0517, wR <sub>2</sub> = 0.1200                                  |
| Final R indexes [all data]                  | R <sub>1</sub> = 0.0718, wR <sub>2</sub> = 0.1343                                  |
| Largest diff. peak/hole / e Å <sup>-3</sup> | 0.29/-0.28                                                                         |
| Flack parameter                             | 0.11(8)                                                                            |



**Table S6 Crystal data and structure refinement for 14.**

|                                             |                                                                                    |
|---------------------------------------------|------------------------------------------------------------------------------------|
| Compound                                    | 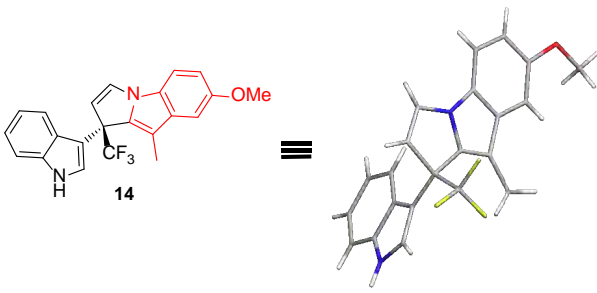 |
| Empirical formula                           | C <sub>22</sub> H <sub>17</sub> F <sub>3</sub> N <sub>2</sub> O                    |
| Formula weight                              | 382.37                                                                             |
| Temperature/K                               | 100.00(10)                                                                         |
| Crystal system                              | monoclinic                                                                         |
| Space group                                 | P21                                                                                |
| a/Å                                         | 9.40350(10)                                                                        |
| b/Å                                         | 10.62490(10)                                                                       |
| c/Å                                         | 9.51730(10)                                                                        |
| α/°                                         | 90                                                                                 |
| β/°                                         | 95.3790(10)                                                                        |
| γ/°                                         | 90                                                                                 |
| Volume/Å <sup>3</sup>                       | 946.698(17)                                                                        |
| Z                                           | 2                                                                                  |
| ρ <sub>calc</sub> /cm <sup>3</sup>          | 1.341                                                                              |
| μ/mm <sup>1</sup>                           | 0.873                                                                              |
| F(000)                                      | 396.0                                                                              |
| Crystal size/mm <sup>3</sup>                | 0.05 × 0.05 × 0.1                                                                  |
| Radiation                                   | Cu Kα (λ = 1.54184)                                                                |
| 2θ range for data collection/°              | 9.334 to 153.526                                                                   |
| Index ranges                                | -10 ≤ h ≤ 11, -13 ≤ k ≤ 13, -12 ≤ l ≤ 12                                           |
| Reflections collected                       | 19789                                                                              |
| Independent reflections                     | 3896 [R <sub>int</sub> = 0.0419, R <sub>sigma</sub> = 0.0295]                      |
| Data/restraints/parameters                  | 3896/1/256                                                                         |
| Goodness-of-fit on F <sup>2</sup>           | 1.072                                                                              |
| Final R indexes [I ≥ 2σ (I)]                | R <sub>1</sub> = 0.0302, wR <sub>2</sub> = 0.0767                                  |
| Final R indexes [all data]                  | R <sub>1</sub> = 0.0307, wR <sub>2</sub> = 0.0771                                  |
| Largest diff. peak/hole / e Å <sup>-3</sup> | 0.21/-0.19                                                                         |

**Table S7 Crystal data and structure refinement for 18.**

|                                             |                                                                                    |
|---------------------------------------------|------------------------------------------------------------------------------------|
| Compound                                    | 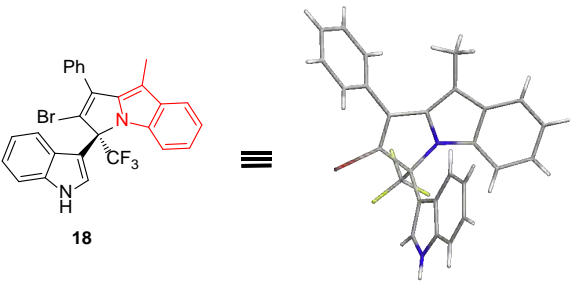 |
| Empirical formula                           | C <sub>27</sub> H <sub>18</sub> BrF <sub>3</sub> N <sub>2</sub>                    |
| Formula weight                              | 507.34                                                                             |
| Temperature/K                               | 300.28(15)                                                                         |
| Crystal system                              | orthorhombic                                                                       |
| Space group                                 | P2 <sub>1</sub> 2 <sub>1</sub> 2 <sub>1</sub>                                      |
| a/Å                                         | 10.1505(2)                                                                         |
| b/Å                                         | 19.0261(9)                                                                         |
| c/Å                                         | 11.5778(4)                                                                         |
| α/°                                         | 90                                                                                 |
| β/°                                         | 90                                                                                 |
| γ/°                                         | 90                                                                                 |
| Volume/Å <sup>3</sup>                       | 2235.96(14)                                                                        |
| Z                                           | 4                                                                                  |
| ρ <sub>calc</sub> /cm <sup>3</sup>          | 1.507                                                                              |
| μ/mm <sup>-1</sup>                          | 2.876                                                                              |
| F(000)                                      | 1024.0                                                                             |
| Crystal size/mm <sup>3</sup>                | 0.075 × 0.05 × 0.05                                                                |
| Radiation                                   | Cu Kα (λ = 1.54184)                                                                |
| 2θ range for data collection/°              | 8.94 to 153.626                                                                    |
| Index ranges                                | -12 ≤ h ≤ 12, -22 ≤ k ≤ 23, -14 ≤ l ≤ 14                                           |
| Reflections collected                       | 22787                                                                              |
| Independent reflections                     | 4631 [R <sub>int</sub> = 0.0950, R <sub>sigma</sub> = 0.0497]                      |
| Data/restraints/parameters                  | 4631/0/299                                                                         |
| Goodness-of-fit on F <sup>2</sup>           | 1.111                                                                              |
| Final R indexes [I >= 2σ (I)]               | R <sub>1</sub> = 0.0748, wR <sub>2</sub> = 0.2167                                  |
| Final R indexes [all data]                  | R <sub>1</sub> = 0.0832, wR <sub>2</sub> = 0.2233                                  |
| Largest diff. peak/hole / e Å <sup>-3</sup> | 0.57/-0.65                                                                         |

## 7. Mechanistic Experiments

### a. Observation of kinetic resolution

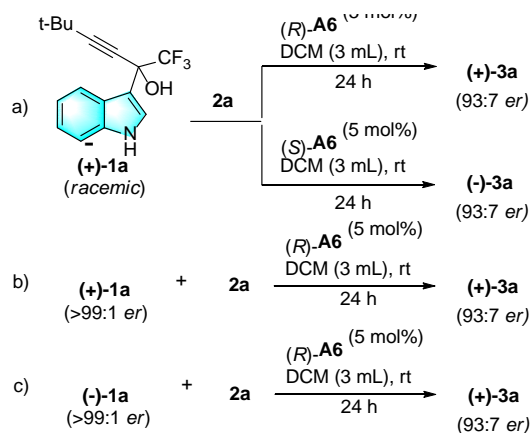

To a solution of  $\alpha$ -indolyl propargylic alcohols **1a** (0.10 mmol, 1.0 equiv.) and (*R*- or (*S*)-**A6** (0.005 mmol, 5 mol%) in DCM (3 mL) was added indole **2a** (0.12 mmol, 1.2 equiv.). The mixture was stirred at room temperature for 24 h. At this time the reaction was quenched by Et<sub>3</sub>N (1 drop). The remaining starting material **1a** and product **3a** were isolated by preparative thin layer chromatography, the corresponding ee values were determined by HPLC.

The products with opposite chirality can be isolated in similar yield after subjecting racemic **1a** to chiral (*R*- or (*S*) phosphoric acid catalyst **A6**. Using same (*R*)-**A6** catalyst, both (+)-**1a** and (-)-**1a** reacted with **2a** to deliver product (+)-**3a** with same configuration.

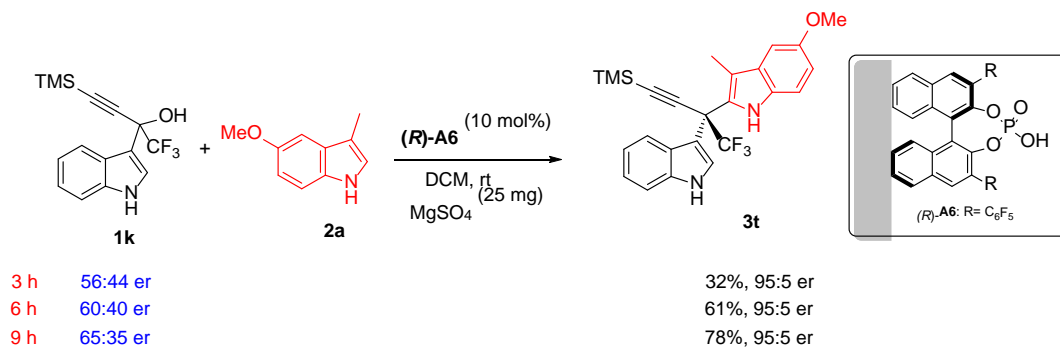

To a solution of  $\alpha$ -indolyl propargylic alcohol **1k** (0.10 mmol, 1.0 equiv.), MgSO<sub>4</sub> (25 mg), and catalyst (*R*)-**A6** (0.01 mmol, 10 mol%) in DCM (1 mL) was added indole **2a** (0.12 mmol, 1.2 equiv.). Then 12.3  $\mu$ L PhCF<sub>3</sub> (0.10 mmol) was added as NMR internal standard. The mixture was stirred at room temperature and monitored every 3 h by taking an aliquot (0.2 mL) of the reaction mixture by syringe. The aliquot was quenched by Et<sub>3</sub>N (1 drop). Analysis of the crude reaction by quantitative <sup>19</sup>F NMR indicated the formation and the yield of **3t**. The remaining starting material **1k** and product **3t** were then isolated by preparative thin layer chromatography, the corresponding e.e. values were determined by HPLC.

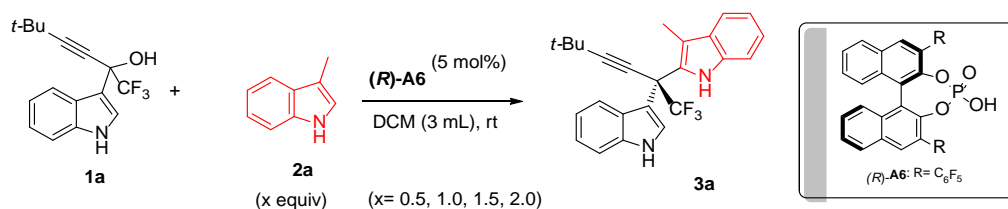

To a solution of  $\alpha$ -indolyl propargylic alcohols **1a** (0.10 mmol, 1.0 equiv.), and catalyst **(R)-A6** (0.005 mmol, 5 mol%) in DCM (3 mL) was added indole **2a** (A: 0.05 mmol, 0.5 equiv.; B: 0.10 mmol, 1.0 equiv.; C: 0.15 mmol, 1.5 equiv.; D: 0.20 mmol, 2.0 equiv.). Then 12.3  $\mu$ L PhCF<sub>3</sub> (0.10 mmol) was added as NMR internal standard. The mixture was stirred at room temperature and the initial rate was monitored every 30 min by taking an aliquot (0.2 mL) of the reaction mixture by syringe. The aliquot was quenched by Et<sub>3</sub>N (1 drop). Analysis of the crude reaction by quantitative <sup>19</sup>F NMR indicated the formation and the yield of **3a**. The remaining reaction product **3a** was isolated by preparative thin layer chromatography, the ee values of **3a** were determined by HPLC.

As shown below, the reactions carried out with different initial concentration of **2a** produce good overlay in the enantiomeric excess data of product **3a**, indicating that no catalyst decomposition or product inhibition in this process. The variations on the initial concentrations of **2a** (with same initial concentration of **1a**) produce good consistency in the reaction rate, which shows that the reaction is zeroth-order for **2a**, it has no rate dependence on the initial concentration of the nucleophile **2a**.

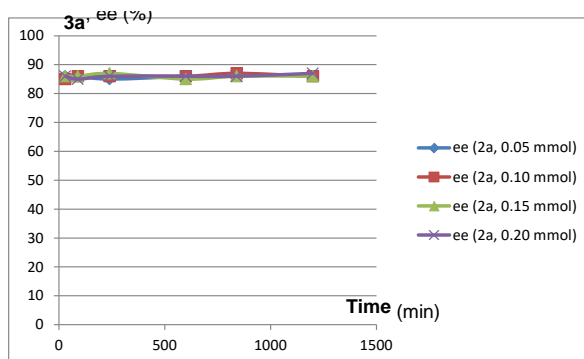

**Figure S1.** The enantioselectivity data of product **3a**

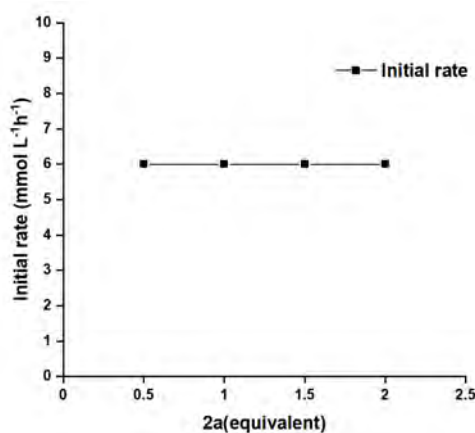

**Figure S2.** Determination of the reaction order of nucleophile

## b. The mechanistic studies of 7a

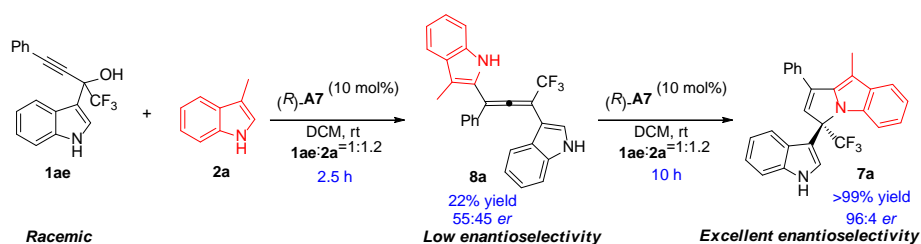

To a solution of  $\alpha$ -indolyl propargylic alcohols **1ae** (0.10 mmol, 1.0 equiv.) and catalyst (*R*)-**A7** (0.01 mmol, 10 mol%) in DCM (1 mL) was added indole **2a** (0.12 mmol, 1.2 equiv.). The mixture was stirred at room temperature for 2.5 h. The crude product was purified directly by flash column chromatography on silica gel (petroleum ether/ ethyl acetate = 20:1~10:1) to give the tetrasubstituted allene product **8a**.

To a solution of tetrasubstituted allene product **8a** (0.05 mmol, 1.0 equiv.) in DCM (1 mL) was added catalyst (*R*)-**A7** (0.005 mmol, 10 mol%). The mixture was stirred at room temperature for 10 h. The crude product was purified directly by flash column chromatography on silica gel (petroleum ether/ ethyl acetate = 20:1~10:1) to give the product **7a** with >99% yield and 96:4 *er*.

3-methyl-2-(4,4,4-trifluoro-3-(1*H*-indol-3-yl)-1-phenylbuta-1,2-dien-1-yl)-1*H*-indole (**8a**)

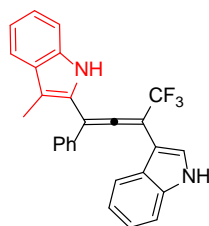

light brown oil, 2.5 h, 22% yield, 55:45 *er*. **<sup>1</sup>H NMR** (500 MHz, CDCl<sub>3</sub>)  $\delta$ : 8.38 (s, 1H), 7.90 (s, 1H), 7.73 (d, *J* = 8.1 Hz, 1H), 7.59 (d, *J* = 7.9 Hz, 1H), 7.55-7.51 (m, 2H), 7.48-7.38 (m, 5H), 7.31 (d, *J* = 8.1 Hz, 1H), 7.22 (dd, *J* = 15.1, 7.5 Hz, 2H), 7.14 (t, *J* = 7.5 Hz, 1H), 7.05 (t, *J* = 7.6 Hz, 1H), 2.21 (s, 3H). **<sup>13</sup>C NMR** (126 MHz, CDCl<sub>3</sub>)  $\delta$ : 206.5, 136.3, 136.0, 134.6, 129.7, 129.2, 128.9, 128.6, 126.0, 125.7, 123.7 (d, *J* = 2.5 Hz), 123.5 (q, *J* = 275.5 Hz), 123.2, 123.0, 121.1, 119.9, 119.7, 119.1, 112.9, 111.6, 110.9, 110.7, 104.4, 99.7 (q, *J* = 35.5 Hz), 9.7. **<sup>19</sup>F NMR** (471 MHz, CDCl<sub>3</sub>)  $\delta$ : -61.44. IR (ATR)  $\nu_{max}$ : 3407, 2954, 1299, 1246, 1187, 735 cm<sup>-1</sup>. **HRMS** (ESI): *m/z* calcd. for C<sub>27</sub>H<sub>19</sub>N<sub>2</sub>F<sub>3</sub> [M-H]<sup>-</sup>: 427.1428; found: 427.1433. **HPLC analysis**: The enantiomeric excess was determined by HPLC with Chiralpak IA column (hexane/*i*-PrOH = 90/10, flow rate 1 mL·min<sup>-1</sup>,  $\lambda$  = 245 nm): *t*<sub>major</sub> = 13.1 min, *t*<sub>minor</sub> = 16.4 min.

To a solution of  $\alpha$ -indolyl propargylic alcohols **1ae** (0.10 mmol, 1.0 equiv.) and catalyst (*R*)-**A7** (0.01 mmol, 10 mol%) in DCM (1 mL) was added indole **2a** (0.12 mmol, 1.2 equiv.). Then 12.3  $\mu$ L PhCF<sub>3</sub> (0.10 mmol) was added as NMR internal standard. The mixture was stirred at room temperature, and the transformation from **1ae** to **7a** was monitored every 2 h by taking an aliquot (0.08 mL) of the reaction mixture by syringe. The aliquot was quenched by Et<sub>3</sub>N (1 drop). Analysis of the crude reaction by quantitative <sup>19</sup>F NMR indicated the formation and the yield of **8a** and **7a**. The product **8a** and **7a** were isolated by preparative thin layer chromatography, the *ee* values of **8a** and **7a** were determined by HPLC.

To explore the origin of the excellent stereocontrol in the formation of chiral cyclic 3,1'-BIMs **7a**, we monitored the changes in both the *ee* values and the yields of **7a** and **8a** during the reaction. Under standard conditions, it was observed that *ee* values of **8a** and **7a** remained at 10% and 93%, respectively (**Fig. S3**),

which excluded the chiral induction from intermediate **8a**.

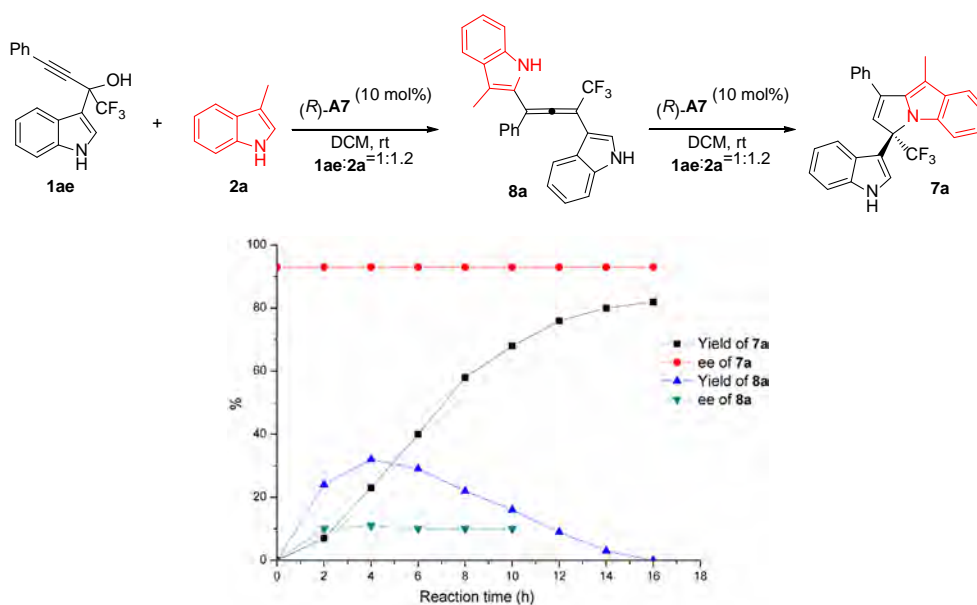

**Figure S3.** The *in-situ* monitoring of the transformation from **1ae** to **7a**.

To a solution of racemic tetrasubstituted allenes **8a** (0.10 mmol, 1.0 equiv.), and catalyst  $(R)\text{-A7}$  (0.01 mmol, 10 mol%) in DCM (1 mL). Then 12.3  $\mu\text{L}$   $\text{PhCF}_3$  (0.10 mmol) was added as NMR internal standard. The mixture was stirred at room temperature and the process of transforming **8a** into **7a** was monitored every 1.5 h by taking an aliquot (0.08 mL) of the reaction mixture by syringe. The aliquot was quenched by  $\text{Et}_3\text{N}$  (1 drop). Analysis of the crude reaction by quantitative  $^{19}\text{F}$  NMR indicated the formation and the yield of **8a** and **7a**. Products **8a** and **7a** were isolated by preparative thin layer chromatography, the ee values of **8a** and **7a** were determined by HPLC.

As shown below, under standard conditions, the intramolecular cyclization of **8a** to **7a** proceeded smoothly with high efficiency and excellent stereoselectivity, implying that **8a** might be an intermediate. The ee value of **8a** remains at 0% during the process, which excluded a dynamic kinetic resolution mechanism (Fig. S4). The high ee of **7a** comes from the influence of chiral phosphoric acid  $(R)\text{-A7}$ .

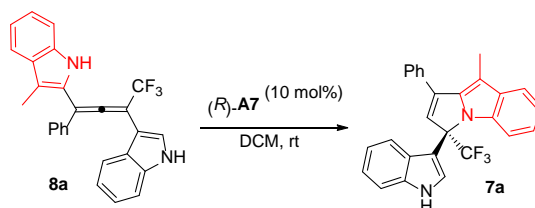

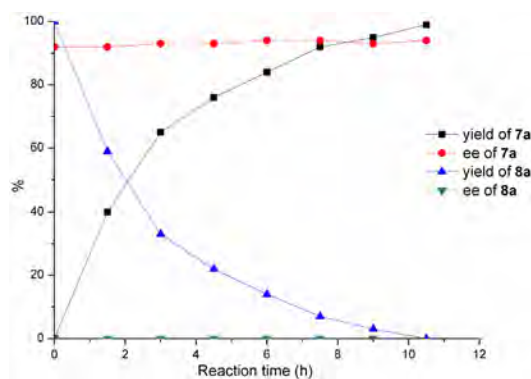

**Figure S4.** The *in-situ* monitoring of the transformation from racemic **8a** to **7a**

To a solution of  $\alpha$ -indolyl propargylic alcohols **1ae'** (0.10 mmol, 1.0 equiv.) and catalyst (*R*)-**A7** (0.01 mmol, 10 mol%) in DCM (1 mL) was added indole **2a** (0.12 mmol, 1.2 equiv.). The mixture was stirred at room temperature for 14 h. The crude product was purified directly by flash column chromatography on silica gel (petroleum ether/ ethyl acetate = 20:1~10:1) to give product **7a'** with 70% yield and 92:8 *er* (**Fig. S5**).

When *N*-methyl protected  $\alpha$ -indolyl propargylic alcohol **1ae'** was subjected to the standard conditions, the desired product **7a'** could be obtained with slightly lower yield and *er*. This result implied that the free N-H group of  $\alpha$ -indolyl propargylic alcohol might also participate in the chiral control, *via* hydrogen bond or ion-pair interaction with chiral phosphoric acid.

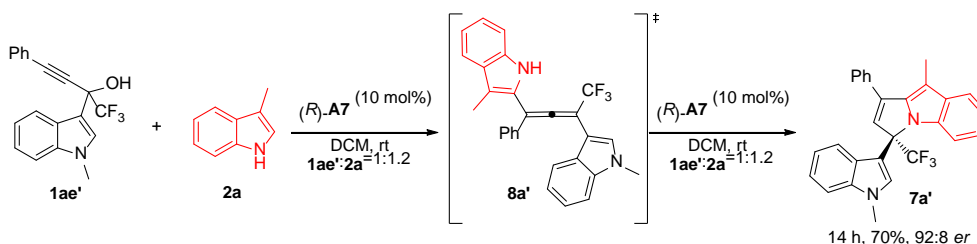

**Figure S5.** Control experiment of *N*-methylated  $\alpha$ -indolyl propargylic alcohol

(*R*)-9-methyl-3-(1-methyl-1*H*-indol-3-yl)-1-phenyl-3-(trifluoromethyl)-3*H*-pyrrolo[1,2-*a*]indole (**7a'**)  
 colorless oil, 14 h, 70% yield, 92:8 *er*,  $[\alpha]_D^{20} = +234.21$  ( $c = 0.28$ , MeOH). **<sup>1</sup>H NMR** (500 MHz, CDCl<sub>3</sub>)  $\delta$ : 7.66 (d,  $J = 7.2$  Hz, 2H), 7.60 (d,  $J = 6.9$  Hz, 1H), 7.50-7.41 (m, 3H), 7.34 (s, 1H), 7.30-7.22 (m, 1H), 7.17-7.09 (m, 2H), 7.09-7.00 (m, 2H), 6.87 (t,  $J = 7.6$  Hz, 1H), 6.77 (d,  $J = 8.1$  Hz, 1H), 6.39 (s, 1H), 3.80 (s, 3H), 2.39 (s, 3H). **<sup>13</sup>C NMR** (126 MHz, CDCl<sub>3</sub>)  $\delta$ : 140.9, 140.9, 137.2, 134.8, 134.0, 133.1, 129.6, 129.0, 128.6, 128.3, 128.1, 128.1, 126.0, 125.5 (d,  $J = 286.2$  Hz), 122.9, 122.3, 120.2, 120.0, 119.7, 119.4, 110.9, 110.7, 109.6, 106.2, 105.1, 70.4 (q,  $J = 31.4$  Hz), 33.2, 9.6. **<sup>19</sup>F NMR** (471 MHz, CDCl<sub>3</sub>)  $\delta$ : -72.27 (s). IR (ATR)  $\nu_{max}$ : 1727, 1433, 1354, 1437, 1131, 1098, 740 cm<sup>-1</sup>. **HRMS** (ESI):  $m/z$  calcd. for C<sub>28</sub>H<sub>21</sub>N<sub>2</sub>F<sub>3</sub> [M+H]<sup>+</sup>: 443.1730; found: 443.1733. **HPLC analysis**: The enantiomeric excess was determined by HPLC with Chiralcel OD-H column (hexane/*i*-PrOH = 99/1, flow rate 0.8 mL·min<sup>-1</sup>,  $\lambda = 280$  nm):  $t_{major} = 8.5$  min,  $t_{minor} = 9.0$  min.

Based on the above experimental results, we proposed a possible reaction mechanism for this catalytic asymmetric cyclization as shown in **Fig. S6**. Firstly, the *in-situ* dehydration of  $\alpha$ -indolyl propargylic alcohol generates resonance structures **IM-1**–**IM-3** with the help of chiral phosphoric acid (*R*)-**A7**. (*R*)-**A7** serves as a bifunctional catalyst, both stabilizes these resonance structures and activates substrate **2a** via hydrogen bond or ion-pair interaction (**IM-4**), and helps to generate chiral tetrasubstituted allene **8a** with low enantioselectivity. Subsequently, allene **8a** is protonated to generate the indolyl benzylic cation, and (*R*)-**A7** exerts efficient chiral

induction through ion-pair and hydrogen-bonding with the corresponding carbocation and the N–H moiety on indole rings (**IM-5**), and delivers the cyclization product **7a** with excellent enantioselectivity.

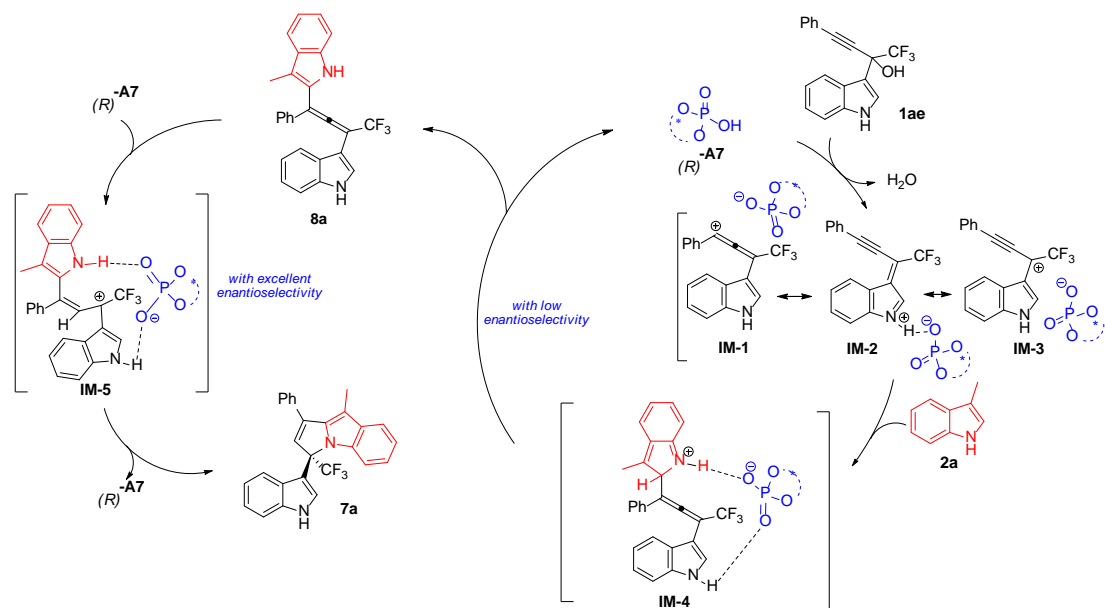

**Figure S6.** Plausible reaction mechanism



## 8. Copies of NMR Spectra

### <sup>1</sup>H NMR of compound 1a (in DMSO-d<sub>6</sub>)

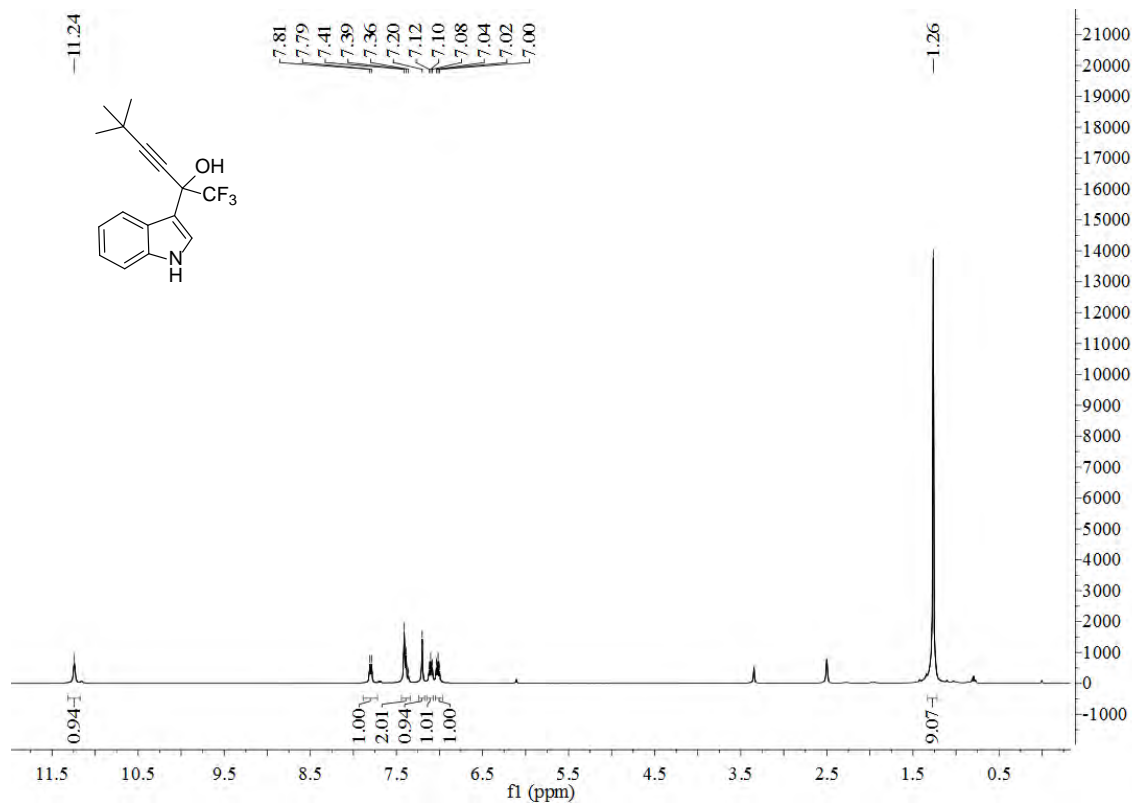

### <sup>13</sup>C NMR of compound 1a (in DMSO-d<sub>6</sub>)

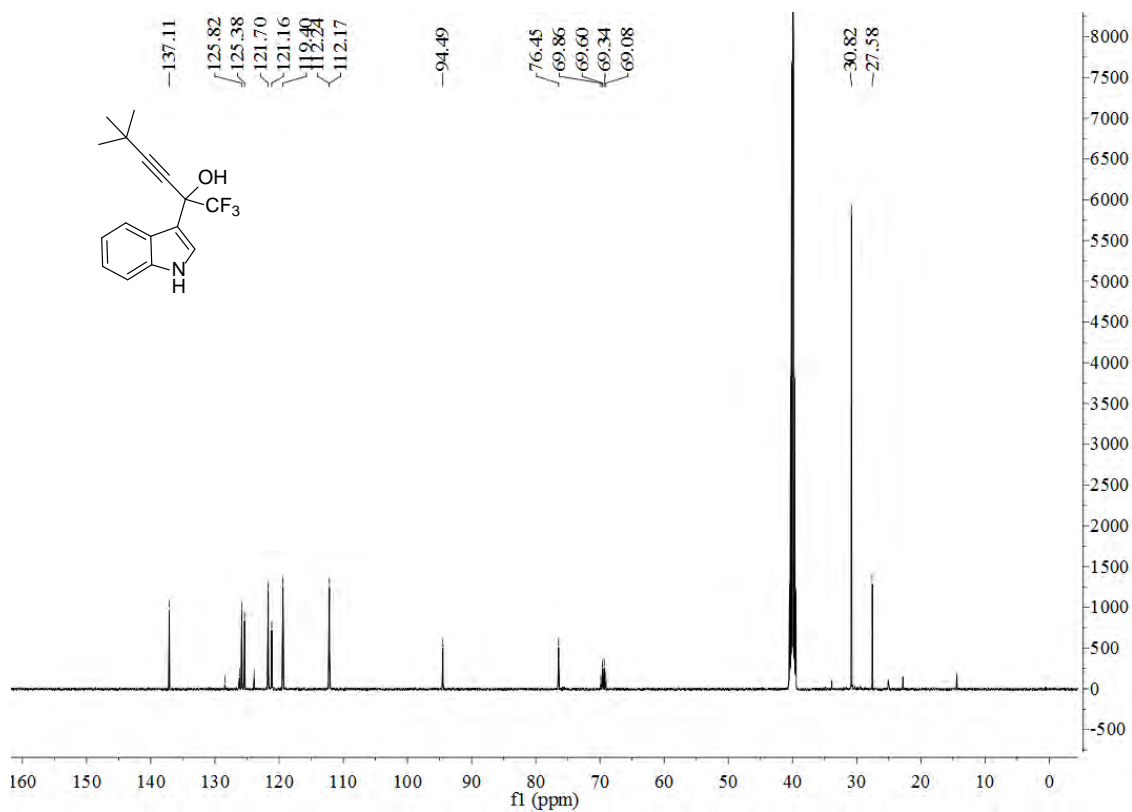

**<sup>19</sup>F NMR of compound 1a (in DMSO-d<sub>6</sub>)**

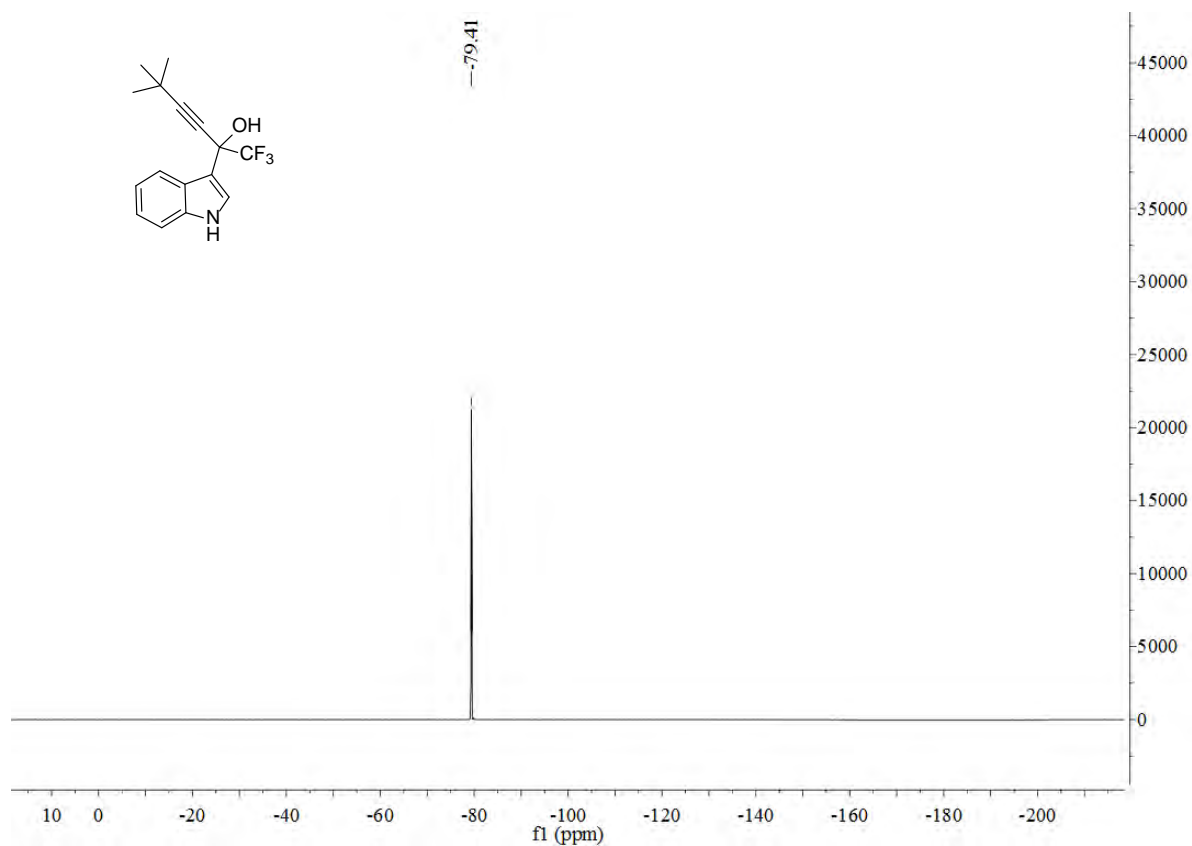

**<sup>1</sup>H NMR of compound 1b (in DMSO-d<sub>6</sub>)**

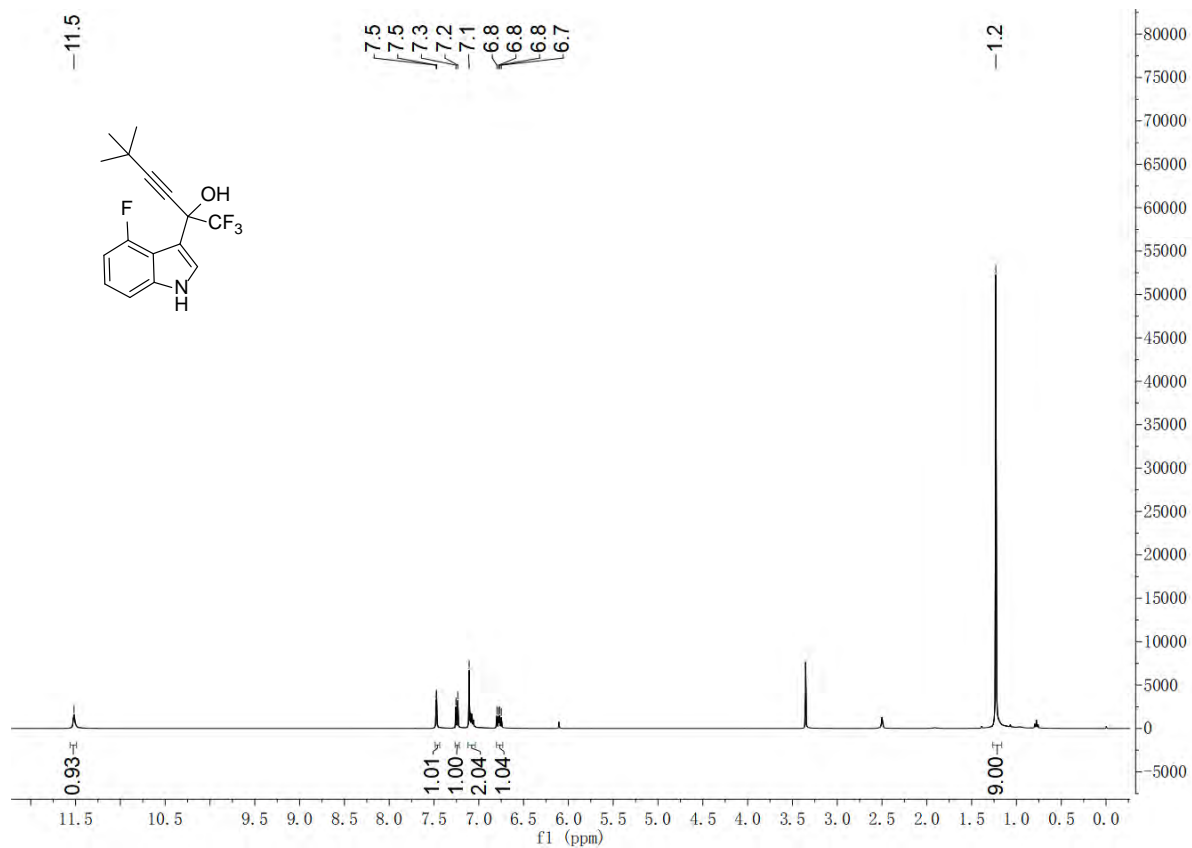

### <sup>13</sup>C NMR of compound 1b (in DMSO-d<sub>6</sub>)

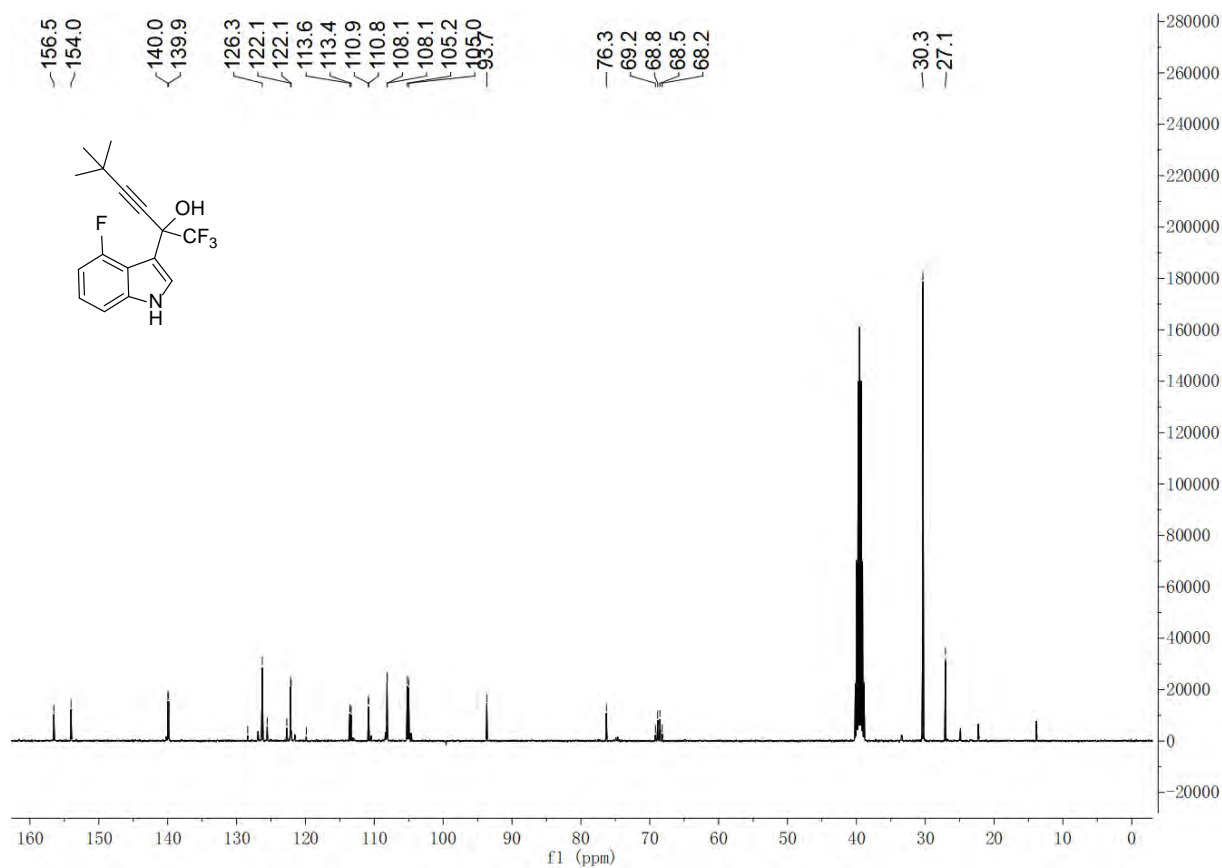

### <sup>19</sup>F NMR of compound 1b (in DMSO-d<sub>6</sub>)

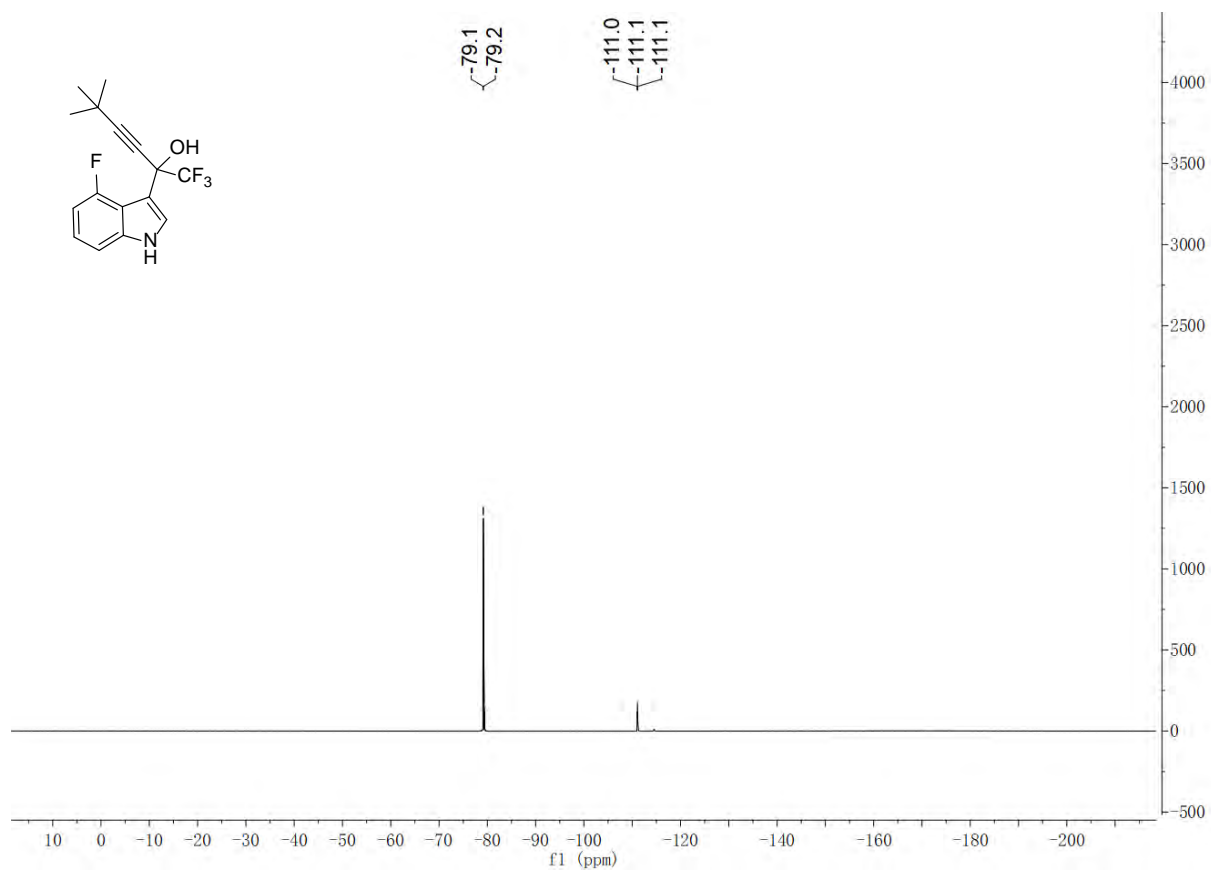

### <sup>1</sup>H NMR of compound 1c (in CDCl<sub>3</sub>)

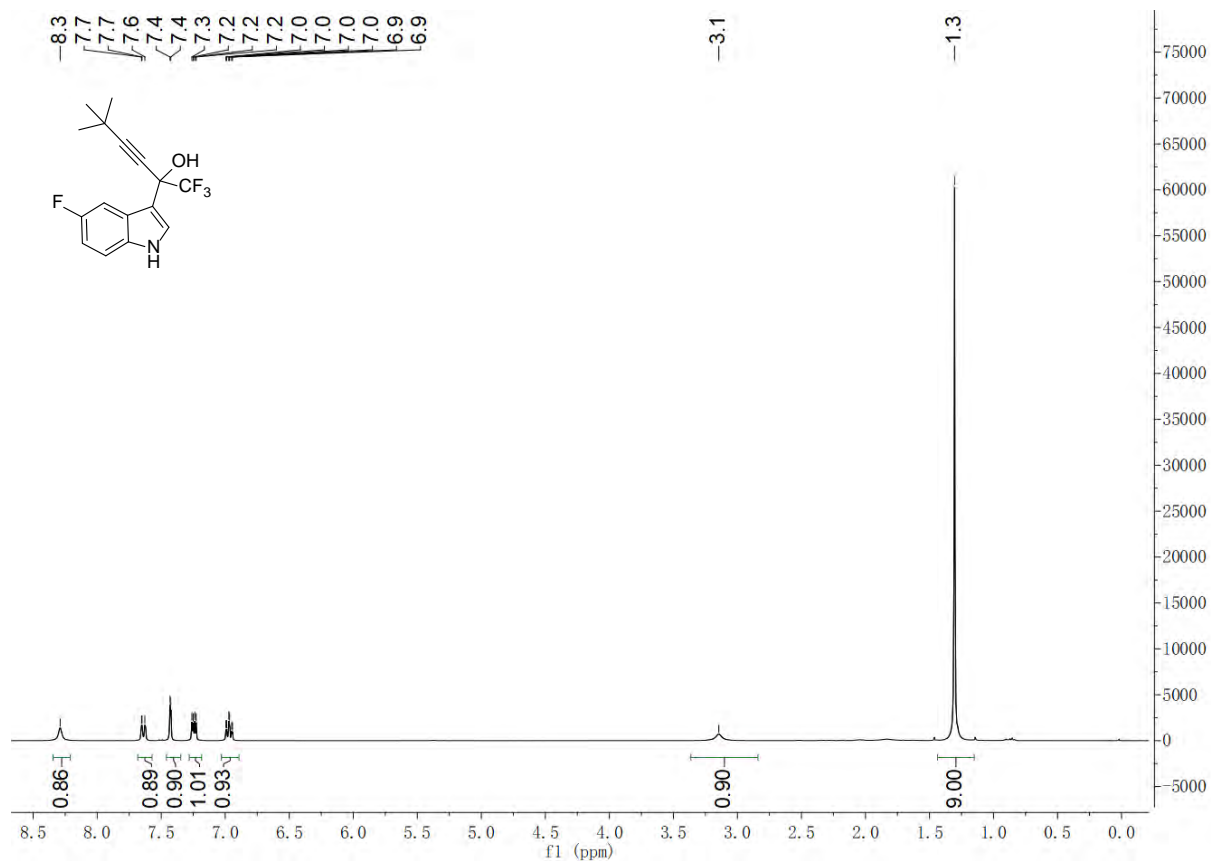

### <sup>13</sup>C NMR of compound 1c (in CDCl<sub>3</sub>)

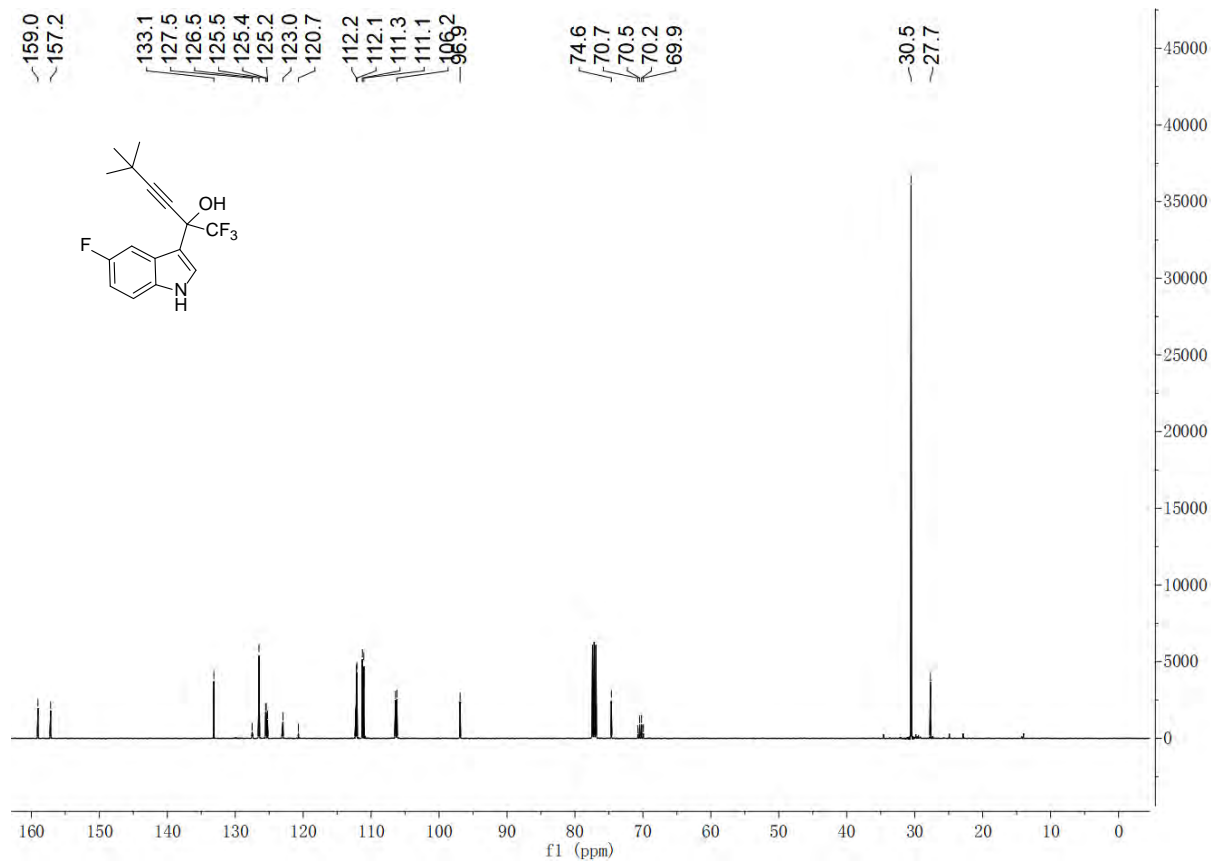

### <sup>19</sup>F NMR of compound 1c (in CDCl<sub>3</sub>)

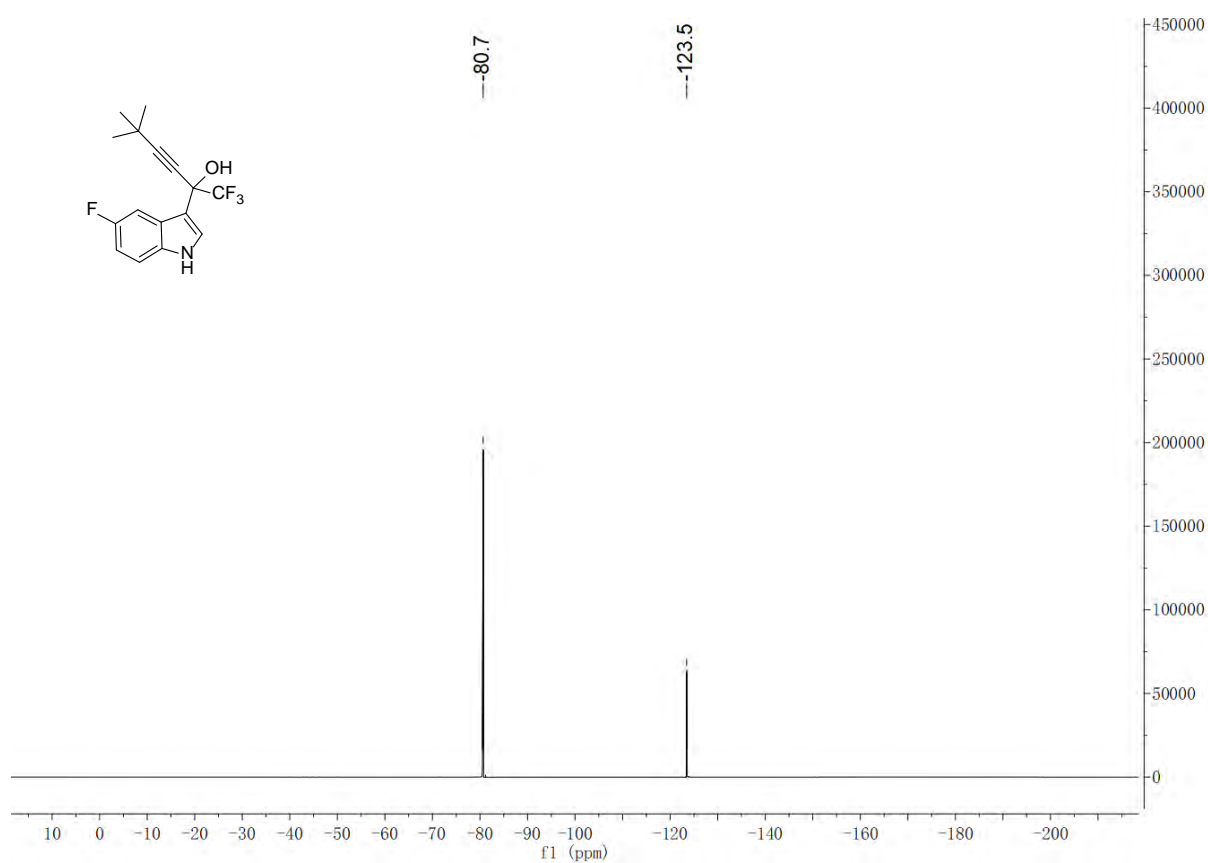

### <sup>1</sup>H NMR of compound 1d (in DMSO-d<sub>6</sub>)

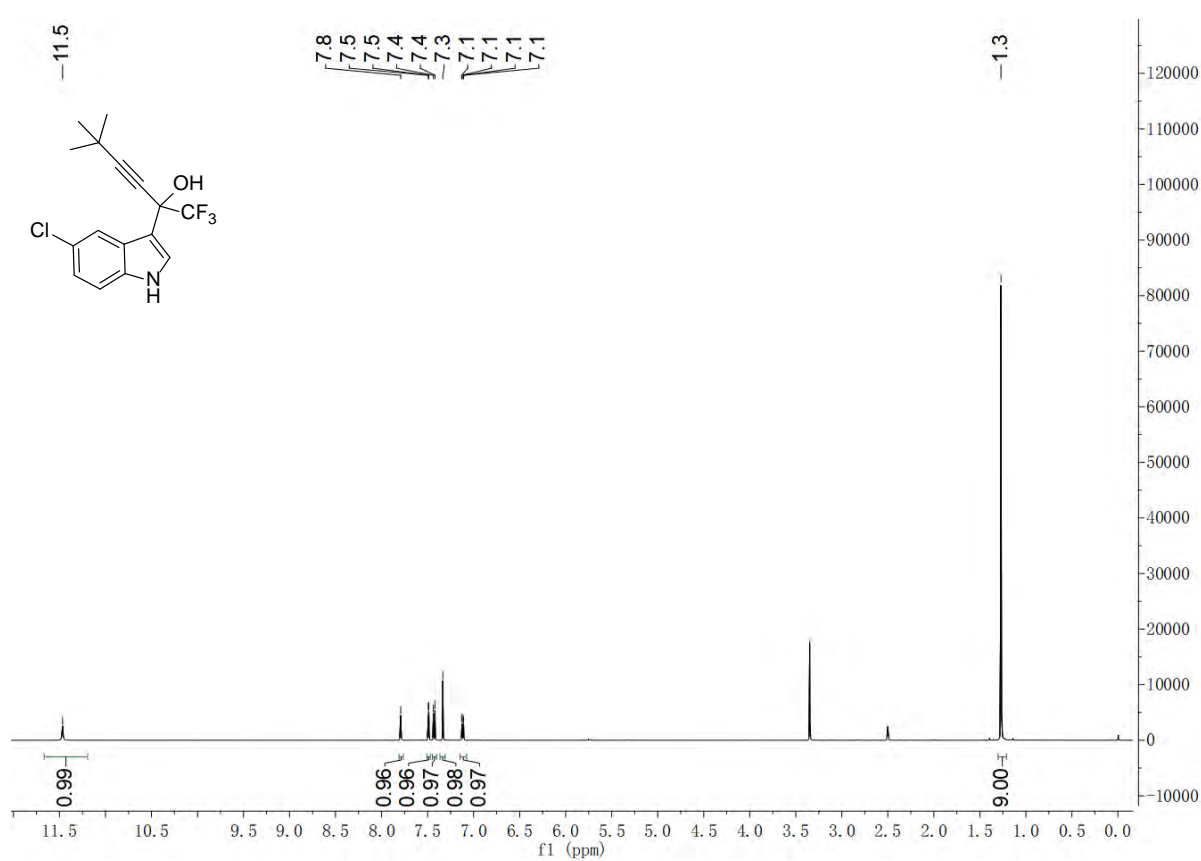

### <sup>13</sup>C NMR of compound 1d (in DMSO-d<sub>6</sub>)

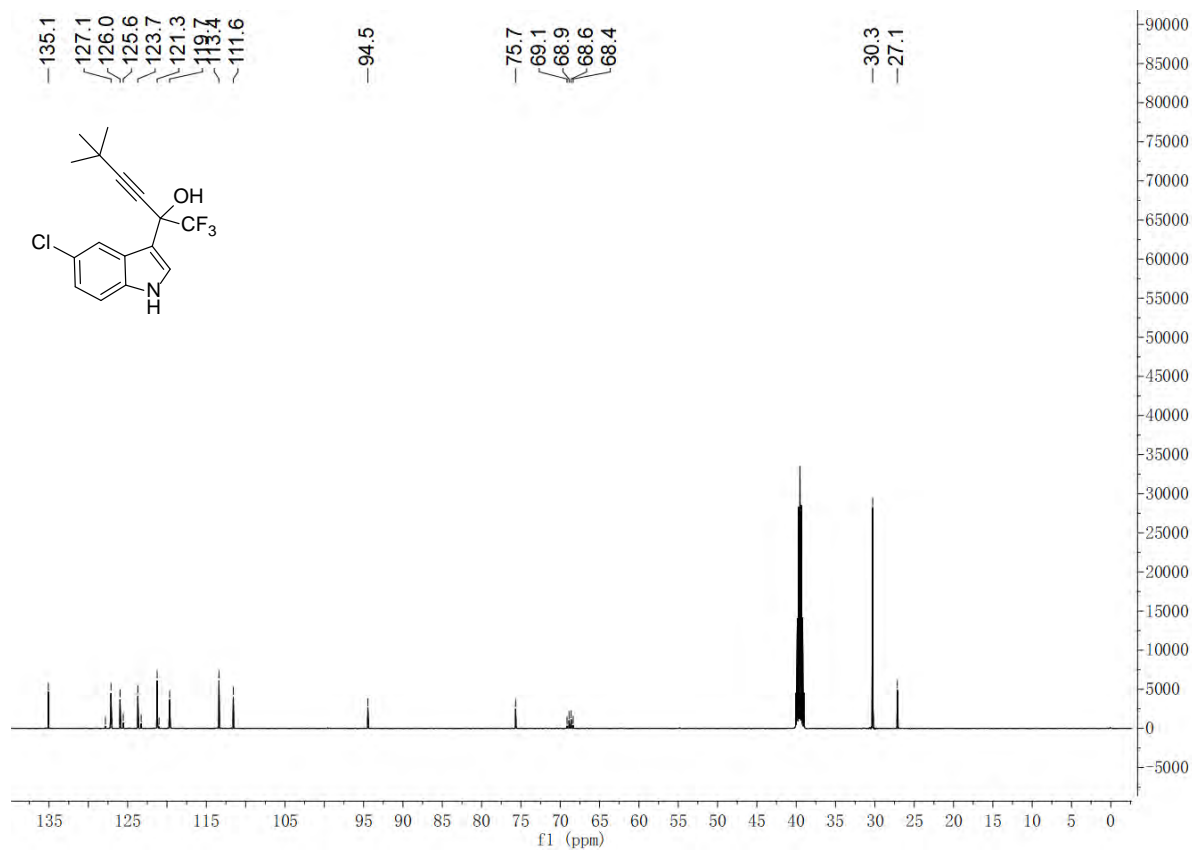

### <sup>19</sup>F NMR of compound 1d (in DMSO-d<sub>6</sub>)

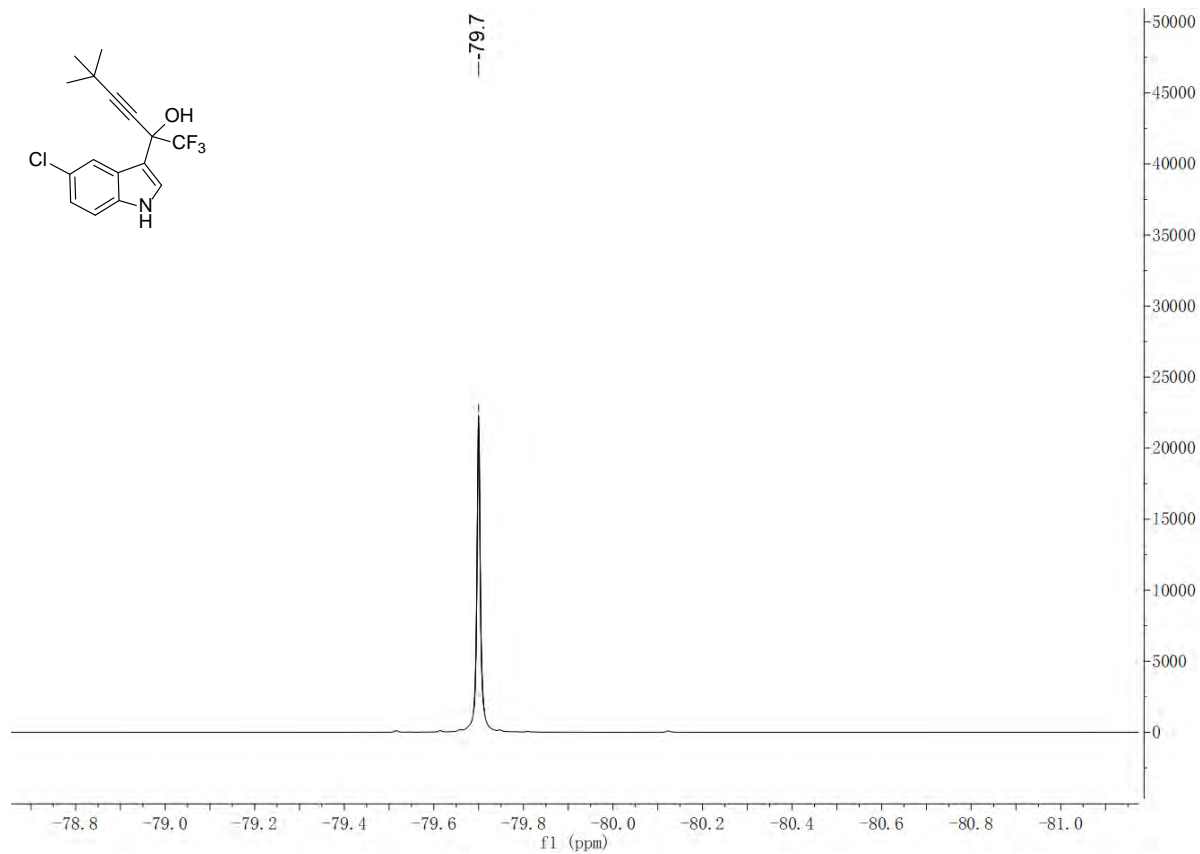

### <sup>1</sup>H NMR of compound 1e (in CDCl<sub>3</sub>)

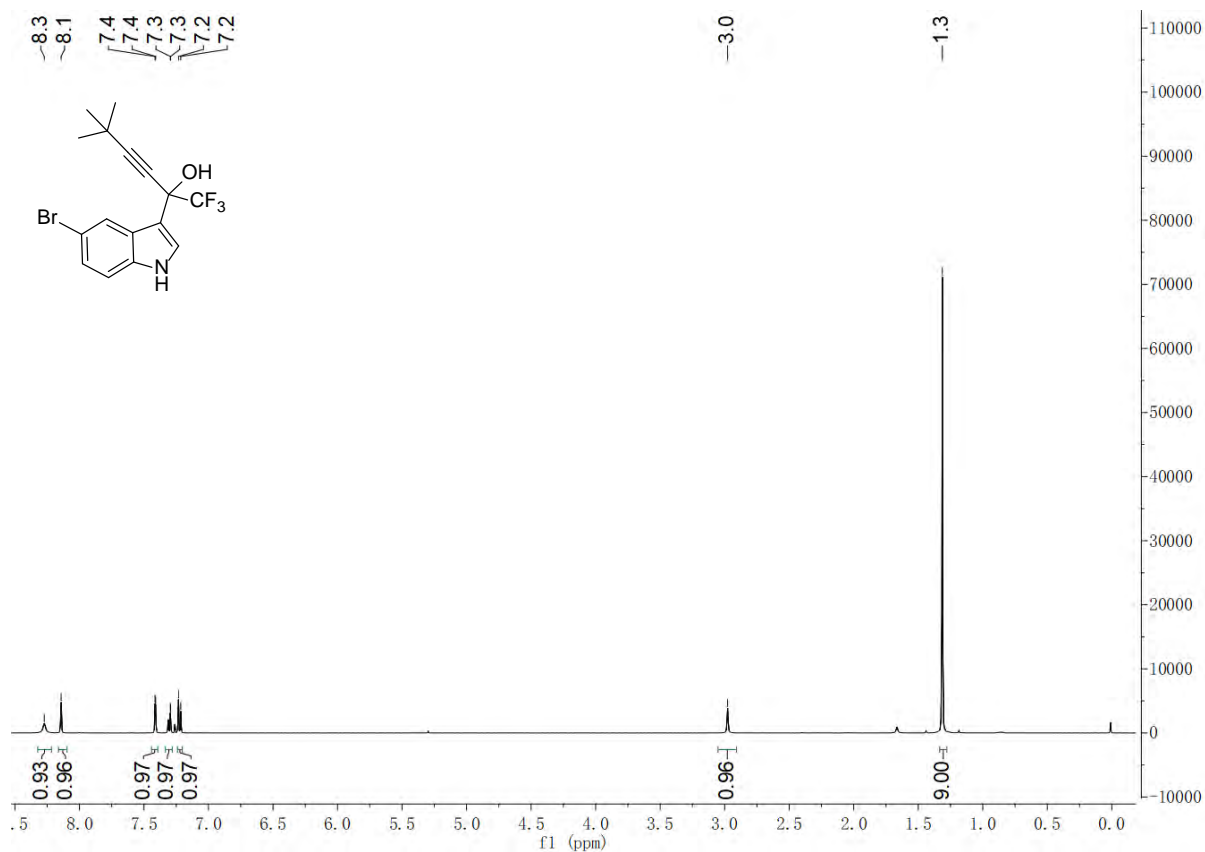

### <sup>13</sup>C NMR of compound 1e (in CDCl<sub>3</sub>)

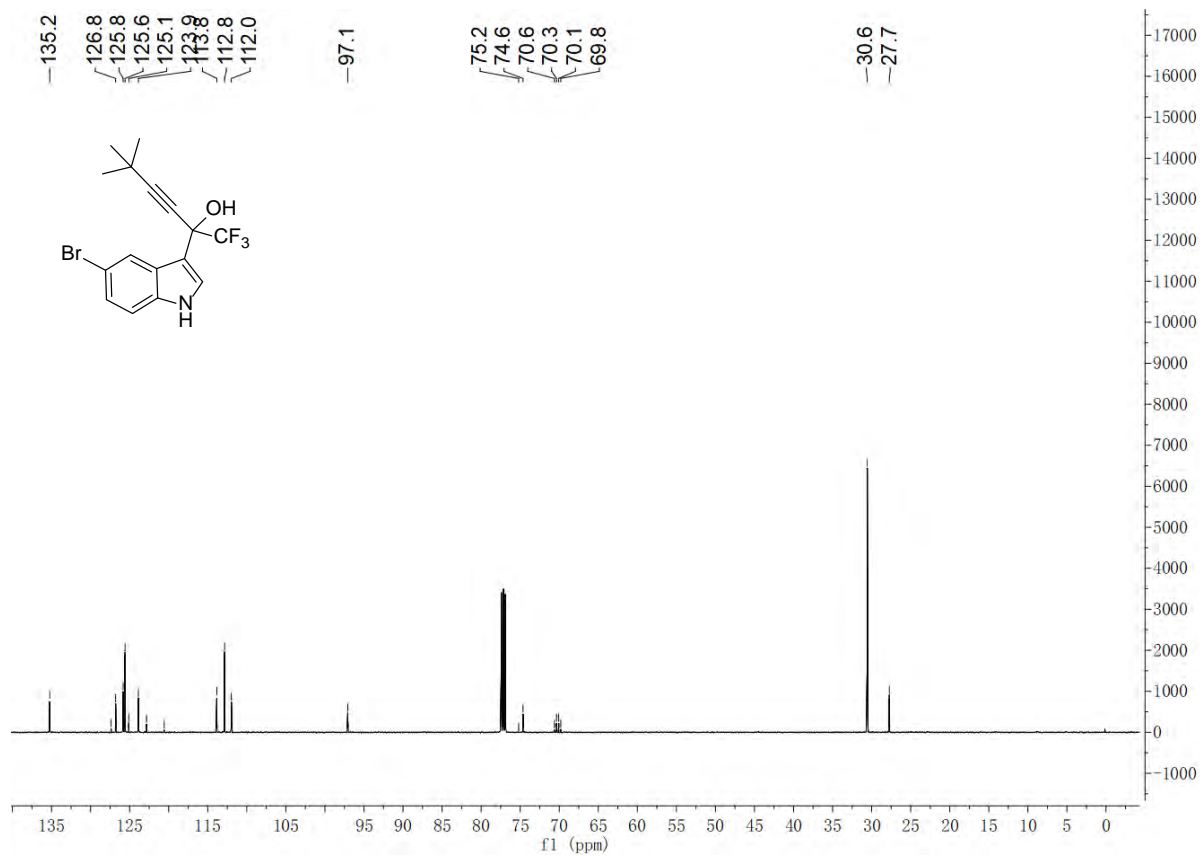

### <sup>19</sup>F NMR of compound 1e (in CDCl<sub>3</sub>)

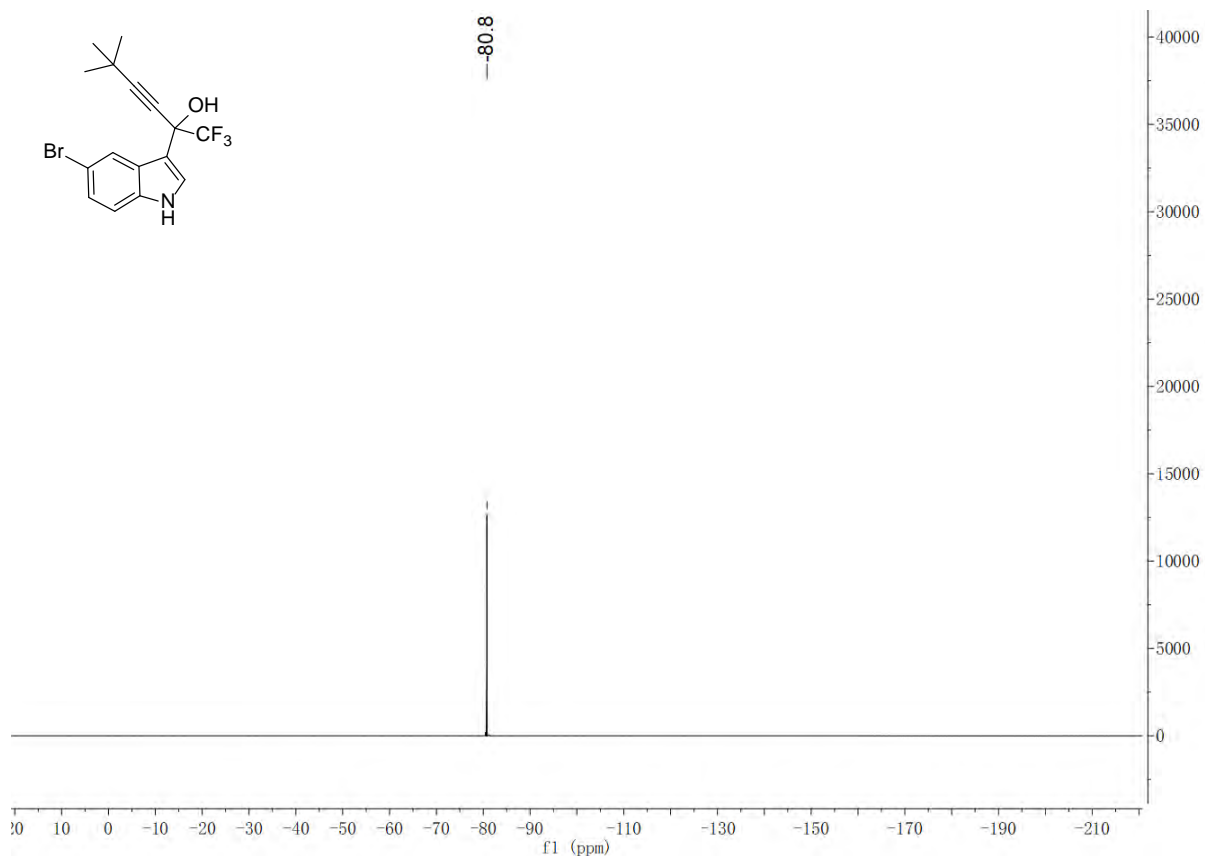

### <sup>1</sup>H NMR of compound 1f (in CDCl<sub>3</sub>)

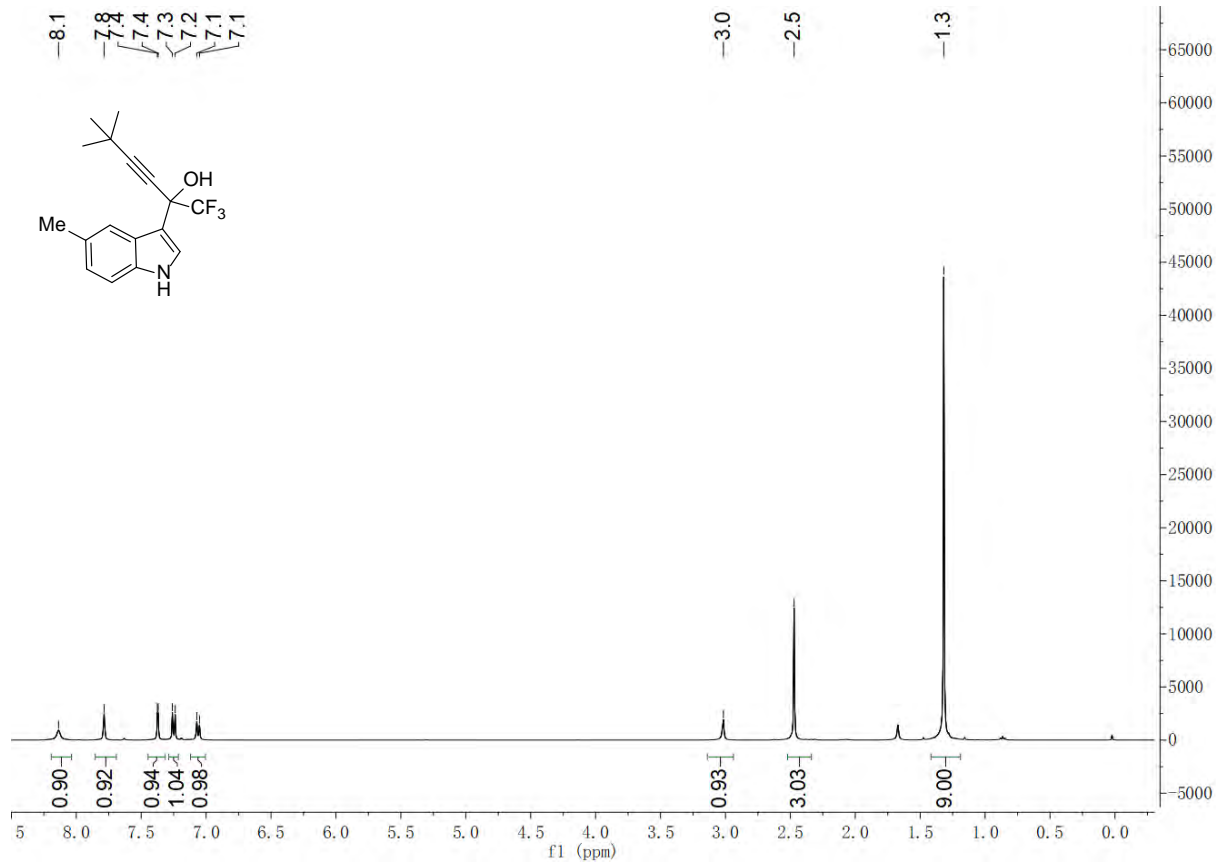



### <sup>13</sup>C NMR of compound 1f (in CDCl<sub>3</sub>)

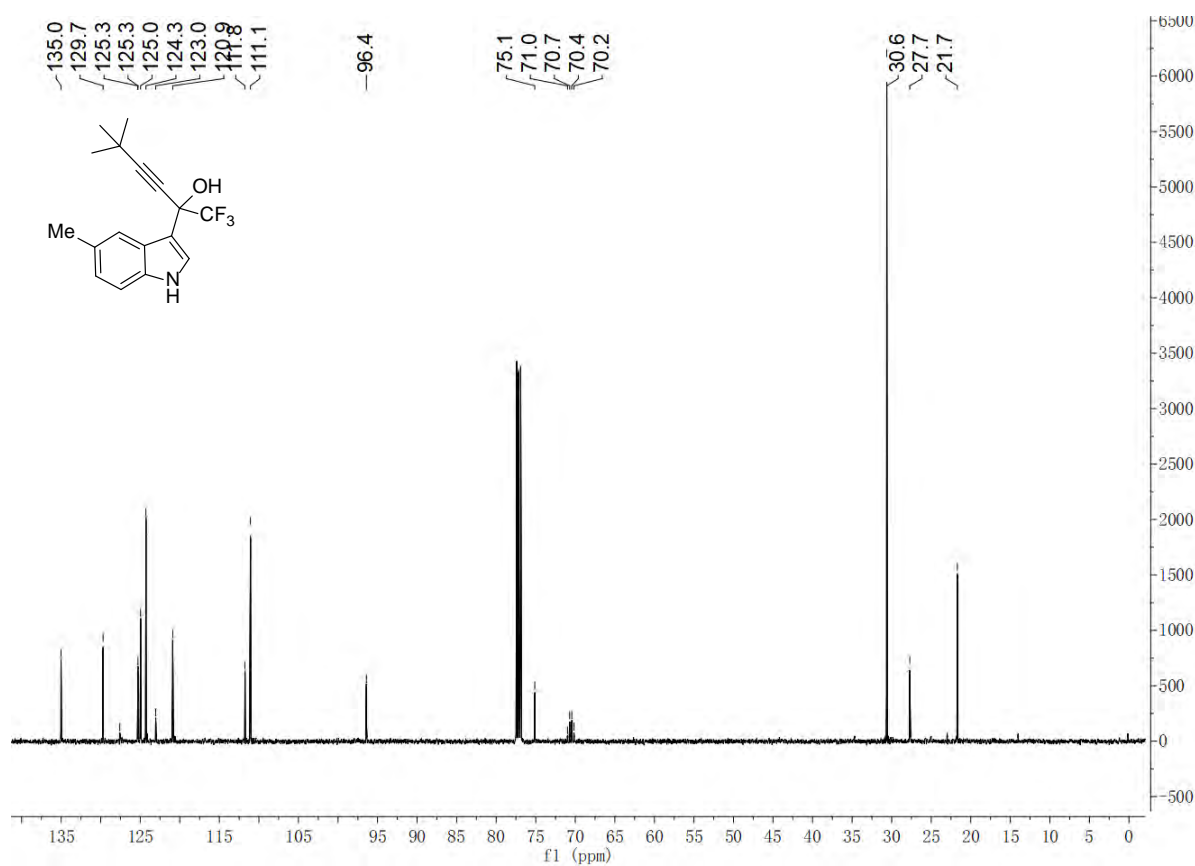

### <sup>19</sup>F NMR of compound 1f (in CDCl<sub>3</sub>)

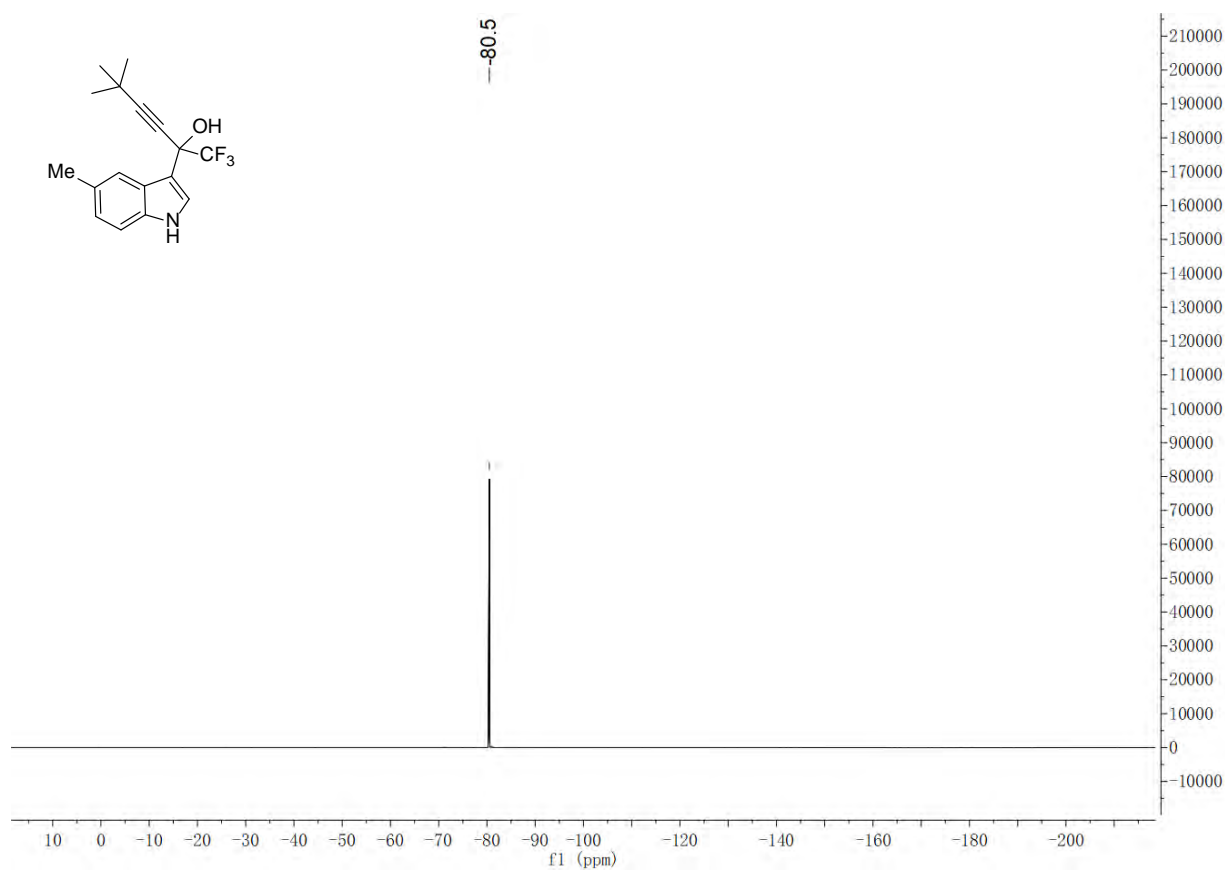

### <sup>1</sup>H NMR of compound 1g (in DMSO-d<sub>6</sub>)

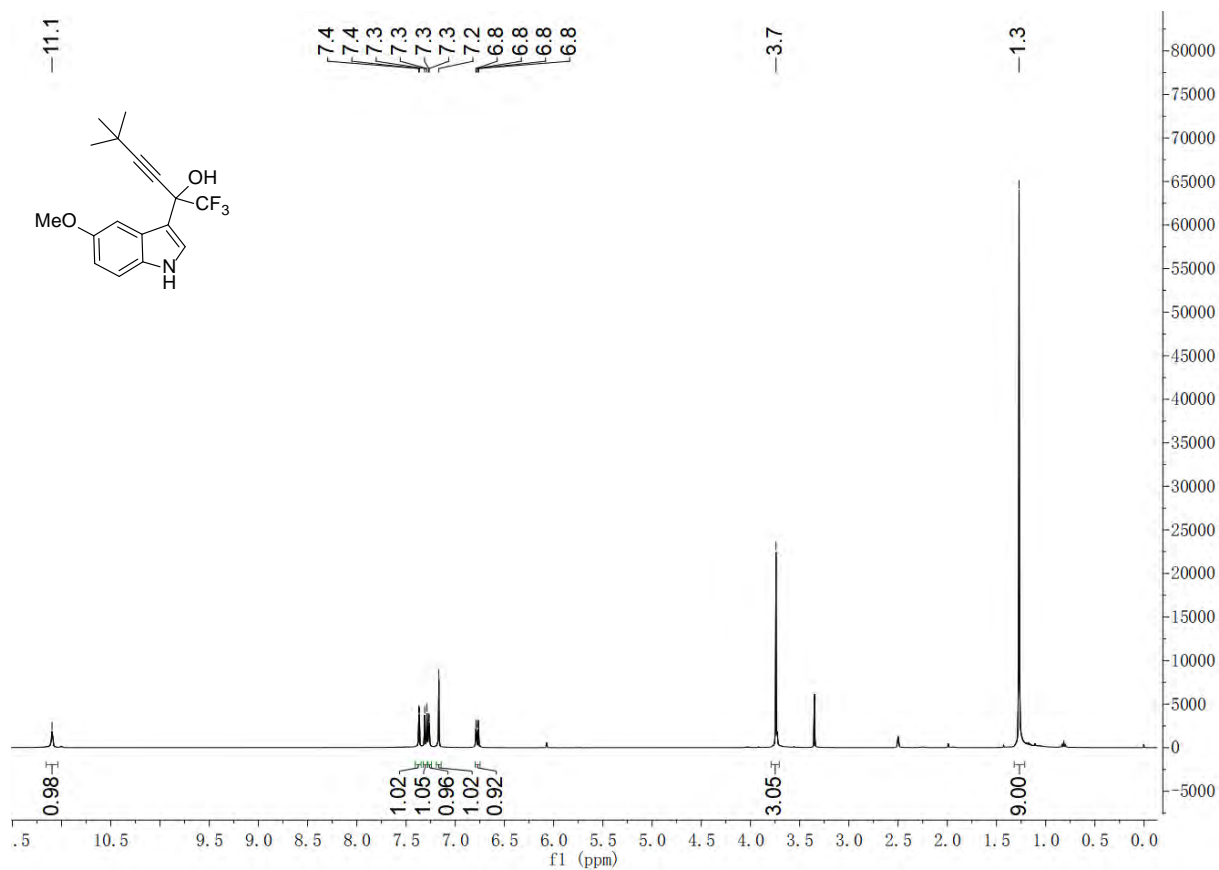

### <sup>13</sup>C NMR of compound 1g (in DMSO-d<sub>6</sub>)

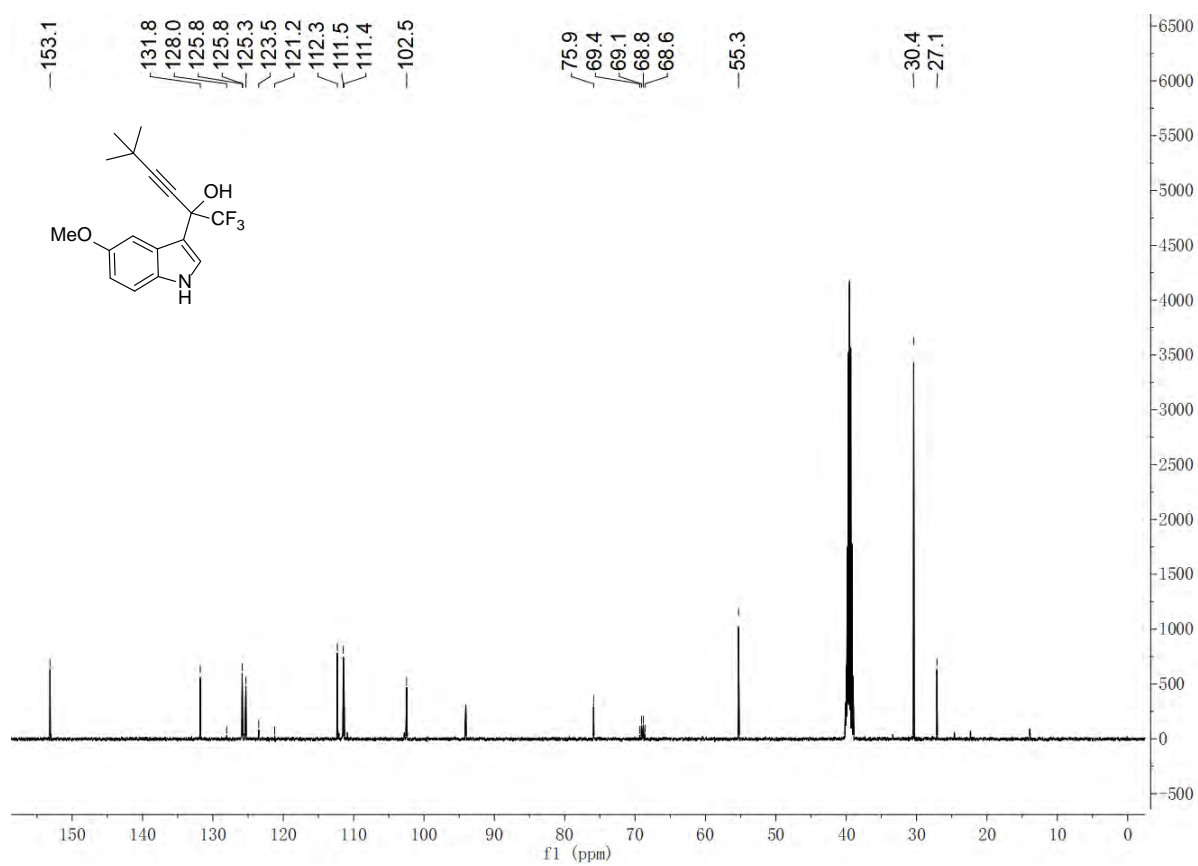

**<sup>19</sup>F NMR of compound 1g (in DMSO-d<sub>6</sub>)**

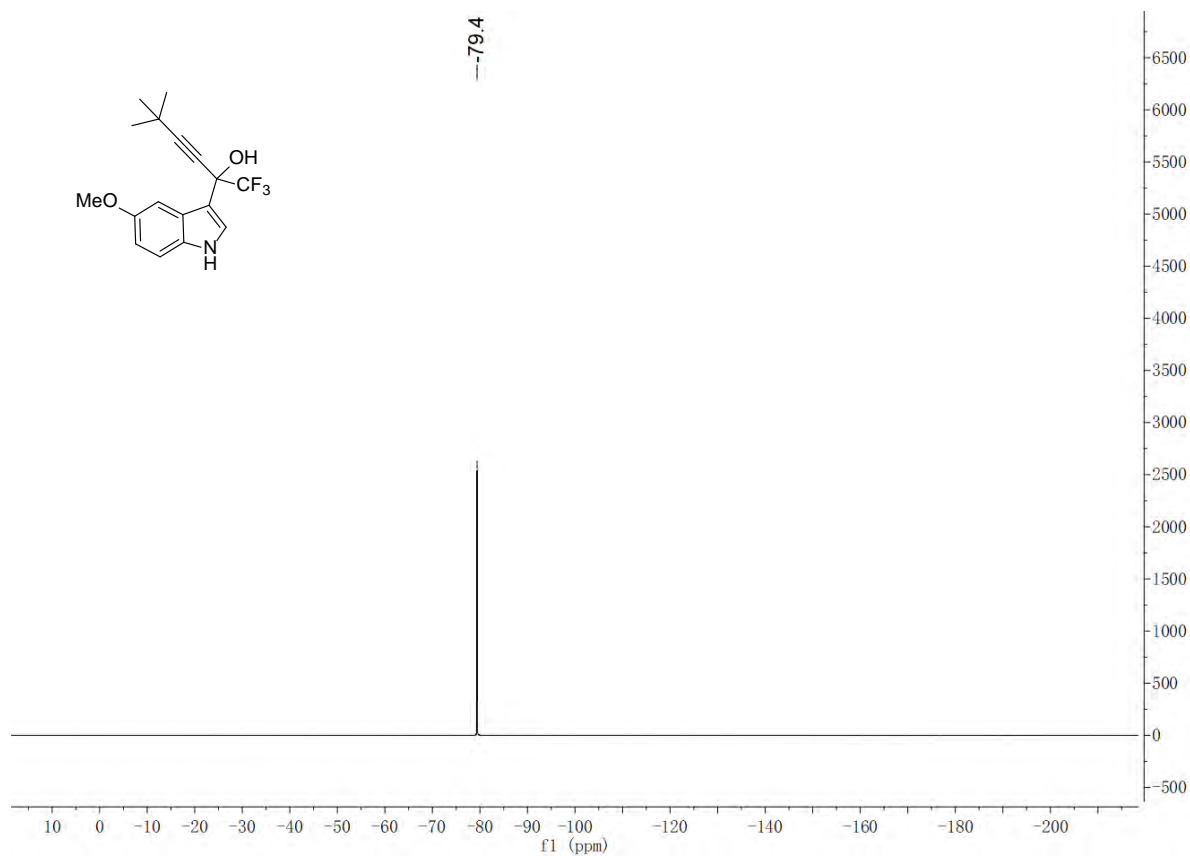

**<sup>1</sup>H NMR of compound 1h (in CDCl<sub>3</sub>)**

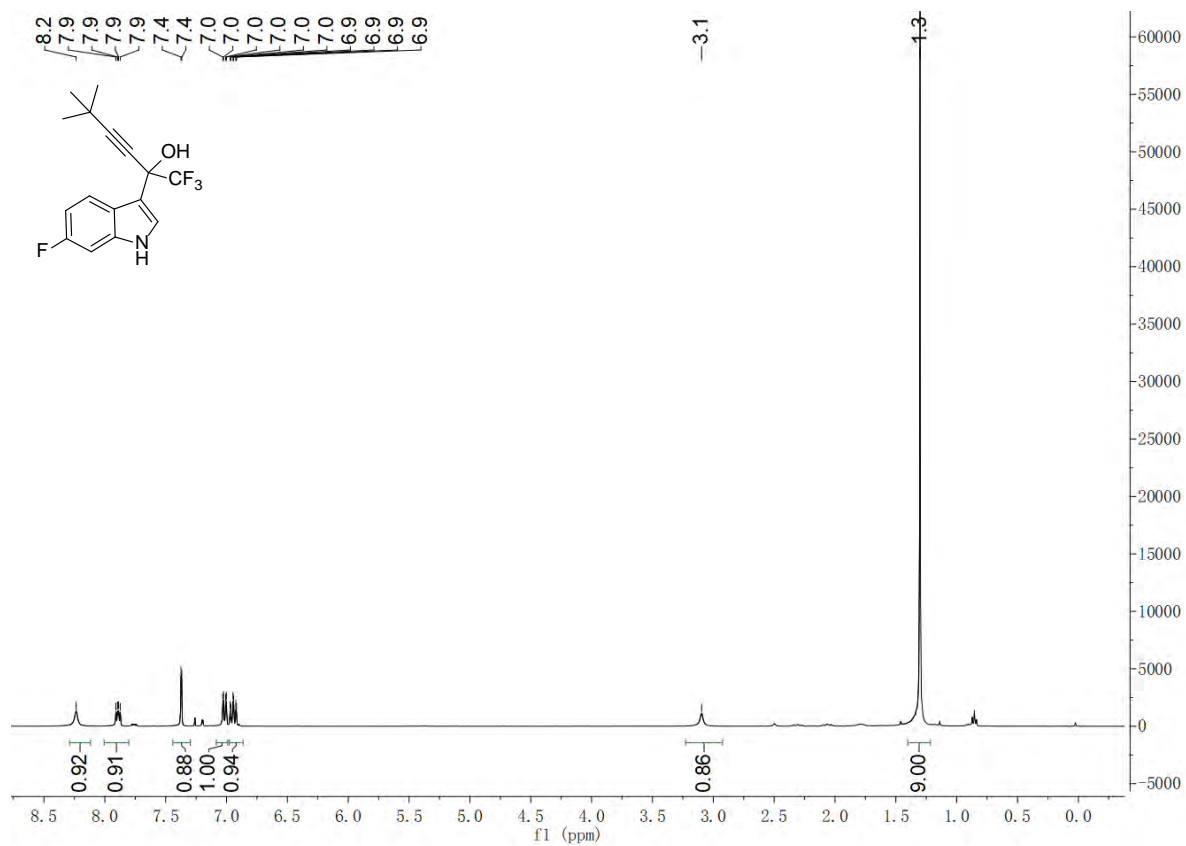

### <sup>13</sup>C NMR of compound 1h (in CDCl<sub>3</sub>)

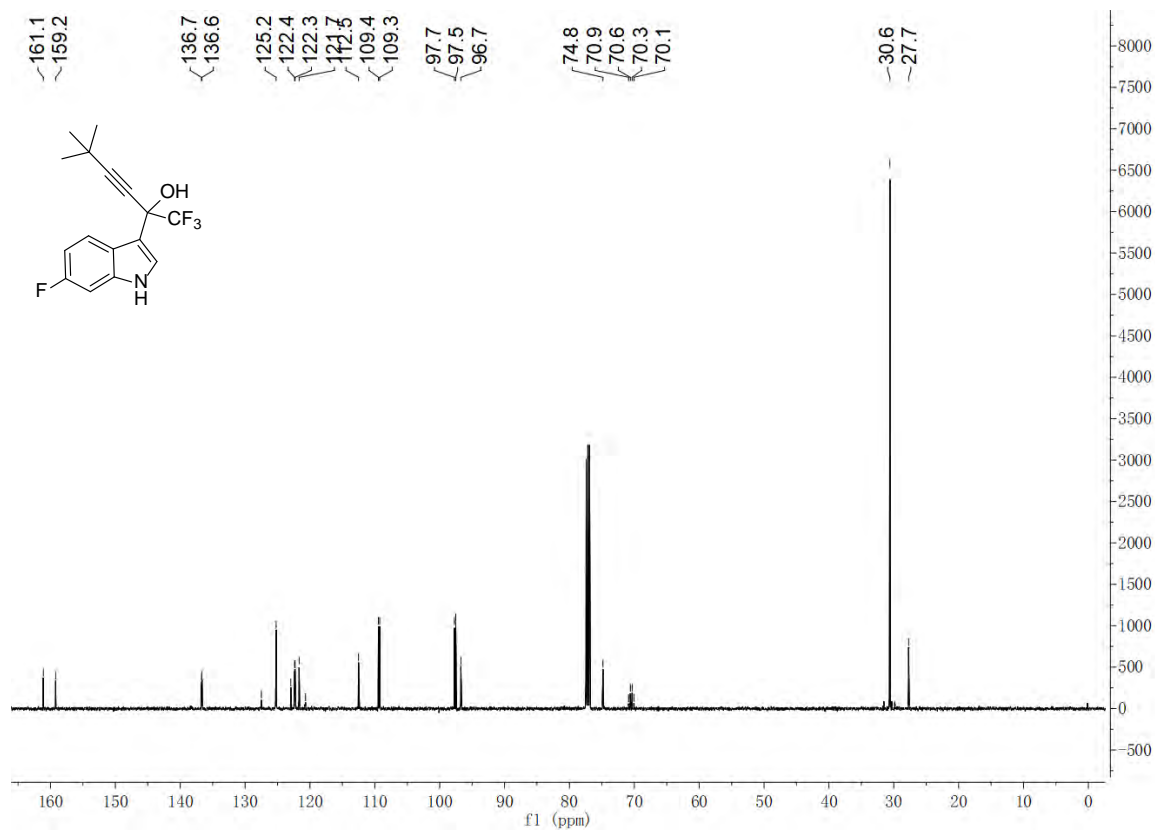

### <sup>19</sup>F NMR of compound 1h (in CDCl<sub>3</sub>)

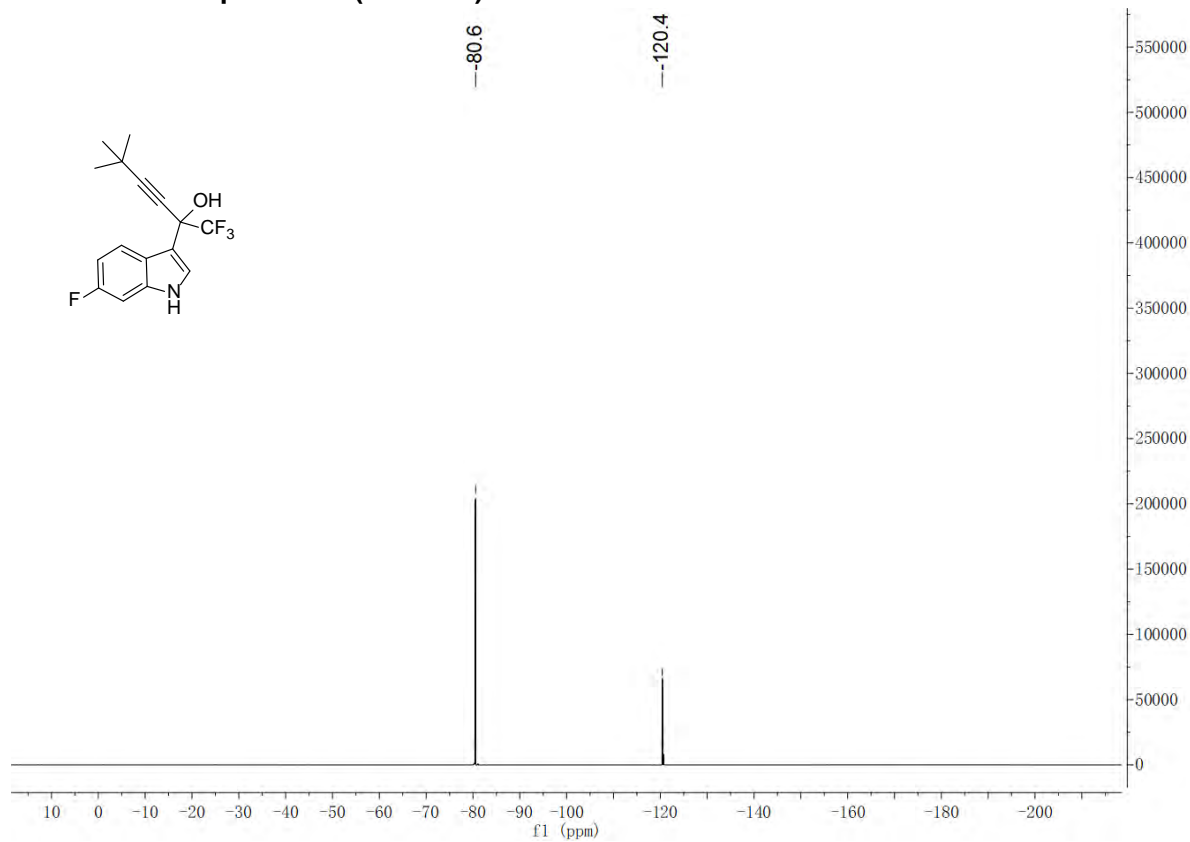

### <sup>1</sup>H NMR of compound 1i (in CDCl<sub>3</sub>)

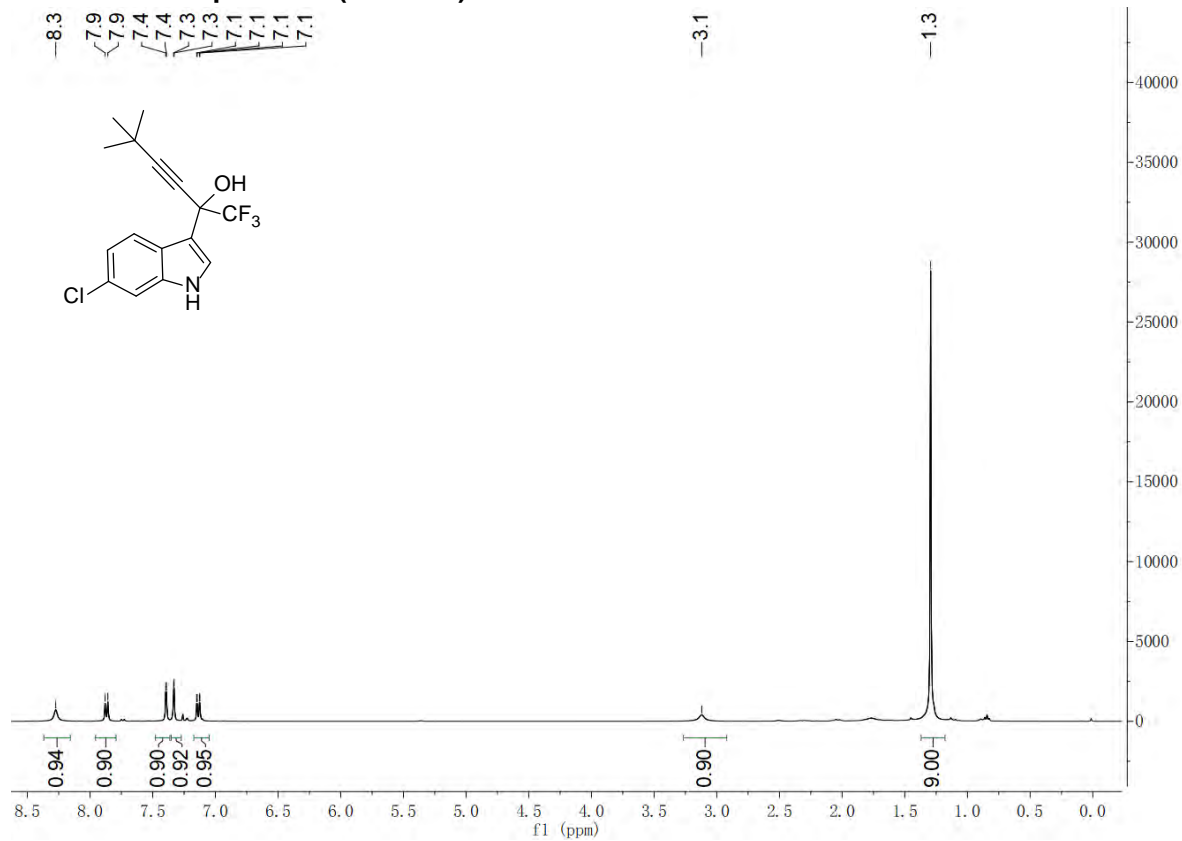

### <sup>13</sup>C NMR of compound 1i (in CDCl<sub>3</sub>)

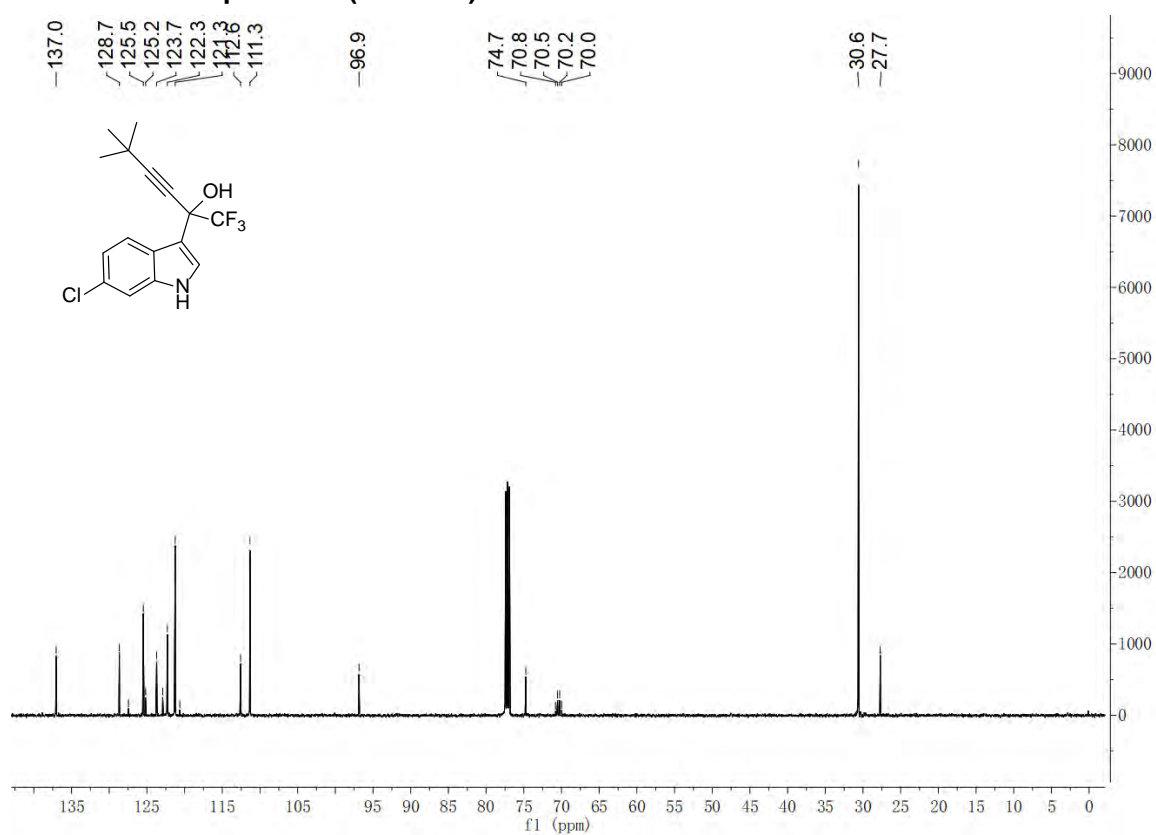

**<sup>19</sup>F NMR of compound 1i (in CDCl<sub>3</sub>)**

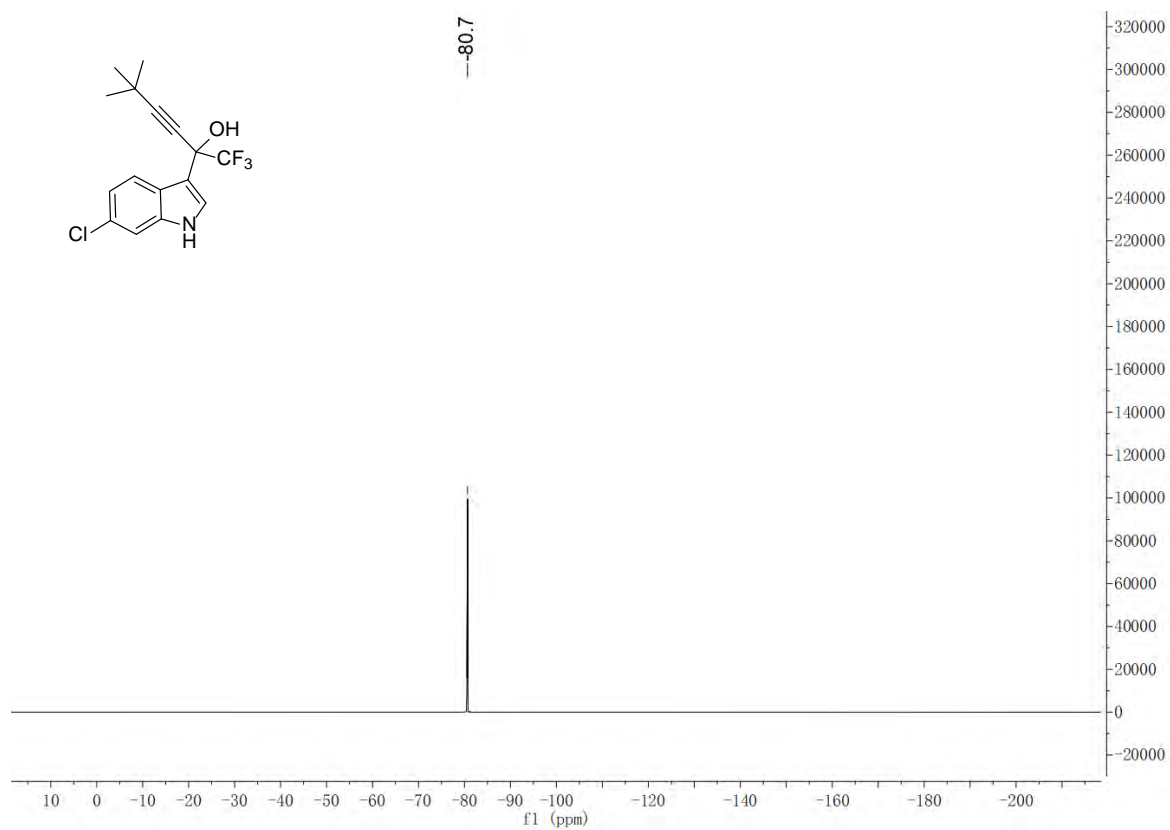

**<sup>1</sup>H NMR of compound 1j (in CDCl<sub>3</sub>)**

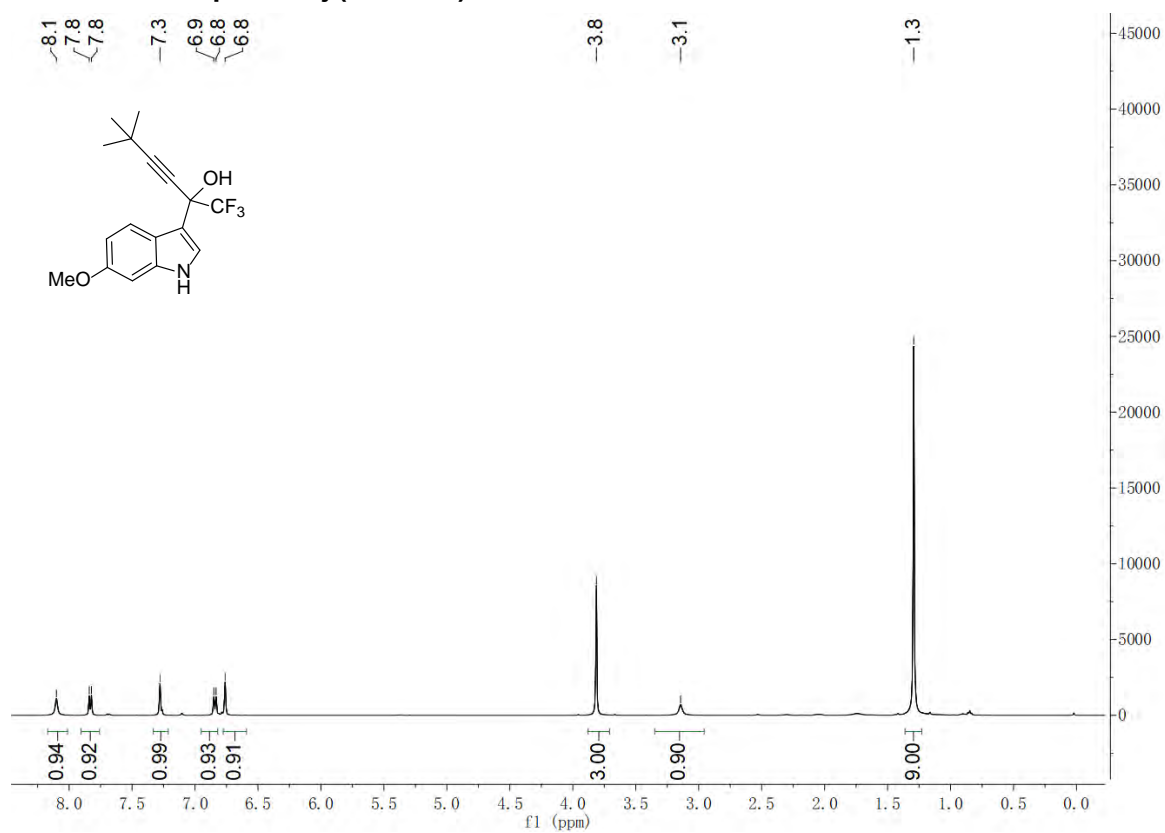

### <sup>13</sup>C NMR of compound 1j (in CDCl<sub>3</sub>)

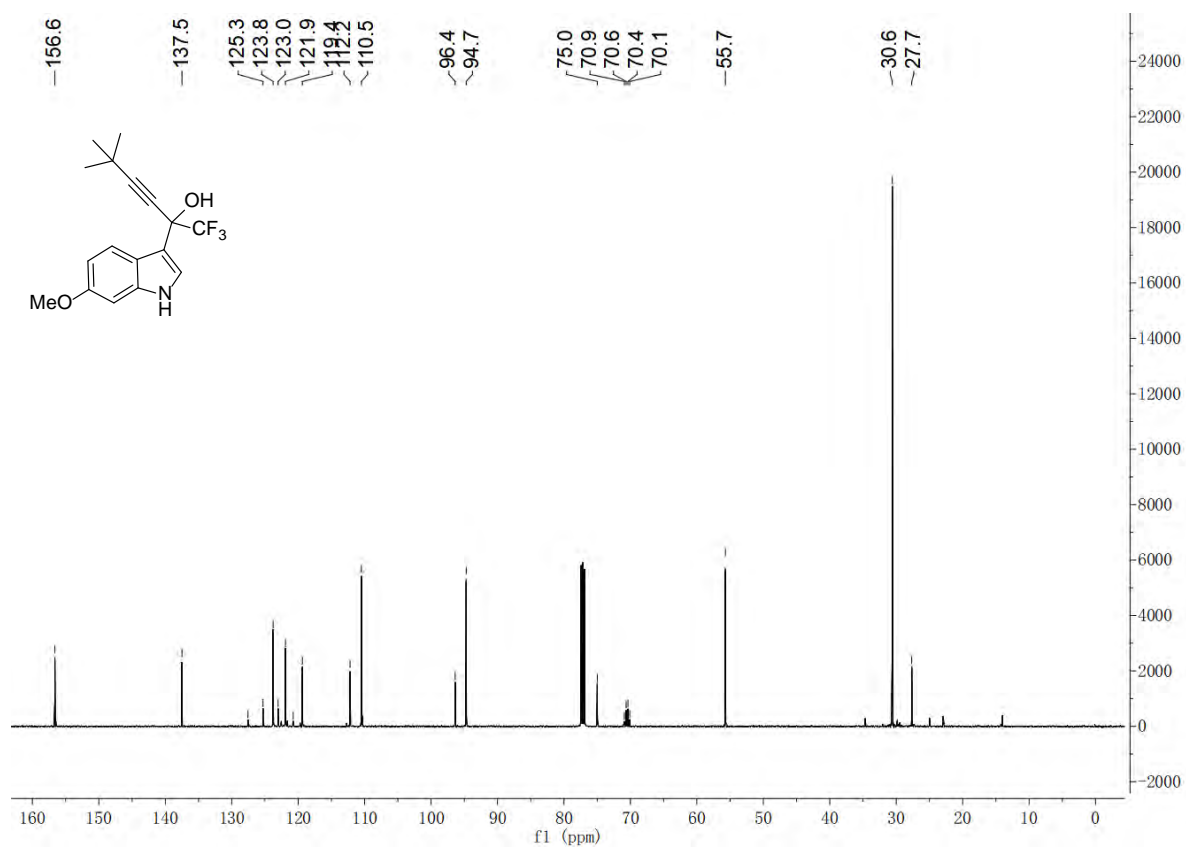

### <sup>19</sup>F NMR of compound 1j (in CDCl<sub>3</sub>)

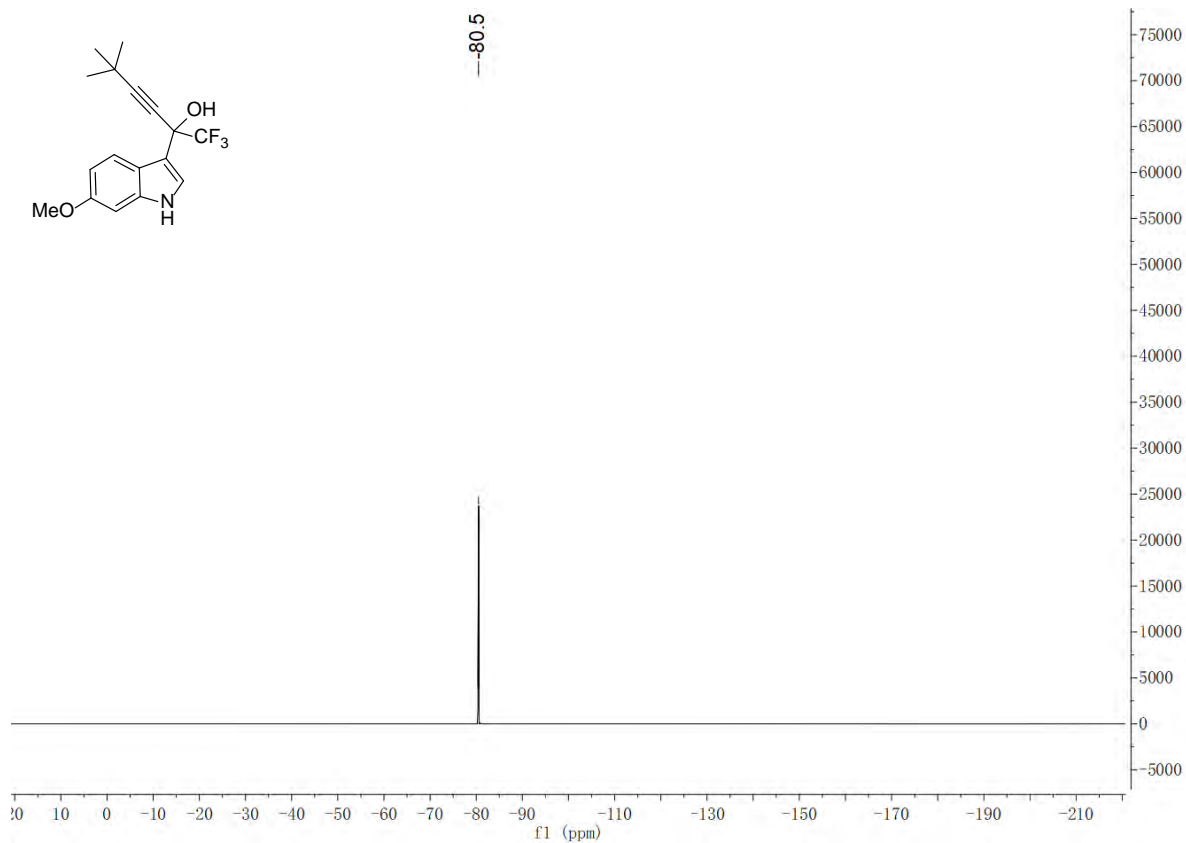

### <sup>1</sup>H NMR of compound 1k (in CDCl<sub>3</sub>)

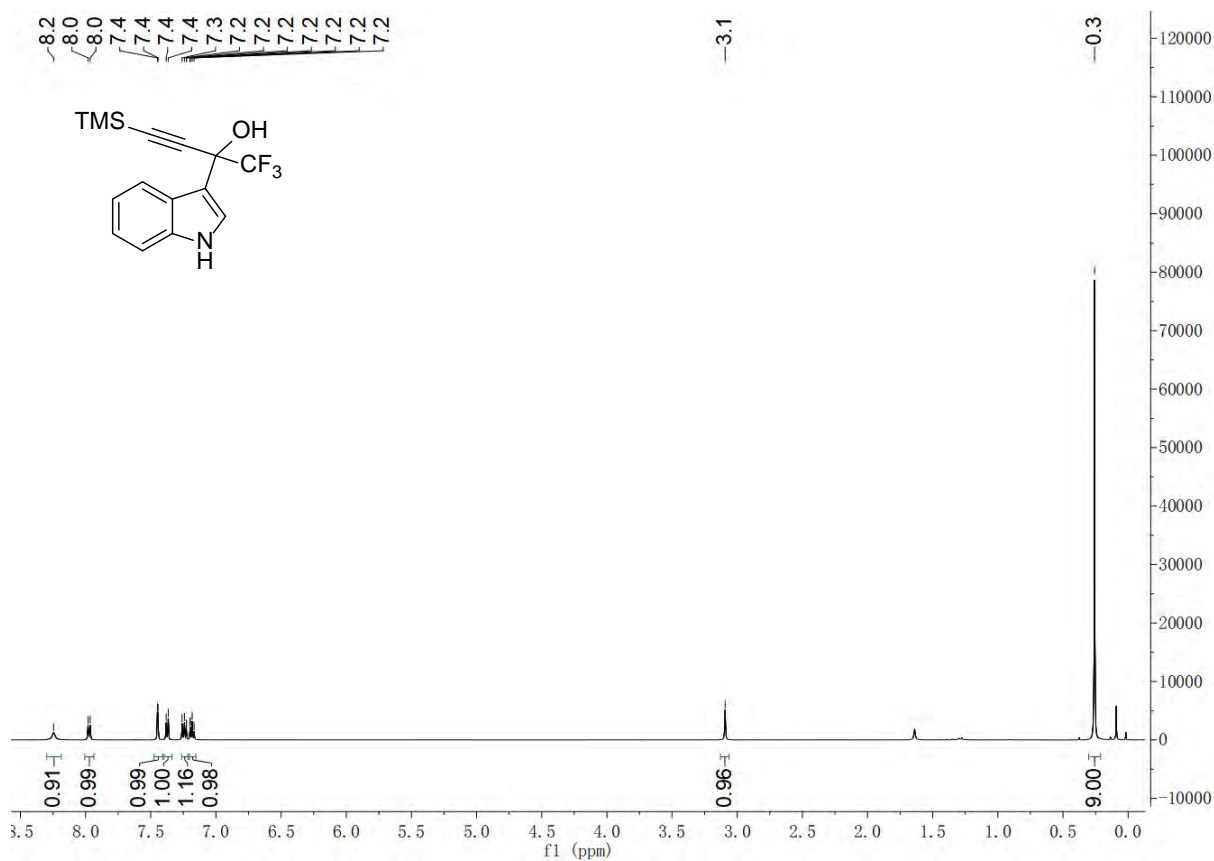

### <sup>13</sup>C NMR of compound 1k (in CDCl<sub>3</sub>)

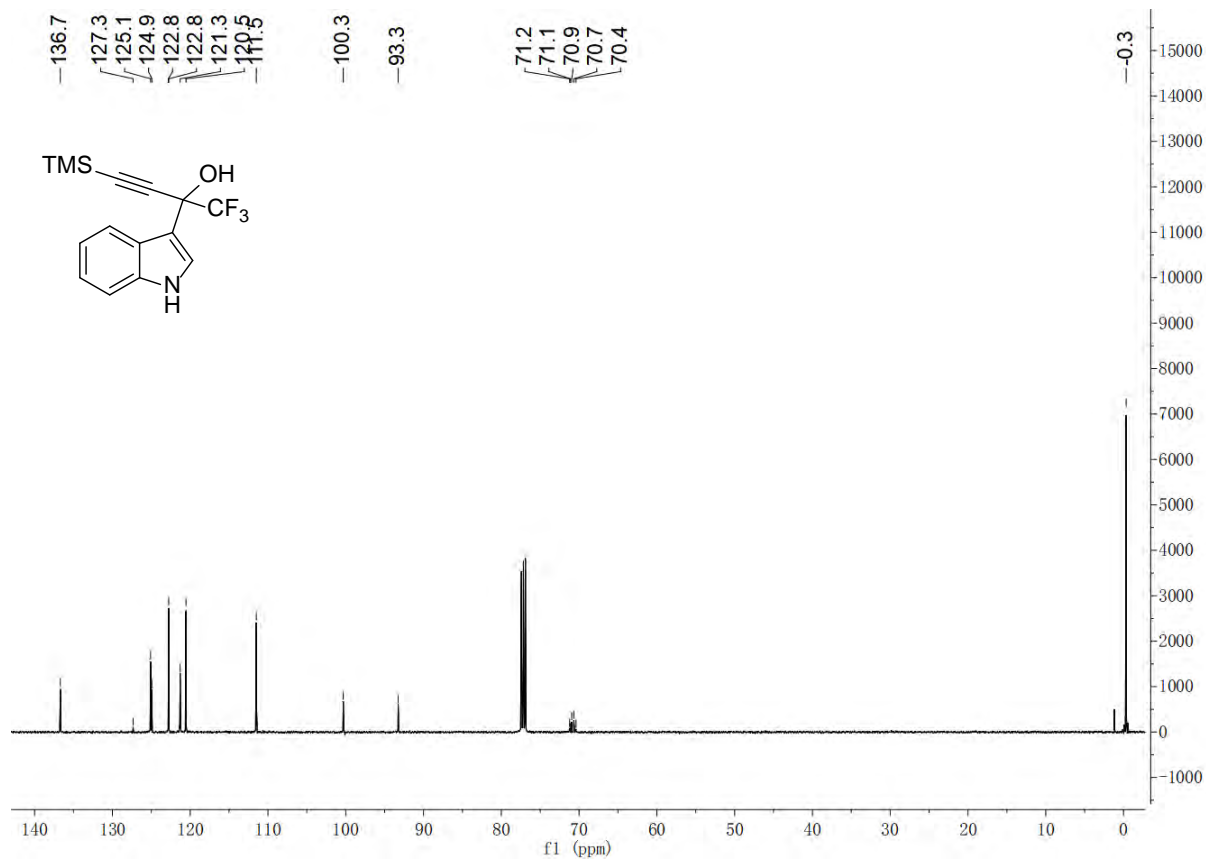



**<sup>19</sup>F NMR of compound 1k (in CDCl<sub>3</sub>)**

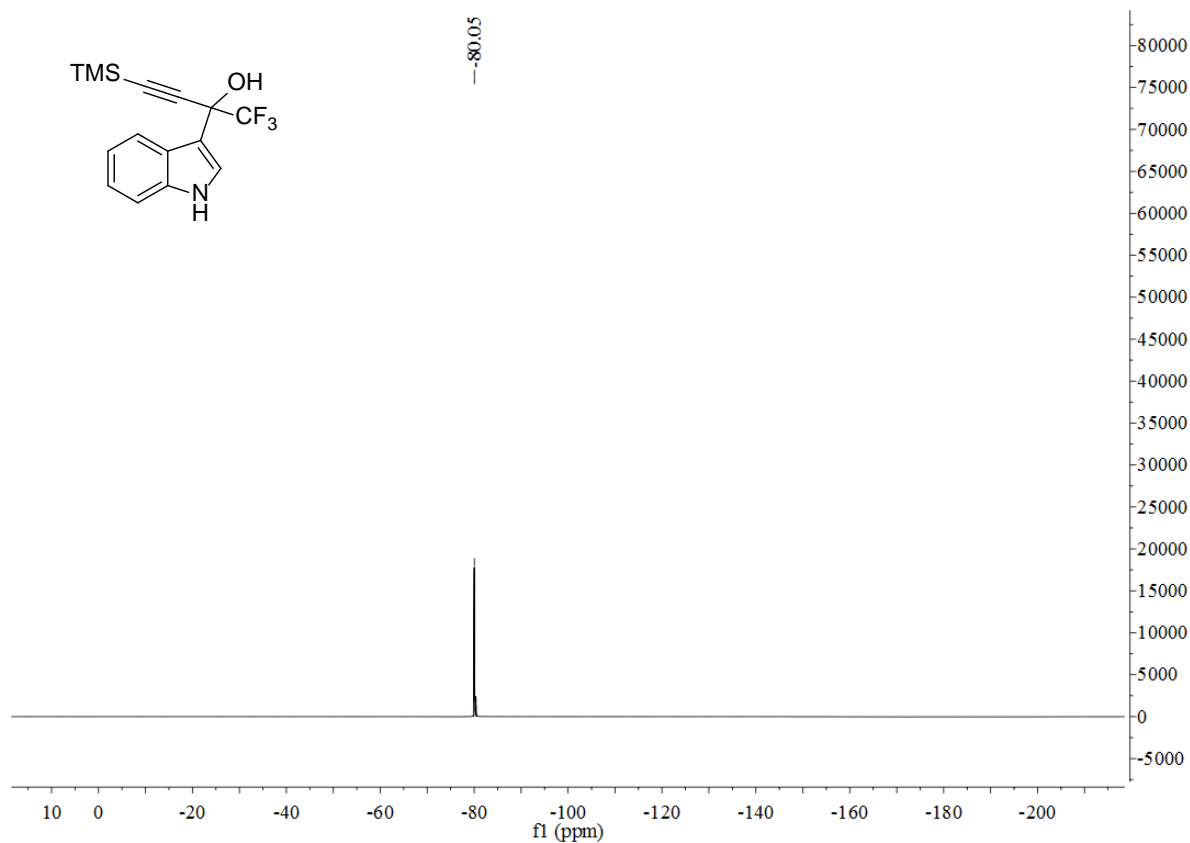

**<sup>1</sup>H NMR of compound 1l (in CDCl<sub>3</sub>)**

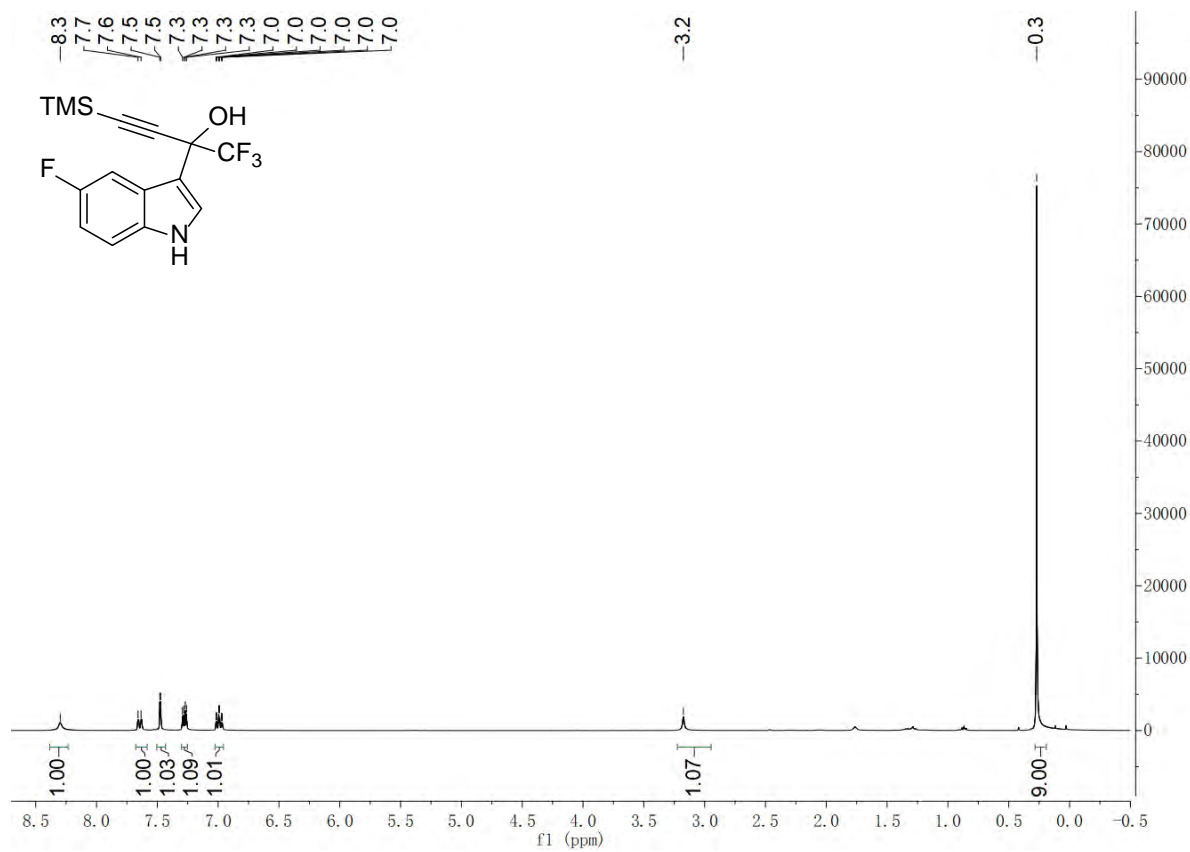

### <sup>13</sup>C NMR of compound 1I (in CDCl<sub>3</sub>)

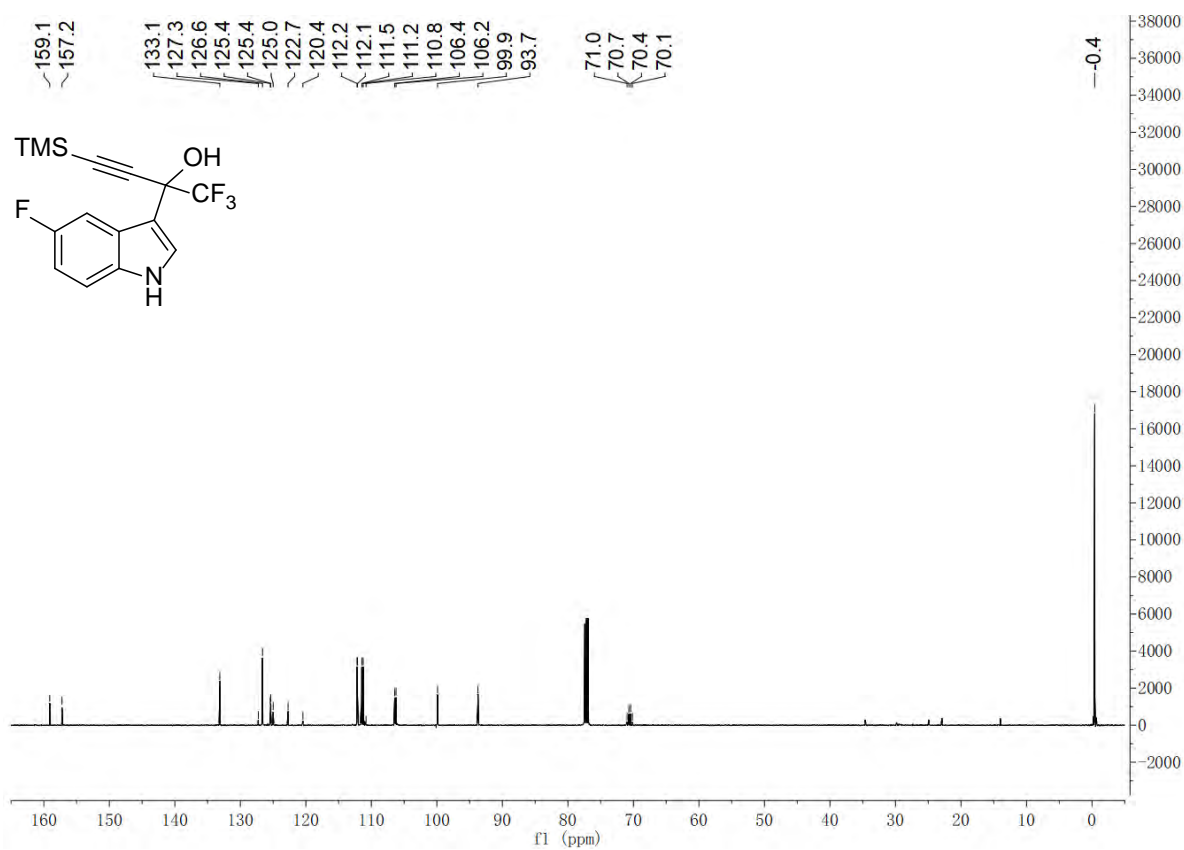

### <sup>19</sup>F NMR of compound 1I (in CDCl<sub>3</sub>)

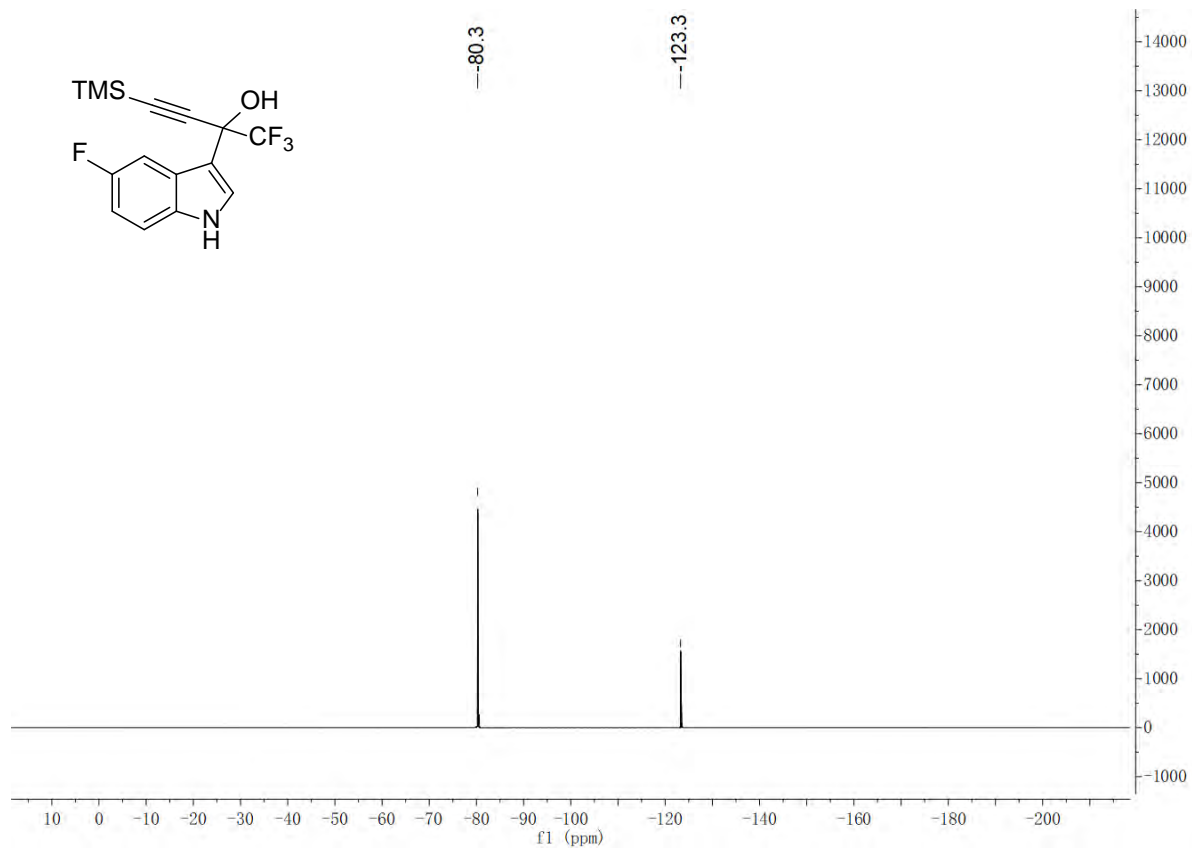

### <sup>1</sup>H NMR of compound 1m (in CDCl<sub>3</sub>)

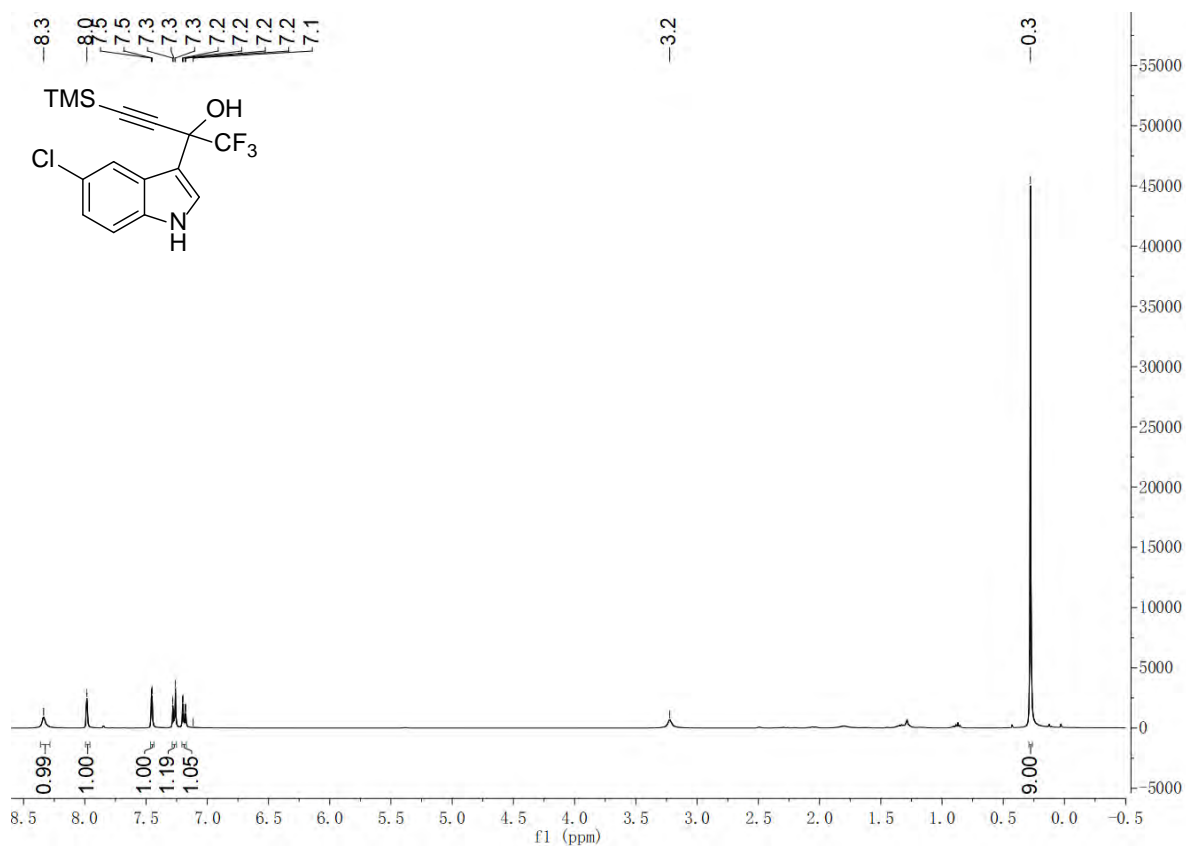

### <sup>13</sup>C NMR of compound 1m (in CDCl<sub>3</sub>)

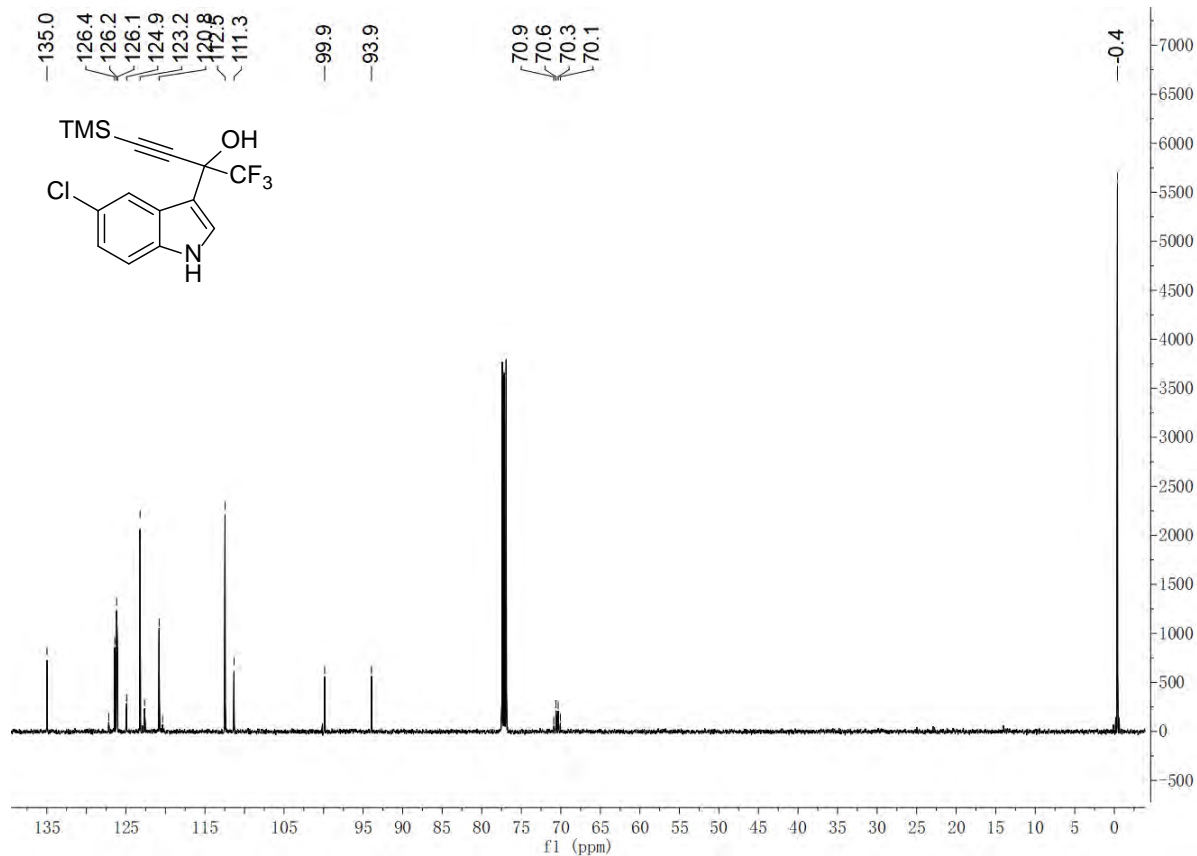

**<sup>19</sup>F NMR of compound 1m (in CDCl<sub>3</sub>)**

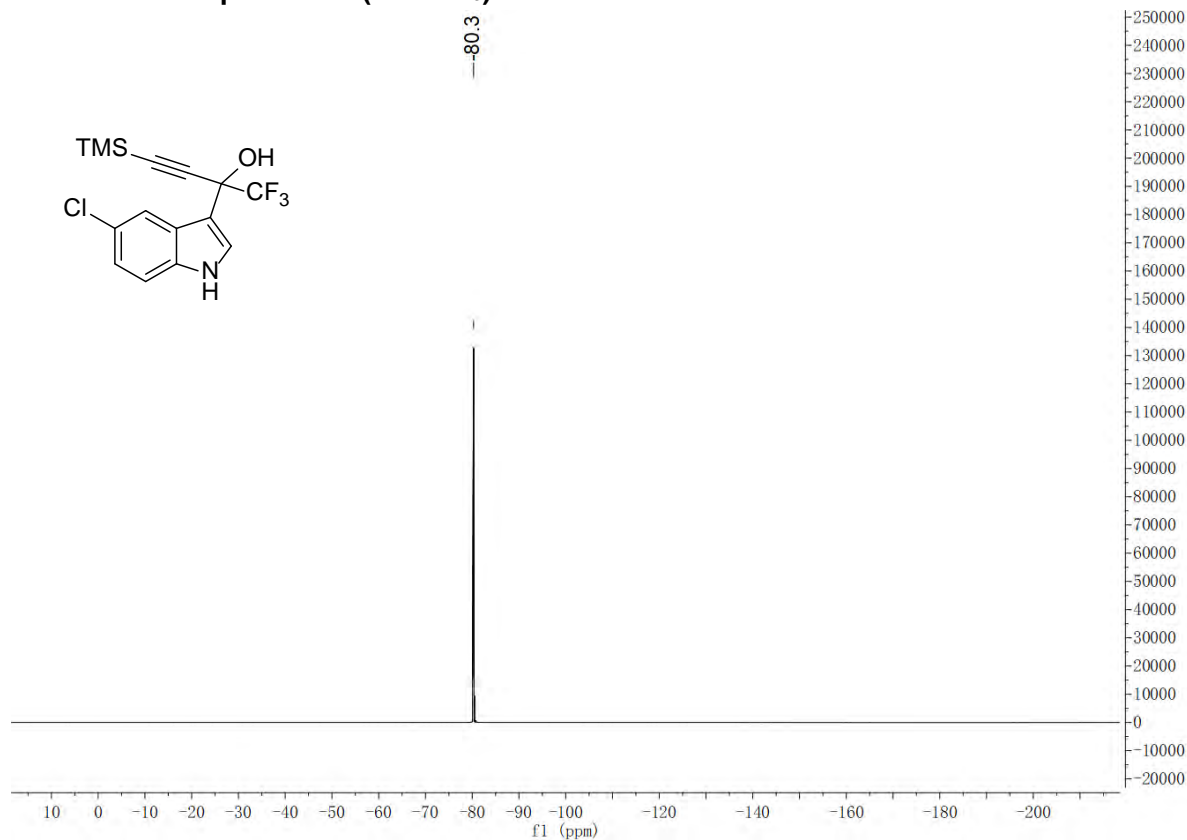

**<sup>1</sup>H NMR of compound 1n (in CDCl<sub>3</sub>)**

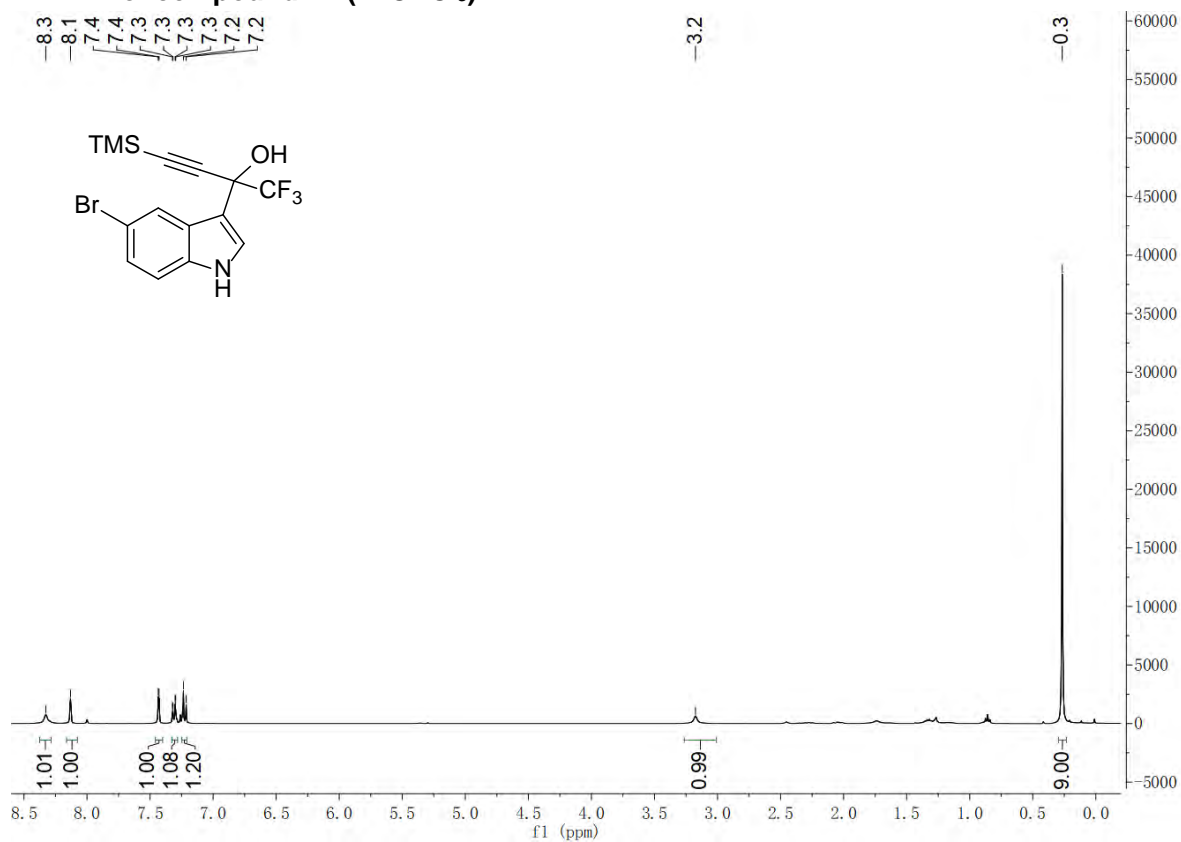

### <sup>13</sup>C NMR of compound 1n (in CDCl<sub>3</sub>)

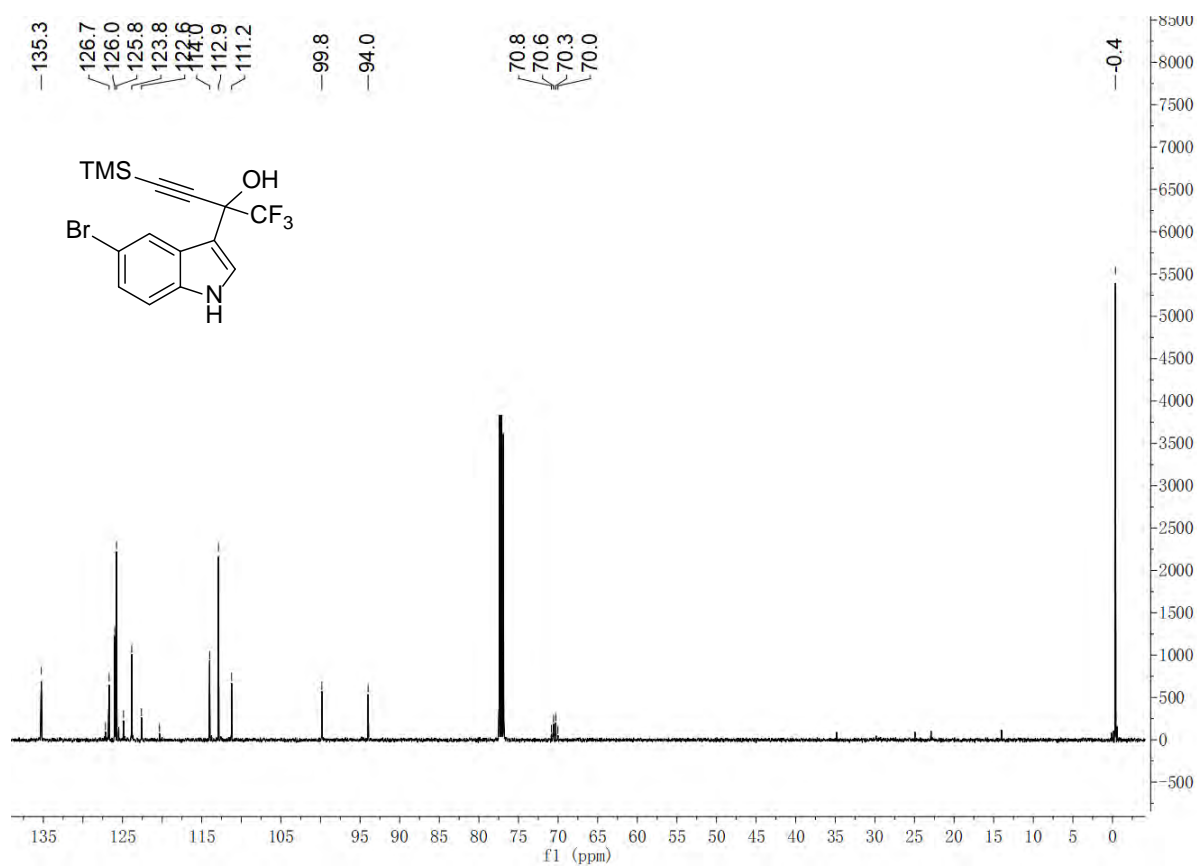

### <sup>19</sup>F NMR of compound 1n (in CDCl<sub>3</sub>)

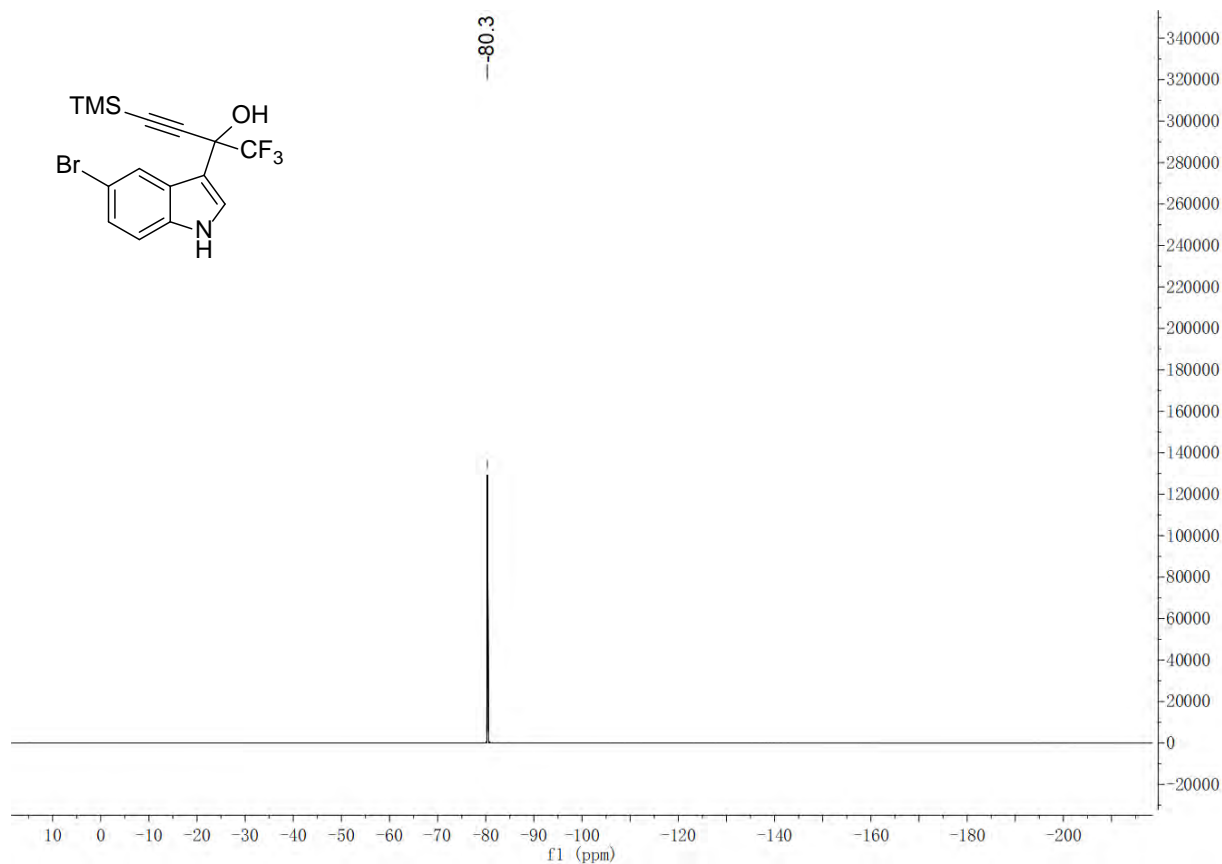

### <sup>1</sup>H NMR of compound 1o (in CDCl<sub>3</sub>)

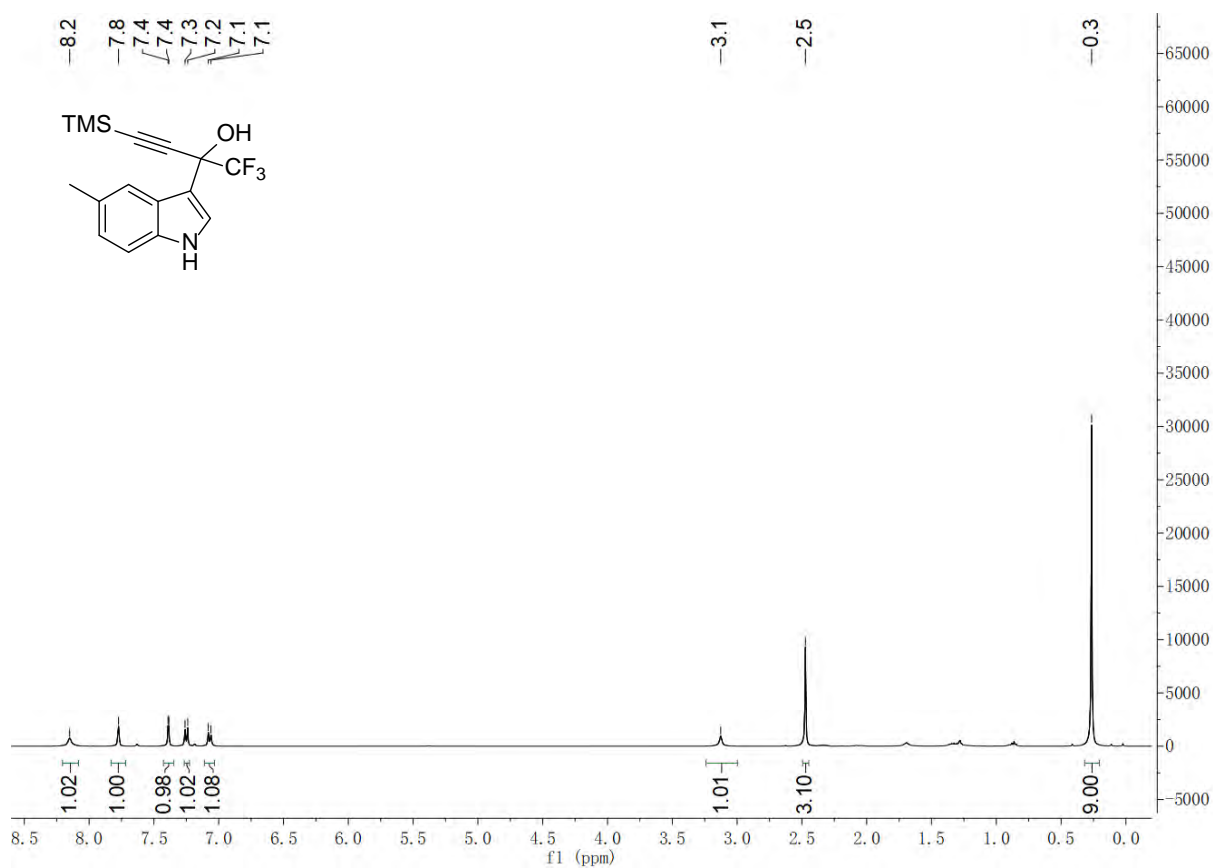

### <sup>13</sup>C NMR of compound 1o (in CDCl<sub>3</sub>)

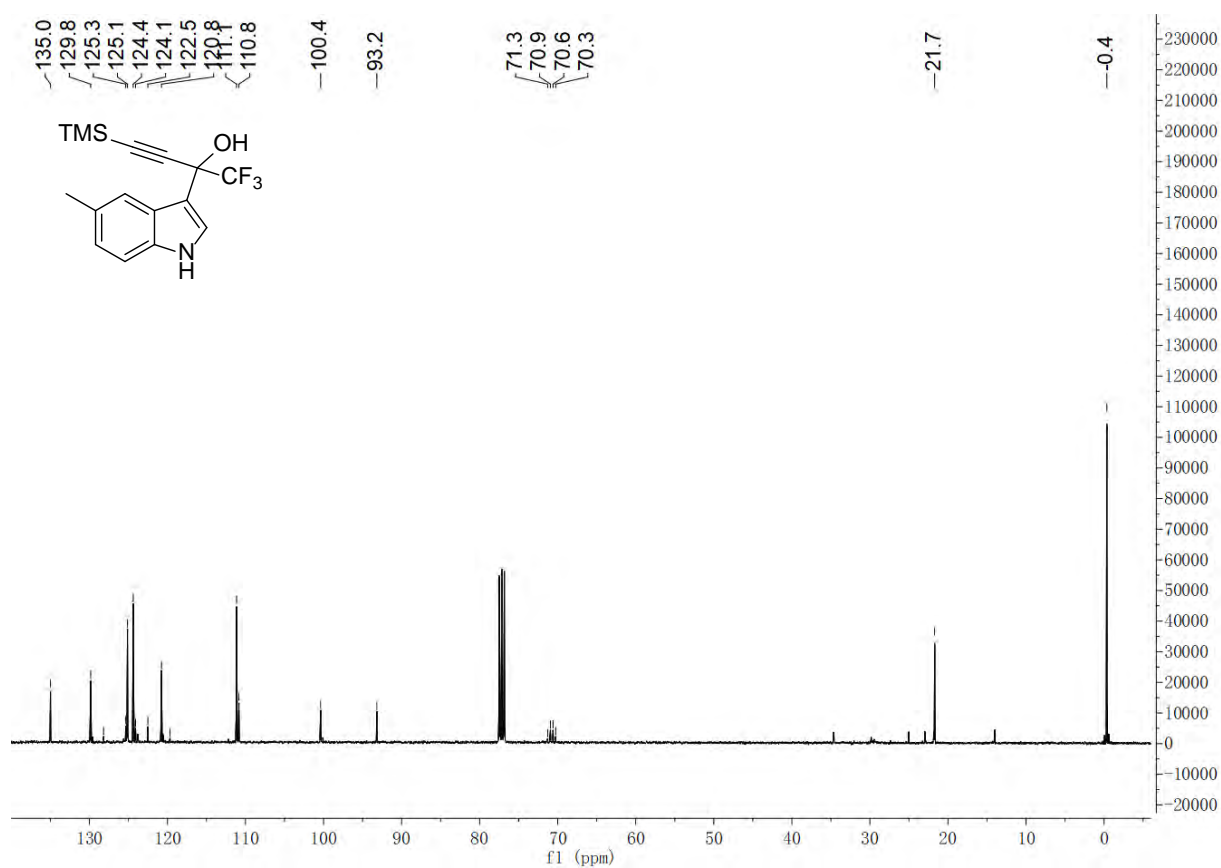

**<sup>19</sup>F NMR of compound 1o (in CDCl<sub>3</sub>)**

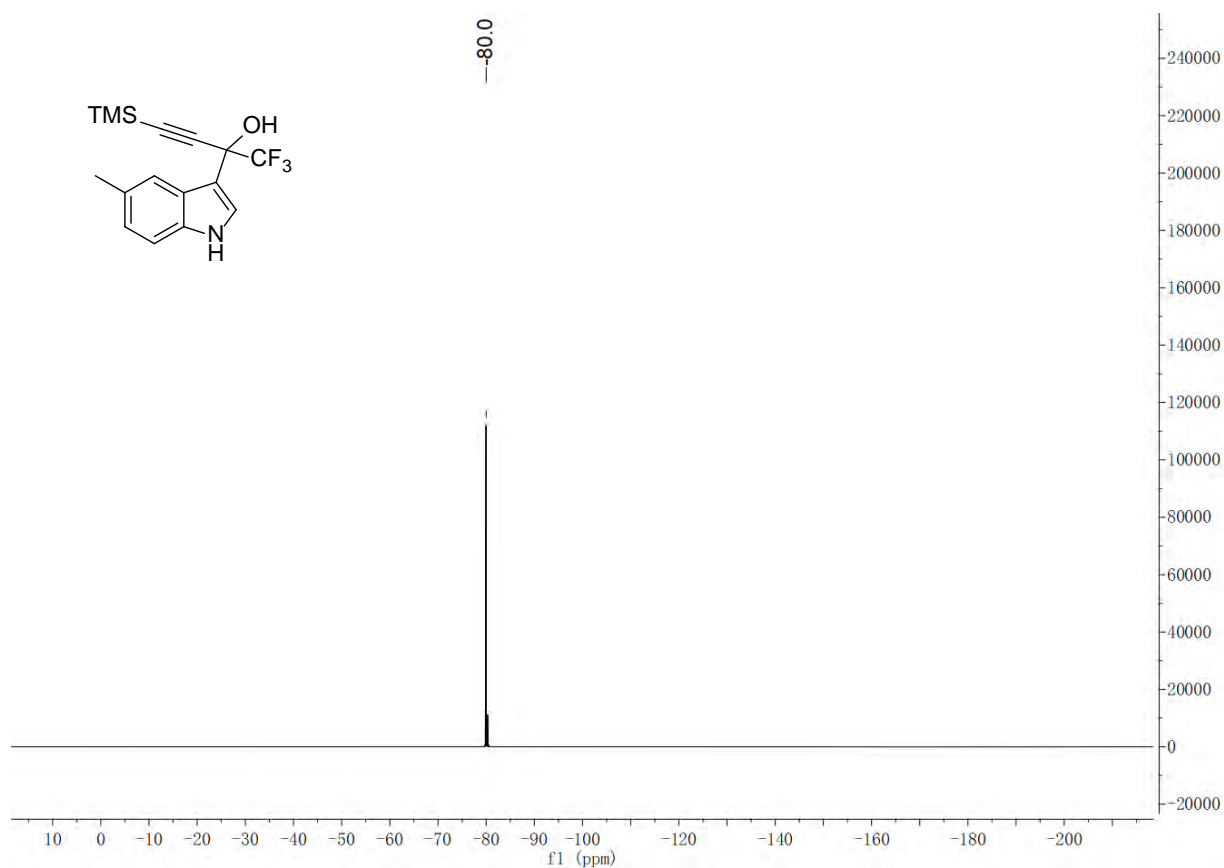

**<sup>1</sup>H NMR of compound 1p (in CDCl<sub>3</sub>)**

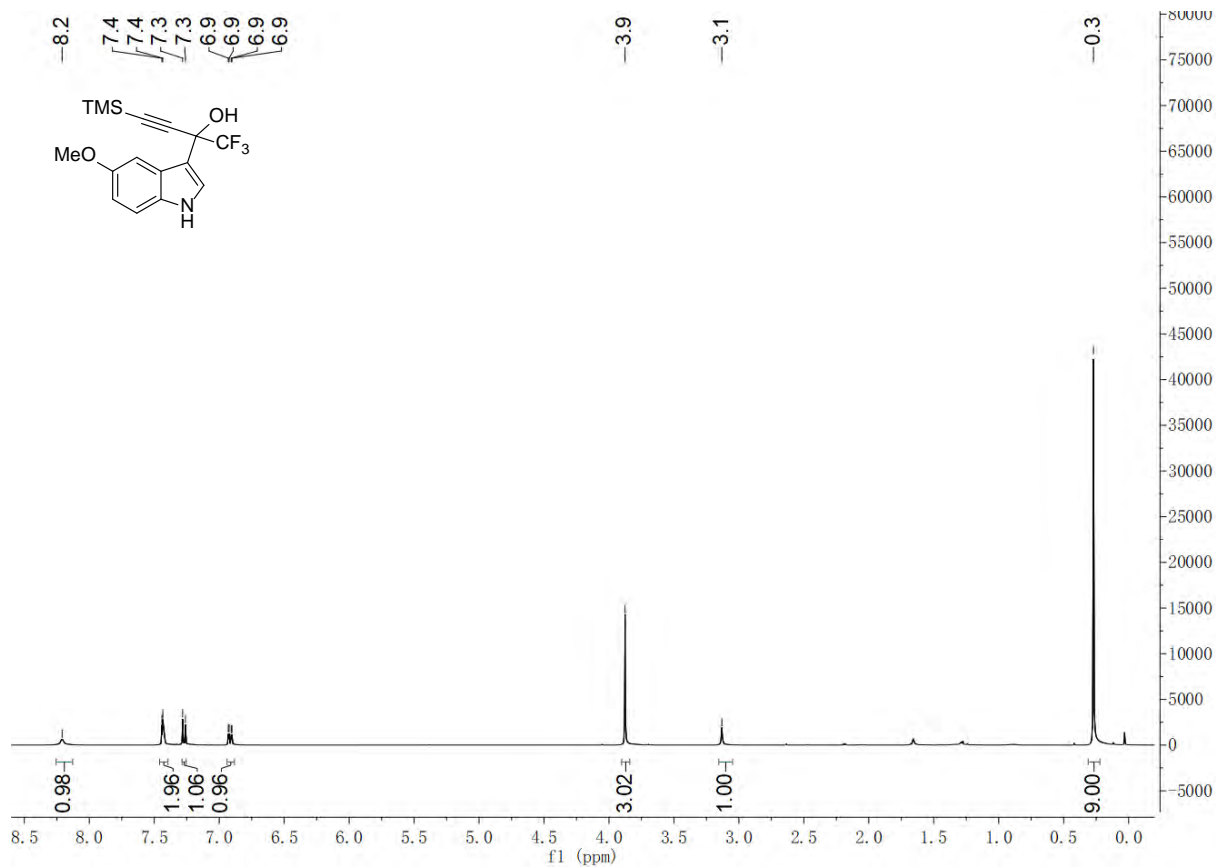

### <sup>13</sup>C NMR of compound 1p (in CDCl<sub>3</sub>)

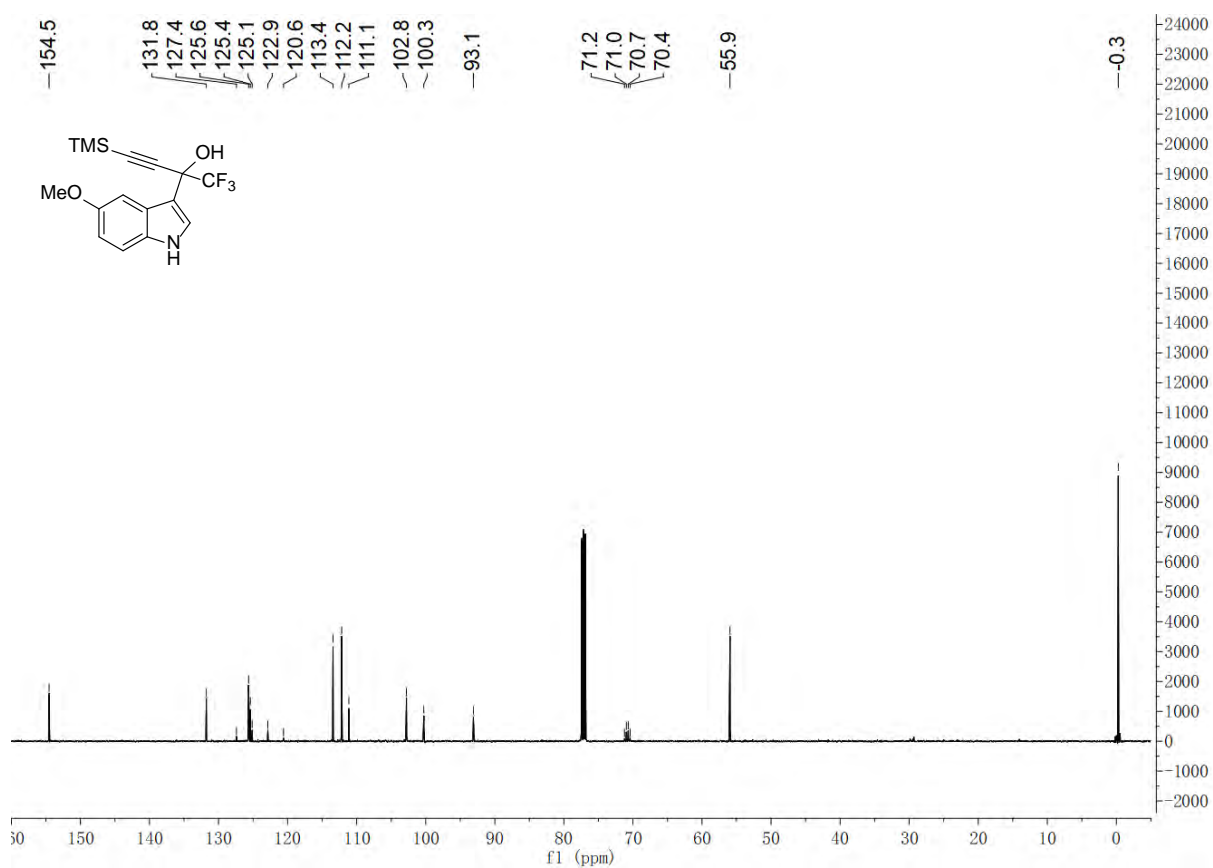

### <sup>19</sup>F NMR of compound 1p (in CDCl<sub>3</sub>)

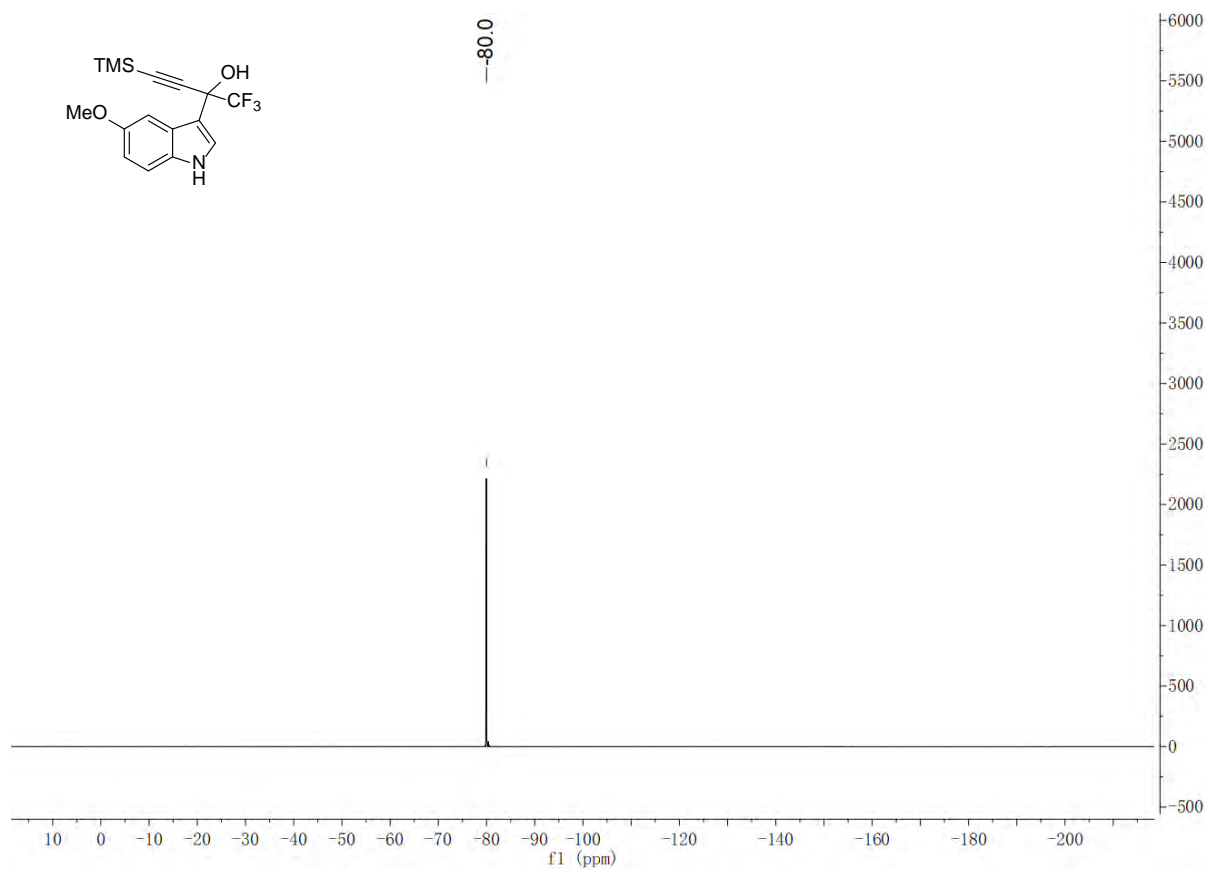



### <sup>1</sup>H NMR of compound 1q (in CDCl<sub>3</sub>)

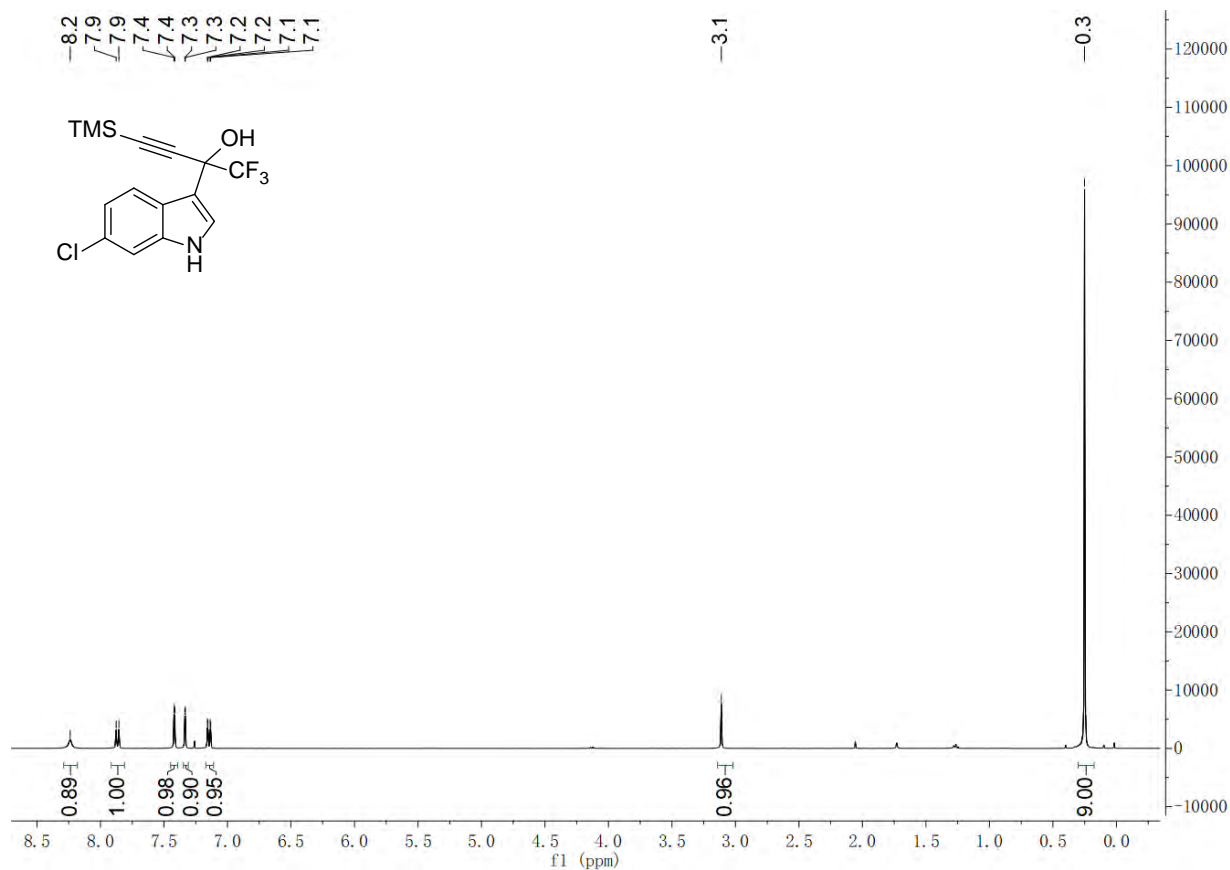

### <sup>13</sup>C NMR of compound 1q (in CDCl<sub>3</sub>)

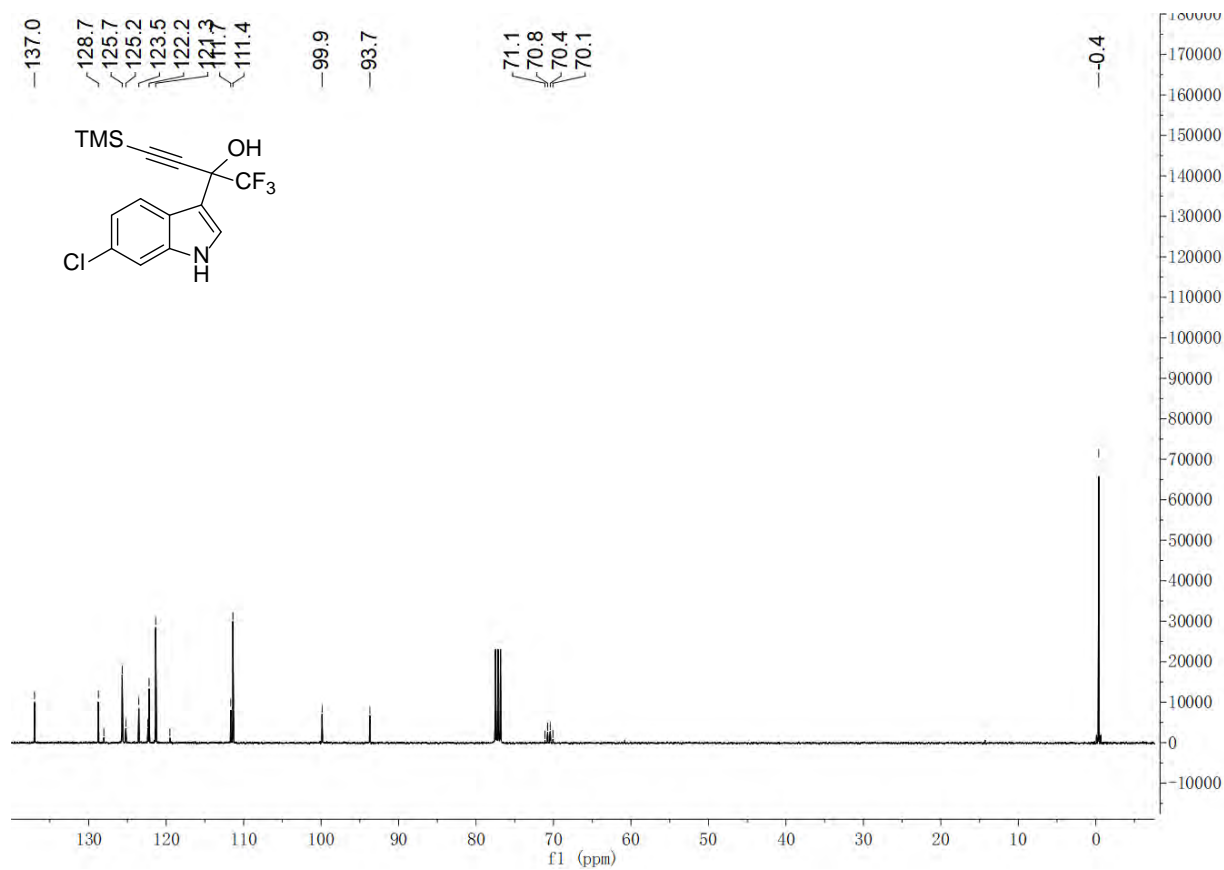

**<sup>19</sup>F NMR of compound 1q (in CDCl<sub>3</sub>)**

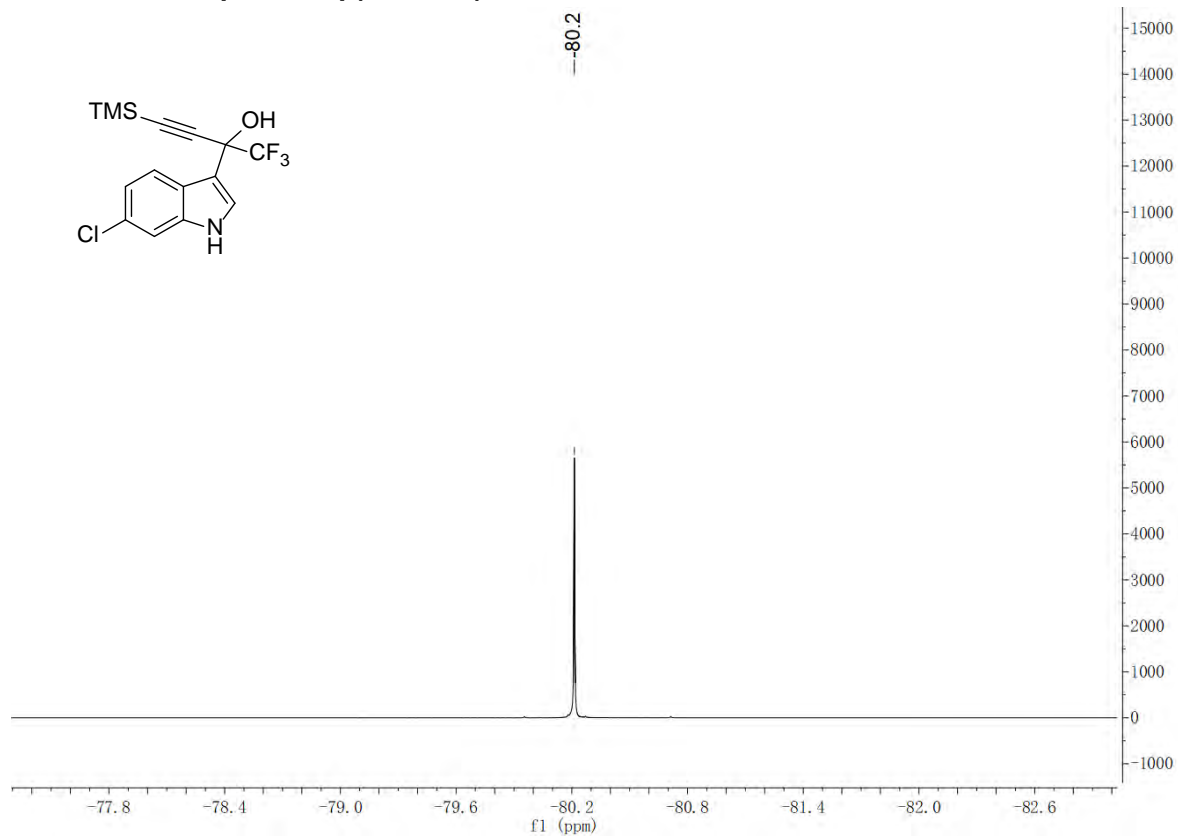

**<sup>1</sup>H NMR of compound 1r (in CDCl<sub>3</sub>)**

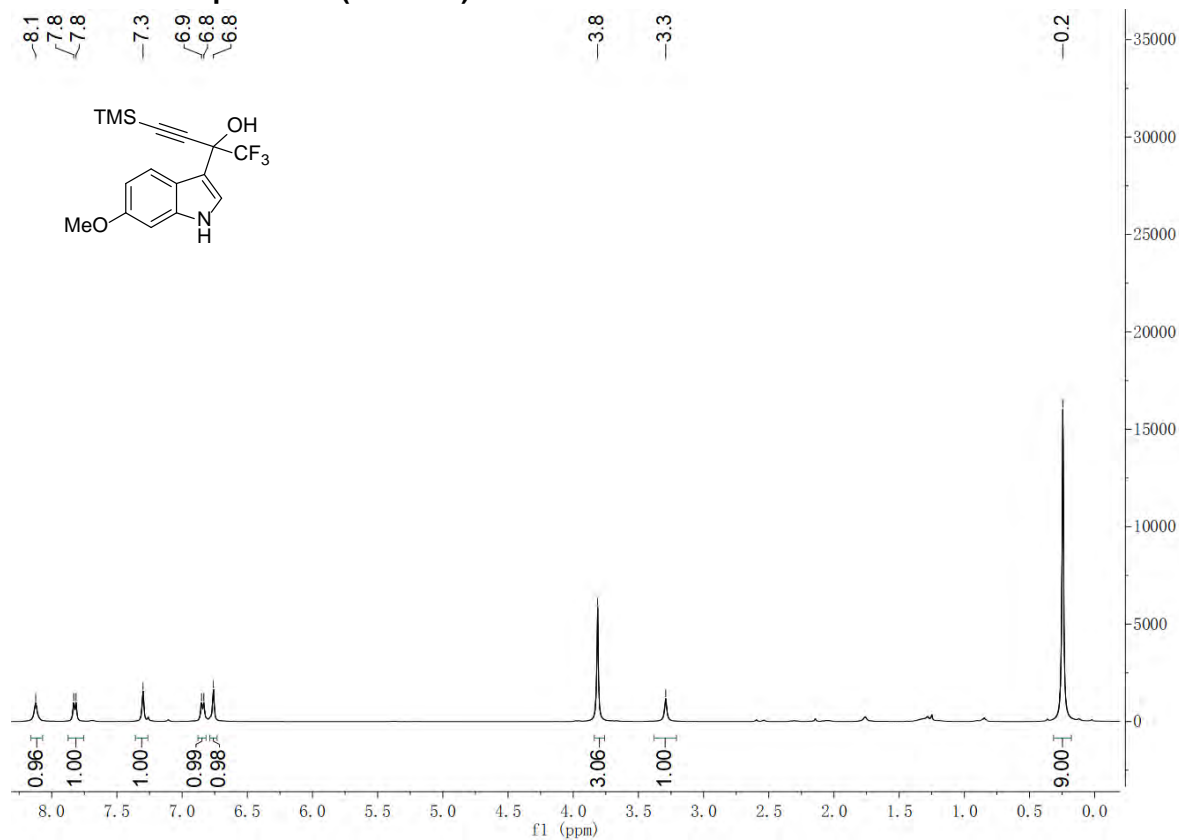

### <sup>13</sup>C NMR of compound 1r (in CDCl<sub>3</sub>)

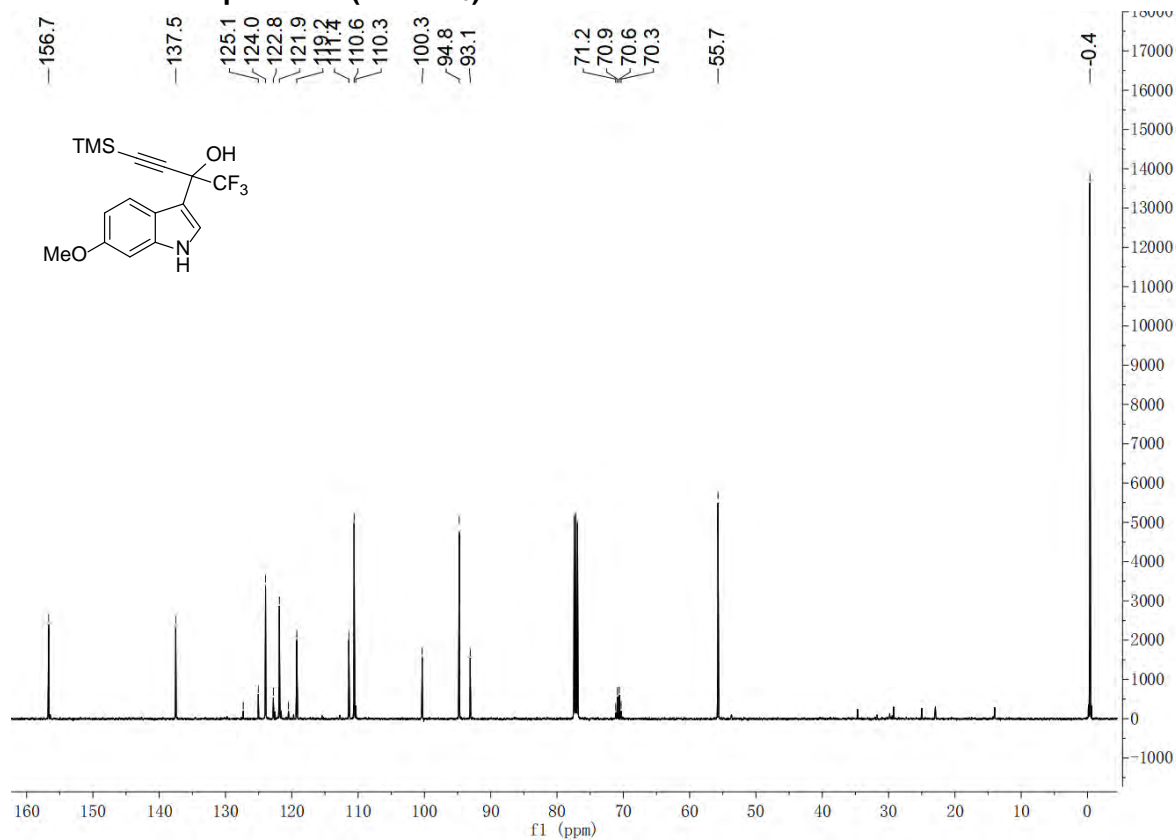

### <sup>19</sup>F NMR of compound 1r (in CDCl<sub>3</sub>)

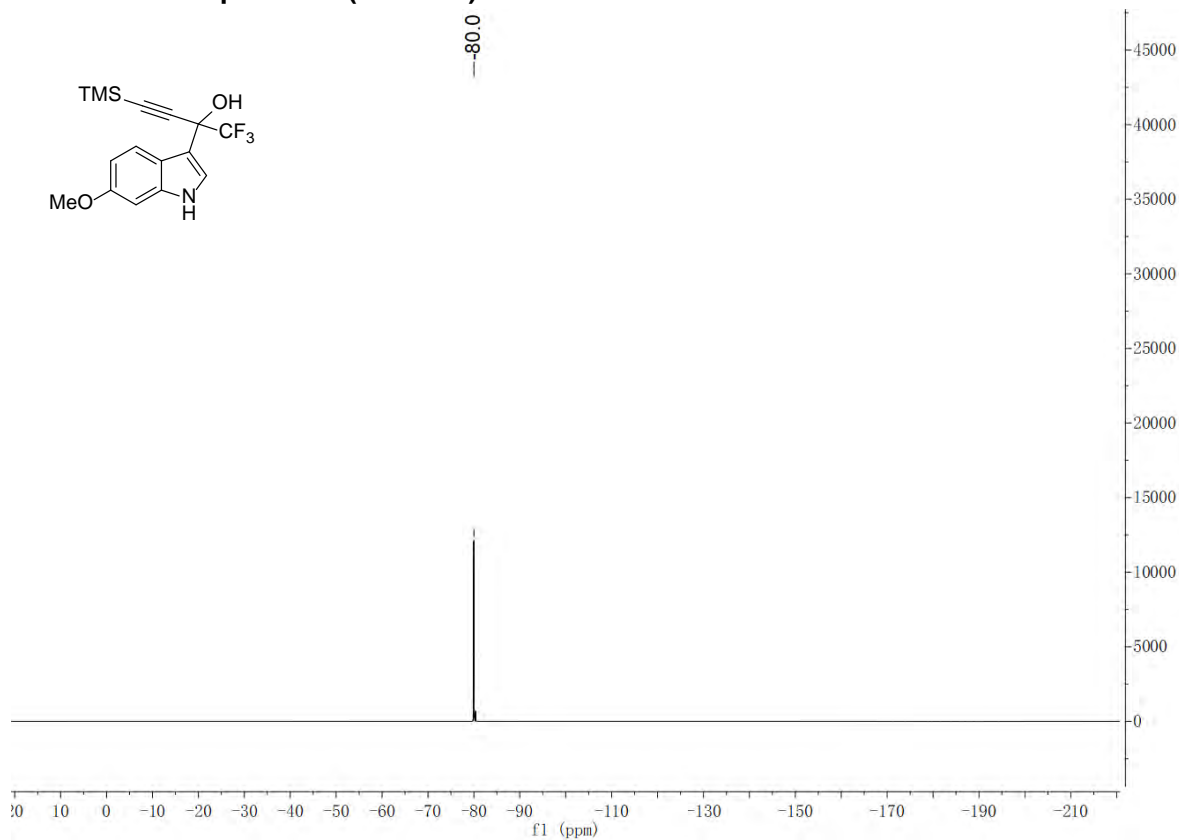

### <sup>1</sup>H NMR of compound 1s (in CDCl<sub>3</sub>)

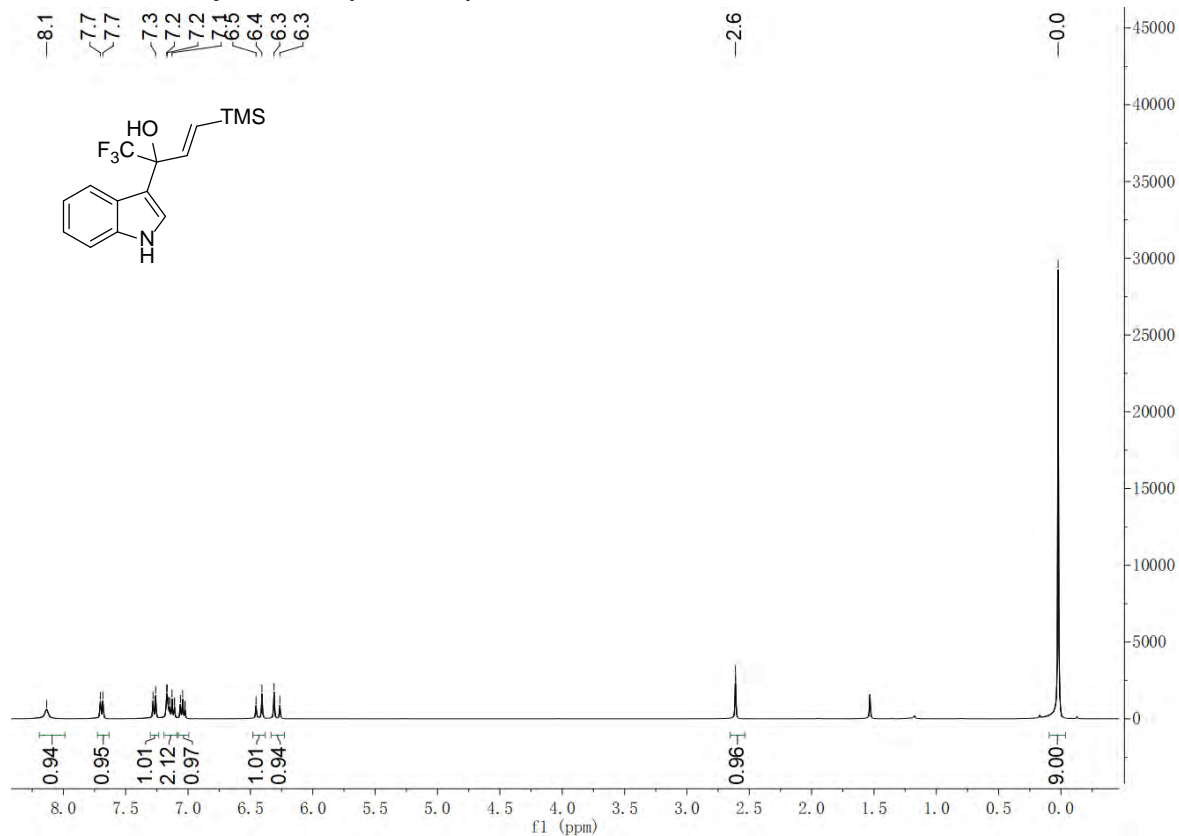

### <sup>13</sup>C NMR of compound 1s (in CDCl<sub>3</sub>)

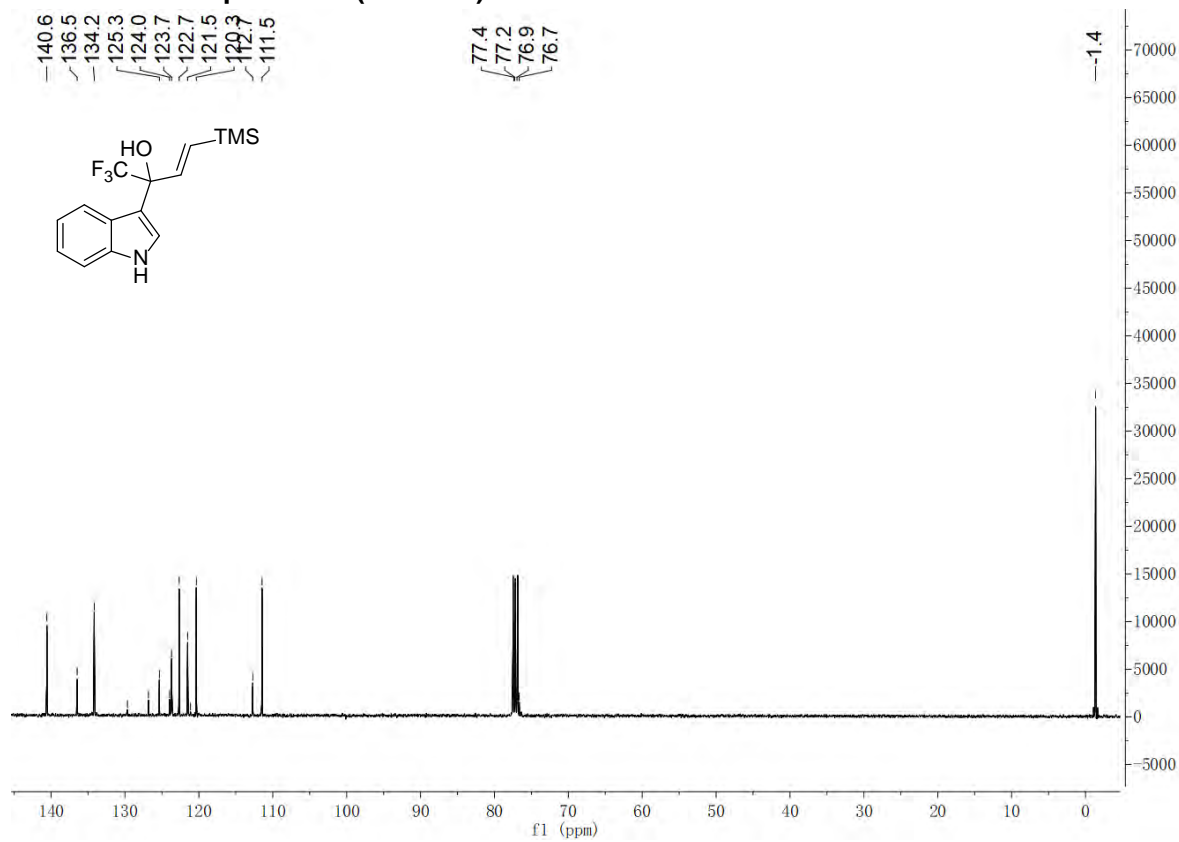

### $^{19}\text{F}$ NMR of compound 1s (in $\text{CDCl}_3$ )

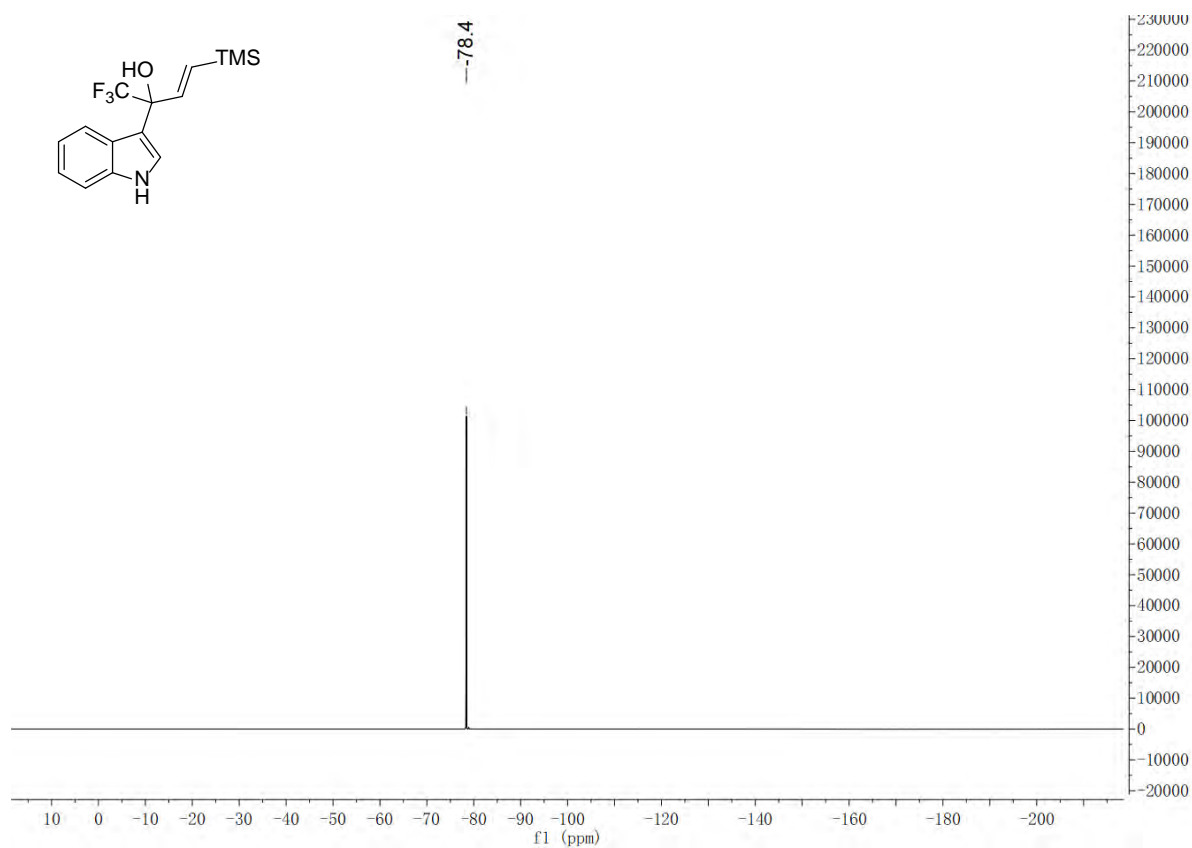

### $^1\text{H}$ NMR of compound 1t (in $\text{CDCl}_3$ )

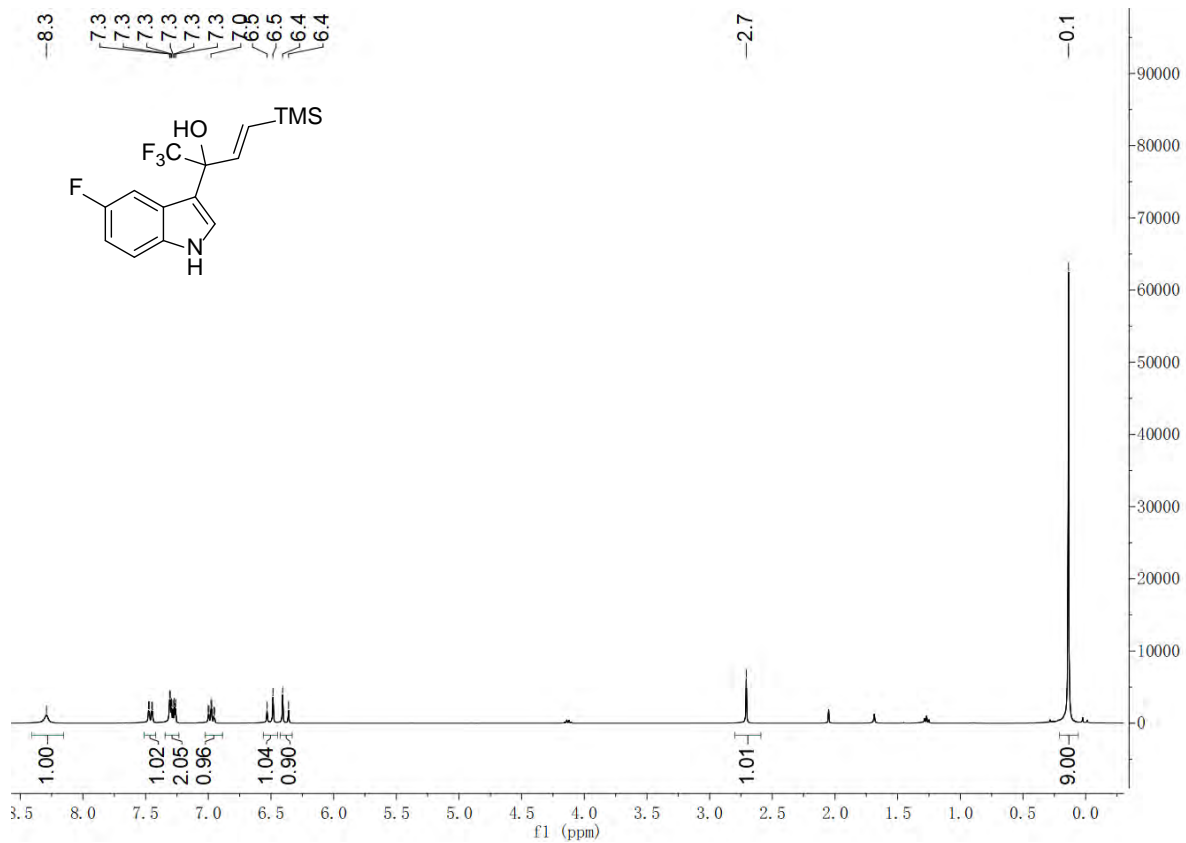

### <sup>13</sup>C NMR of compound 1t (in CDCl<sub>3</sub>)

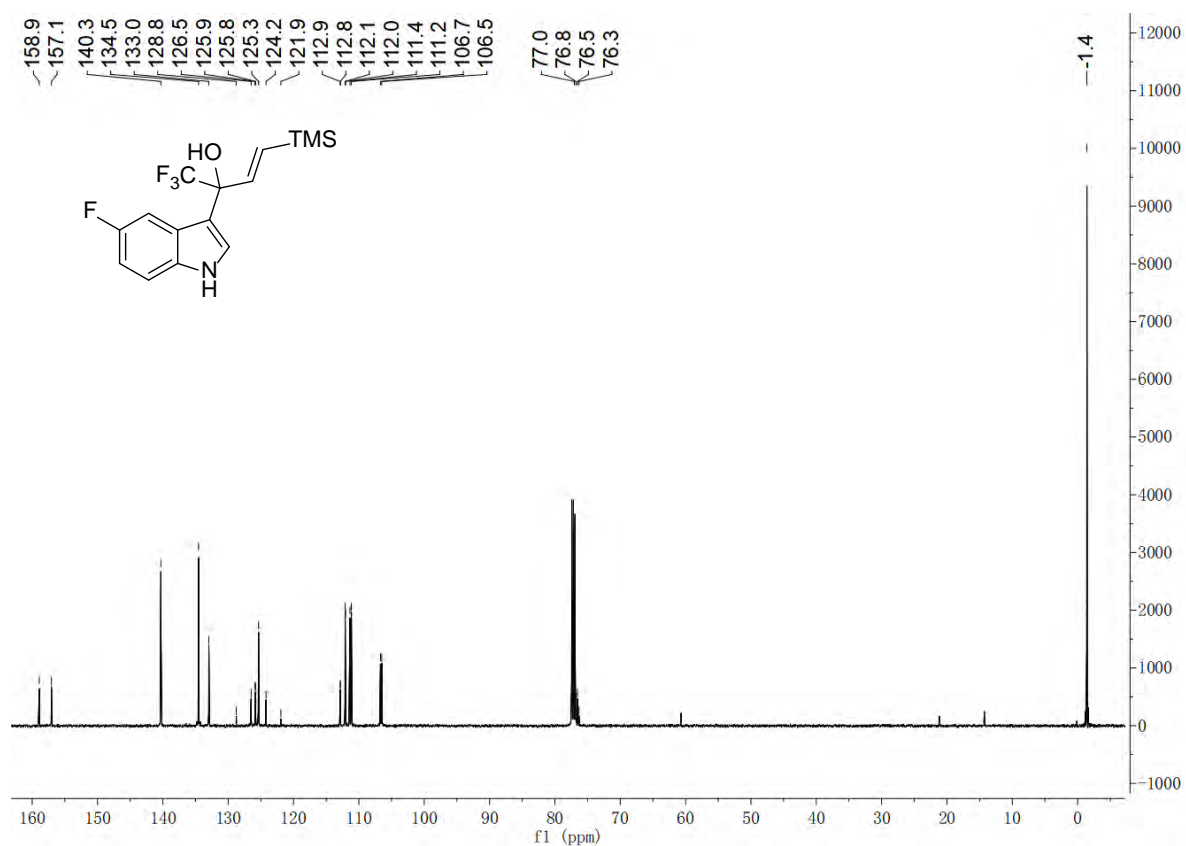

### <sup>19</sup>F NMR of compound 1t (in CDCl<sub>3</sub>)

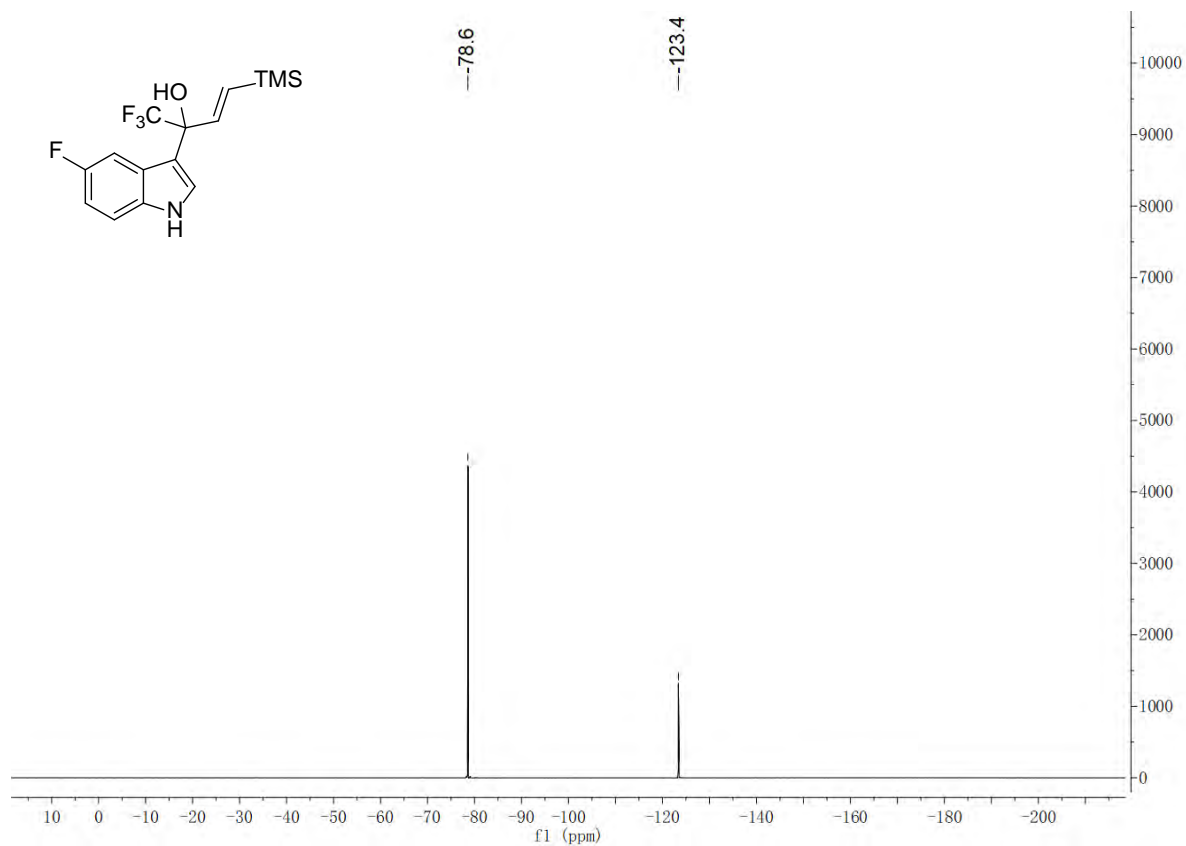

**<sup>1</sup>H NMR of compound 1u (in CDCl<sub>3</sub>)**

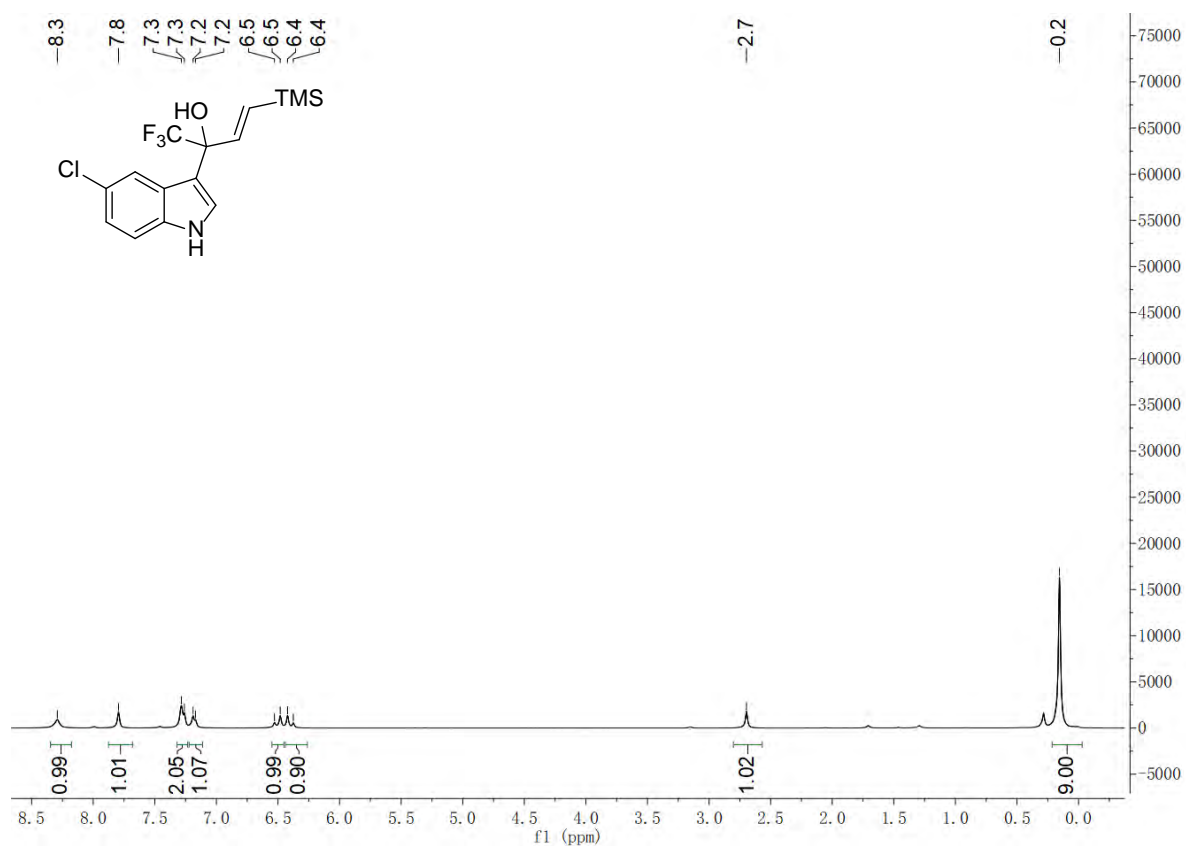

**<sup>13</sup>C NMR of compound 1u (in CDCl<sub>3</sub>)**

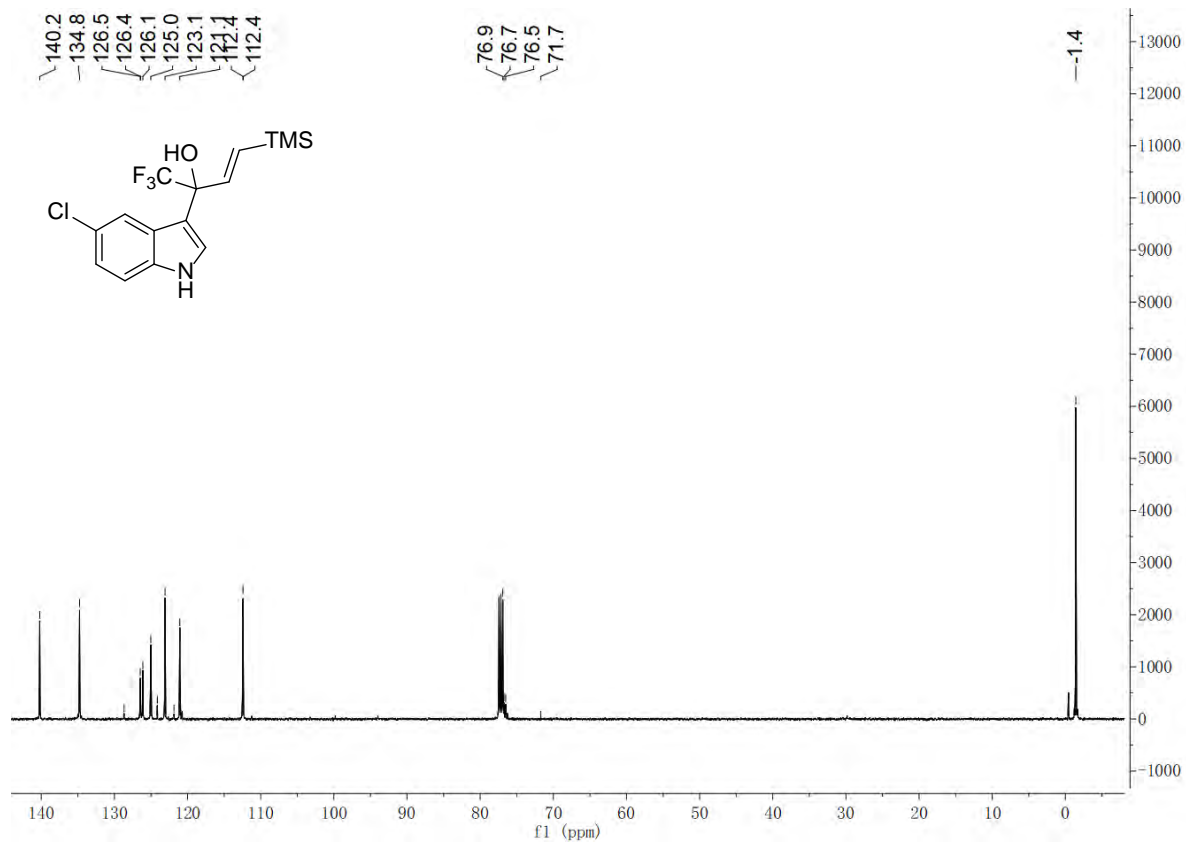

### <sup>19</sup>F NMR of compound 1u (in CDCl<sub>3</sub>)

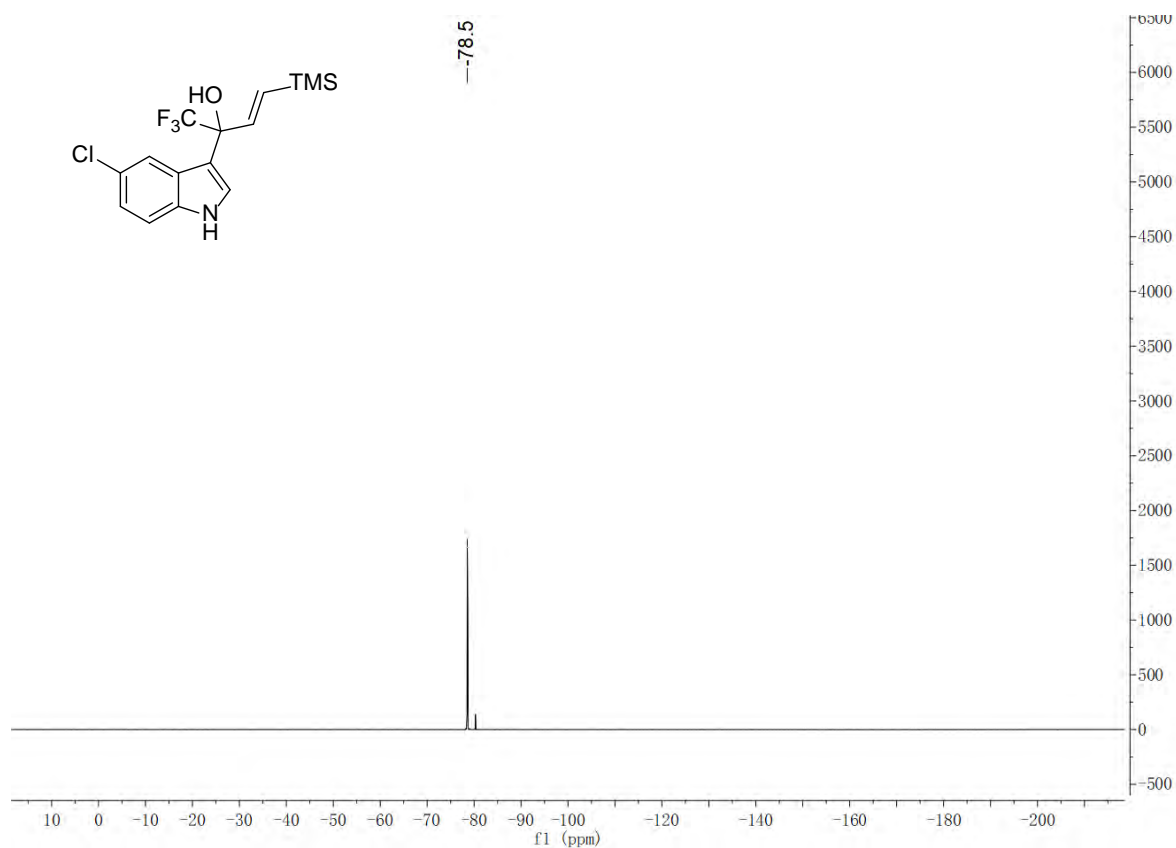

### <sup>1</sup>H NMR of compound 1v (in DMSO-d<sub>6</sub>)

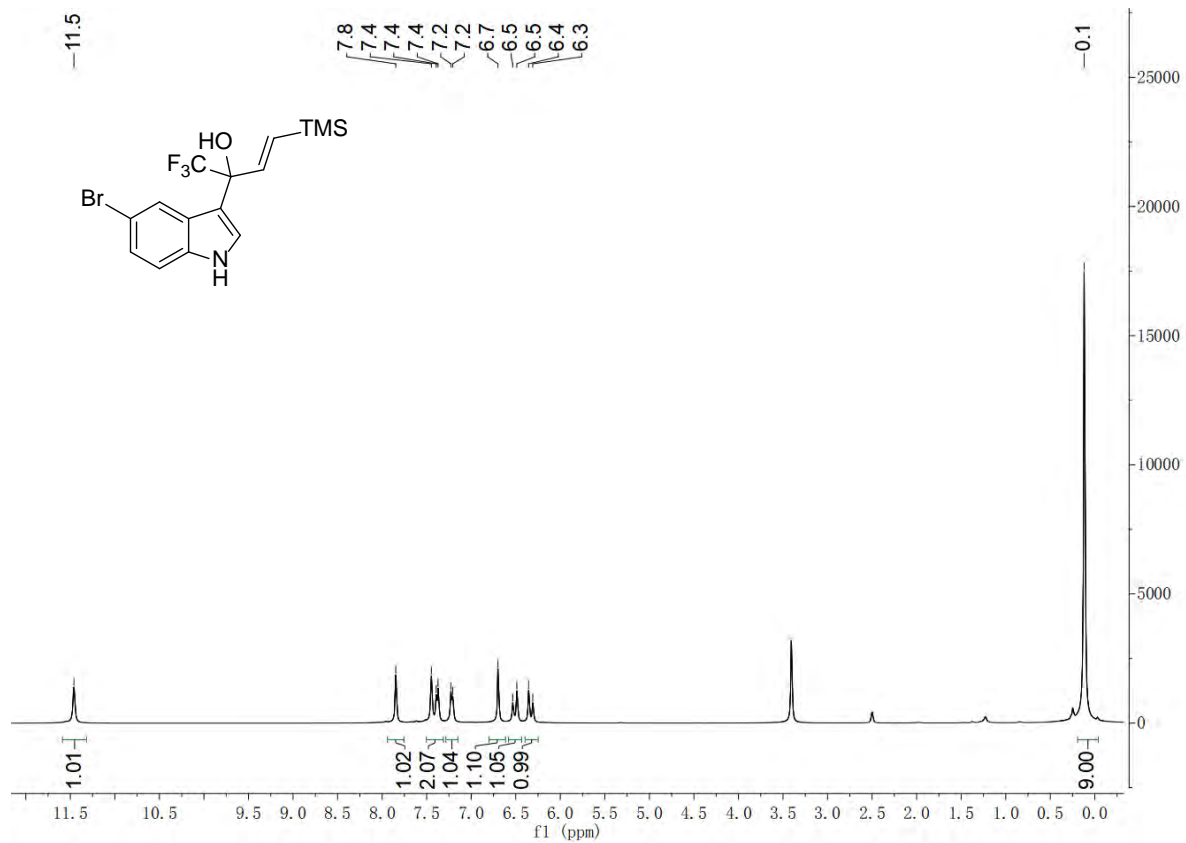



### <sup>13</sup>C NMR of compound 1v (in DMSO-d<sub>6</sub>)

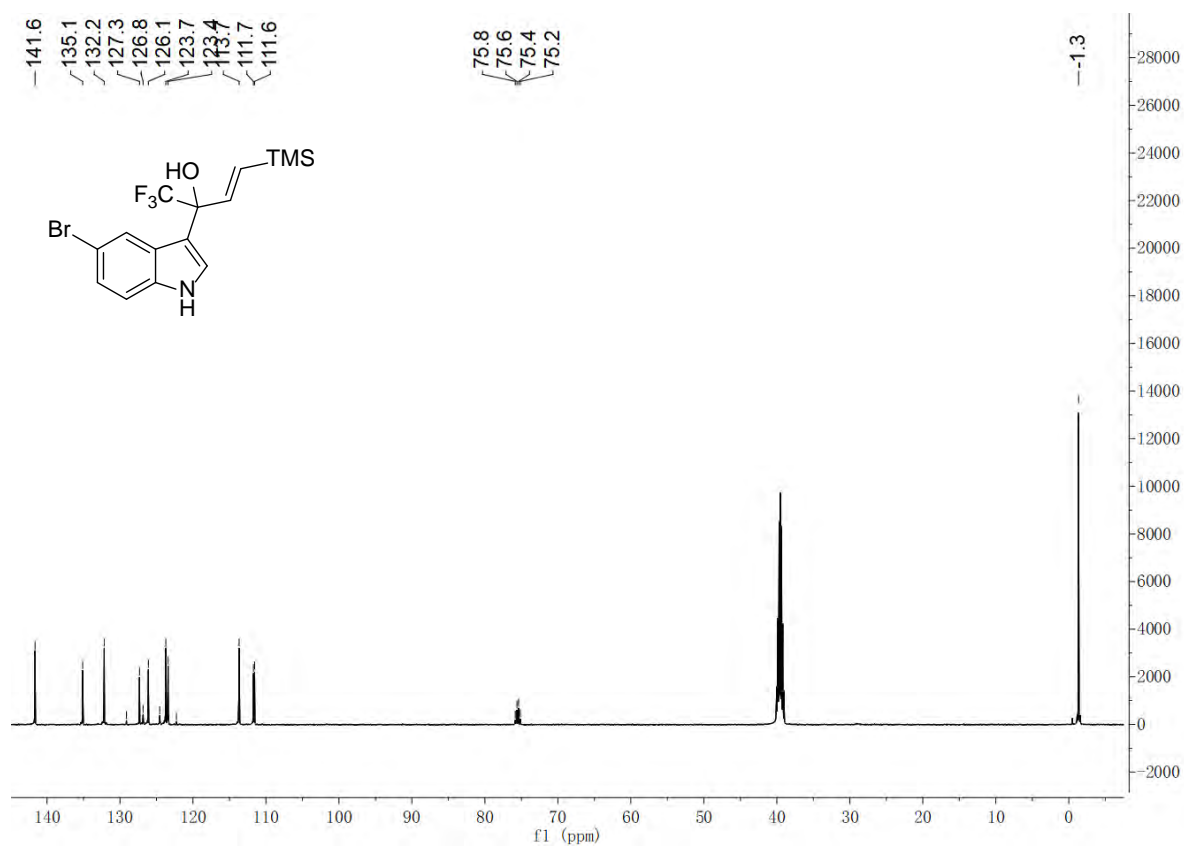

### <sup>19</sup>F NMR of compound 1v (in DMSO-d<sub>6</sub>)

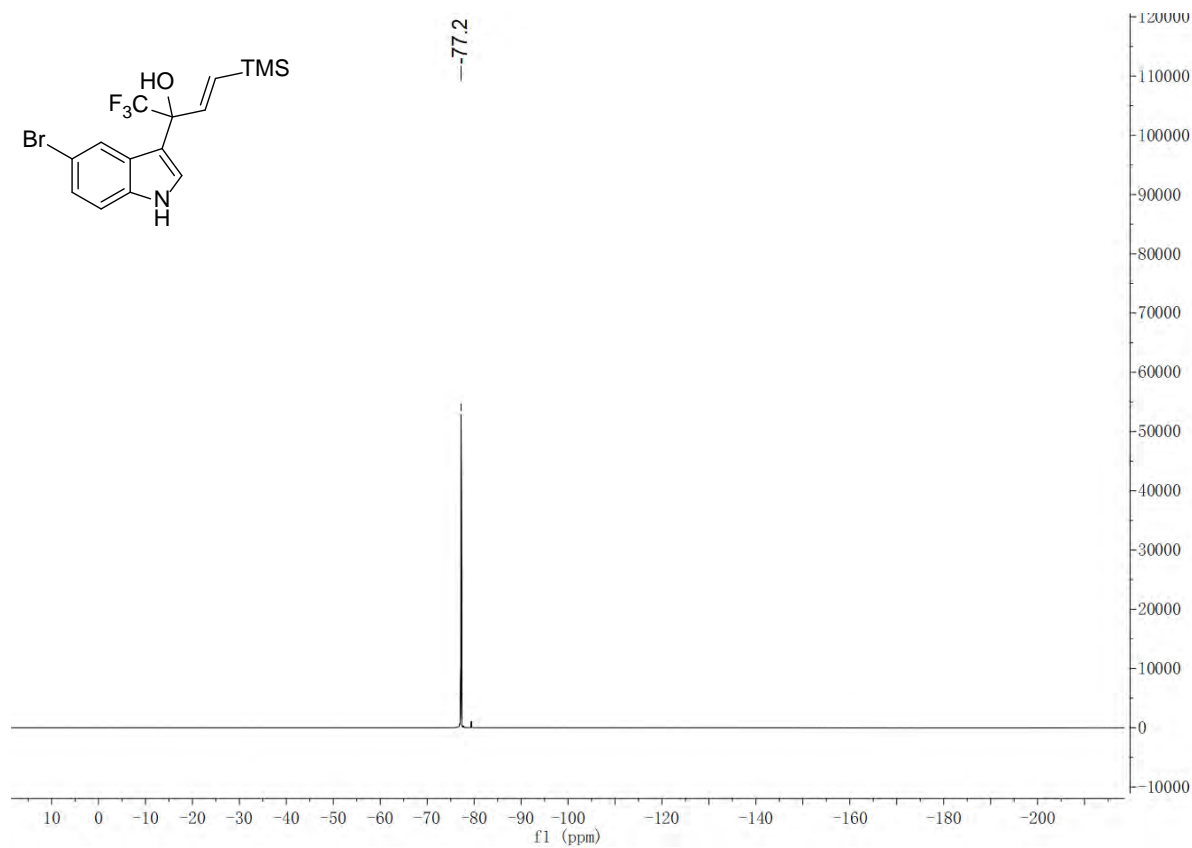

### <sup>1</sup>H NMR of compound 1w (in CDCl<sub>3</sub>)

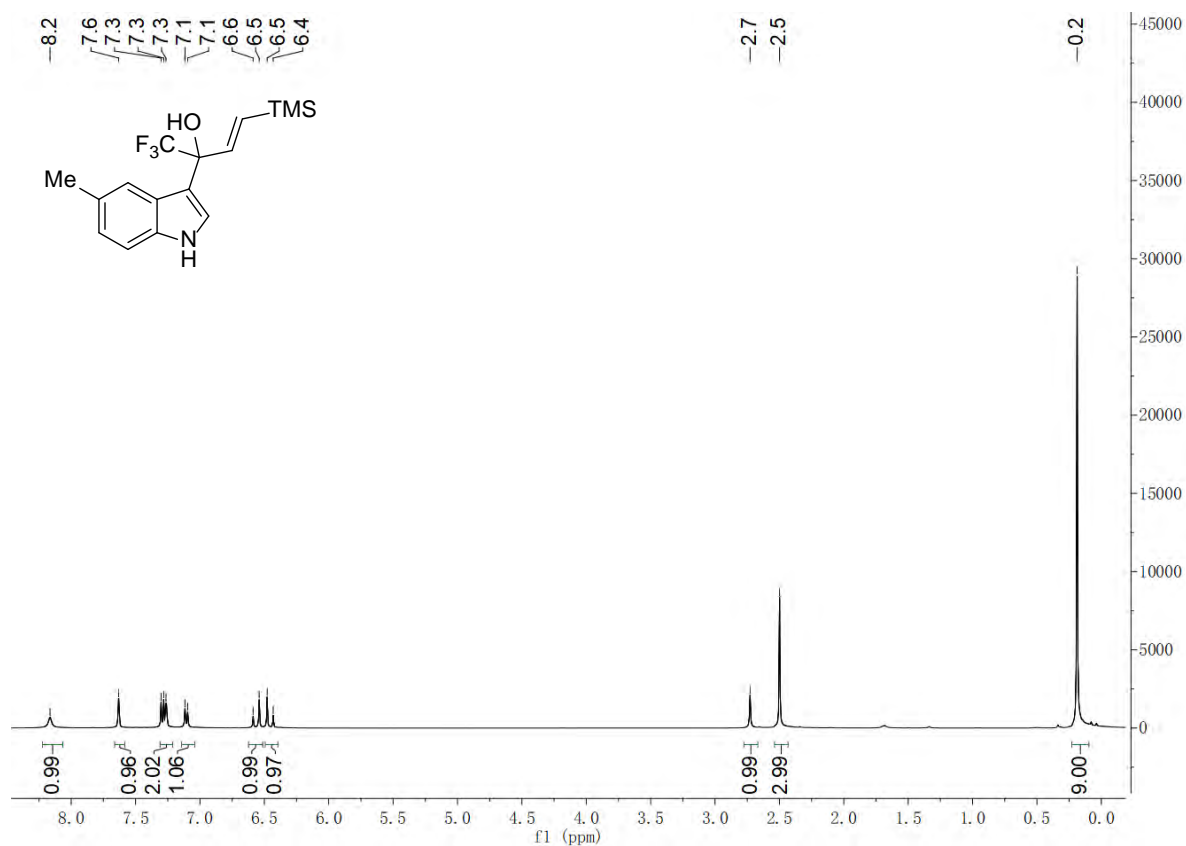

### <sup>13</sup>C NMR of compound 1w (in CDCl<sub>3</sub>)

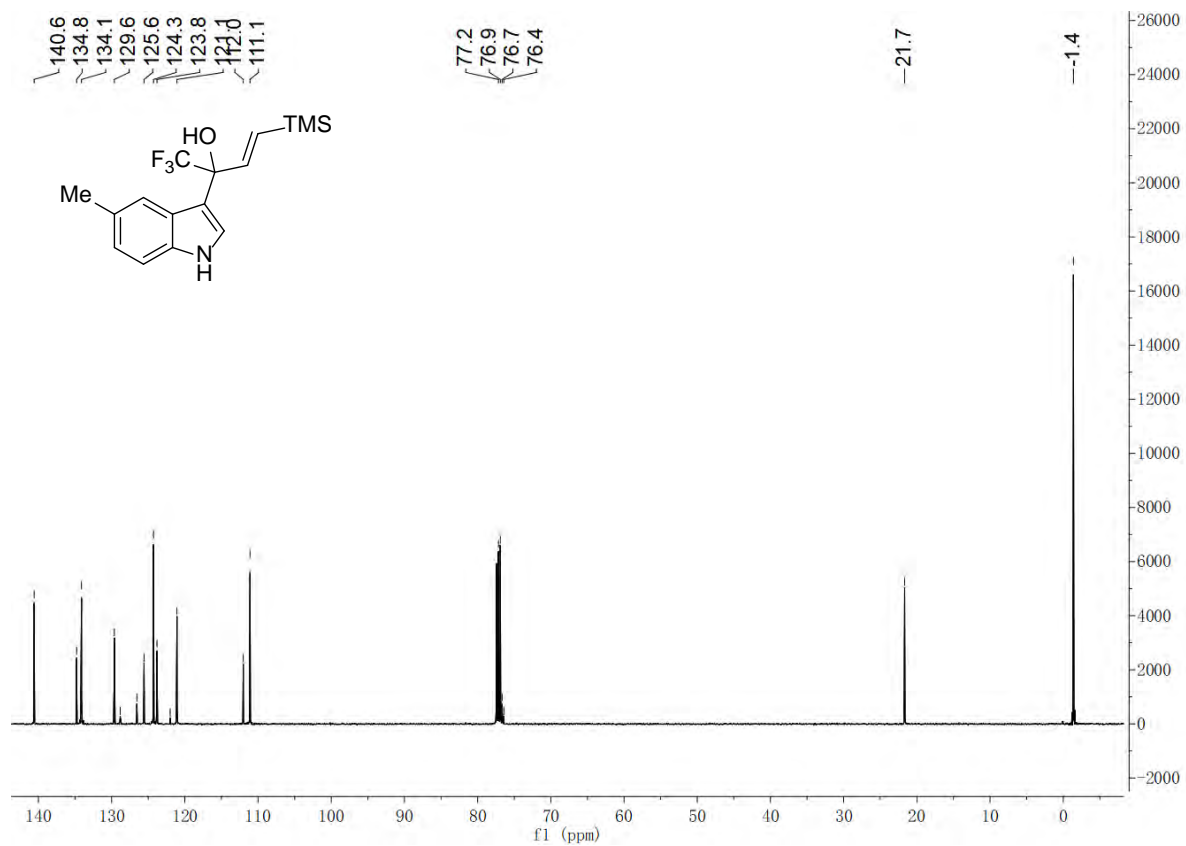

**<sup>19</sup>F NMR of compound 1w (in CDCl<sub>3</sub>)**

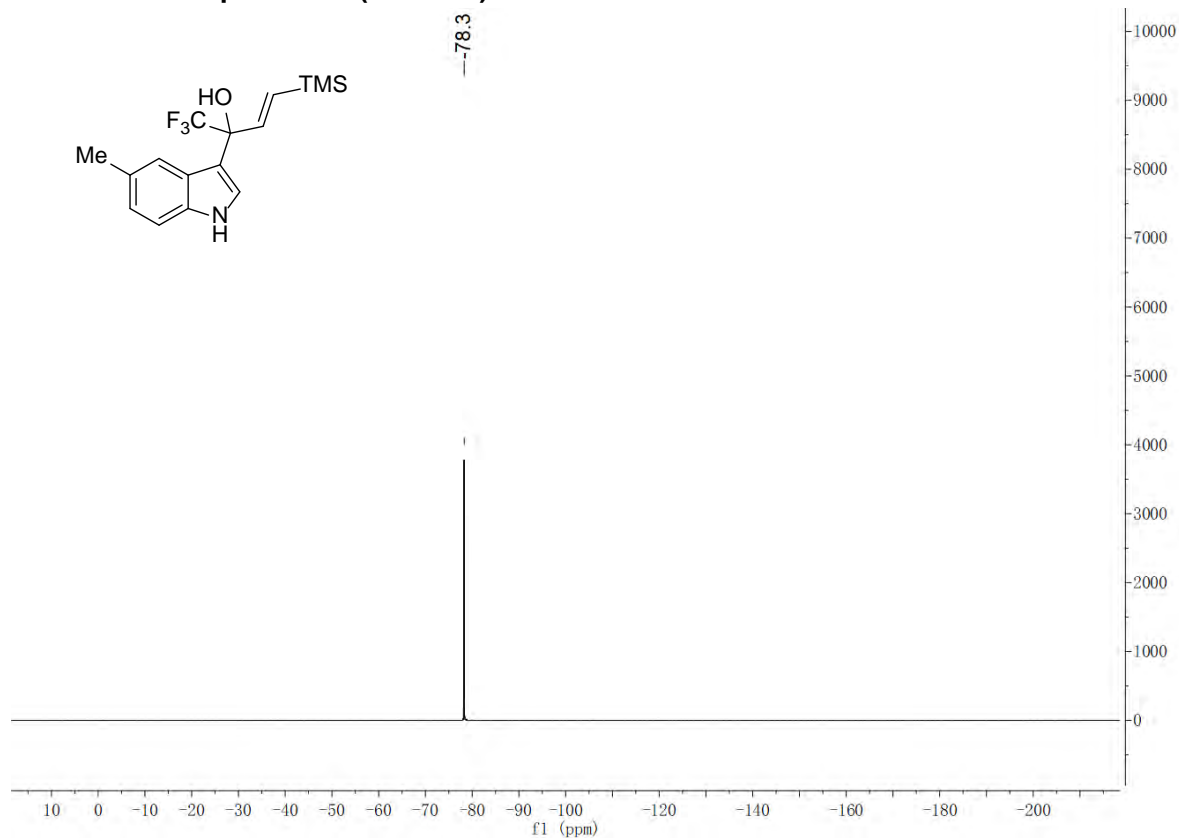

**<sup>1</sup>H NMR of compound 1x (in CDCl<sub>3</sub>)**

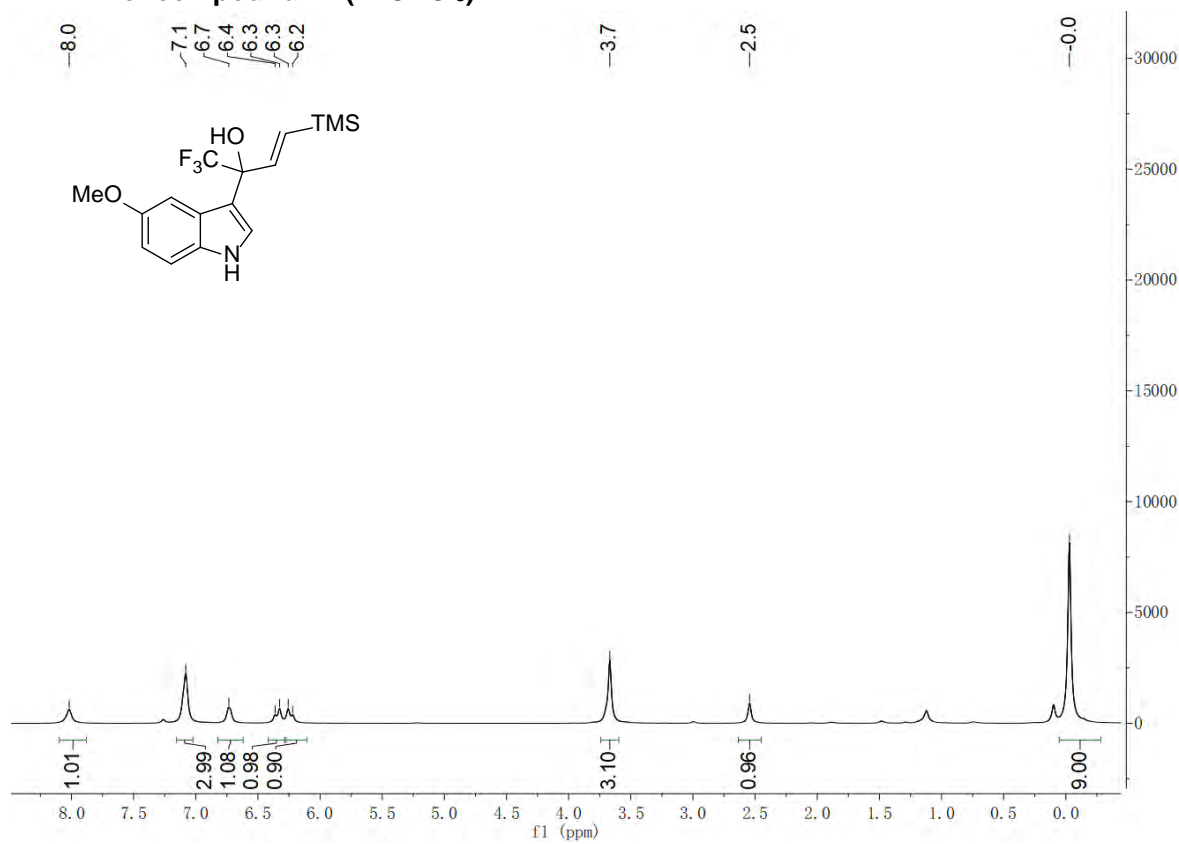

**<sup>13</sup>C NMR of compound 1x (in CDCl<sub>3</sub>)**

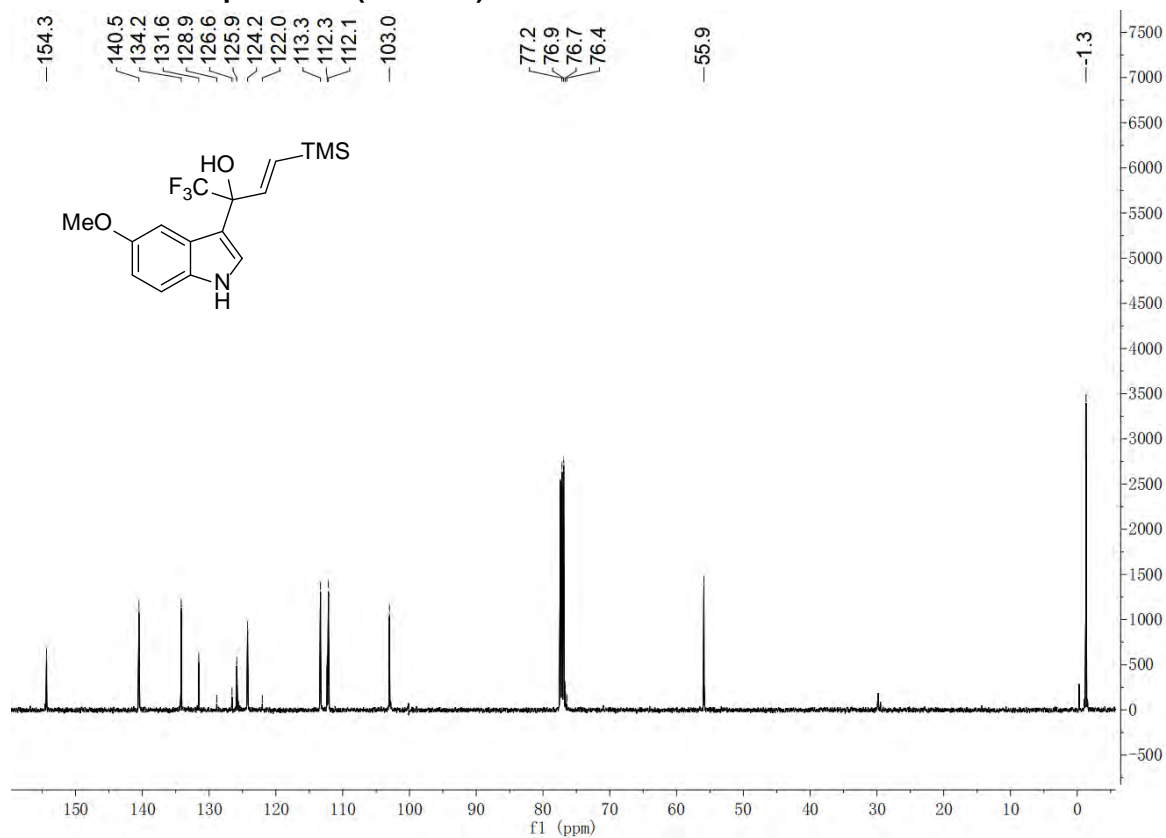

**<sup>19</sup>F NMR of compound 1x (in CDCl<sub>3</sub>)**

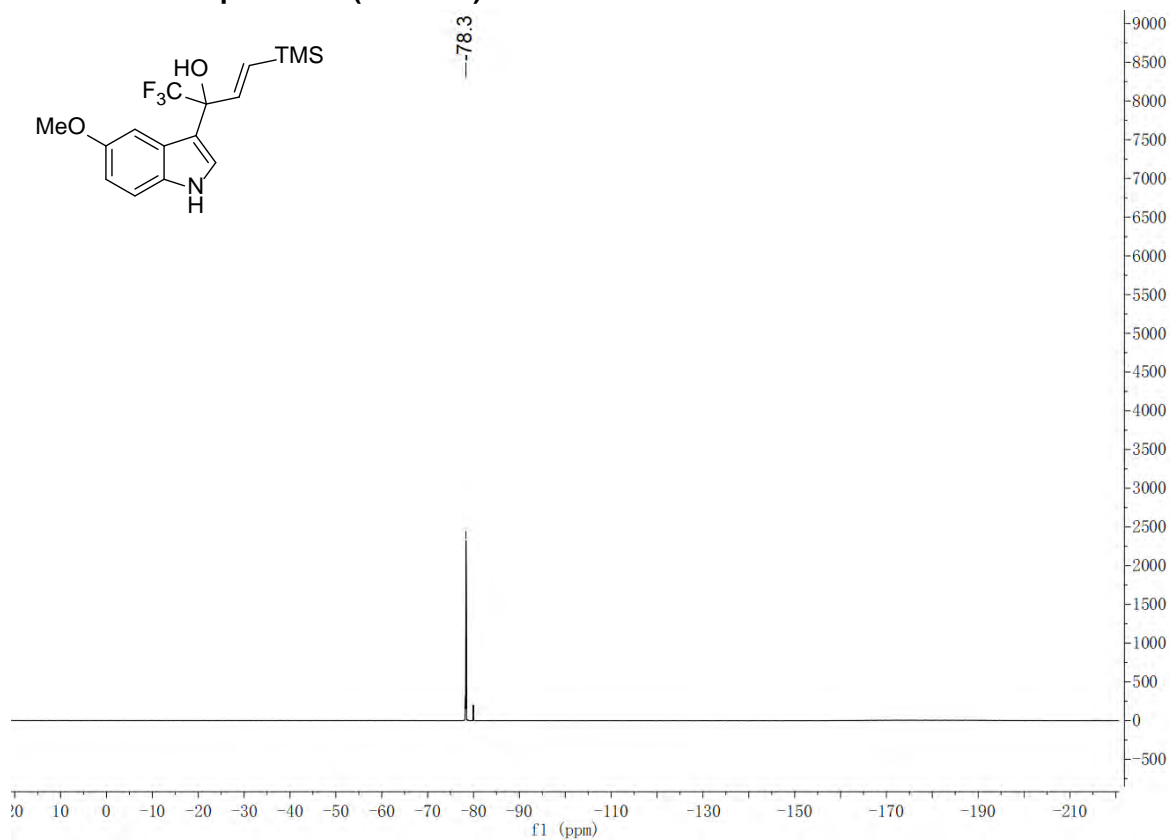

### <sup>1</sup>H NMR of compound 1y (in CDCl<sub>3</sub>)

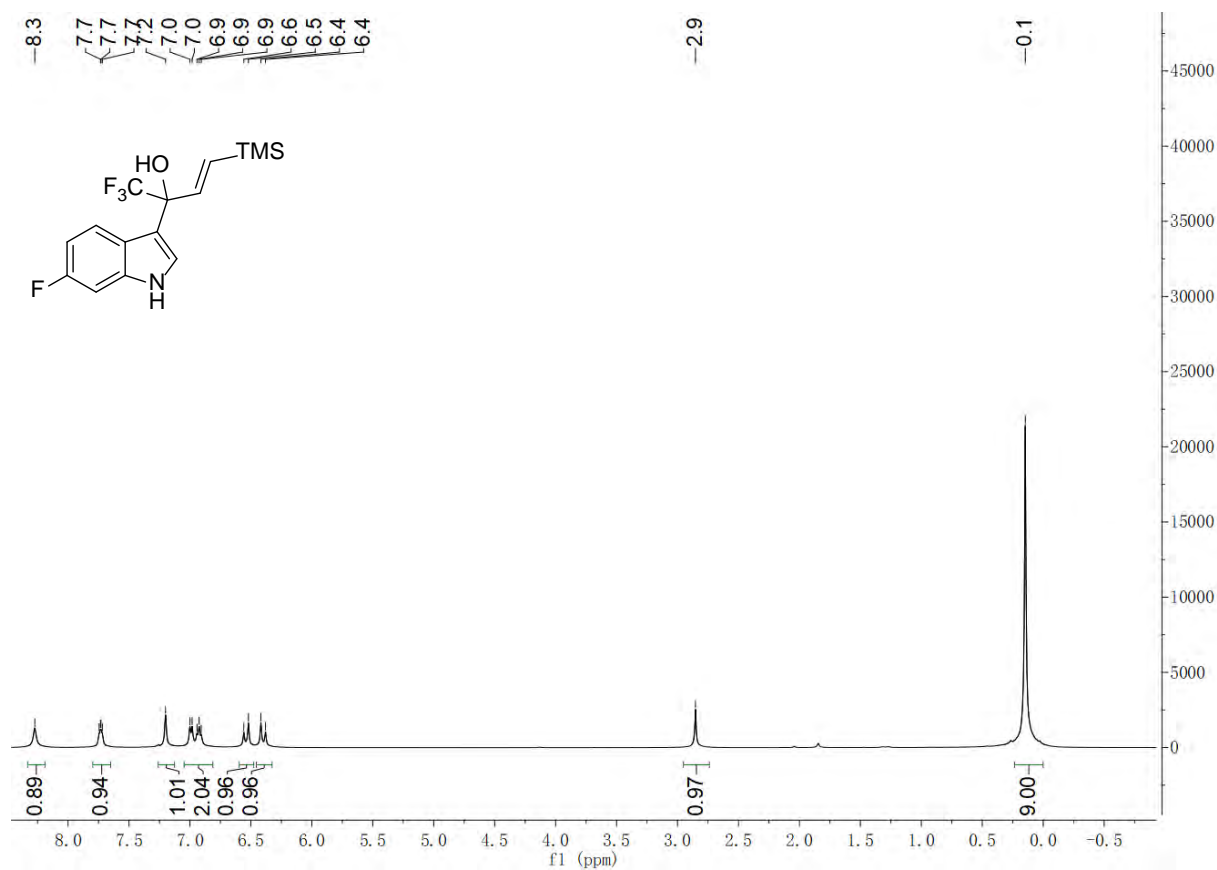

### <sup>13</sup>C NMR of compound 1y (in CDCl<sub>3</sub>)

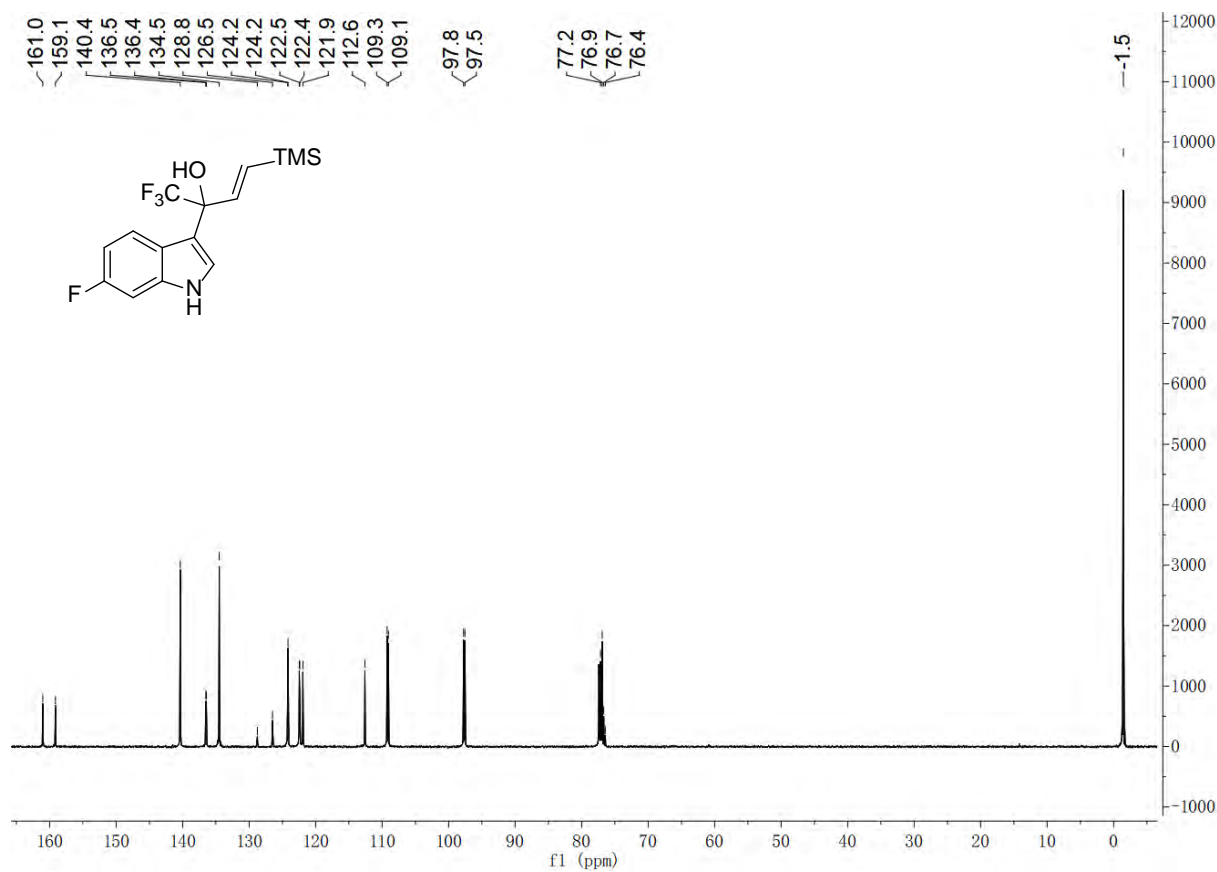

**<sup>19</sup>F NMR of compound 1y (in CDCl<sub>3</sub>)**

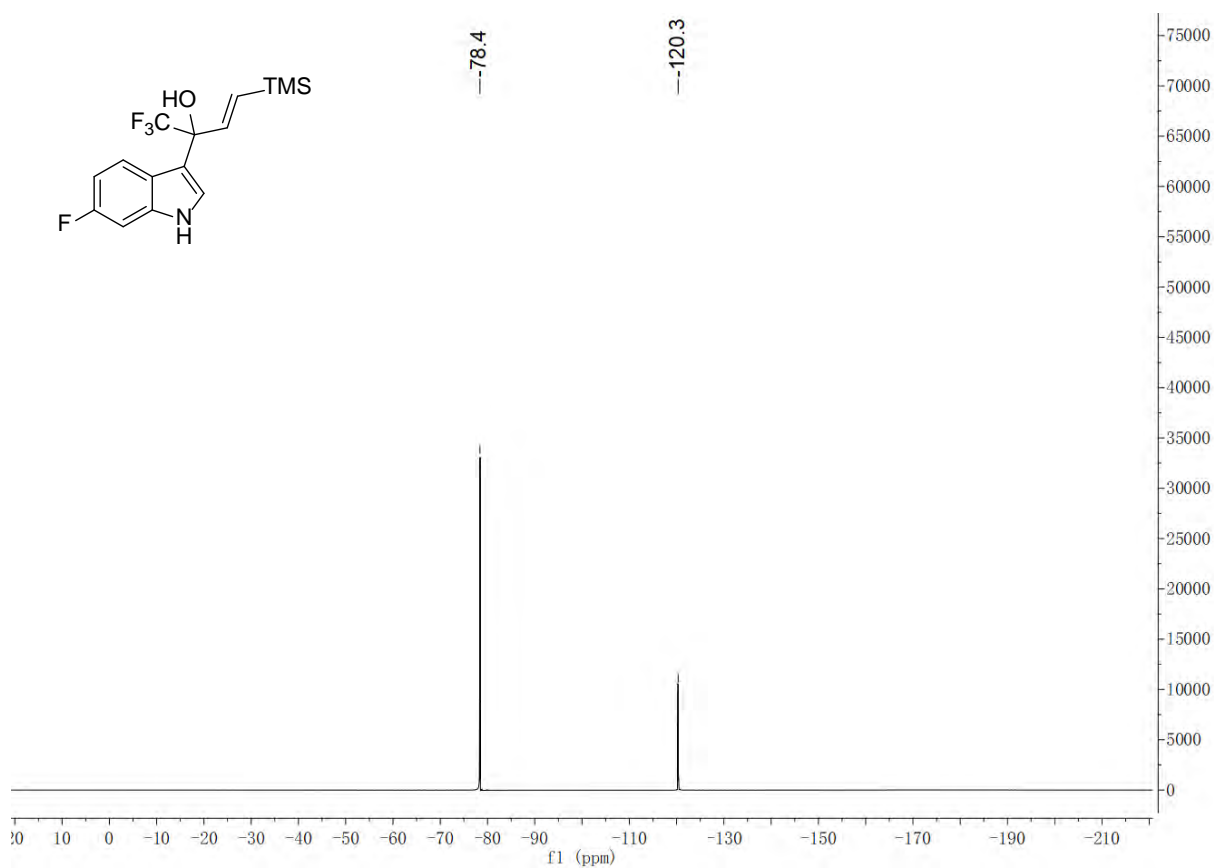

**<sup>1</sup>H NMR of compound 1z (in CDCl<sub>3</sub>)**

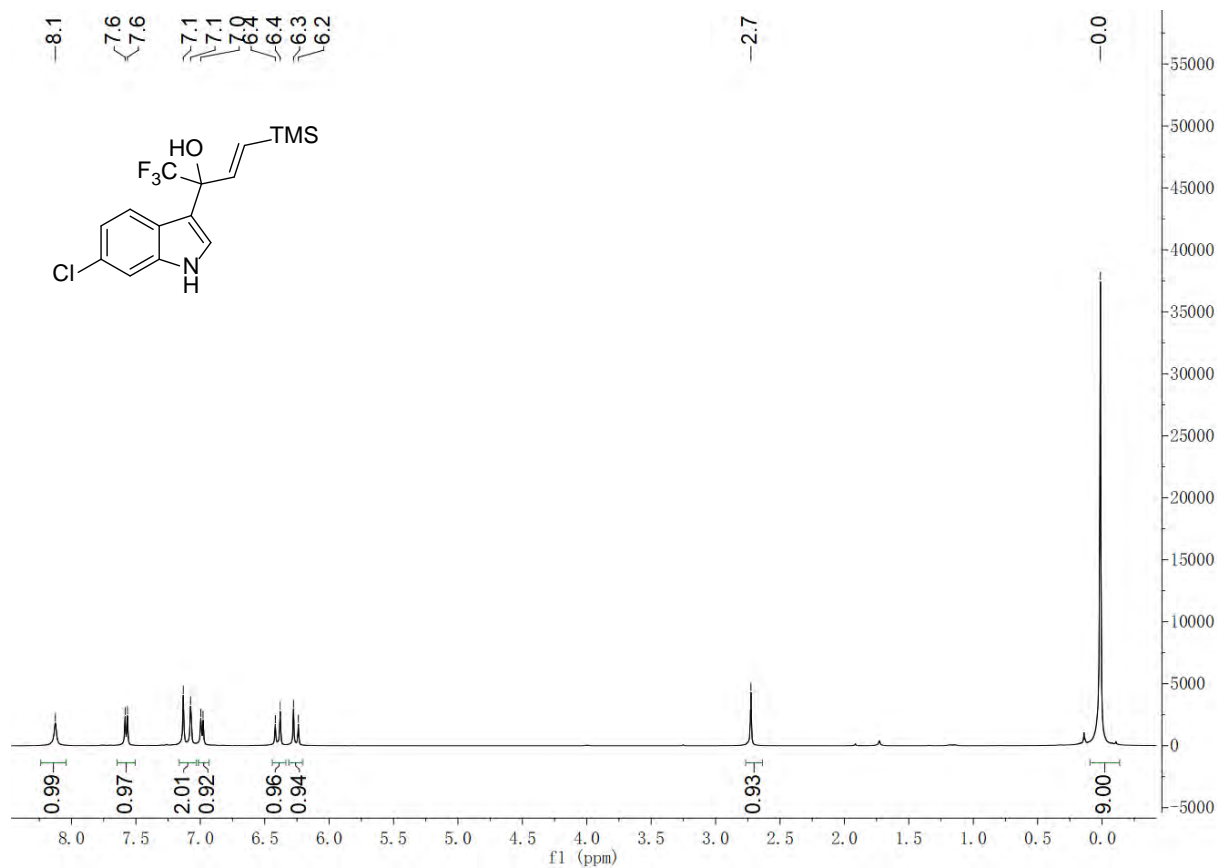

### <sup>13</sup>C NMR of compound 1z (in CDCl<sub>3</sub>)

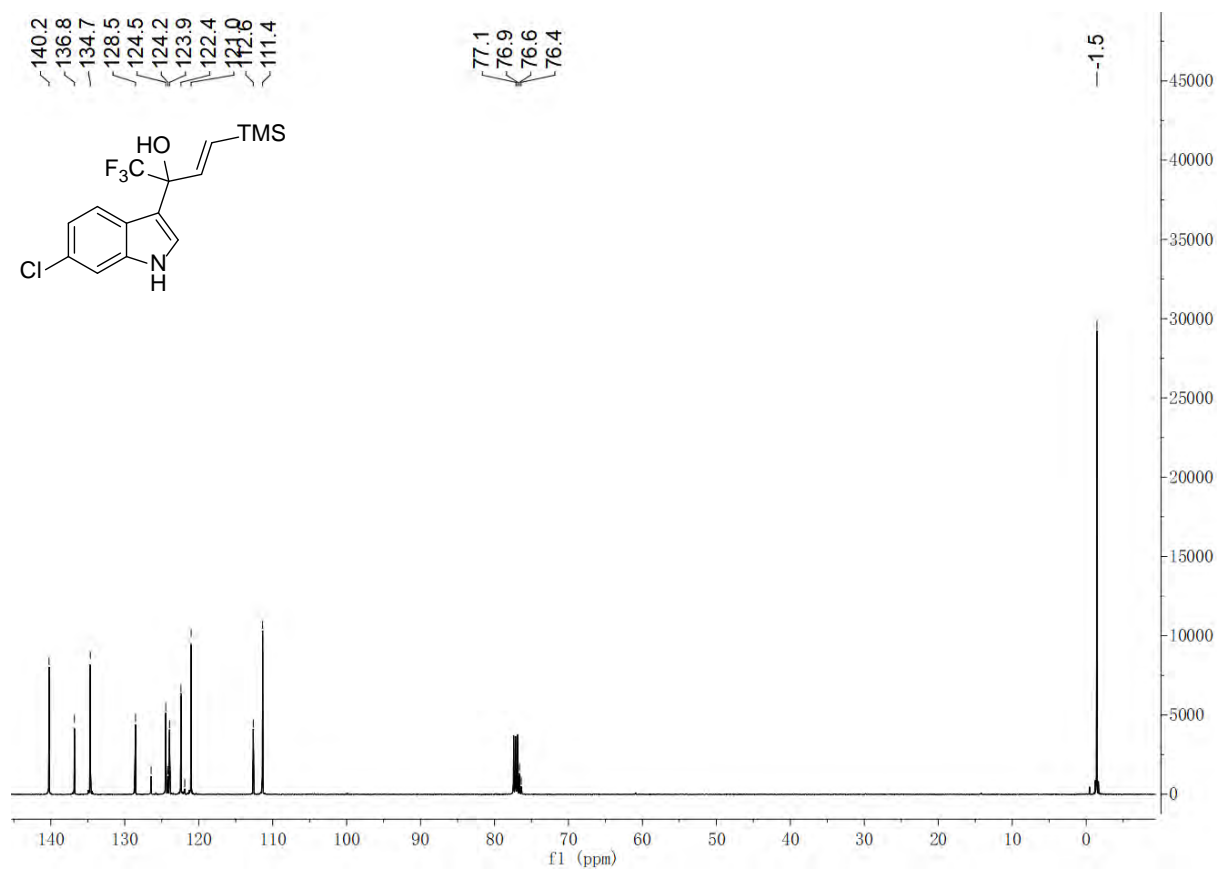

### <sup>19</sup>F NMR of compound 1z (in CDCl<sub>3</sub>)

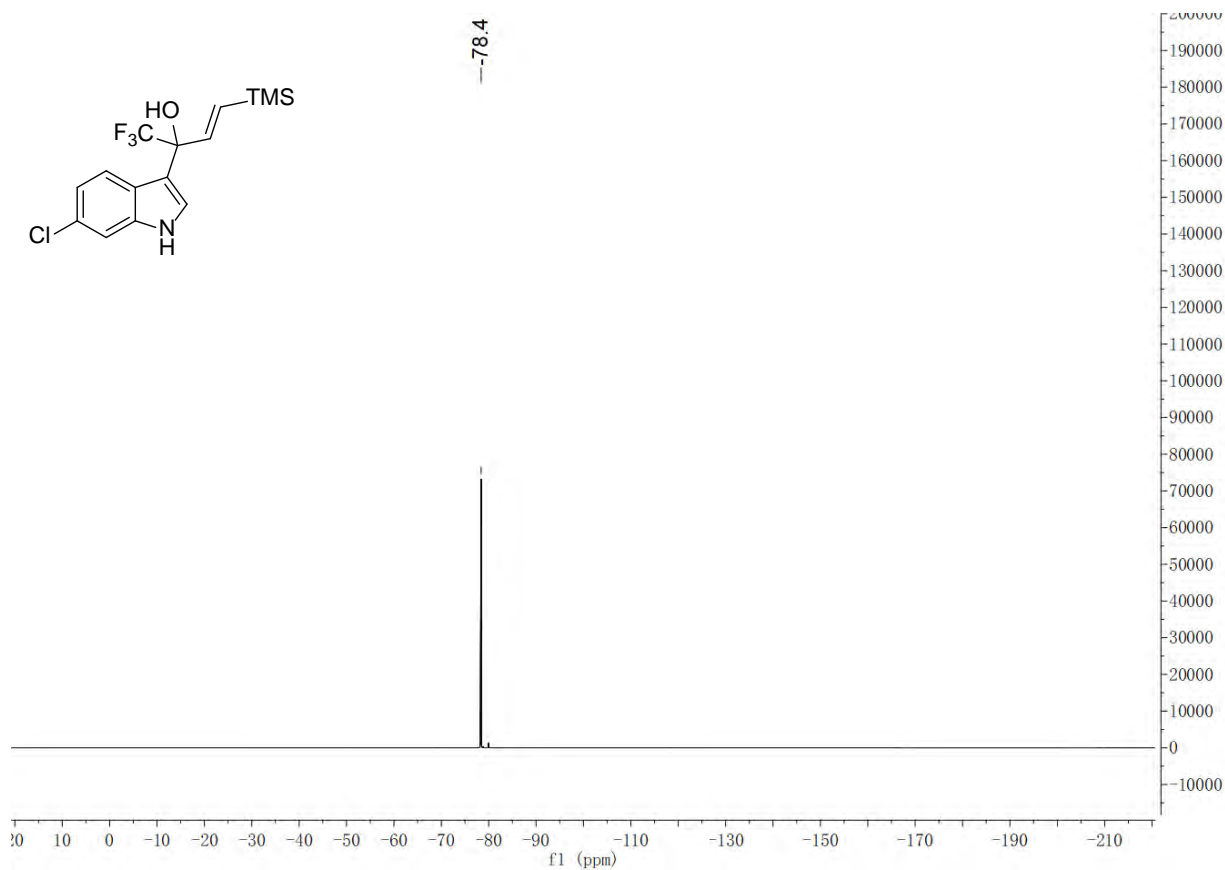

### <sup>1</sup>H NMR of compound 1aa (in DMSO-d<sub>6</sub>)

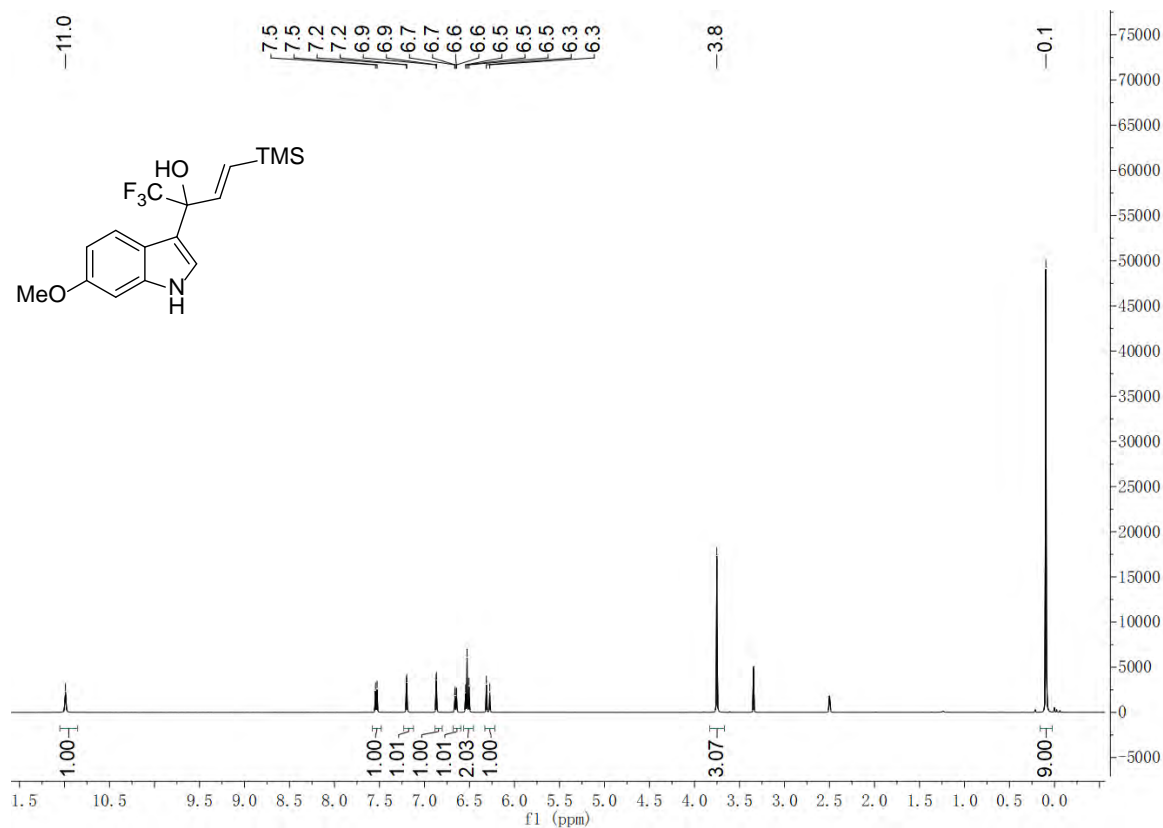

### <sup>13</sup>C NMR of compound 1aa (in DMSO-d<sub>6</sub>)

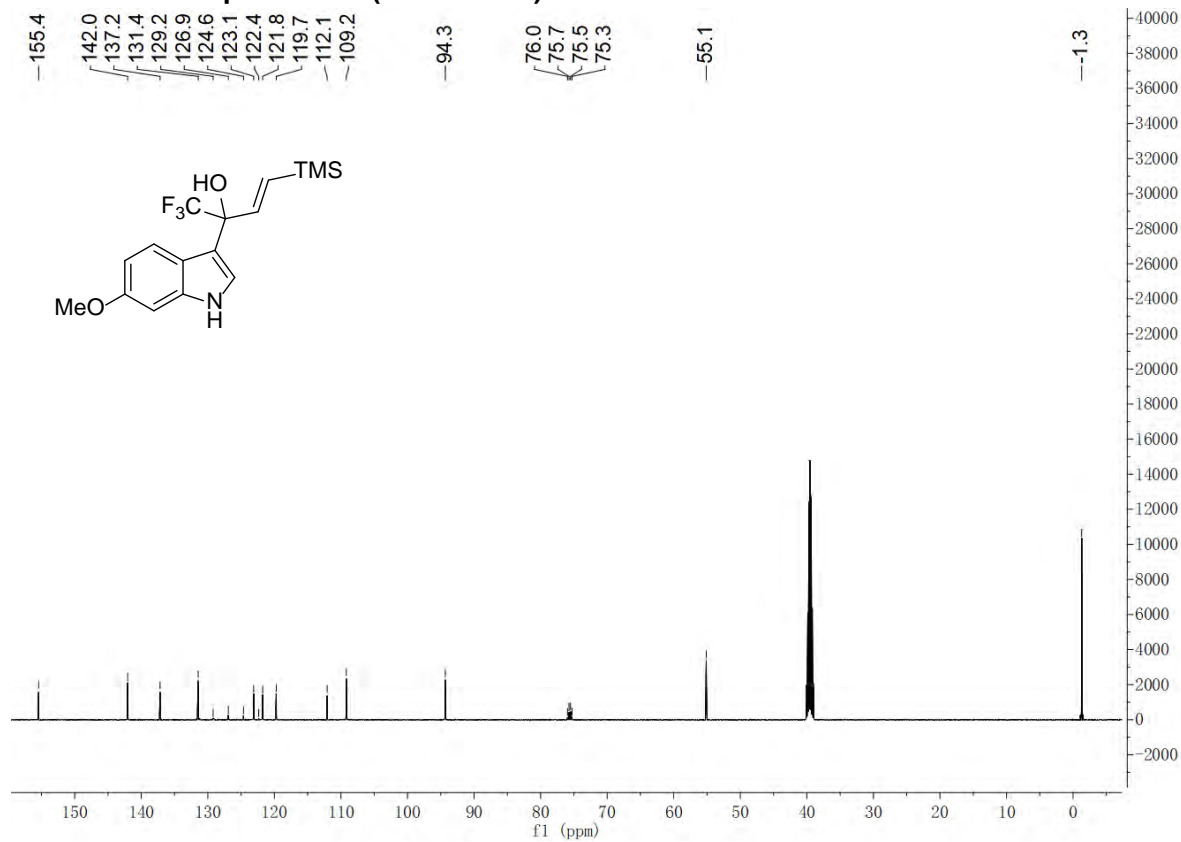



**<sup>19</sup>F NMR of compound 1aa (in DMSO-d<sub>6</sub>)**

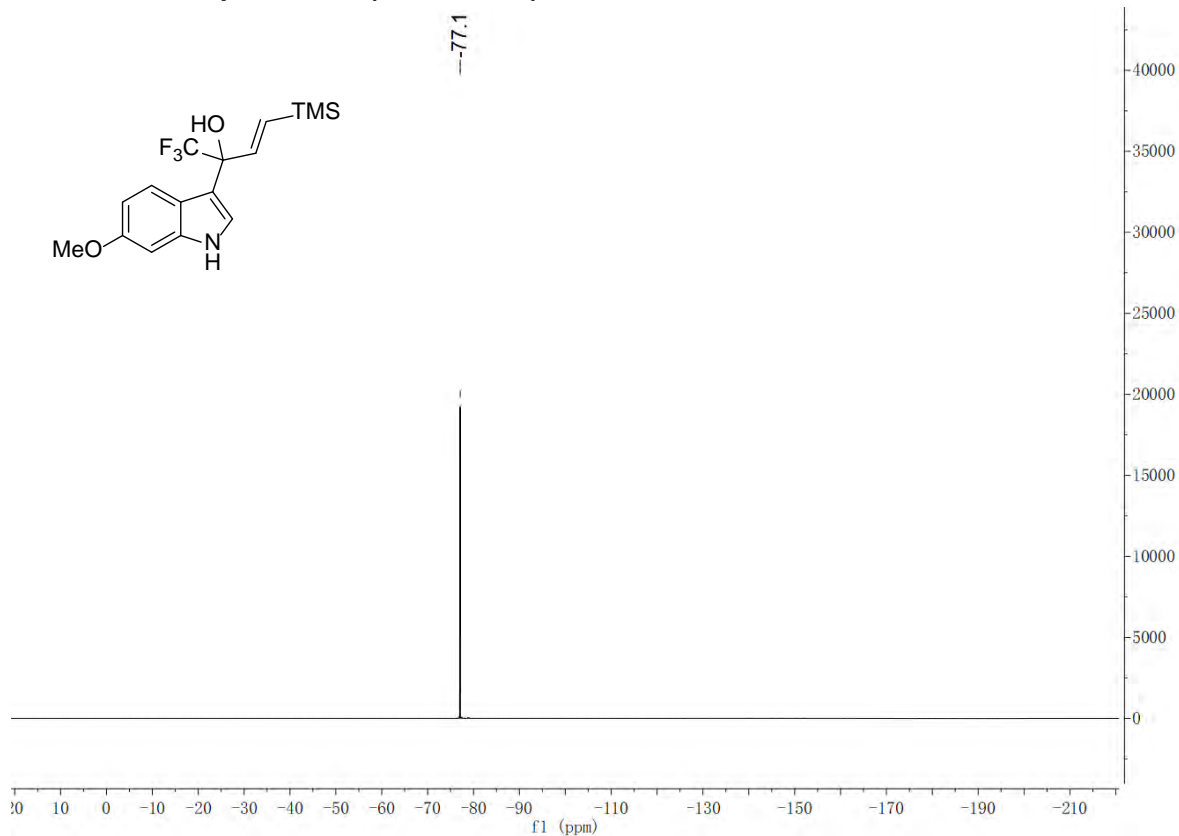

**<sup>1</sup>H NMR of compound 1ab (in DMSO-d<sub>6</sub>)**

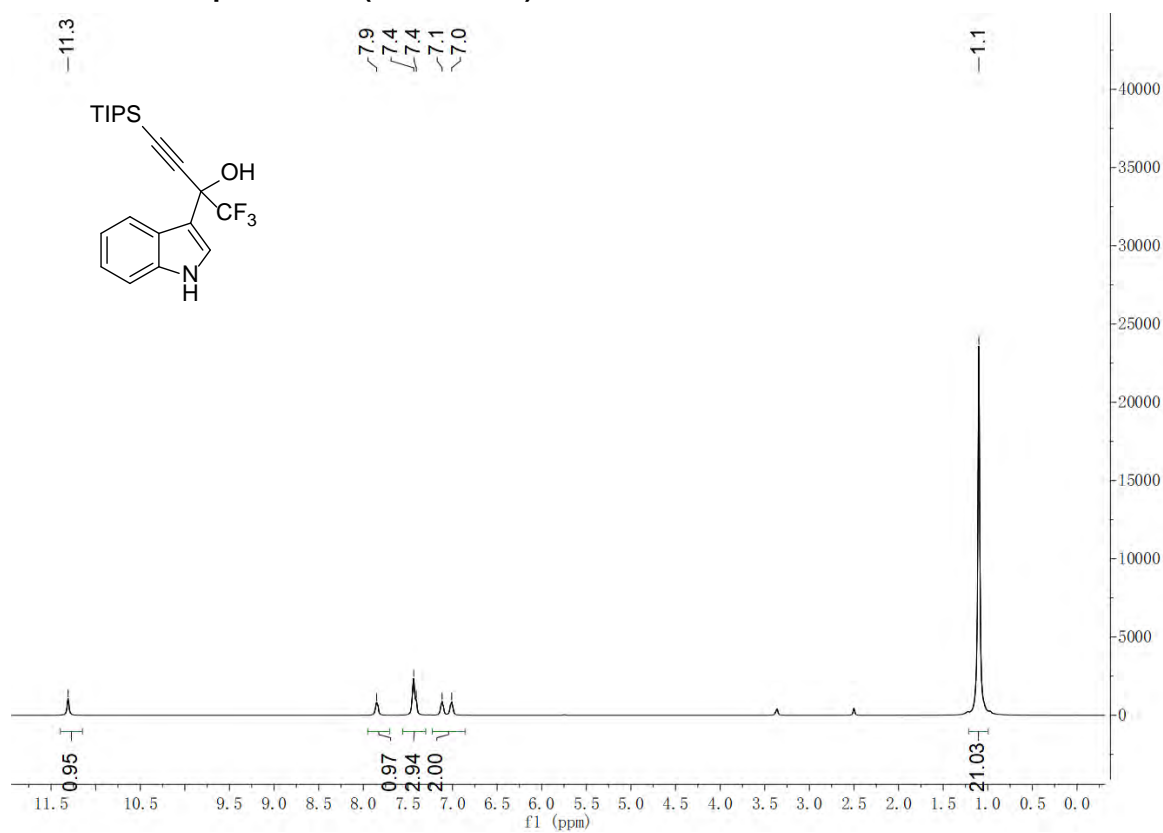

**<sup>13</sup>C NMR of compound 1ab (in DMSO-d<sub>6</sub>)**

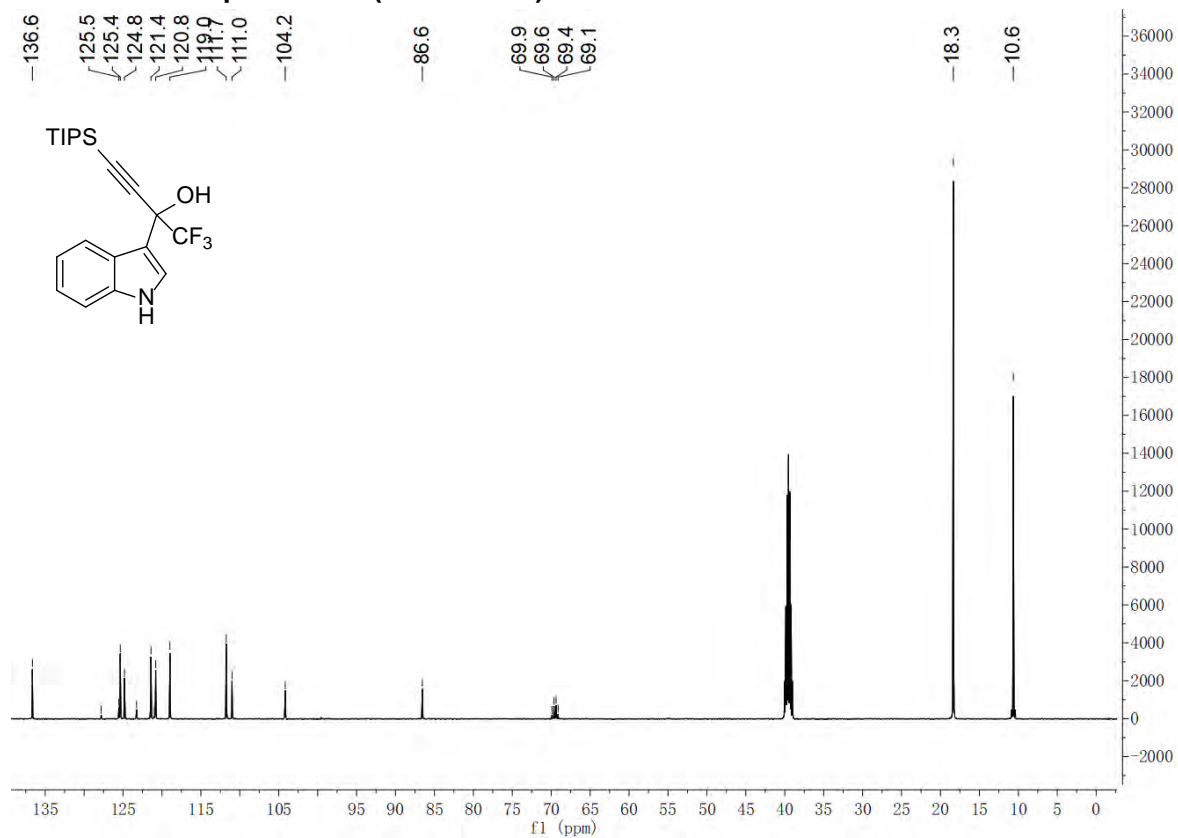

**<sup>19</sup>F NMR of compound 1ab (in DMSO-d<sub>6</sub>)**

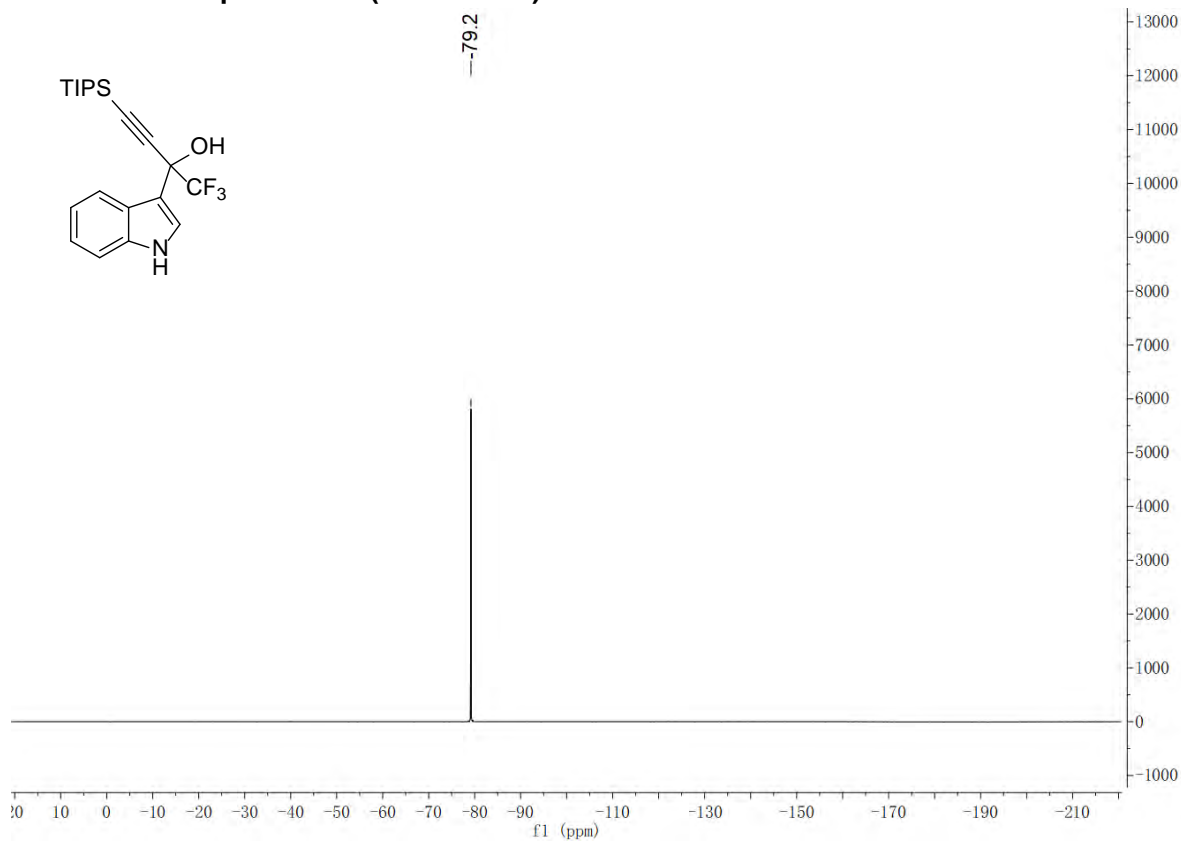

### <sup>1</sup>H NMR of compound 1ac (in CDCl<sub>3</sub>)

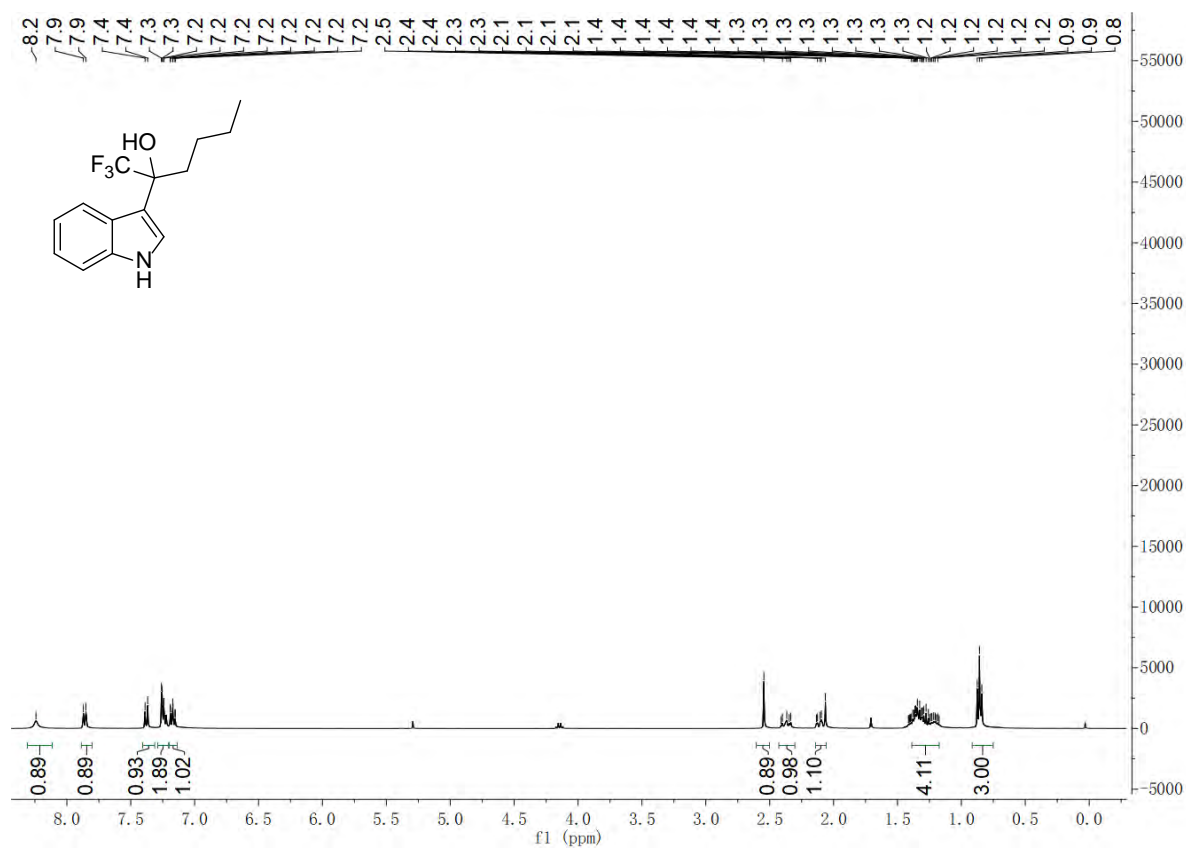

### <sup>13</sup>C NMR of compound 1ac (in CDCl<sub>3</sub>)

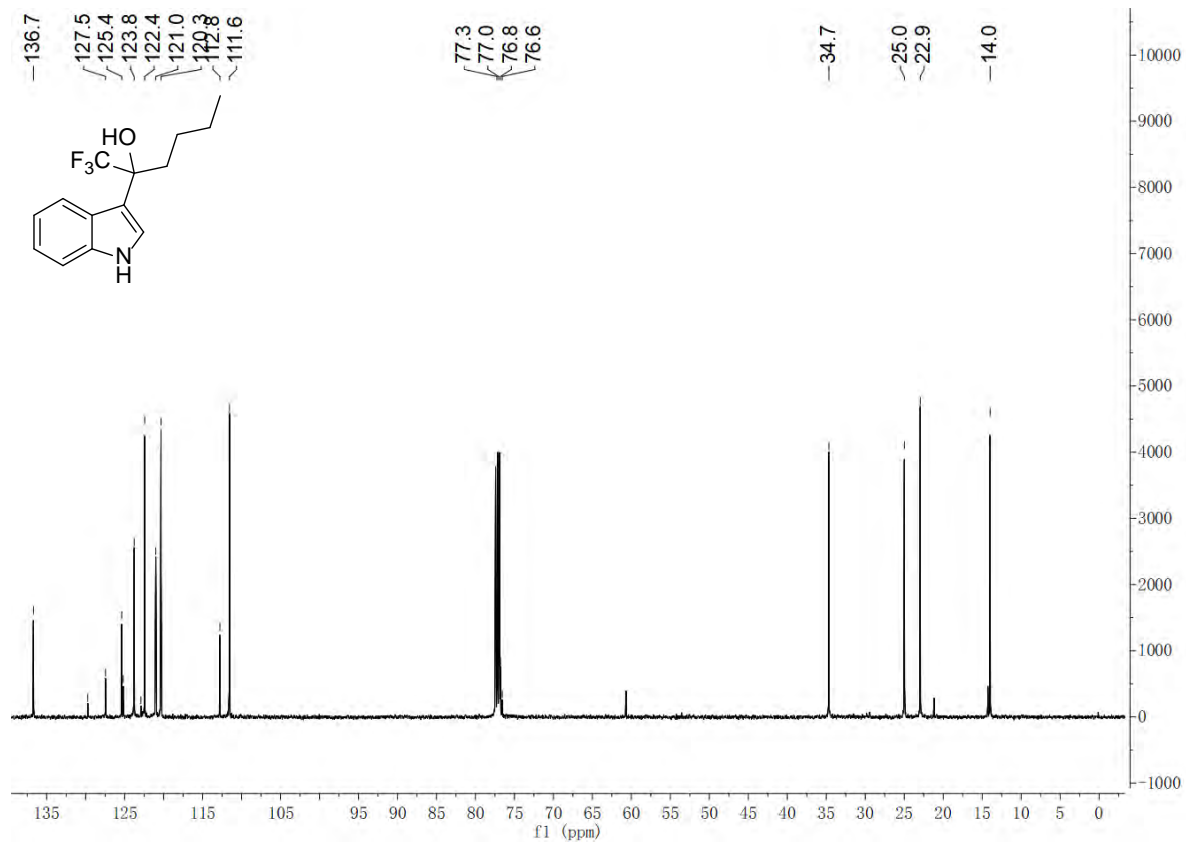

**<sup>19</sup>F NMR of compound 1ac (in CDCl<sub>3</sub>)**

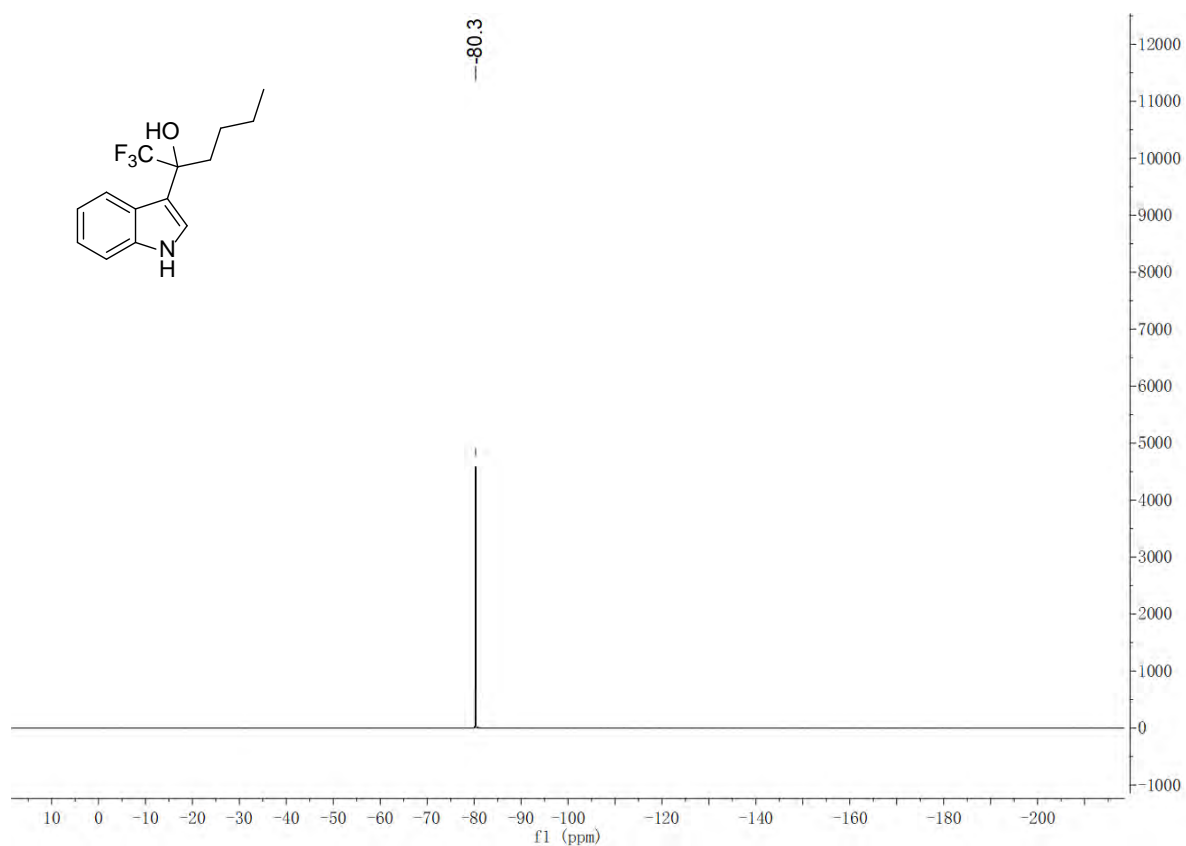

**<sup>1</sup>H NMR of compound 1ad (in CDCl<sub>3</sub>)**

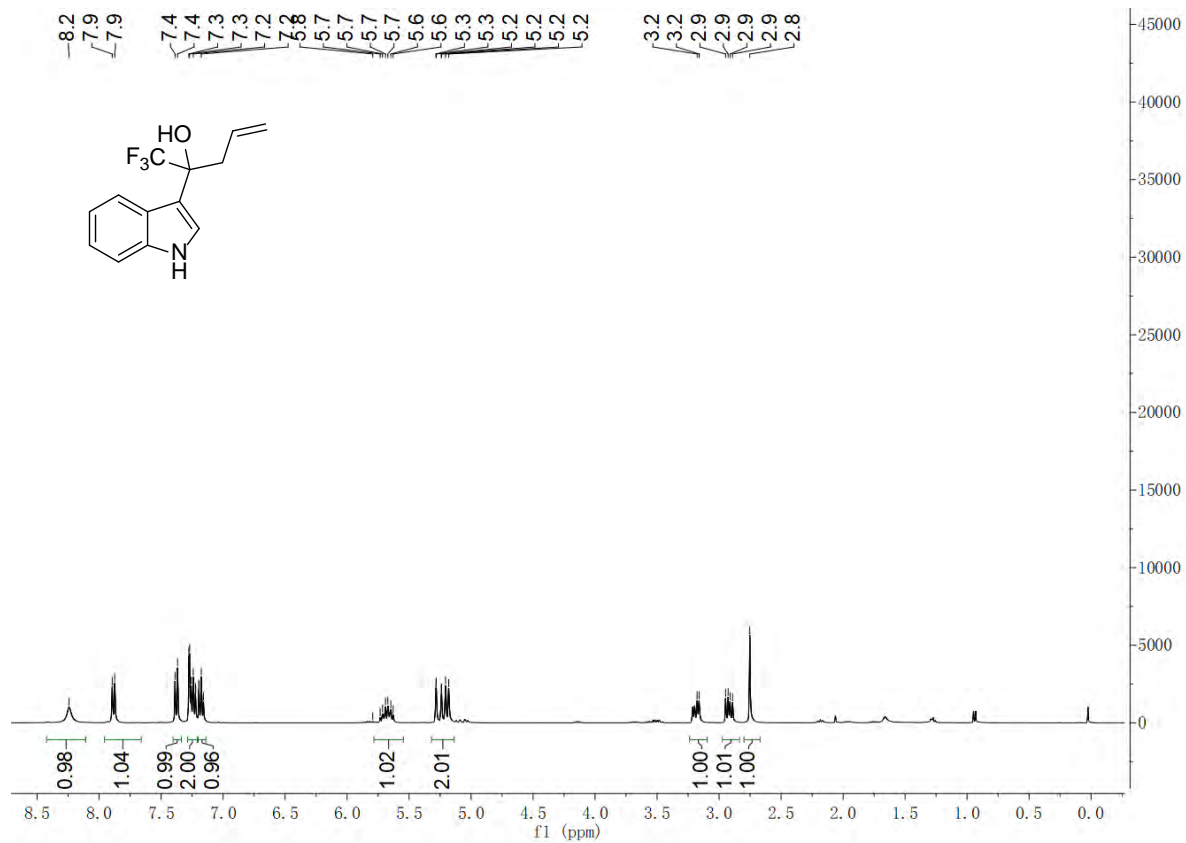

### <sup>13</sup>C NMR of compound 1ad (in CDCl<sub>3</sub>)

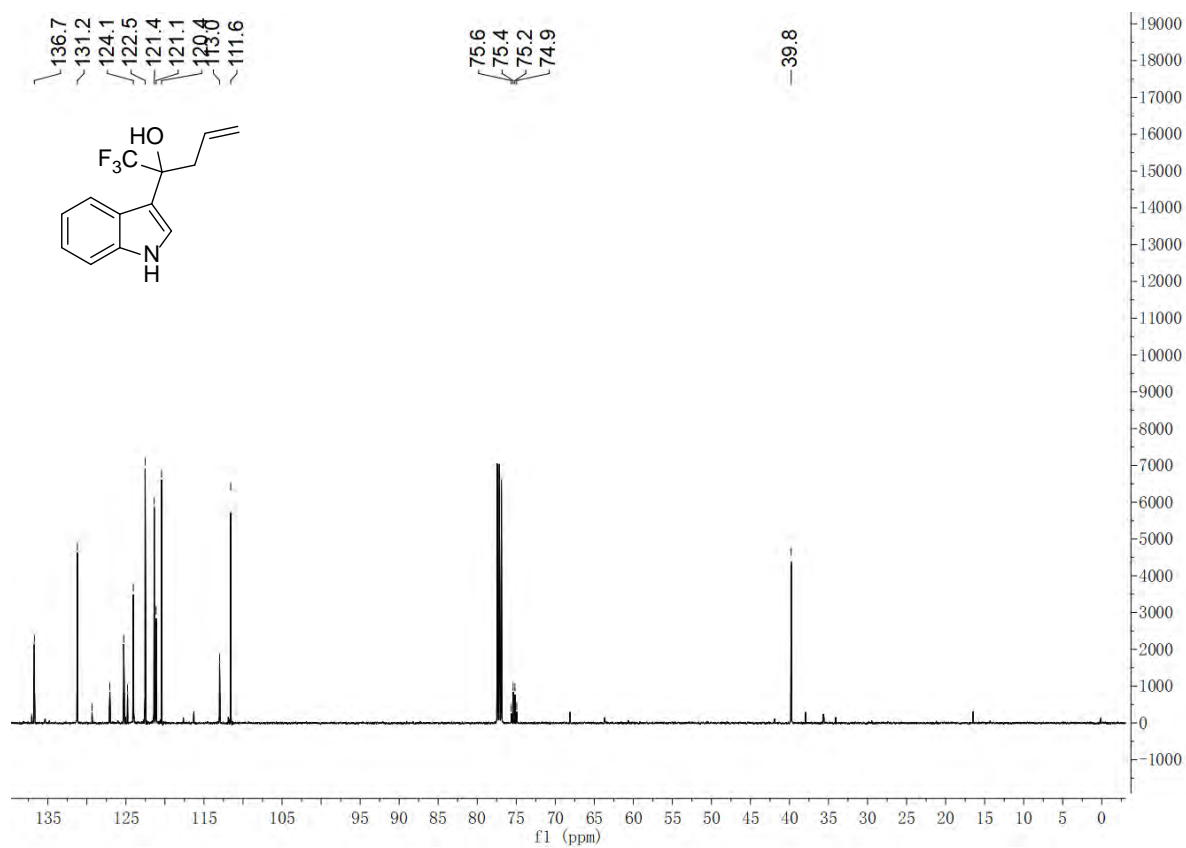

### <sup>19</sup>F NMR of compound 1ad (in CDCl<sub>3</sub>)

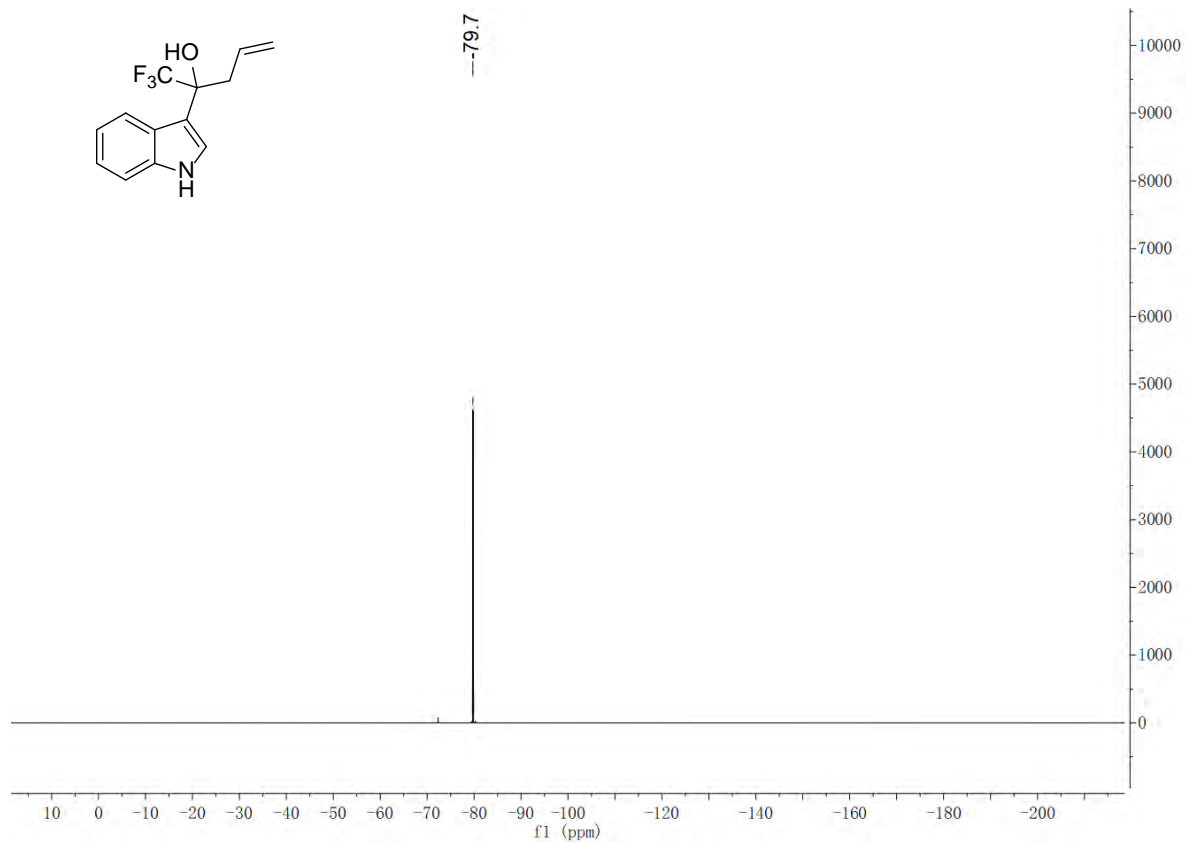

### <sup>1</sup>H NMR of compound 1ae (in CDCl<sub>3</sub>)

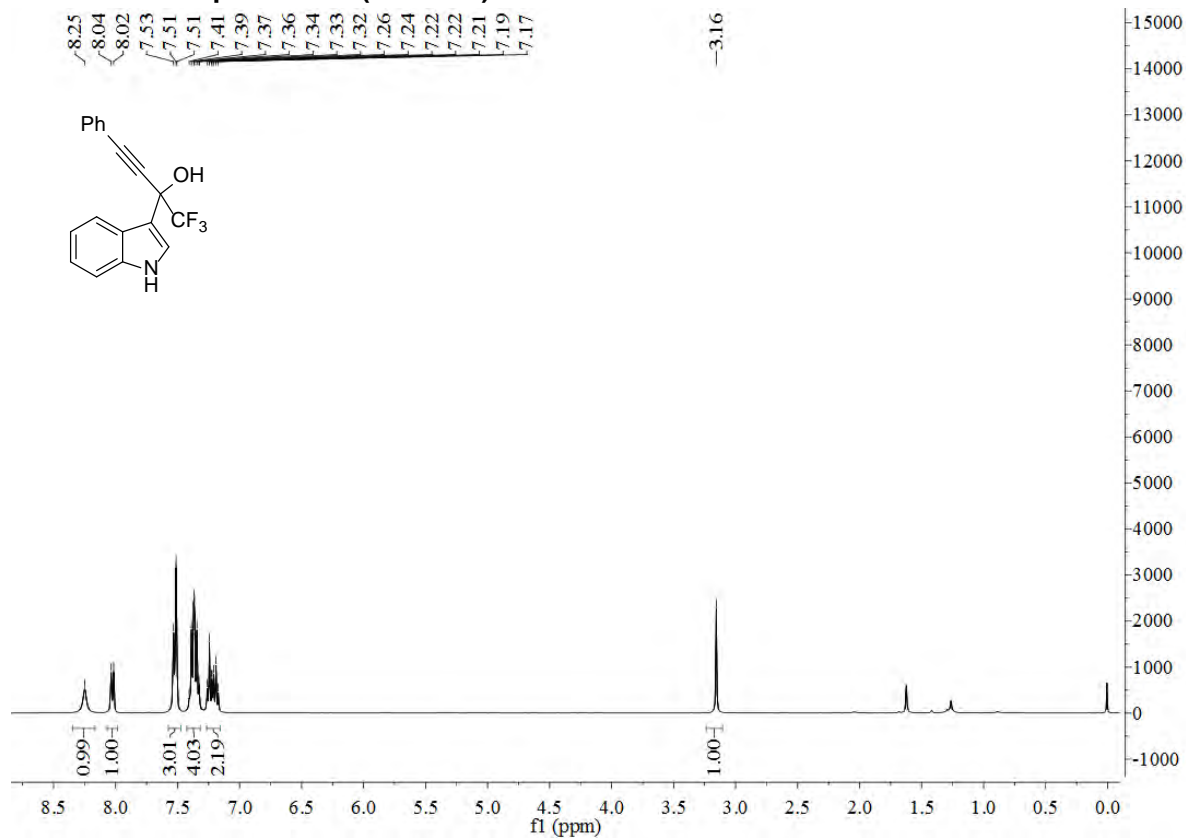

### <sup>13</sup>C NMR of compound 1ae (in CDCl<sub>3</sub>)

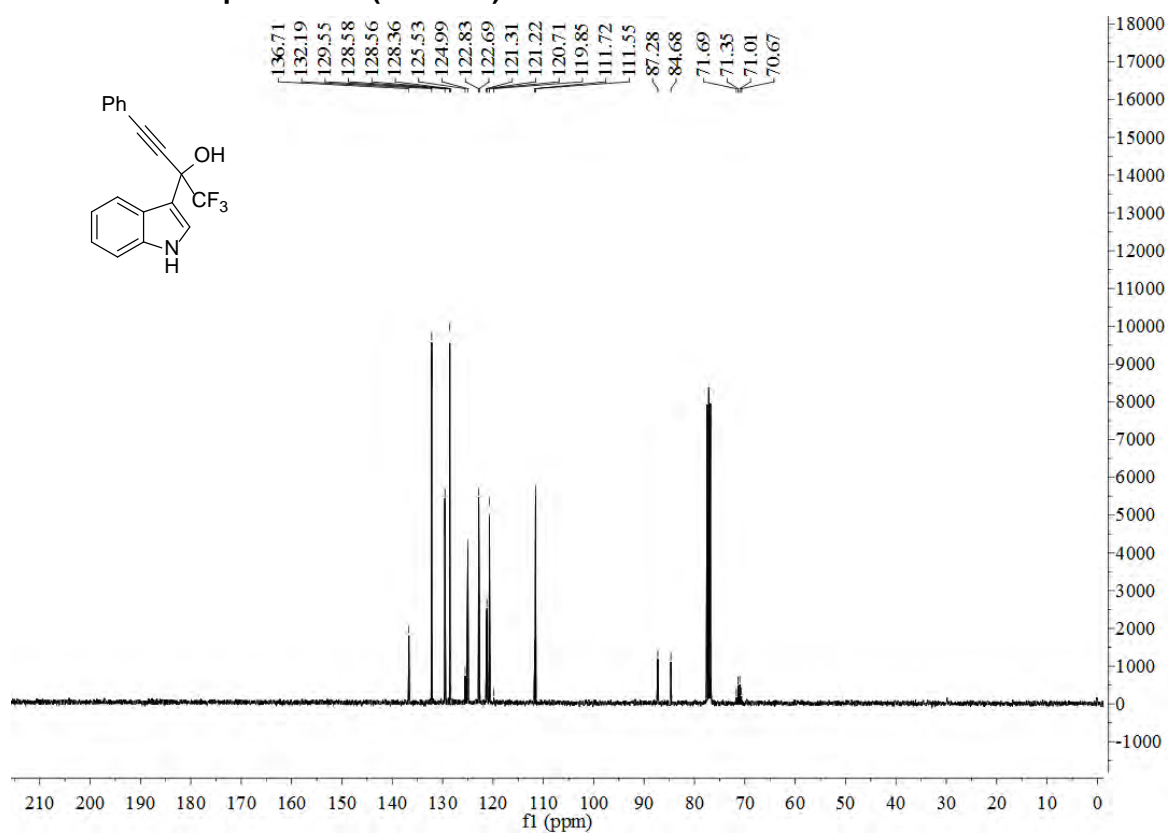

**<sup>19</sup>F NMR of compound 1ae (in CDCl<sub>3</sub>)**

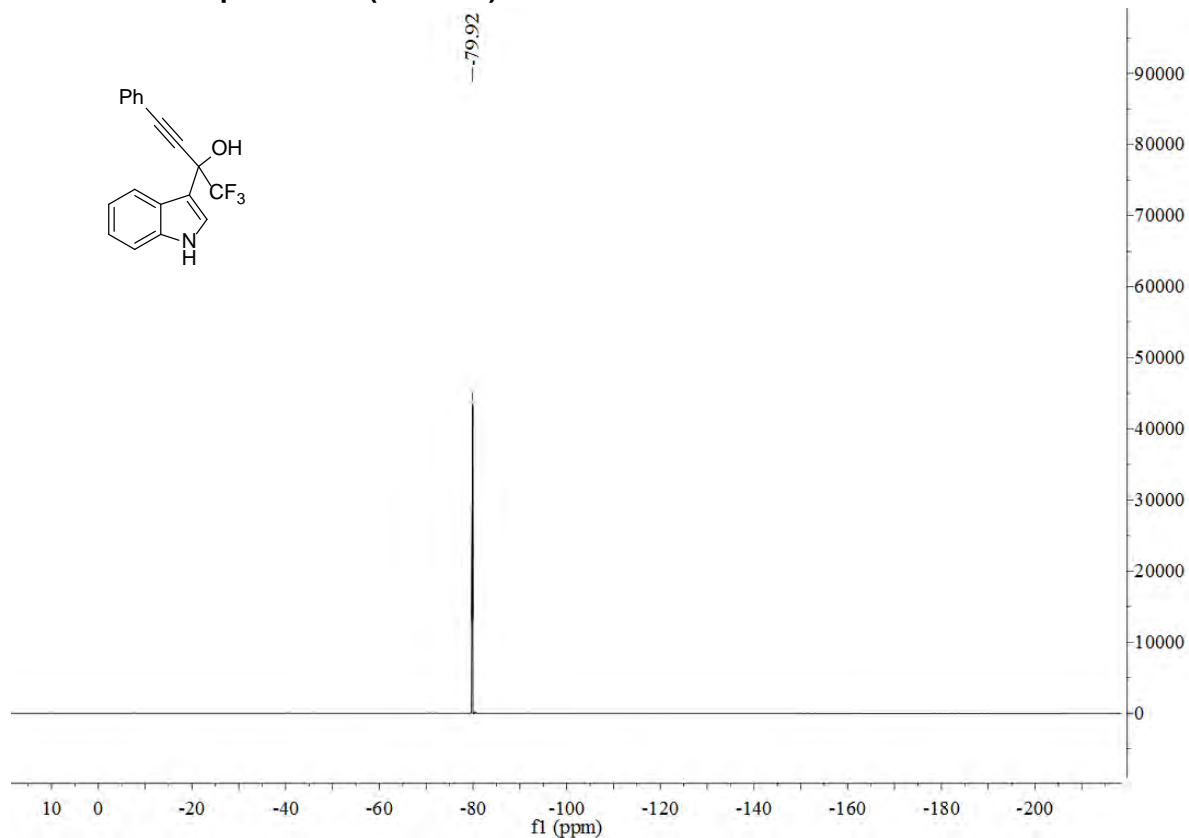

**<sup>1</sup>H NMR of compound 1af (in DMSO-d<sub>6</sub>)**

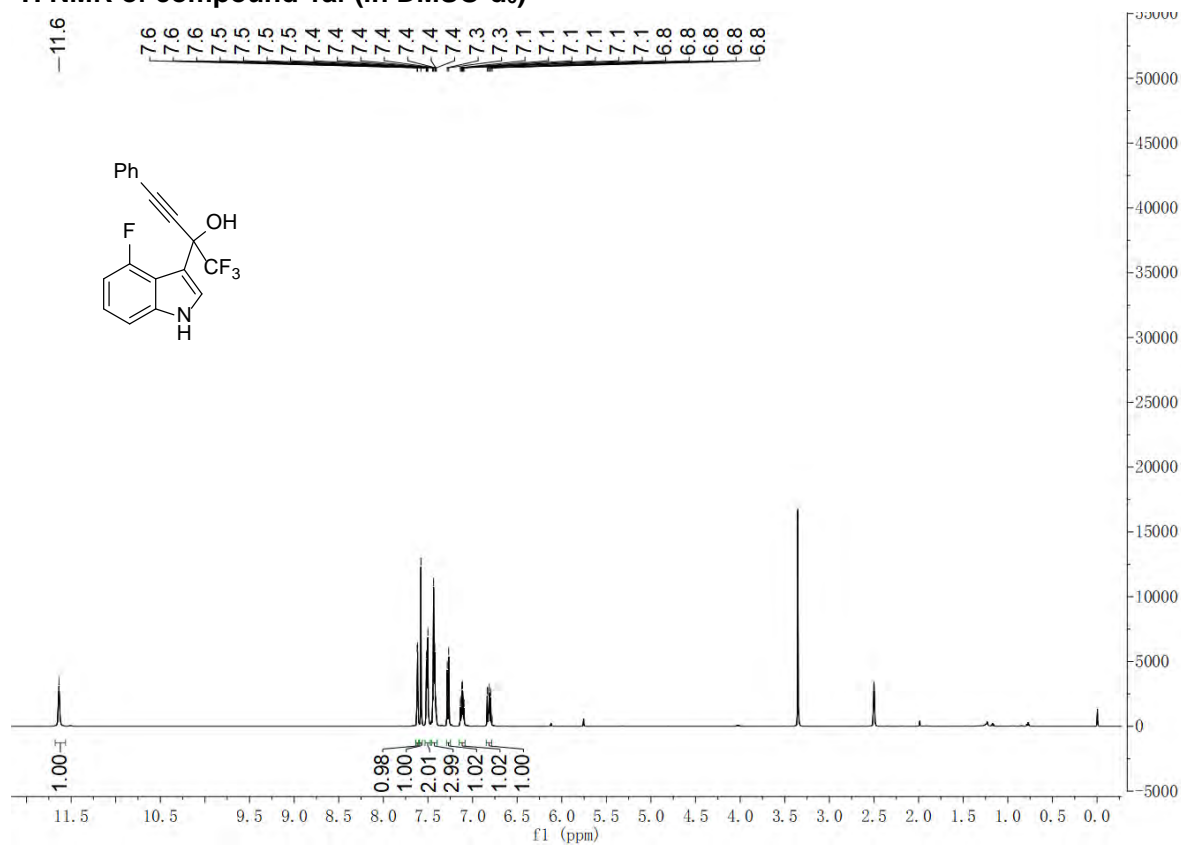

### <sup>13</sup>C NMR of compound 1af (in DMSO-d<sub>6</sub>)

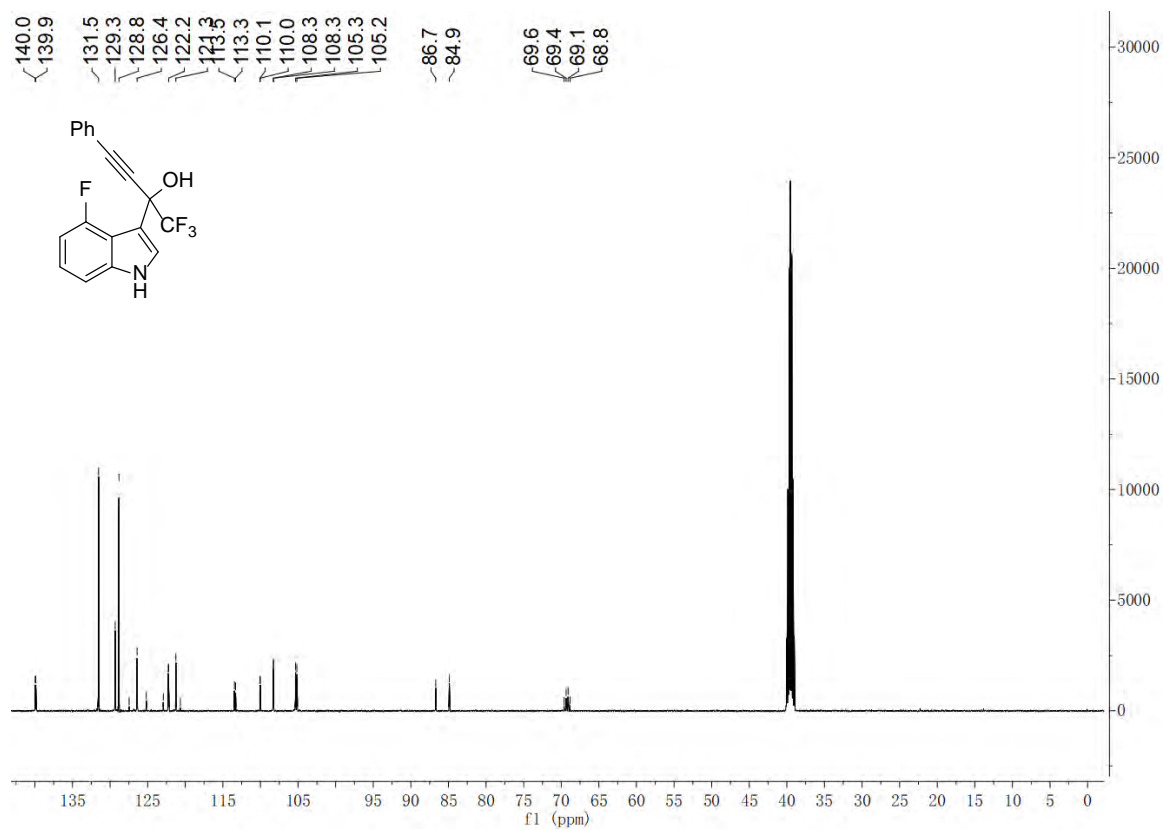

### <sup>19</sup>F NMR of compound 1af (in DMSO-d<sub>6</sub>)

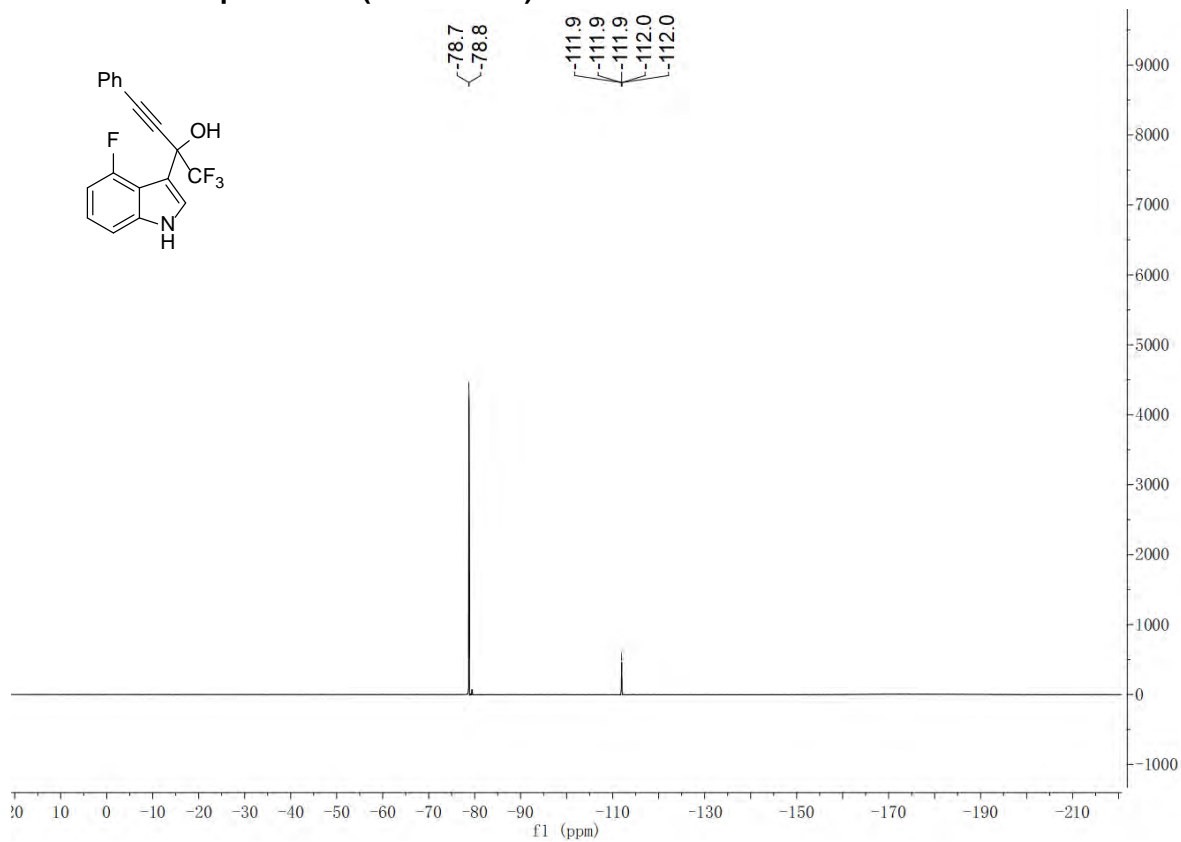



### <sup>1</sup>H NMR of compound 1ag (in DMSO-d<sub>6</sub>)

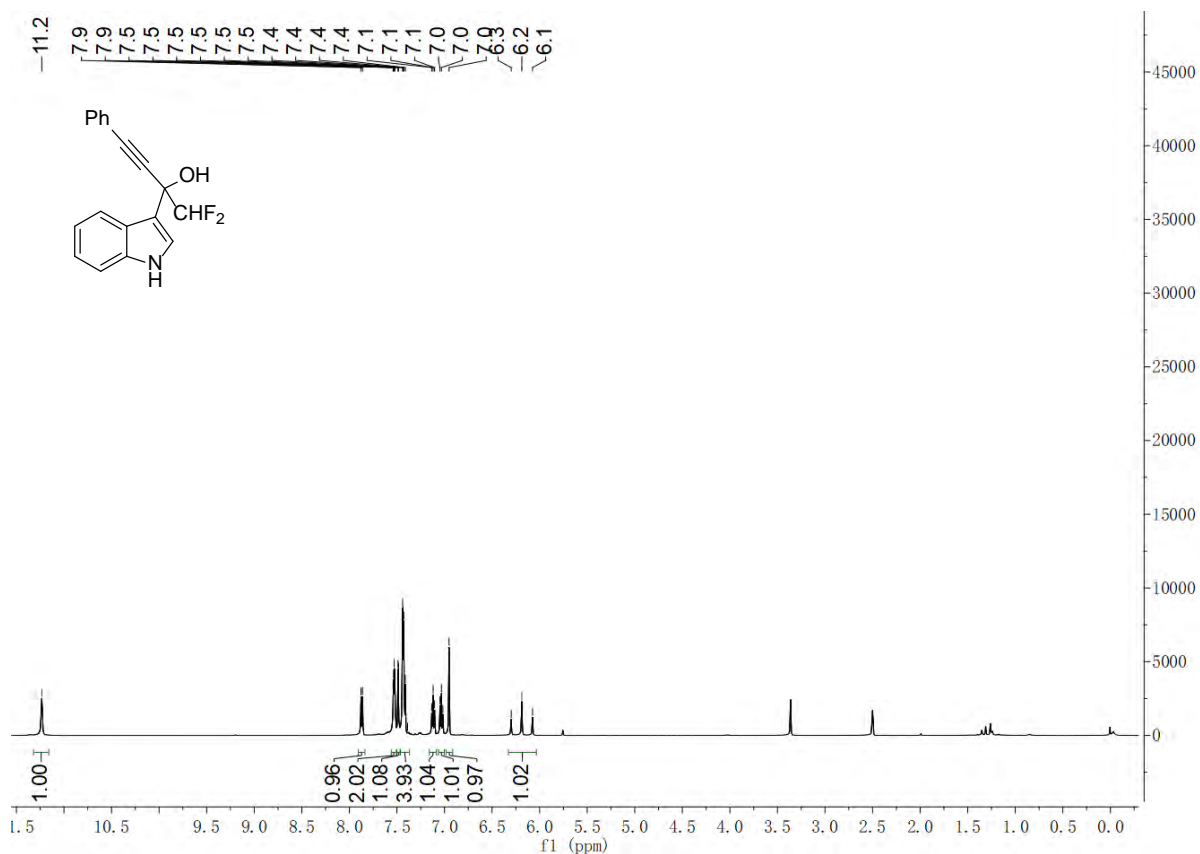

### <sup>13</sup>C NMR of compound 1ag (in DMSO-d<sub>6</sub>)

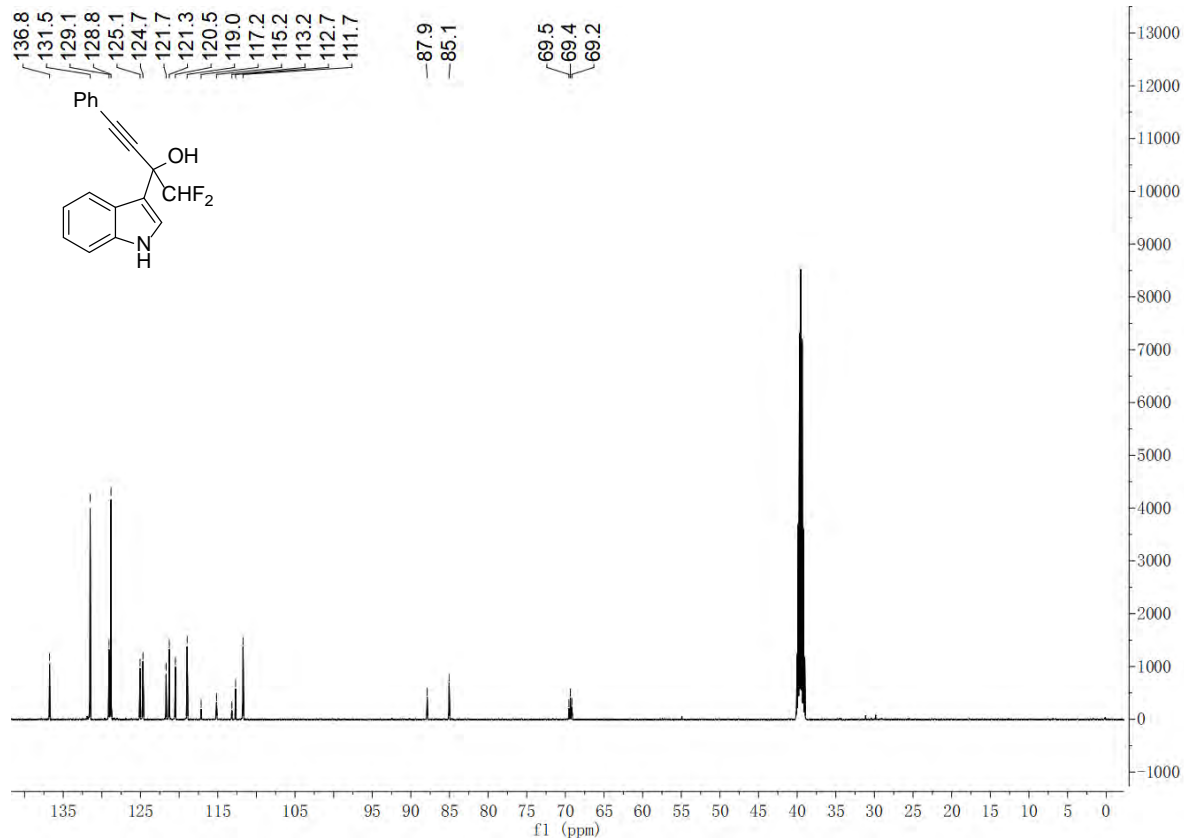

**<sup>19</sup>F NMR of compound 1ag (in DMSO-d<sub>6</sub>)**

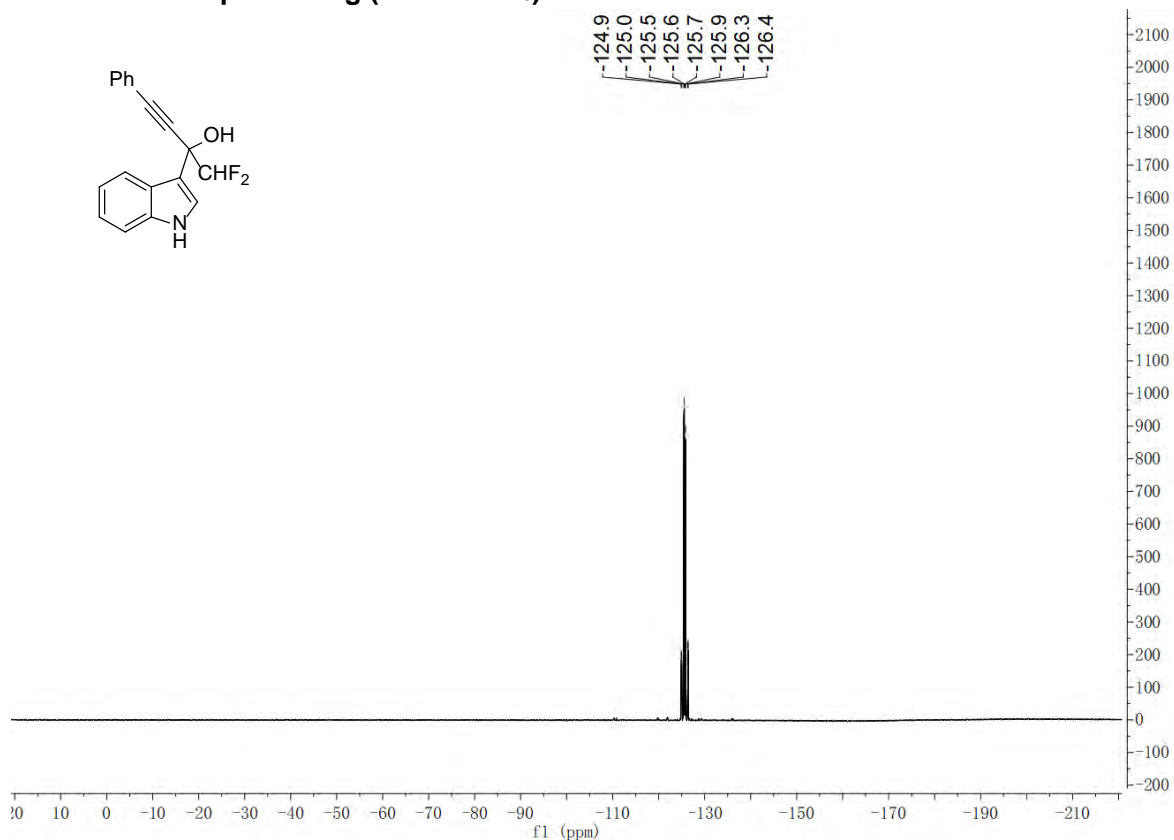

**<sup>1</sup>H NMR of compound 3a (in CDCl<sub>3</sub>)**

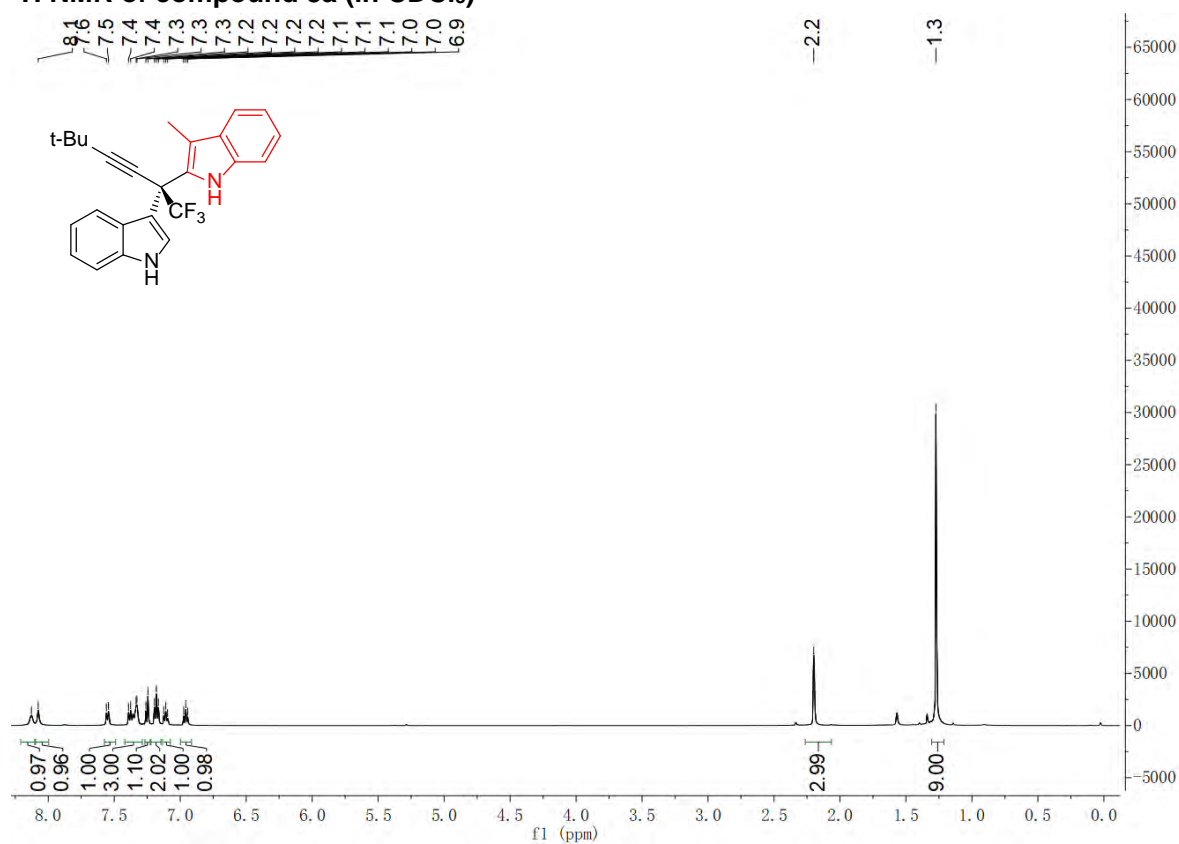

### <sup>13</sup>C NMR of compound 3a (in CDCl<sub>3</sub>)

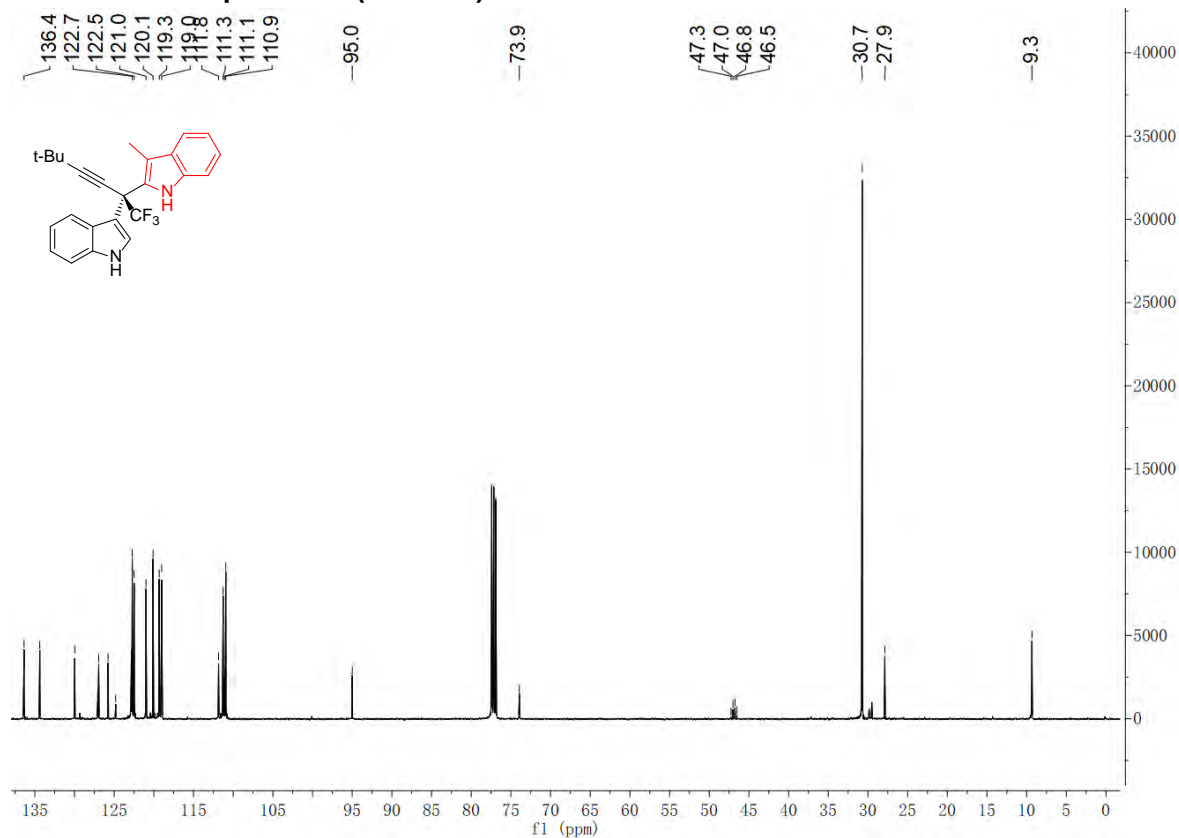

### <sup>19</sup>F NMR of compound 3a (in CDCl<sub>3</sub>)

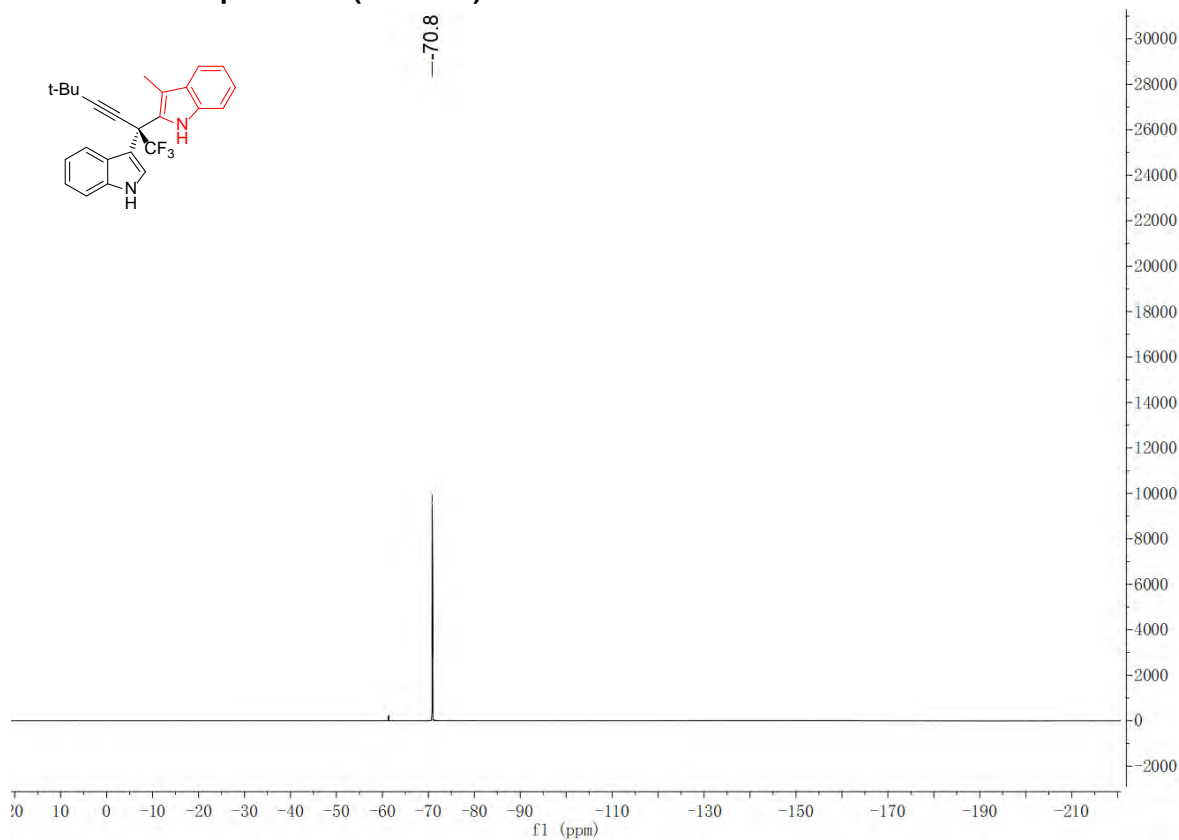

### <sup>1</sup>H NMR of compound 3b (in CDCl<sub>3</sub>)

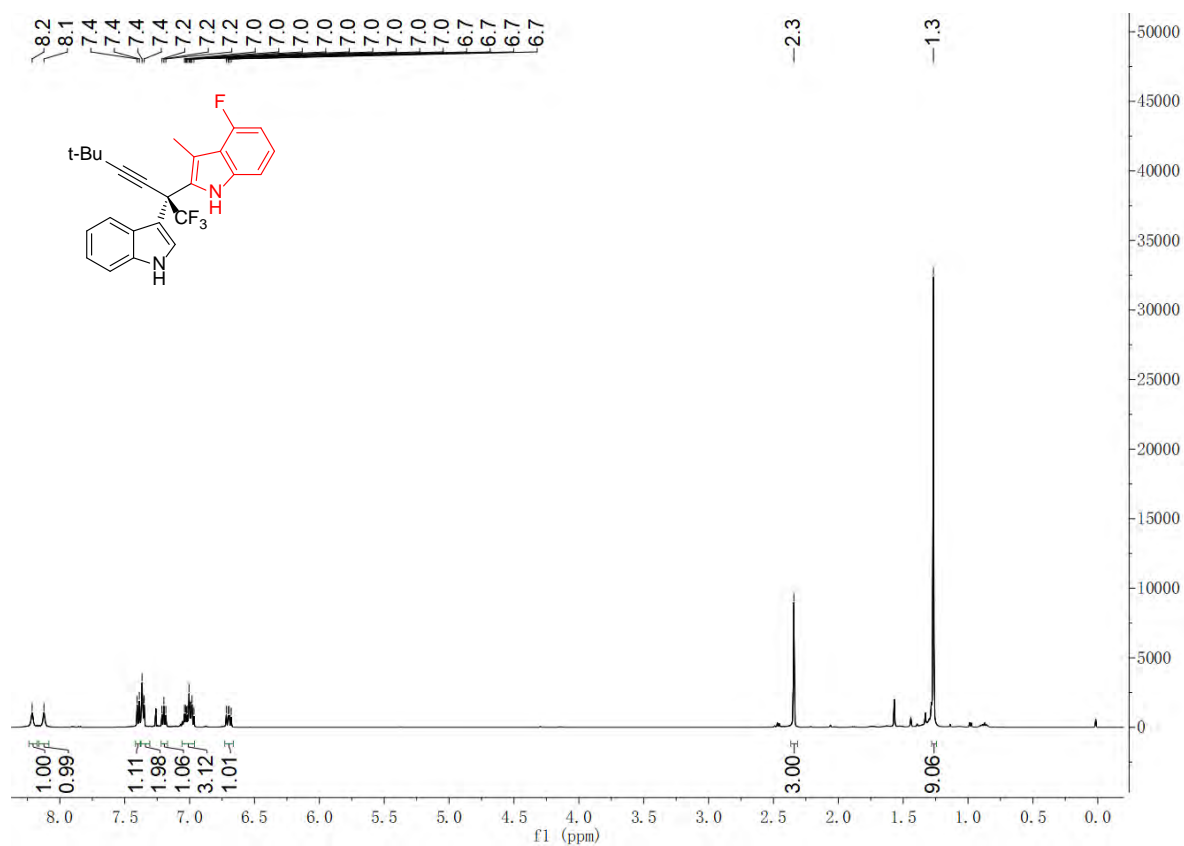

### <sup>13</sup>C NMR of compound 3b (in CDCl<sub>3</sub>)

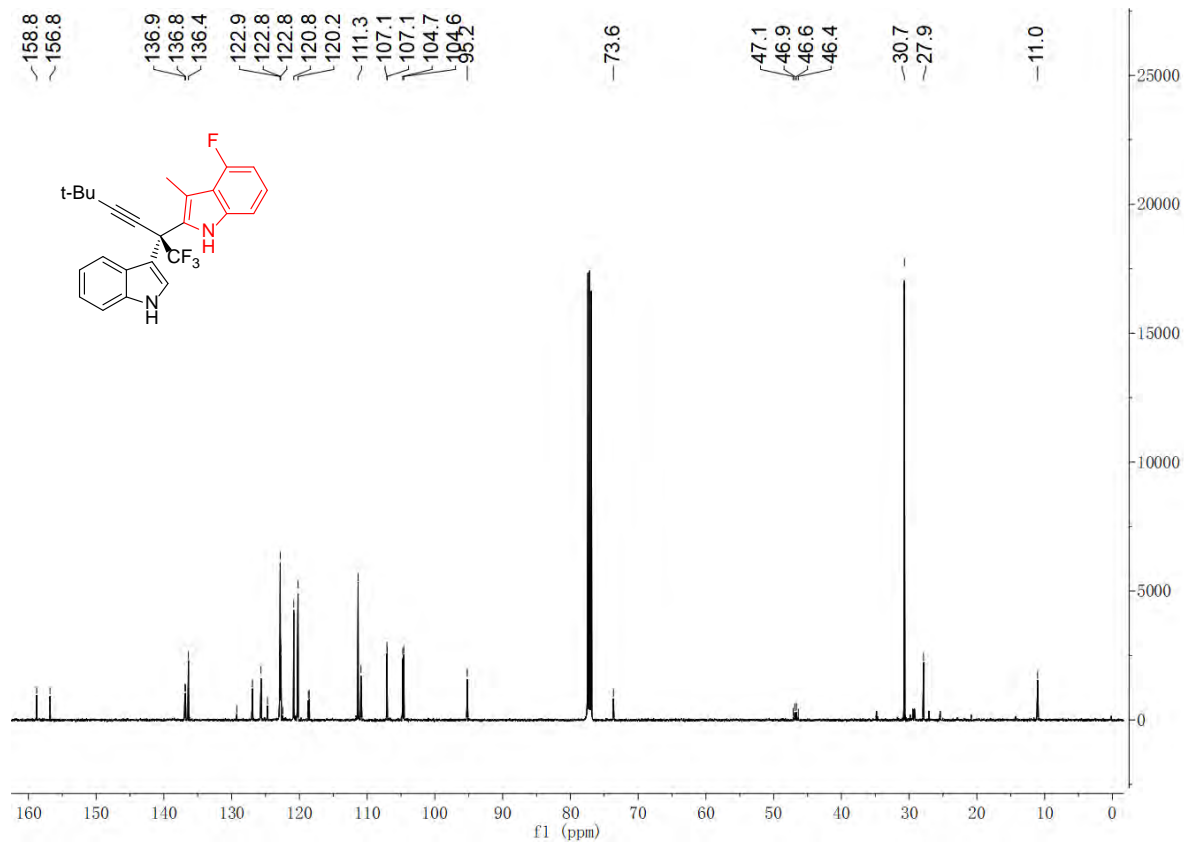

**<sup>19</sup>F NMR of compound 3b (in CDCl<sub>3</sub>)**

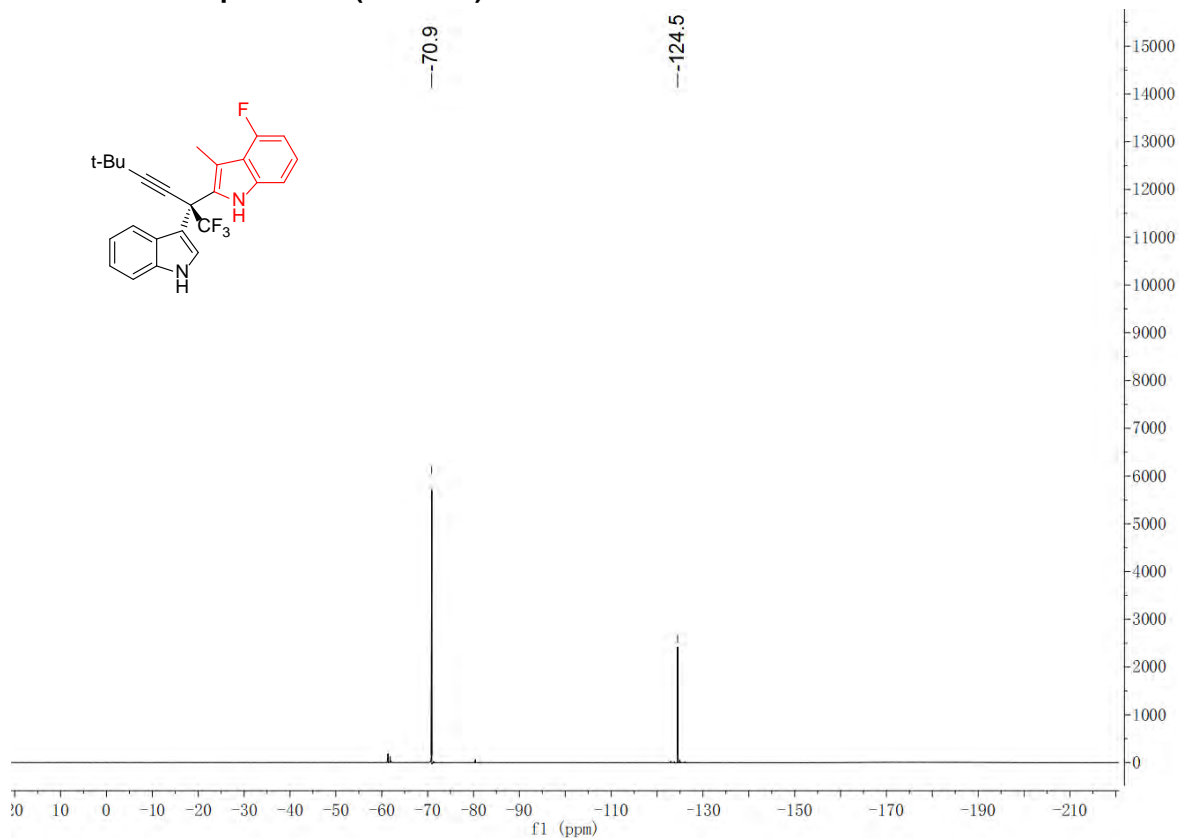

**<sup>1</sup>H NMR of compound 3c (in CDCl<sub>3</sub>)**

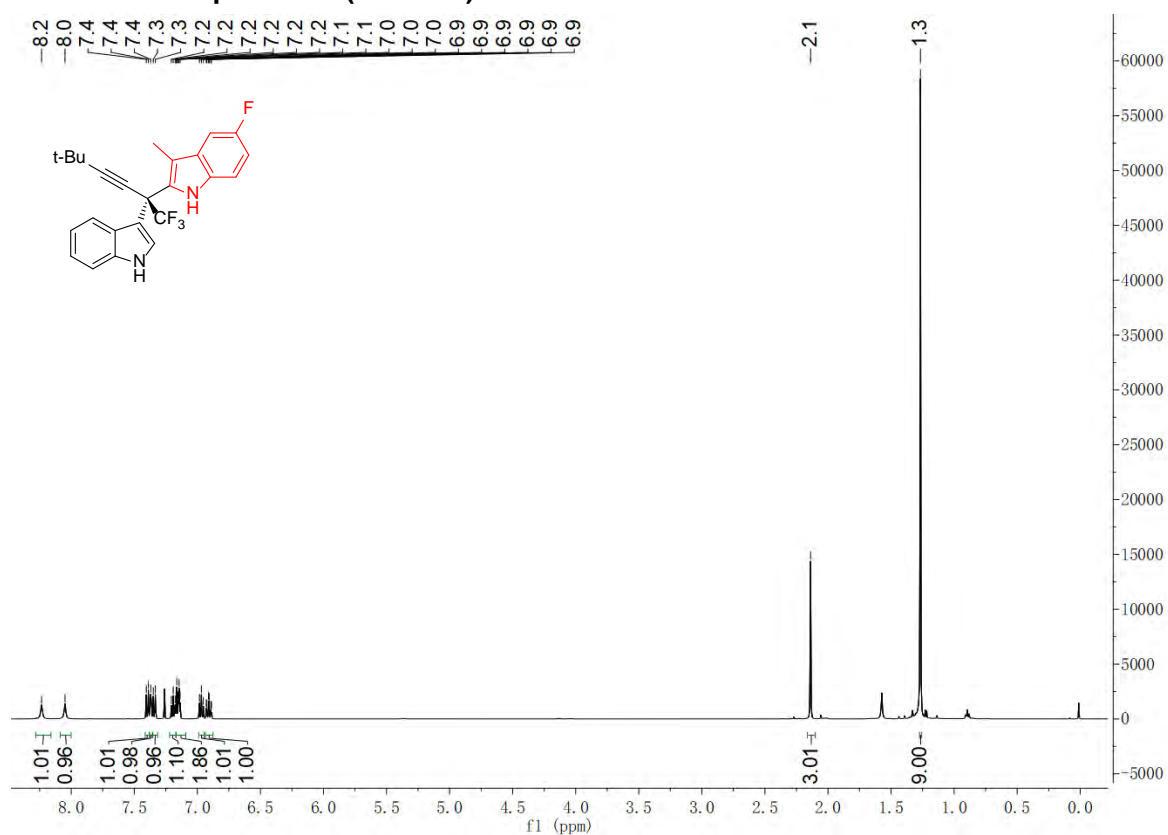

### <sup>13</sup>C NMR of compound 3c (in CDCl<sub>3</sub>)

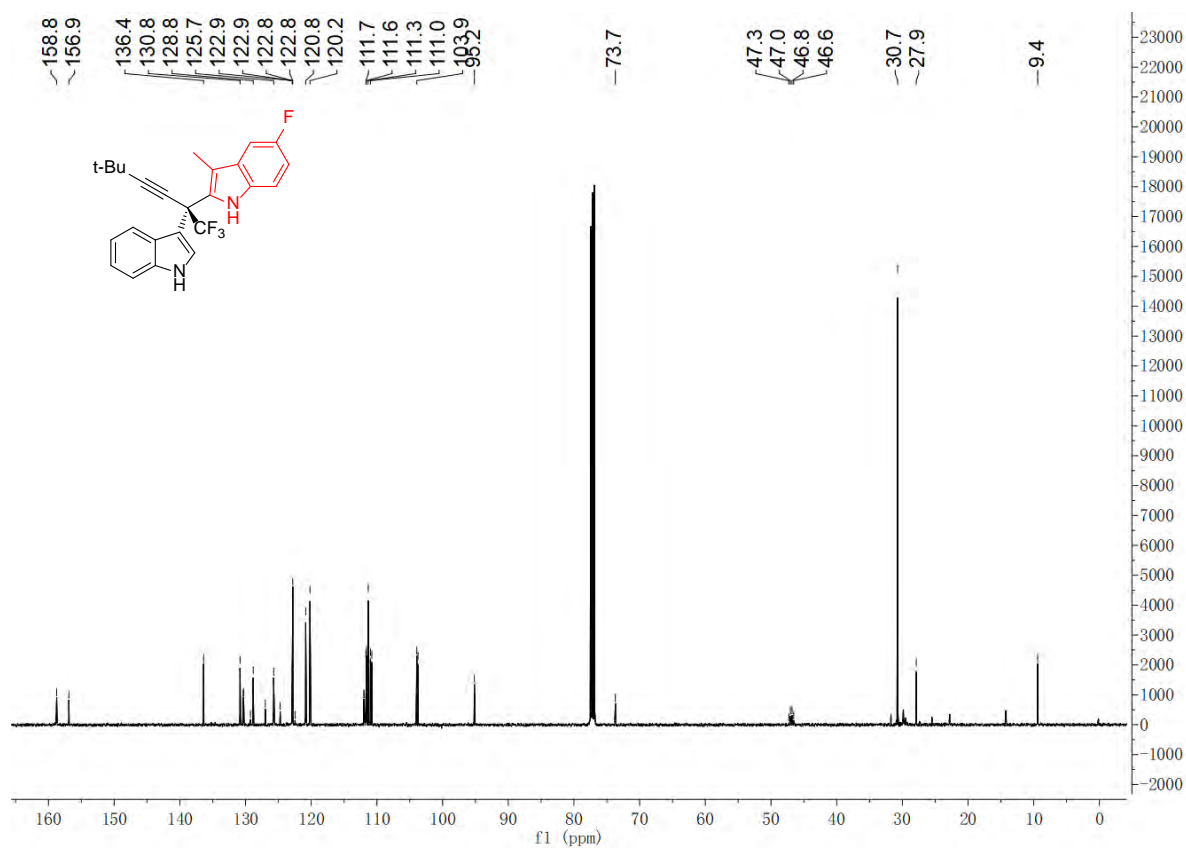

### <sup>19</sup>F NMR of compound 3c (in CDCl<sub>3</sub>)

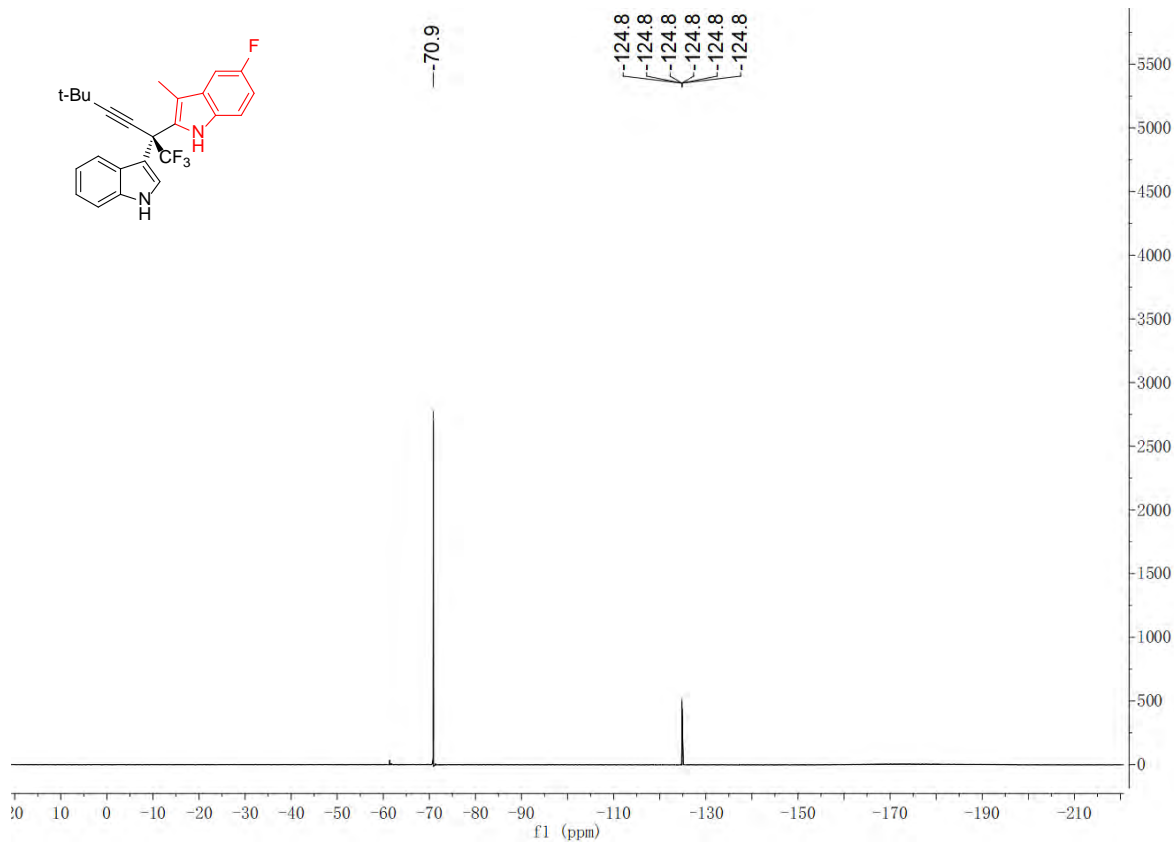

**<sup>1</sup>H NMR of compound 3d (in CDCl<sub>3</sub>)**

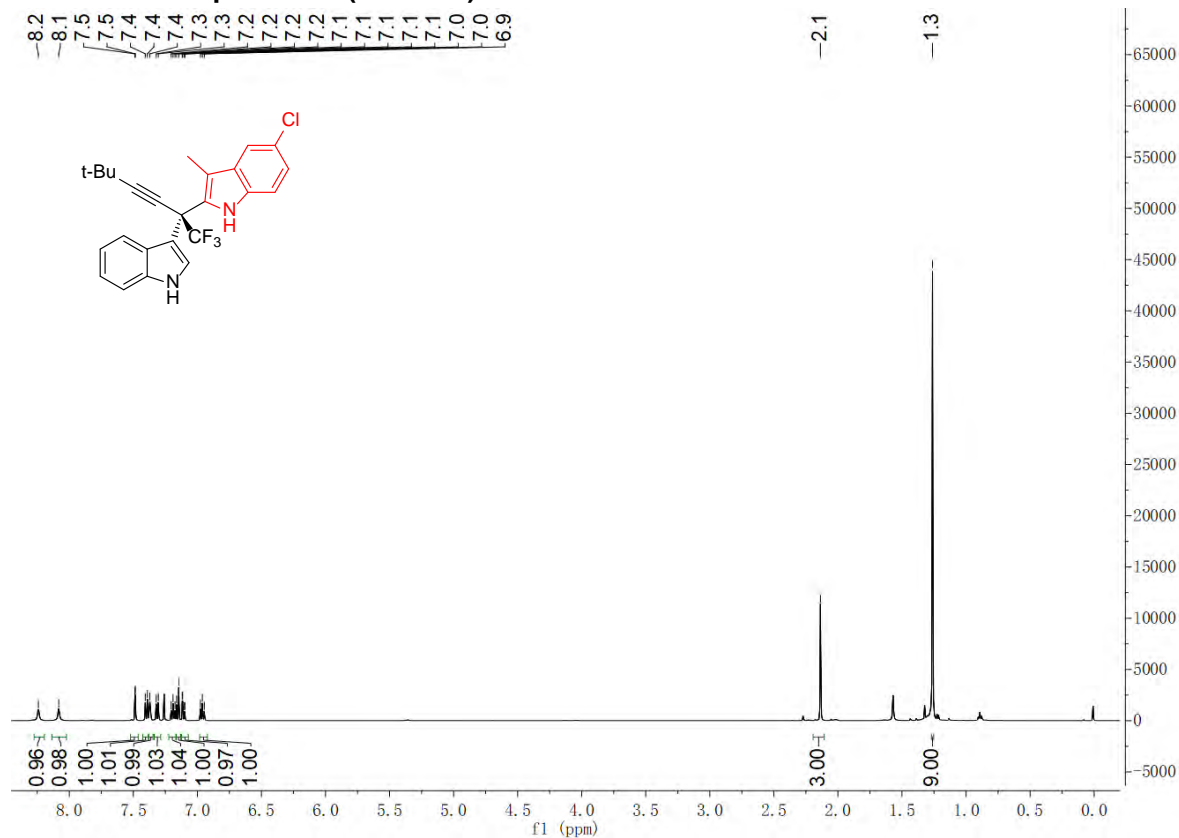

**<sup>13</sup>C NMR of compound 3d (in CDCl<sub>3</sub>)**

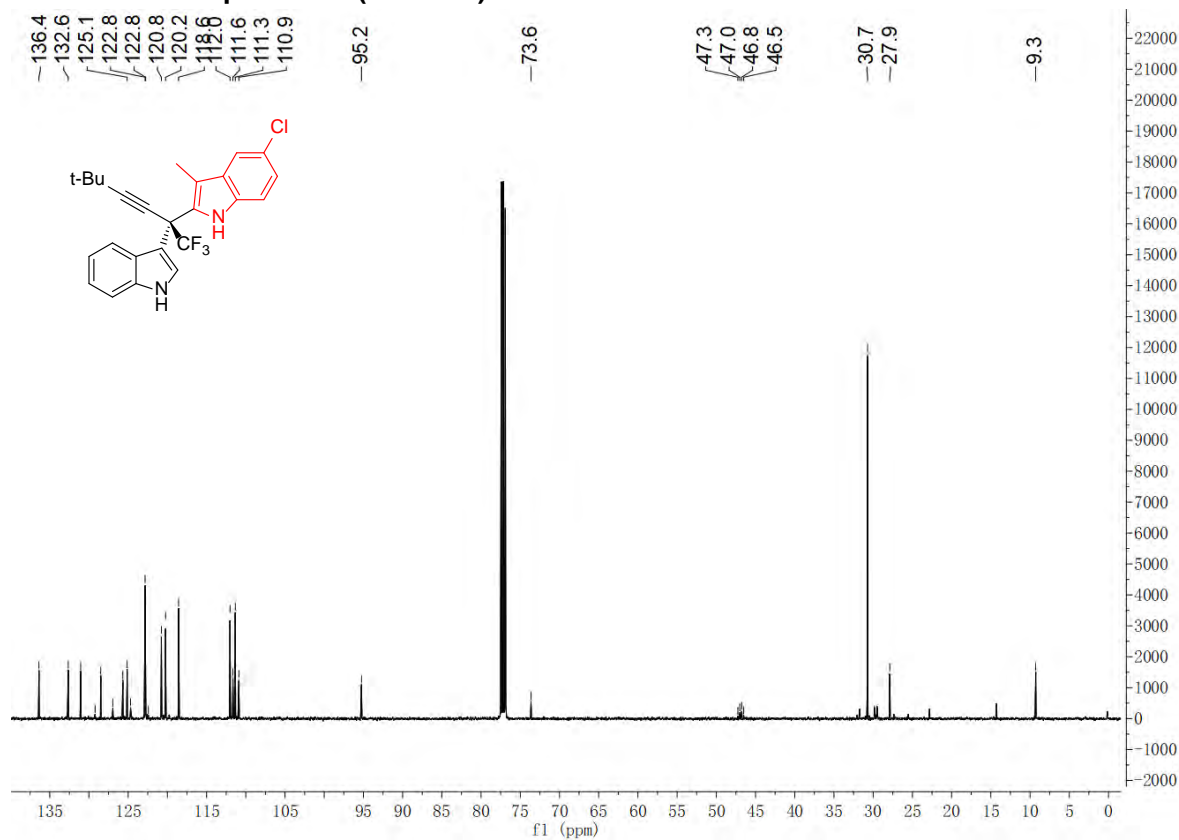

**<sup>19</sup>F NMR of compound 3d (in CDCl<sub>3</sub>)**

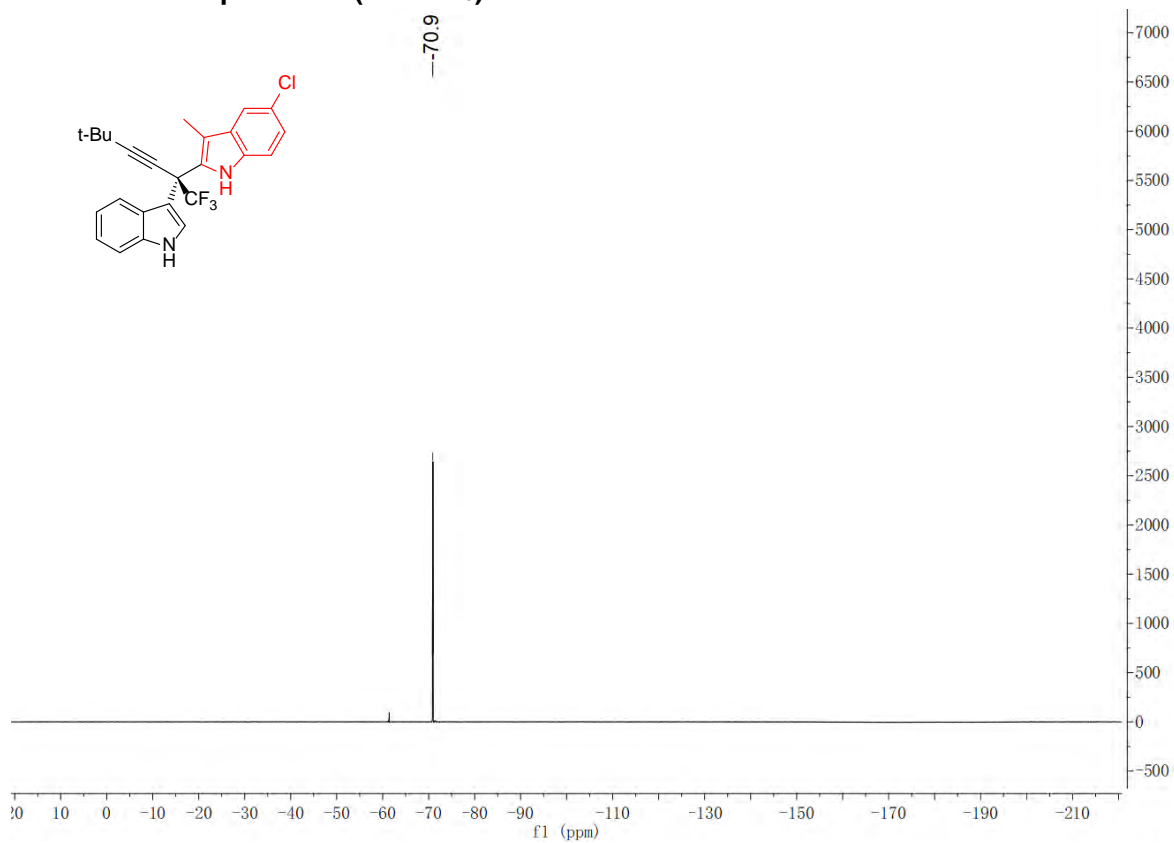

**<sup>1</sup>H NMR of compound 3e (in CDCl<sub>3</sub>)**

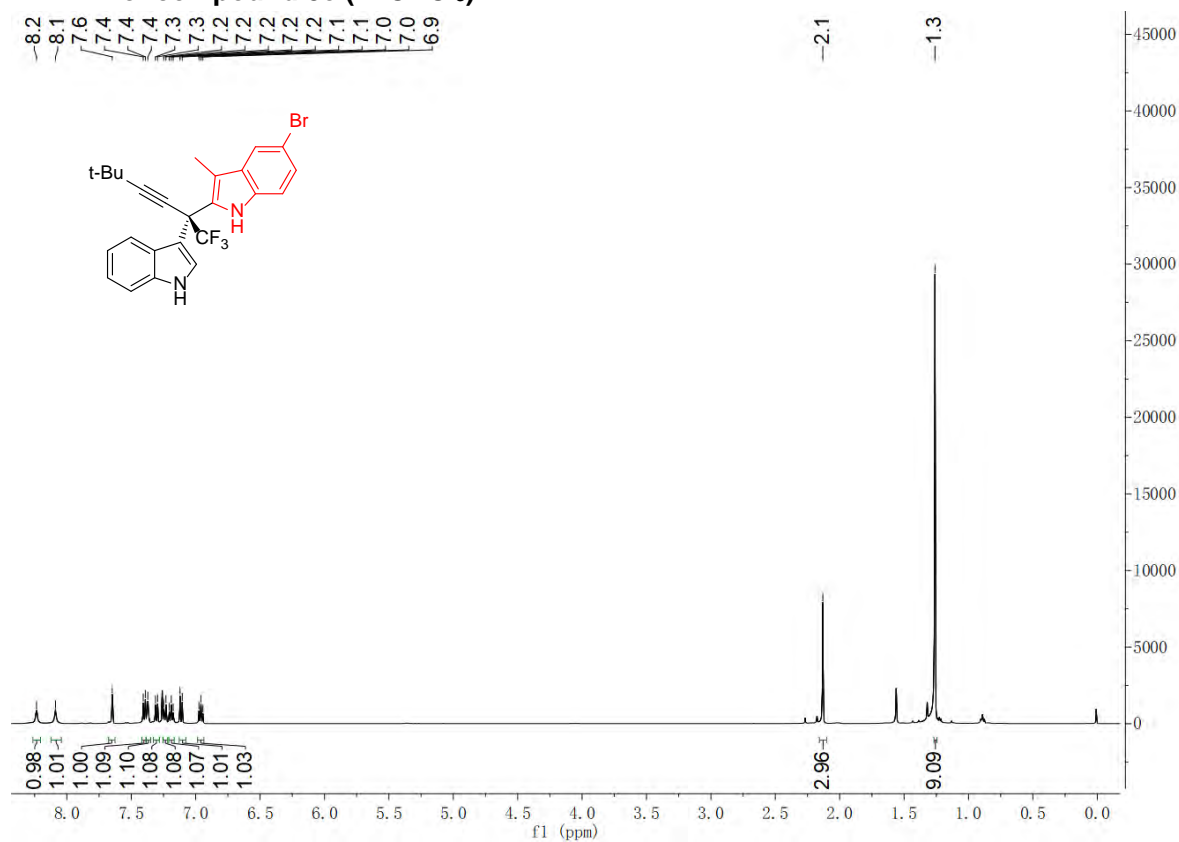



**<sup>13</sup>C NMR of compound 3e (in CDCl<sub>3</sub>)**

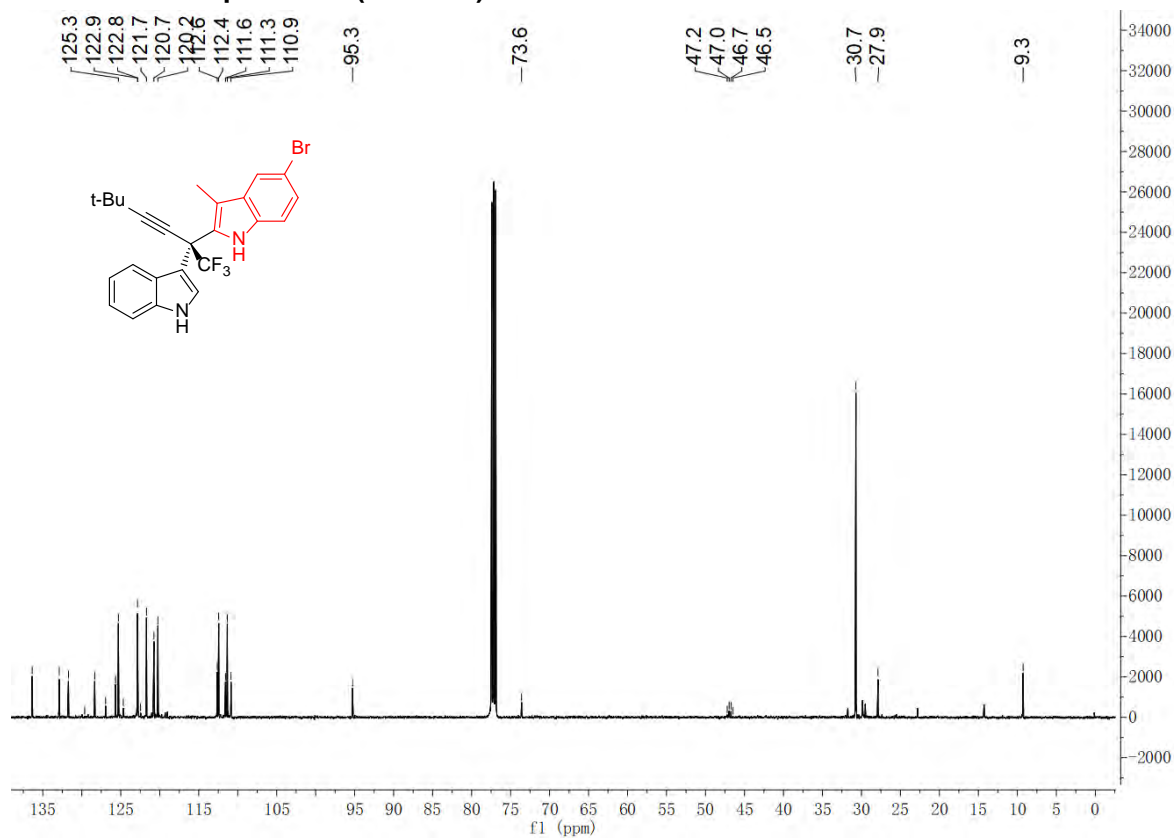

**<sup>19</sup>F NMR of compound 3e (in CDCl<sub>3</sub>)**

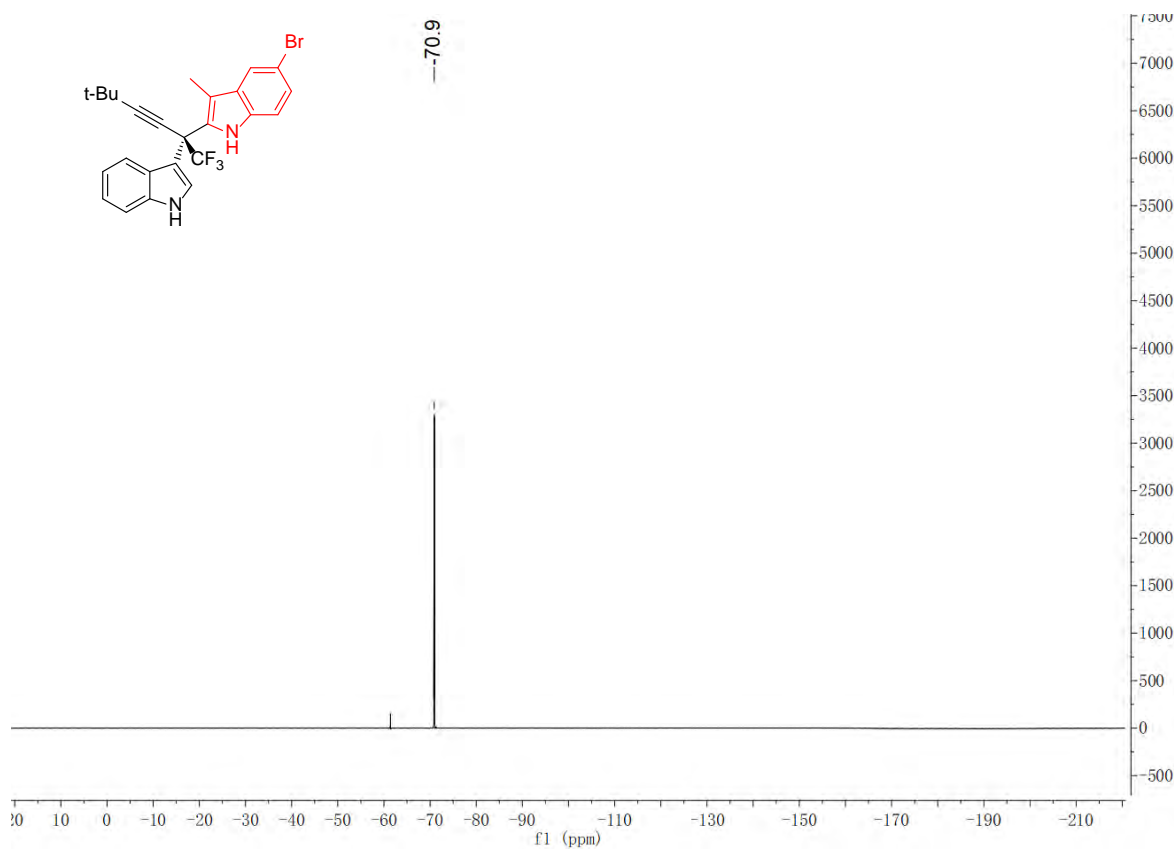

### <sup>1</sup>H NMR of compound 3f (in CDCl<sub>3</sub>)

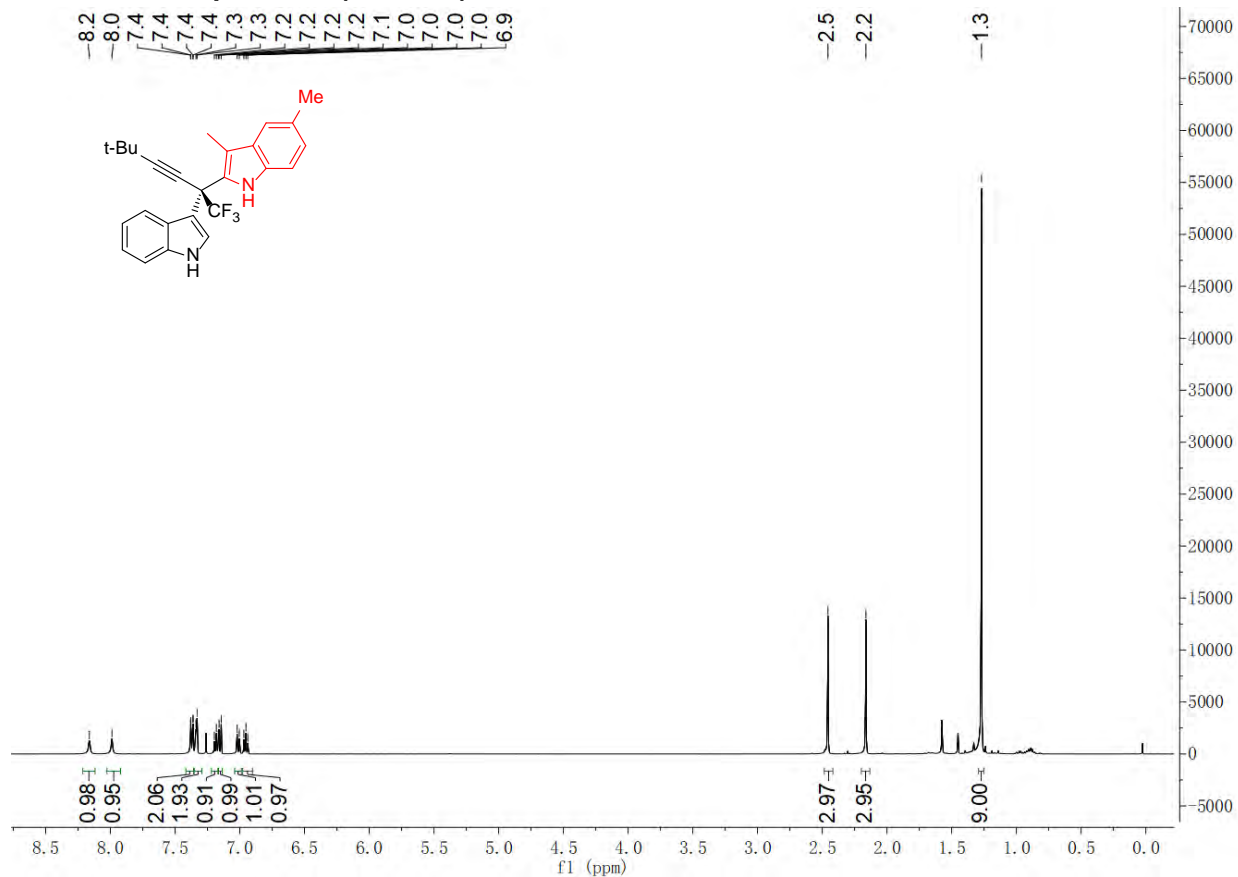

### <sup>13</sup>C NMR of compound 3f (in CDCl<sub>3</sub>)

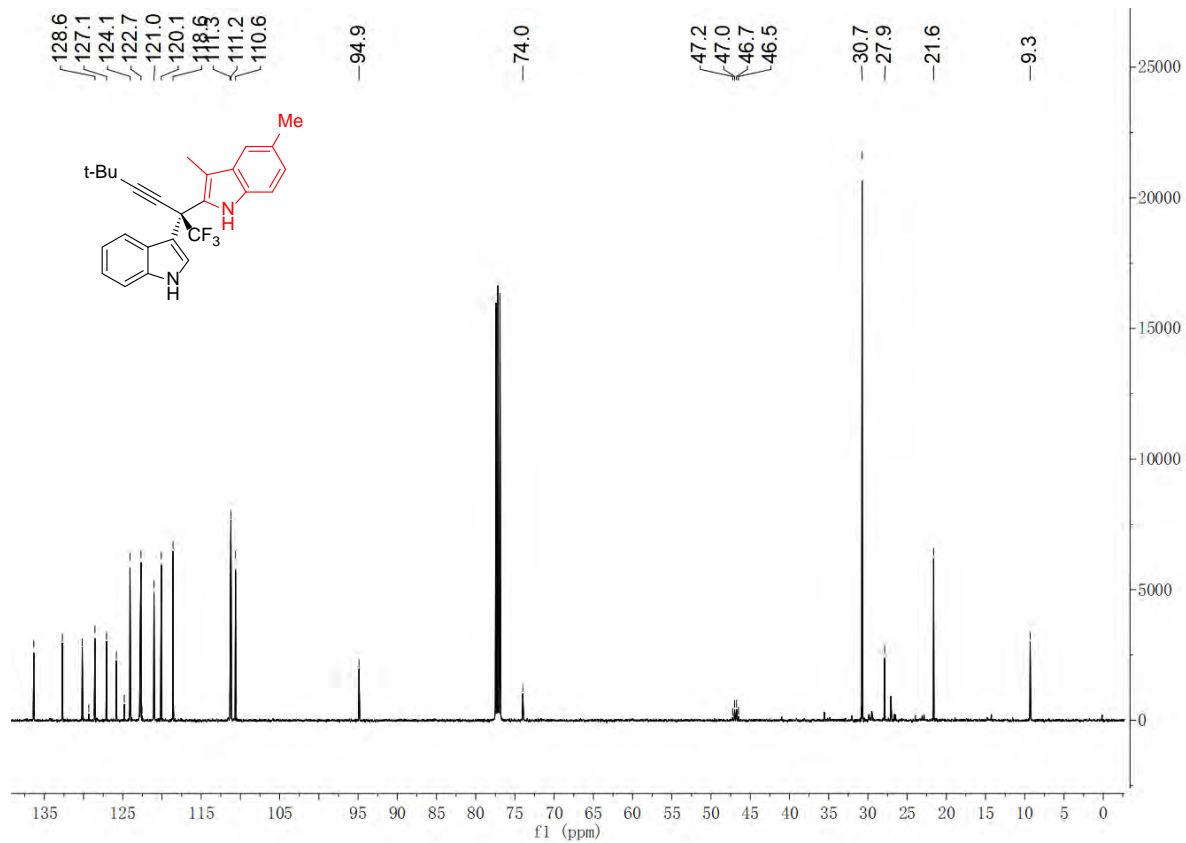

### <sup>19</sup>F NMR of compound 3f (in CDCl<sub>3</sub>)

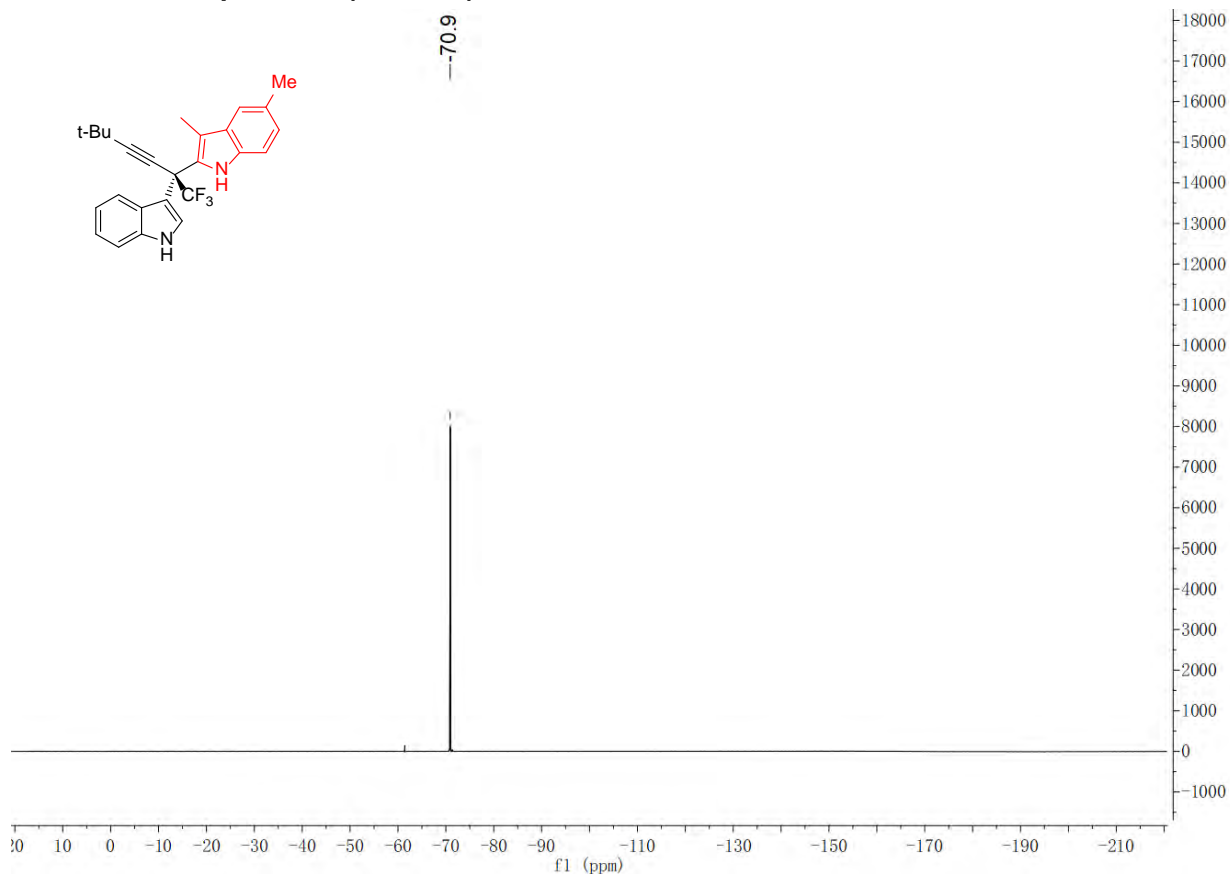

### <sup>1</sup>H NMR of compound 3g (in CDCl<sub>3</sub>)

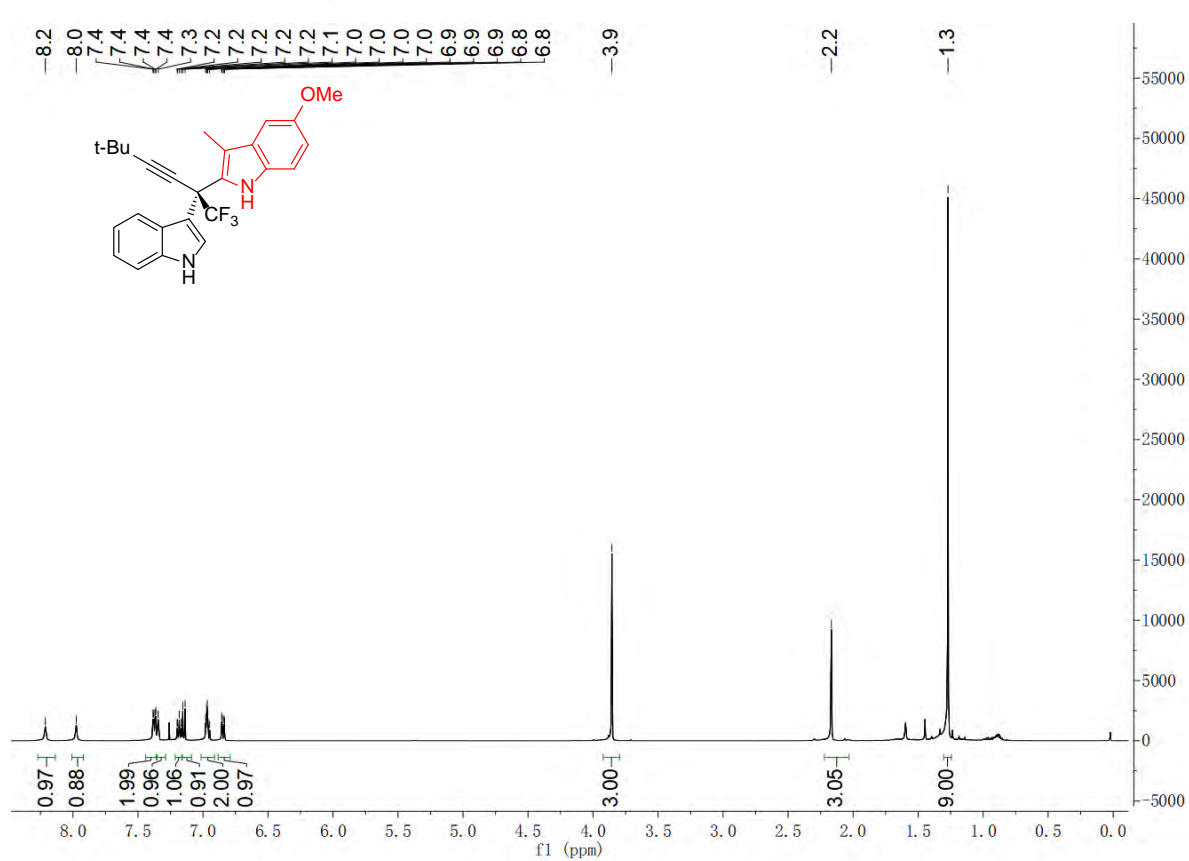

### <sup>13</sup>C NMR of compound 3g (in CDCl<sub>3</sub>)

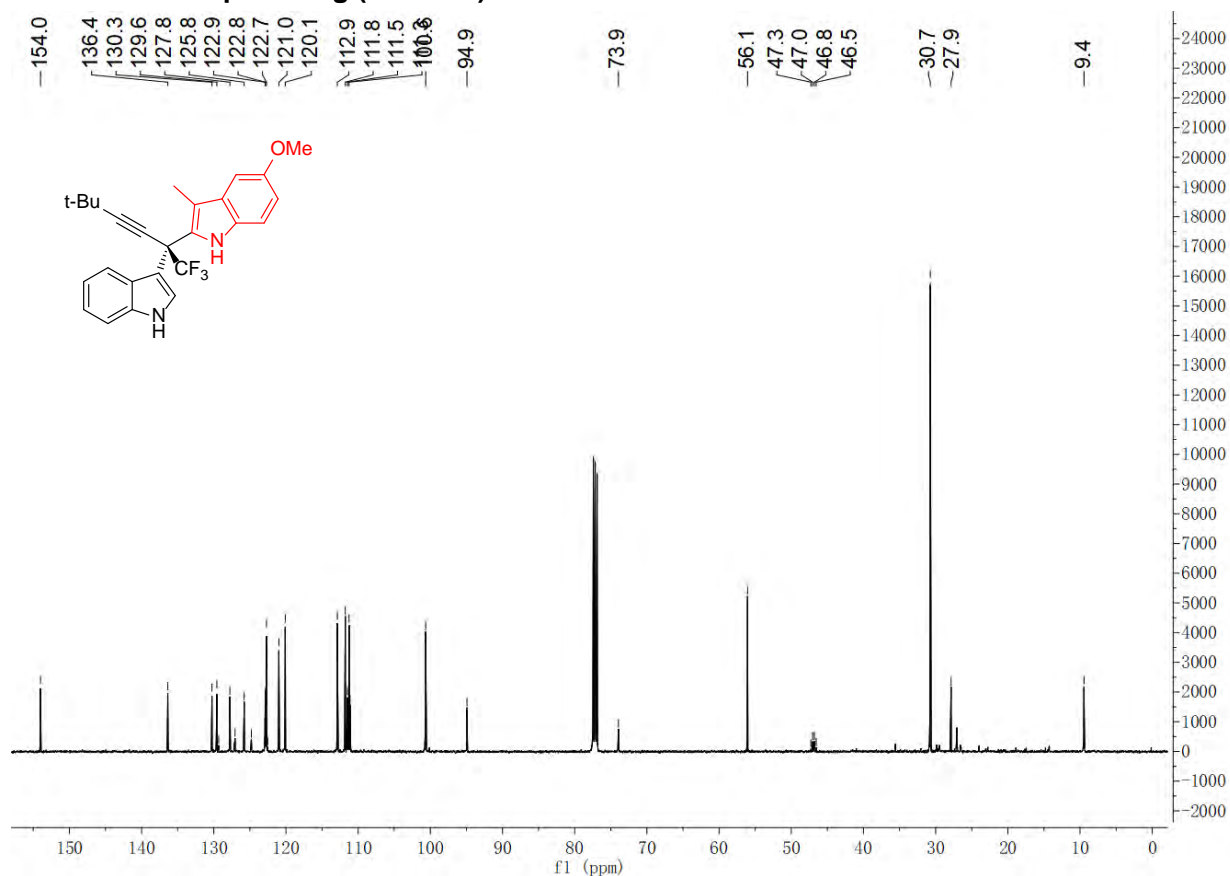

### <sup>19</sup>F NMR of compound 3g (in CDCl<sub>3</sub>)

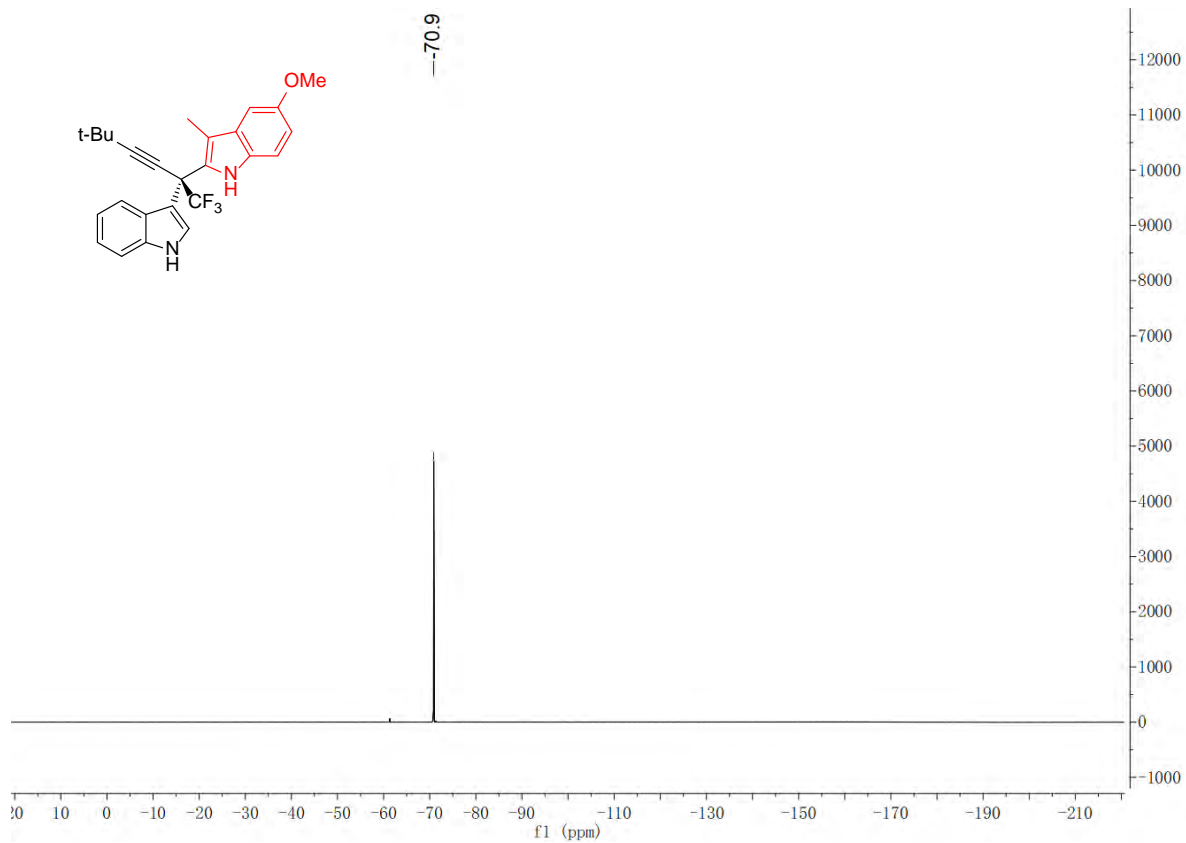

### <sup>1</sup>H NMR of compound 3h (in CDCl<sub>3</sub>)

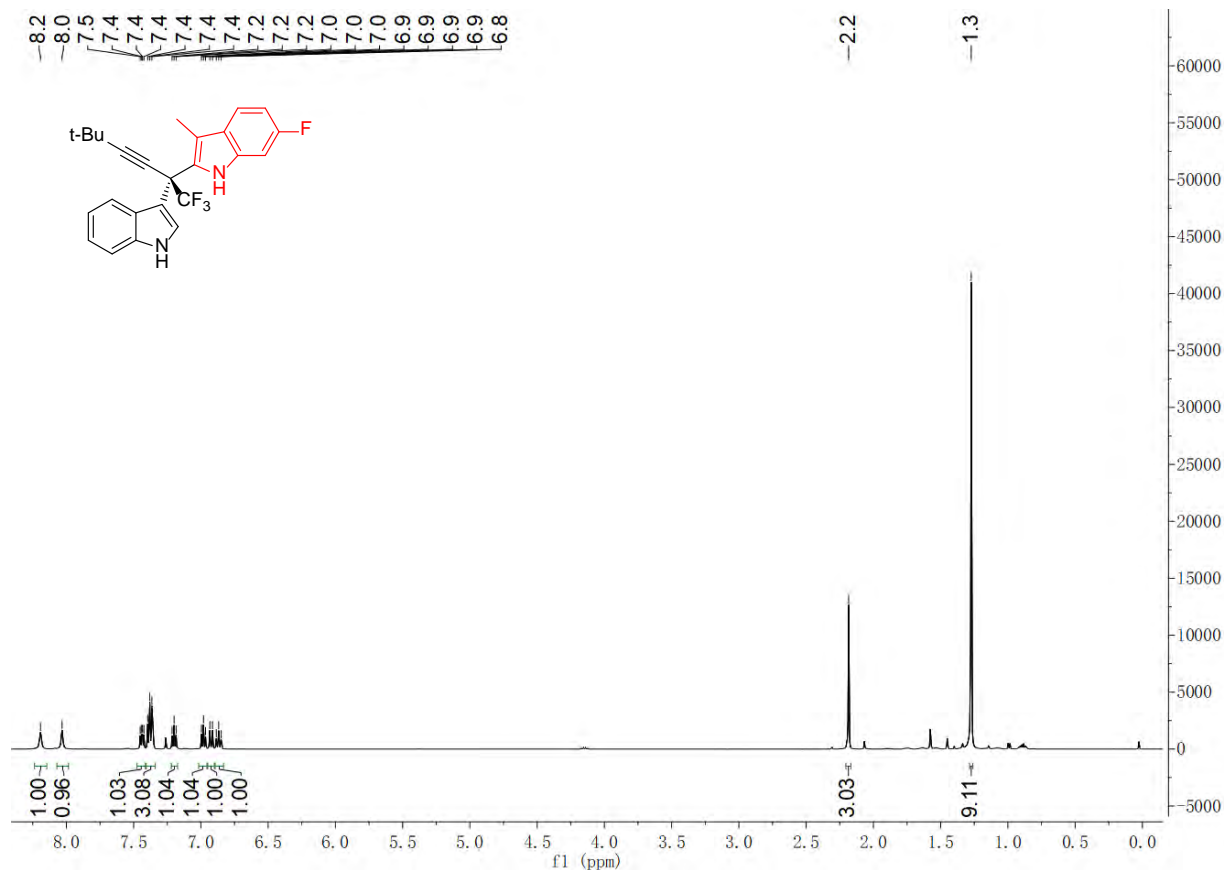

### <sup>13</sup>C NMR of compound 3h (in CDCl<sub>3</sub>)

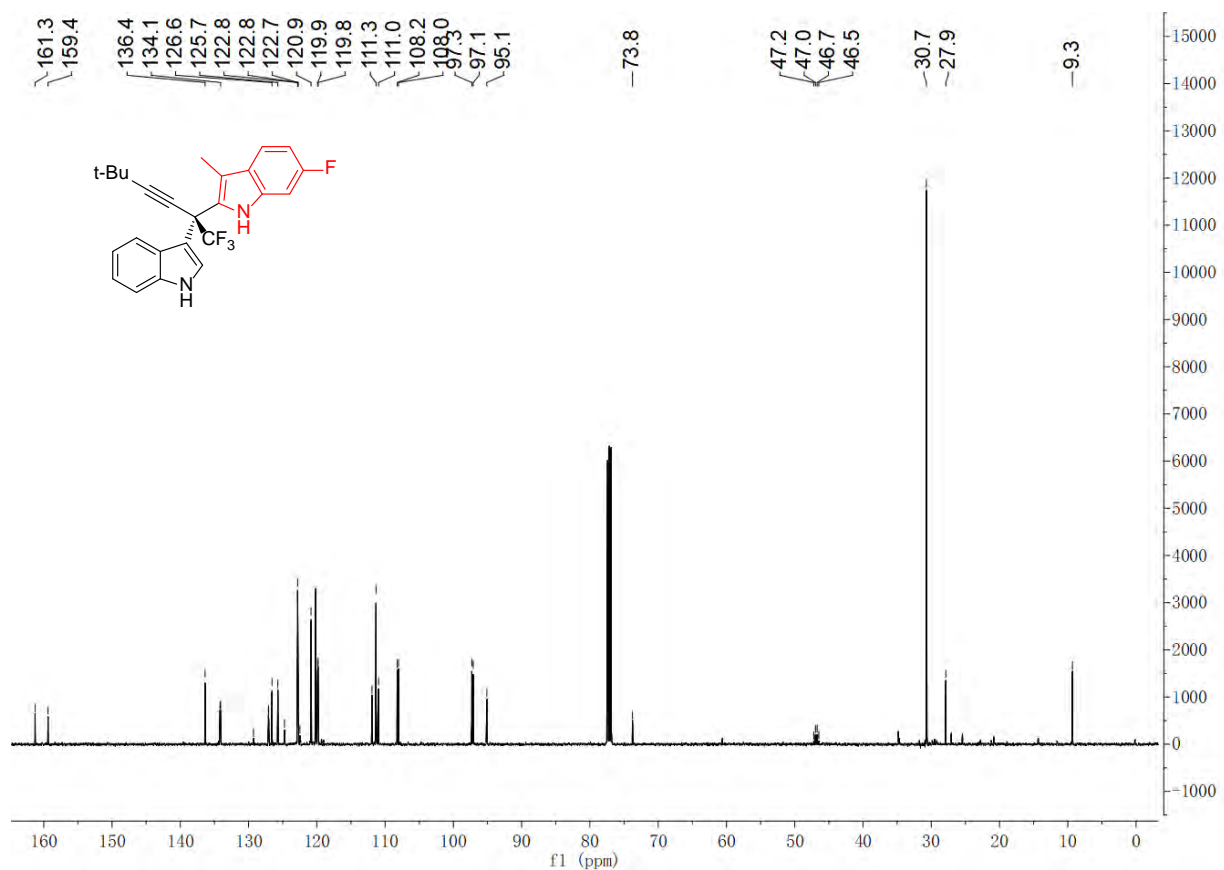

**<sup>19</sup>F NMR of compound 3h (in CDCl<sub>3</sub>)**

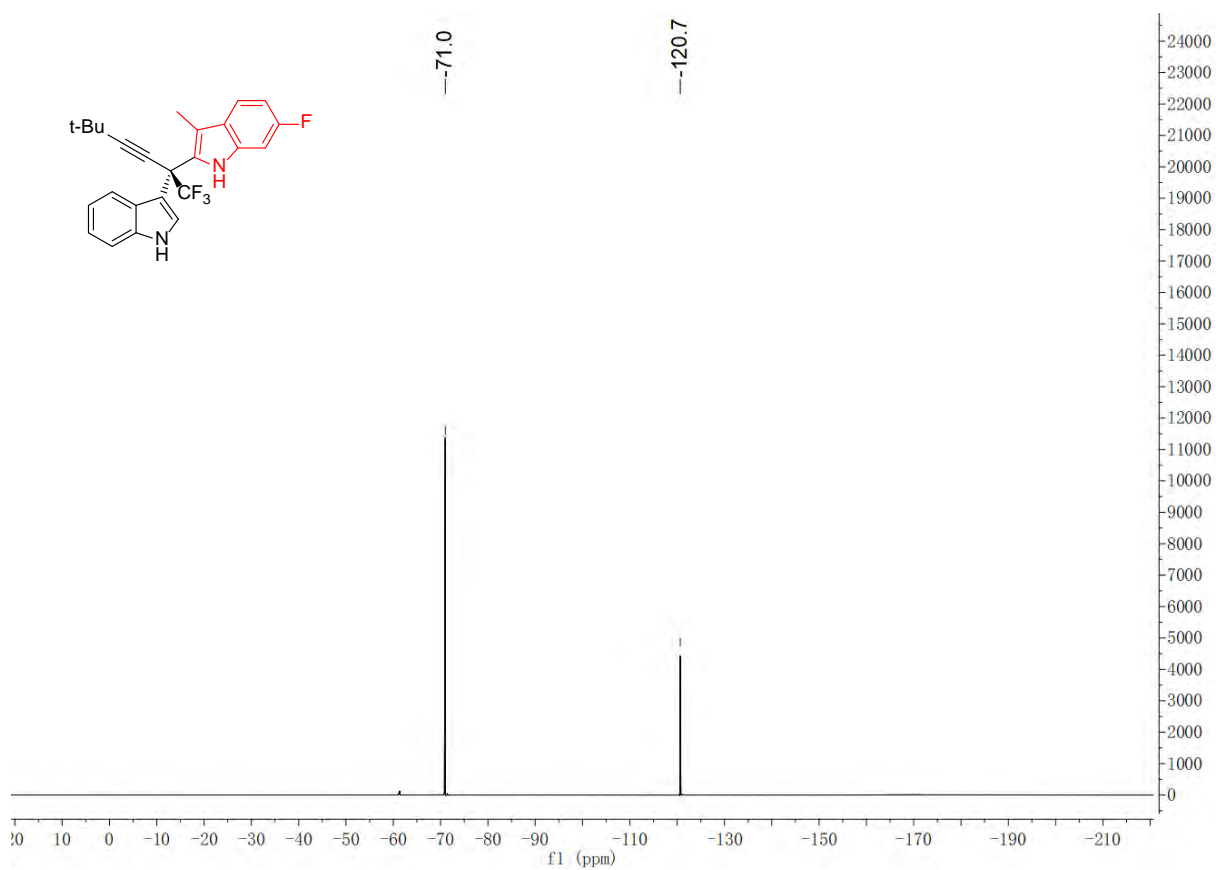

**<sup>1</sup>H NMR of compound 3i (in CDCl<sub>3</sub>)**

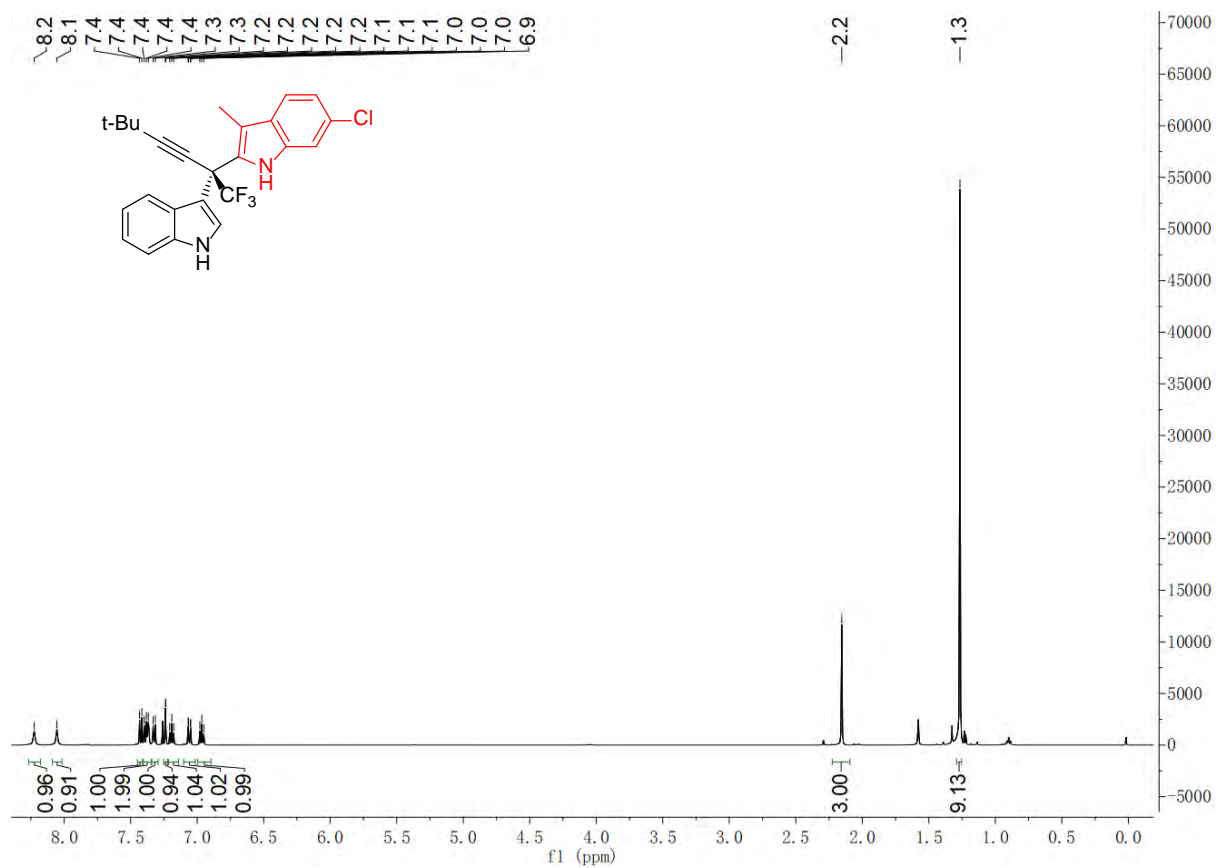

### <sup>13</sup>C NMR of compound 3i (in CDCl<sub>3</sub>)

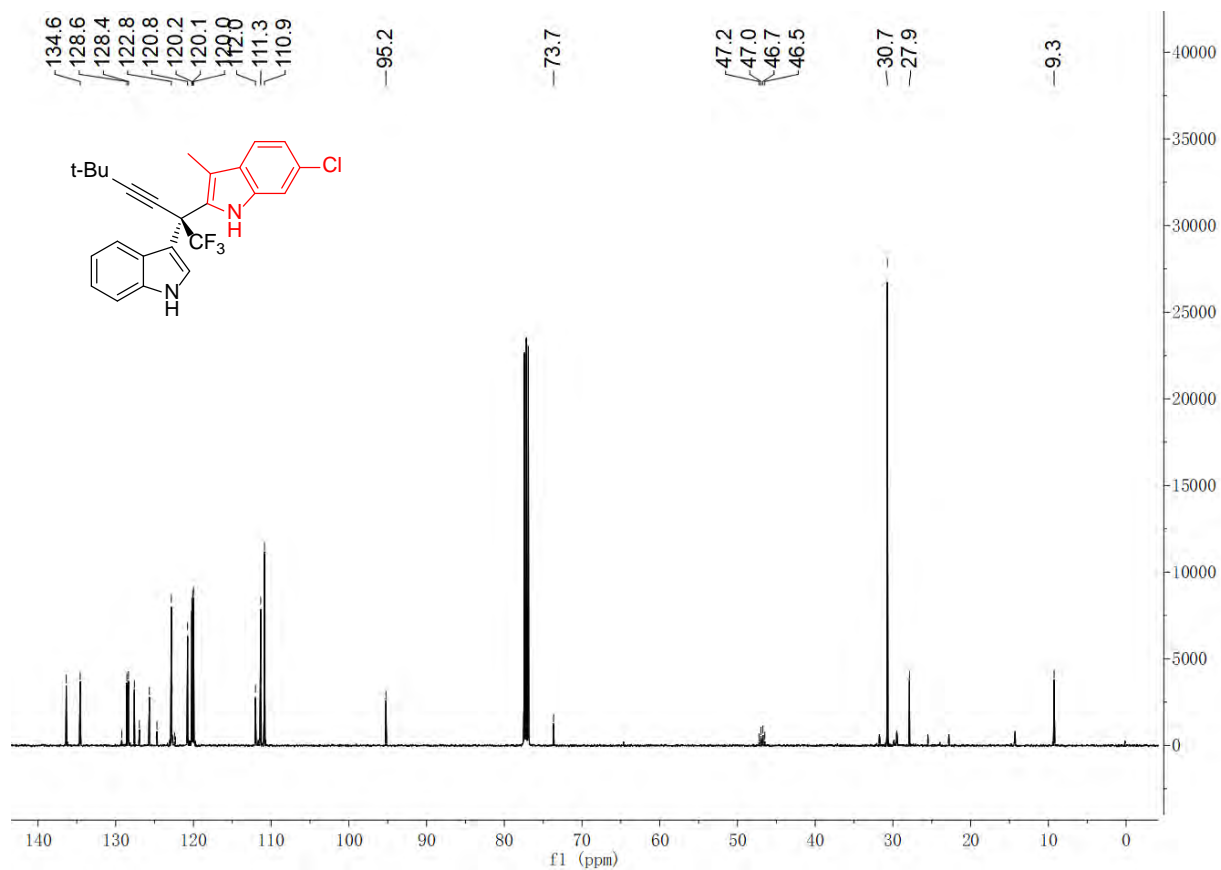

### <sup>19</sup>F NMR of compound 3i (in CDCl<sub>3</sub>)

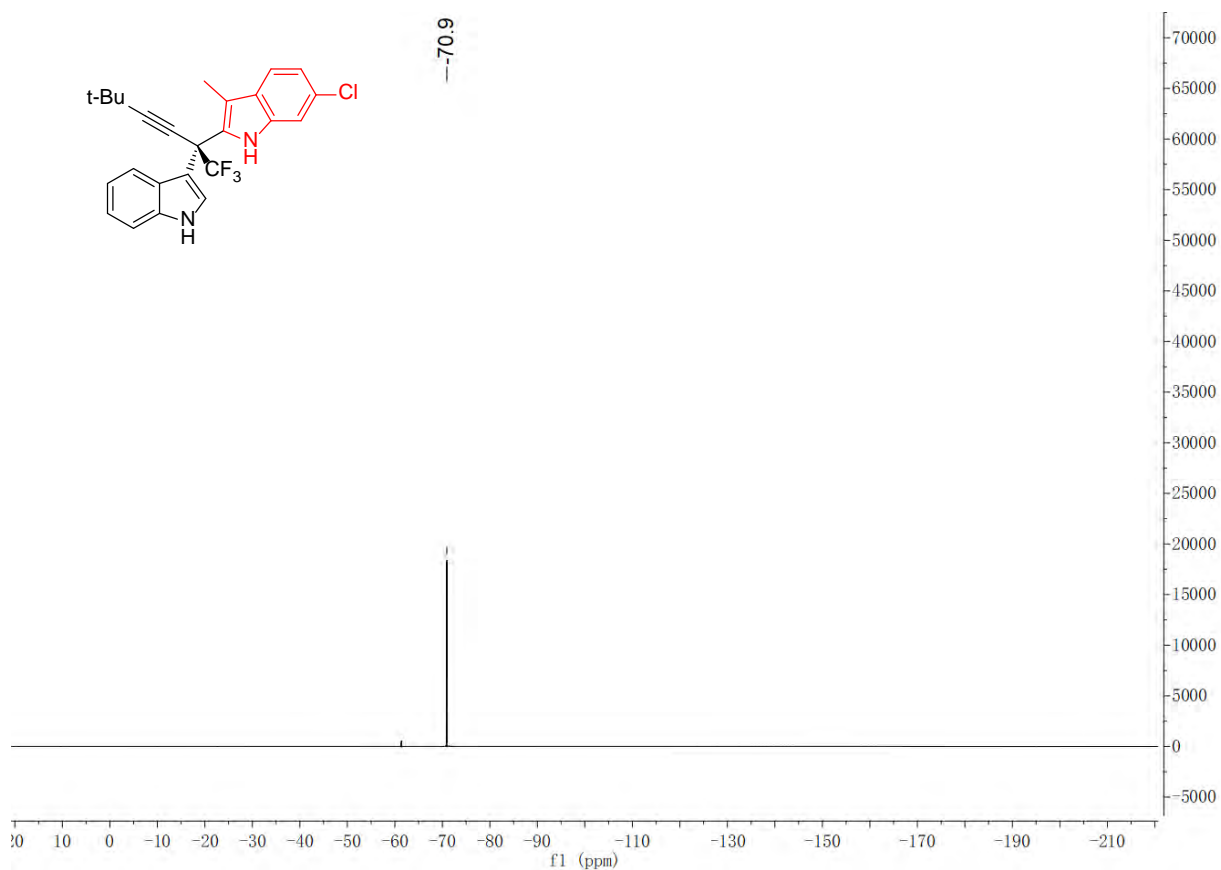

### <sup>1</sup>H NMR of compound 3j (in CDCl<sub>3</sub>)

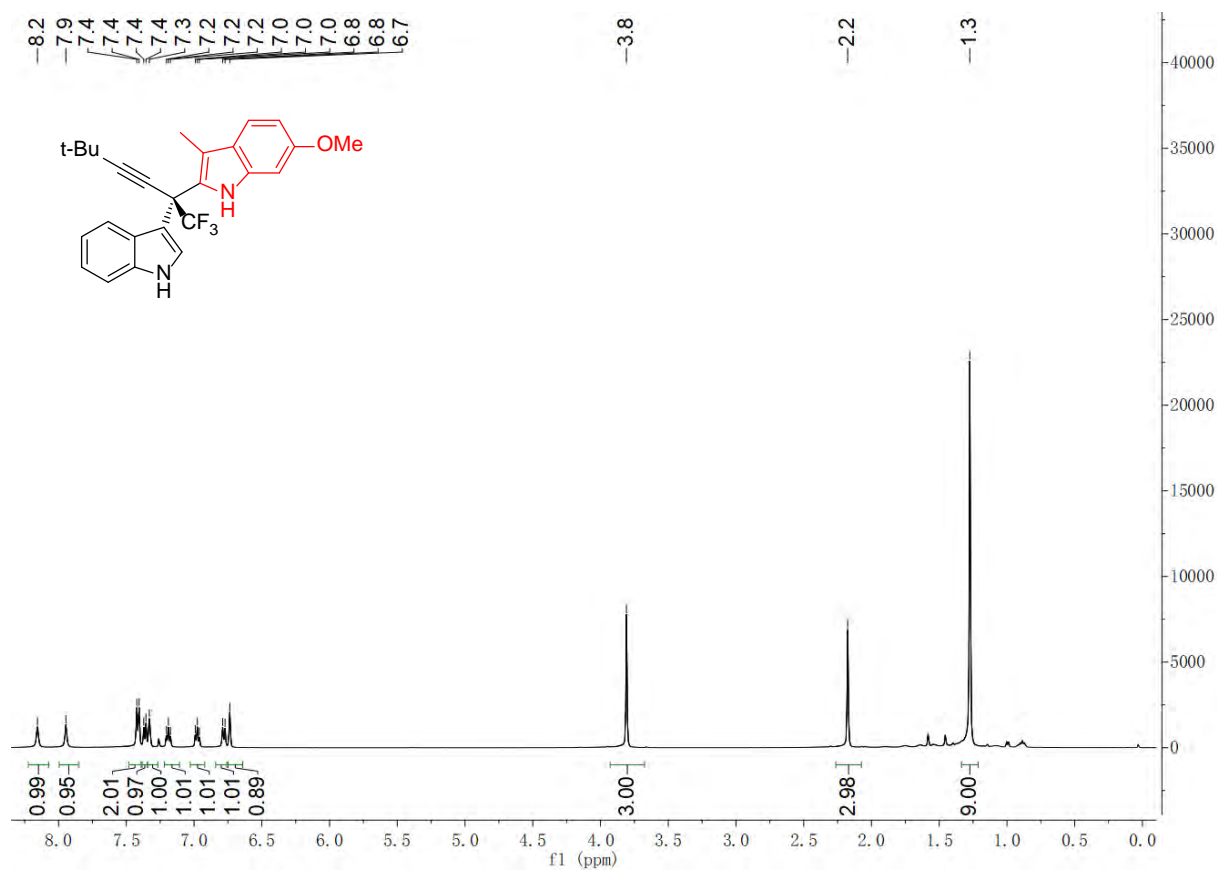

### <sup>13</sup>C NMR of compound 3j (in CDCl<sub>3</sub>)

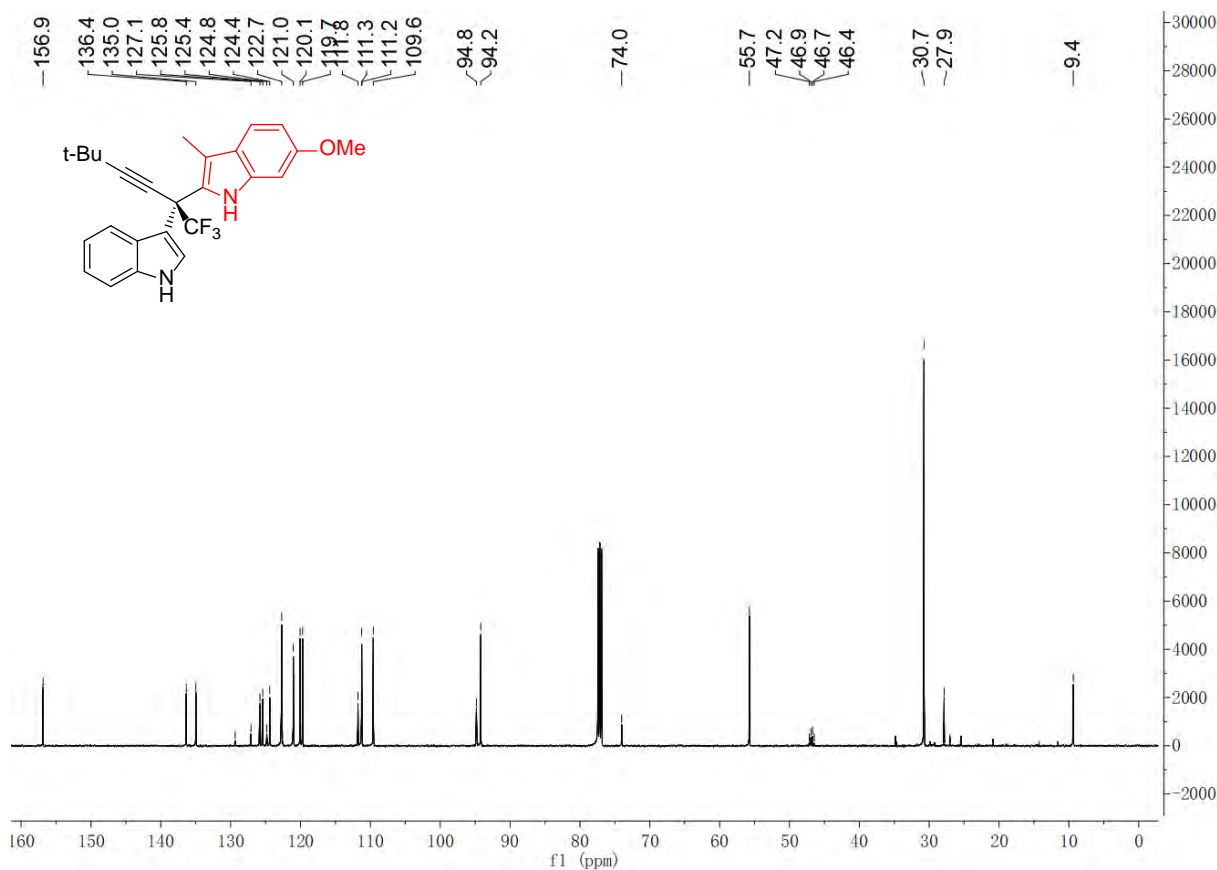



**<sup>19</sup>F NMR of compound 3j (in CDCl<sub>3</sub>)**

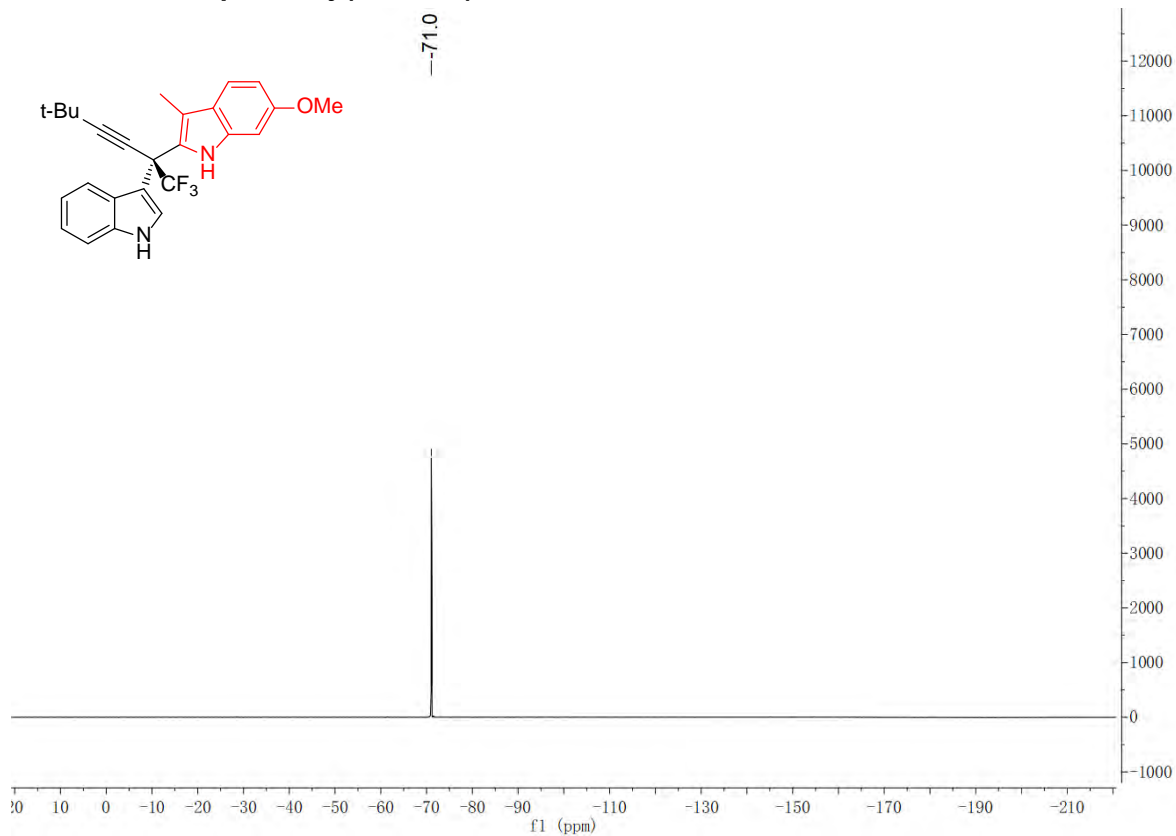

**<sup>1</sup>H NMR of compound 3k (in CDCl<sub>3</sub>)**

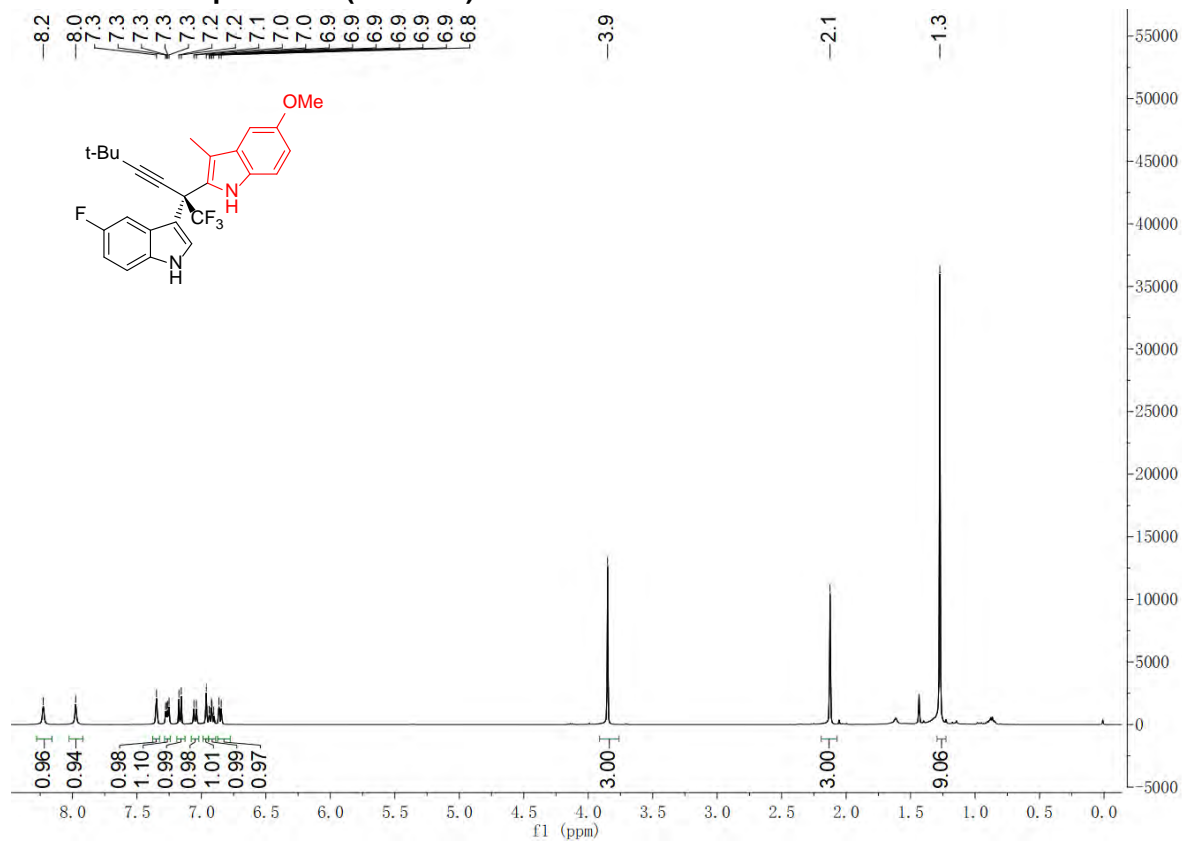

### <sup>13</sup>C NMR of compound 3k (in CDCl<sub>3</sub>)

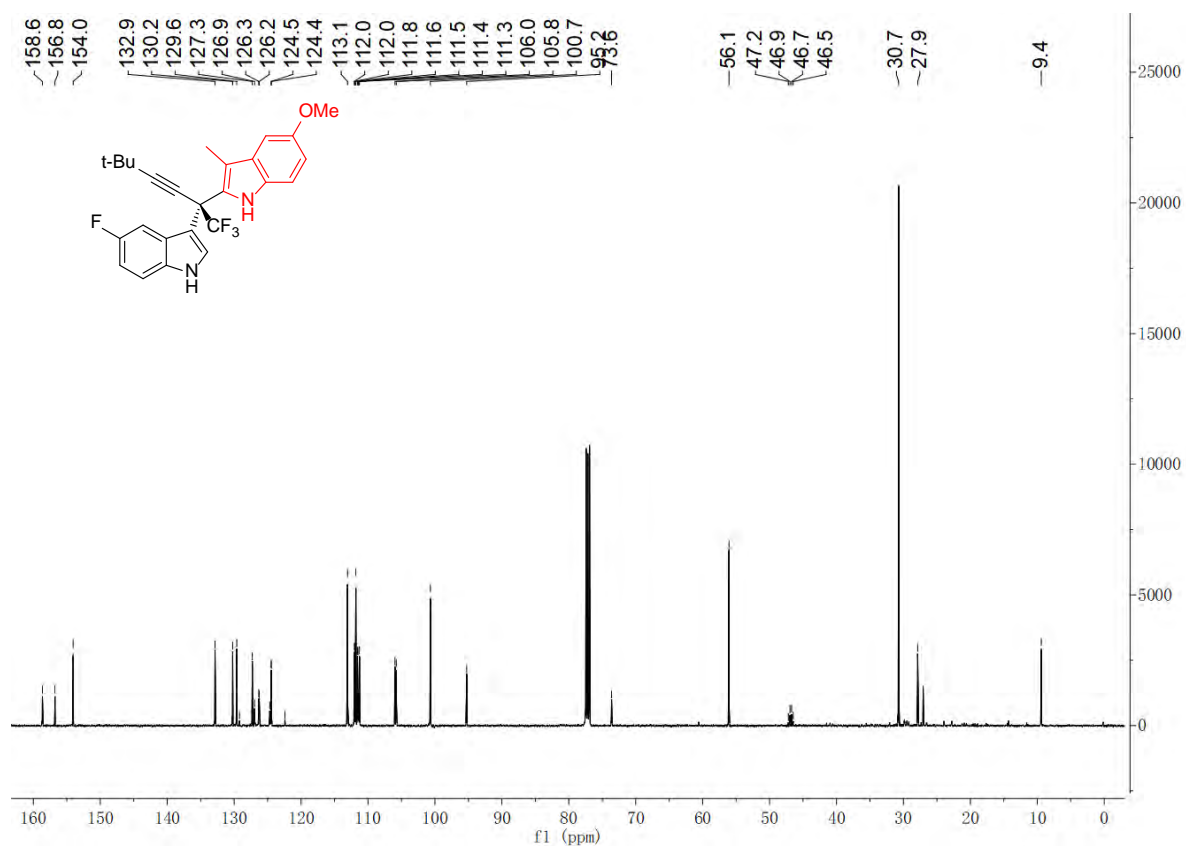

### <sup>19</sup>F NMR of compound 3k (in CDCl<sub>3</sub>)

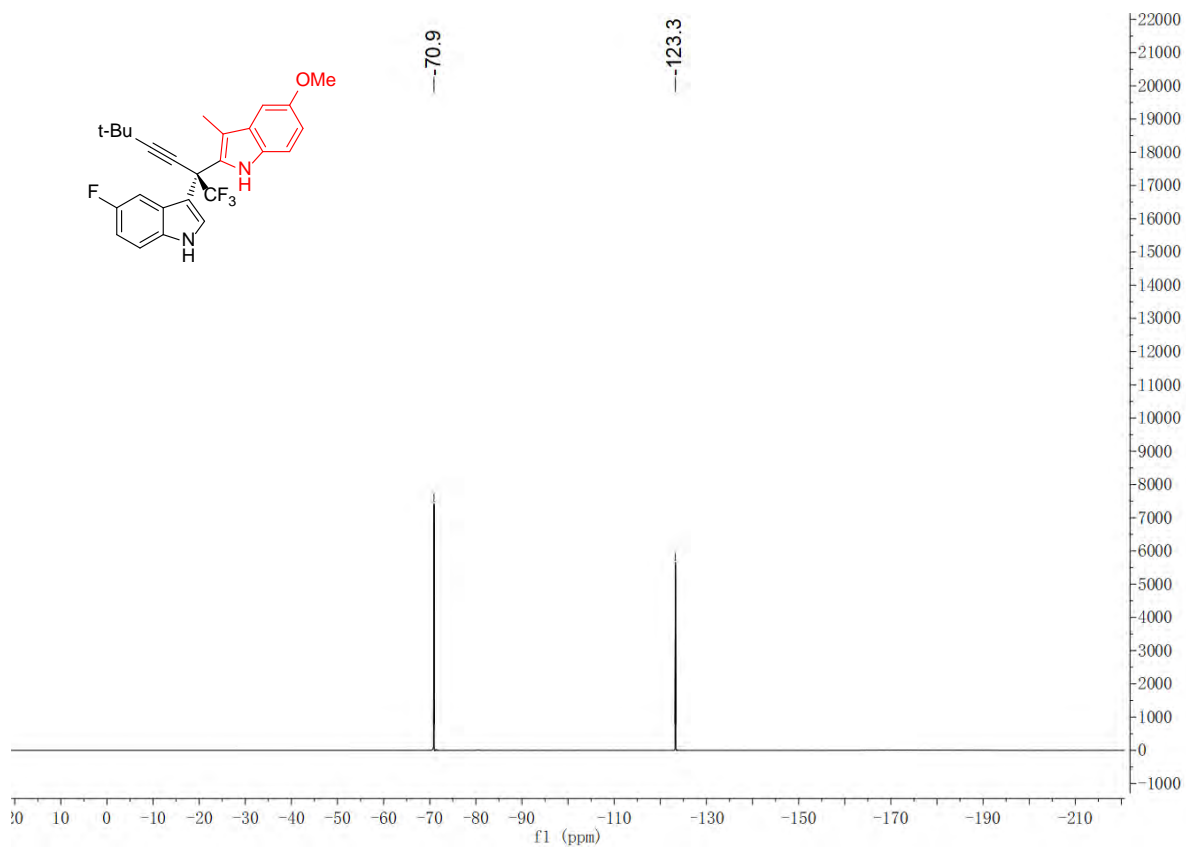

### <sup>1</sup>H NMR of compound 3I (in CDCl<sub>3</sub>)

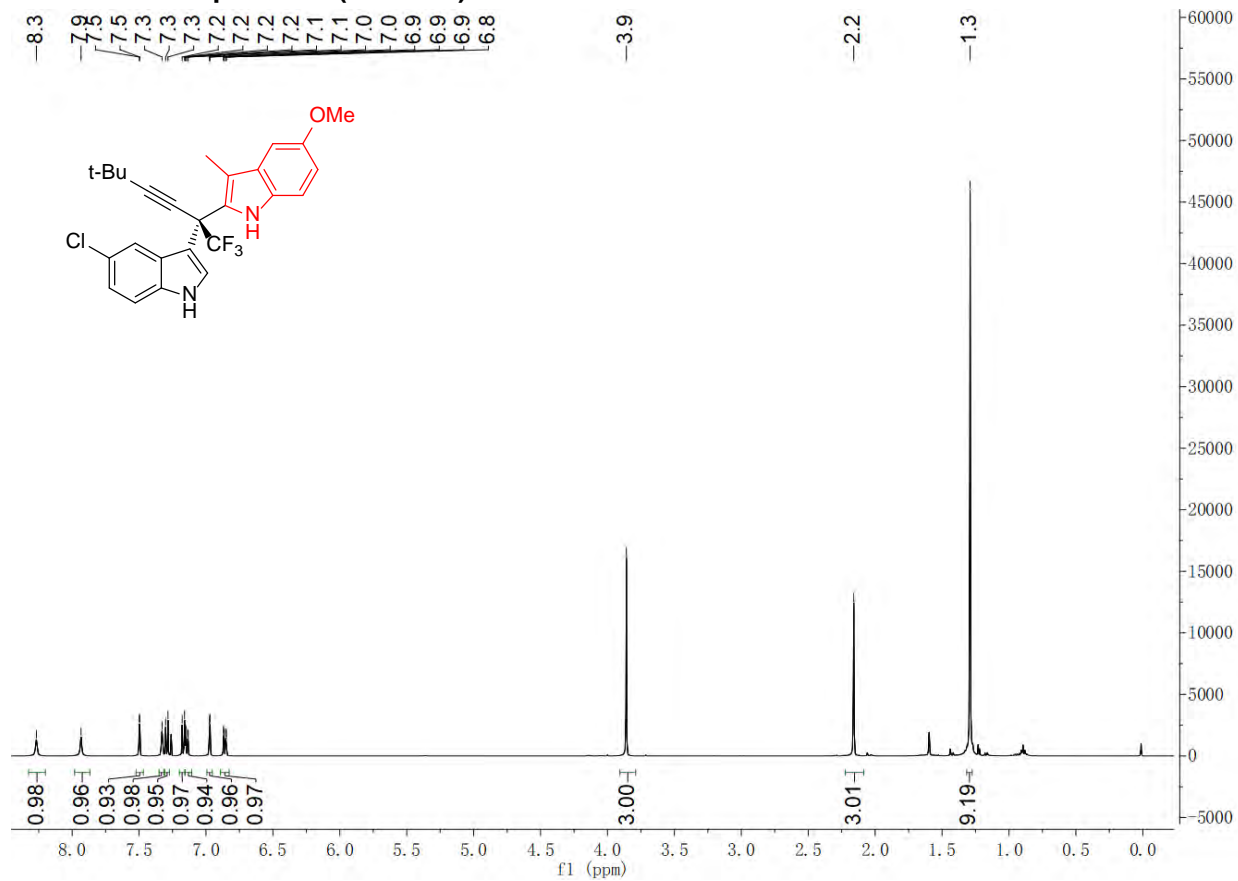

### <sup>13</sup>C NMR of compound 3I (in CDCl<sub>3</sub>)

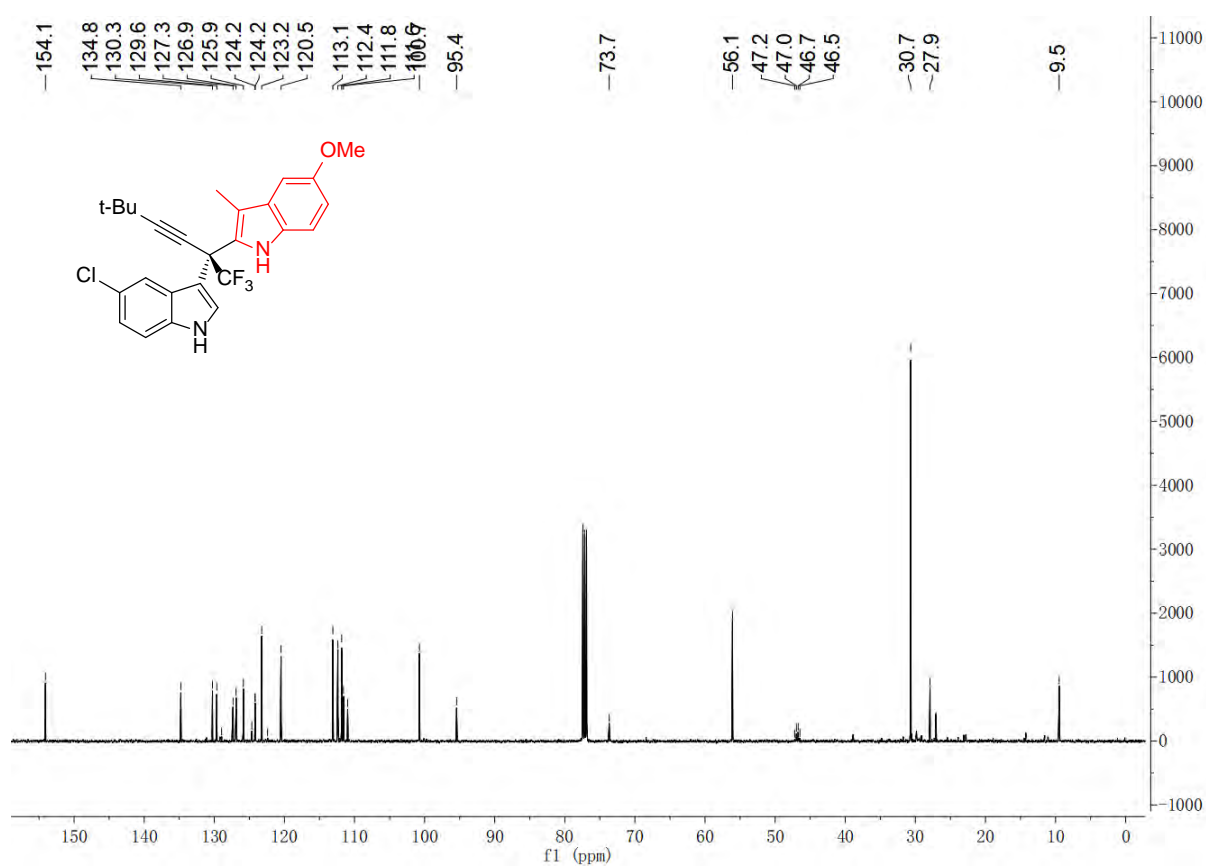

### $^{19}\text{F}$ NMR of compound 3l (in $\text{CDCl}_3$ )

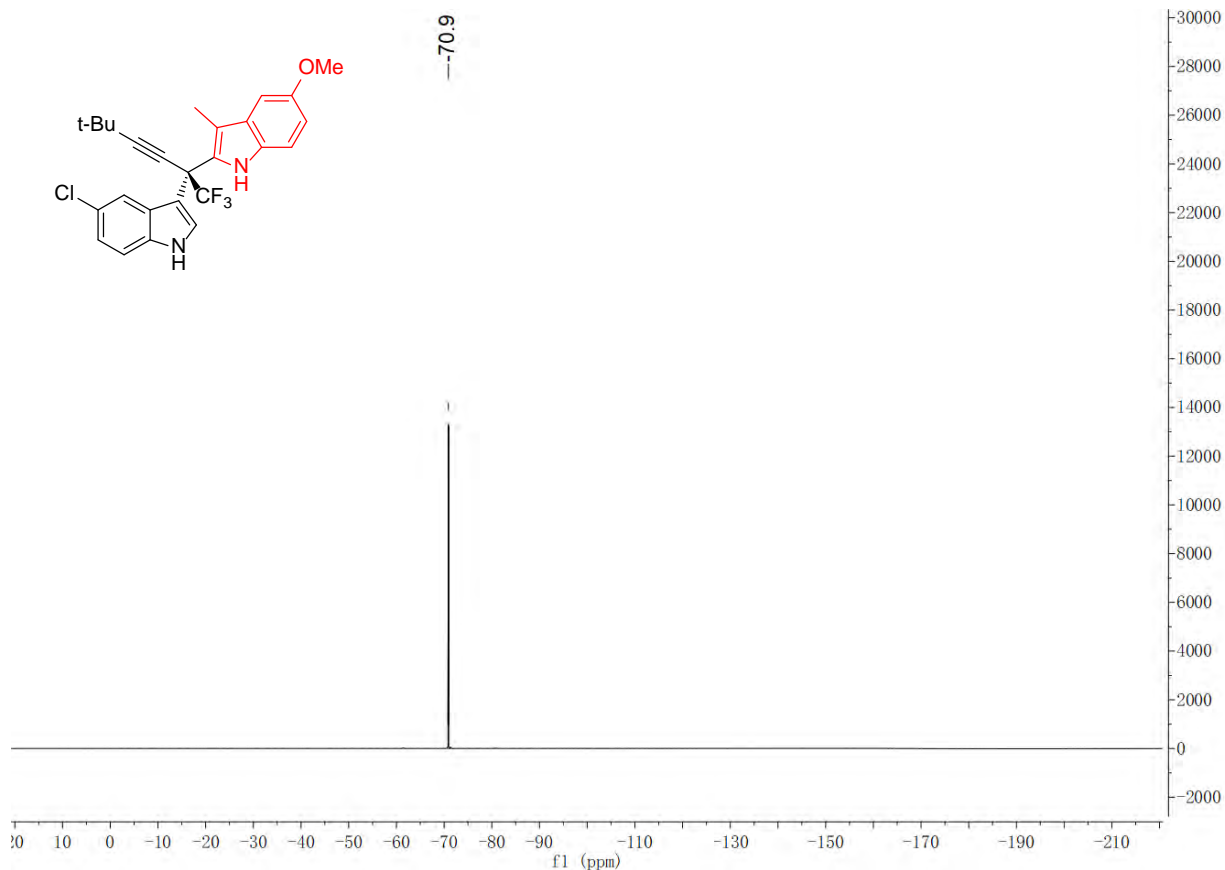

### $^1\text{H}$ NMR of compound 3m (in $\text{CDCl}_3$ )

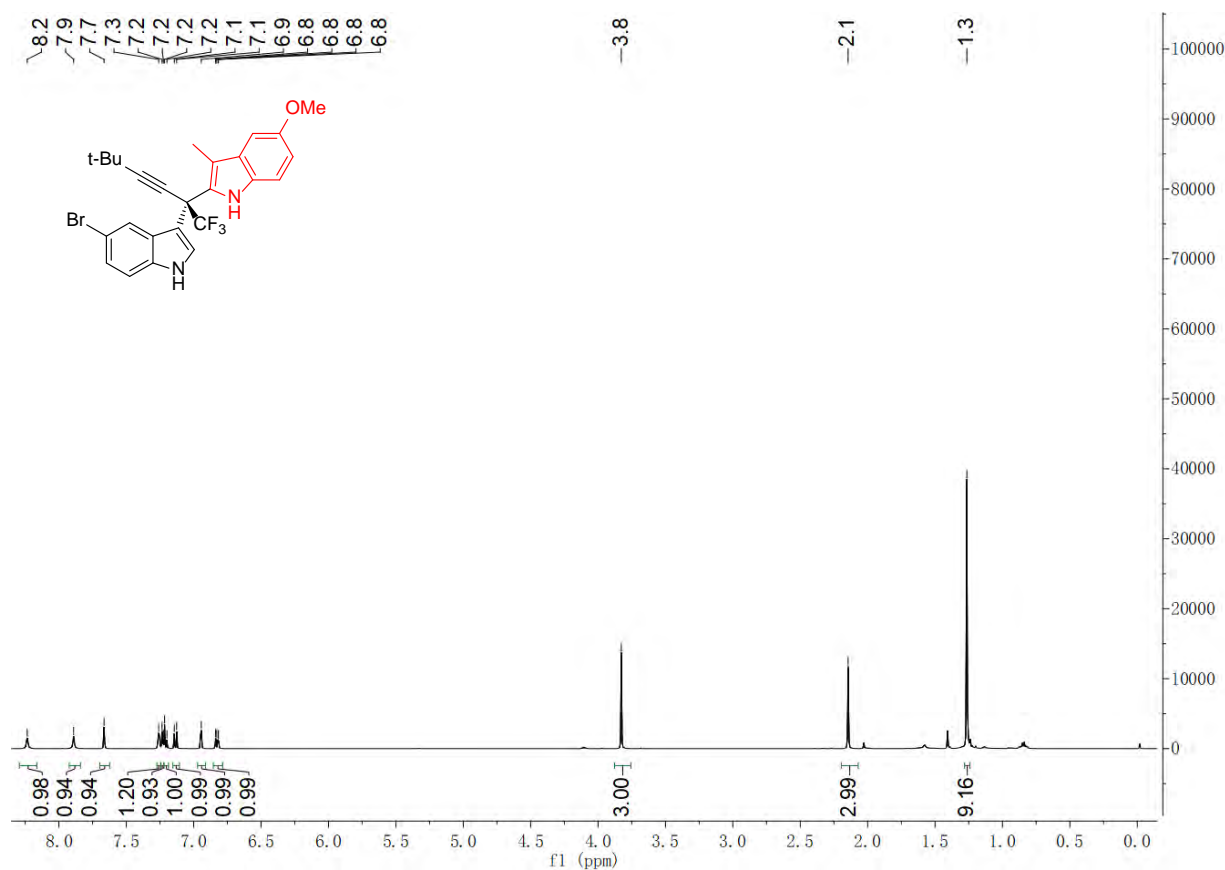

### <sup>13</sup>C NMR of compound 3m (in CDCl<sub>3</sub>)

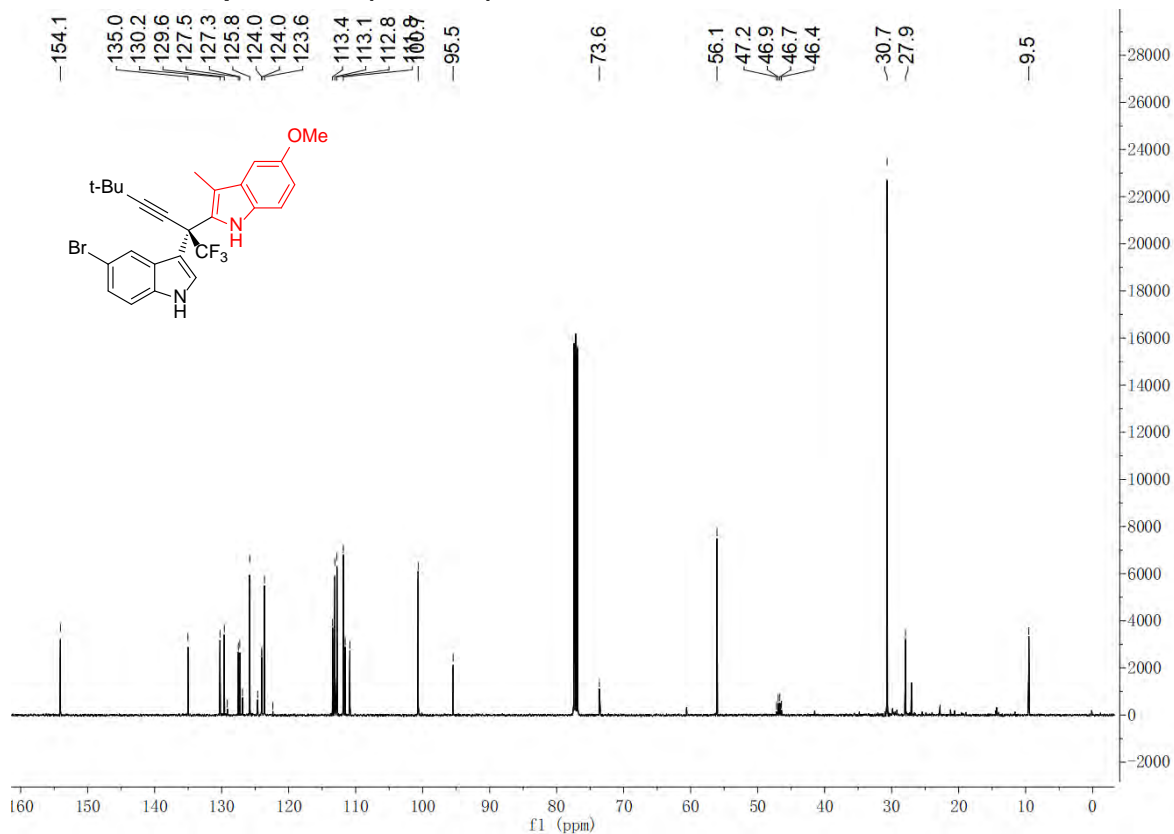

### <sup>19</sup>F NMR of compound 3m (in CDCl<sub>3</sub>)

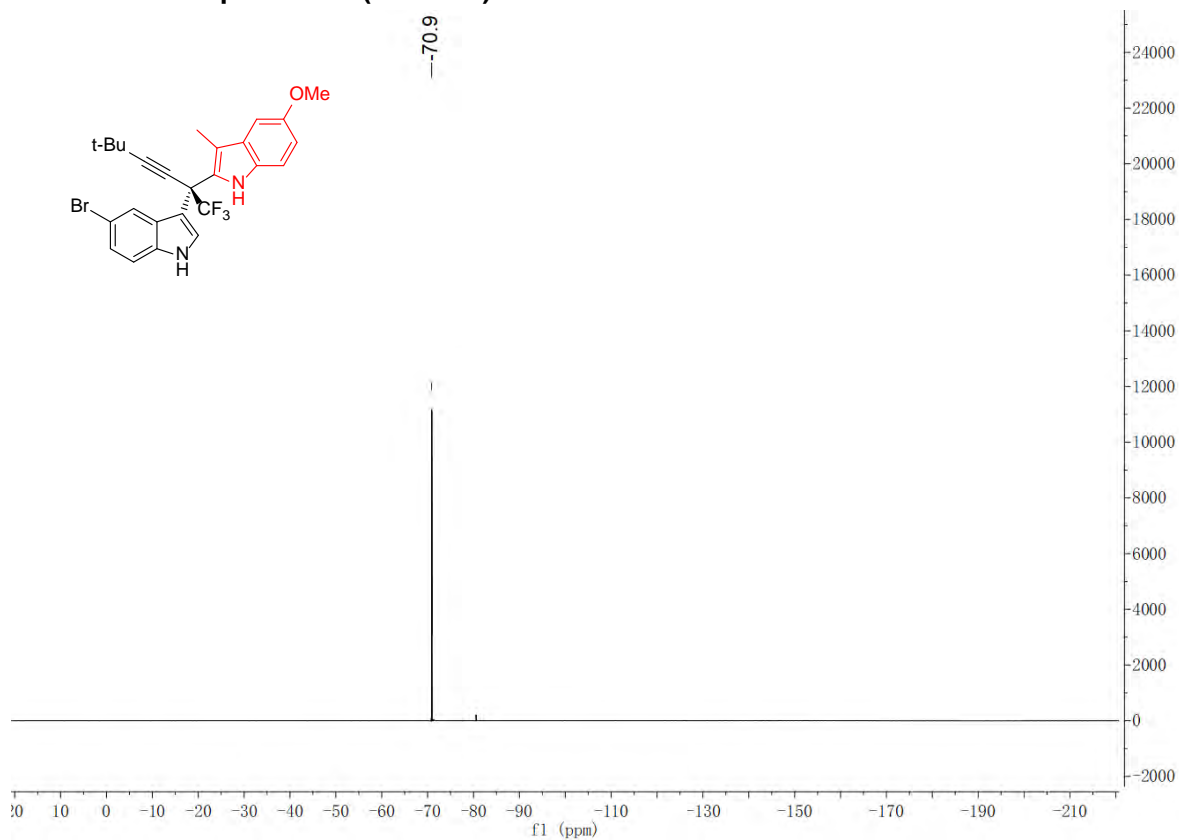

### <sup>1</sup>H NMR of compound 3n (in CDCl<sub>3</sub>)

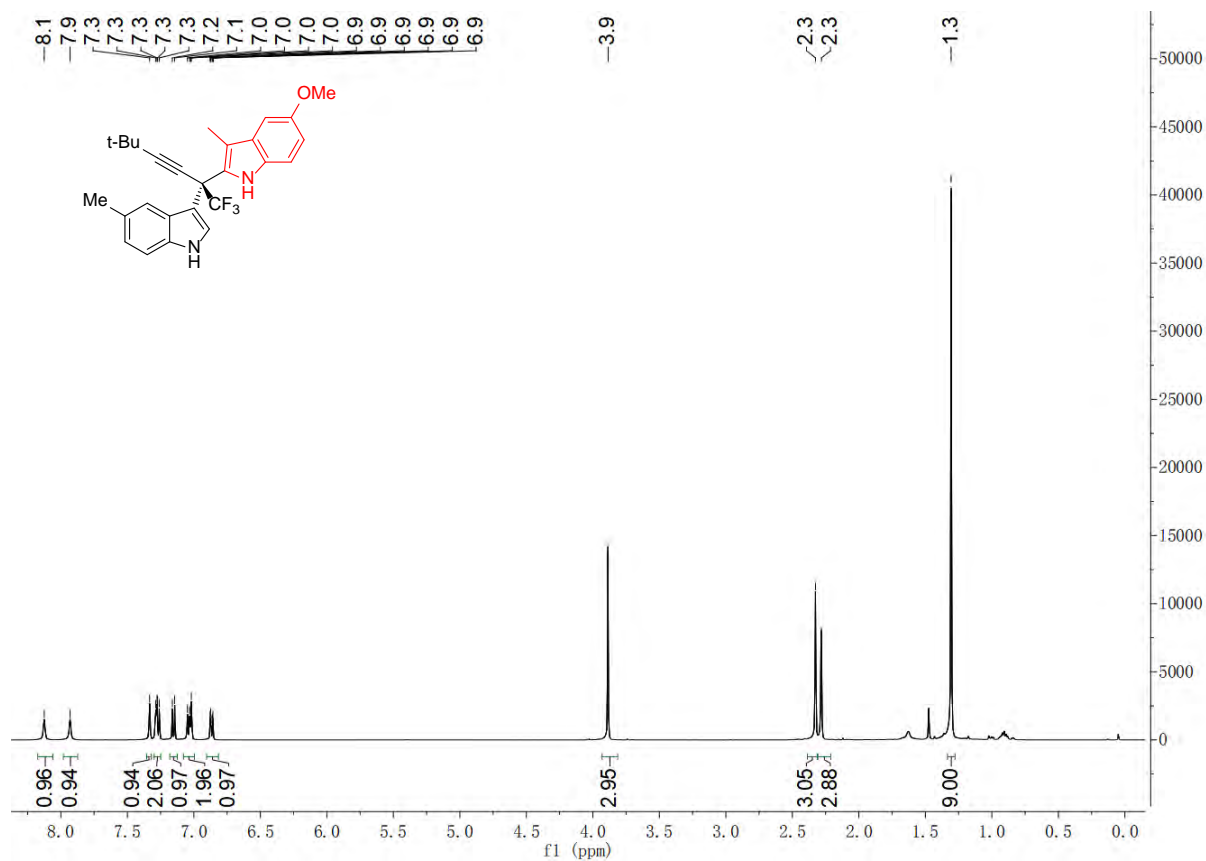

### <sup>13</sup>C NMR of compound 3n (in CDCl<sub>3</sub>)

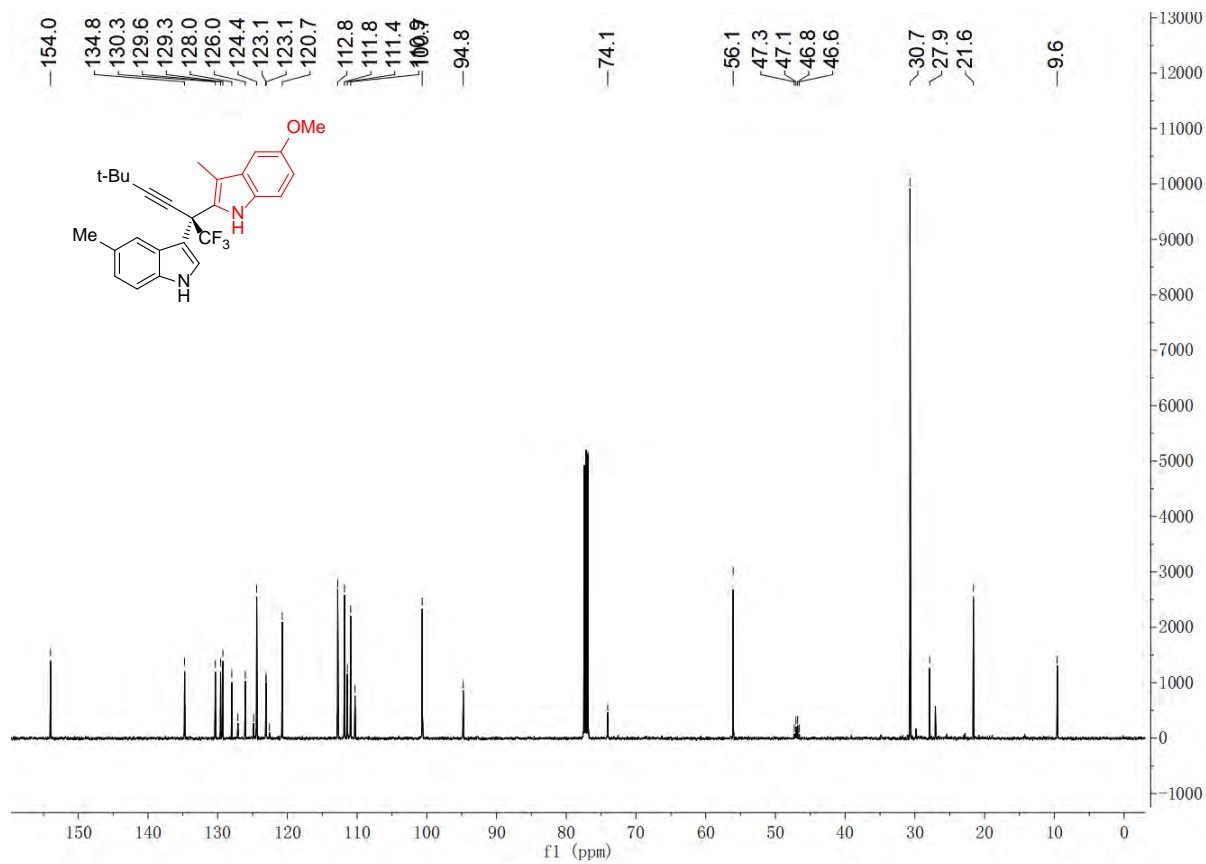

### <sup>19</sup>F NMR of compound 3n (in CDCl<sub>3</sub>)

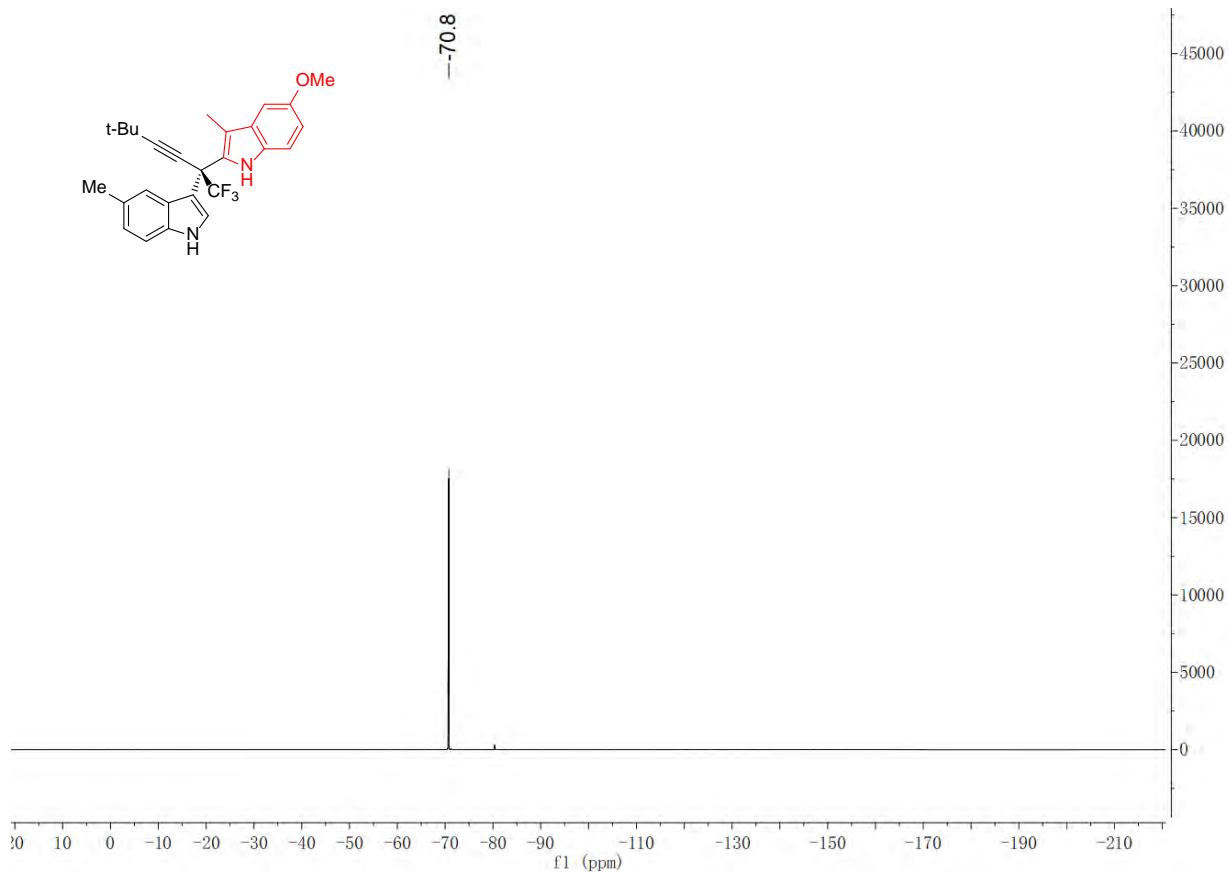

### <sup>1</sup>H NMR of compound 3o (in CDCl<sub>3</sub>)

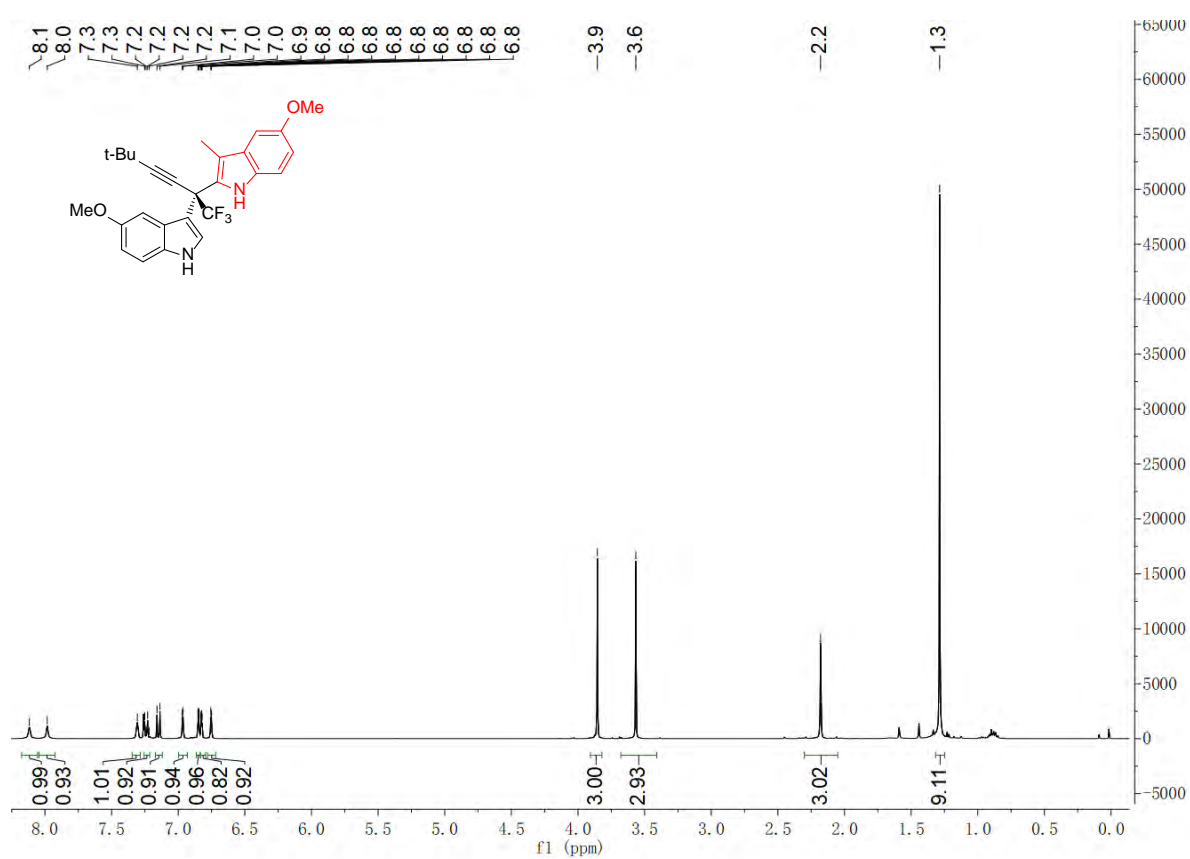

### <sup>13</sup>C NMR of compound 3o (in CDCl<sub>3</sub>)

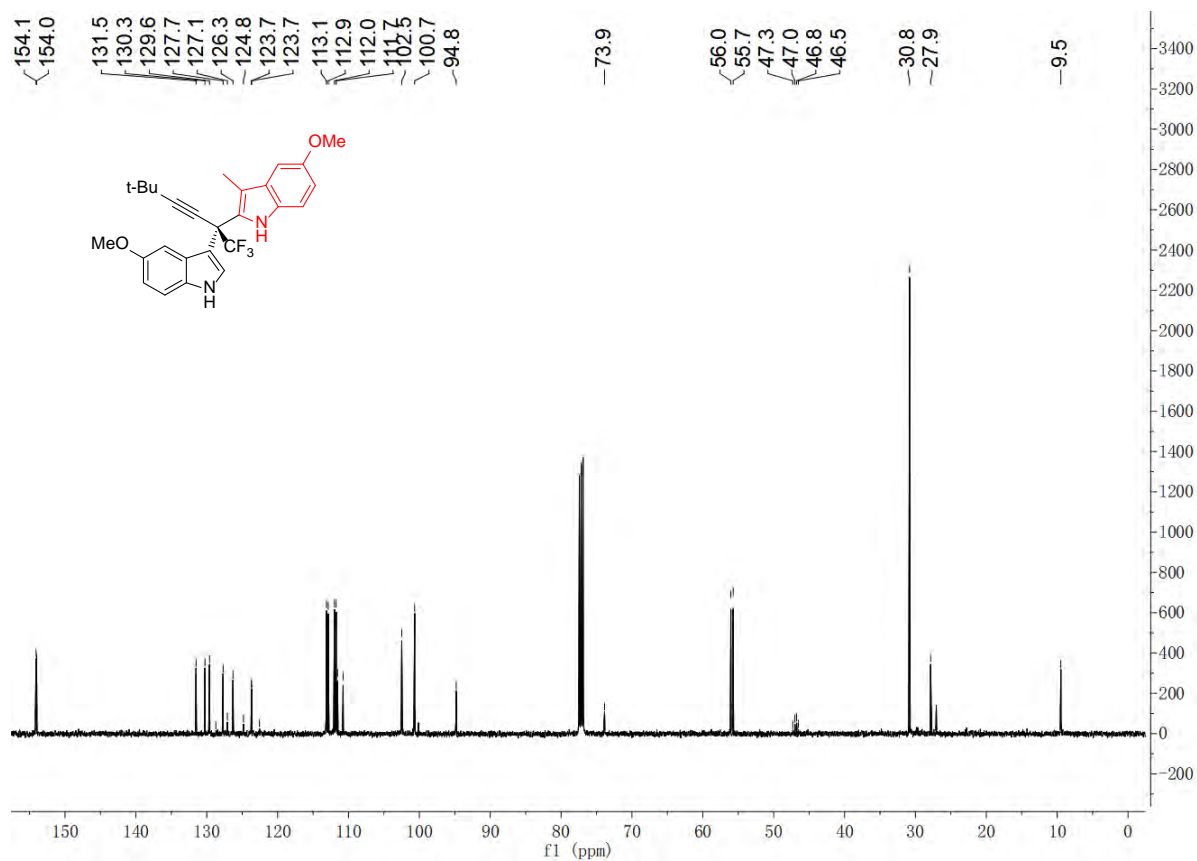

### <sup>19</sup>F NMR of compound 3o (in CDCl<sub>3</sub>)

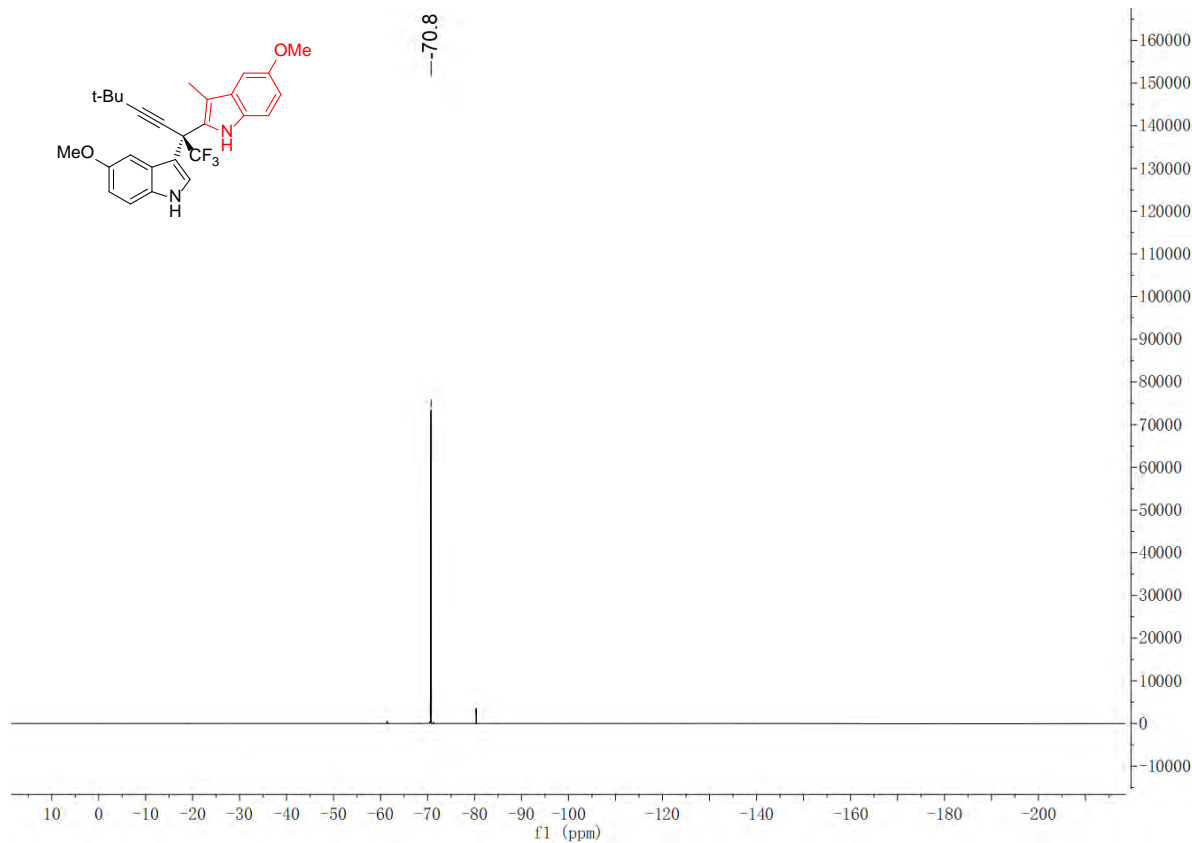



### <sup>1</sup>H NMR of compound 3p (in CDCl<sub>3</sub>)

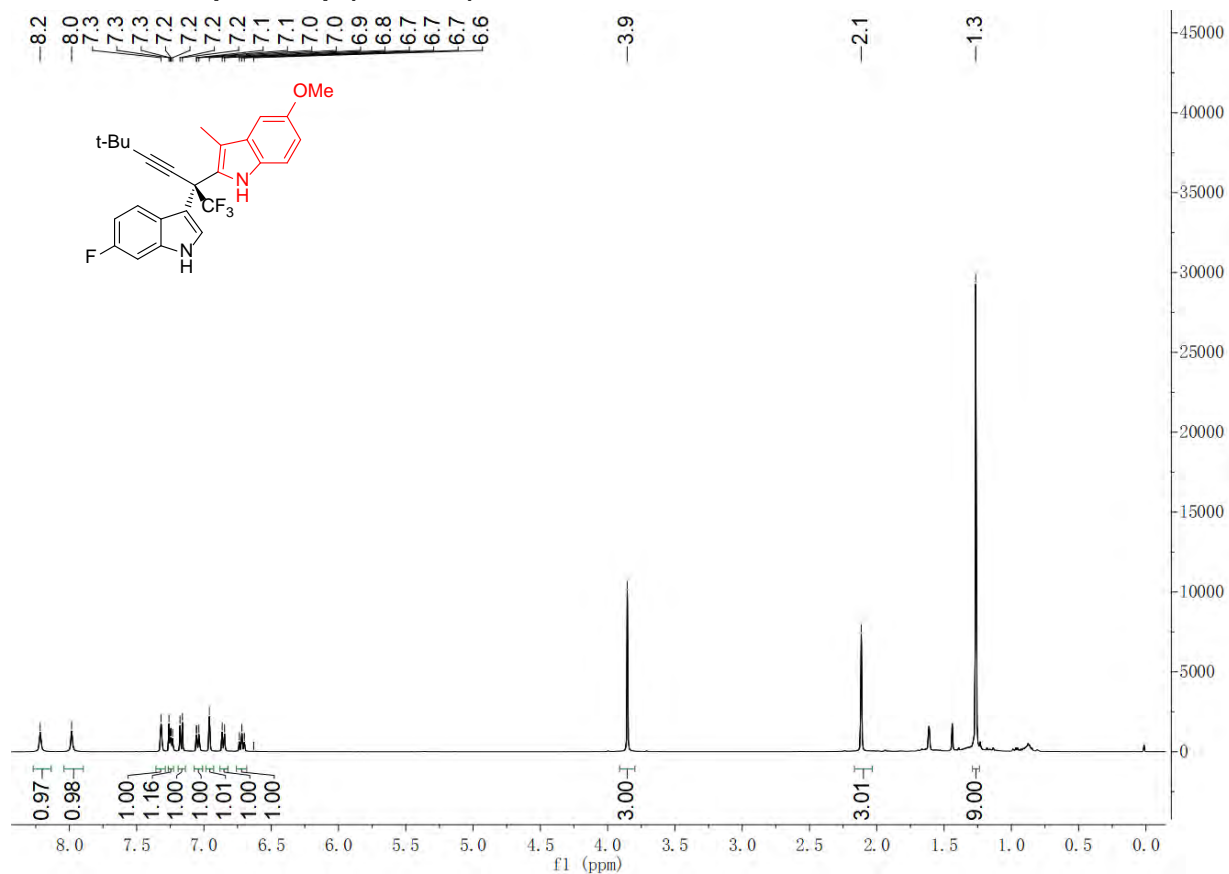

### <sup>13</sup>C NMR of compound 3p (in CDCl<sub>3</sub>)

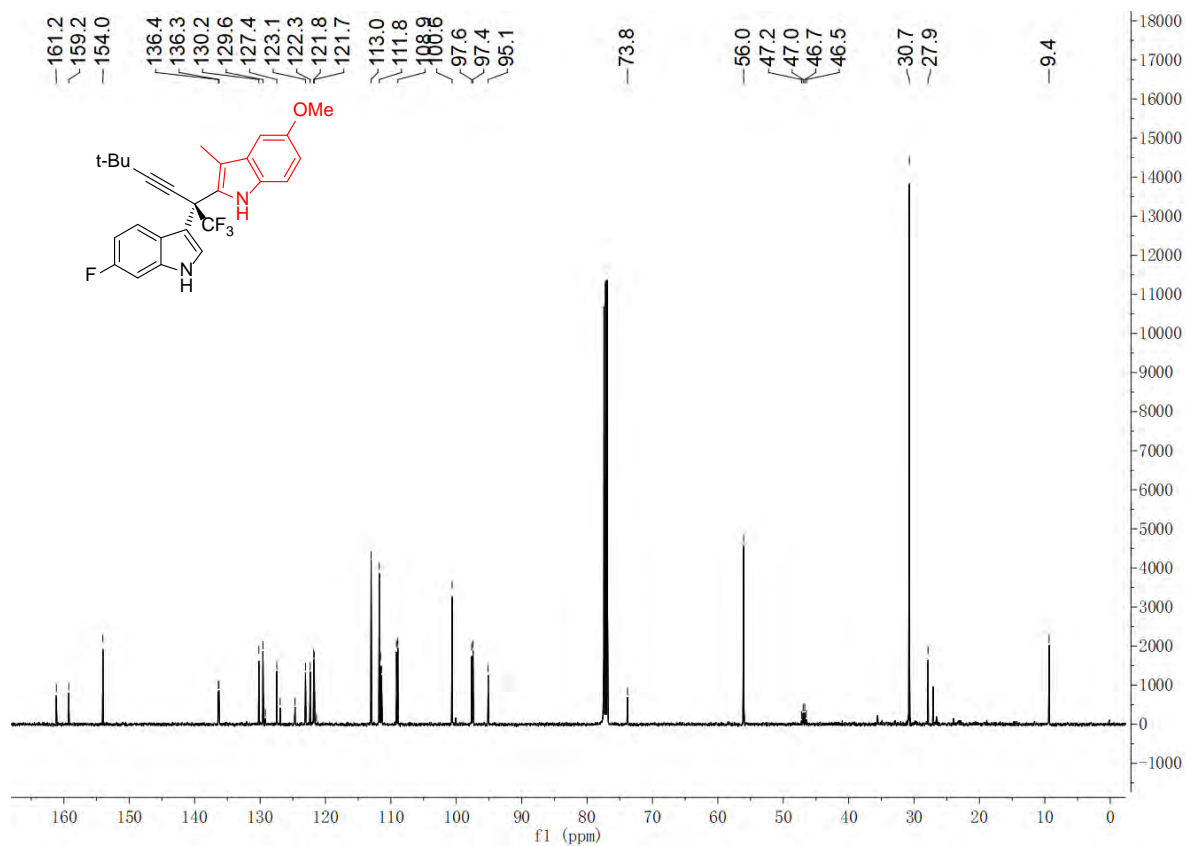

**<sup>19</sup>F NMR of compound 3p (in CDCl<sub>3</sub>)**

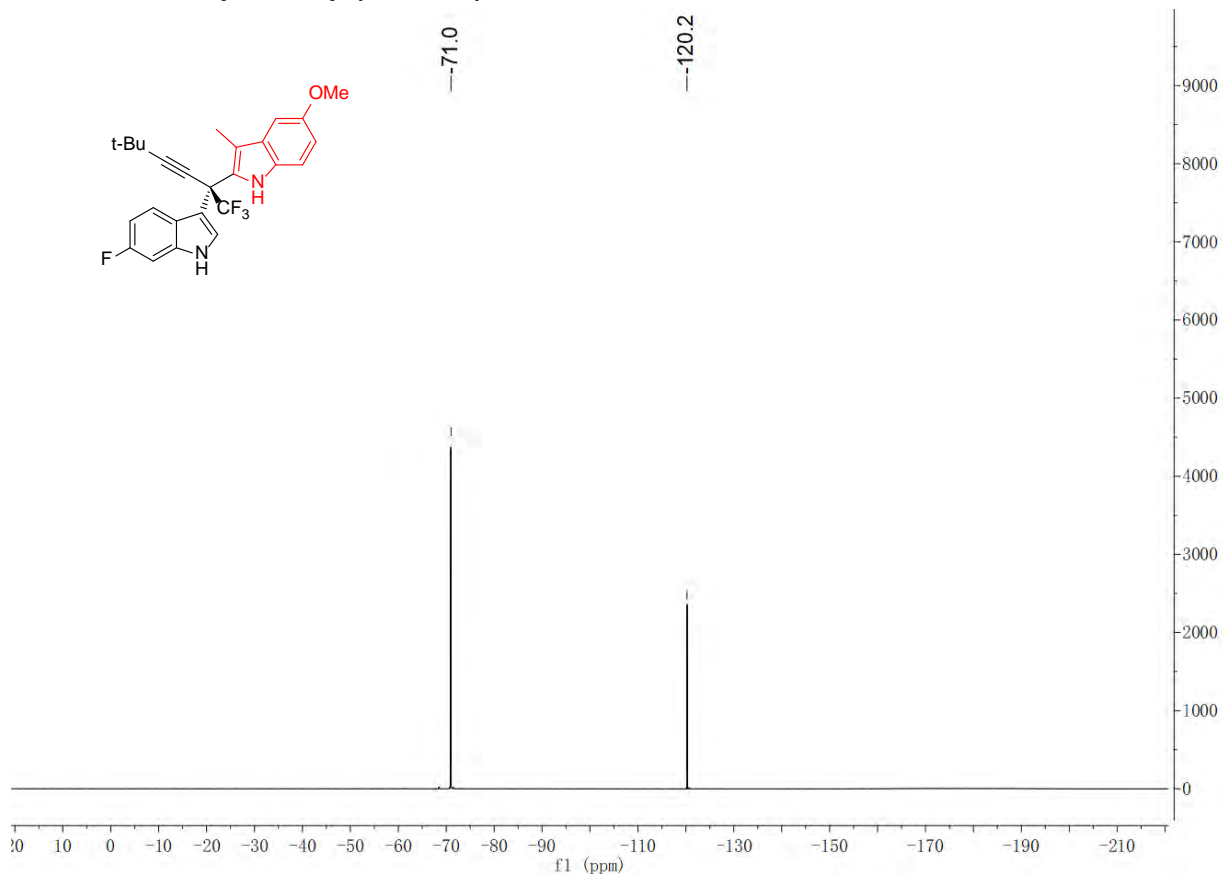

**<sup>1</sup>H NMR of compound 3q (in CDCl<sub>3</sub>)**

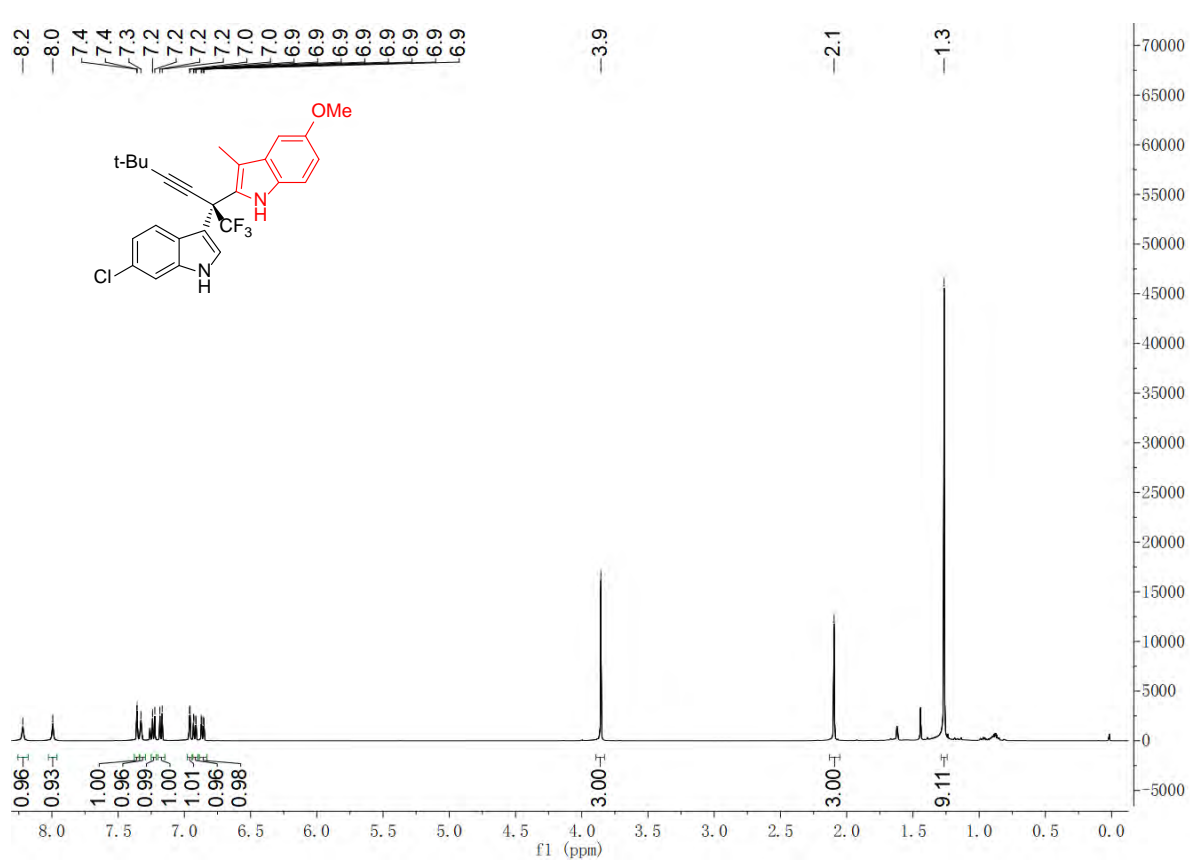

### <sup>13</sup>C NMR of compound 3q (in CDCl<sub>3</sub>)

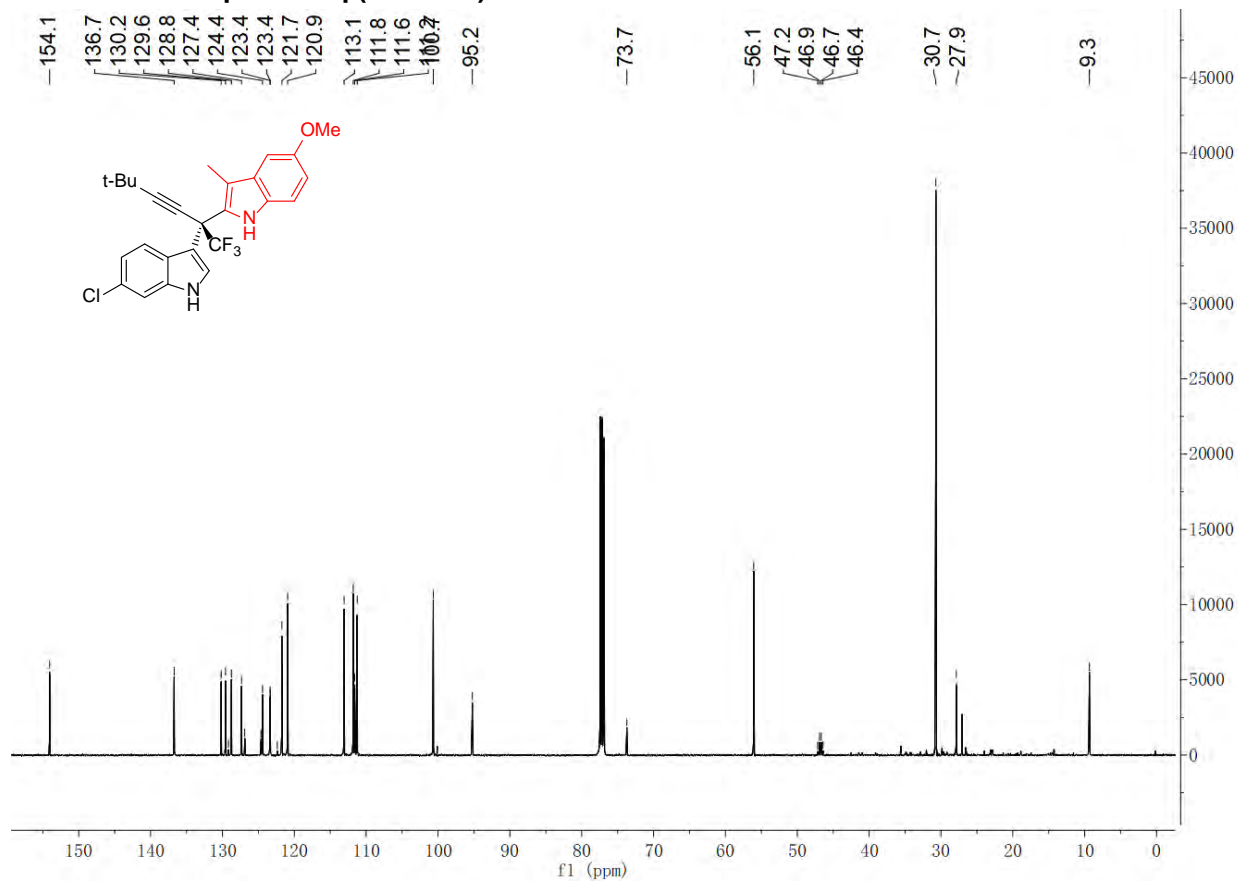

### <sup>19</sup>F NMR of compound 3q (in CDCl<sub>3</sub>)

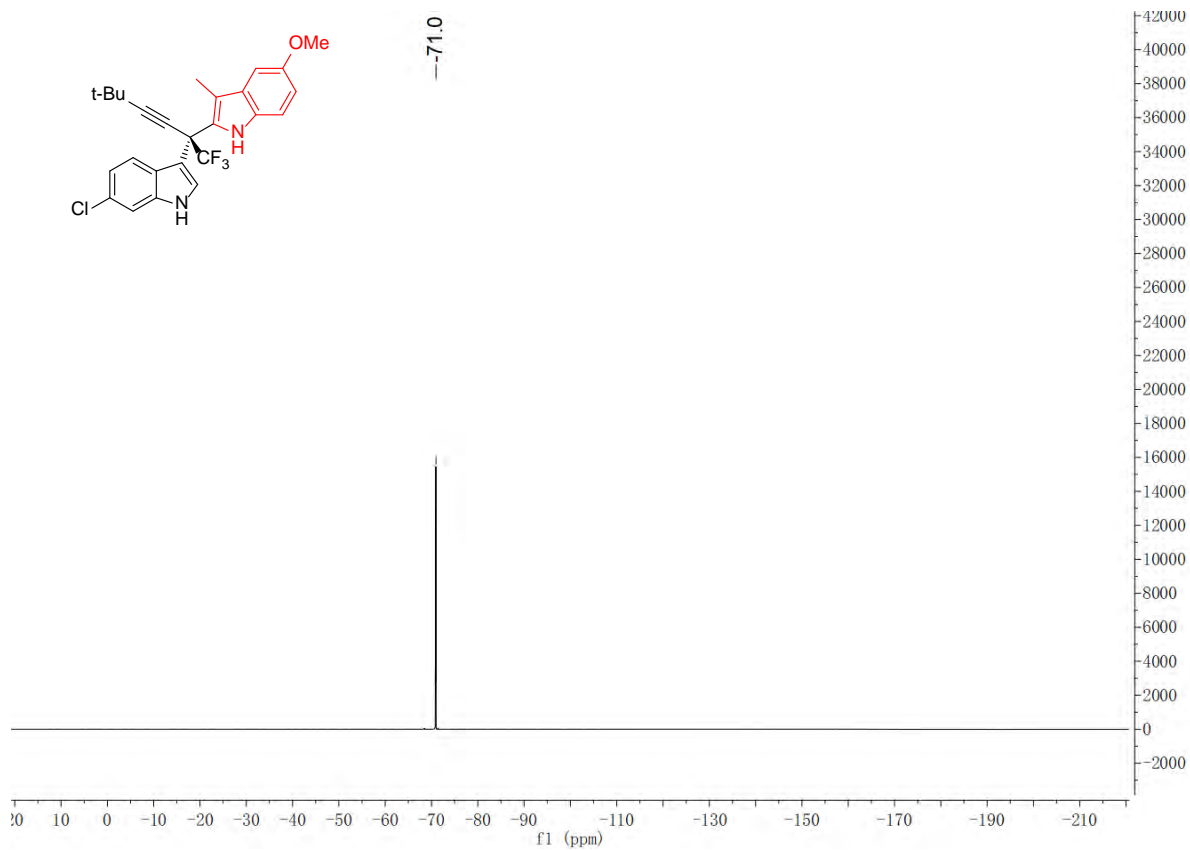

### <sup>1</sup>H NMR of compound 3r (in CDCl<sub>3</sub>)

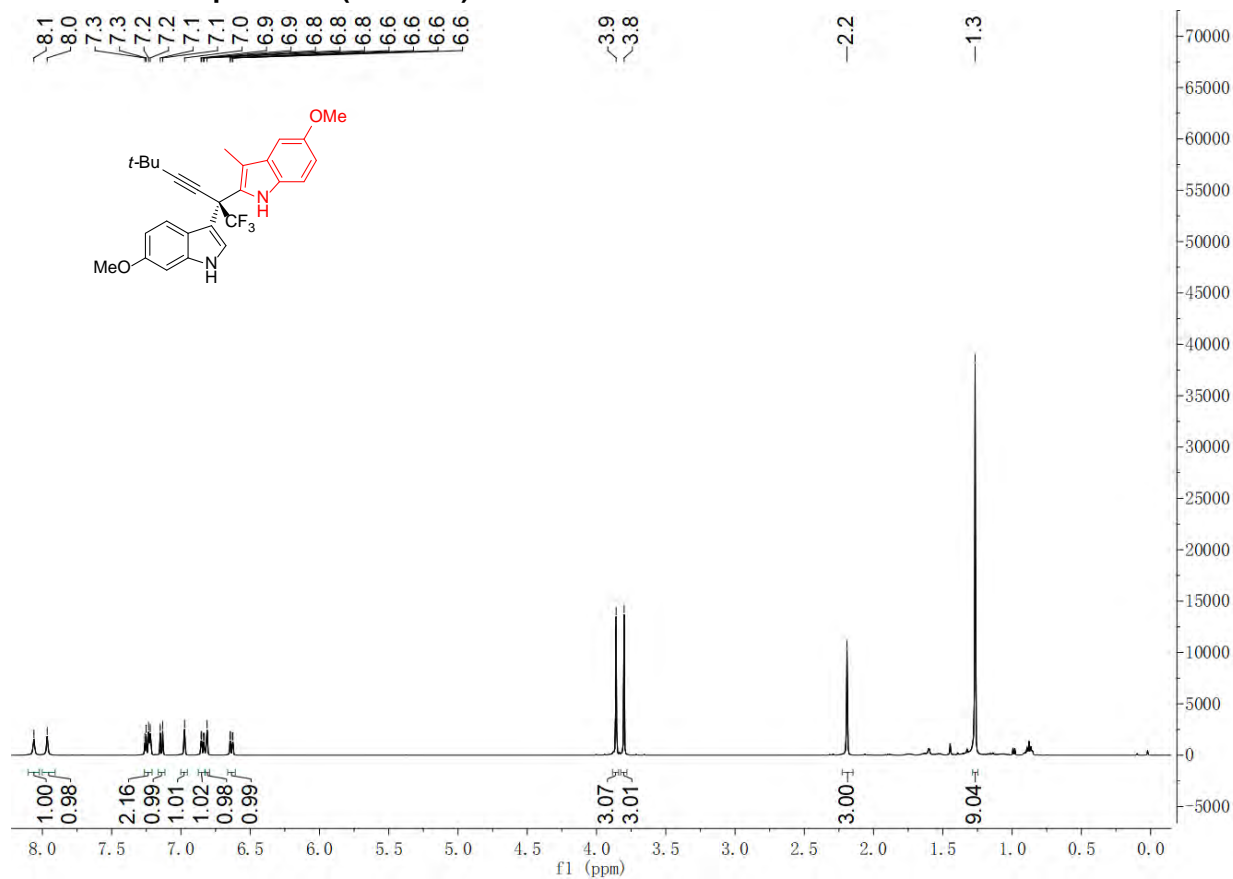

### <sup>13</sup>C NMR of compound 3r (in CDCl<sub>3</sub>)

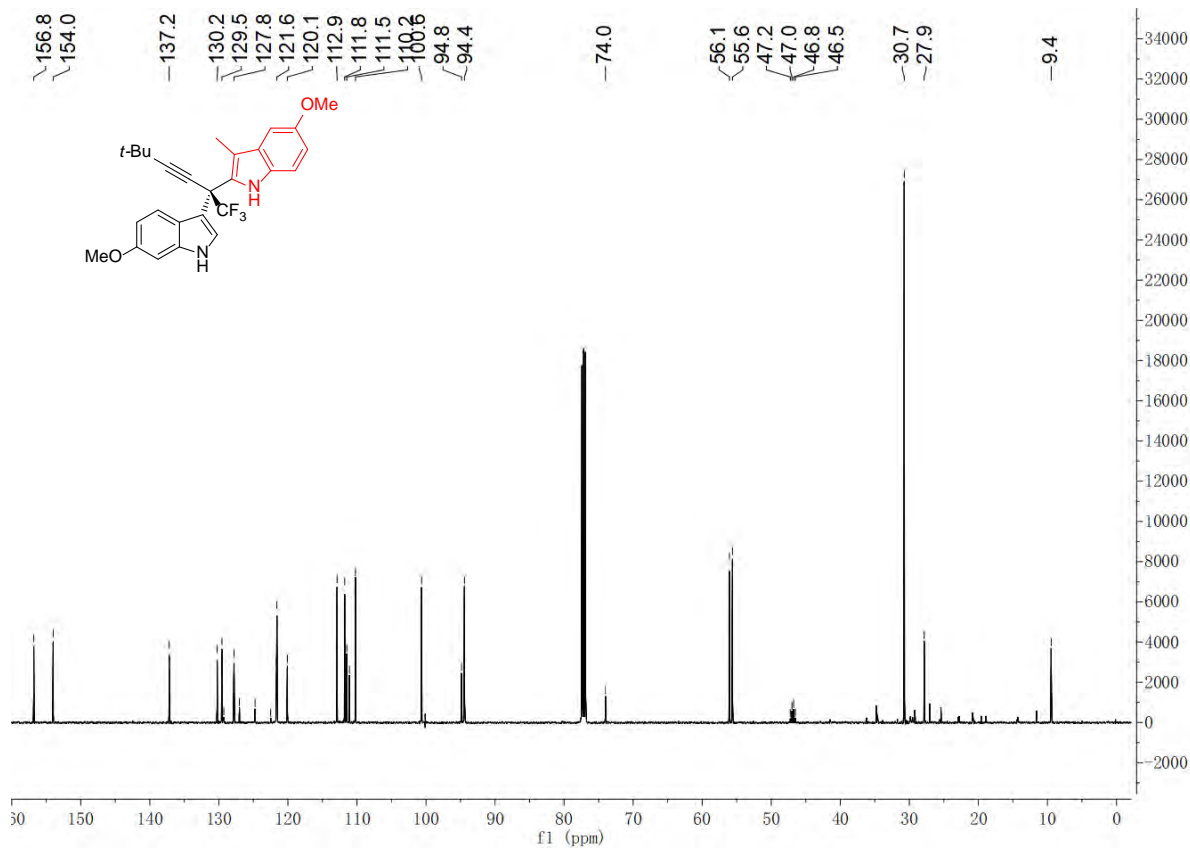

### $^{19}\text{F}$ NMR of compound 3r (in $\text{CDCl}_3$ )

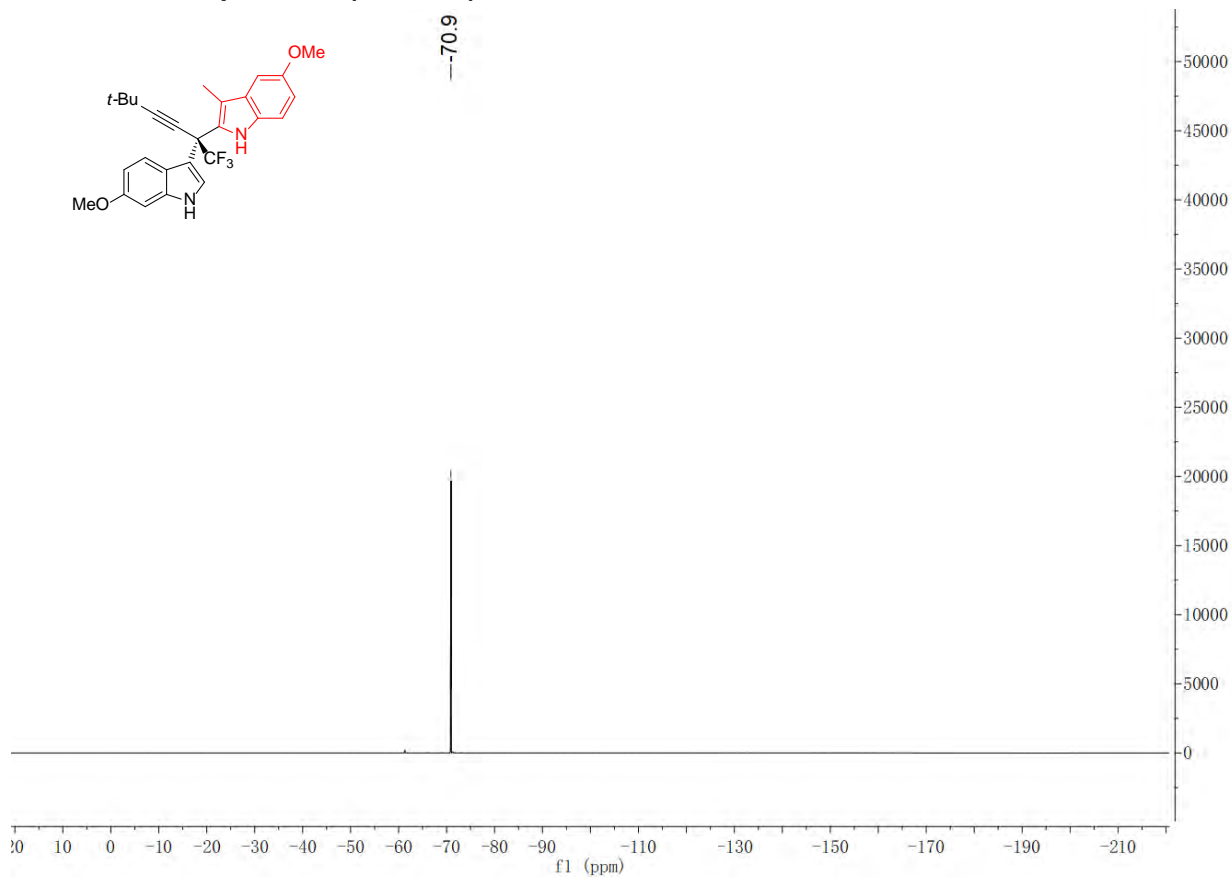

### $^1\text{H}$ NMR of compound 3s (in $\text{CDCl}_3$ )

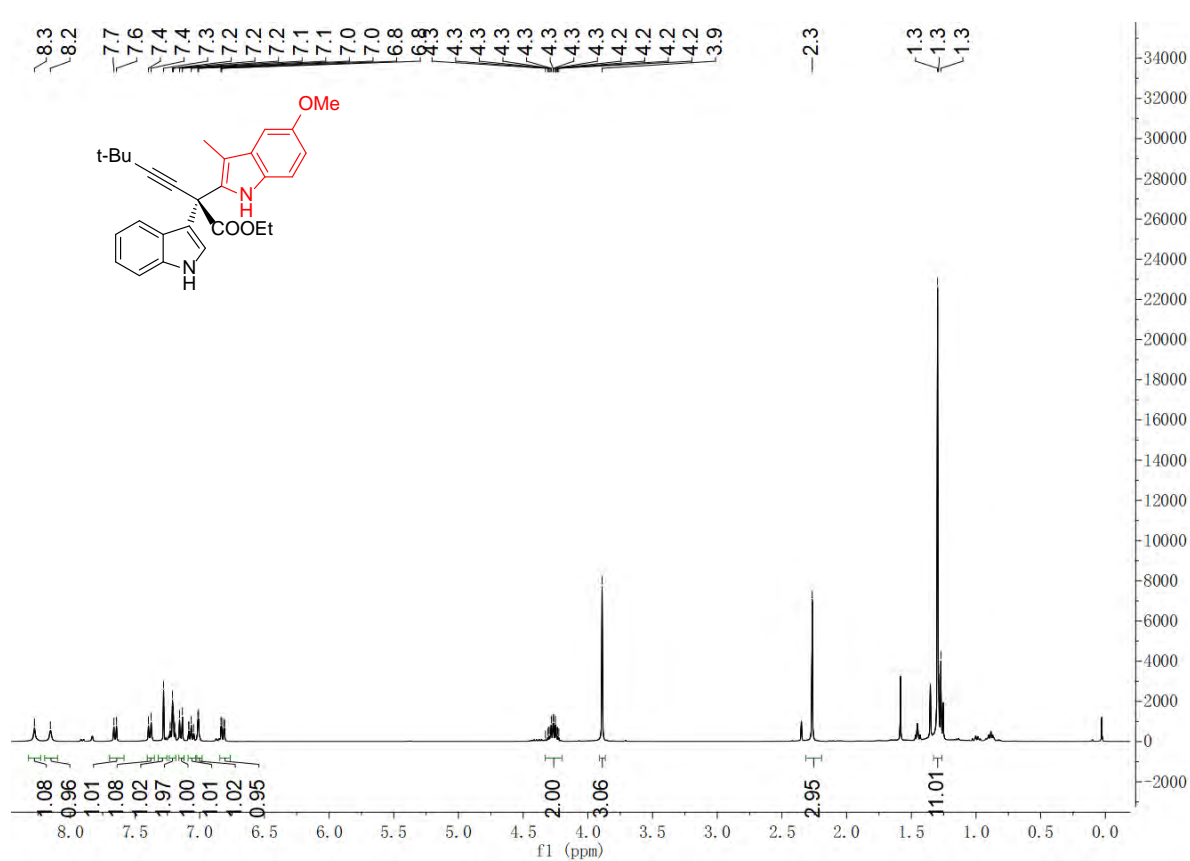

### <sup>13</sup>C NMR of compound 3s (in CDCl<sub>3</sub>)

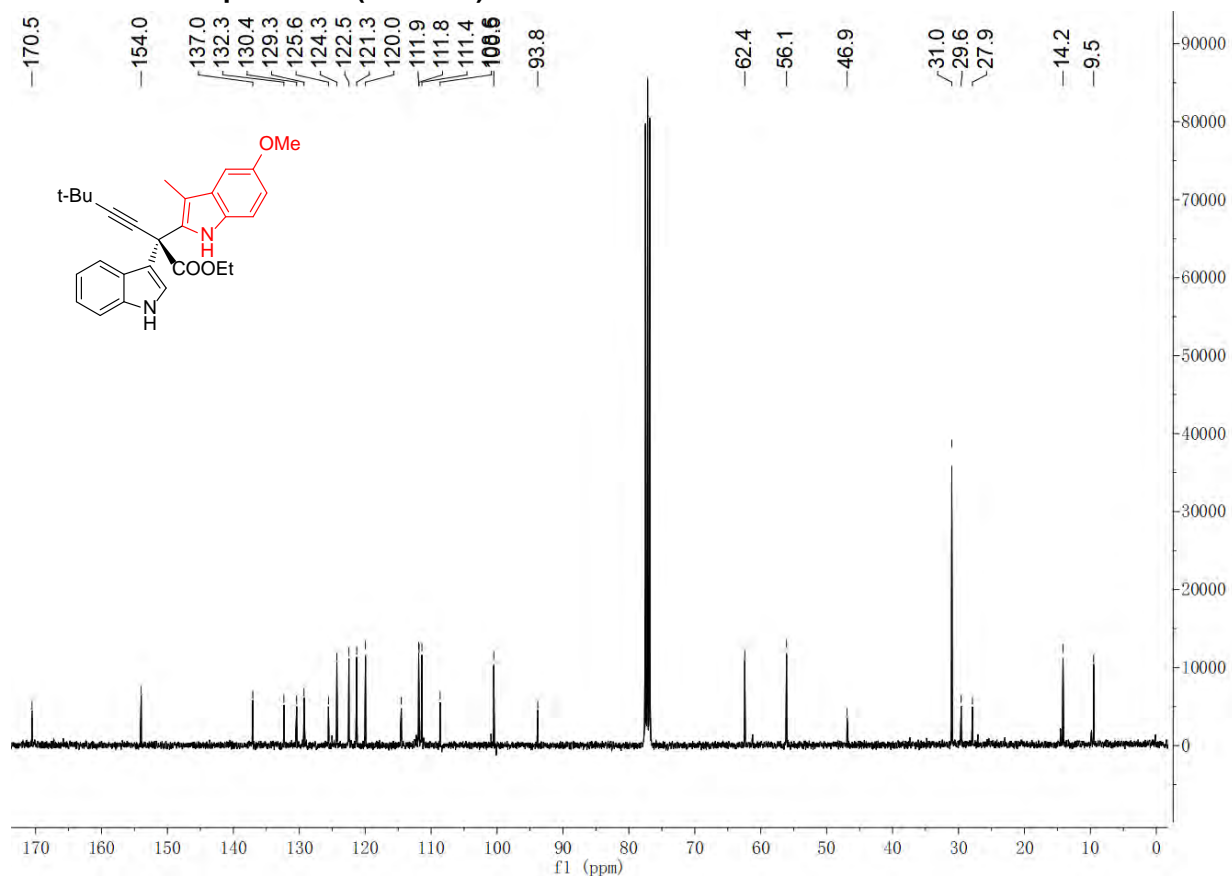

### <sup>1</sup>H NMR of compound 3t (in CDCl<sub>3</sub>)

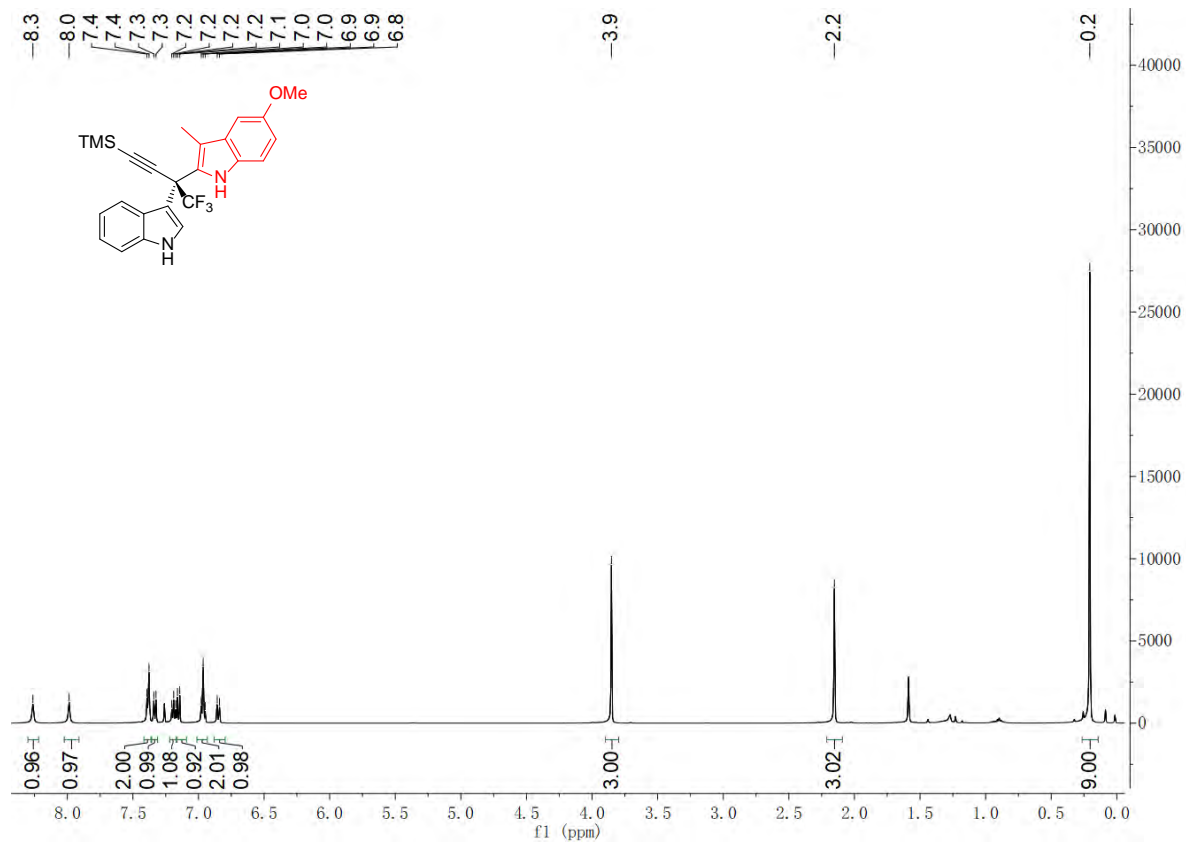

### <sup>13</sup>C NMR of compound 3t (in CDCl<sub>3</sub>)

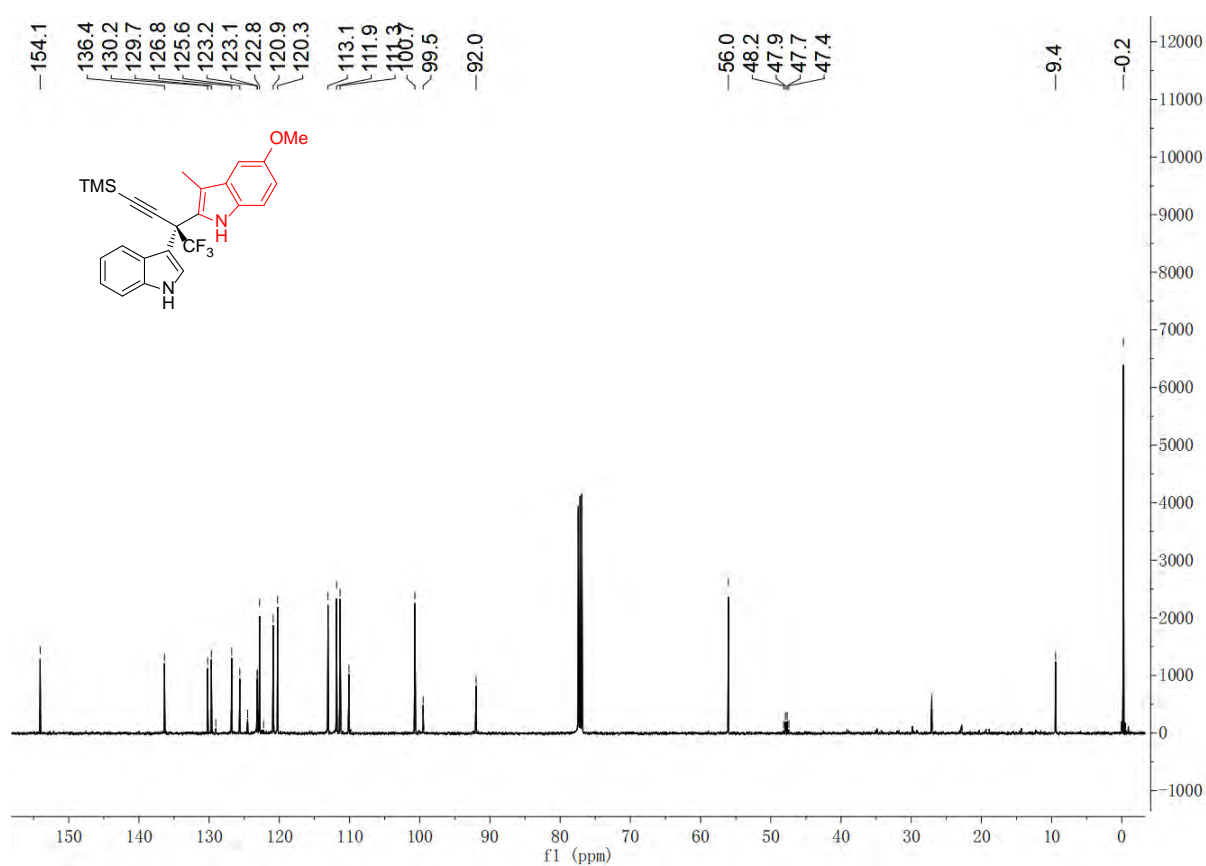

### <sup>19</sup>F NMR of compound 3t (in CDCl<sub>3</sub>)

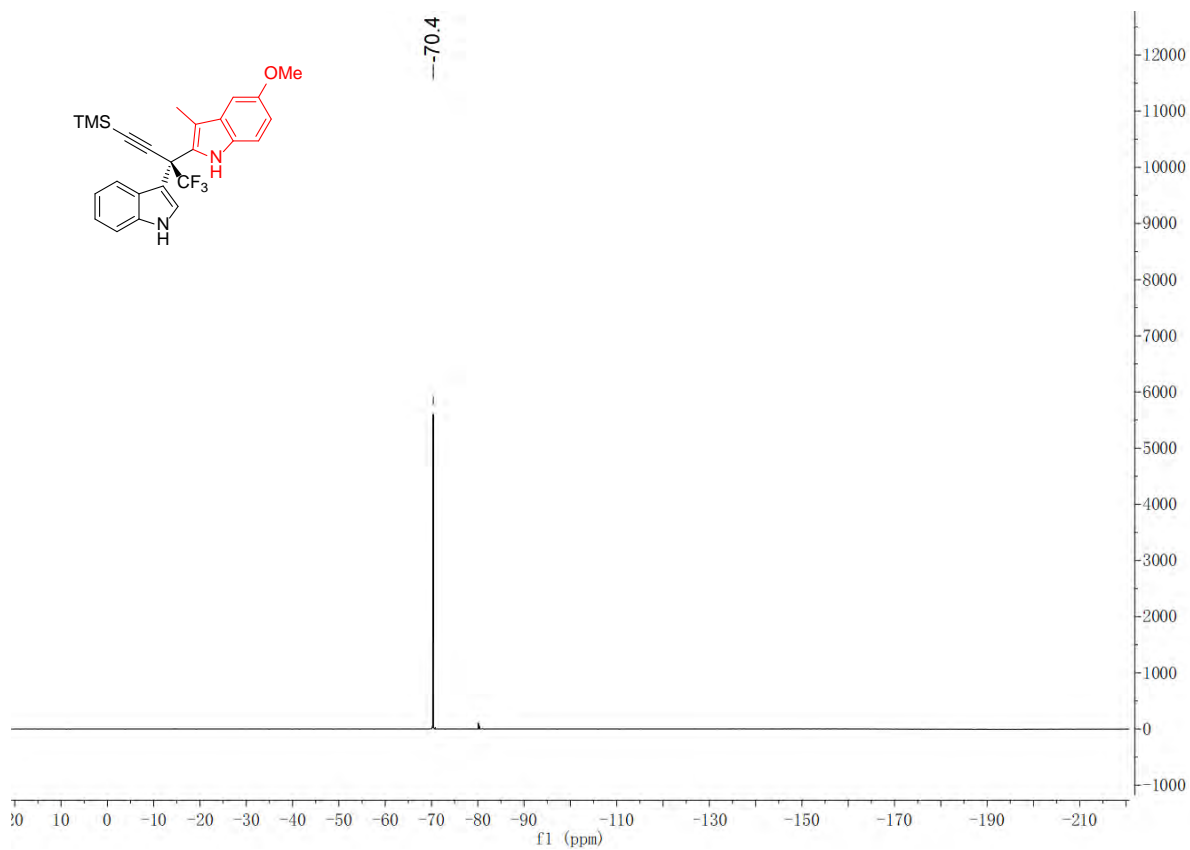



### <sup>1</sup>H NMR of compound 3u (in CDCl<sub>3</sub>)

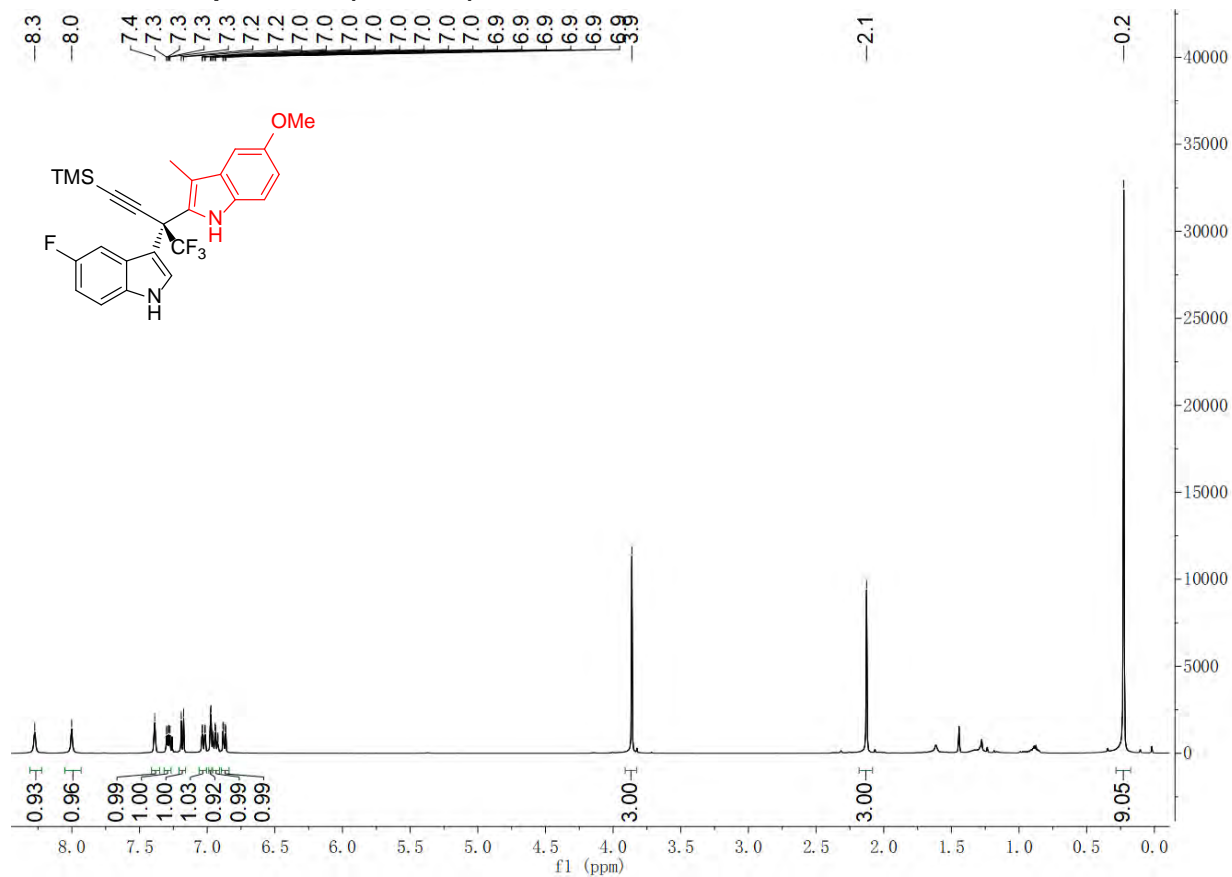

### <sup>13</sup>C NMR of compound 3u (in CDCl<sub>3</sub>)

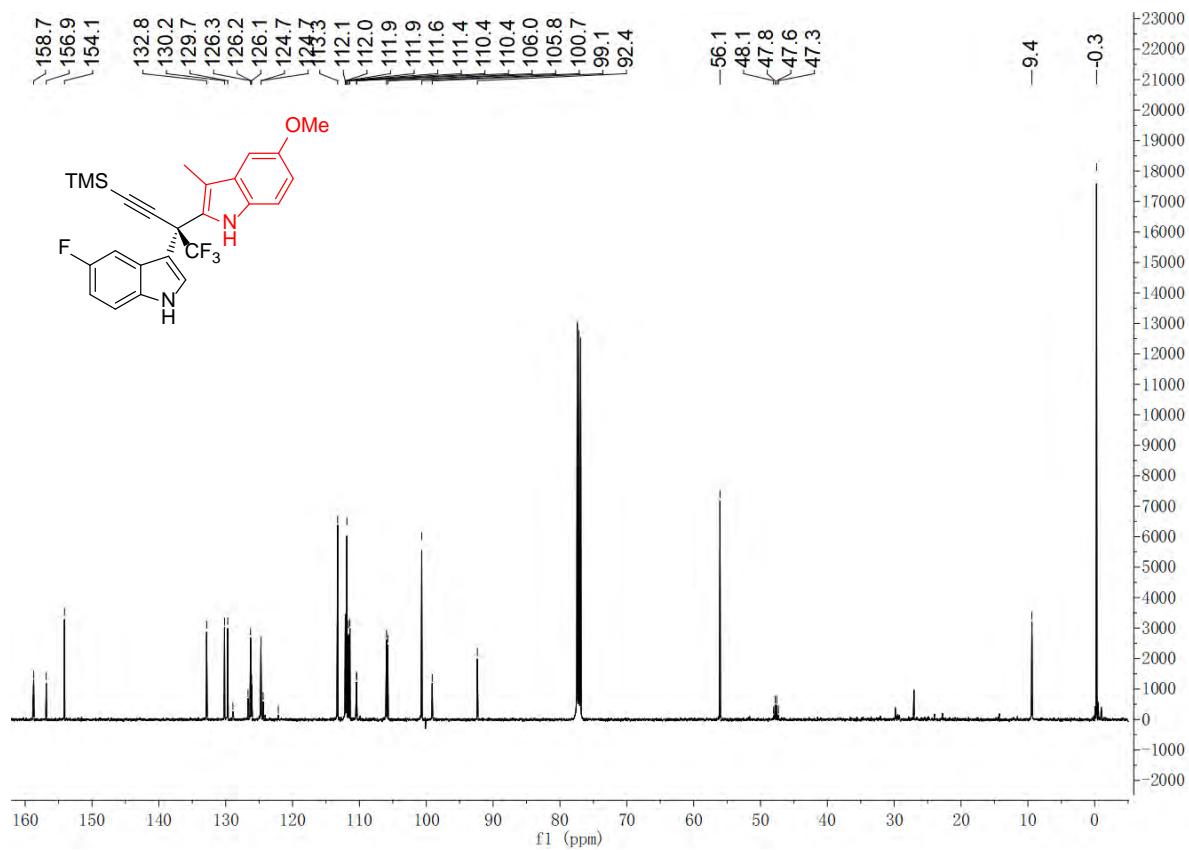



### <sup>19</sup>F NMR of compound 3u (in CDCl<sub>3</sub>)

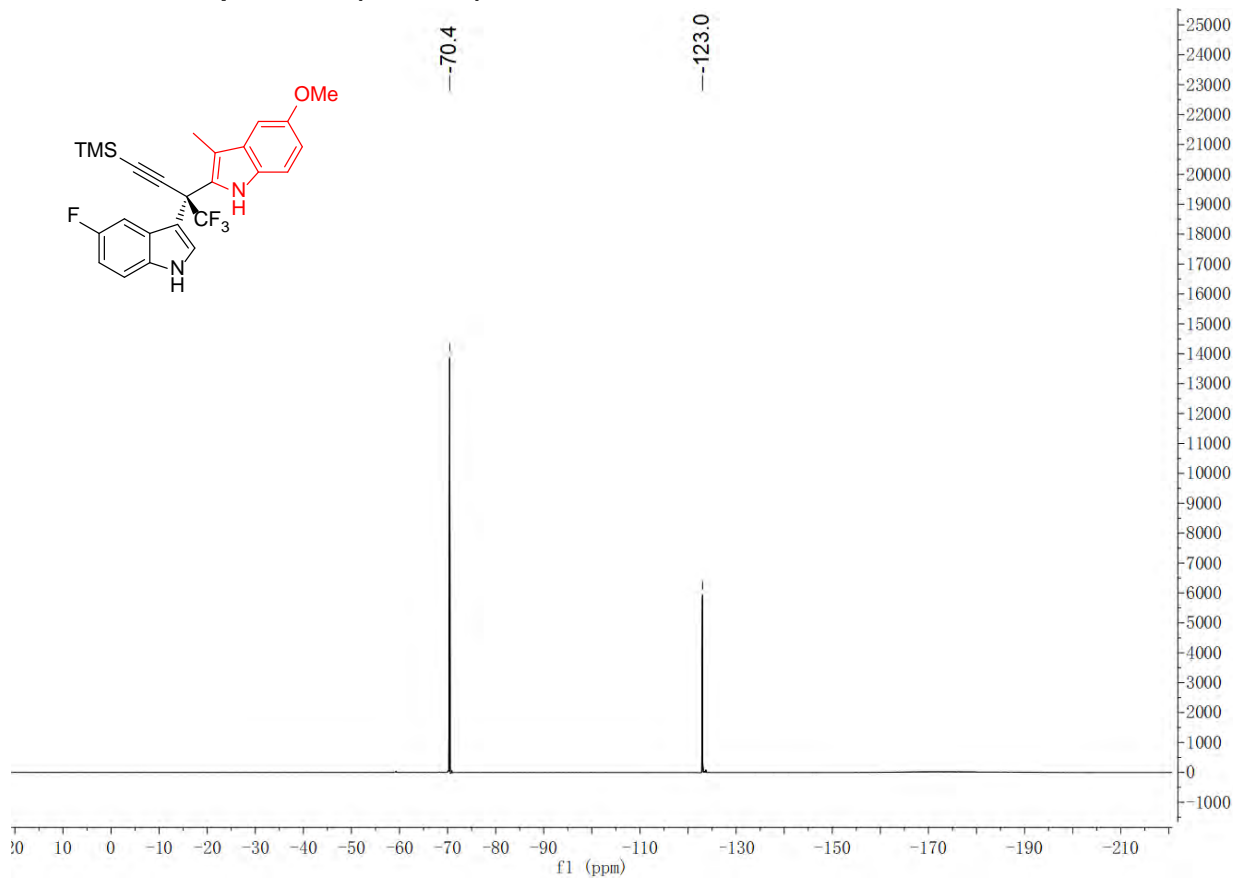

### <sup>1</sup>H NMR of compound 3v (in CDCl<sub>3</sub>)

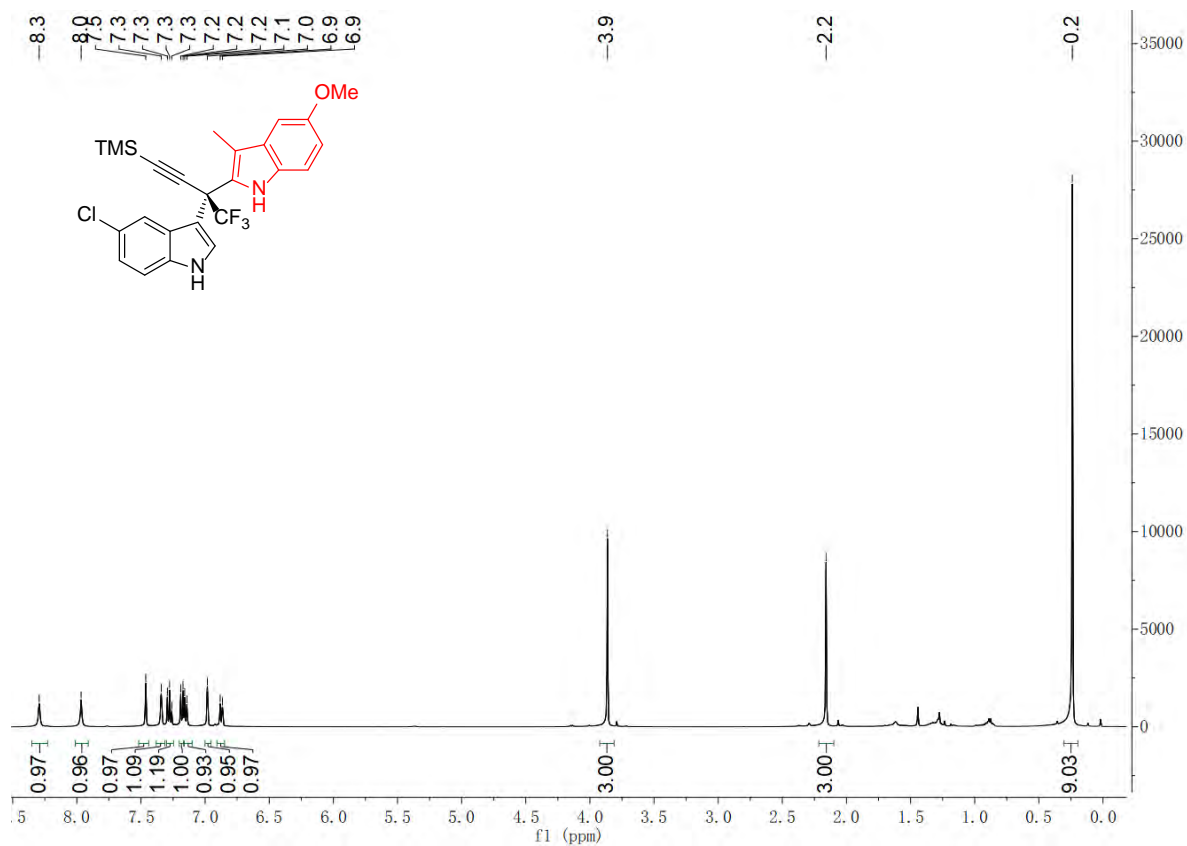

### <sup>13</sup>C NMR of compound 3v (in CDCl<sub>3</sub>)

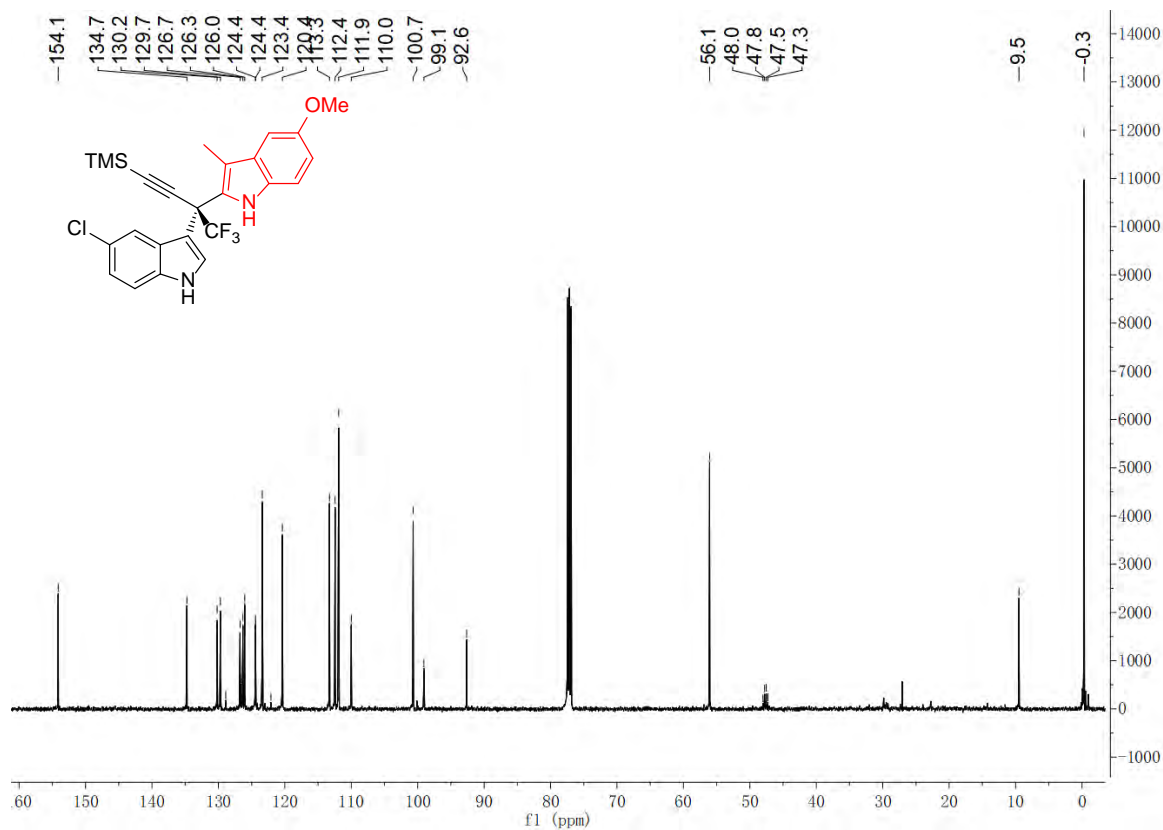

### <sup>19</sup>F NMR of compound 3v (in CDCl<sub>3</sub>)

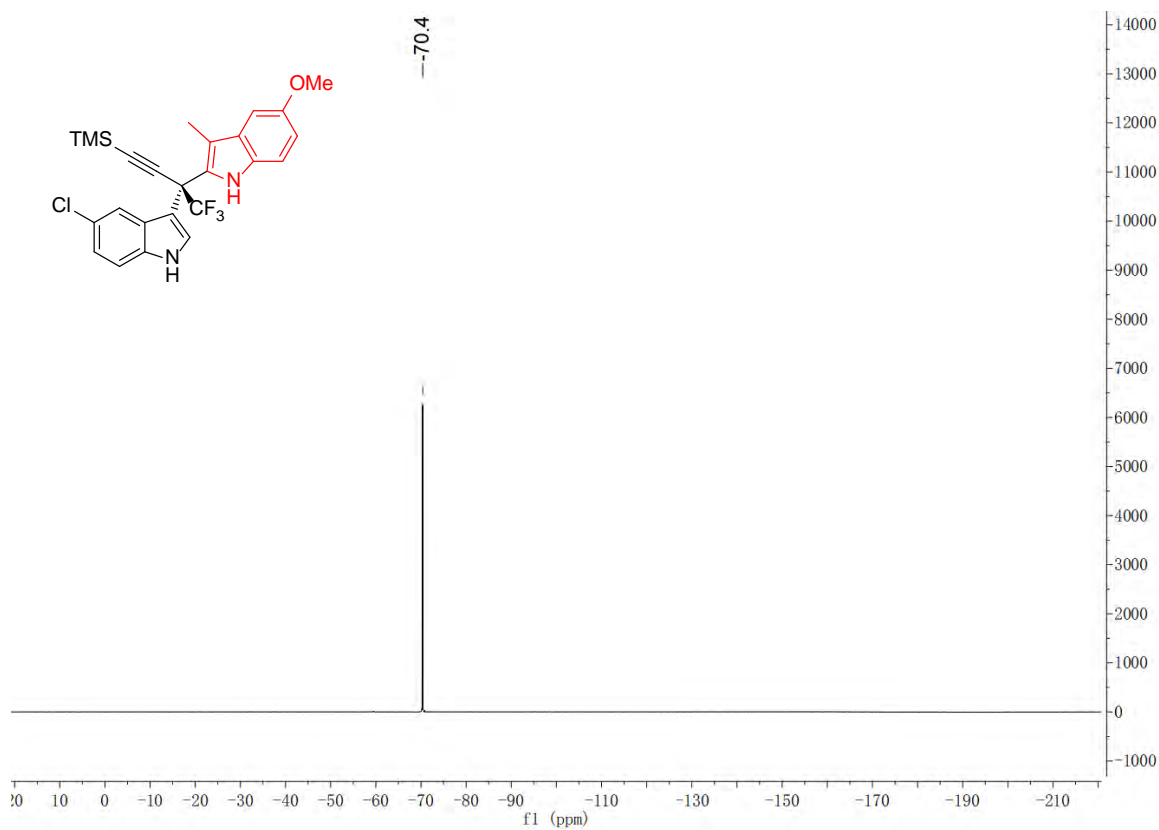

### <sup>1</sup>H NMR of compound 3w (in CDCl<sub>3</sub>)

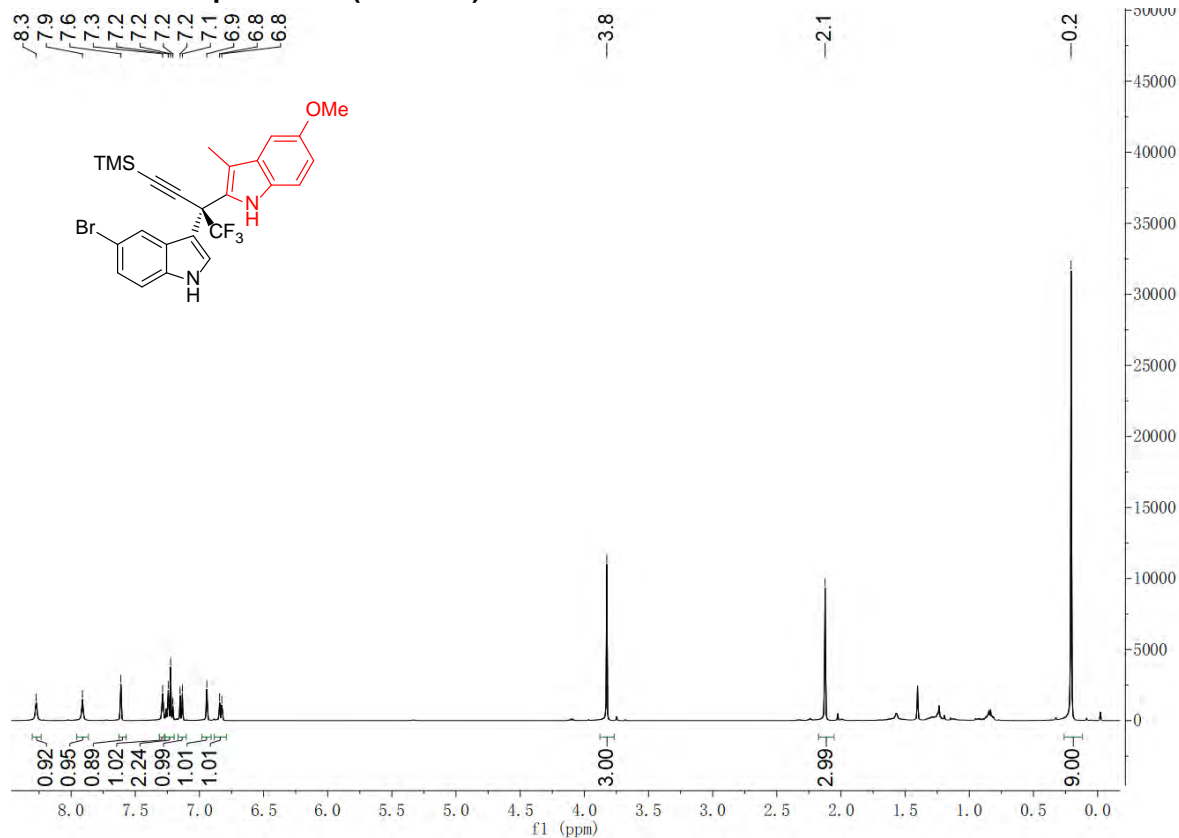

### <sup>13</sup>C NMR of compound 3w (in CDCl<sub>3</sub>)

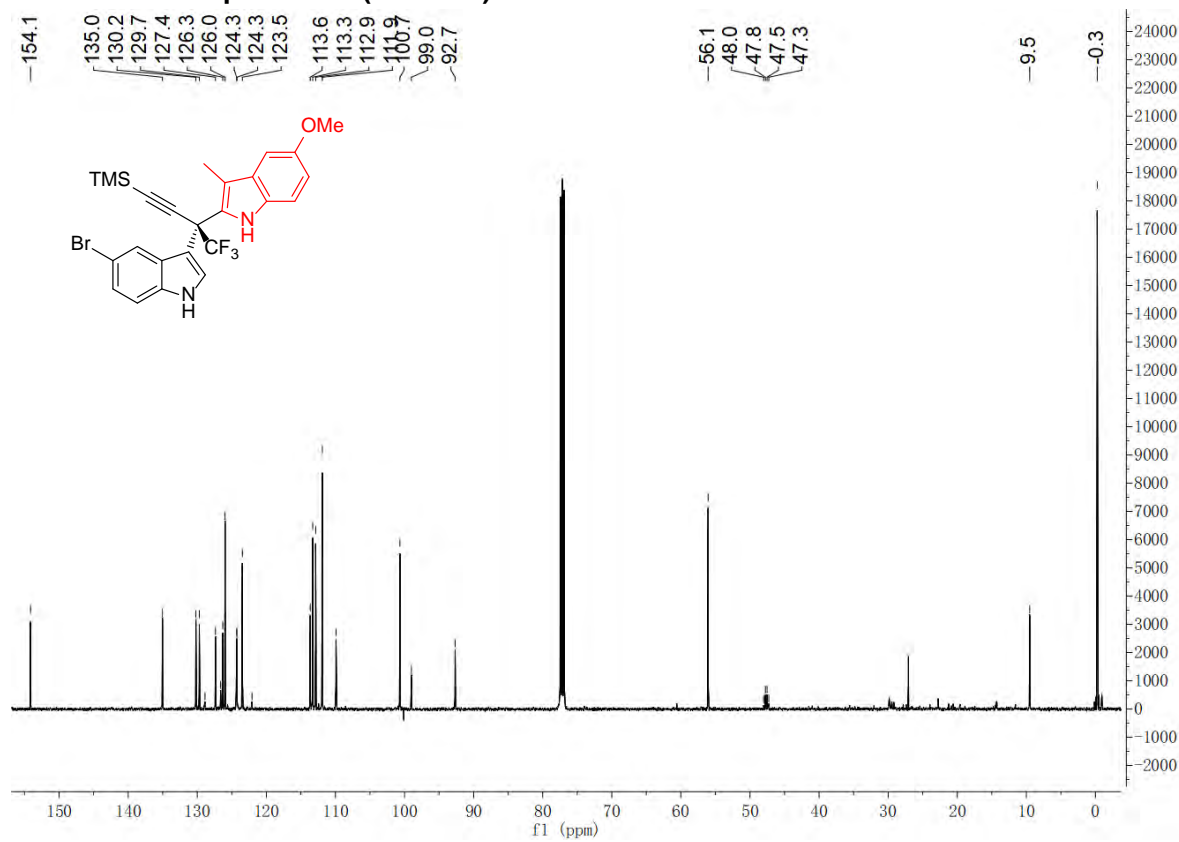

### $^{19}\text{F}$ NMR of compound 3w (in $\text{CDCl}_3$ )

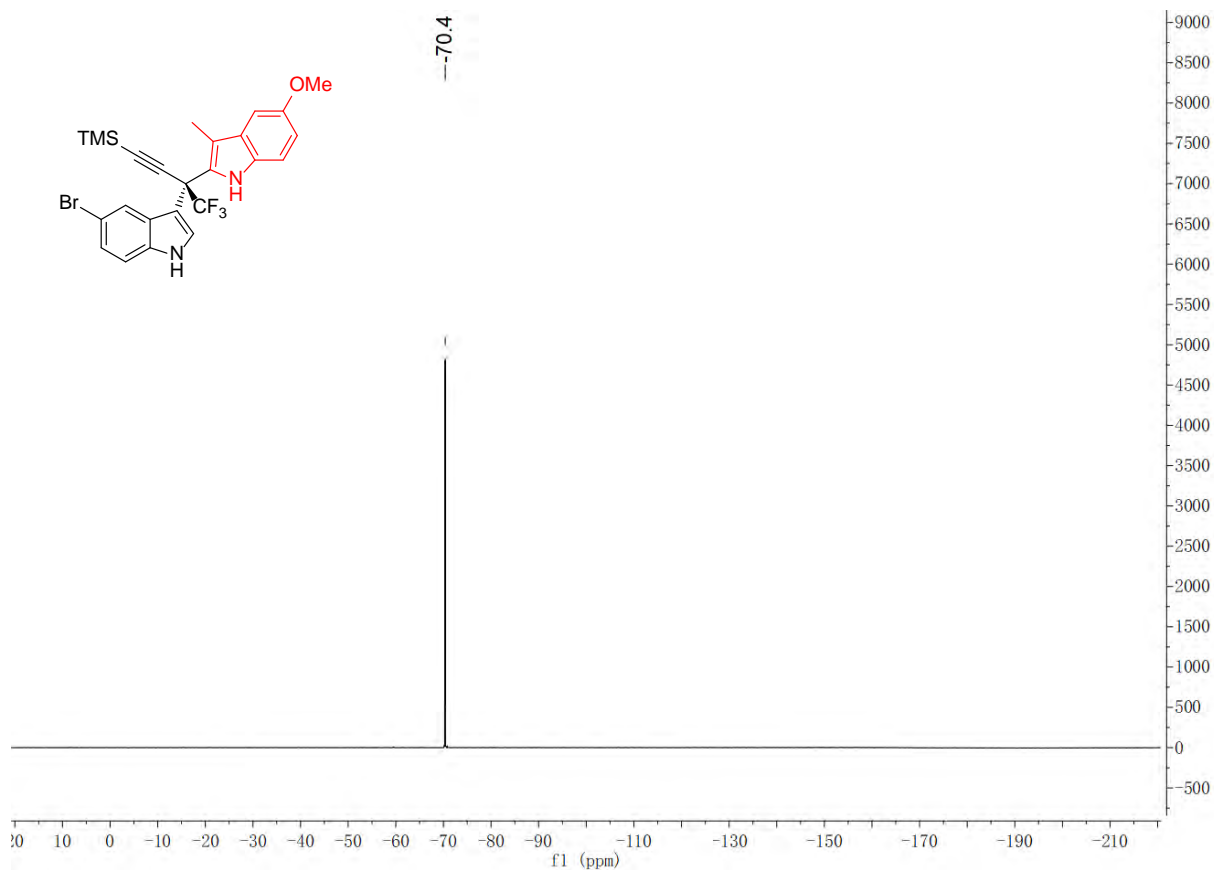

### $^1\text{H}$ NMR of compound 3x (in $\text{CDCl}_3$ )

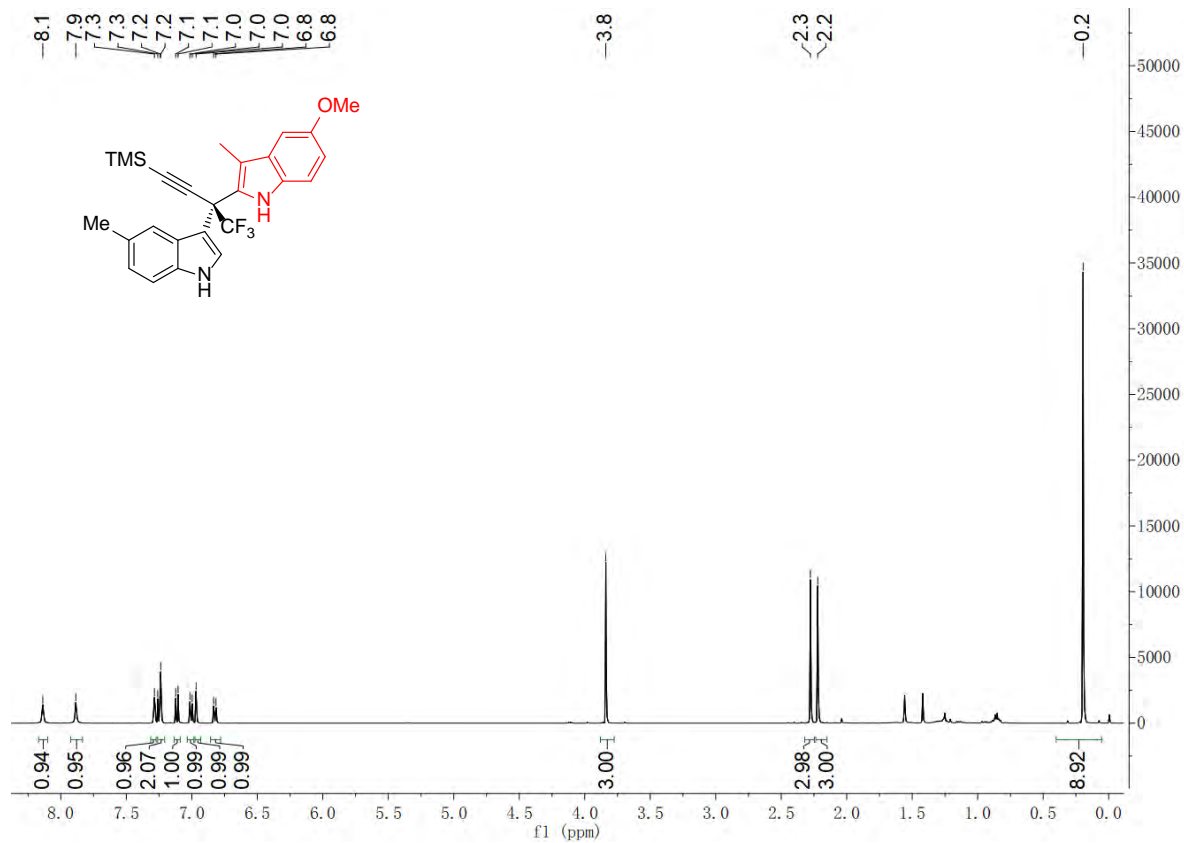

### <sup>13</sup>C NMR of compound 3x (in CDCl<sub>3</sub>)

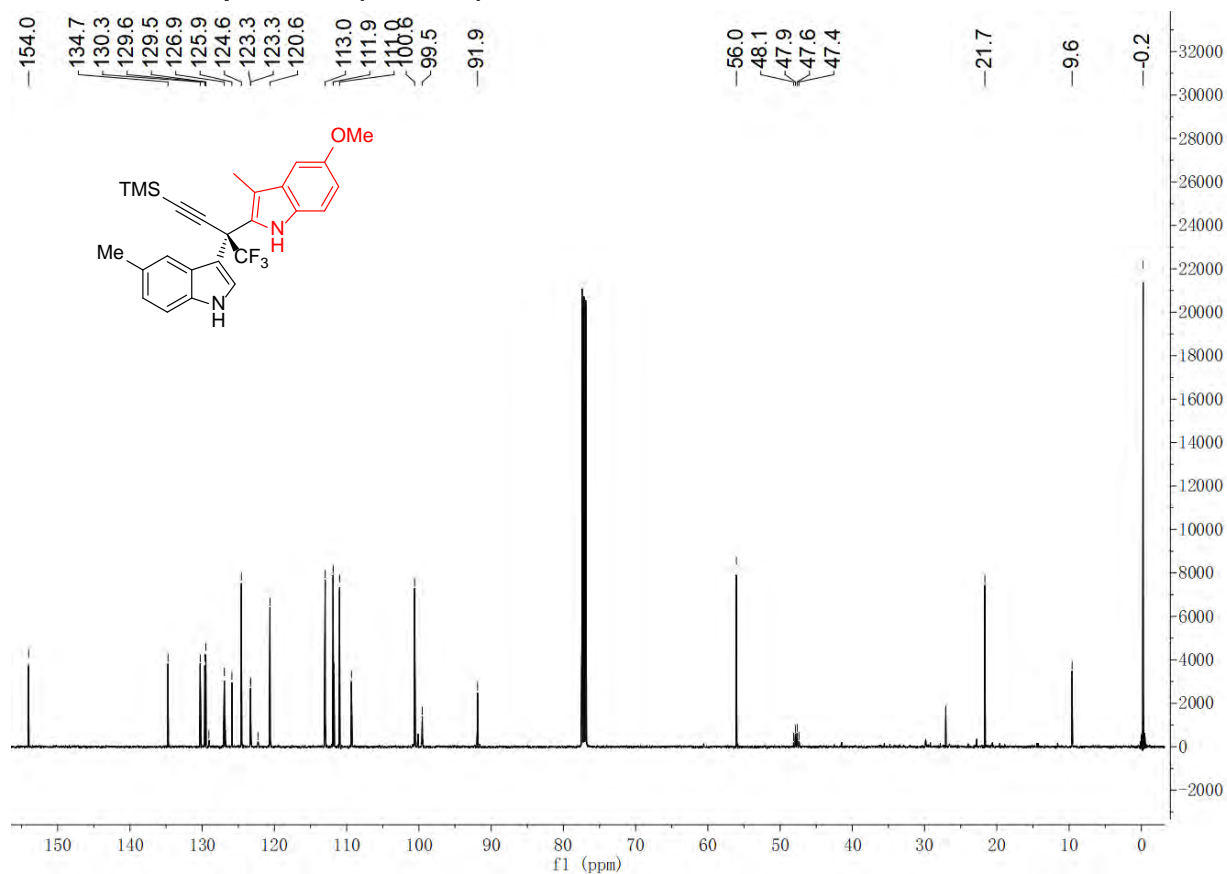

### <sup>19</sup>F NMR of compound 3x (in CDCl<sub>3</sub>)

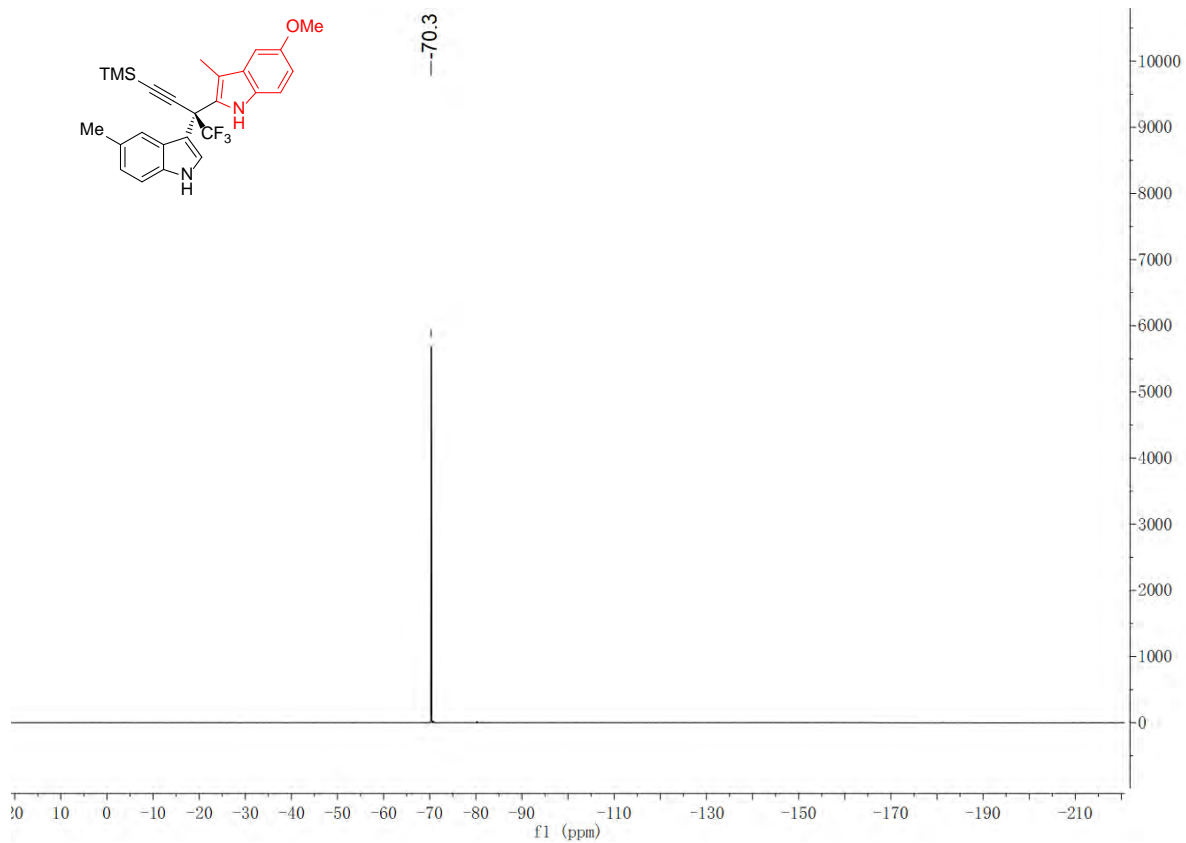

### <sup>1</sup>H NMR of compound 3y (in CDCl<sub>3</sub>)

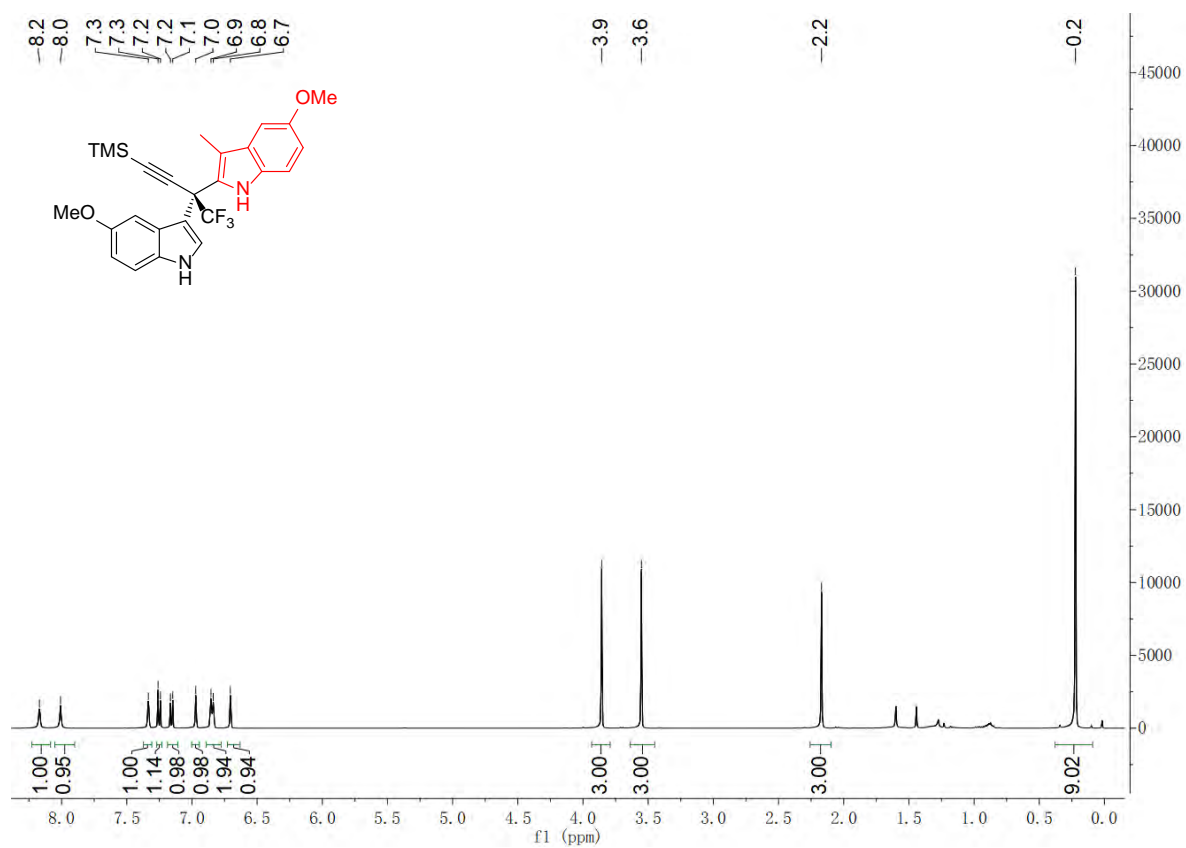

### <sup>13</sup>C NMR of compound 3y (in CDCl<sub>3</sub>)

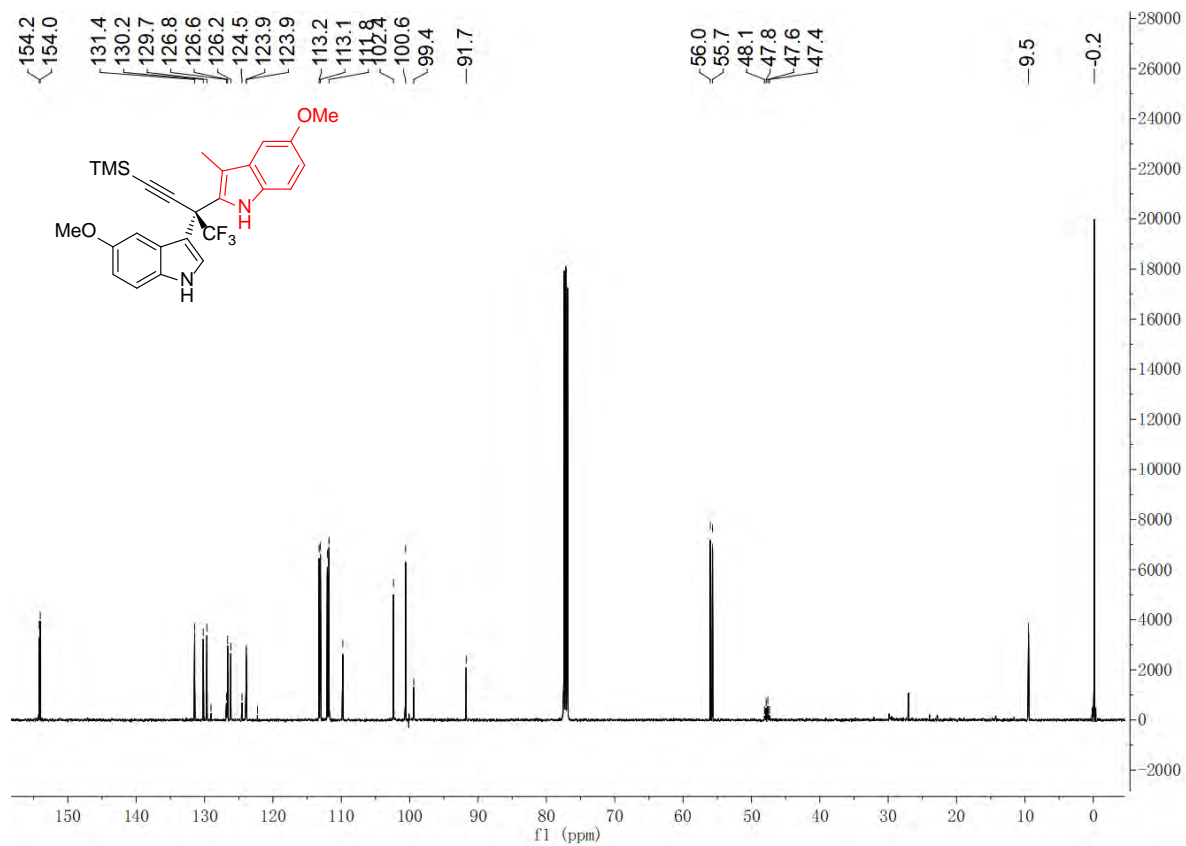

### <sup>19</sup>F NMR of compound 3y (in CDCl<sub>3</sub>)

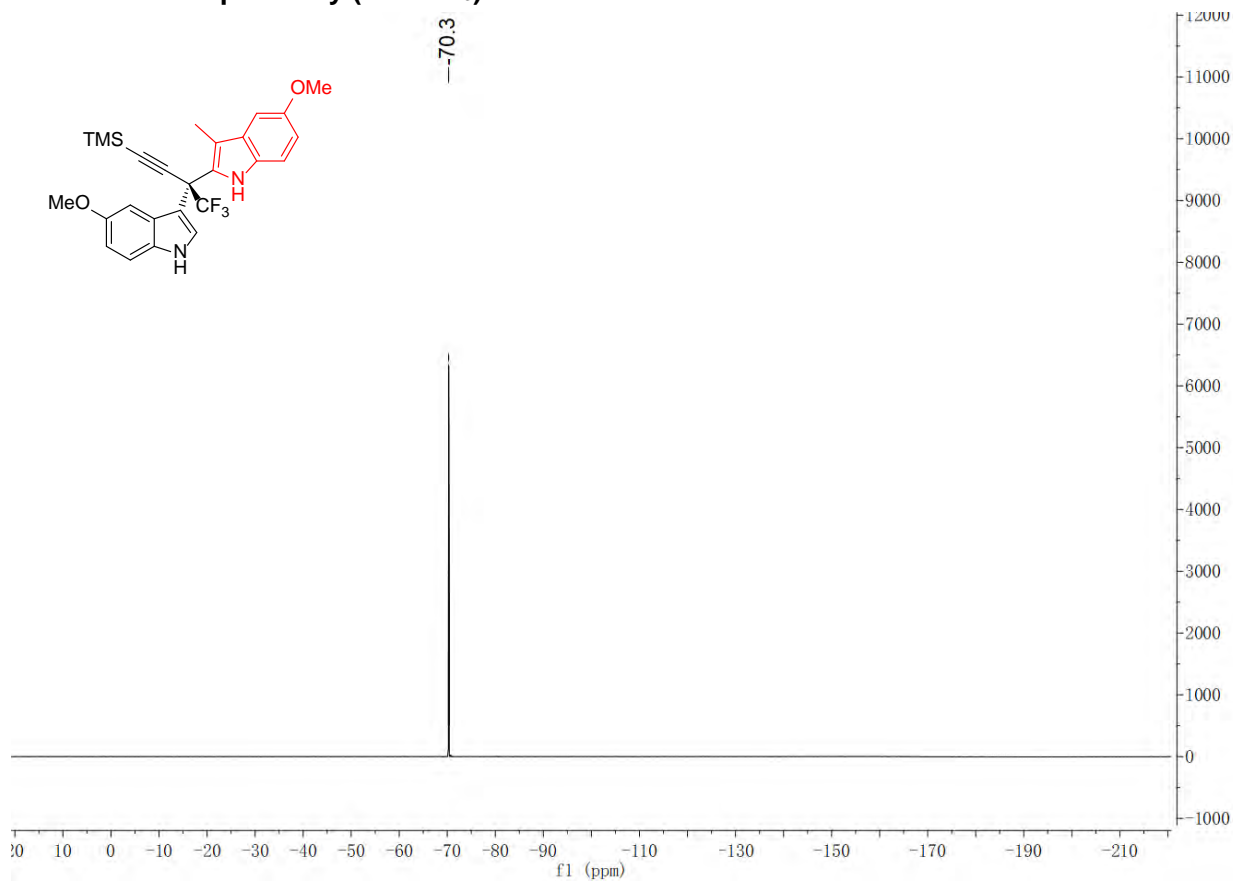

### <sup>1</sup>H NMR of compound 3z (in CDCl<sub>3</sub>)

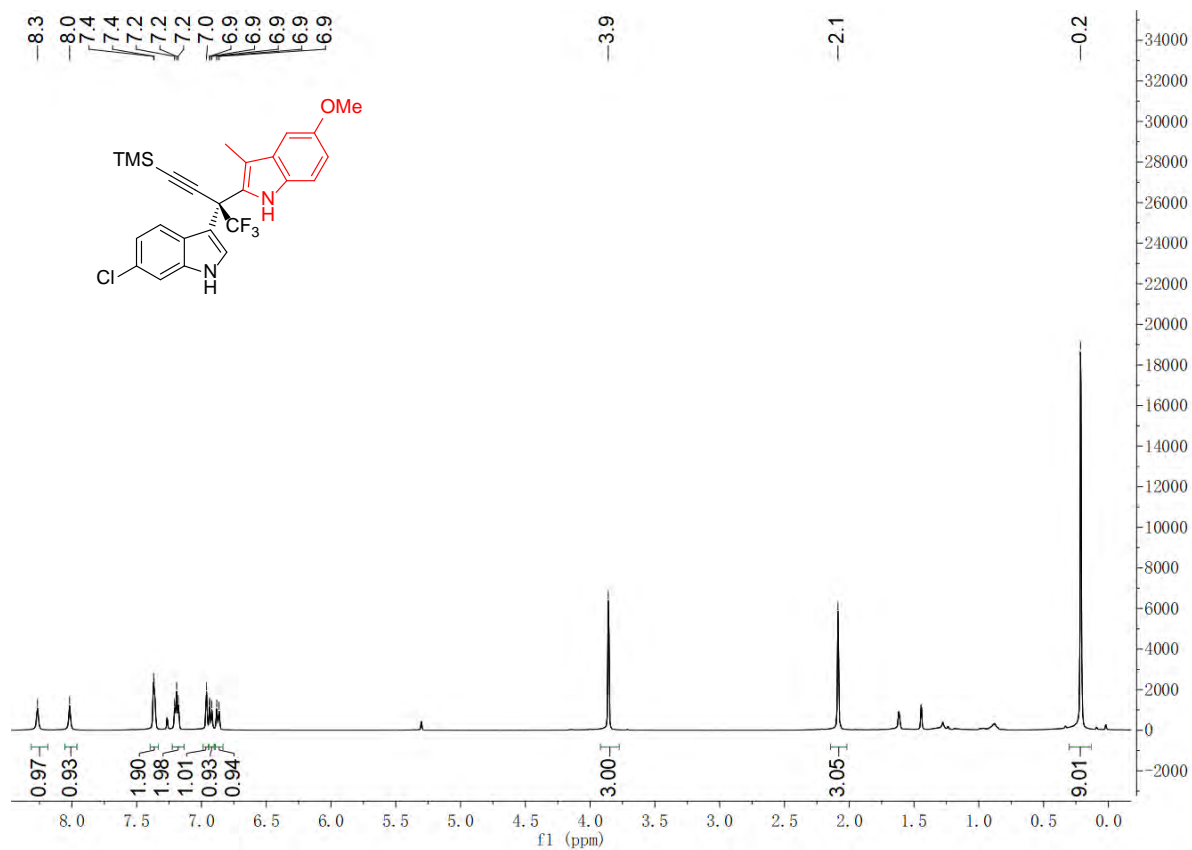

### <sup>13</sup>C NMR of compound 3z (in CDCl<sub>3</sub>)

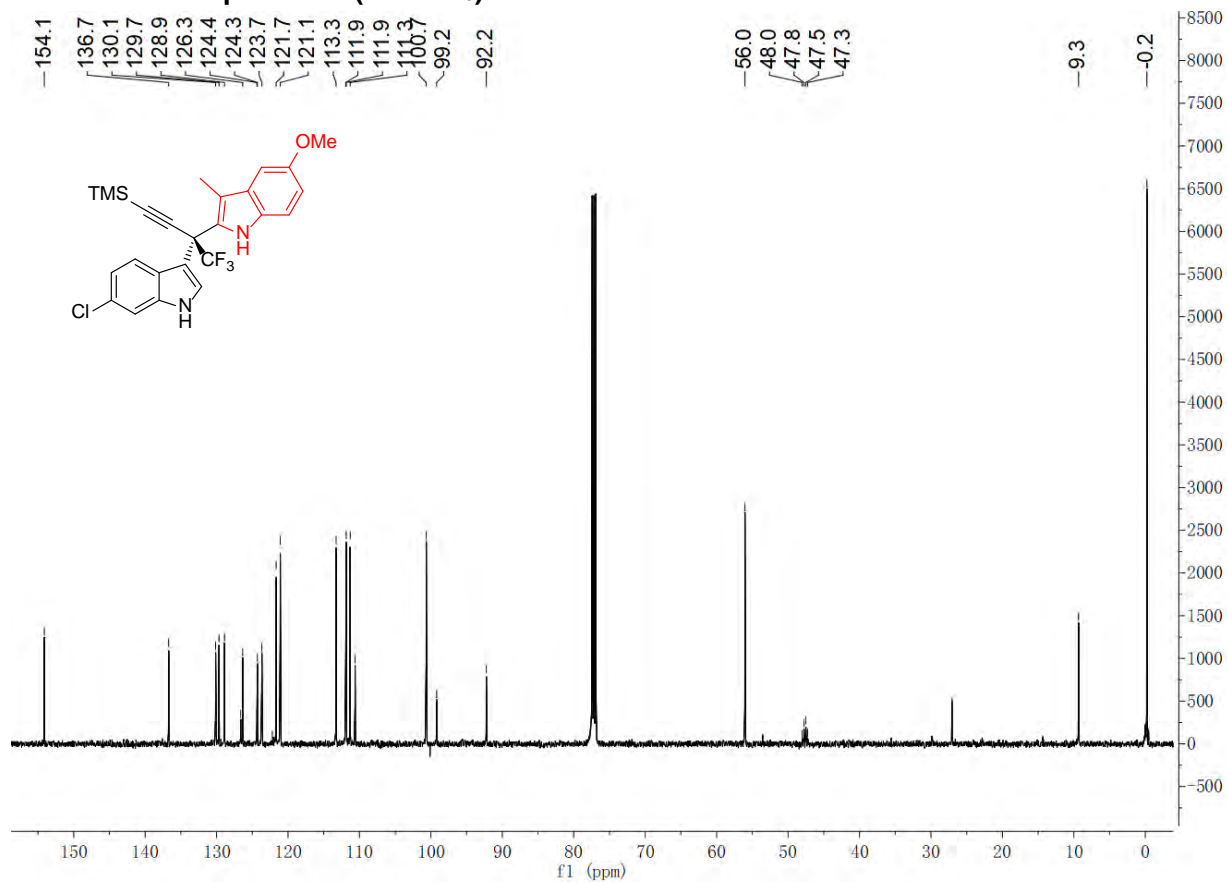

### <sup>19</sup>F NMR of compound 3z (in CDCl<sub>3</sub>)

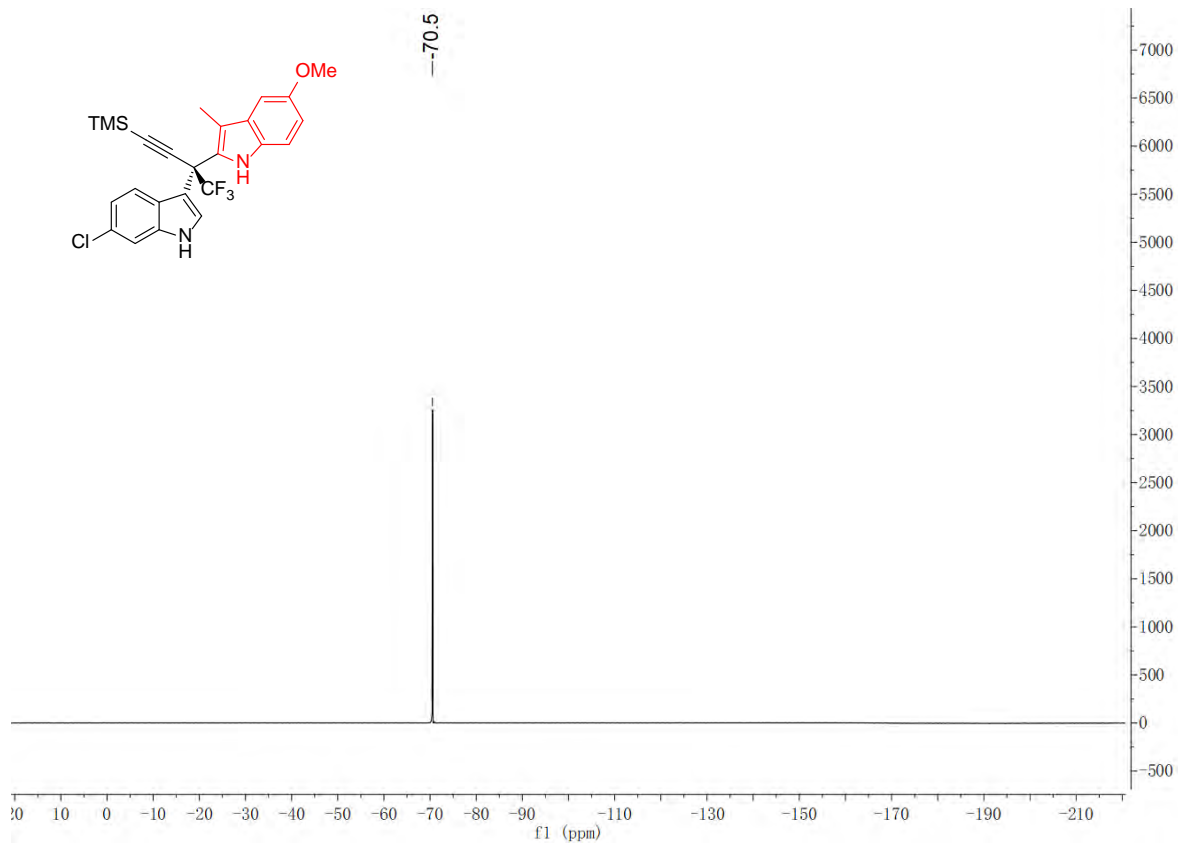



**<sup>1</sup>H NMR of compound 3aa (in CDCl<sub>3</sub>)**

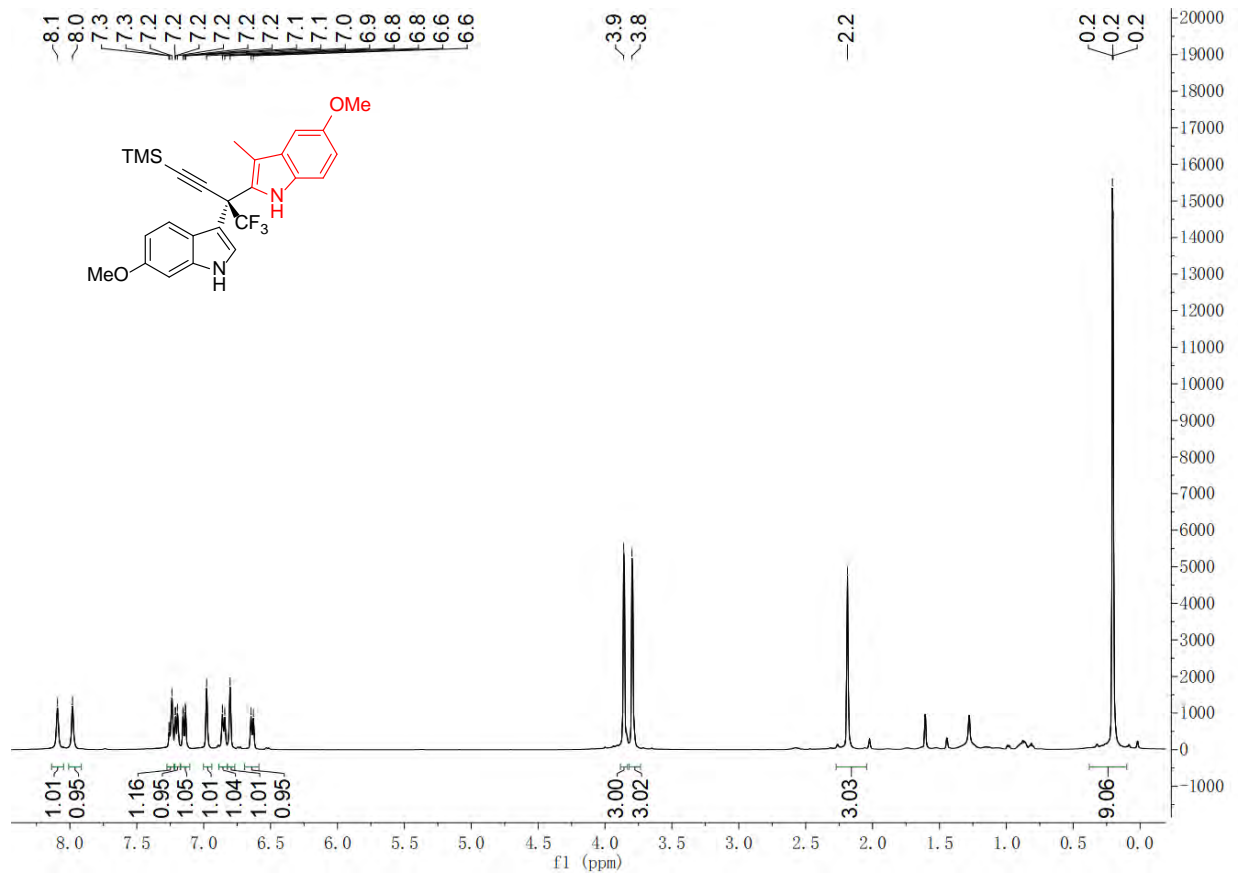

**<sup>13</sup>C NMR of compound 3aa (in CDCl<sub>3</sub>)**

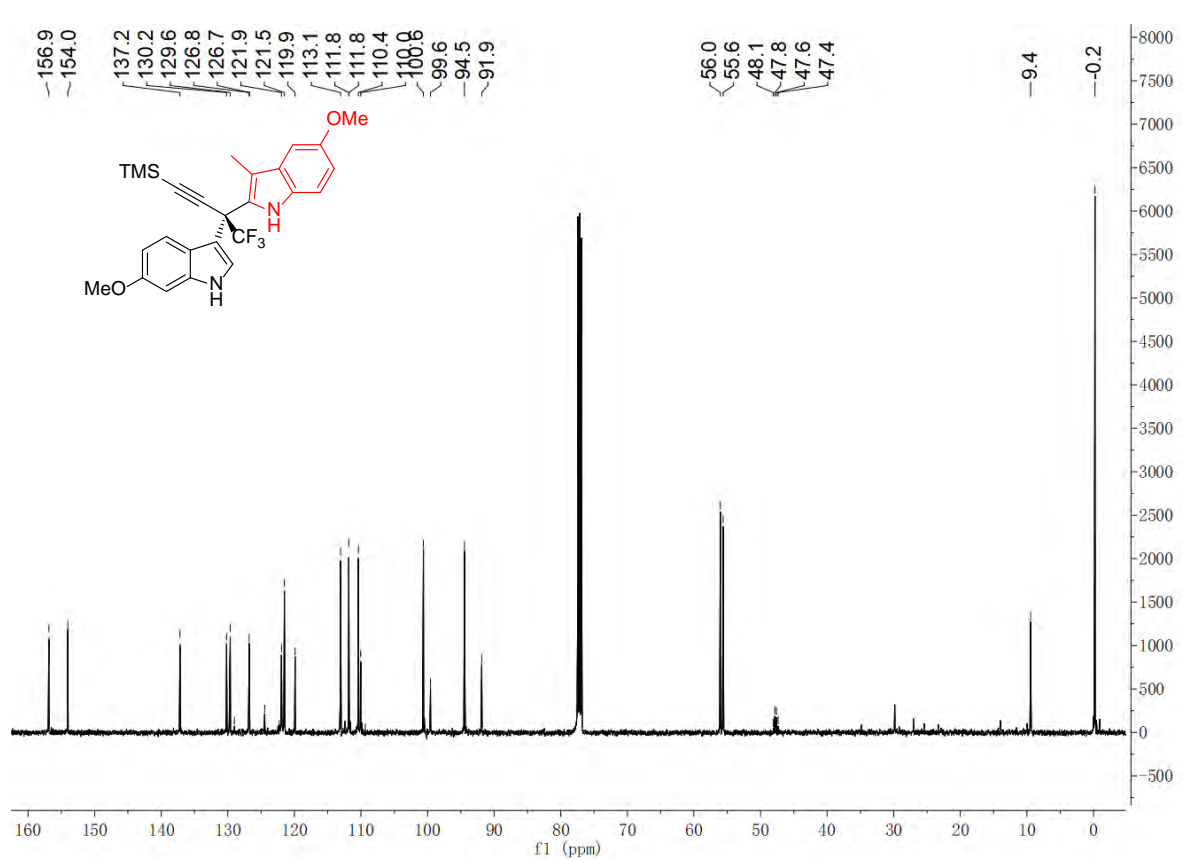

### <sup>19</sup>F NMR of compound 3aa (in CDCl<sub>3</sub>)

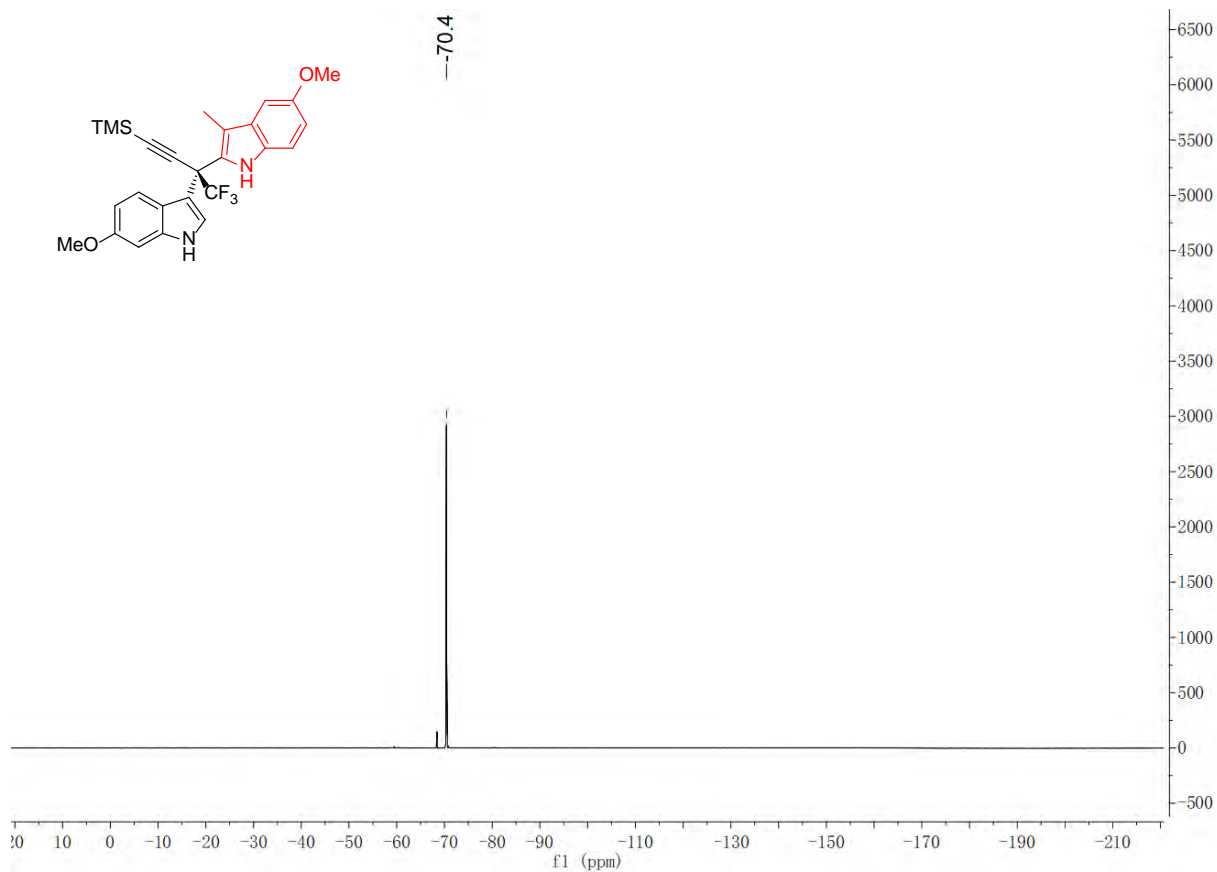

### <sup>1</sup>H NMR of compound 3ab (in CDCl<sub>3</sub>)

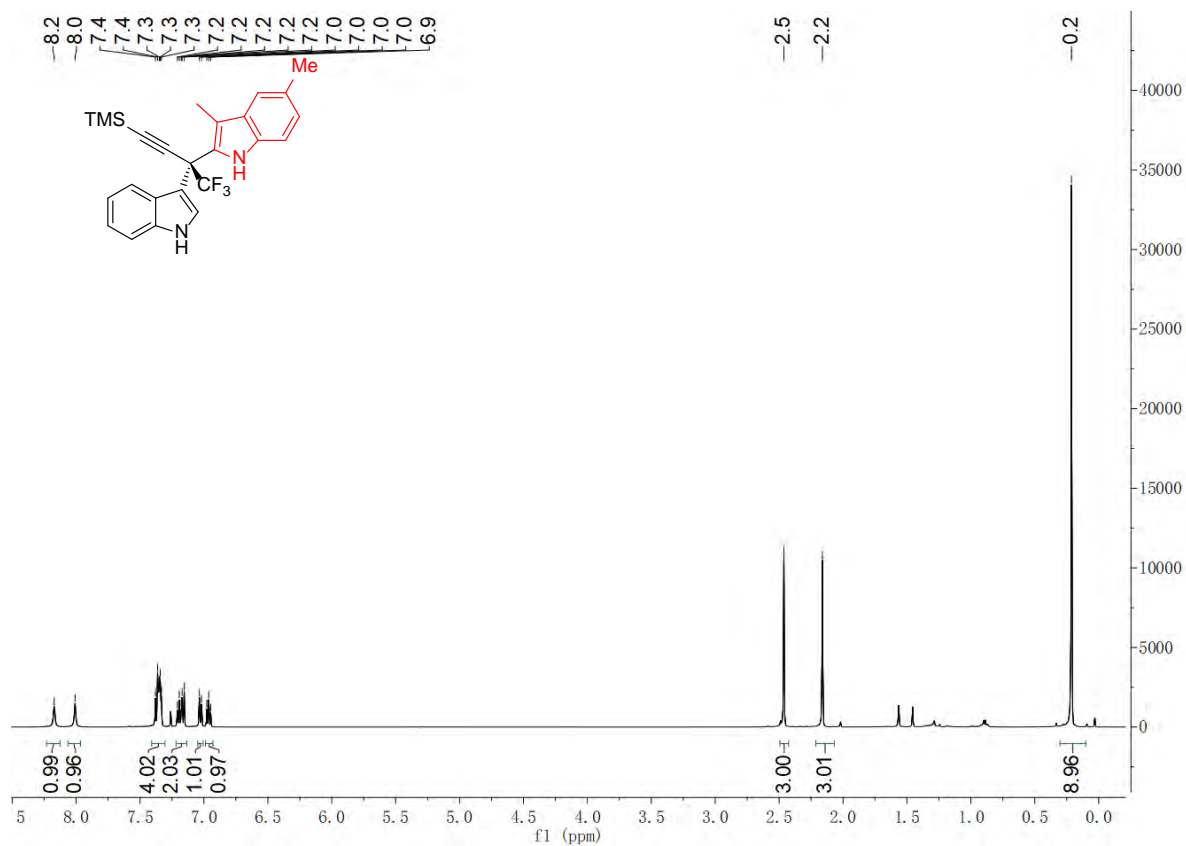

### <sup>13</sup>C NMR of compound 3ab (in CDCl<sub>3</sub>)

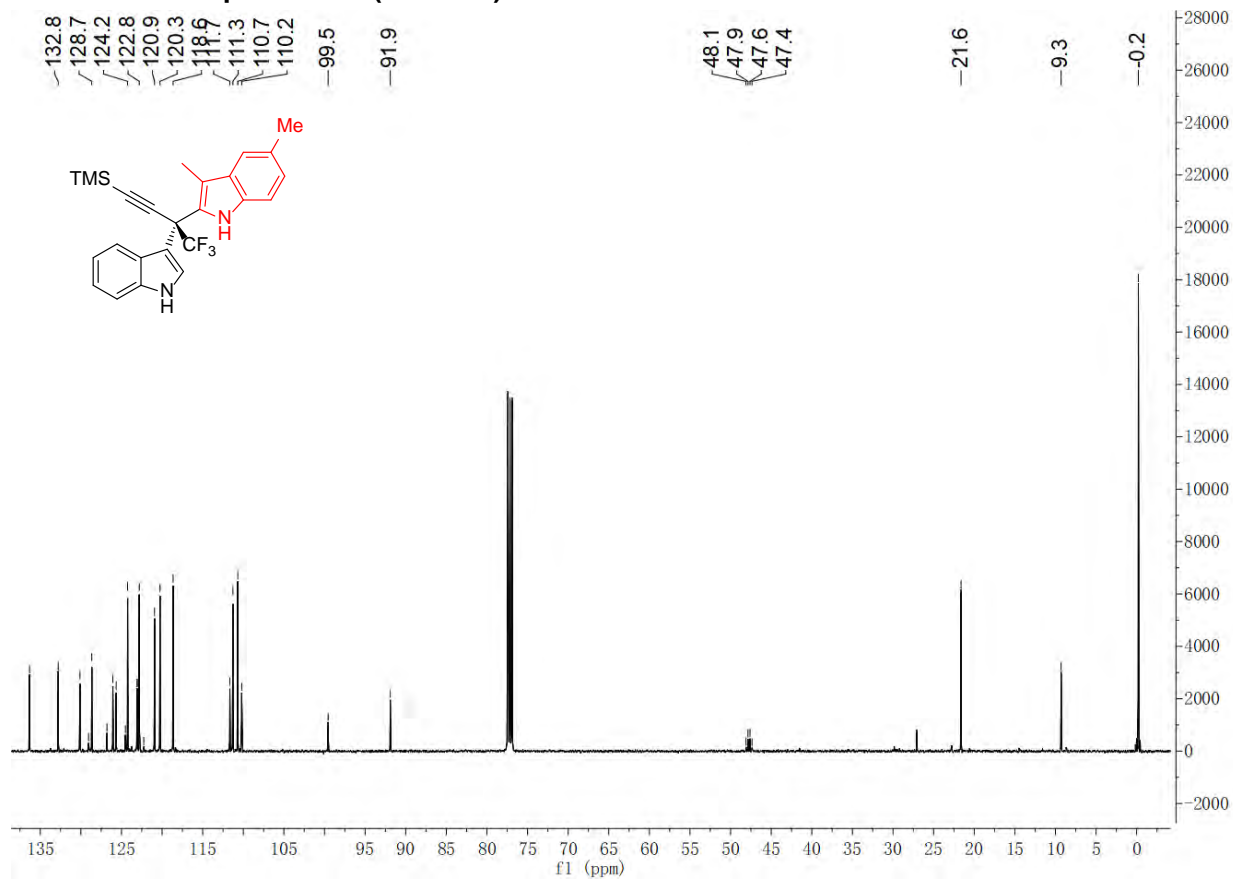

### <sup>19</sup>F NMR of compound 3ab (in CDCl<sub>3</sub>)

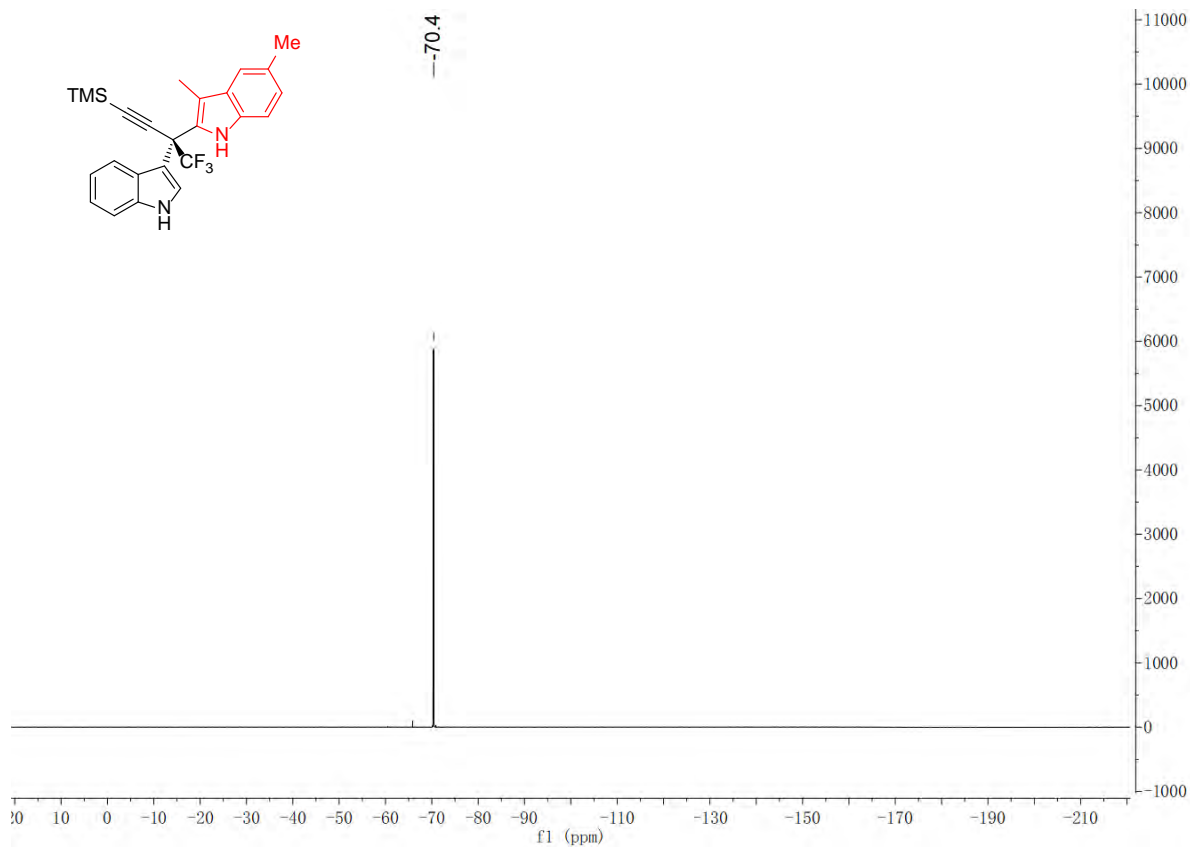

### <sup>1</sup>H NMR of compound 3ac (in CDCl<sub>3</sub>)

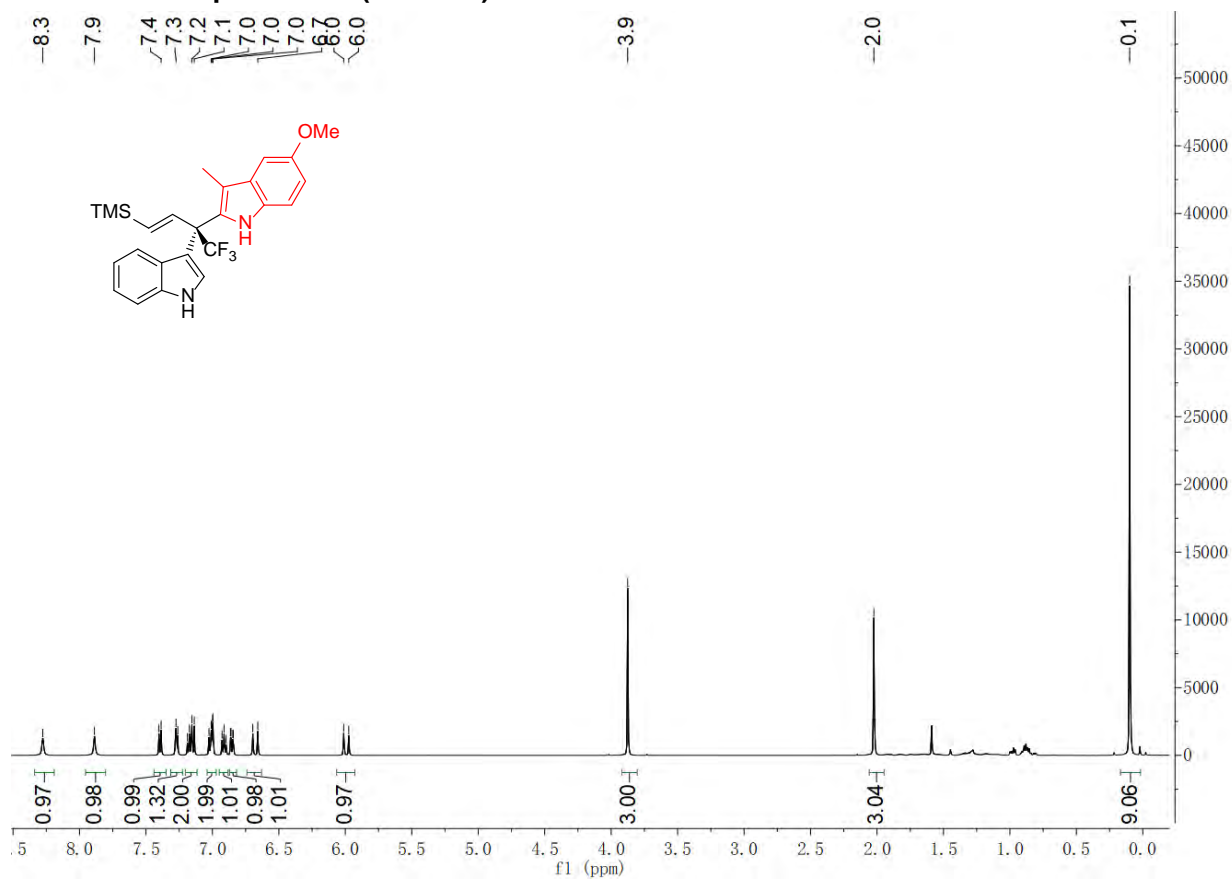

### <sup>13</sup>C NMR of compound 3ac (in CDCl<sub>3</sub>)

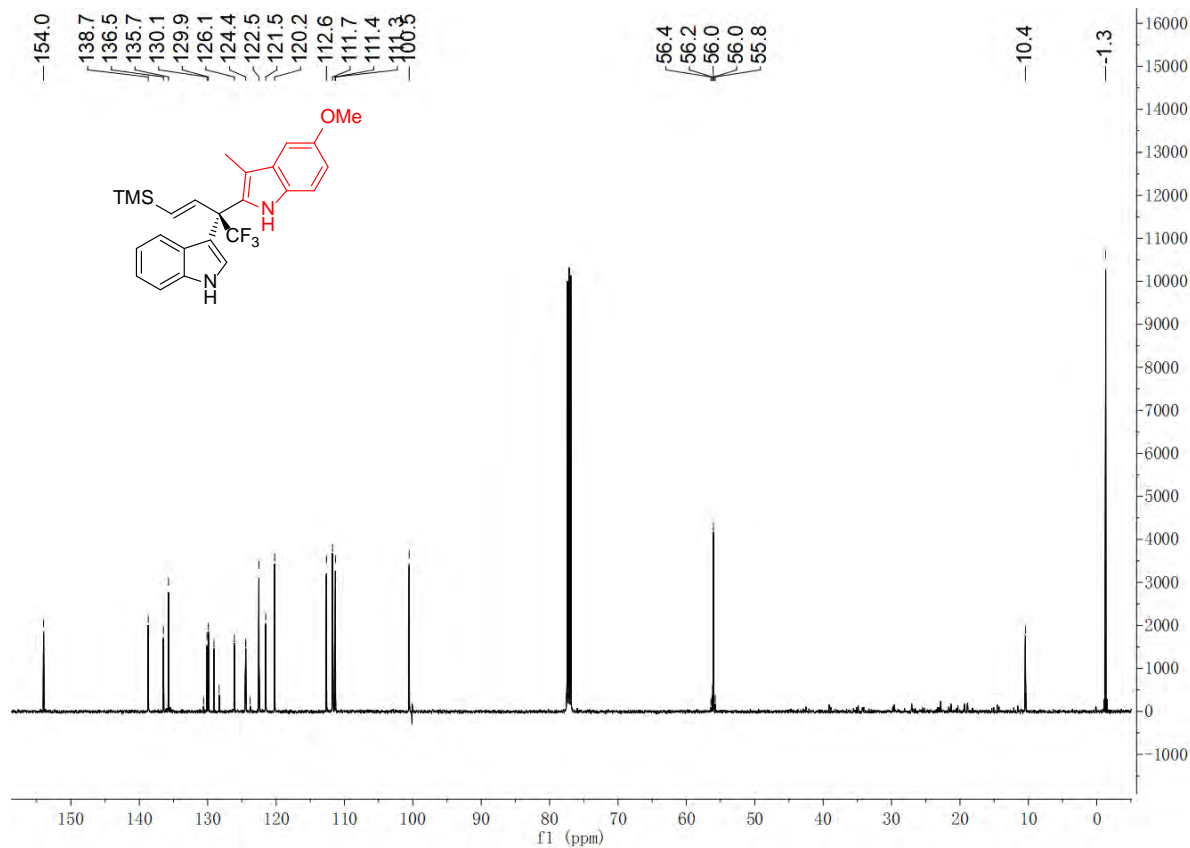

**<sup>19</sup>F NMR of compound 3ac (in CDCl<sub>3</sub>)**

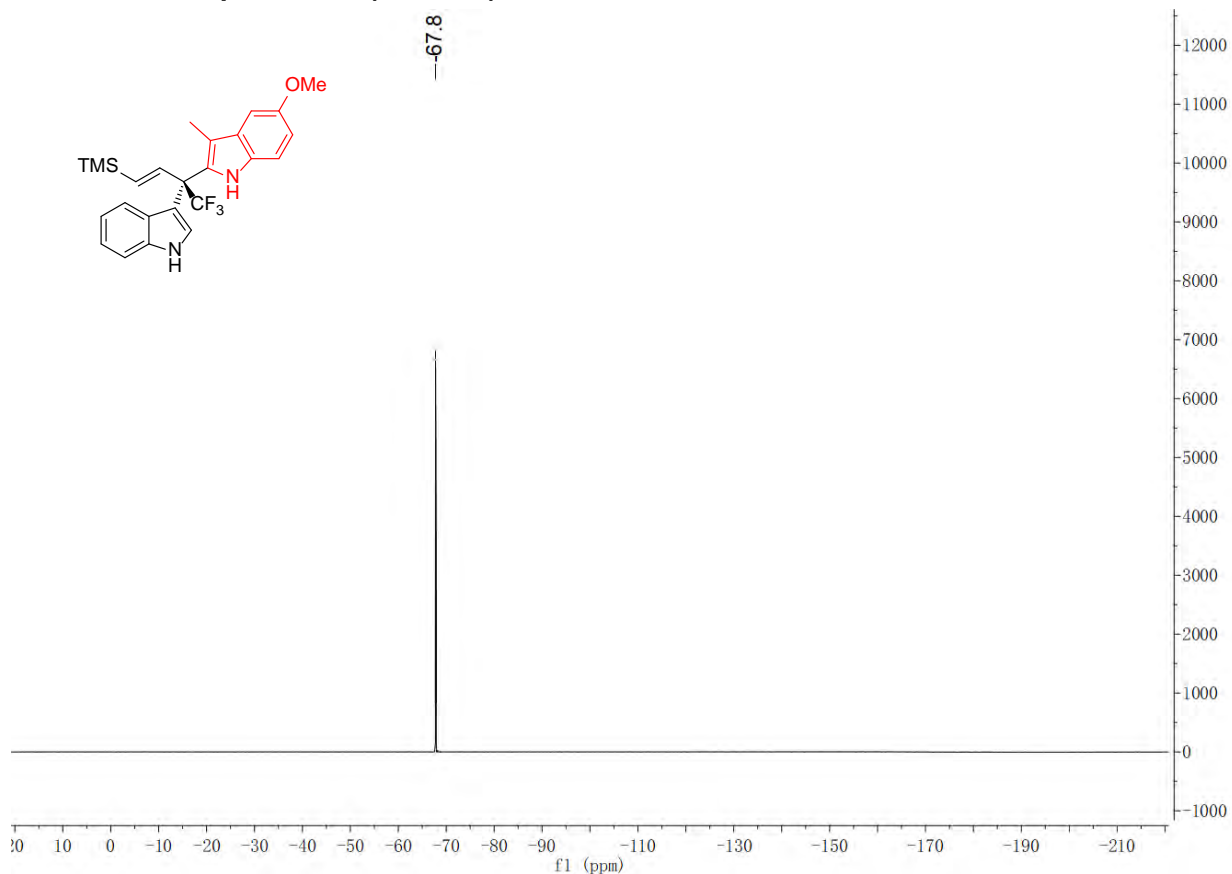

**<sup>1</sup>H NMR of compound 3ad (in CDCl<sub>3</sub>)**

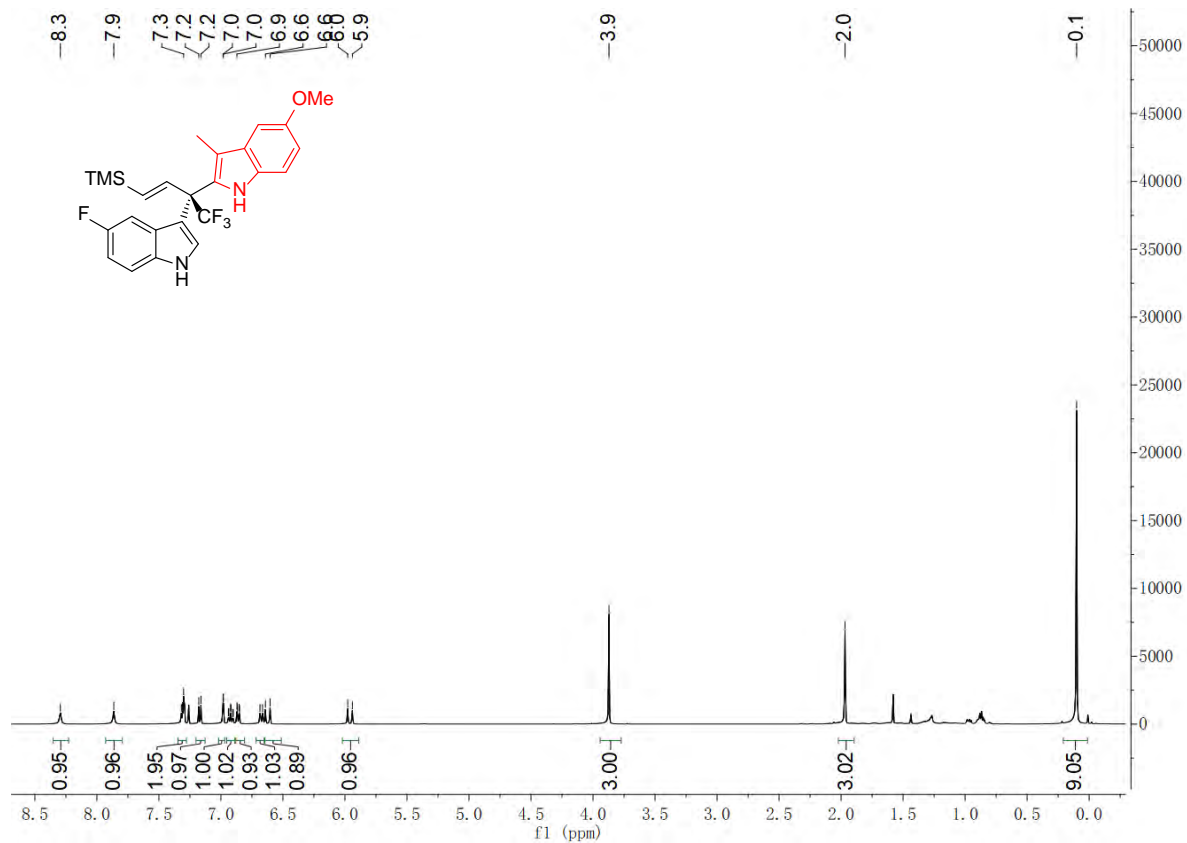

### <sup>13</sup>C NMR of compound 3ad (in CDCl<sub>3</sub>)

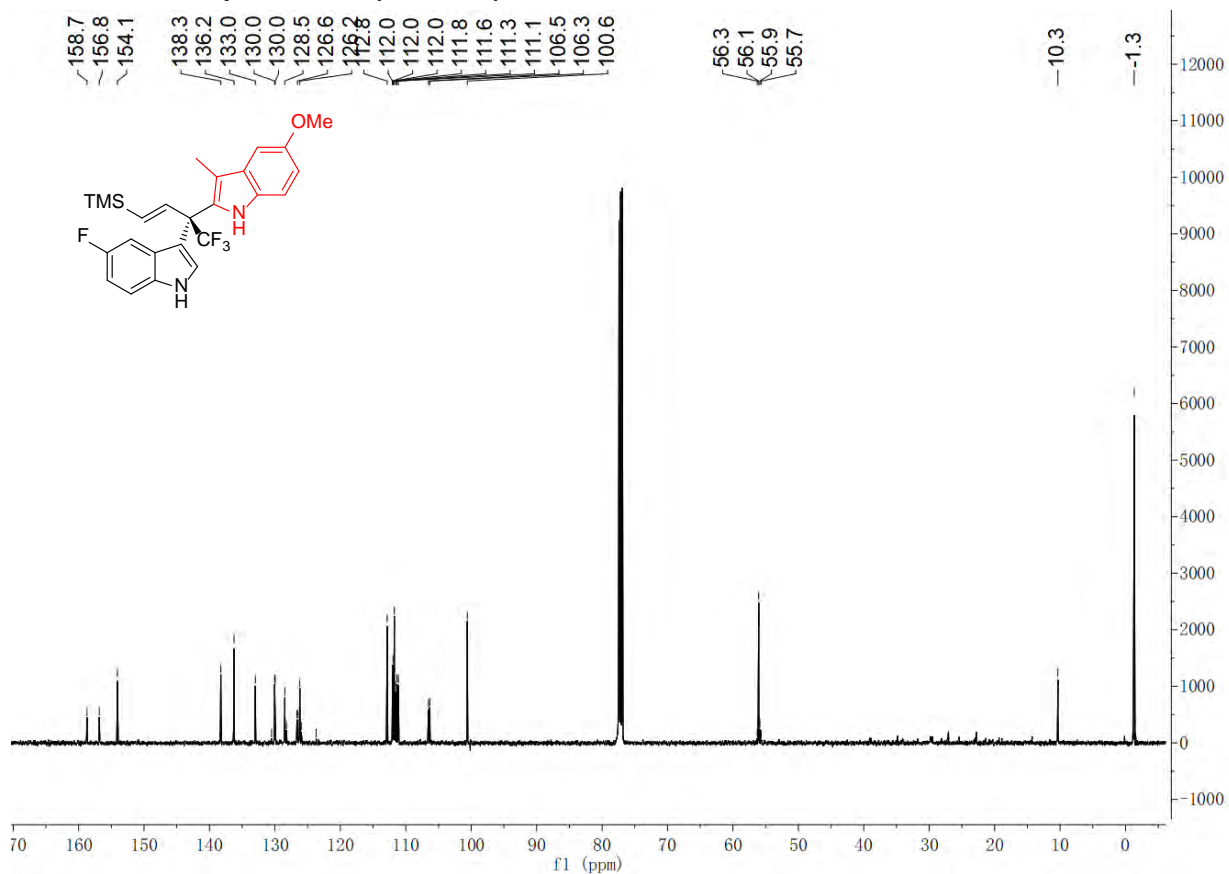

### <sup>19</sup>F NMR of compound 3ad (in CDCl<sub>3</sub>)

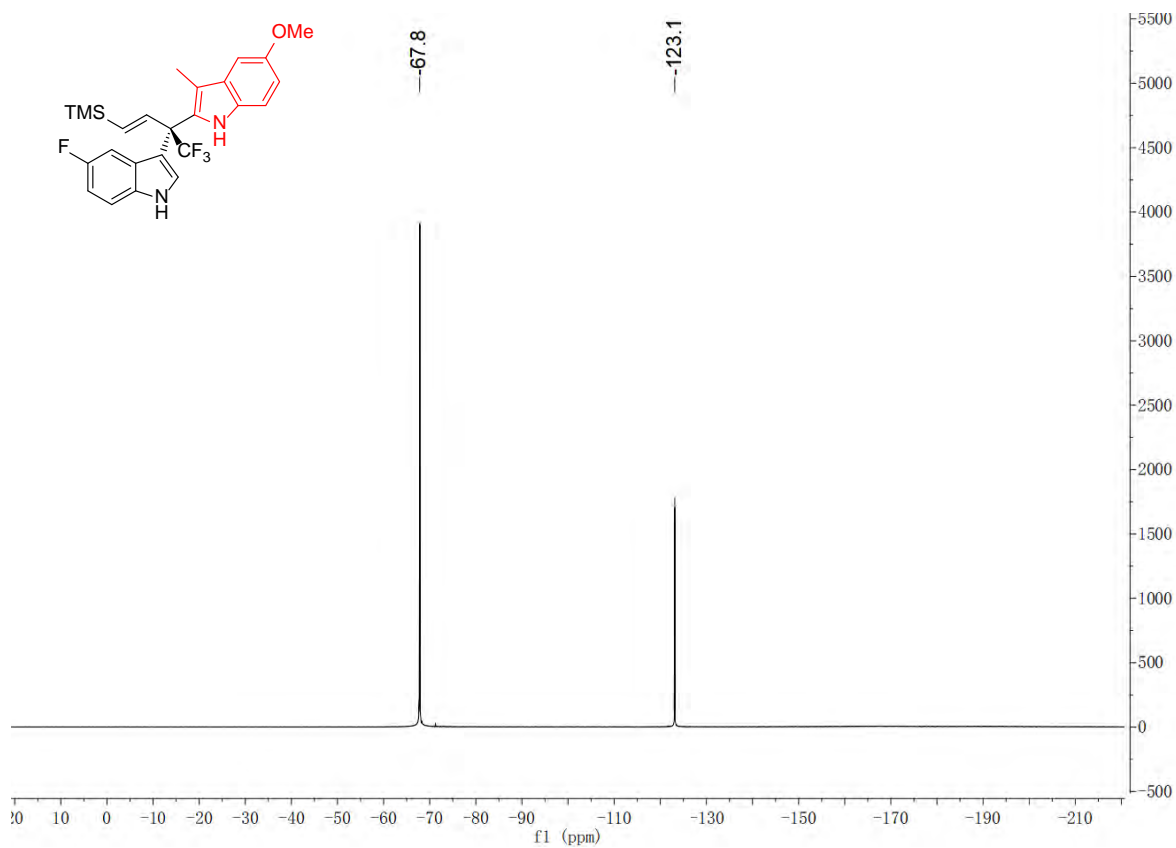

### <sup>1</sup>H NMR of compound 3ae (in CDCl<sub>3</sub>)

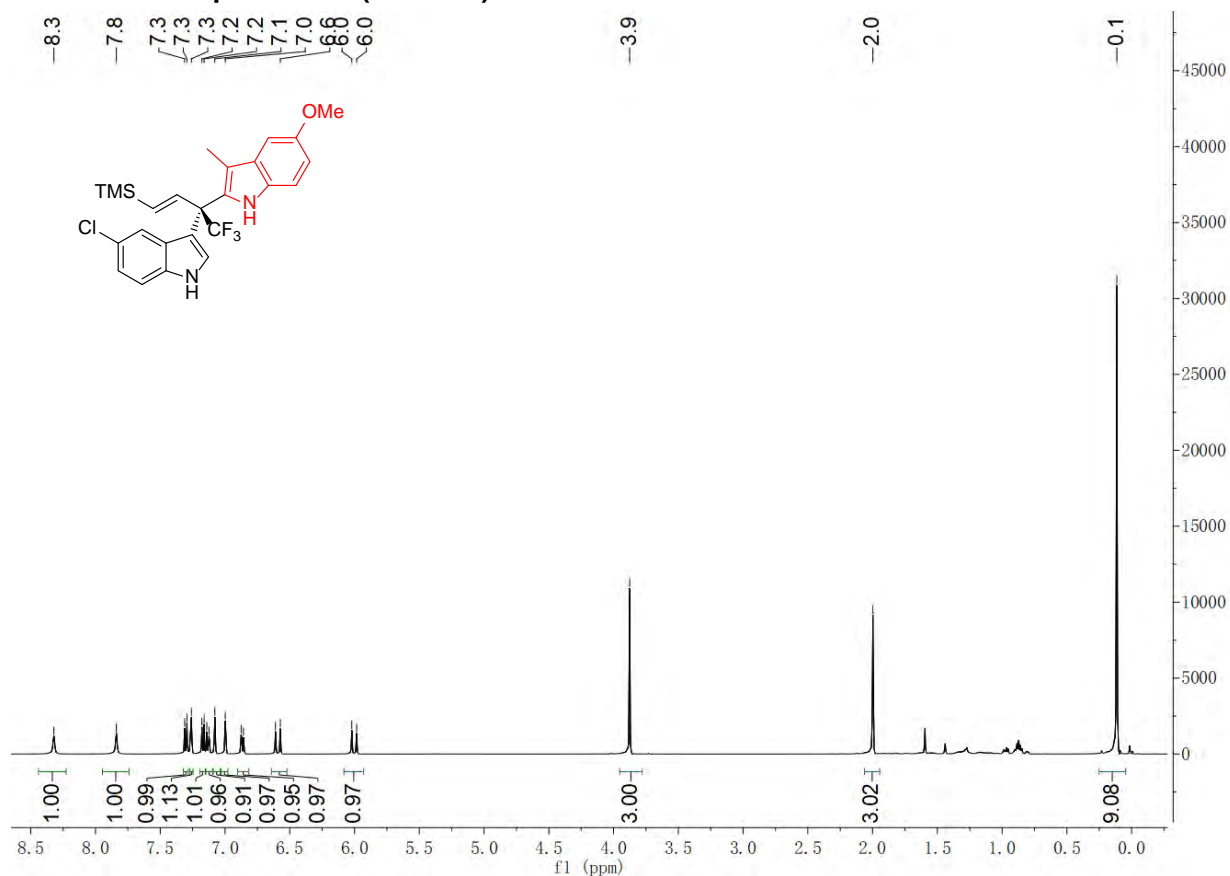

### <sup>13</sup>C NMR of compound 3ae (in CDCl<sub>3</sub>)

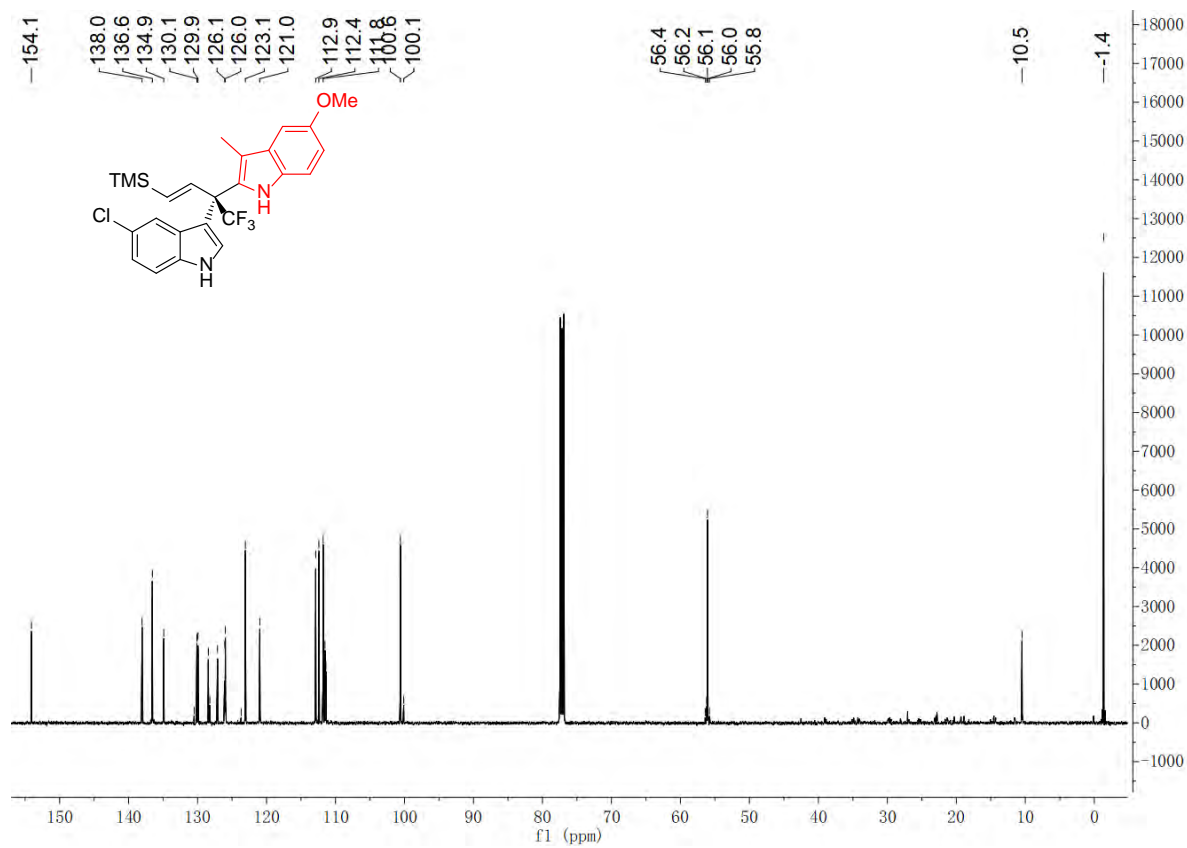

**<sup>19</sup>F NMR of compound 3ae (in CDCl<sub>3</sub>)**

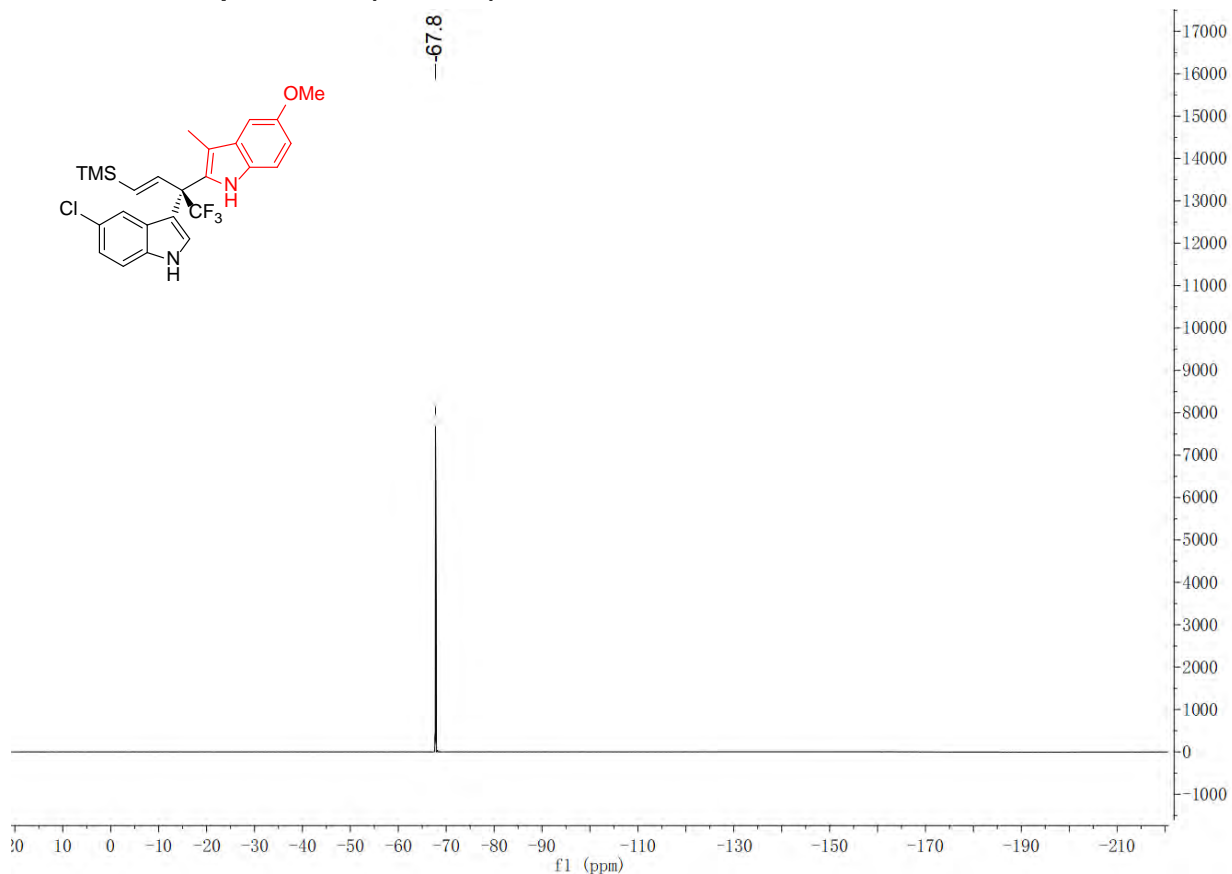

**<sup>1</sup>H NMR of compound 3af (in CDCl<sub>3</sub>)**

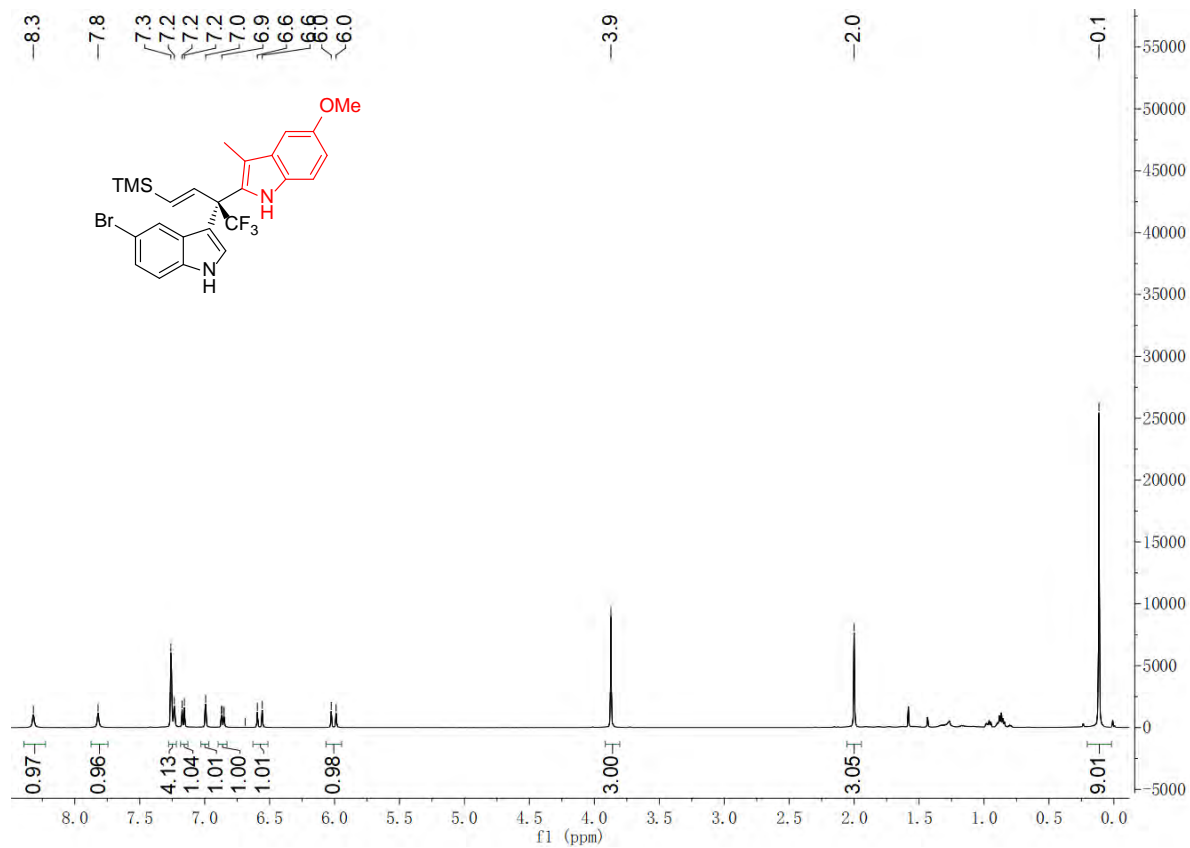



**<sup>13</sup>C NMR of compound 3af (in CDCl<sub>3</sub>)**

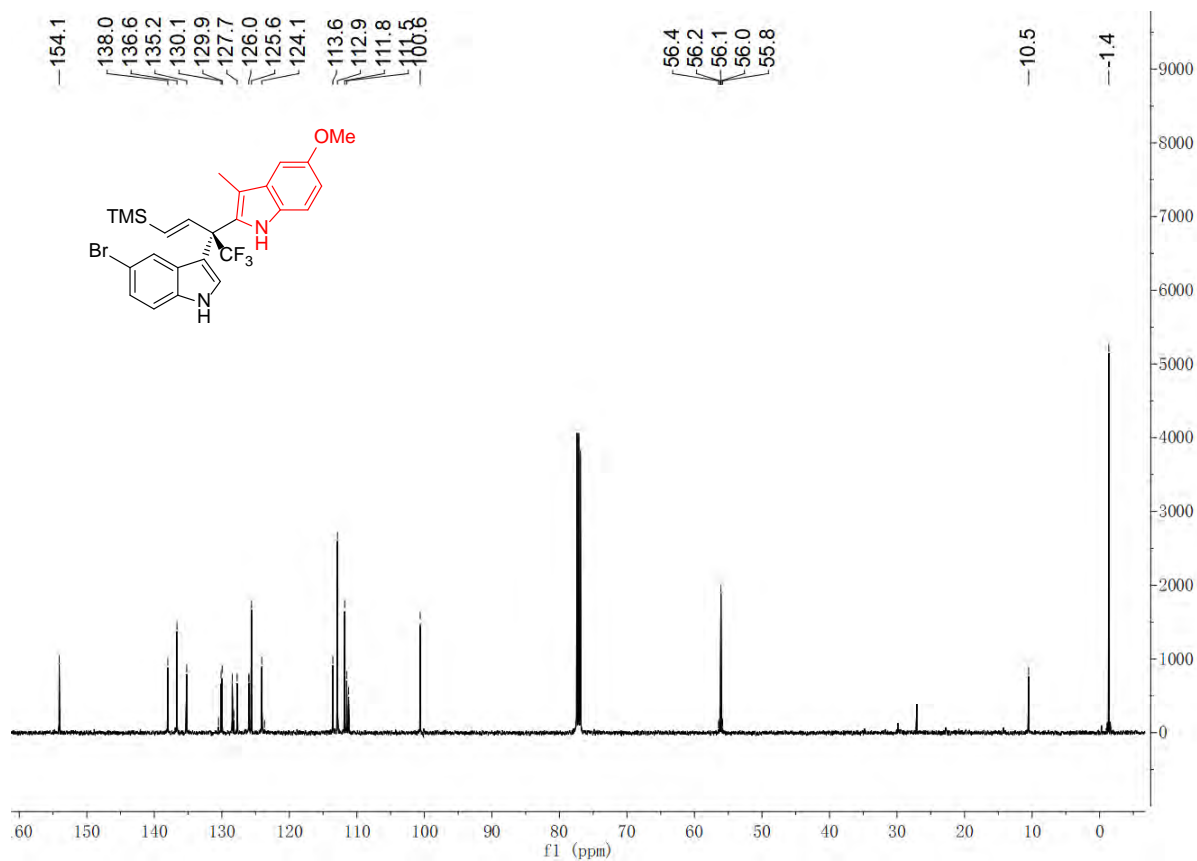

**<sup>19</sup>F NMR of compound 3af (in CDCl<sub>3</sub>)**

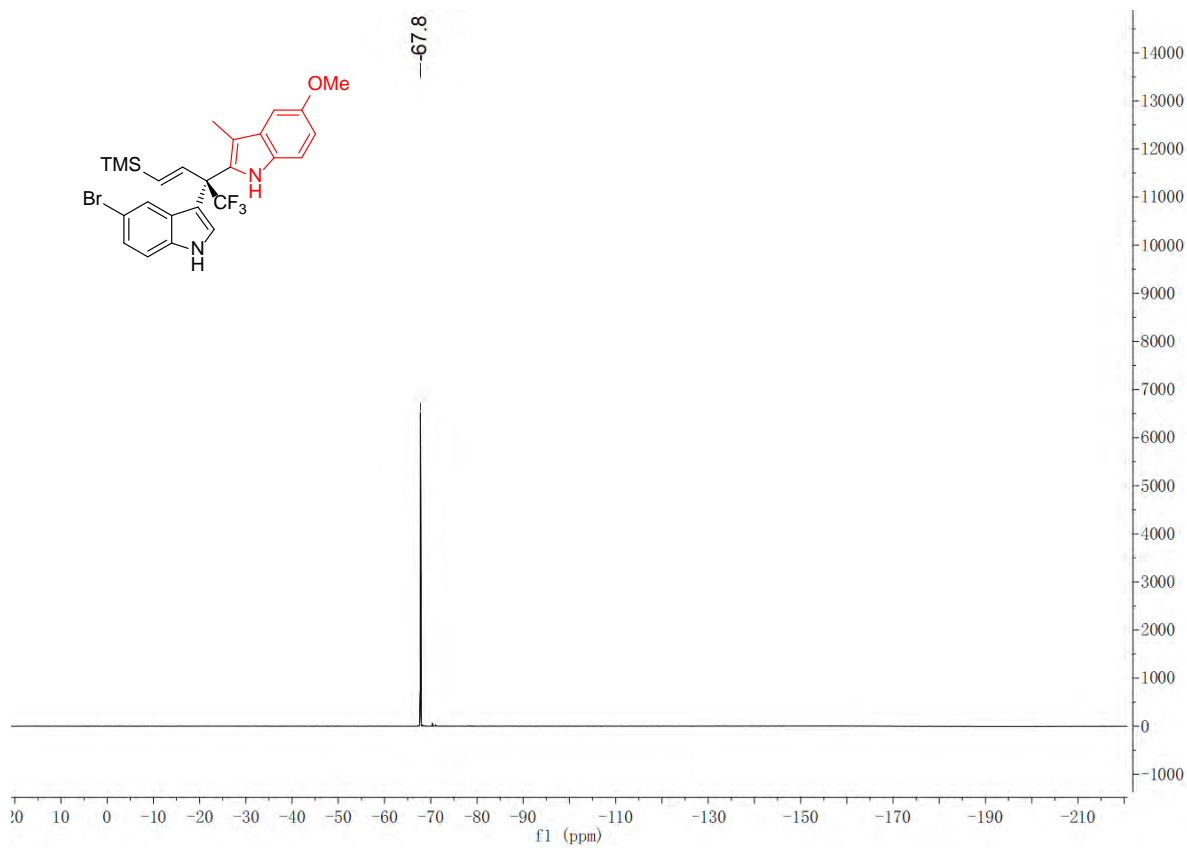

### <sup>1</sup>H NMR of compound 3ag (in CDCl<sub>3</sub>)

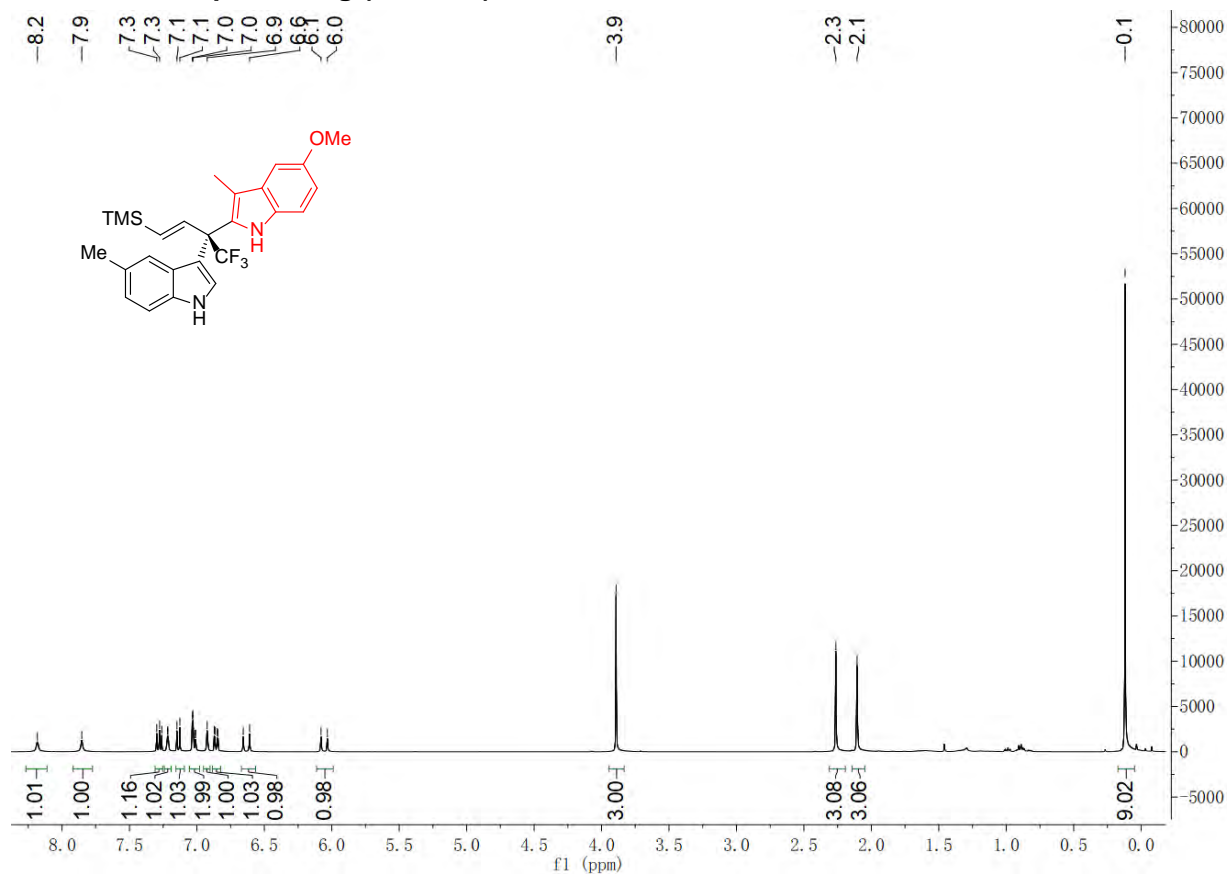

### <sup>13</sup>C NMR of compound 3ag (in CDCl<sub>3</sub>)

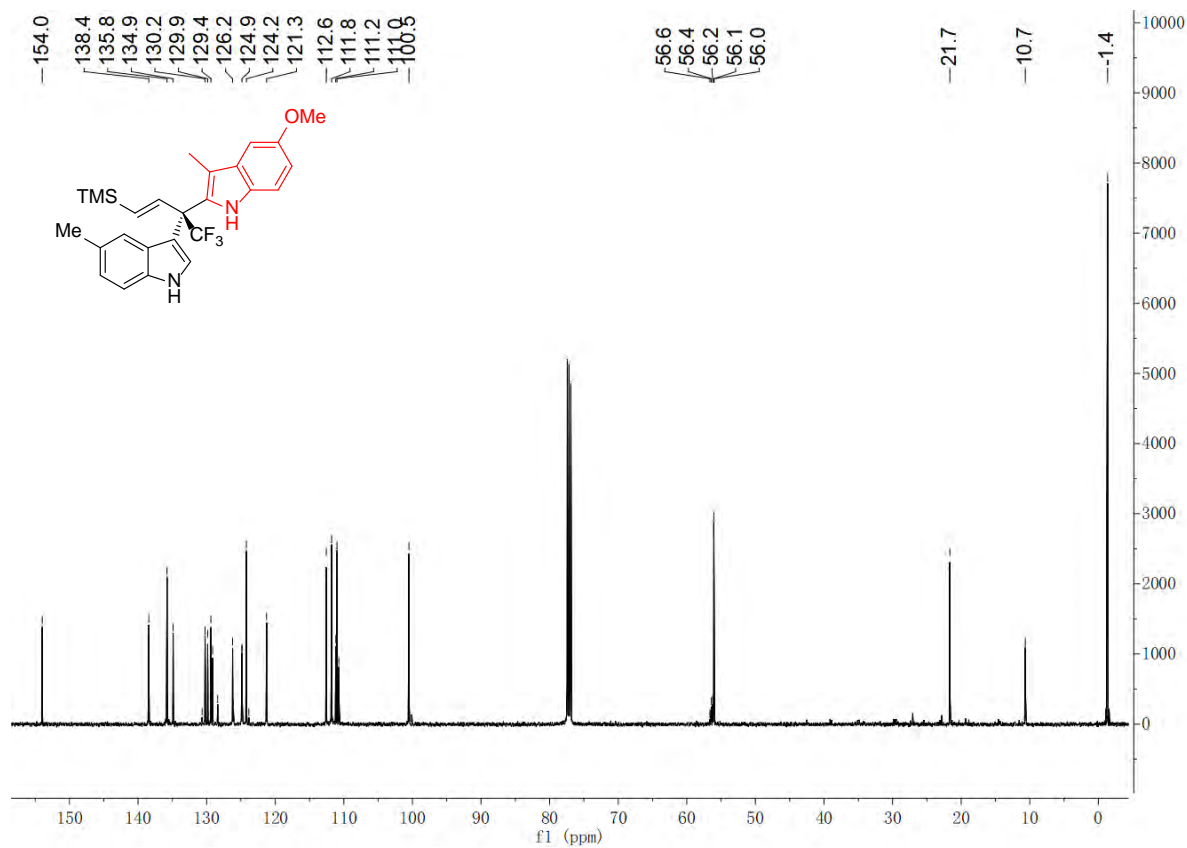

**<sup>19</sup>F NMR of compound 3ag (in CDCl<sub>3</sub>)**

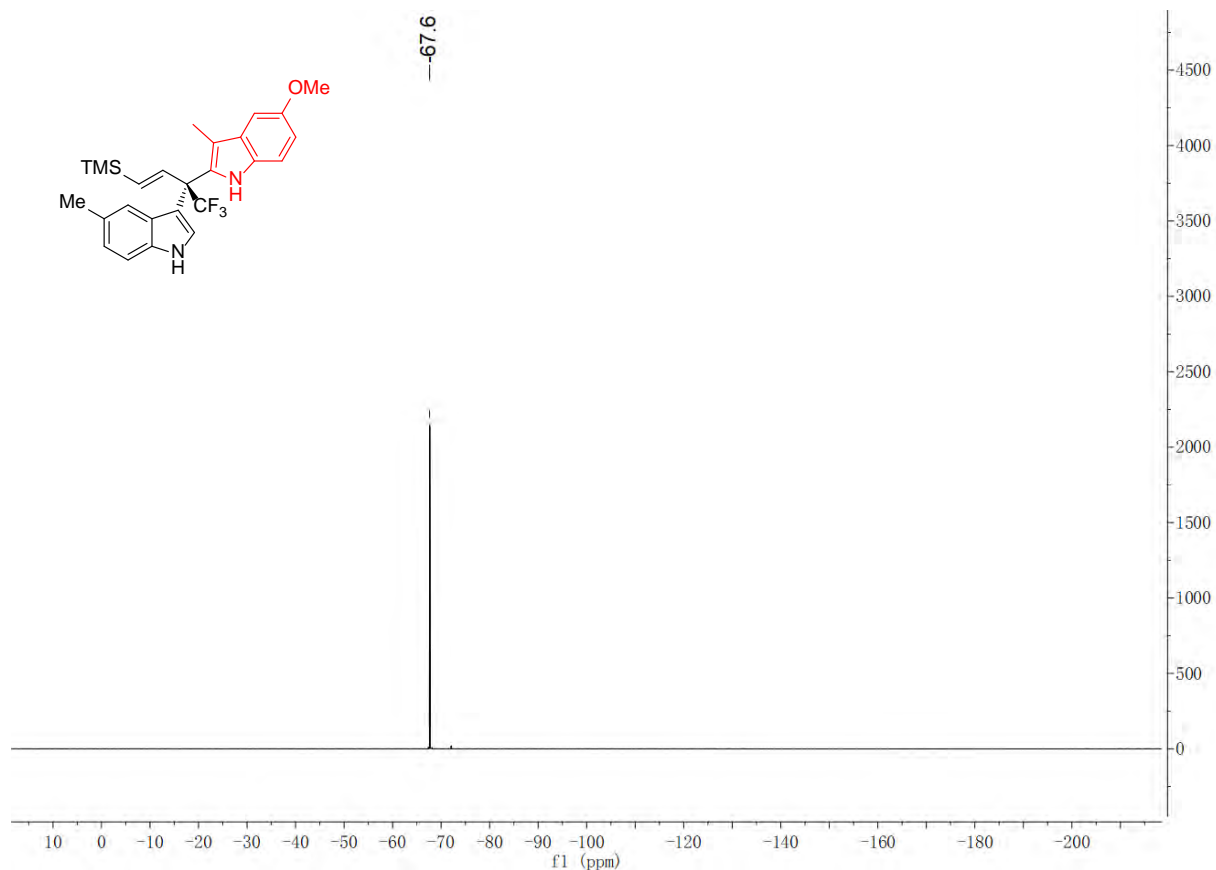

**<sup>1</sup>H NMR of compound 3ah (in CDCl<sub>3</sub>)**

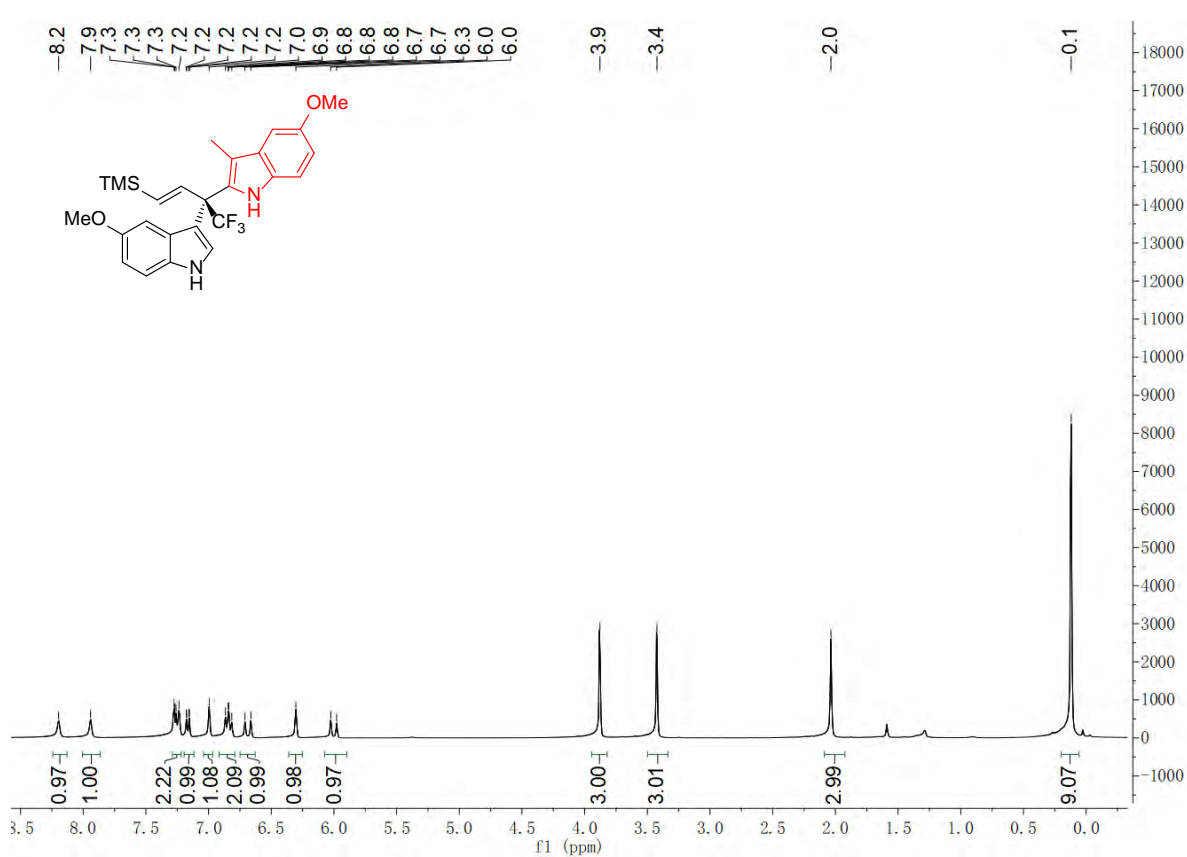

### <sup>13</sup>C NMR of compound 3ah (in CDCl<sub>3</sub>)

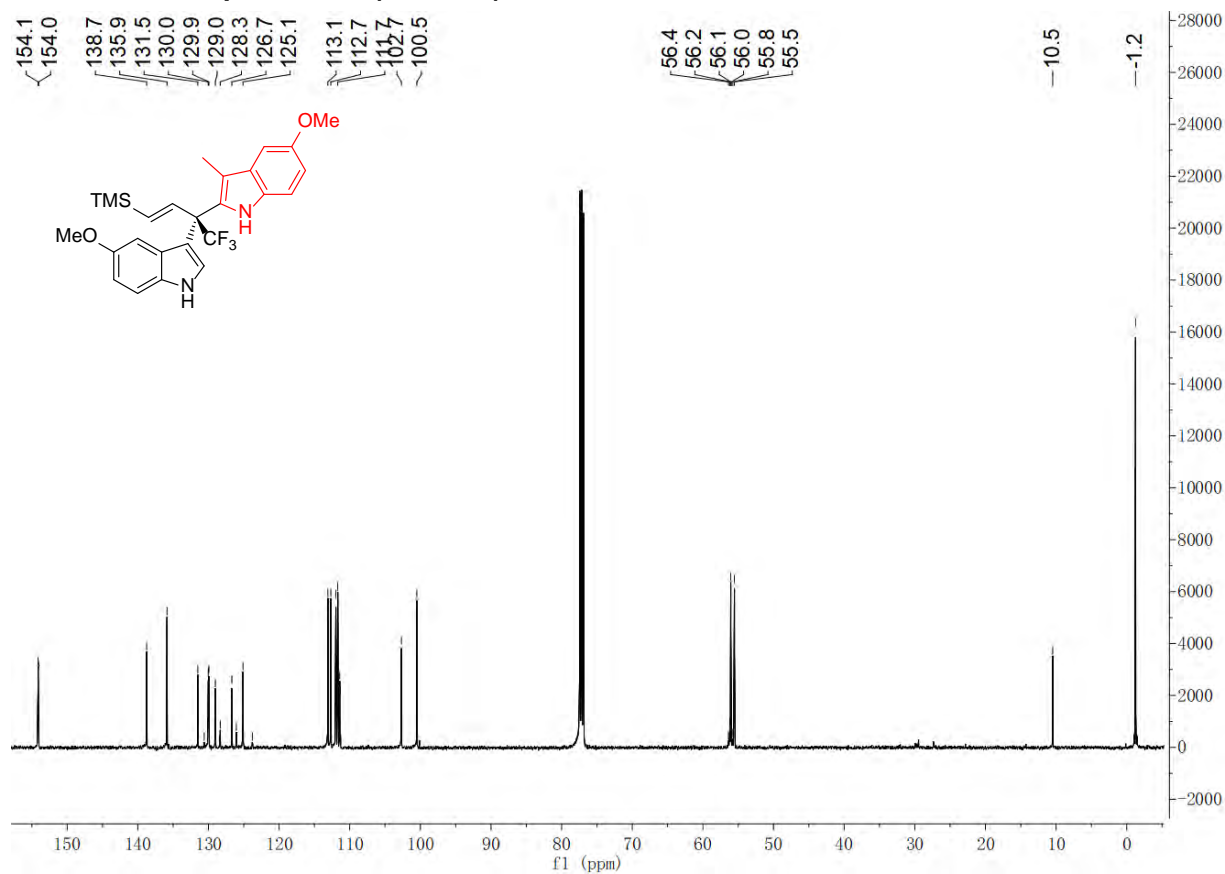

### <sup>19</sup>F NMR of compound 3ah (in CDCl<sub>3</sub>)

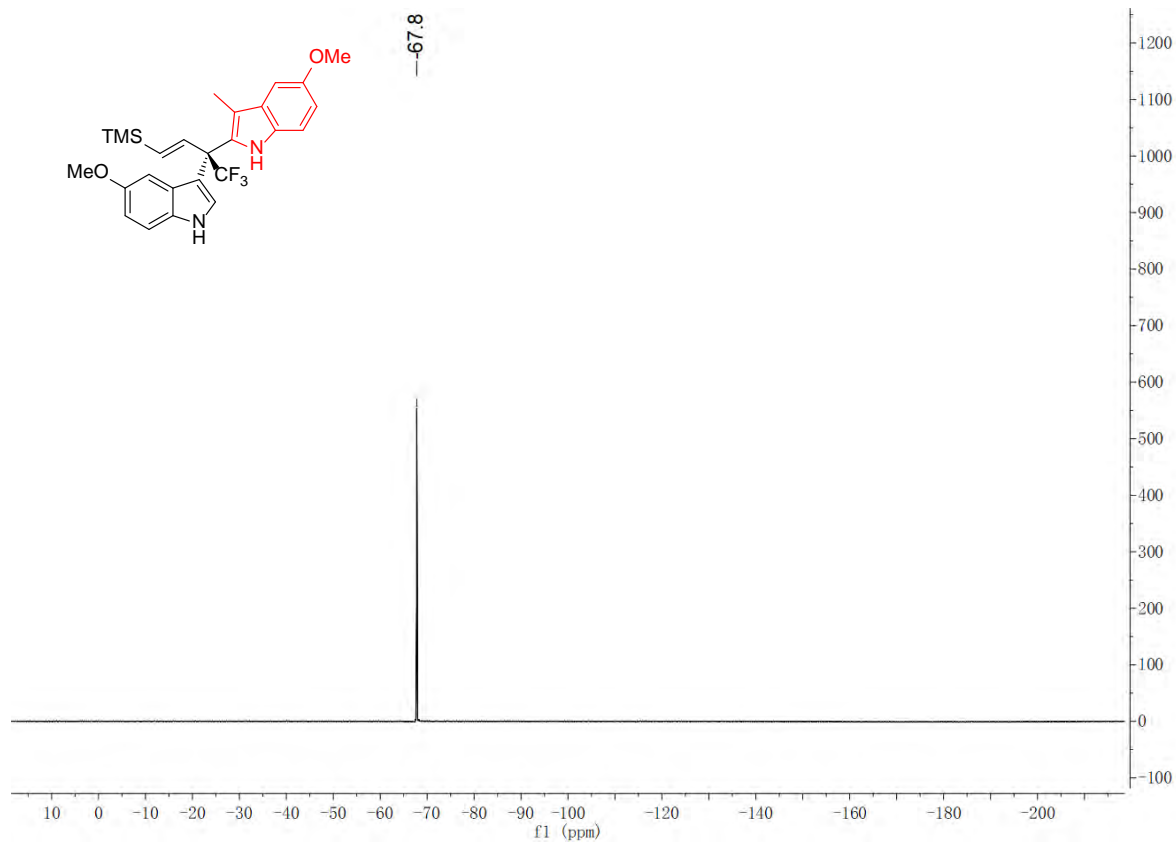

### <sup>1</sup>H NMR of compound 3ai (in CDCl<sub>3</sub>)

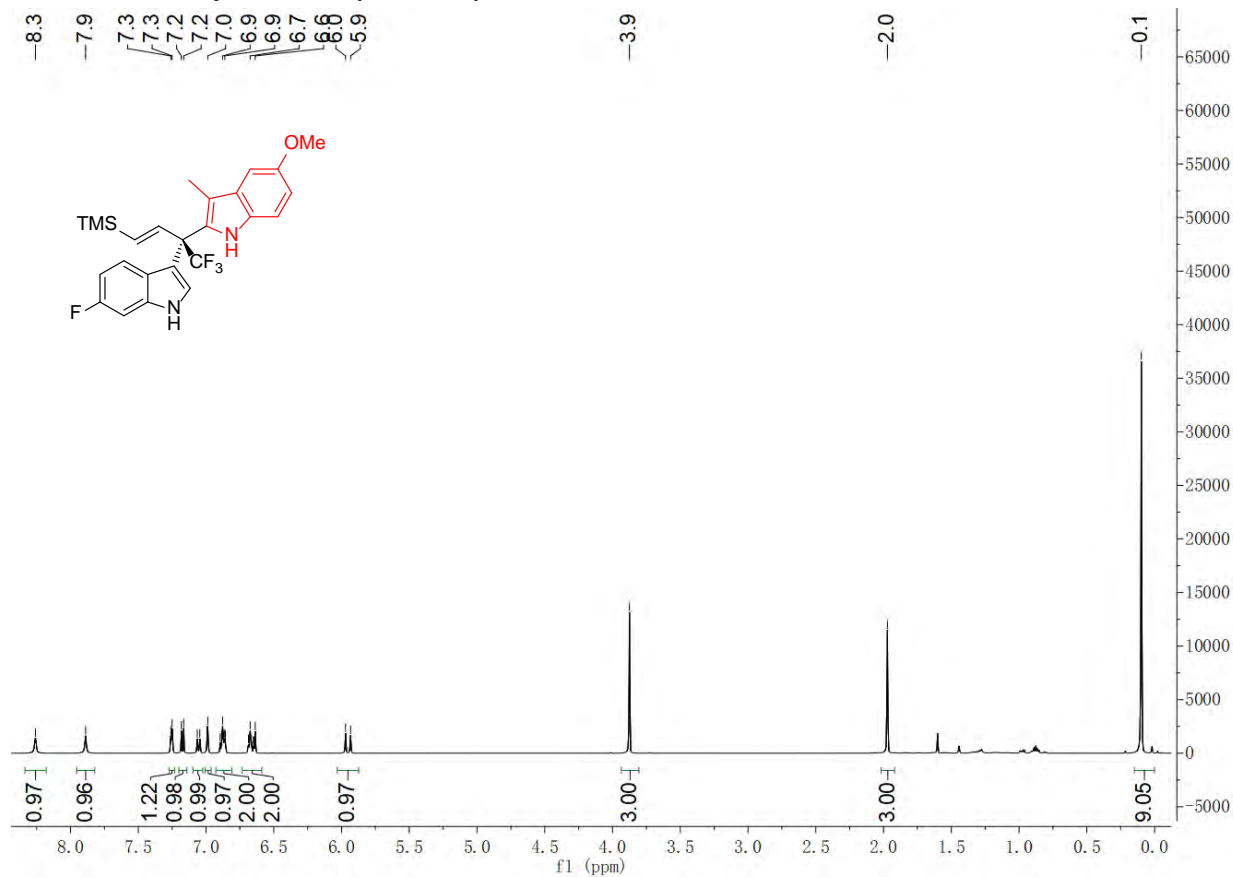

### <sup>13</sup>C NMR of compound 3ai (in CDCl<sub>3</sub>)

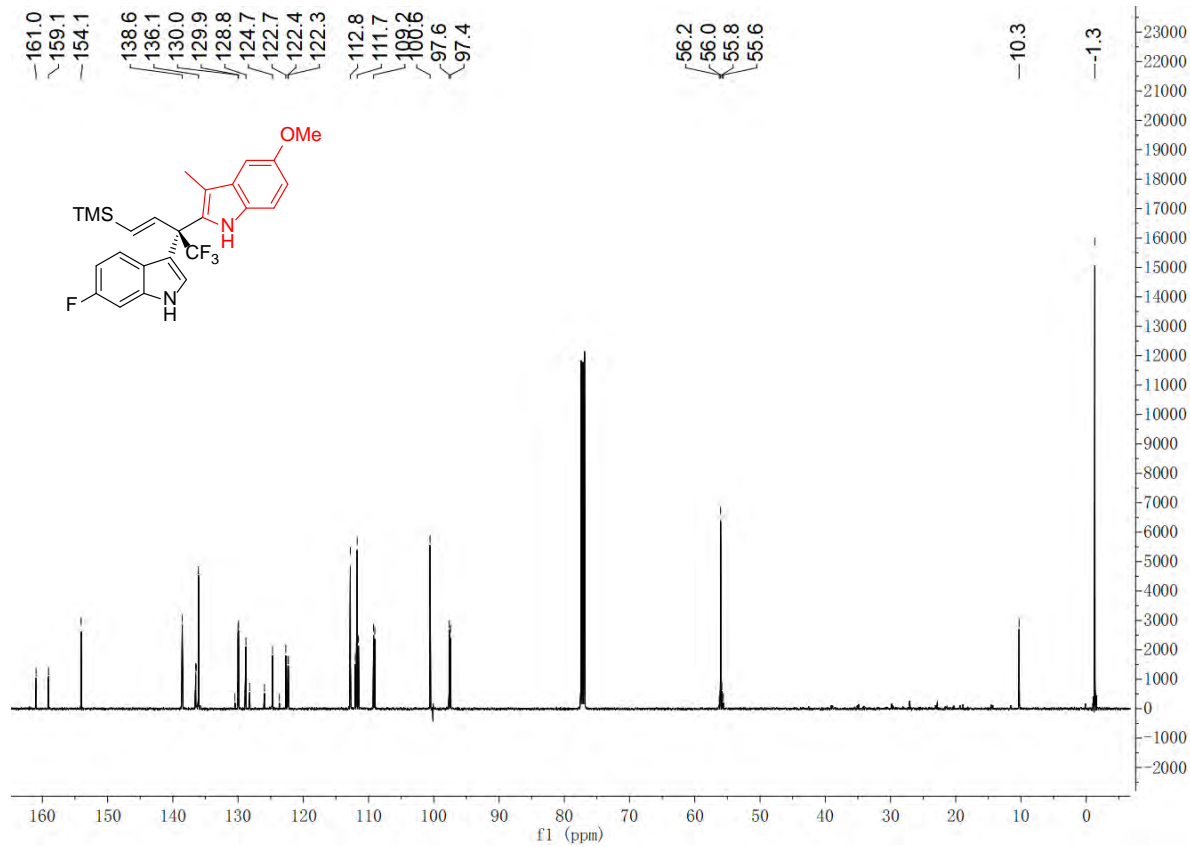

### <sup>19</sup>F NMR of compound 3ai (in CDCl<sub>3</sub>)

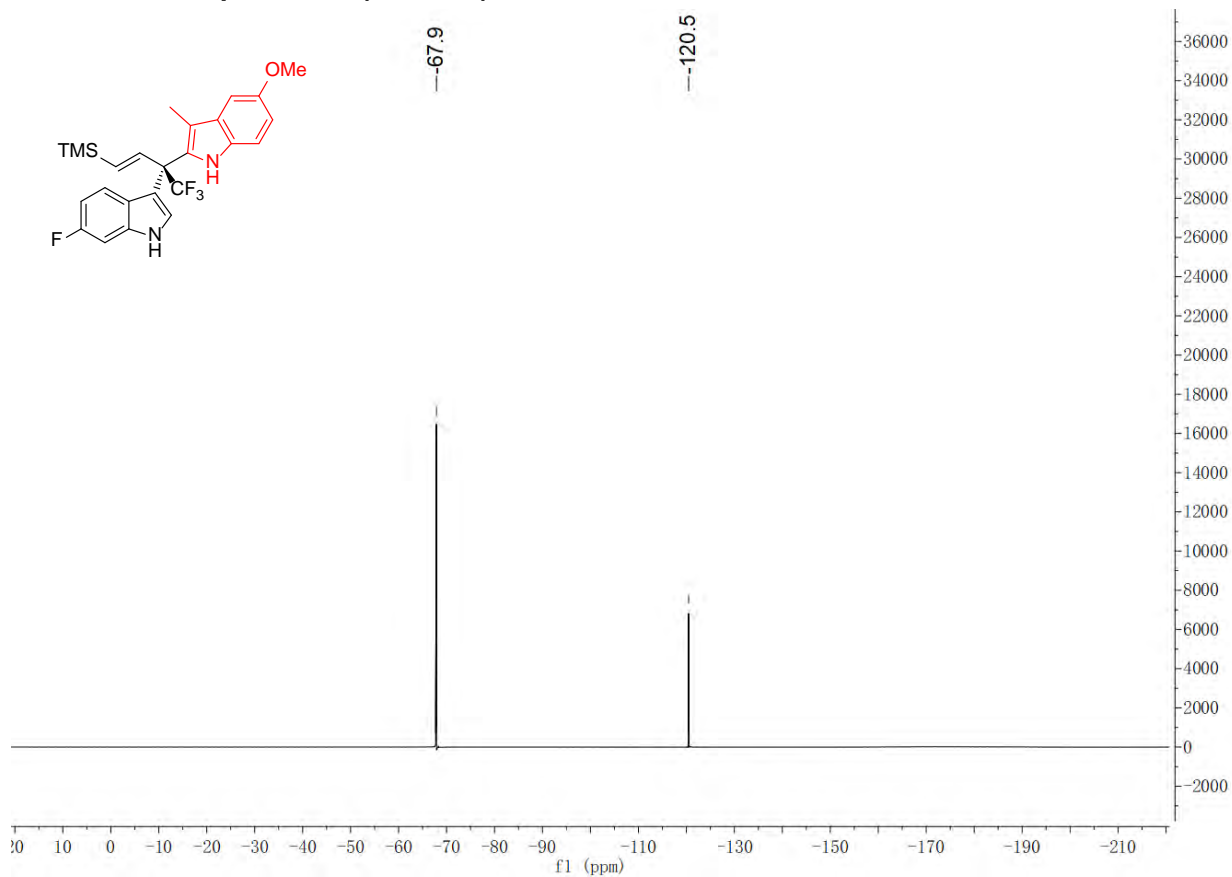

### <sup>1</sup>H NMR of compound 3aj (in CDCl<sub>3</sub>)

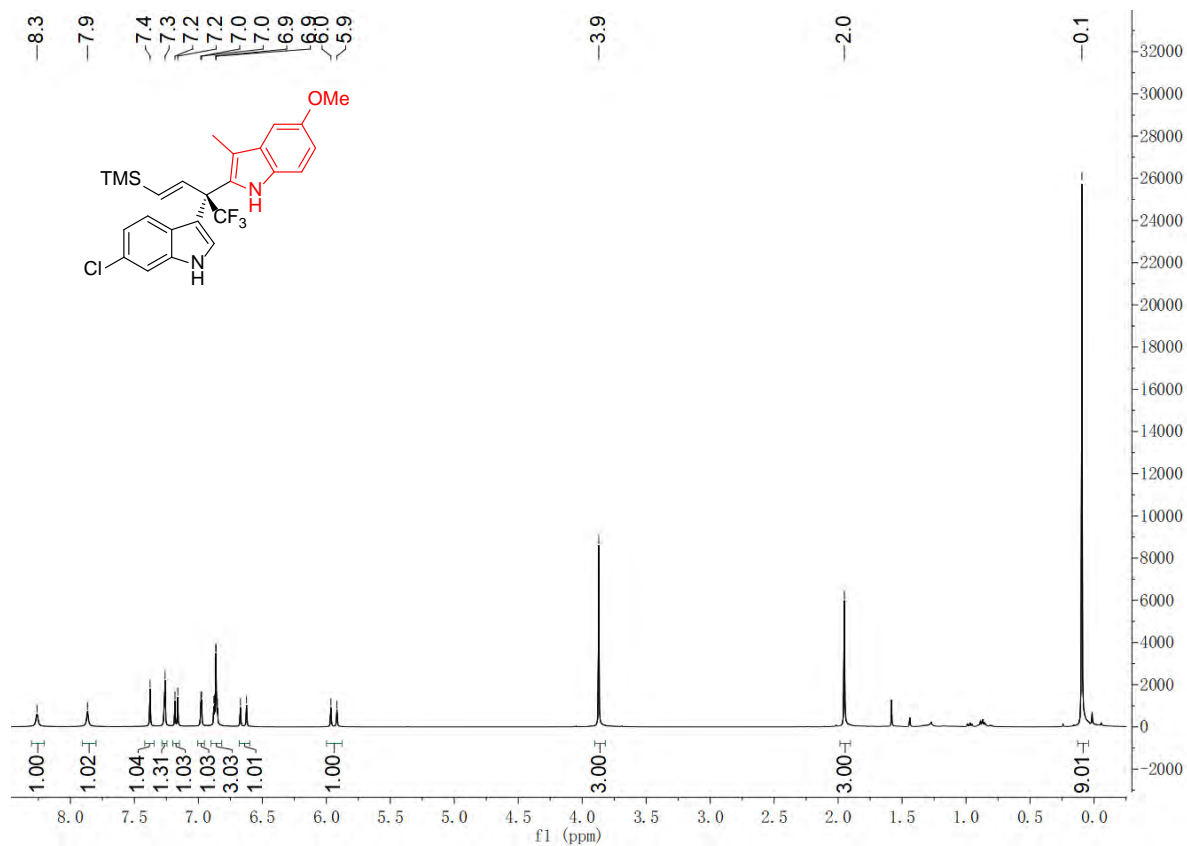

**<sup>13</sup>C NMR of compound 3aj (in CDCl<sub>3</sub>)**

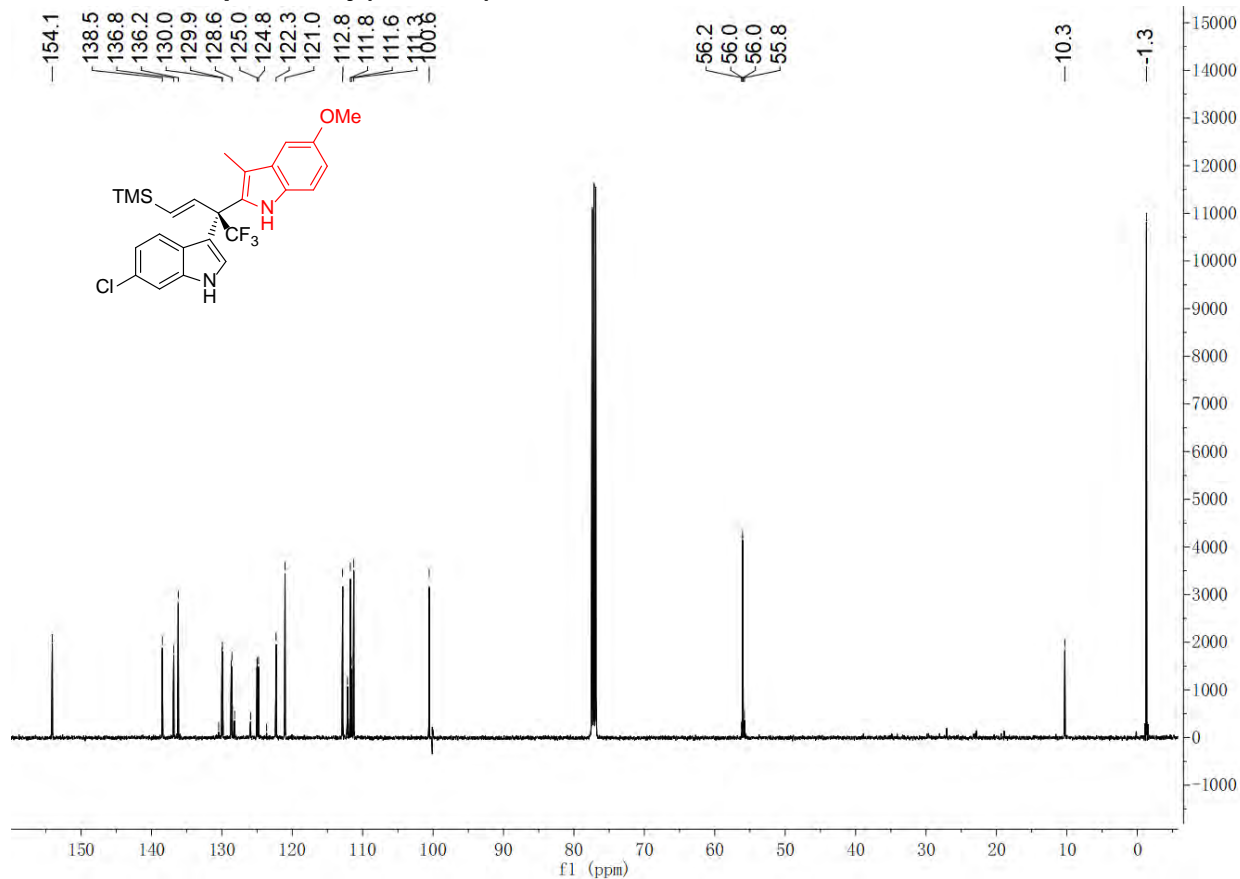

**<sup>19</sup>F NMR of compound 3aj (in CDCl<sub>3</sub>)**

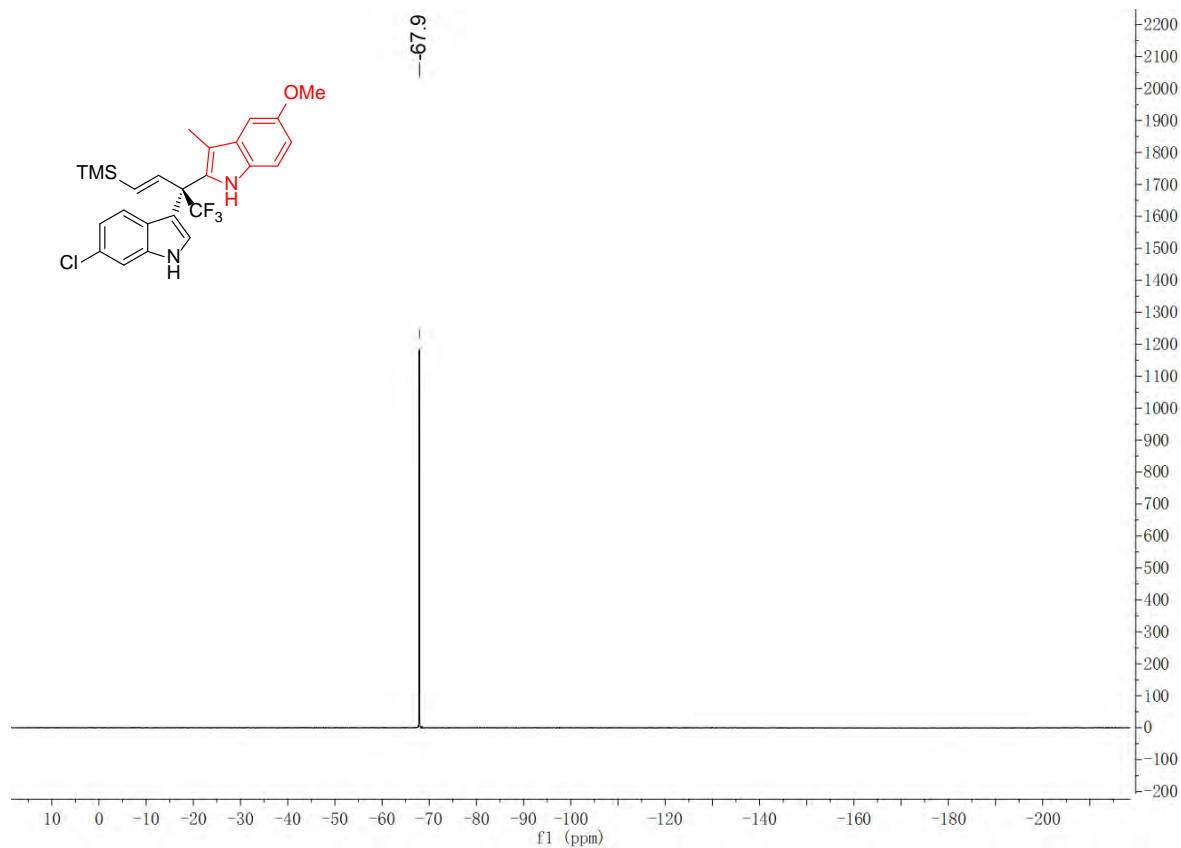

### <sup>1</sup>H NMR of compound 3ak (in CDCl<sub>3</sub>)

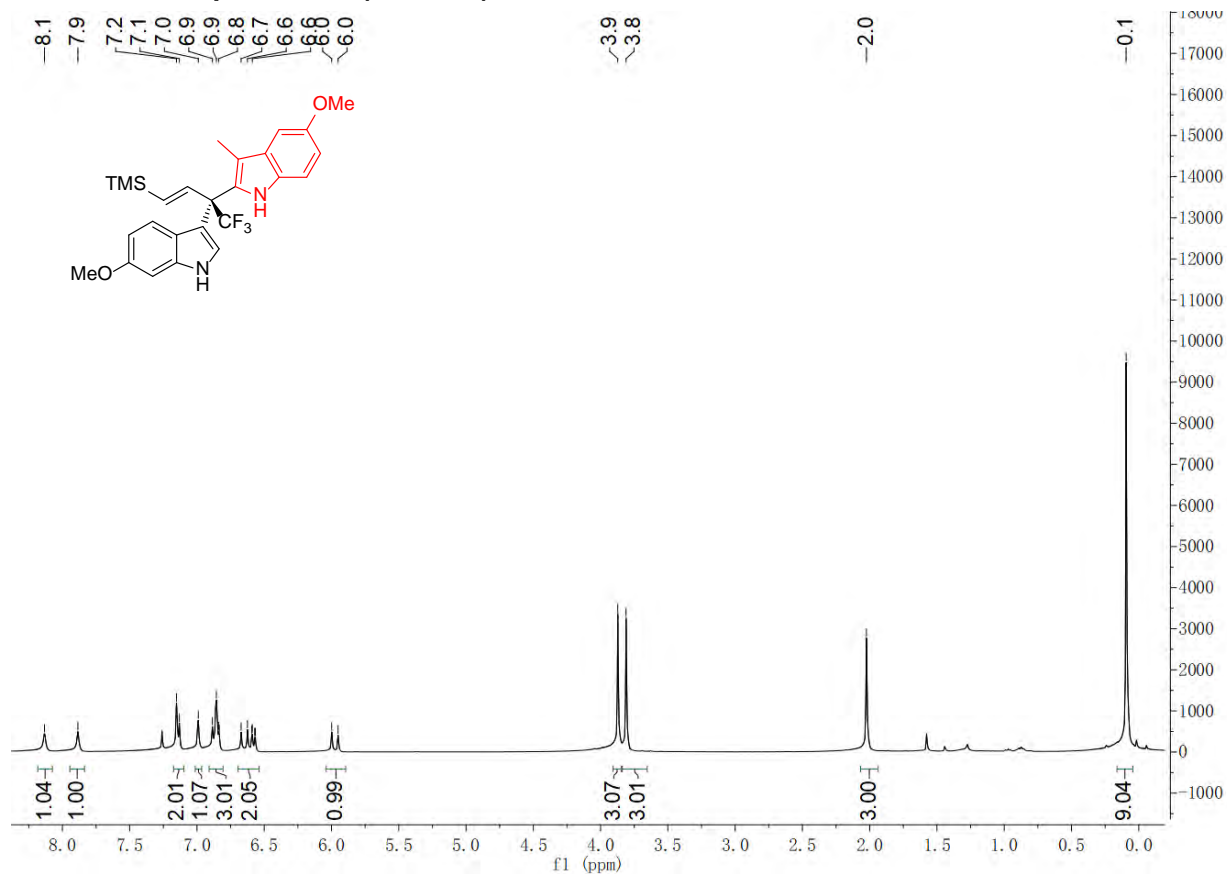

### <sup>13</sup>C NMR of compound 3ak (in CDCl<sub>3</sub>)

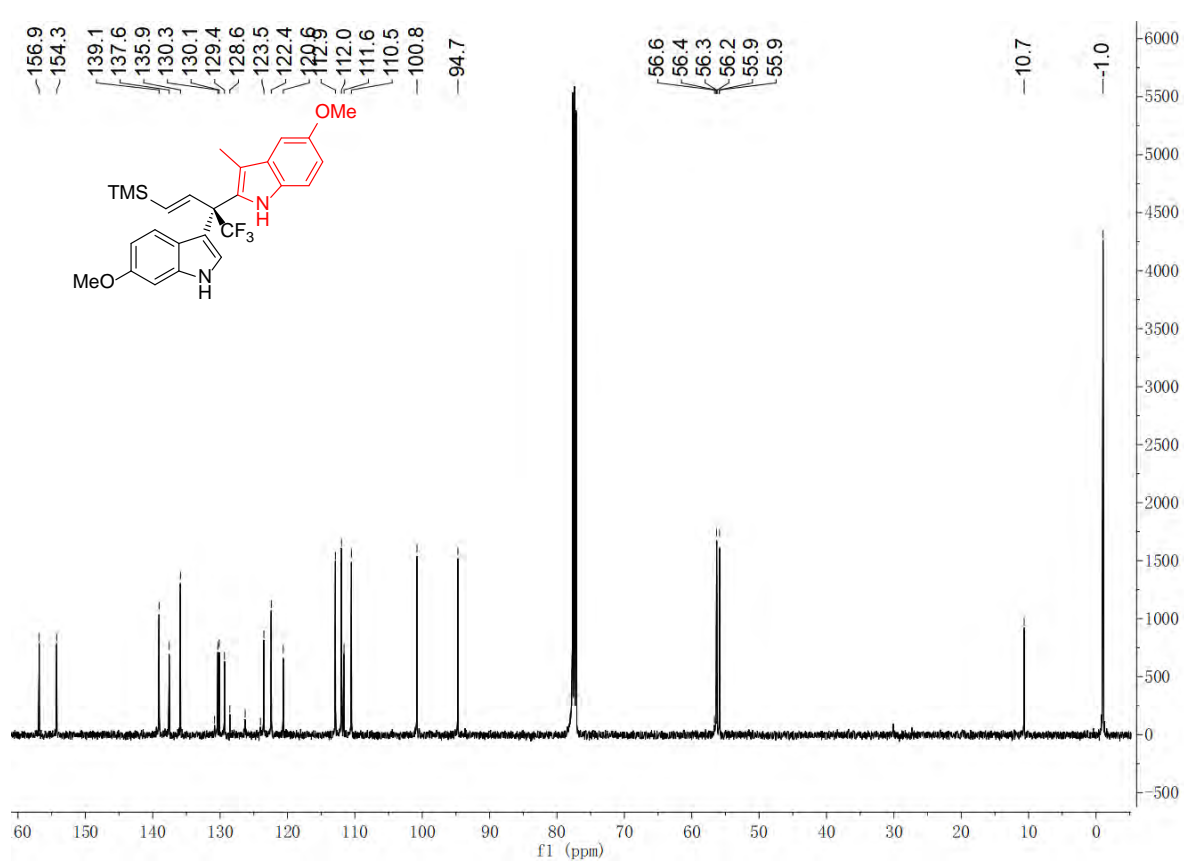



### $^{19}\text{F}$ NMR of compound 3ak (in $\text{CDCl}_3$ )

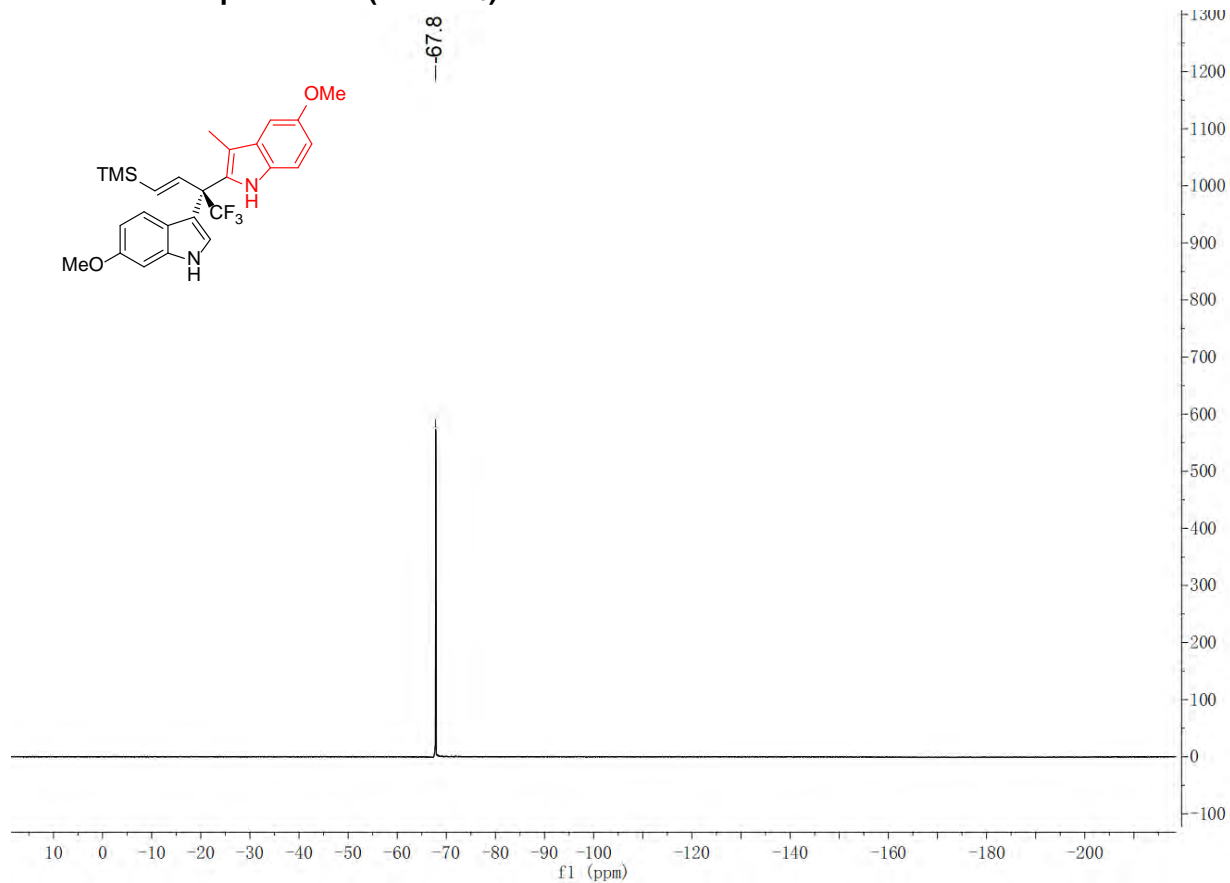

### $^1\text{H}$ NMR of compound 3al (in $\text{CDCl}_3$ )

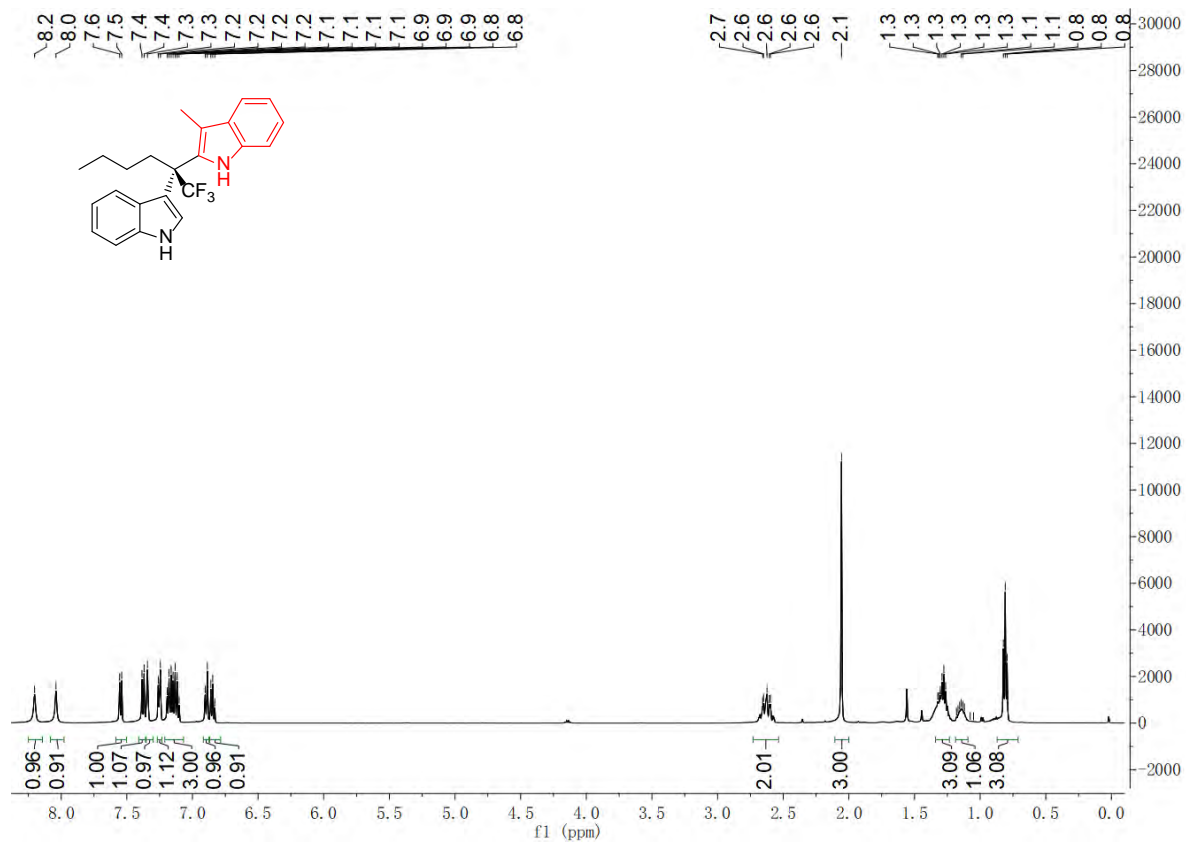

**<sup>13</sup>C NMR of compound 3al (in CDCl<sub>3</sub>)**

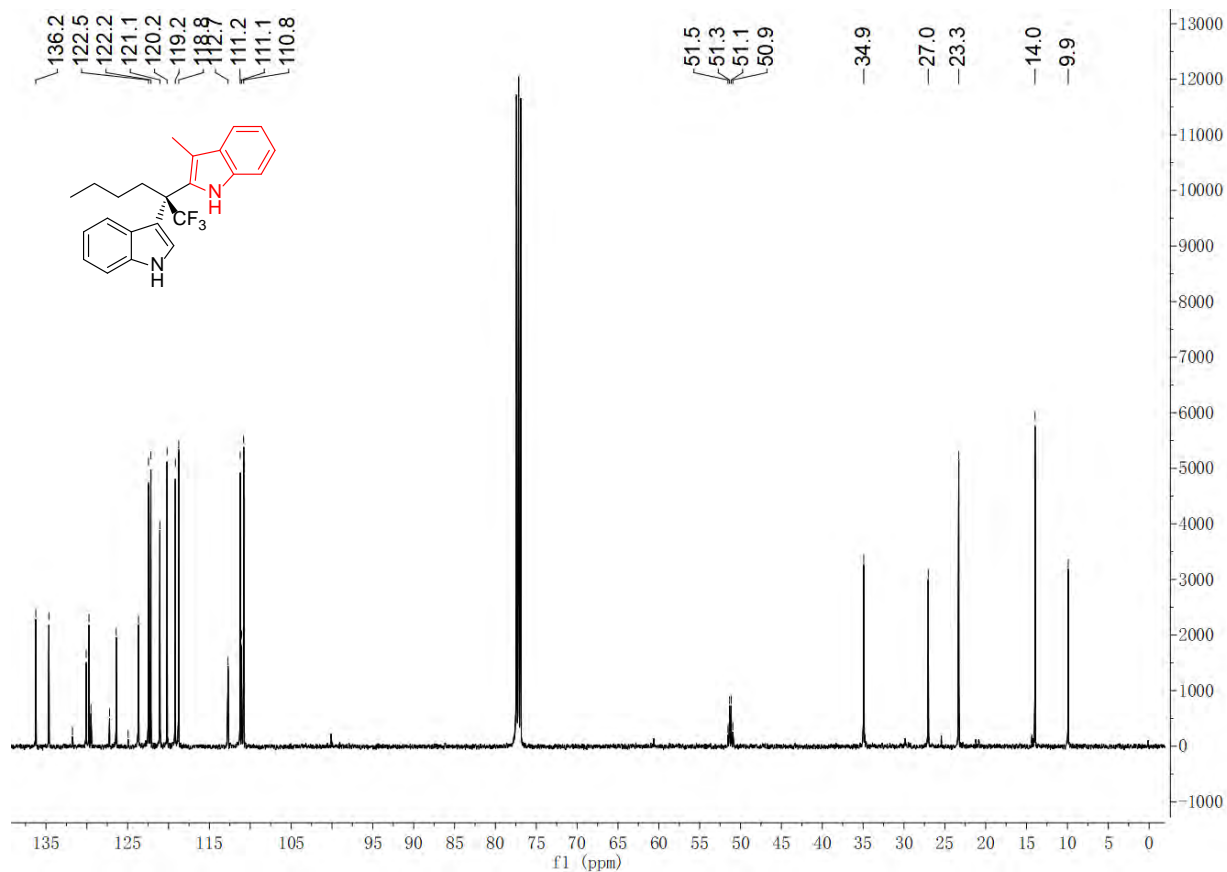

**<sup>19</sup>F NMR of compound 3al (in CDCl<sub>3</sub>)**

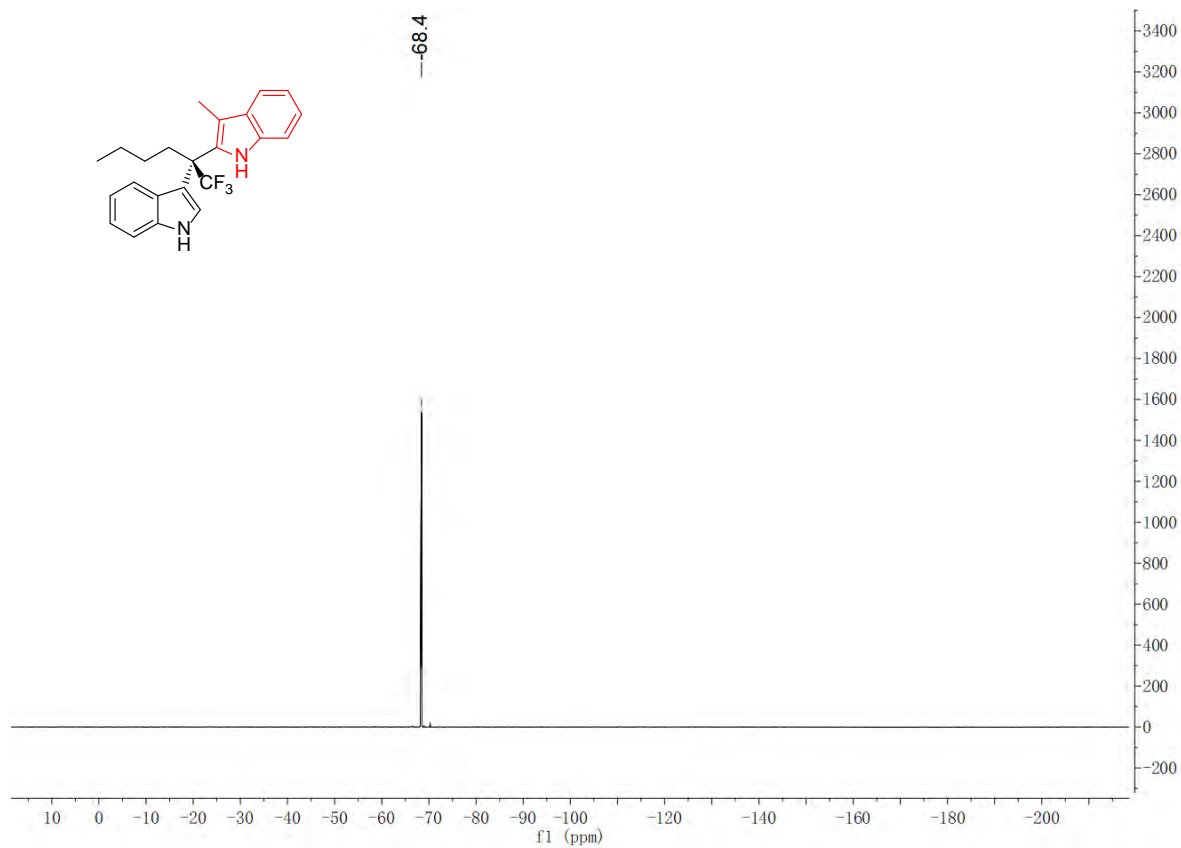

### <sup>1</sup>H NMR of compound 3am (in CDCl<sub>3</sub>)

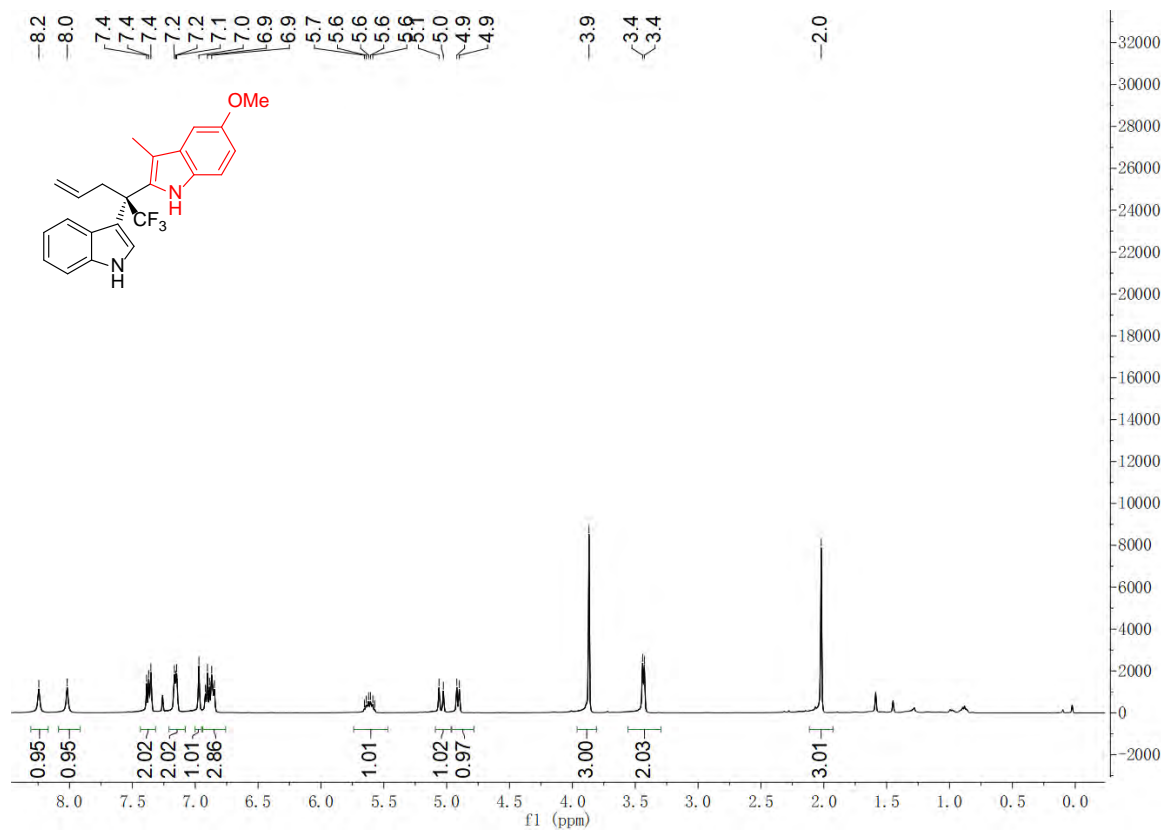

### <sup>13</sup>C NMR of compound 3am (in CDCl<sub>3</sub>)

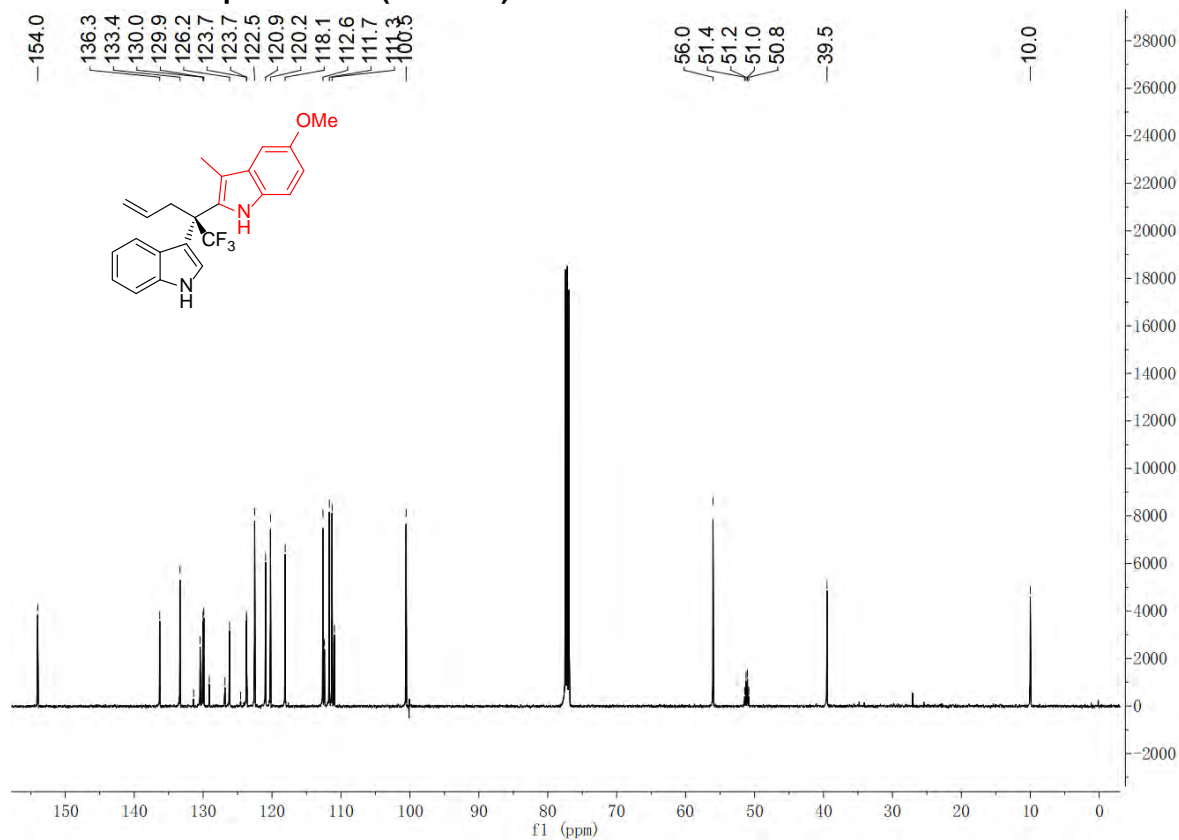

### $^{19}\text{F}$ NMR of compound 3am (in $\text{CDCl}_3$ )

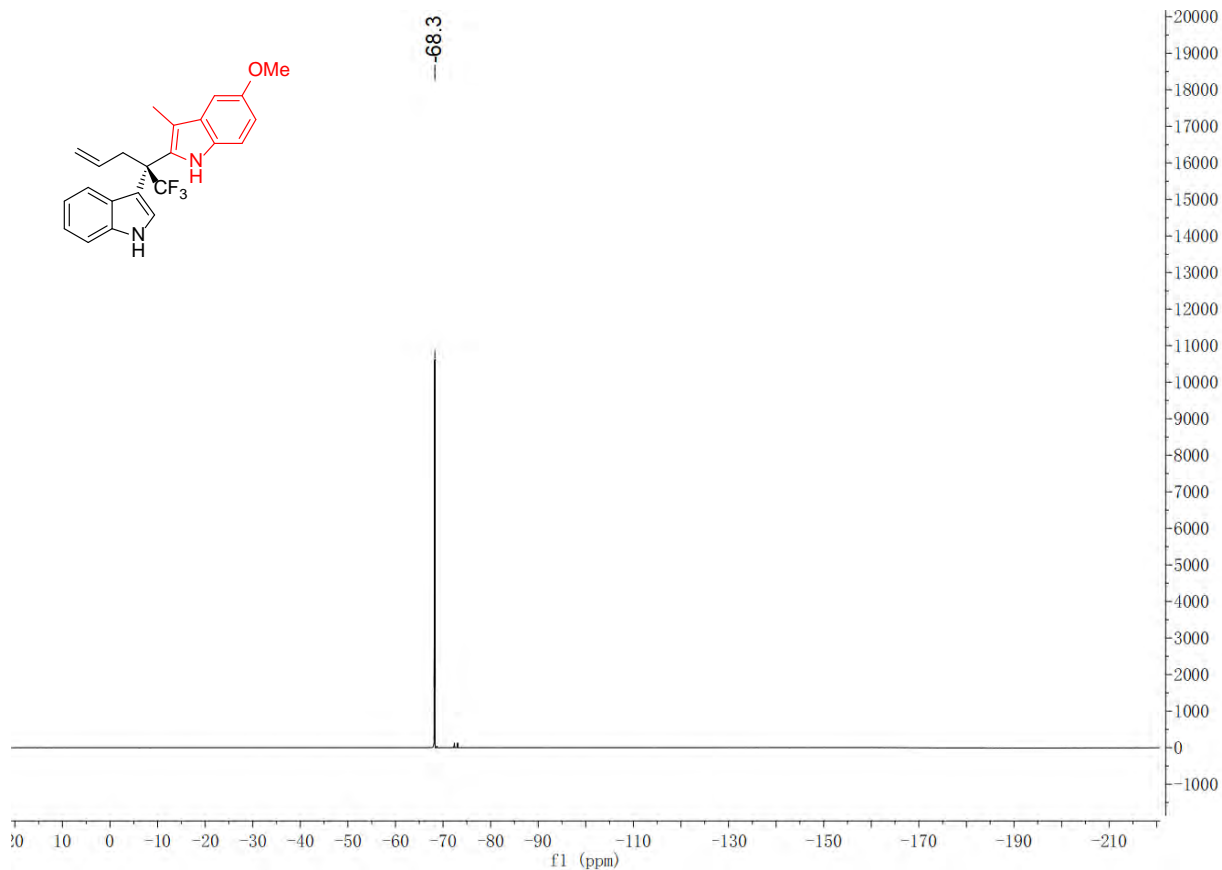

### $^1\text{H}$ NMR of compound 3an (in $\text{CDCl}_3$ )

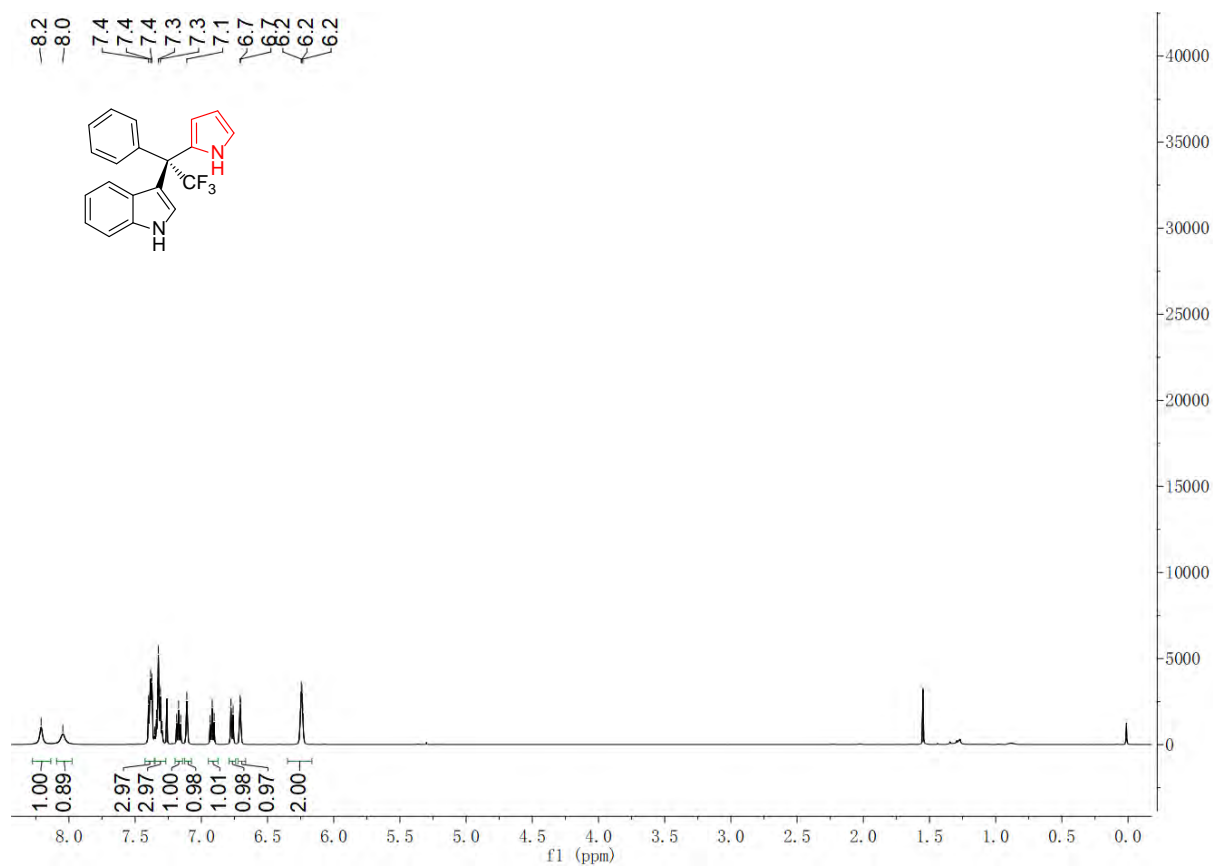

**<sup>13</sup>C NMR of compound 3an (in CDCl<sub>3</sub>)**

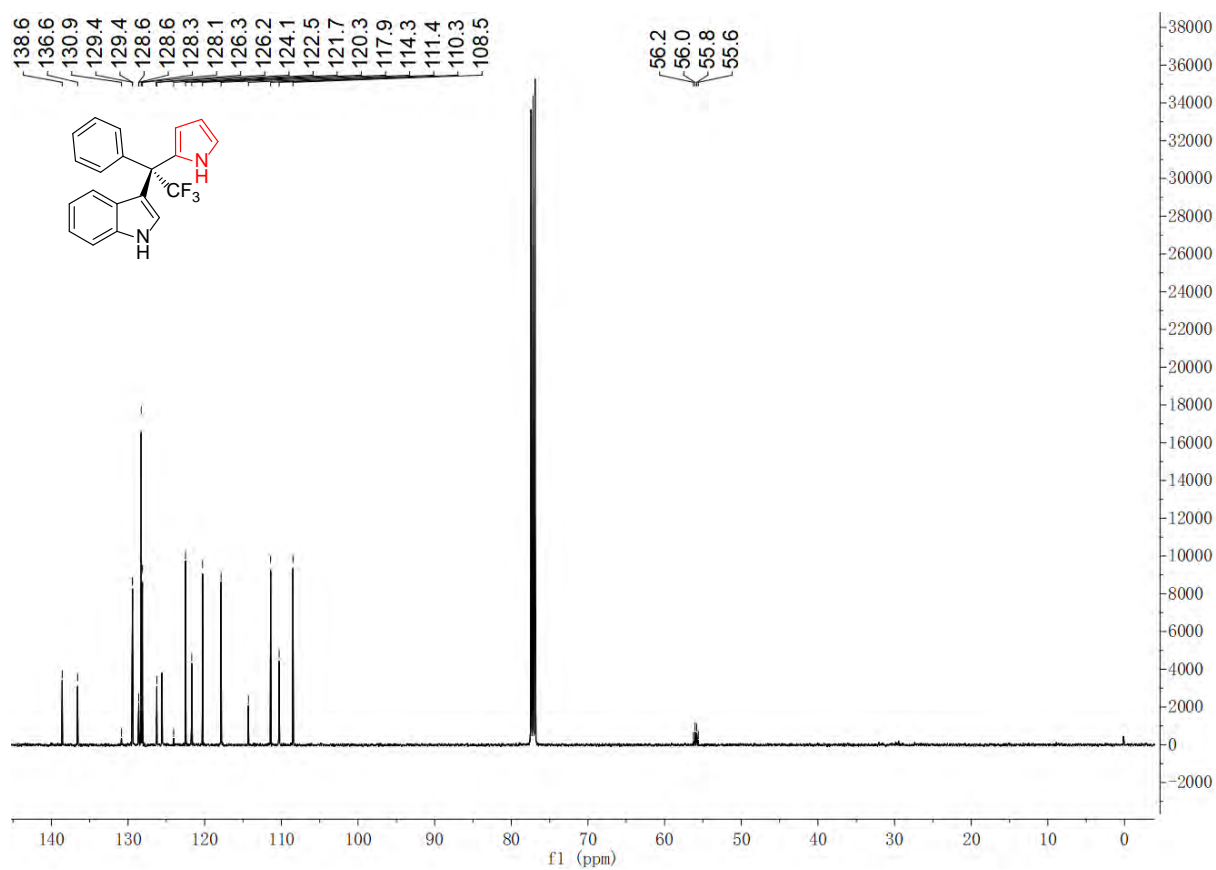

**<sup>19</sup>F NMR of compound 3an (in CDCl<sub>3</sub>)**

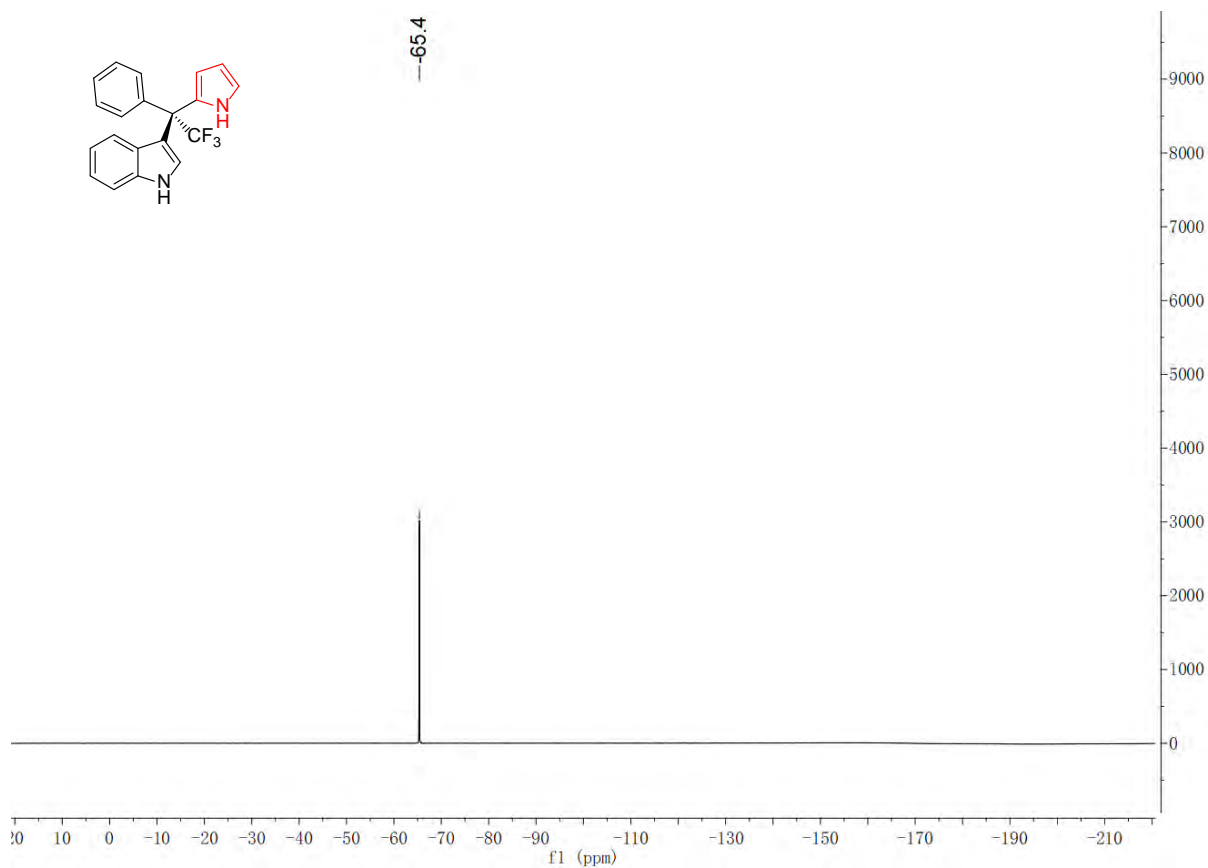

### <sup>1</sup>H NMR of compound 5a (in CDCl<sub>3</sub>)

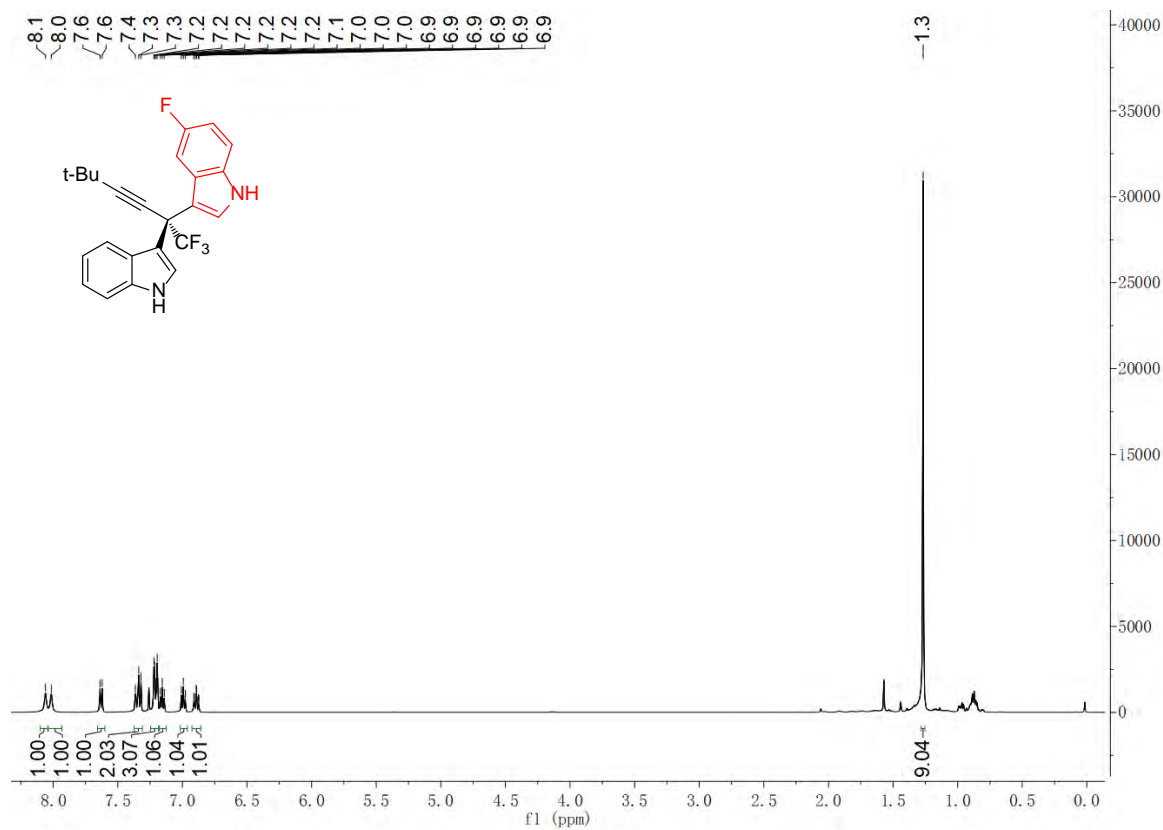

### <sup>13</sup>C NMR of compound 5a (in CDCl<sub>3</sub>)

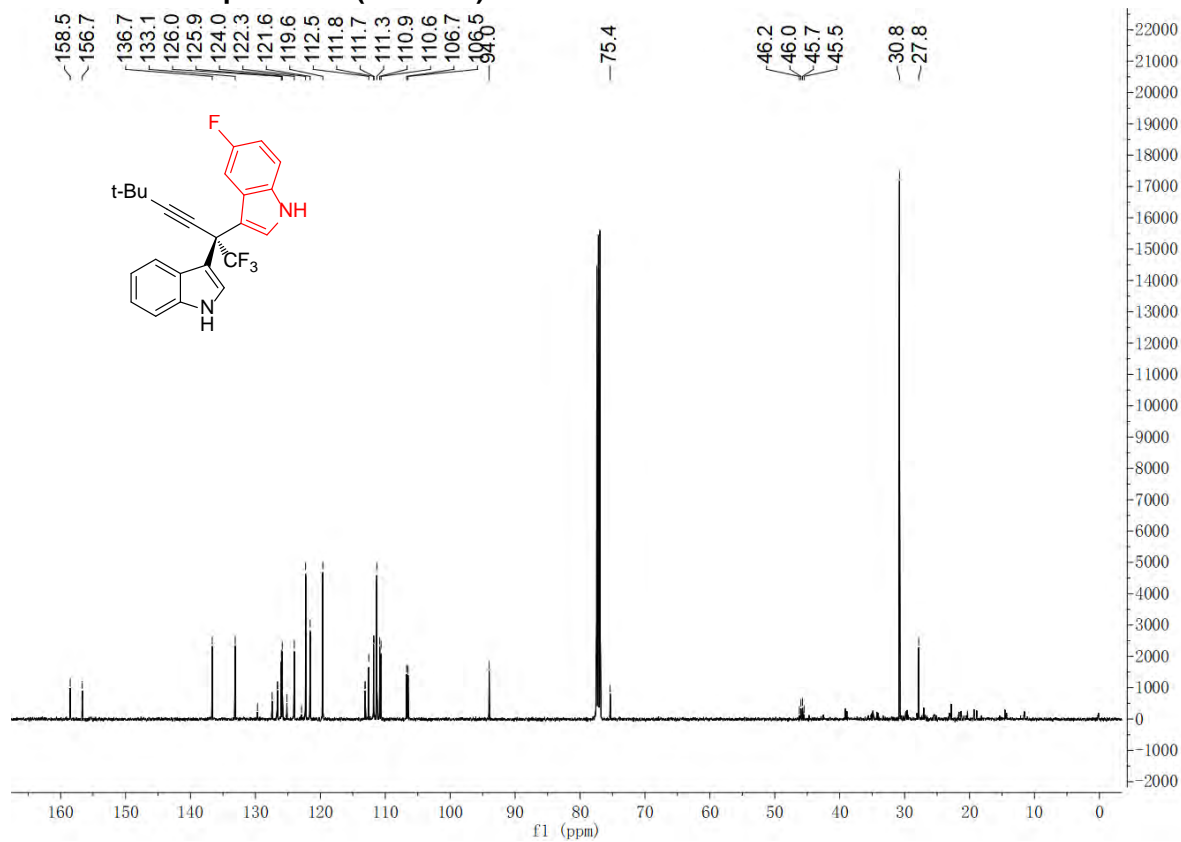

### <sup>19</sup>F NMR of compound 5a (in CDCl<sub>3</sub>)

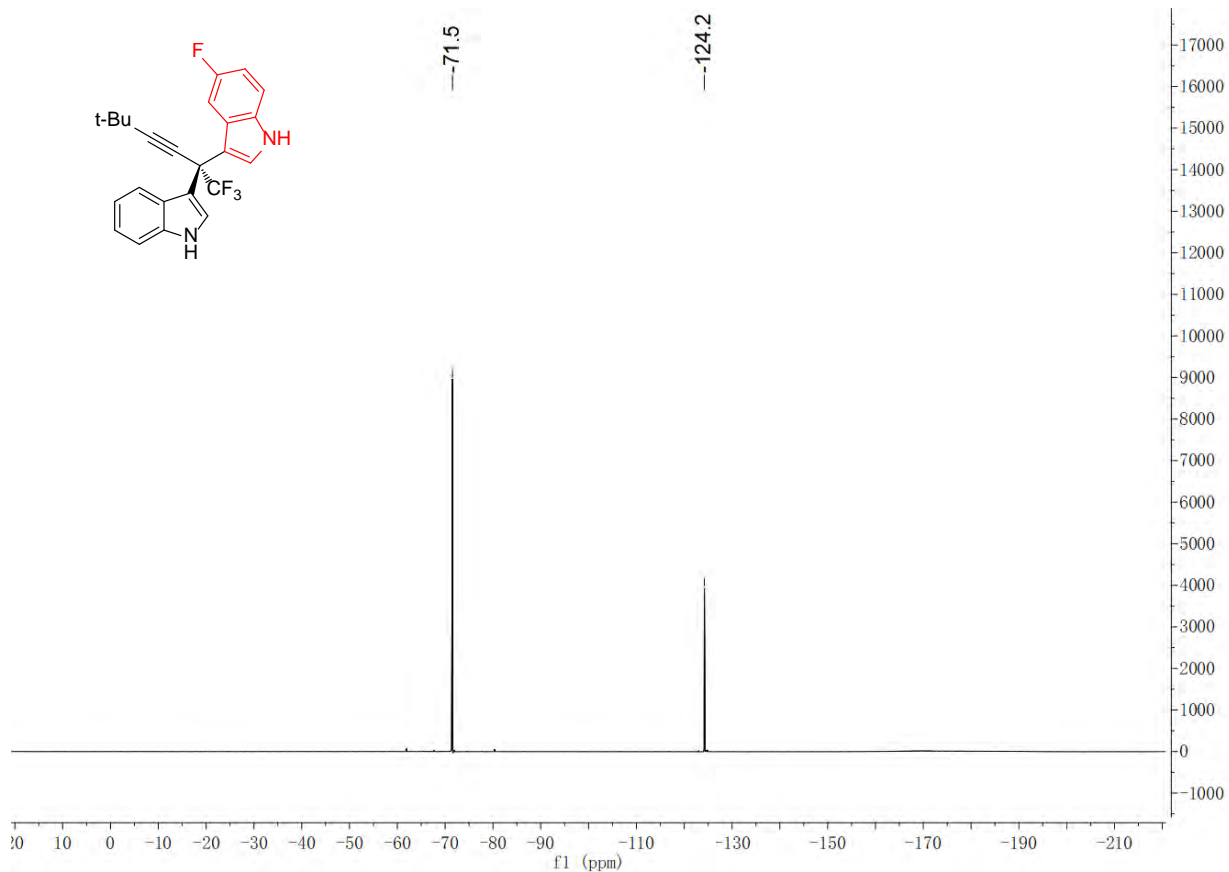

### <sup>1</sup>H NMR of compound 5b (in CDCl<sub>3</sub>)

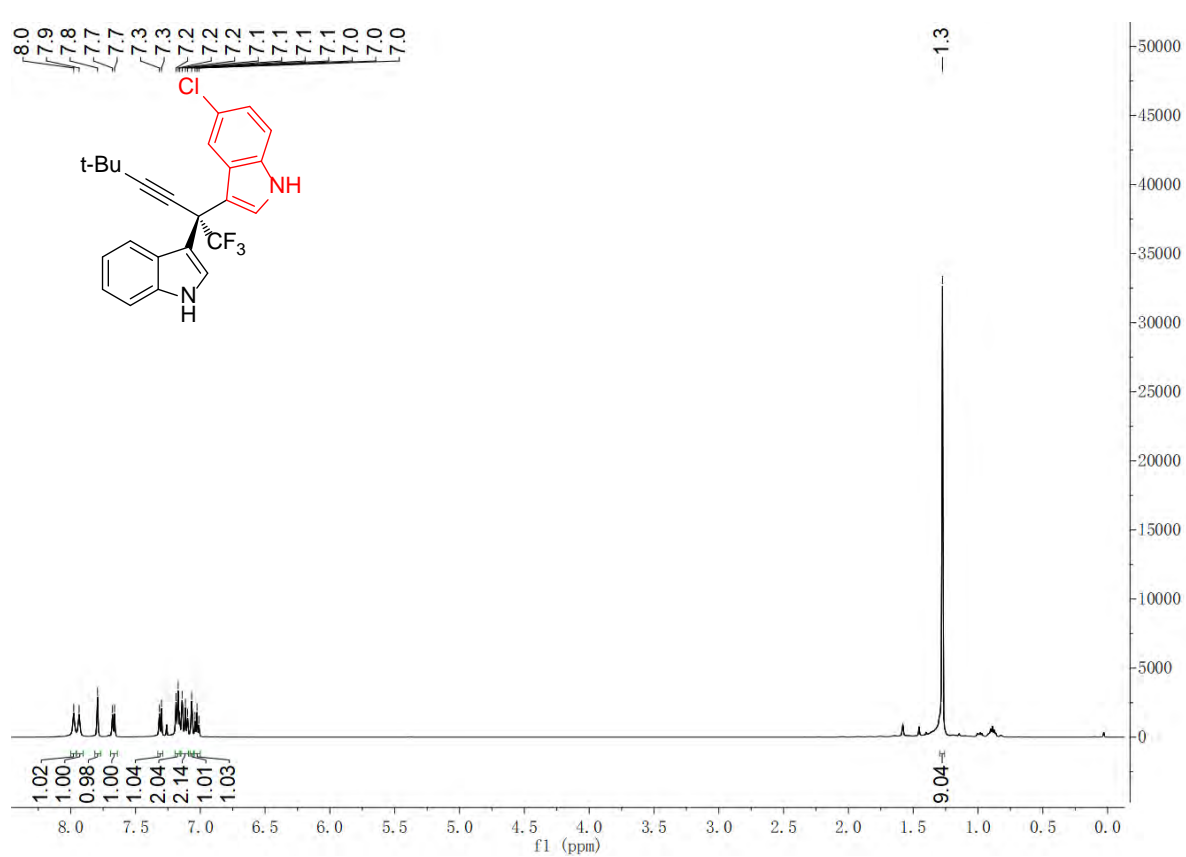

### <sup>13</sup>C NMR of compound 5b (in CDCl<sub>3</sub>)

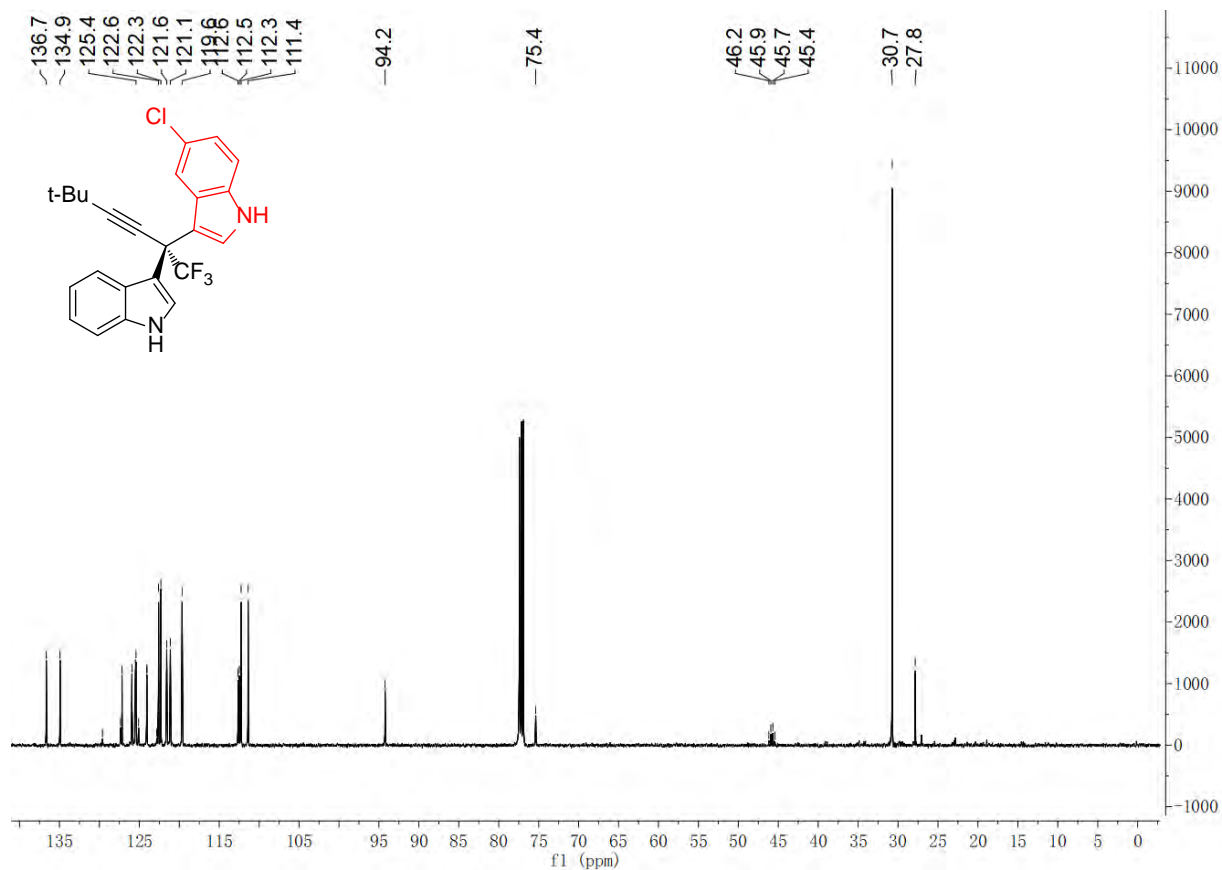

### <sup>19</sup>F NMR of compound 5b (in CDCl<sub>3</sub>)

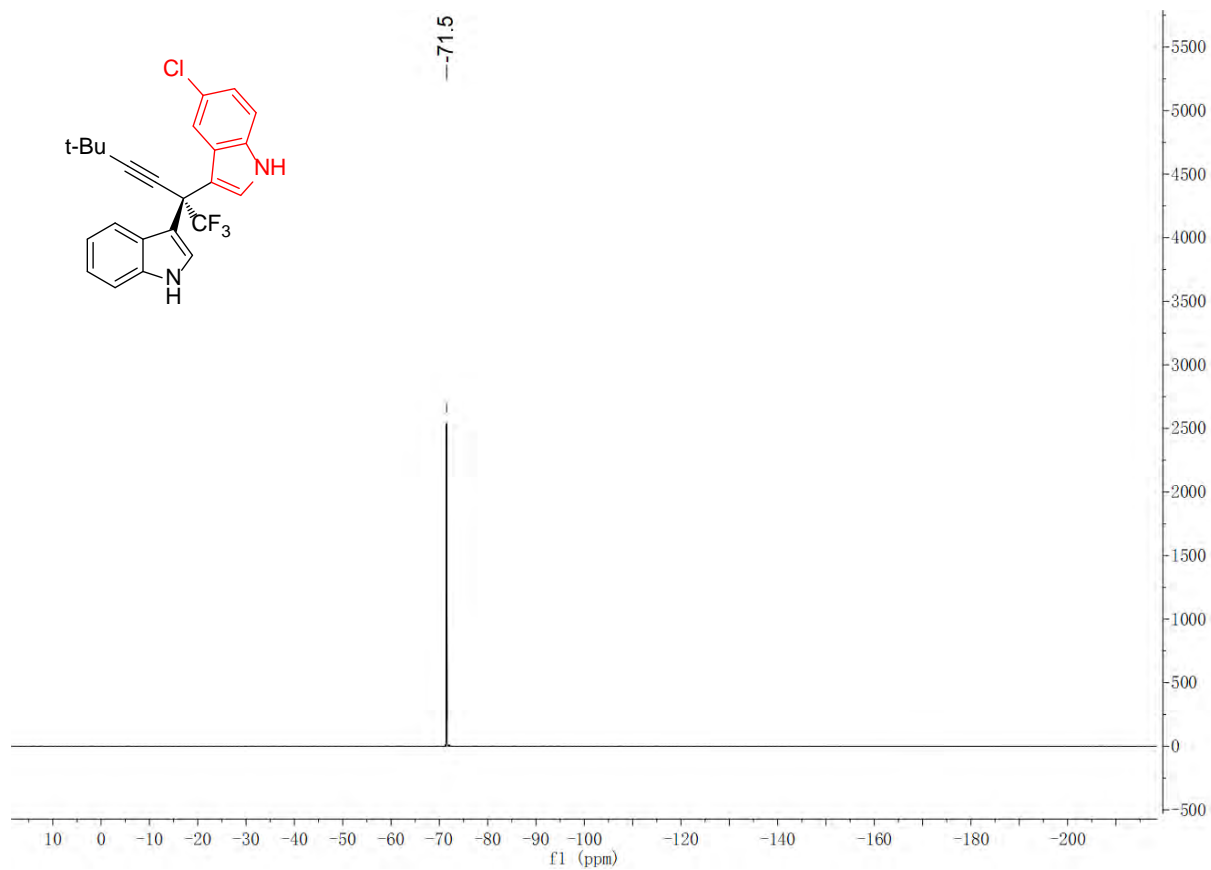



### <sup>1</sup>H NMR of compound 5c (in CDCl<sub>3</sub>)

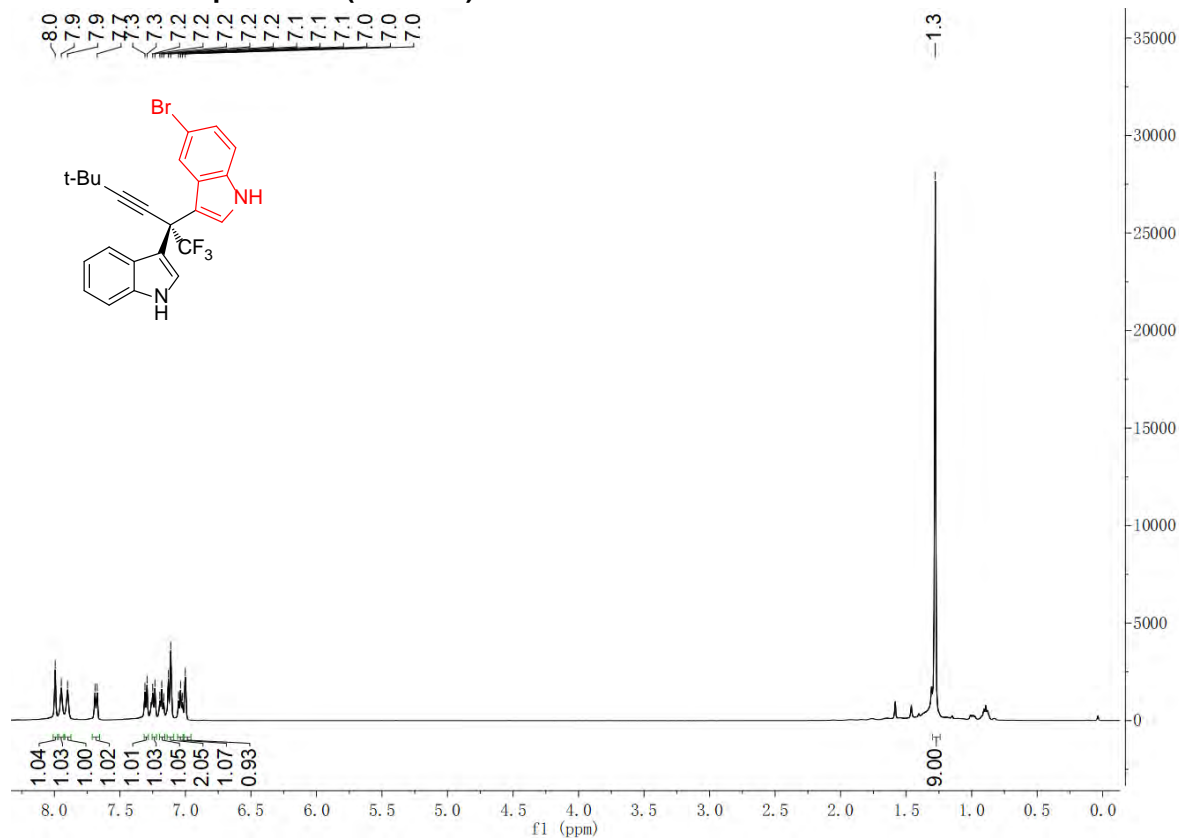

### <sup>13</sup>C NMR of compound 5c (in CDCl<sub>3</sub>)

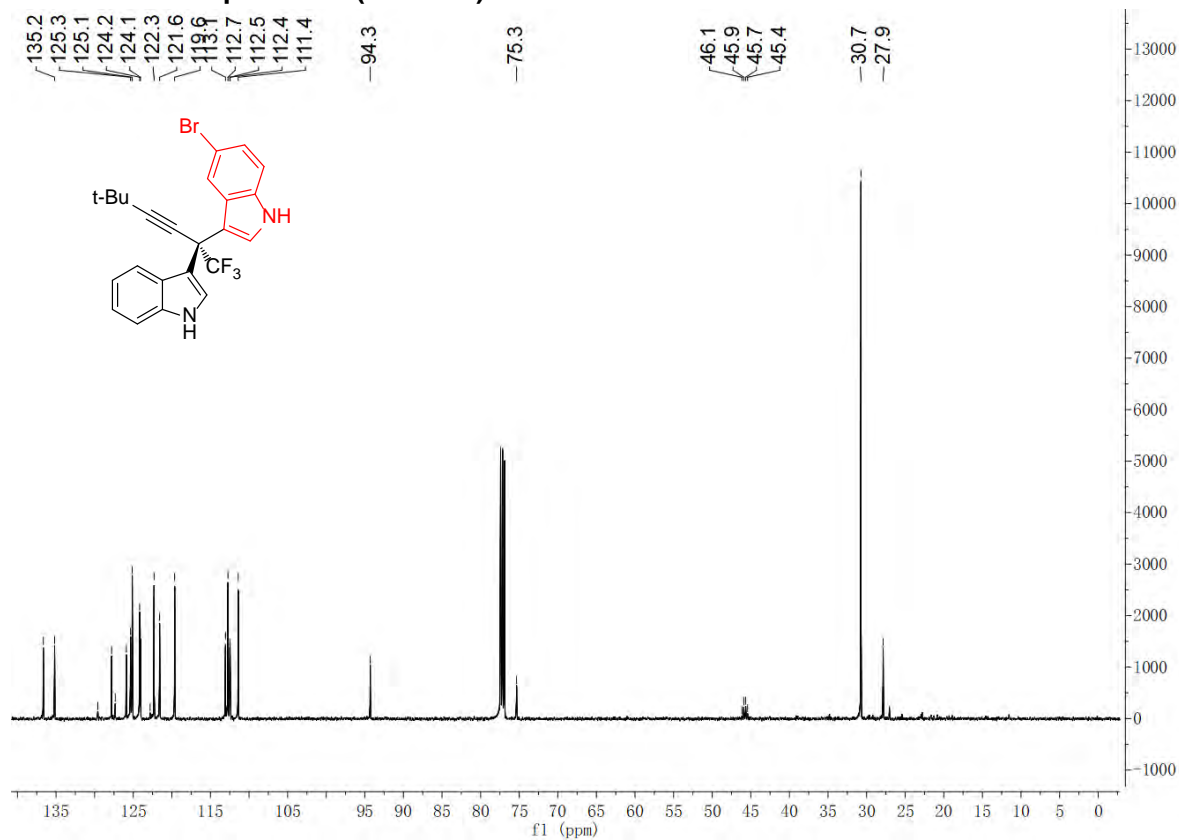

**<sup>19</sup>F NMR of compound 5c (in CDCl<sub>3</sub>)**

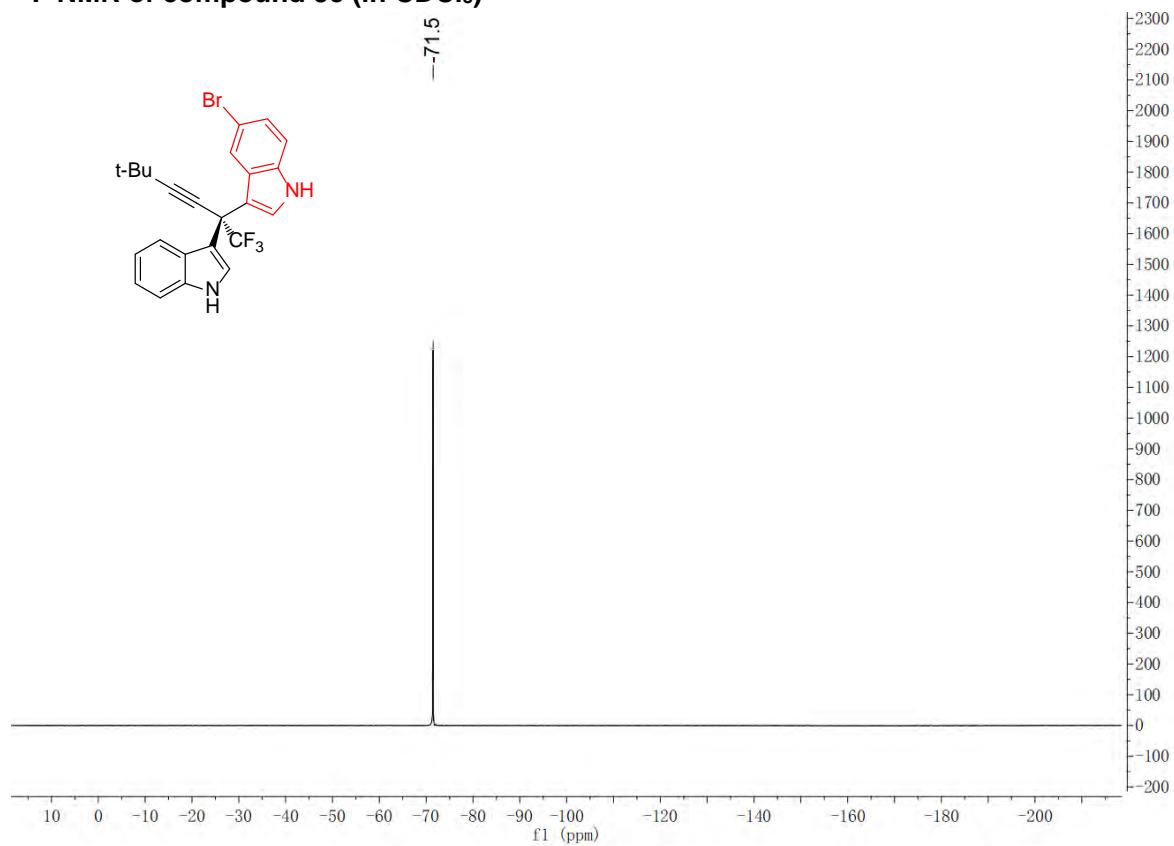

**<sup>1</sup>H NMR of compound 5d (in CDCl<sub>3</sub>)**

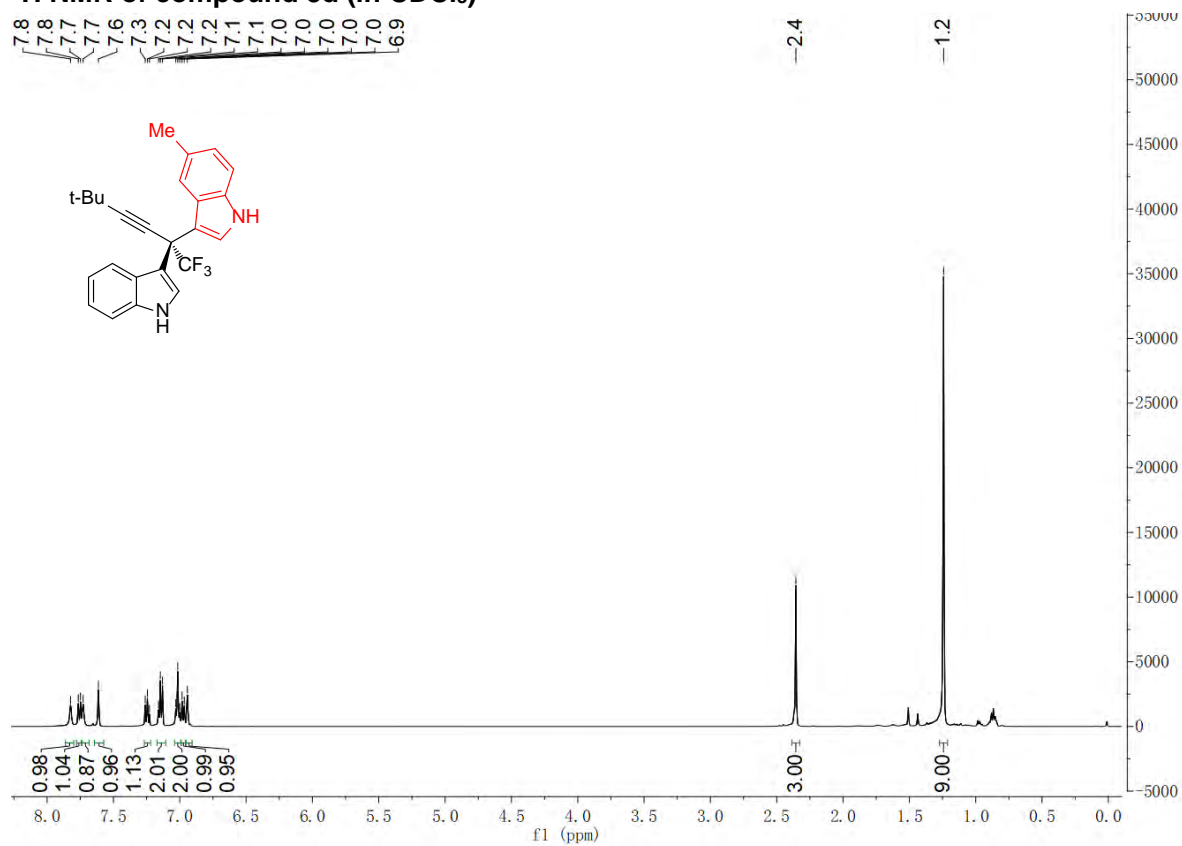

### <sup>13</sup>C NMR of compound 5d (in CDCl<sub>3</sub>)

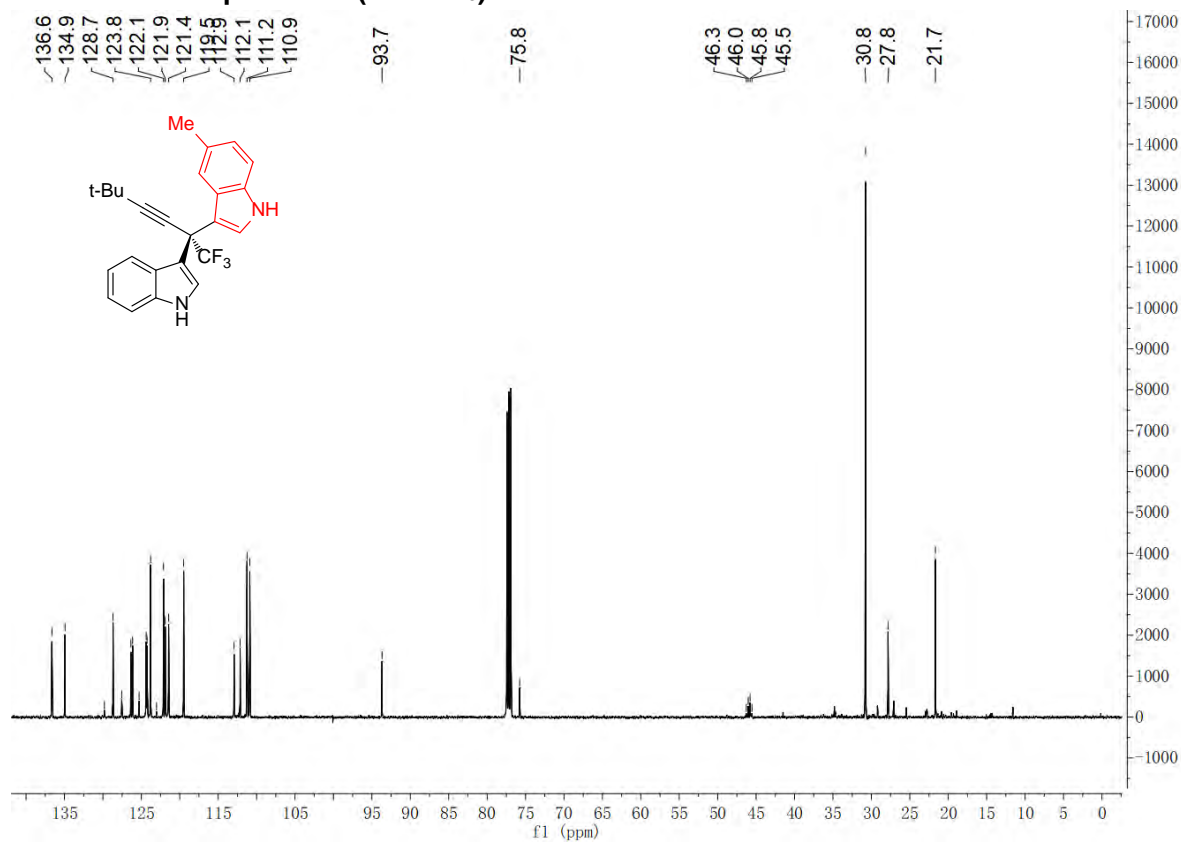

### <sup>19</sup>F NMR of compound 5d (in CDCl<sub>3</sub>)

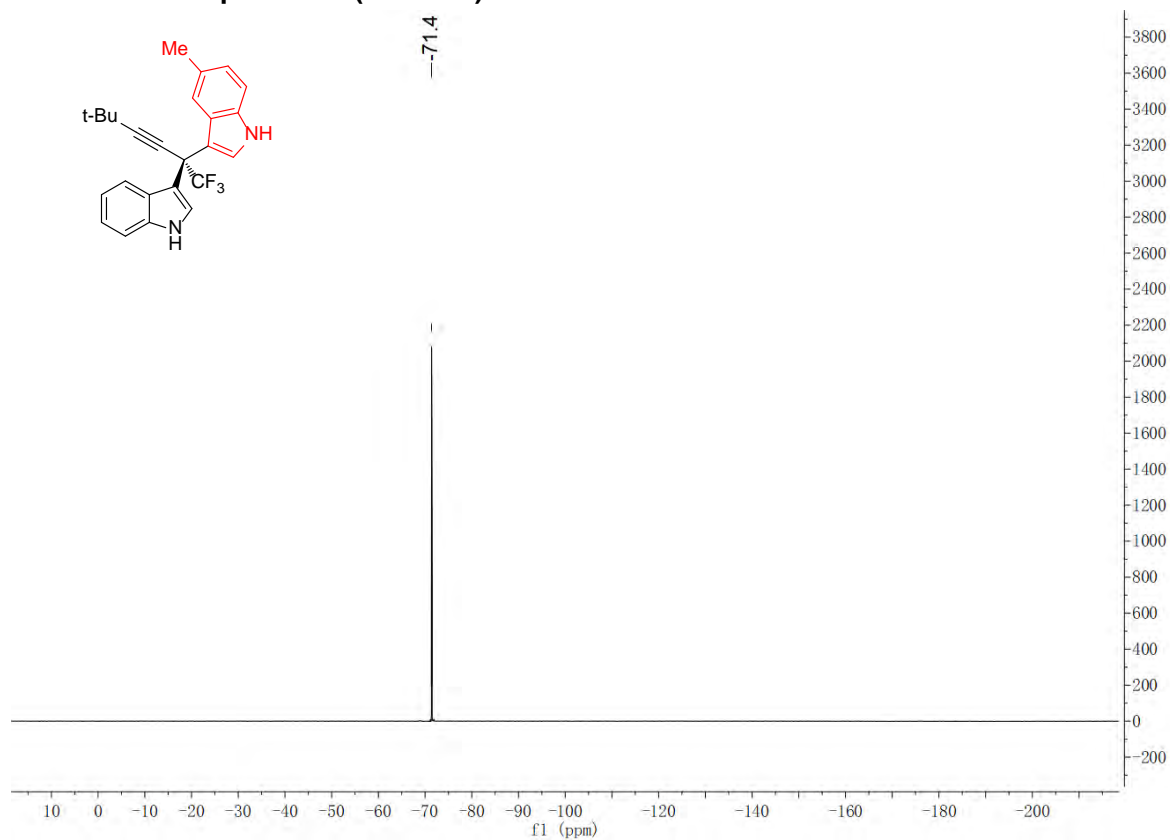

**<sup>1</sup>H NMR of compound 5e (in CDCl<sub>3</sub>)**

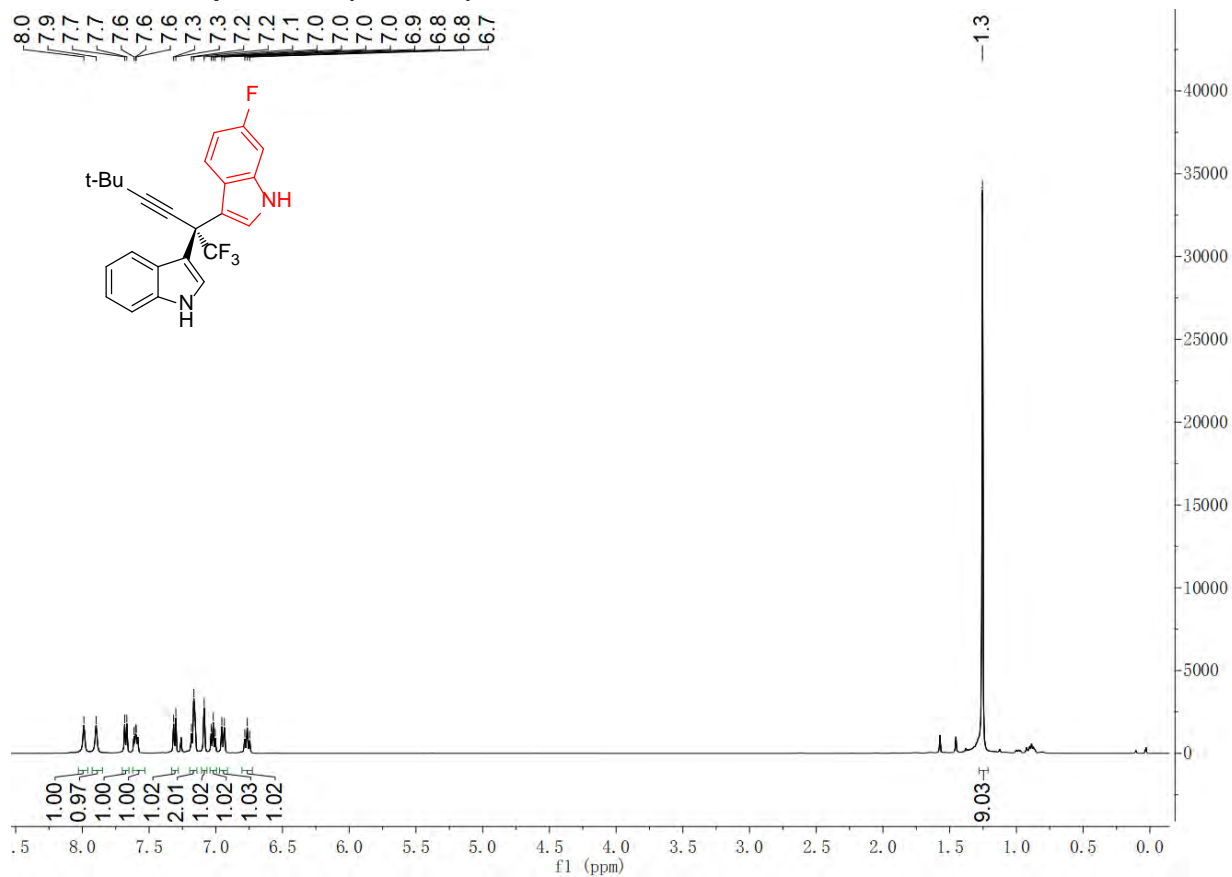

**<sup>13</sup>C NMR of compound 5e (in CDCl<sub>3</sub>)**

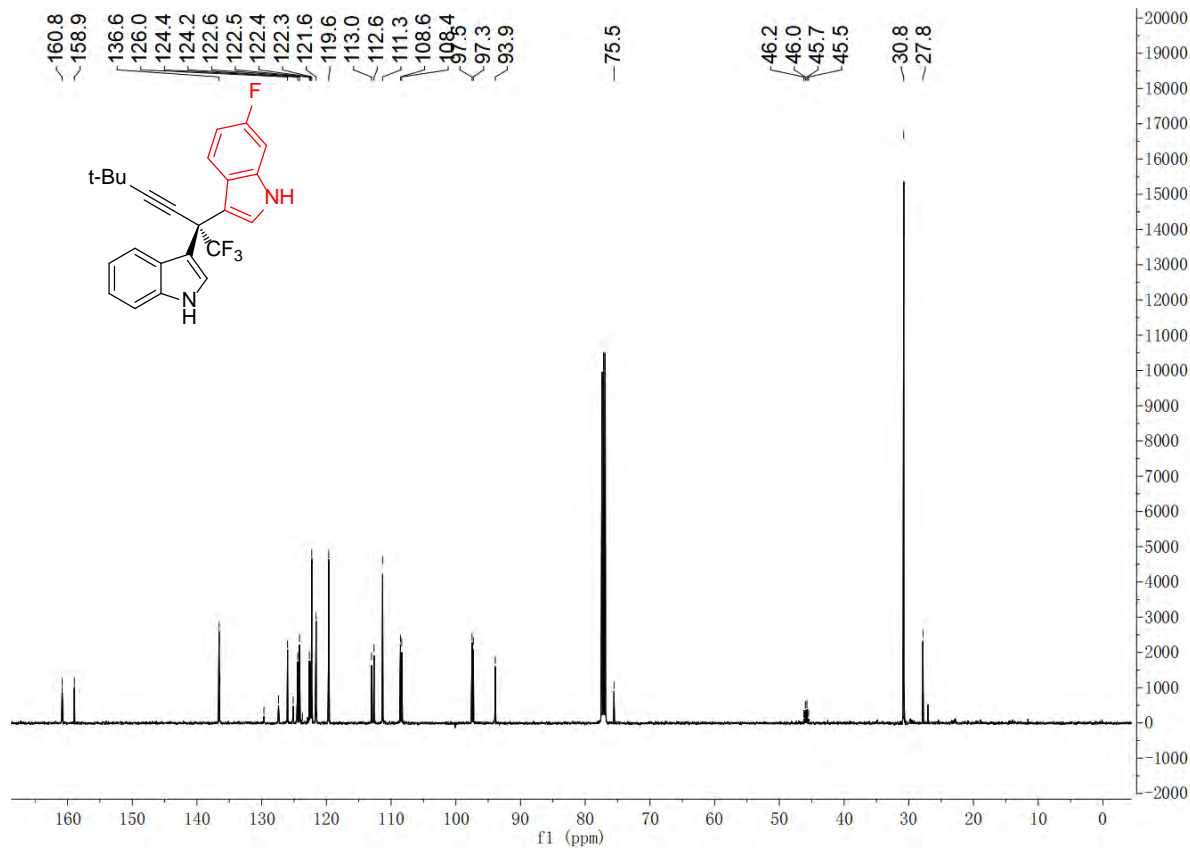

**<sup>19</sup>F NMR of compound 5e (in CDCl<sub>3</sub>)**

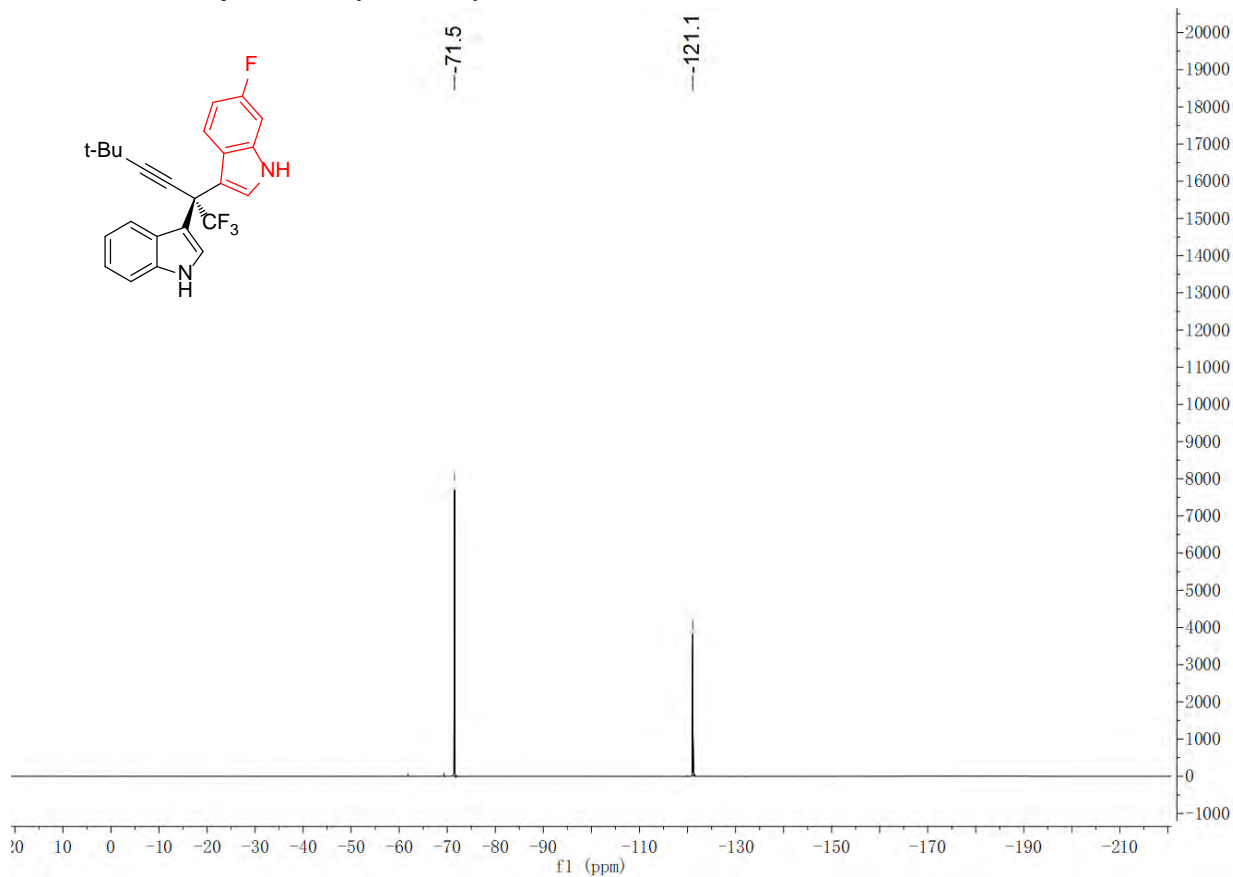

**<sup>1</sup>H NMR of compound 5f (in CDCl<sub>3</sub>)**

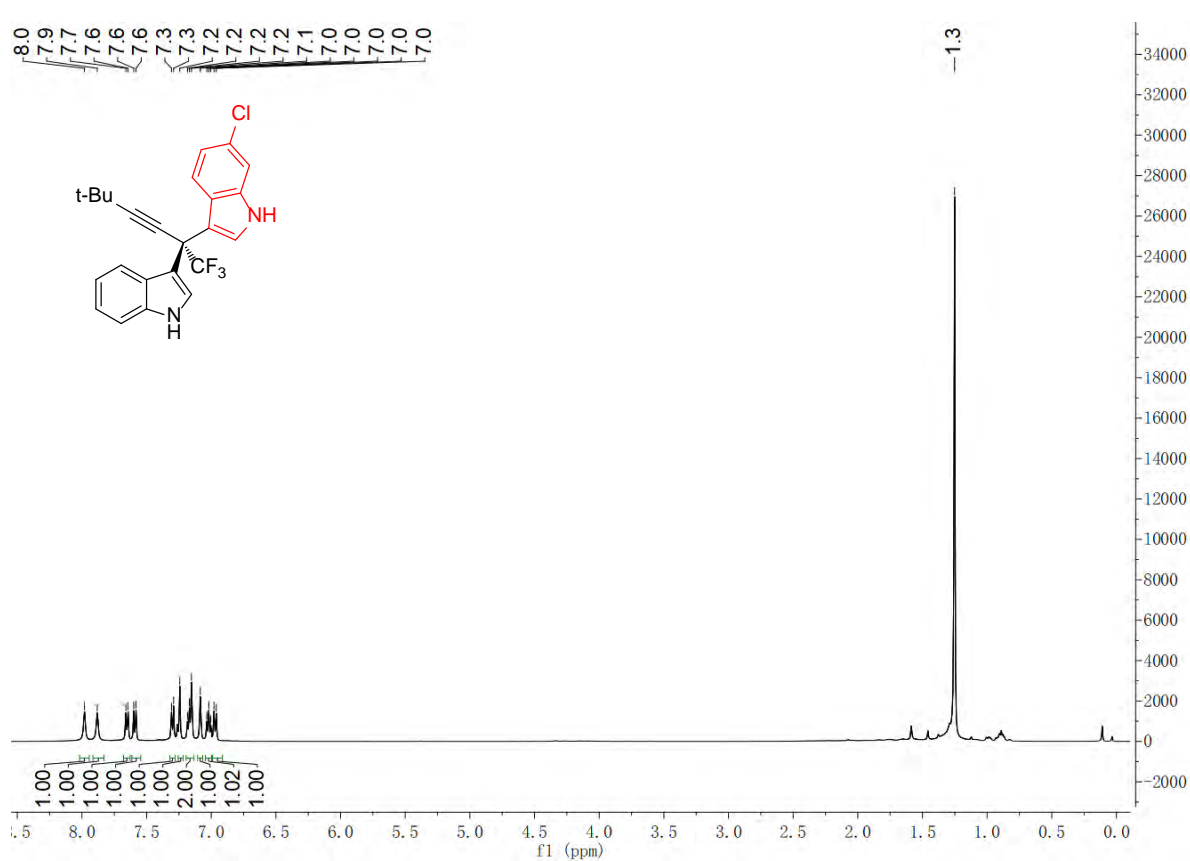

**<sup>13</sup>C NMR of compound 5f (in CDCl<sub>3</sub>)**

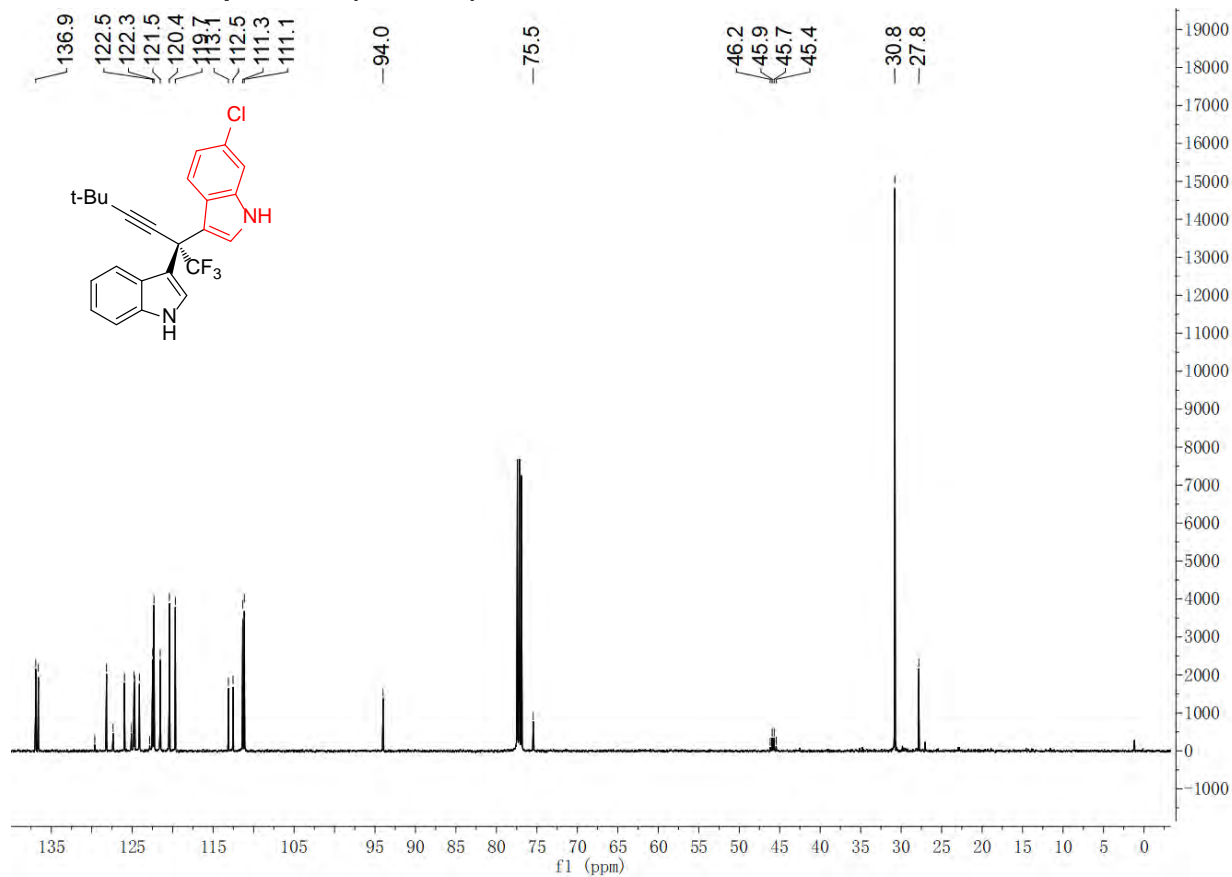

**<sup>19</sup>F NMR of compound 5f (in CDCl<sub>3</sub>)**

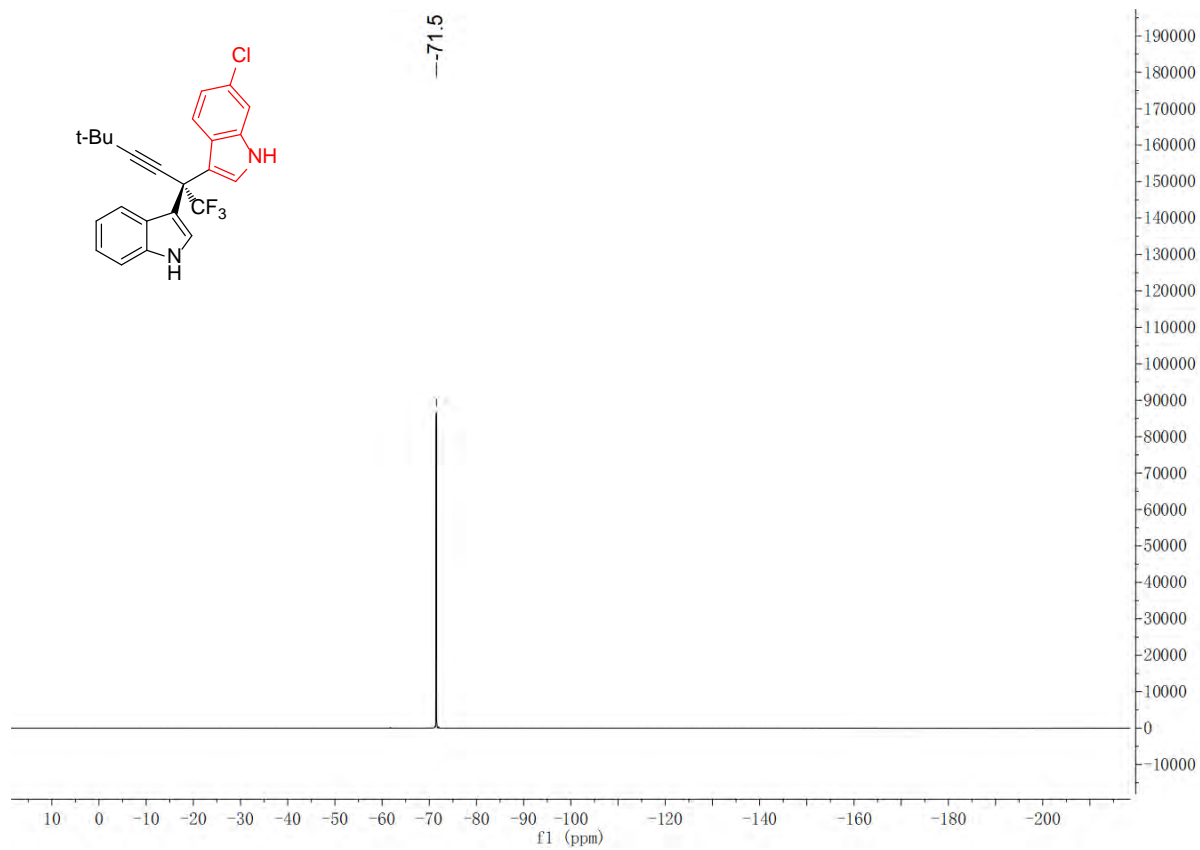

### <sup>1</sup>H NMR of compound 5g (in CDCl<sub>3</sub>)

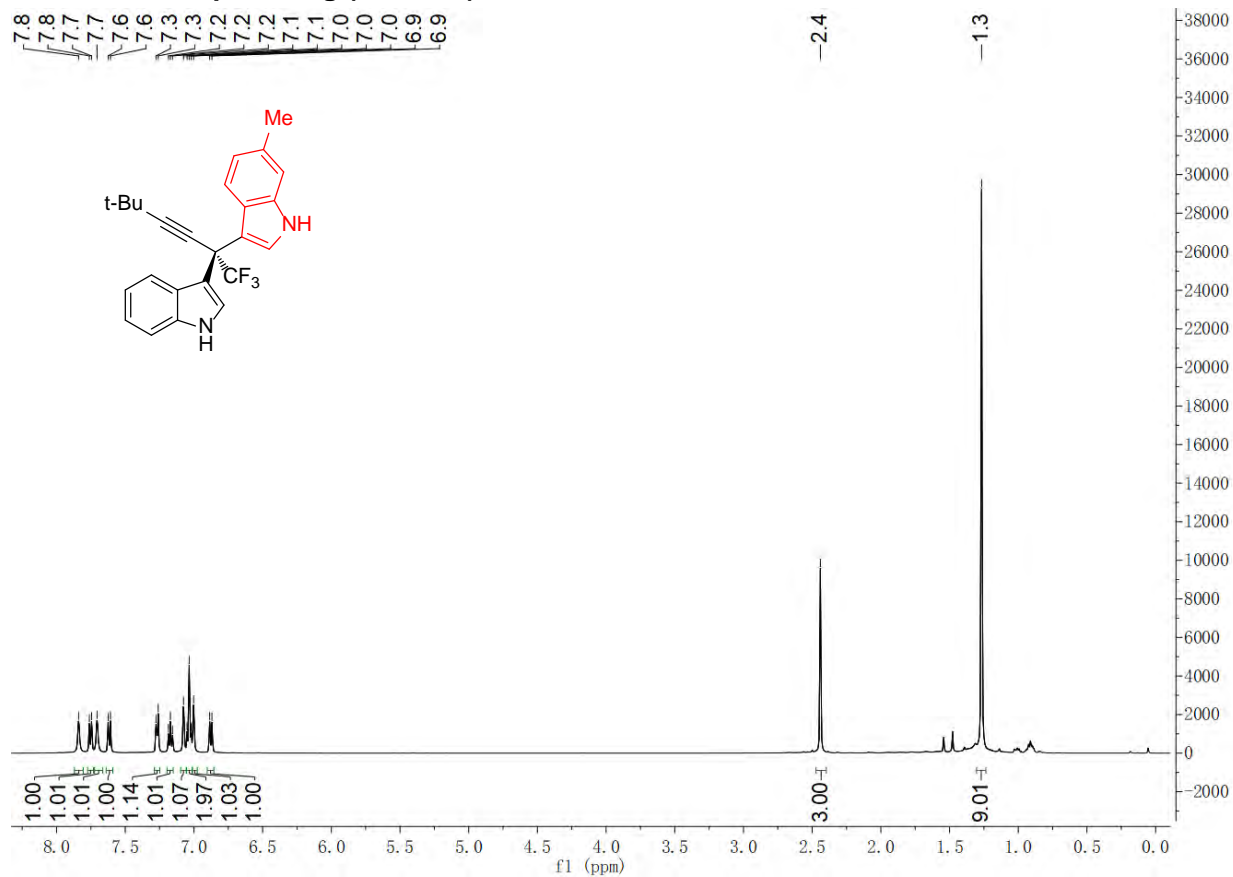

### <sup>13</sup>C NMR of compound 5g (in CDCl<sub>3</sub>)

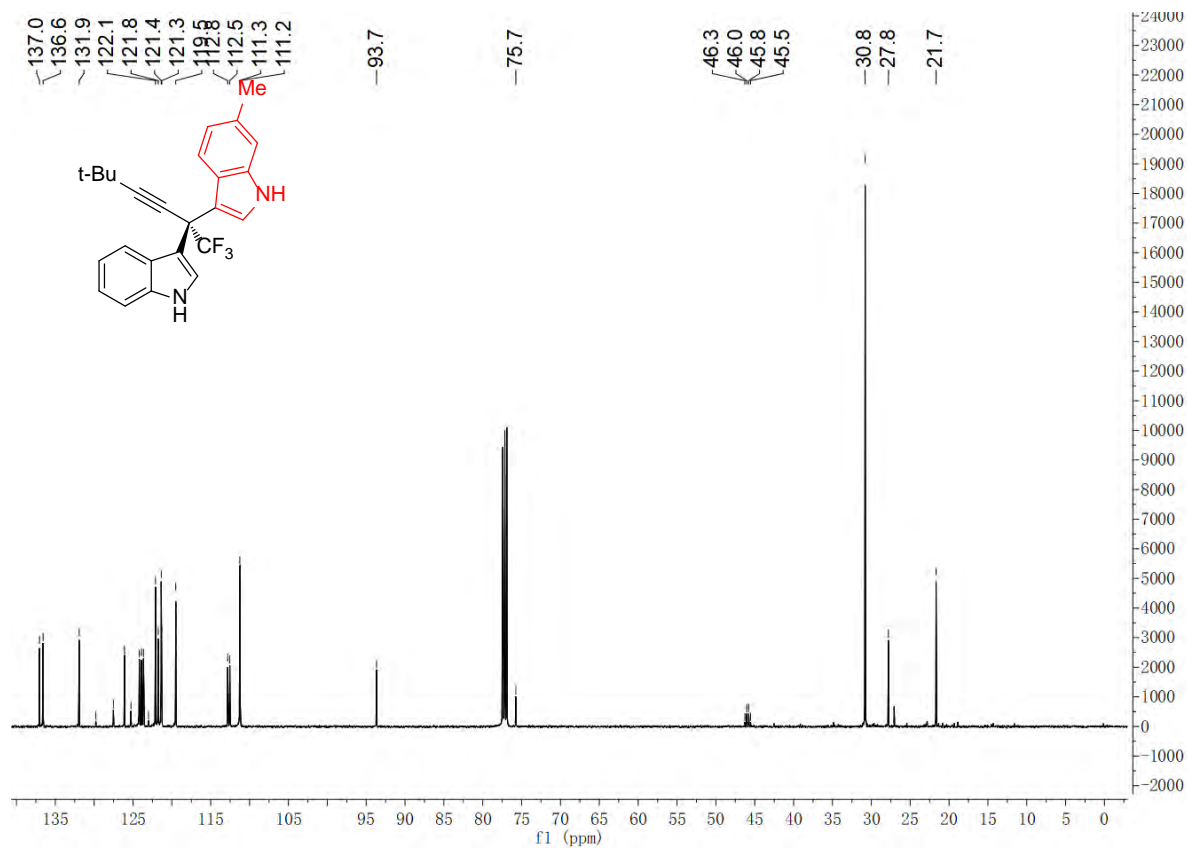

**<sup>19</sup>F NMR of compound 5g (in CDCl<sub>3</sub>)**

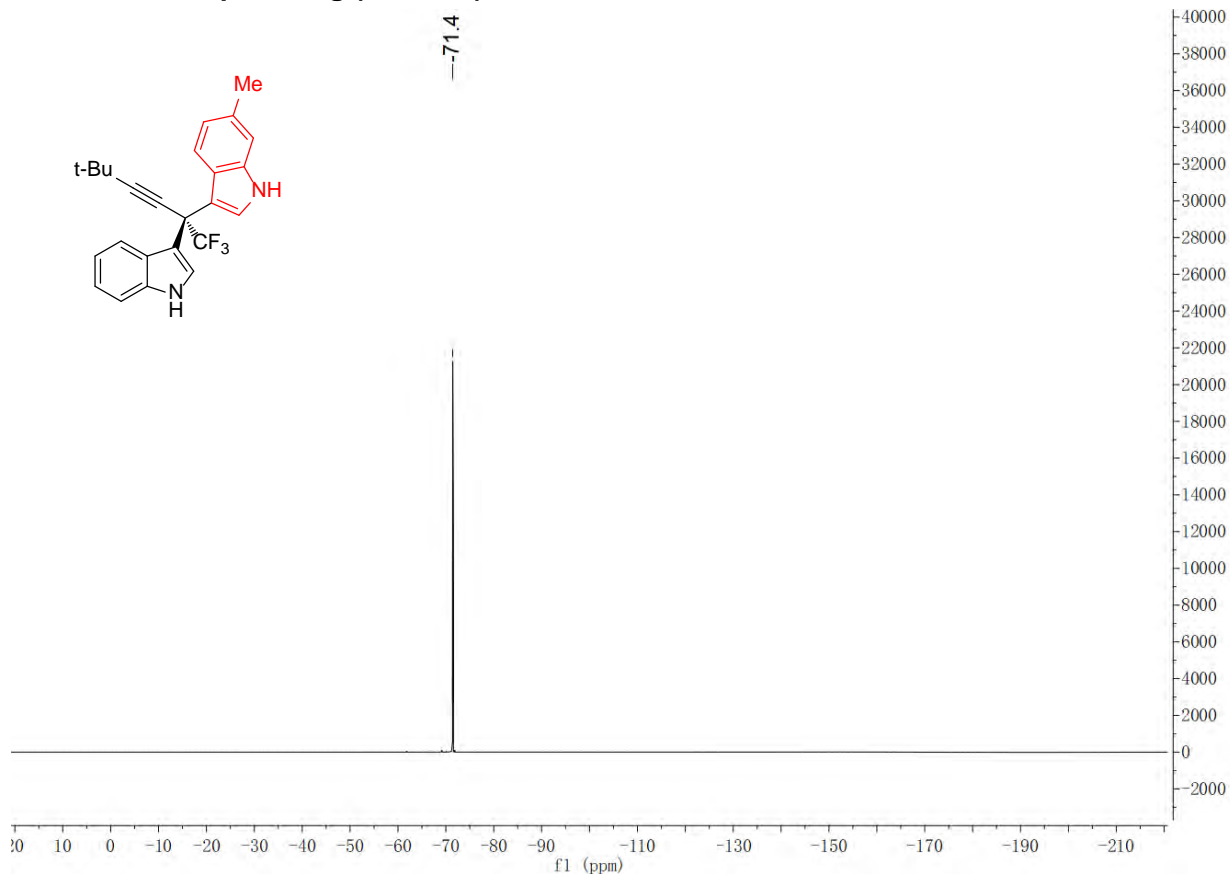

**<sup>1</sup>H NMR of compound 5h (in CDCl<sub>3</sub>)**

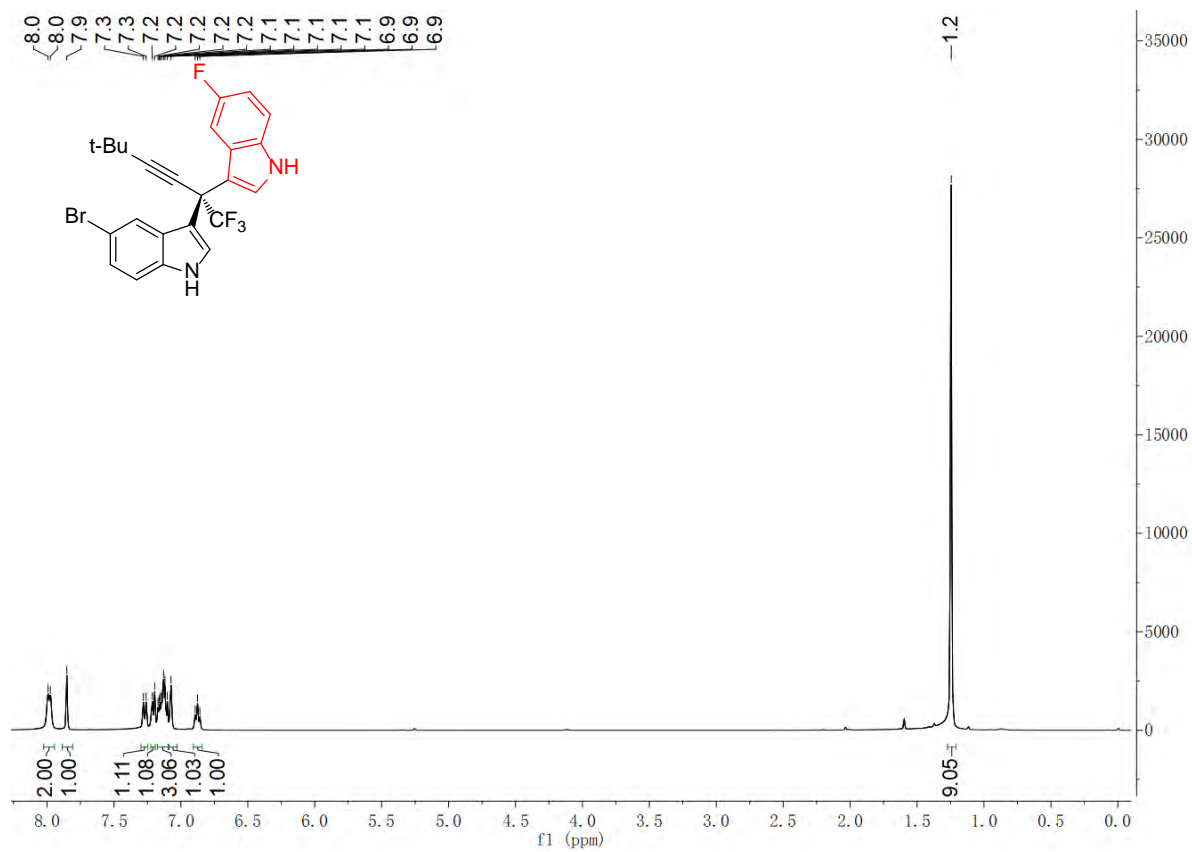



### <sup>13</sup>C NMR of compound 5h (in CDCl<sub>3</sub>)

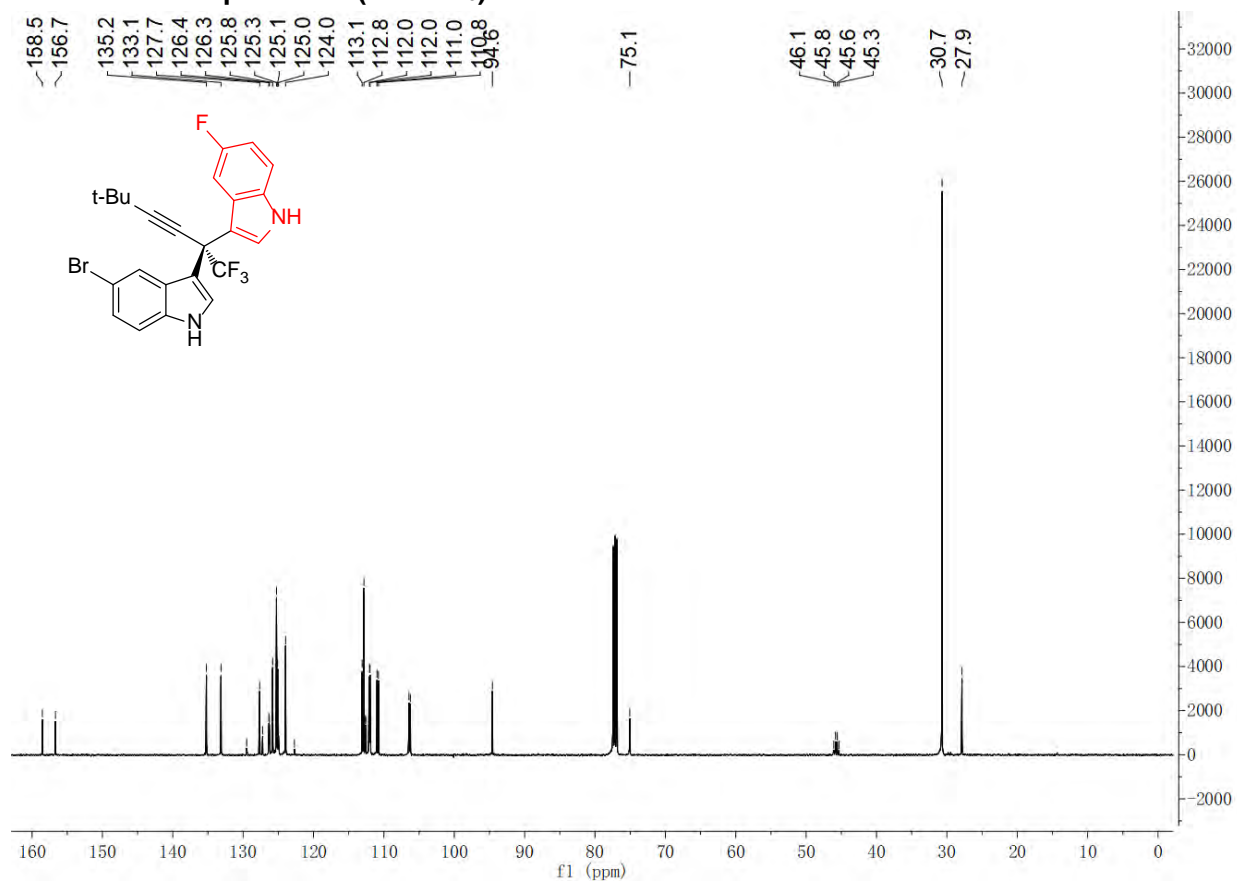

### <sup>19</sup>F NMR of compound 5h (in CDCl<sub>3</sub>)

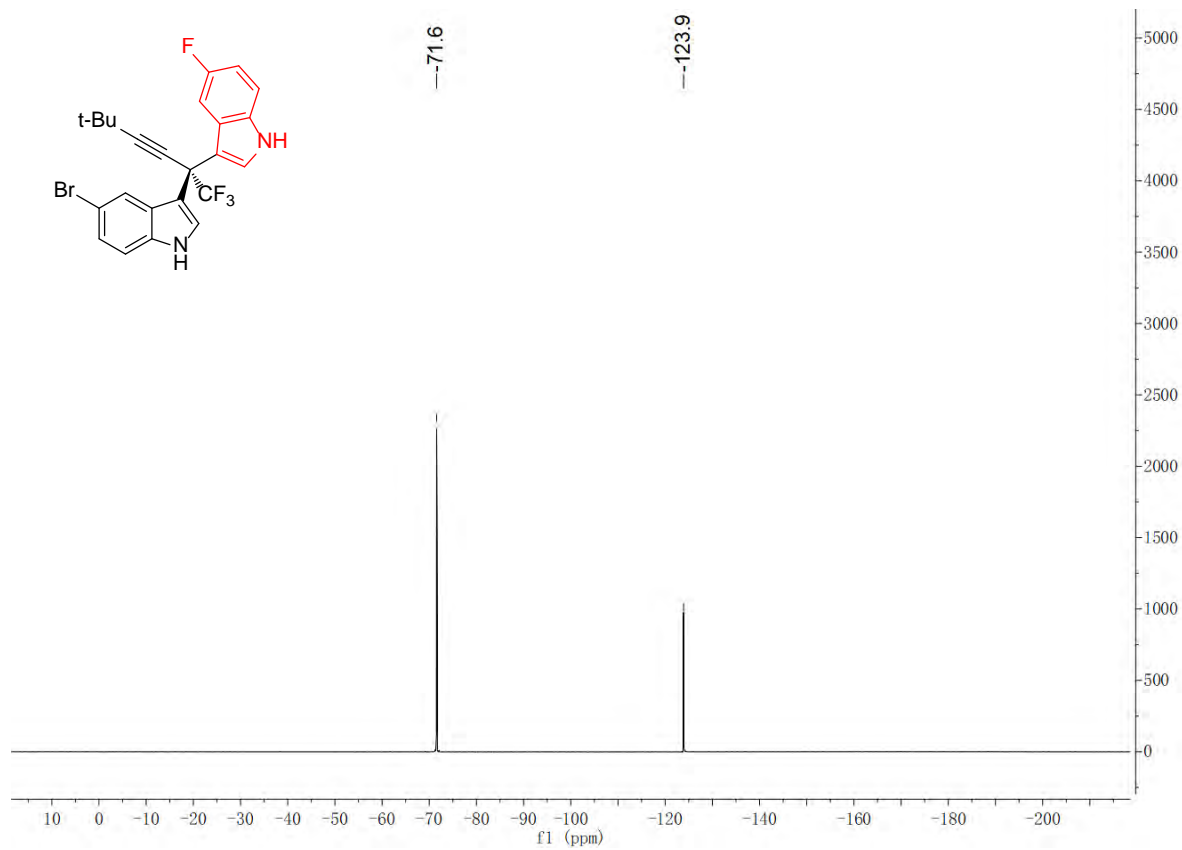

### <sup>1</sup>H NMR of compound 5i (in CDCl<sub>3</sub>)

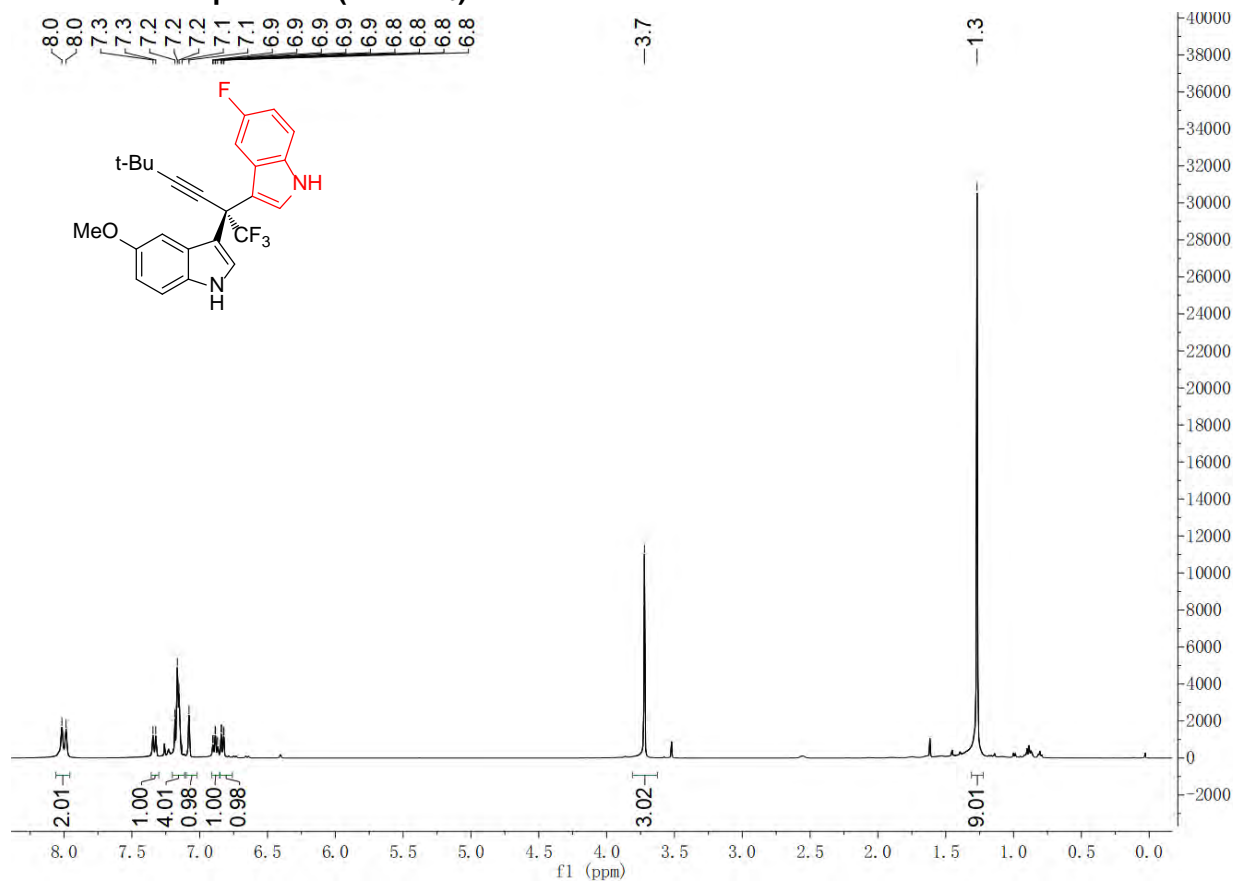

### <sup>13</sup>C NMR of compound 5i (in CDCl<sub>3</sub>)

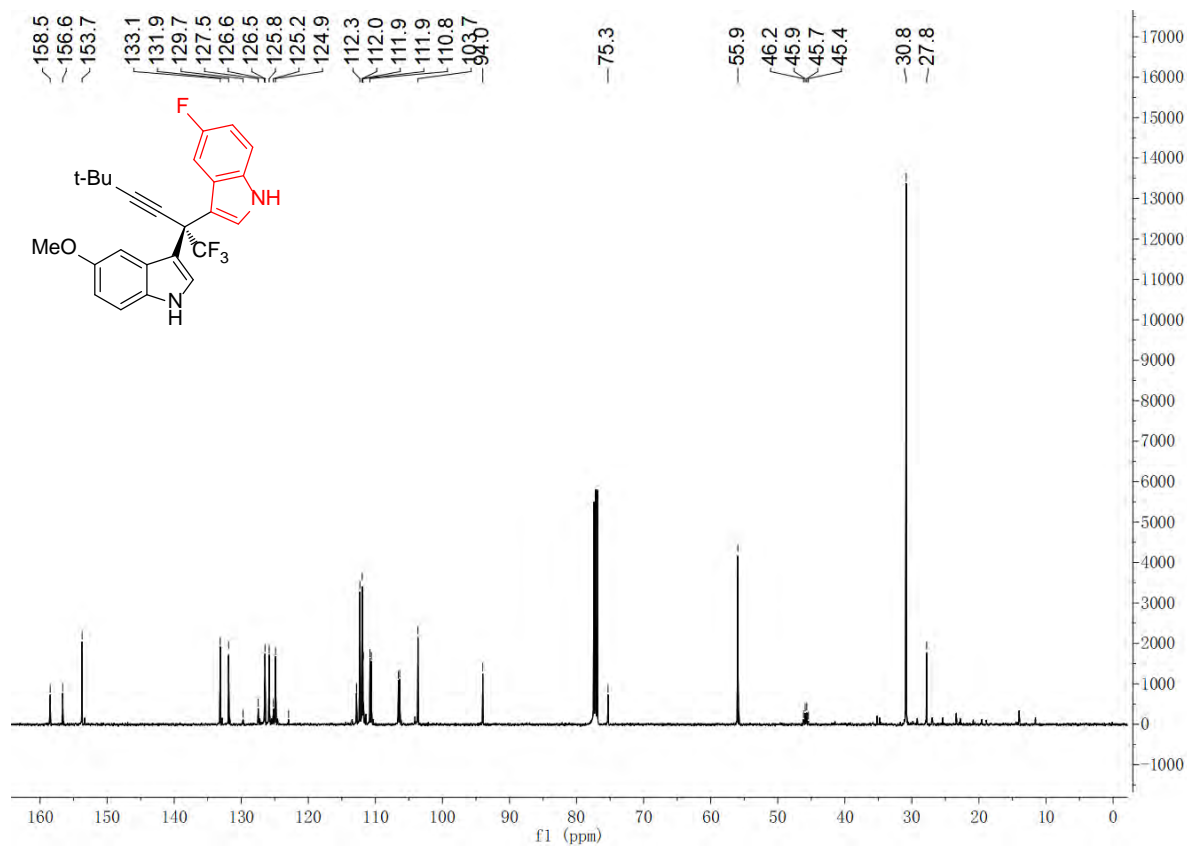

**<sup>19</sup>F NMR of compound 5i (in CDCl<sub>3</sub>)**

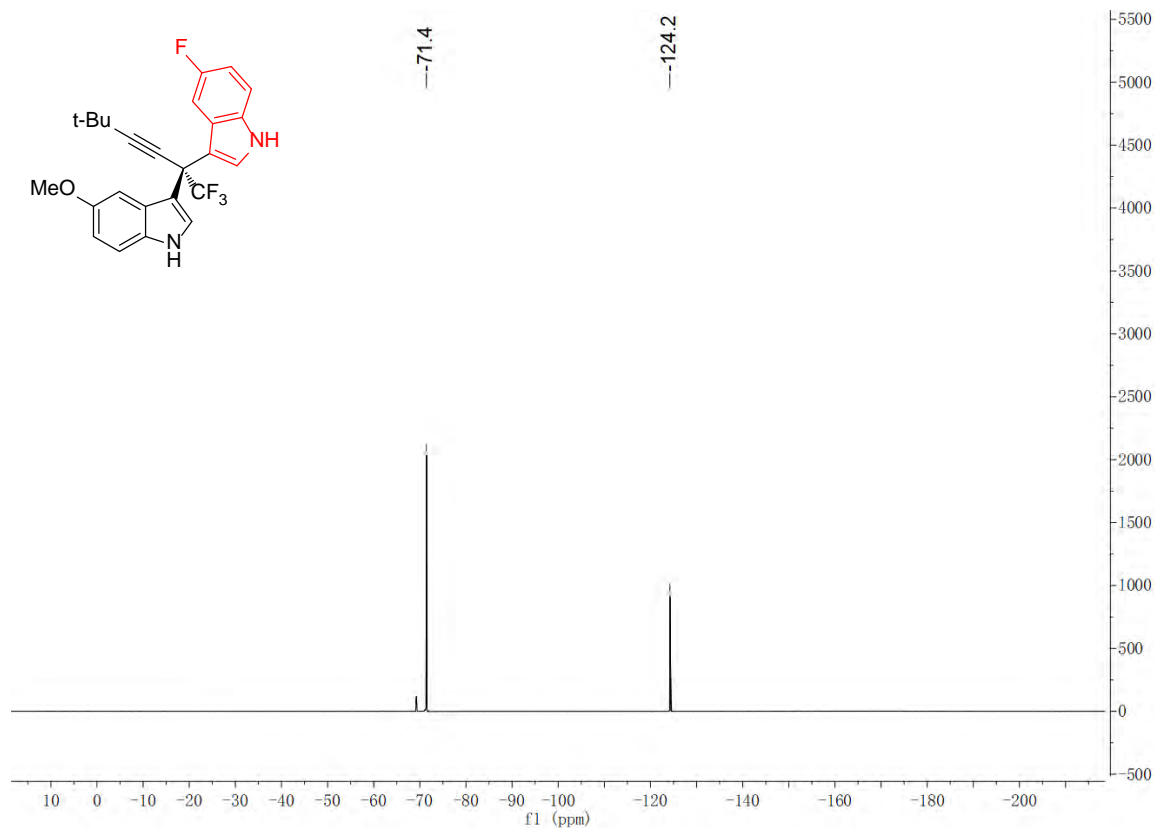

**<sup>1</sup>H NMR of compound 5j (in CDCl<sub>3</sub>)**

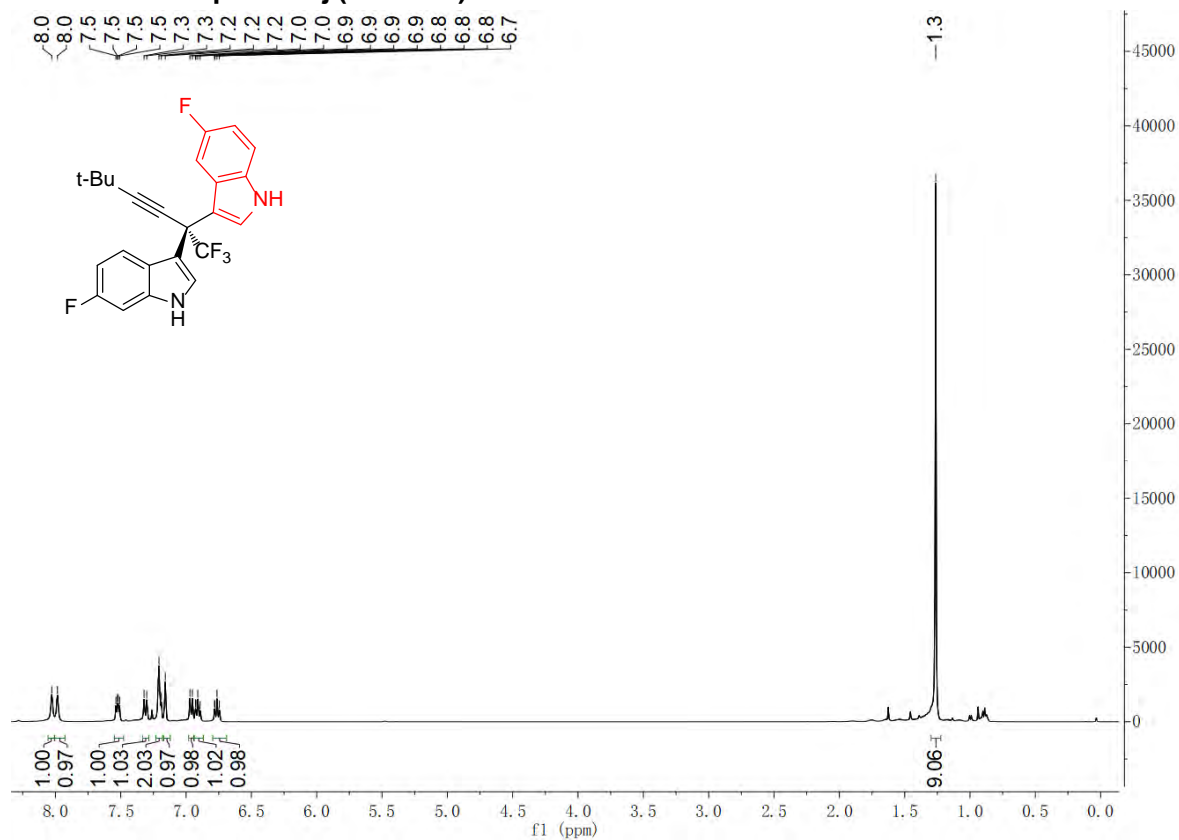

### <sup>13</sup>C NMR of compound 5j (in CDCl<sub>3</sub>)

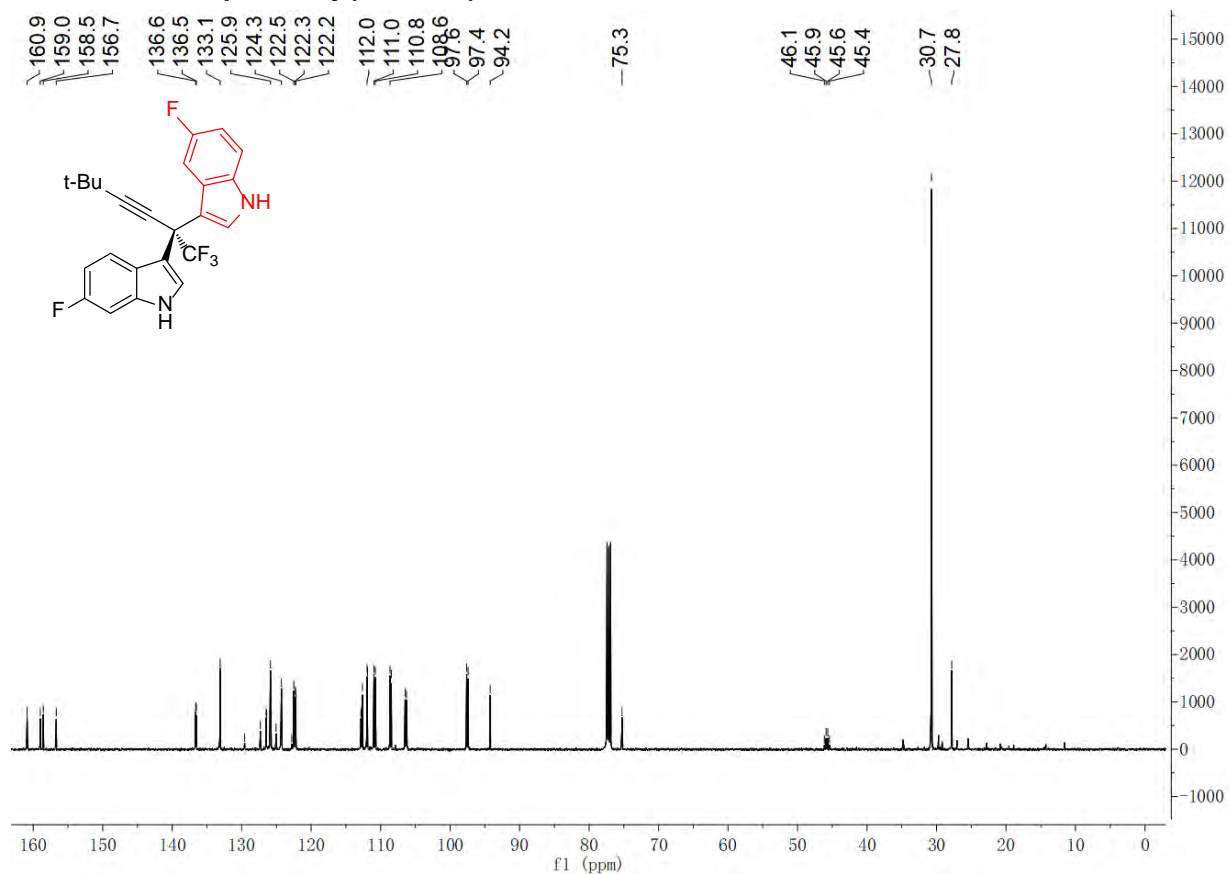

### <sup>19</sup>F NMR of compound 5j (in CDCl<sub>3</sub>)

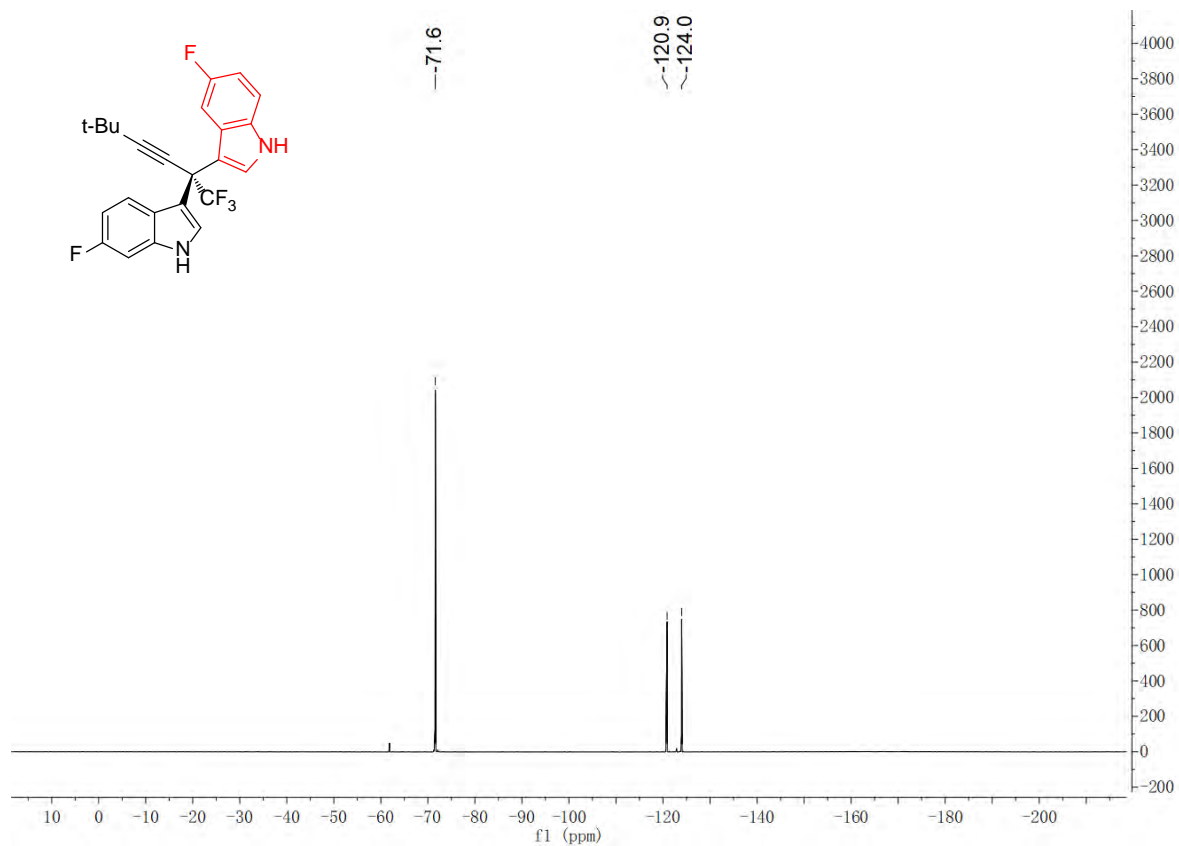

**<sup>1</sup>H NMR of compound 5k (in CDCl<sub>3</sub>)**

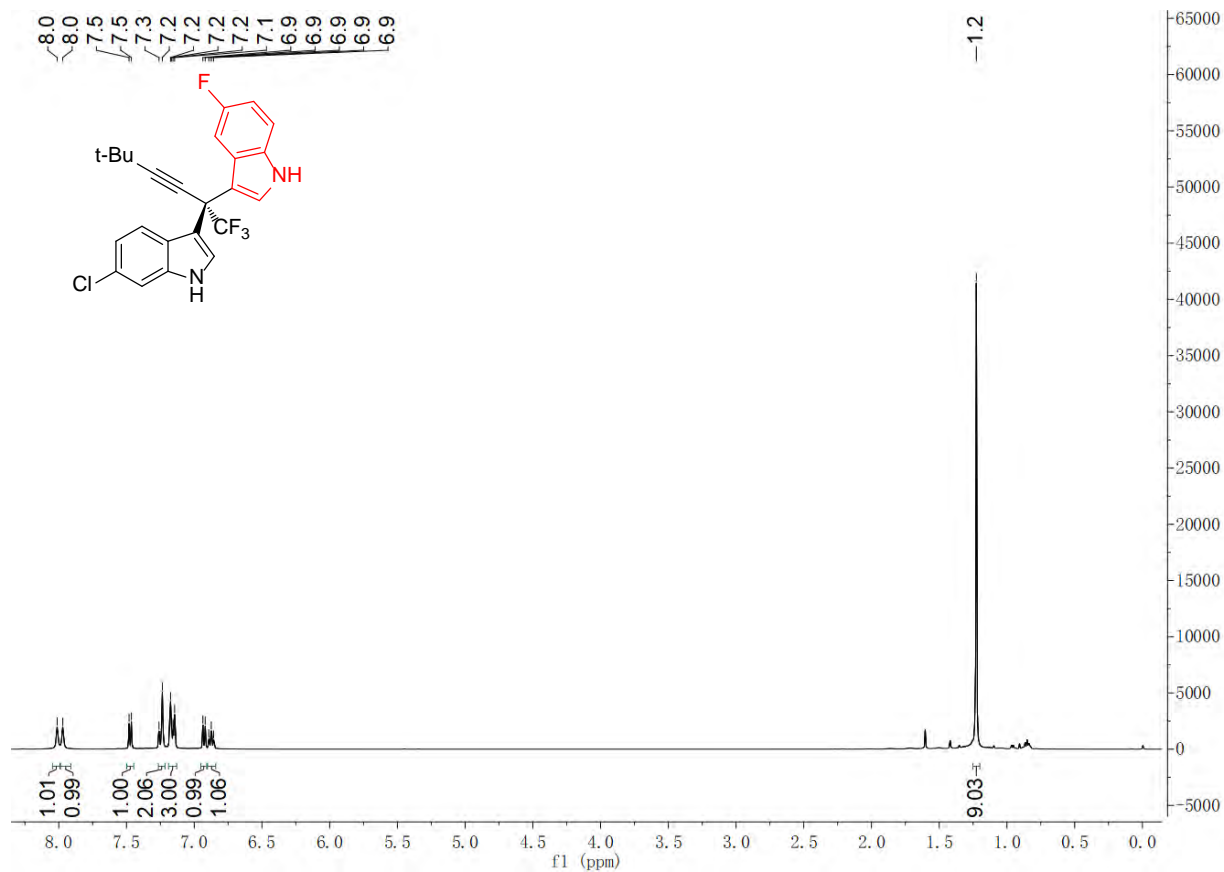

**<sup>13</sup>C NMR of compound 5k (in CDCl<sub>3</sub>)**

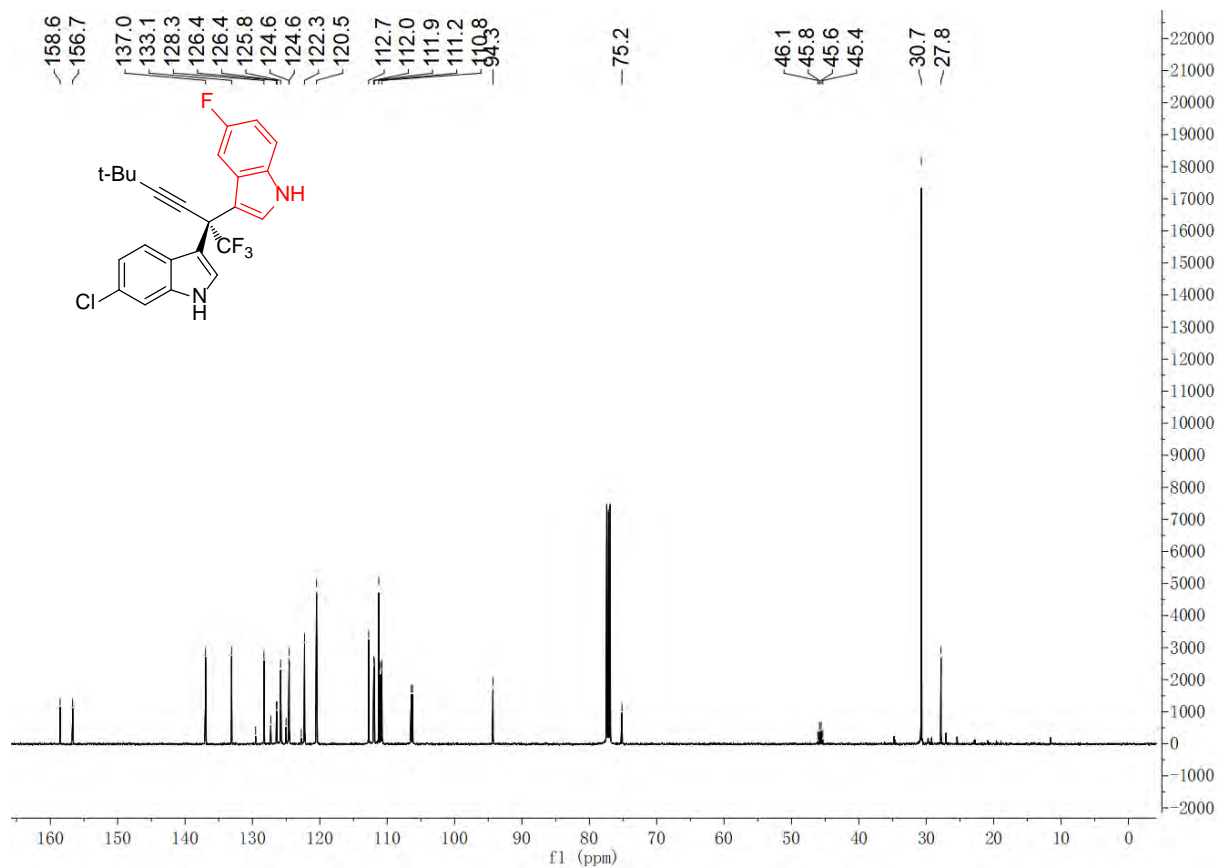

**<sup>19</sup>F NMR of compound 5k (in CDCl<sub>3</sub>)**

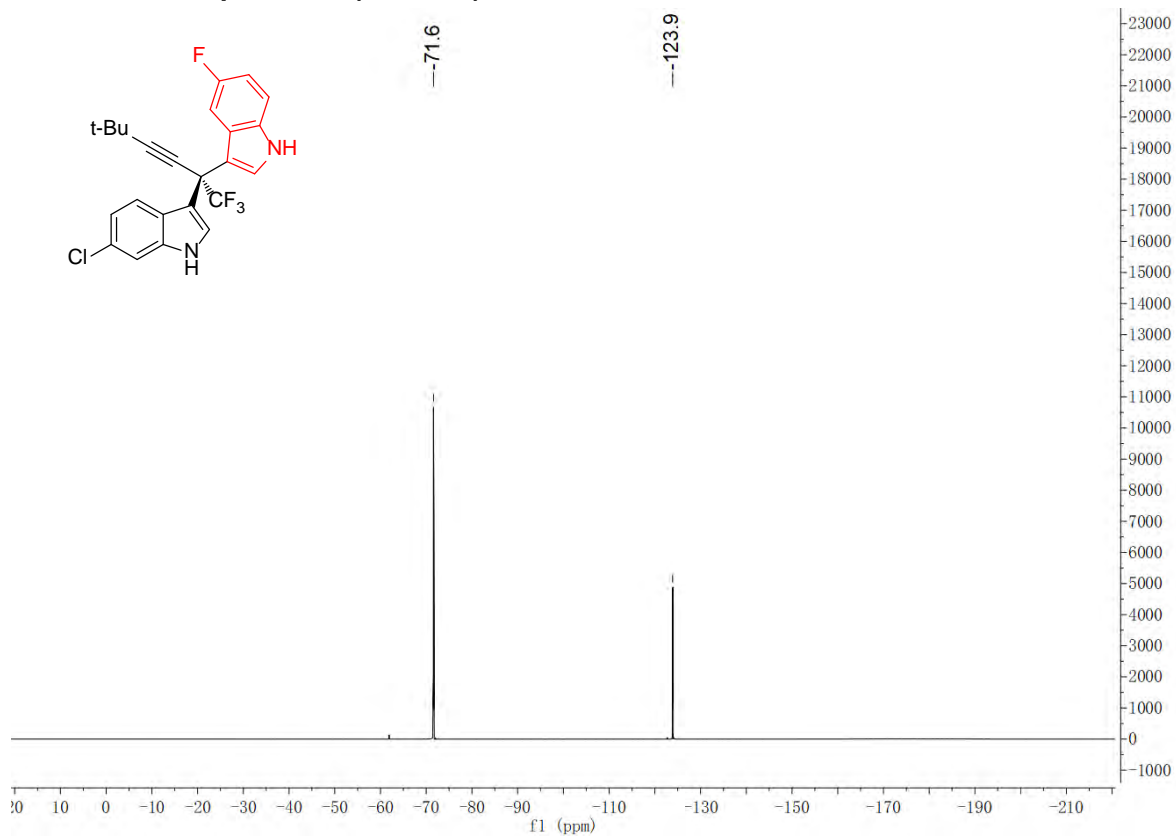

**<sup>1</sup>H NMR of compound 5l (in CDCl<sub>3</sub>)**

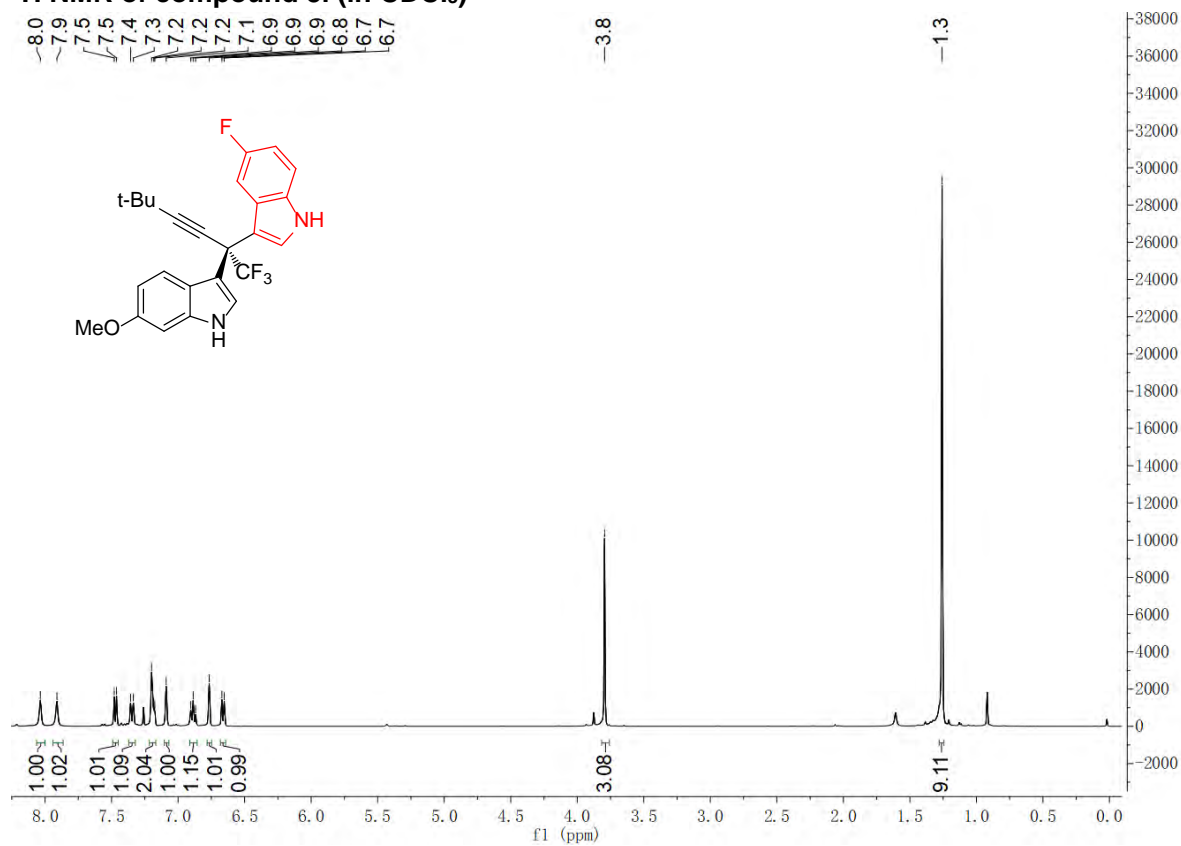

### <sup>13</sup>C NMR of compound 5I (in CDCl<sub>3</sub>)

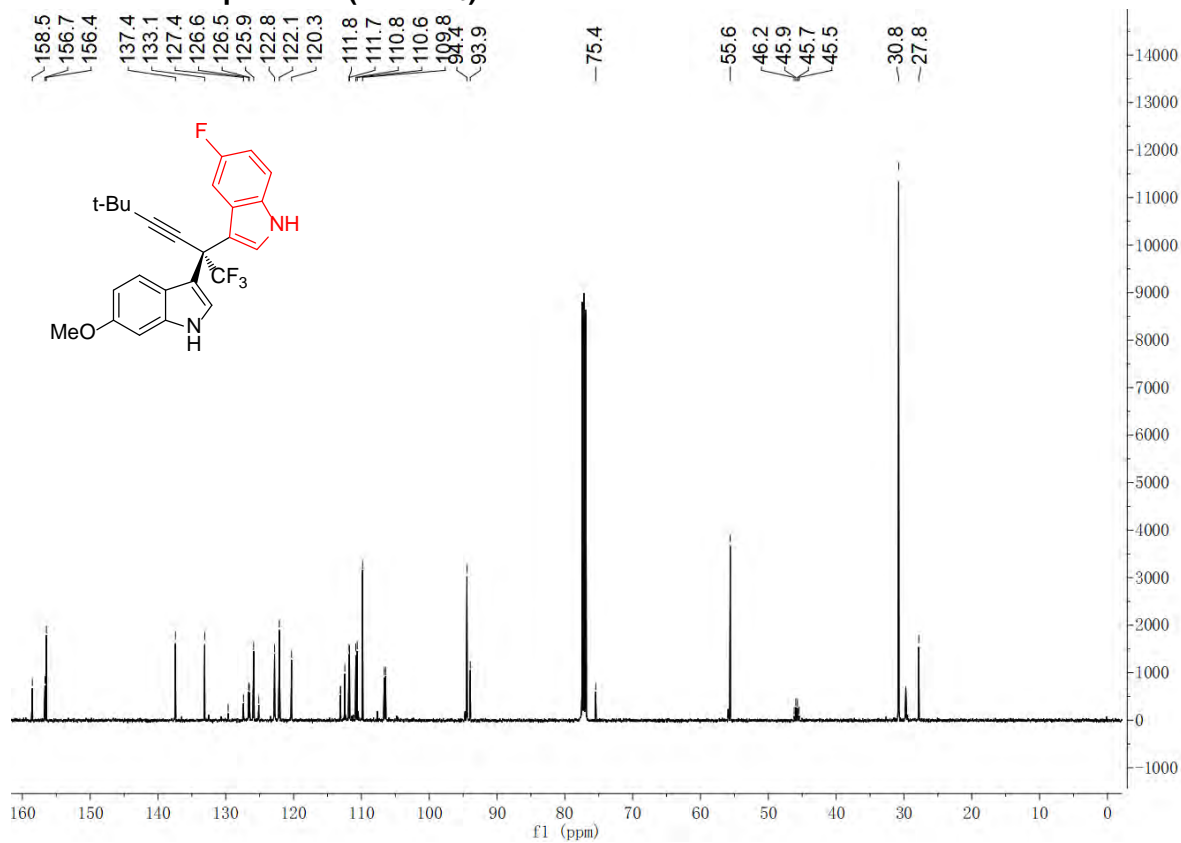

### <sup>19</sup>F NMR of compound 5I (in CDCl<sub>3</sub>)

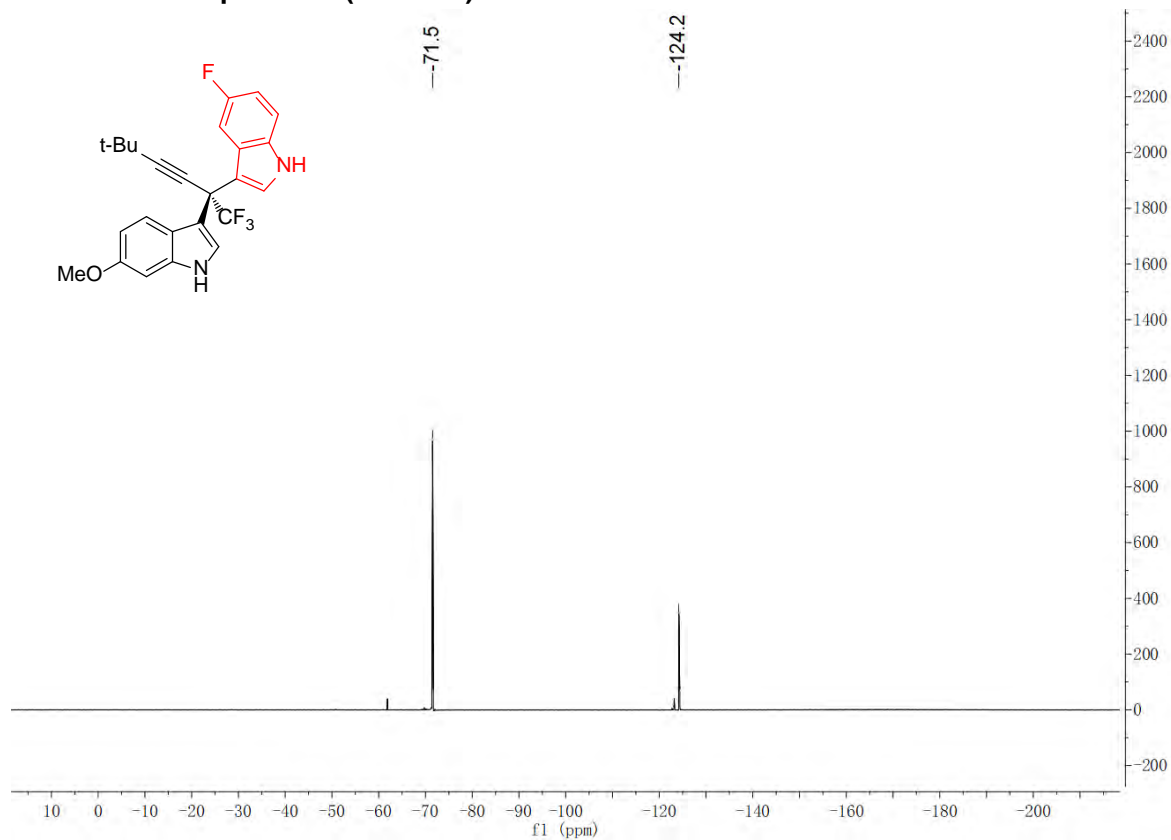

### <sup>1</sup>H NMR of compound 5m (in CDCl<sub>3</sub>)

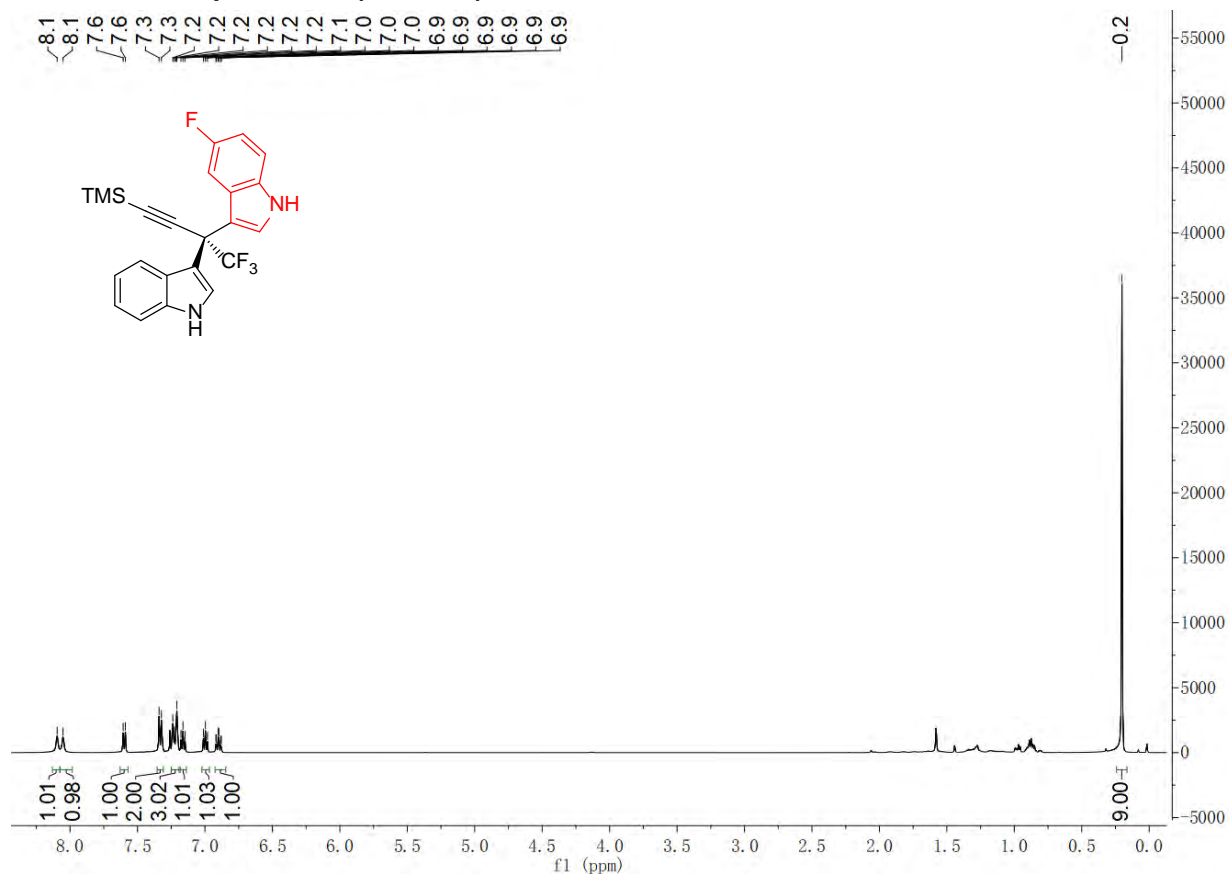

### <sup>13</sup>C NMR of compound 5m (in CDCl<sub>3</sub>)

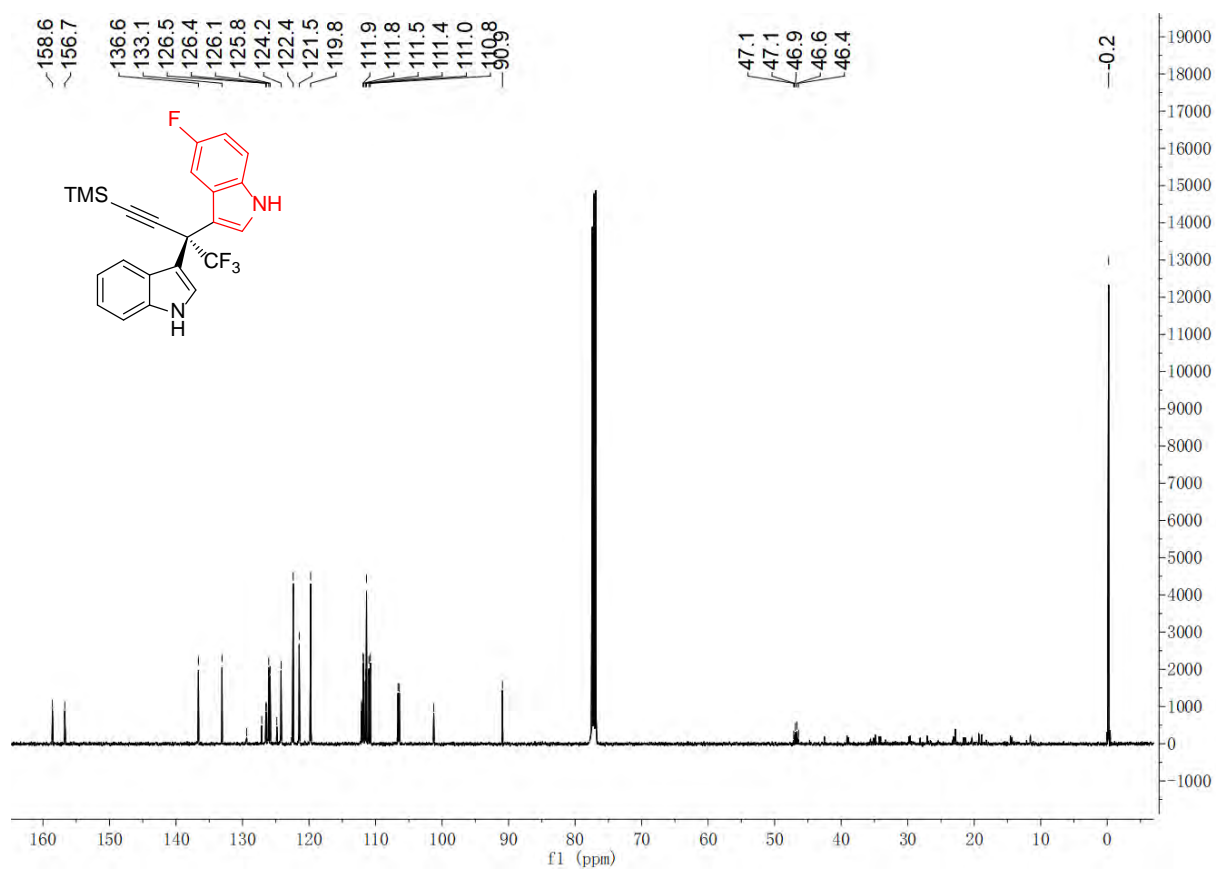



**<sup>19</sup>F NMR of compound 5m (in CDCl<sub>3</sub>)**

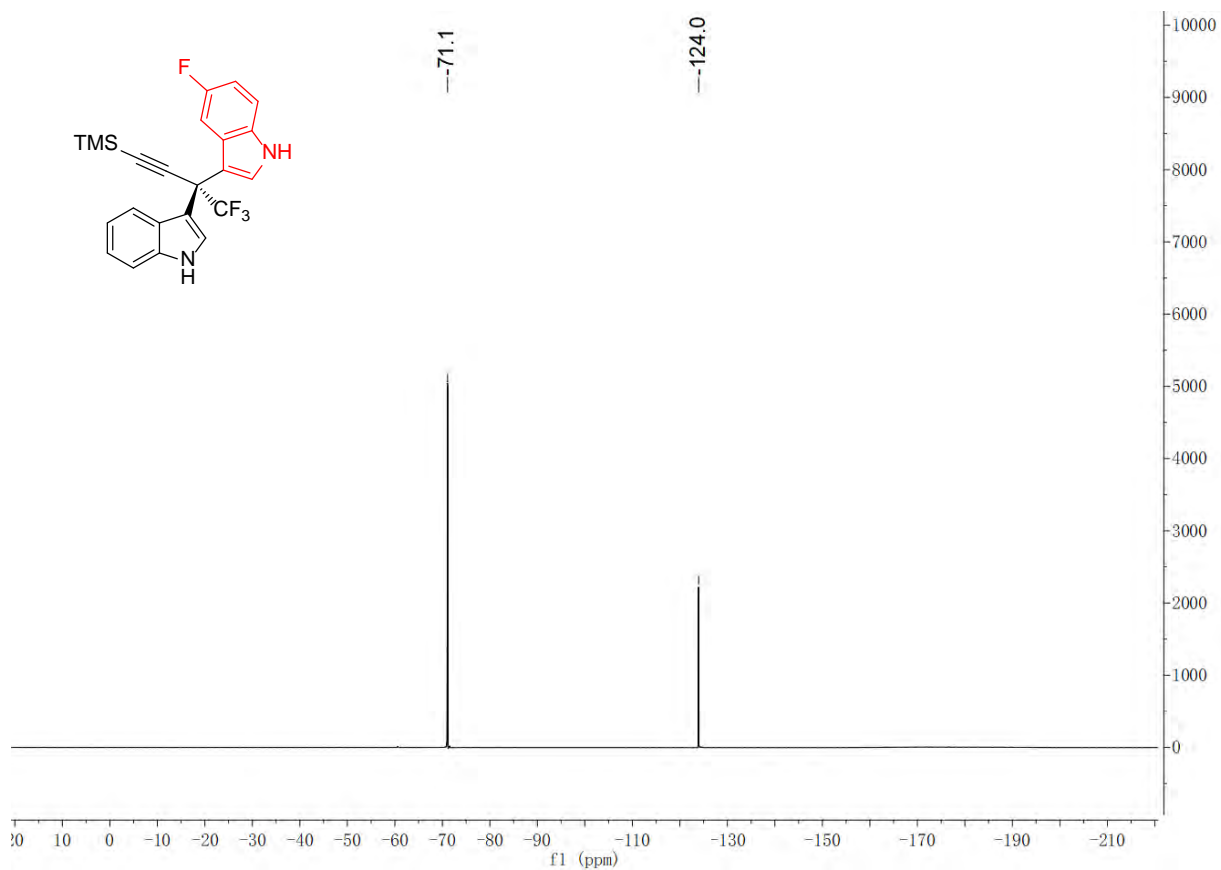

**<sup>1</sup>H NMR of compound 5n (in CDCl<sub>3</sub>)**

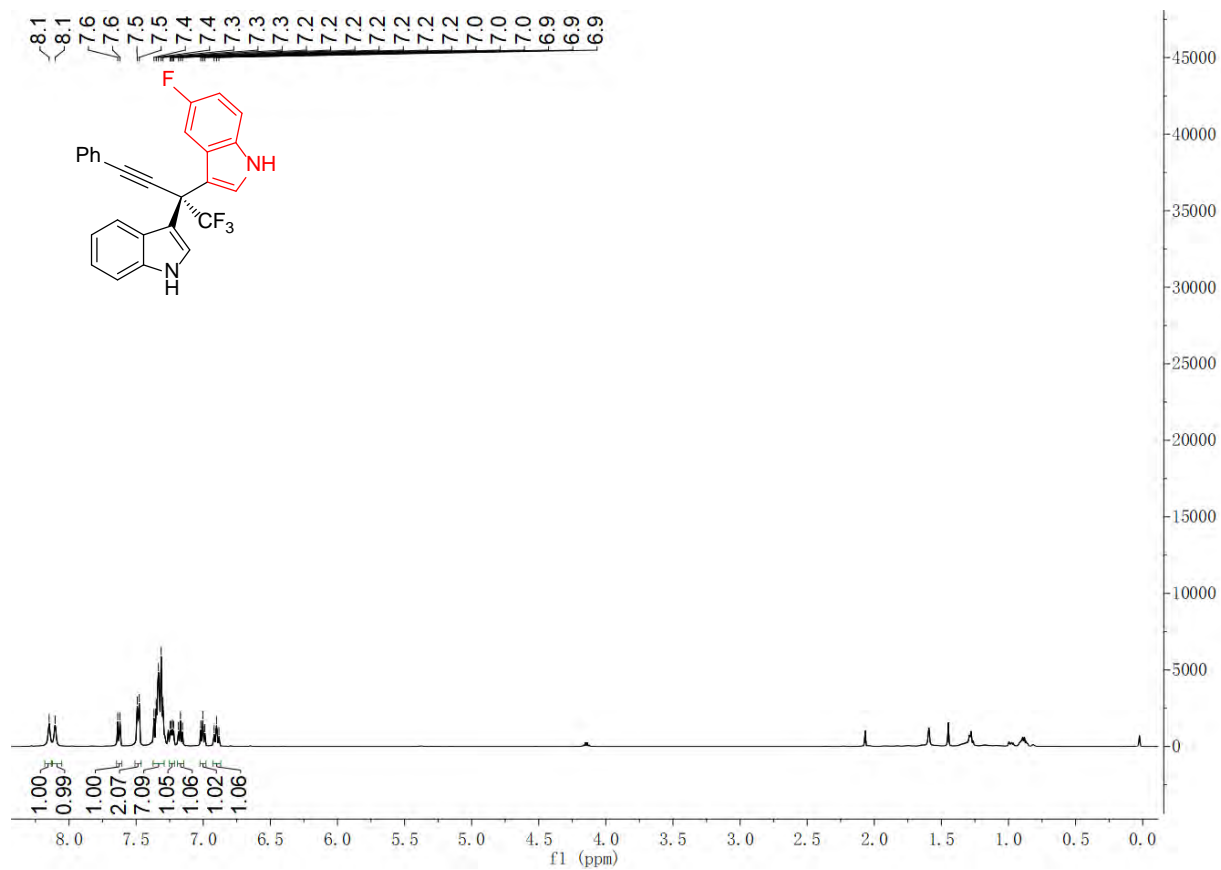

**<sup>13</sup>C NMR of compound 5n (in CDCl<sub>3</sub>)**

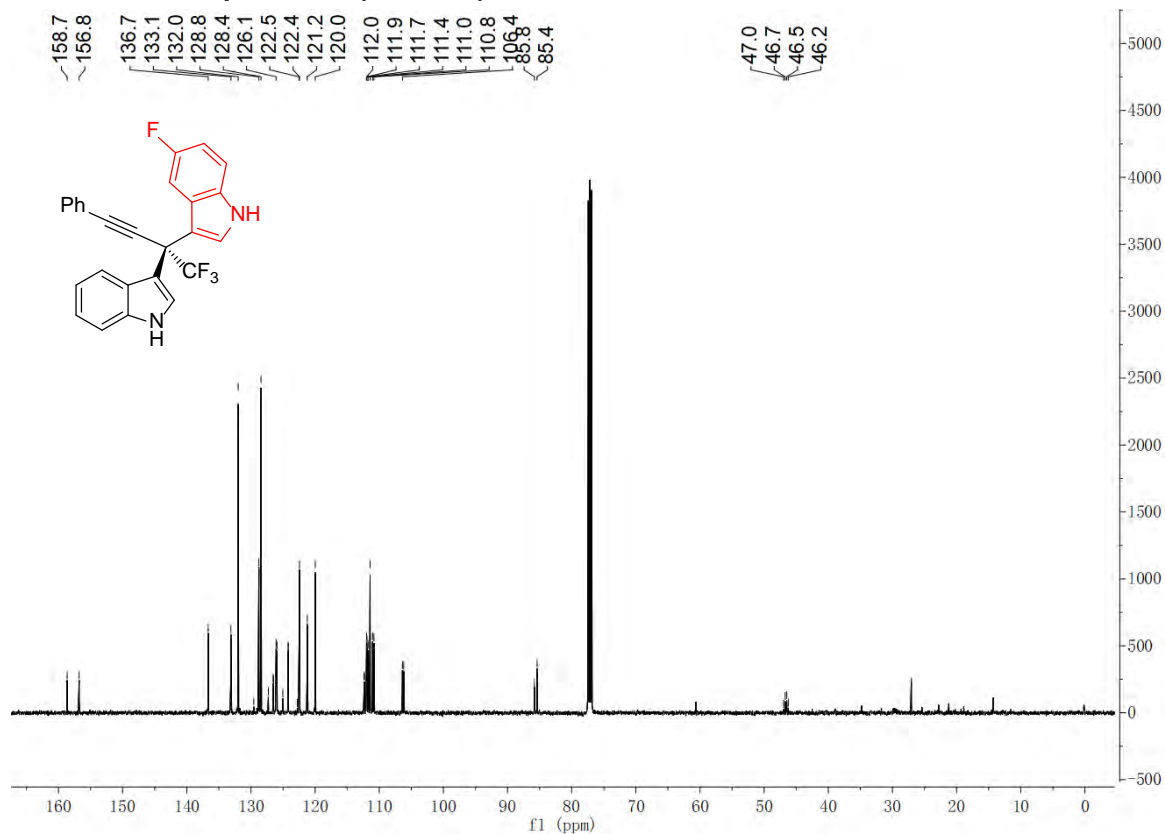

**<sup>19</sup>F NMR of compound 5n (in CDCl<sub>3</sub>)**

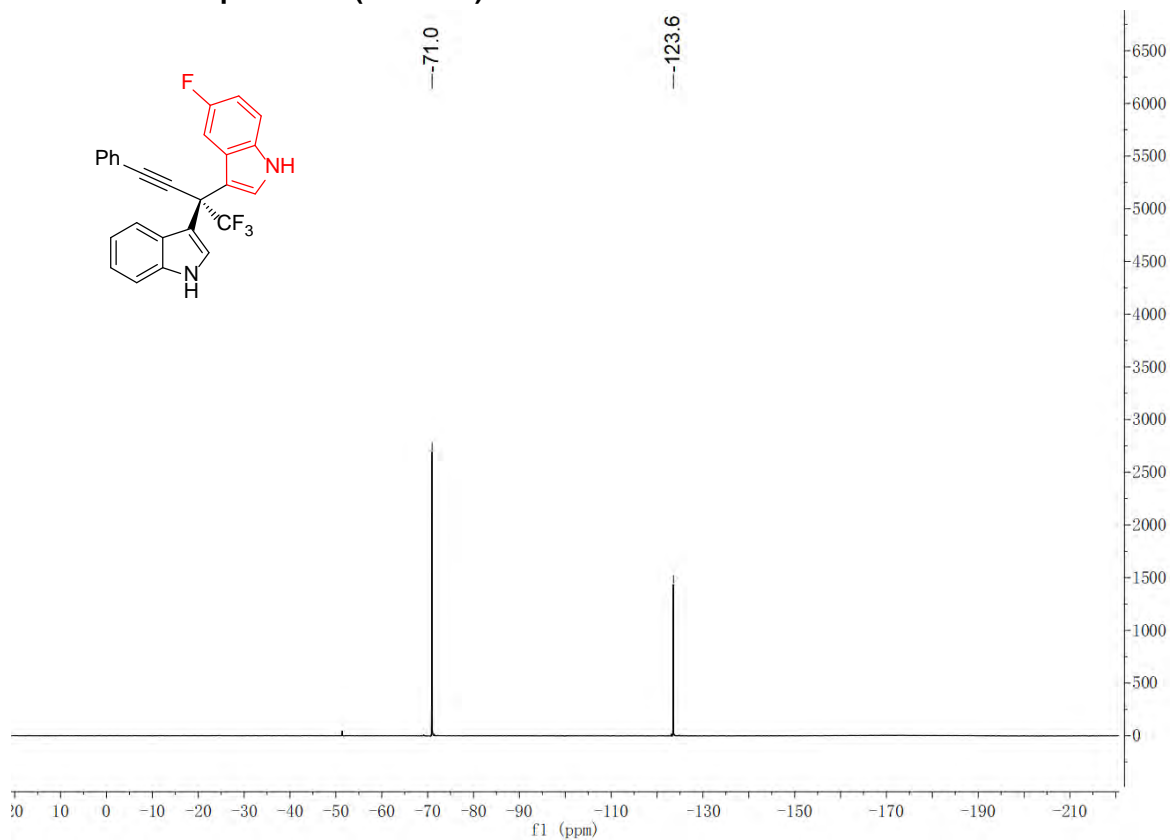

### <sup>1</sup>H NMR of compound 5o (in CDCl<sub>3</sub>)

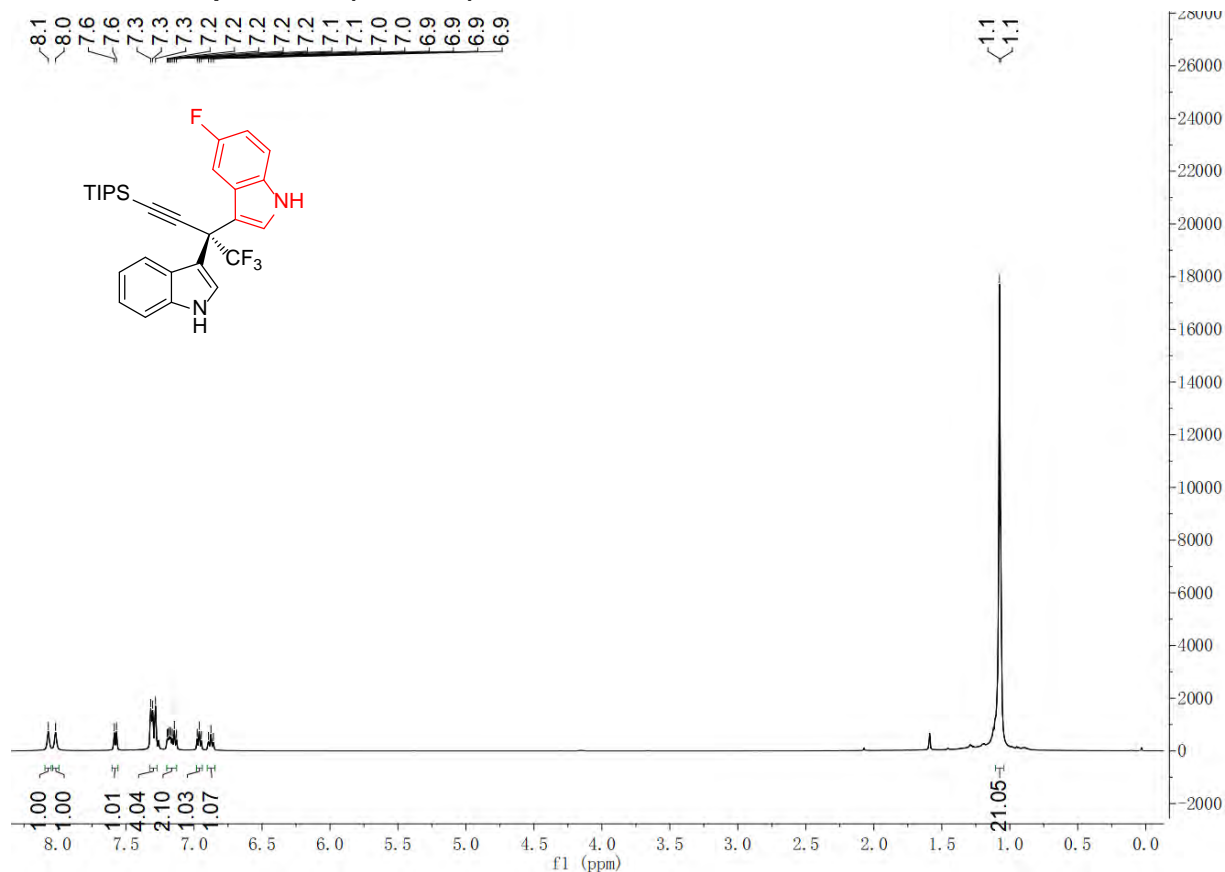

### <sup>13</sup>C NMR of compound 5o (in CDCl<sub>3</sub>)

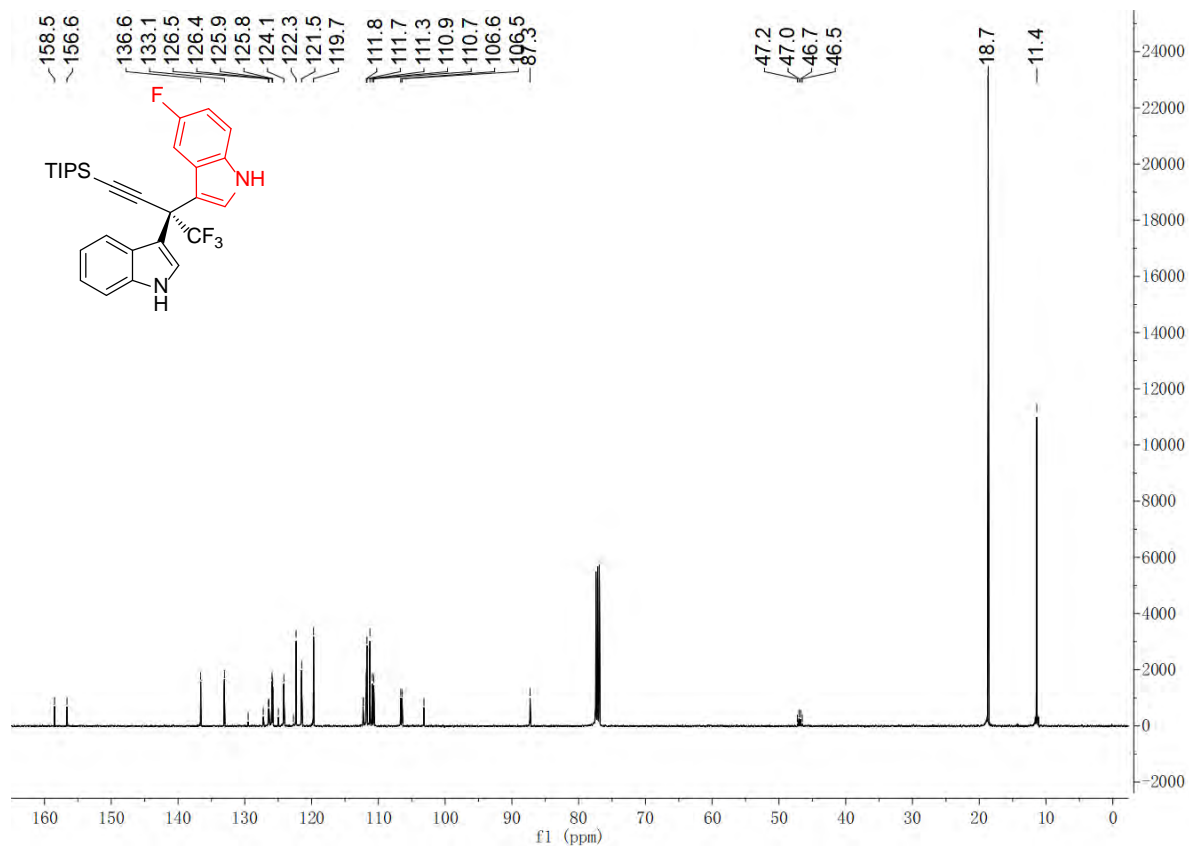

### $^{19}\text{F}$ NMR of compound 5o (in $\text{CDCl}_3$ )

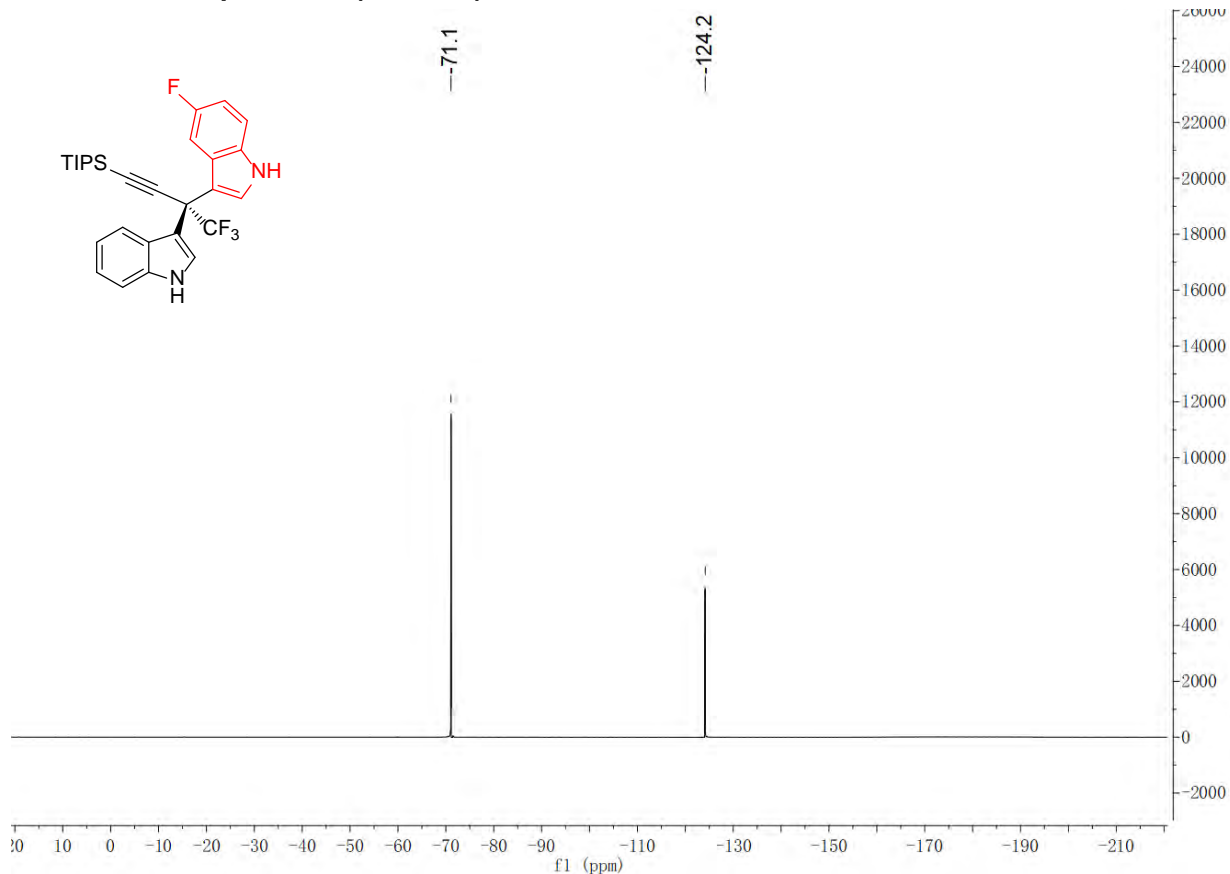

### $^1\text{H}$ NMR of compound 5p (in $\text{CDCl}_3$ )

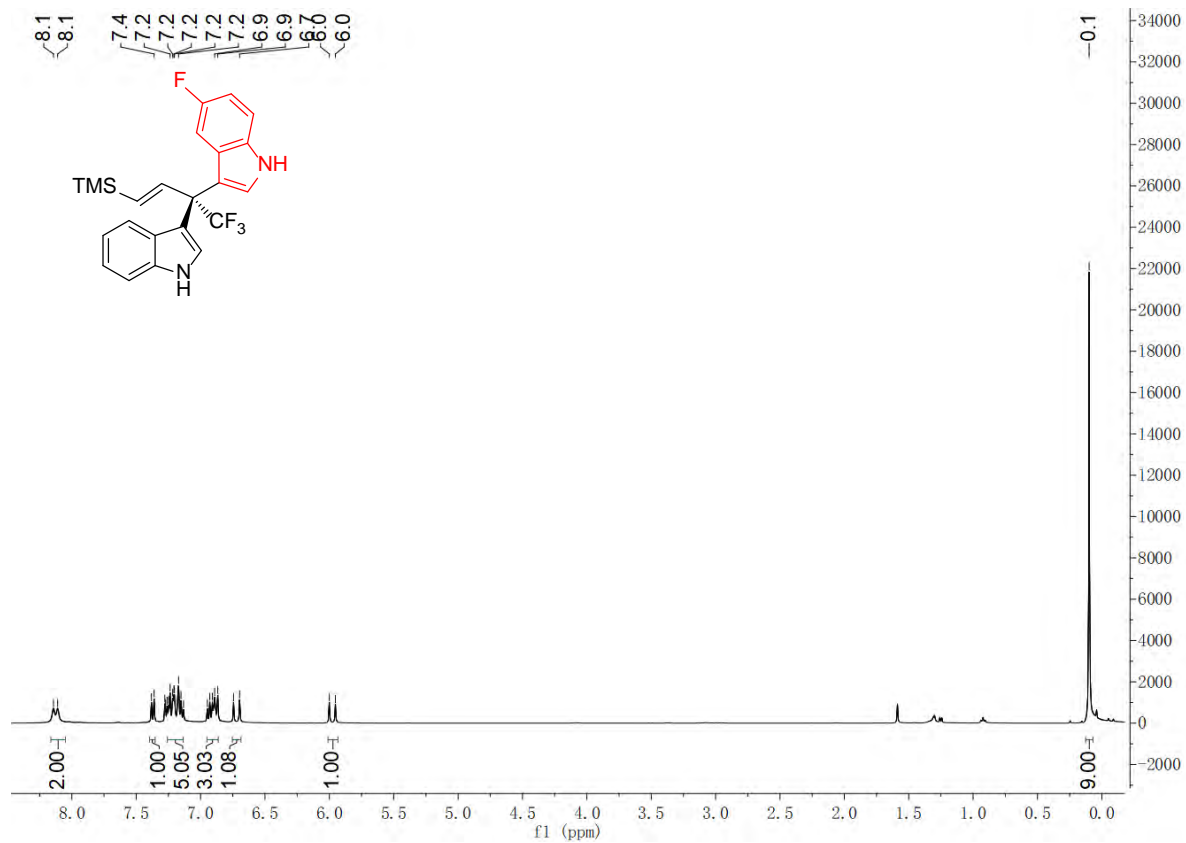

### <sup>13</sup>C NMR of compound 5p (in CDCl<sub>3</sub>)

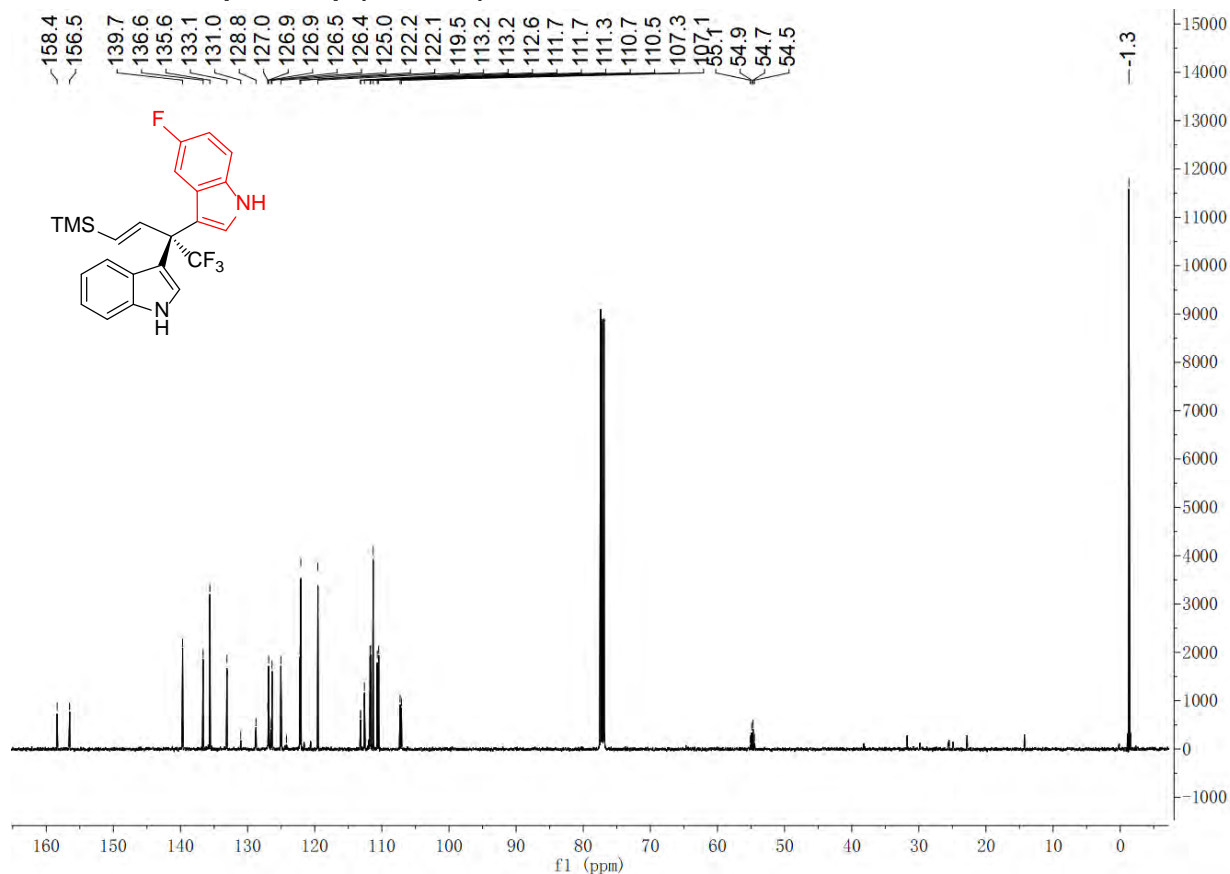

### <sup>19</sup>F NMR of compound 5p (in CDCl<sub>3</sub>)

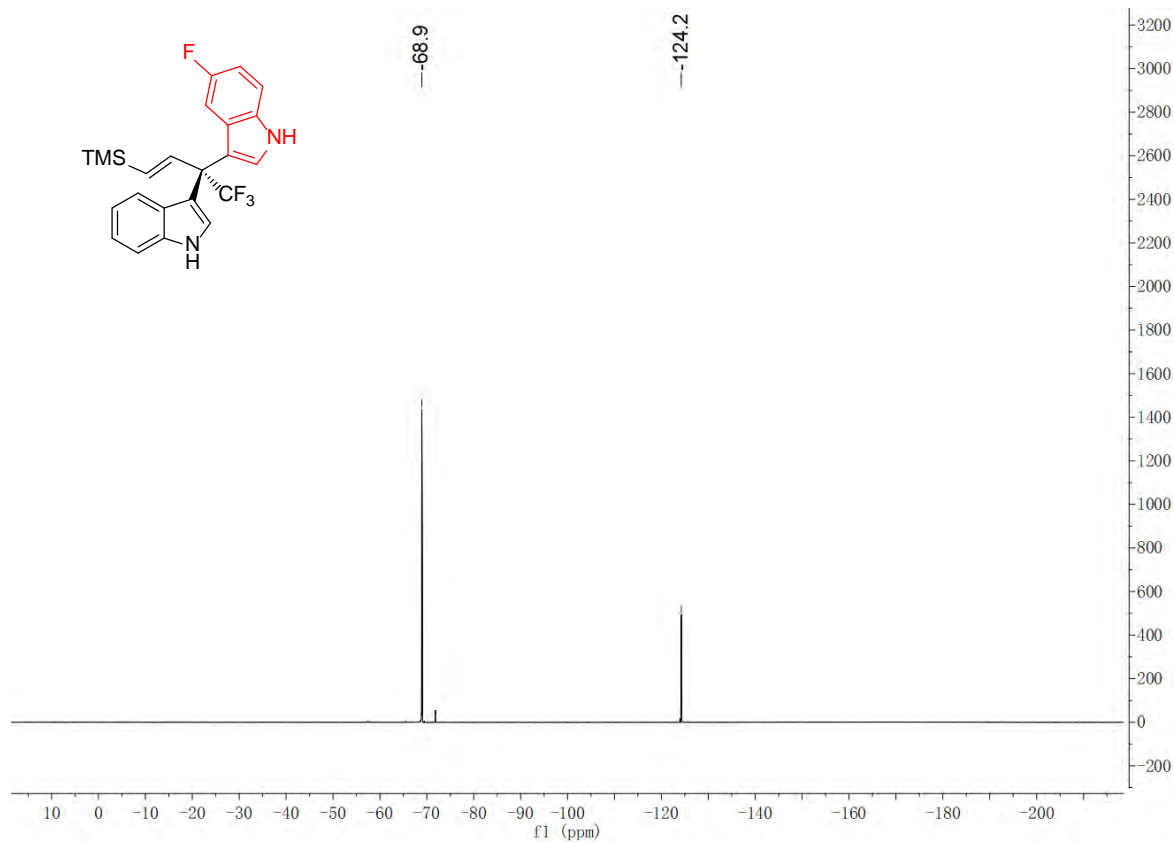

### <sup>1</sup>H NMR of compound 5q (in CDCl<sub>3</sub>)

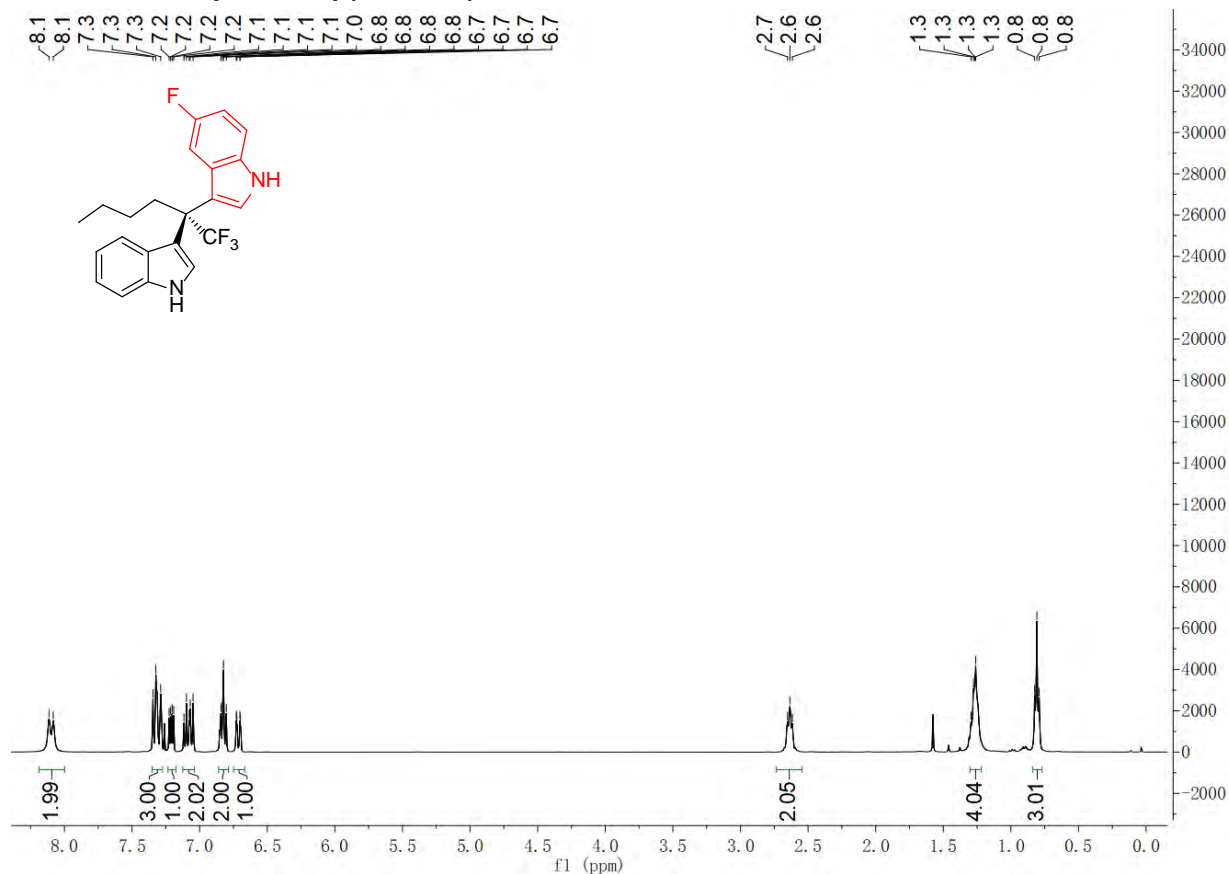

### <sup>13</sup>C NMR of compound 5q (in CDCl<sub>3</sub>)

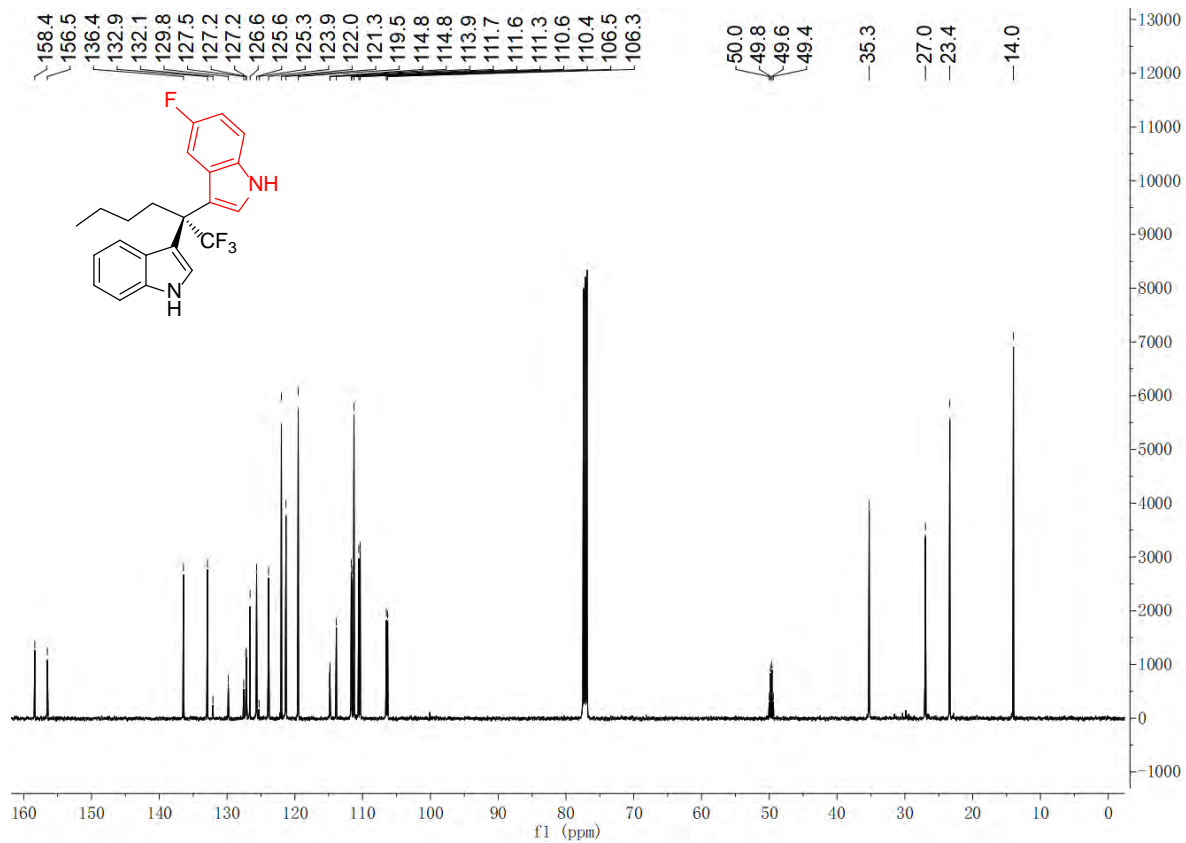

**<sup>19</sup>F NMR of compound 5q (in CDCl<sub>3</sub>)**

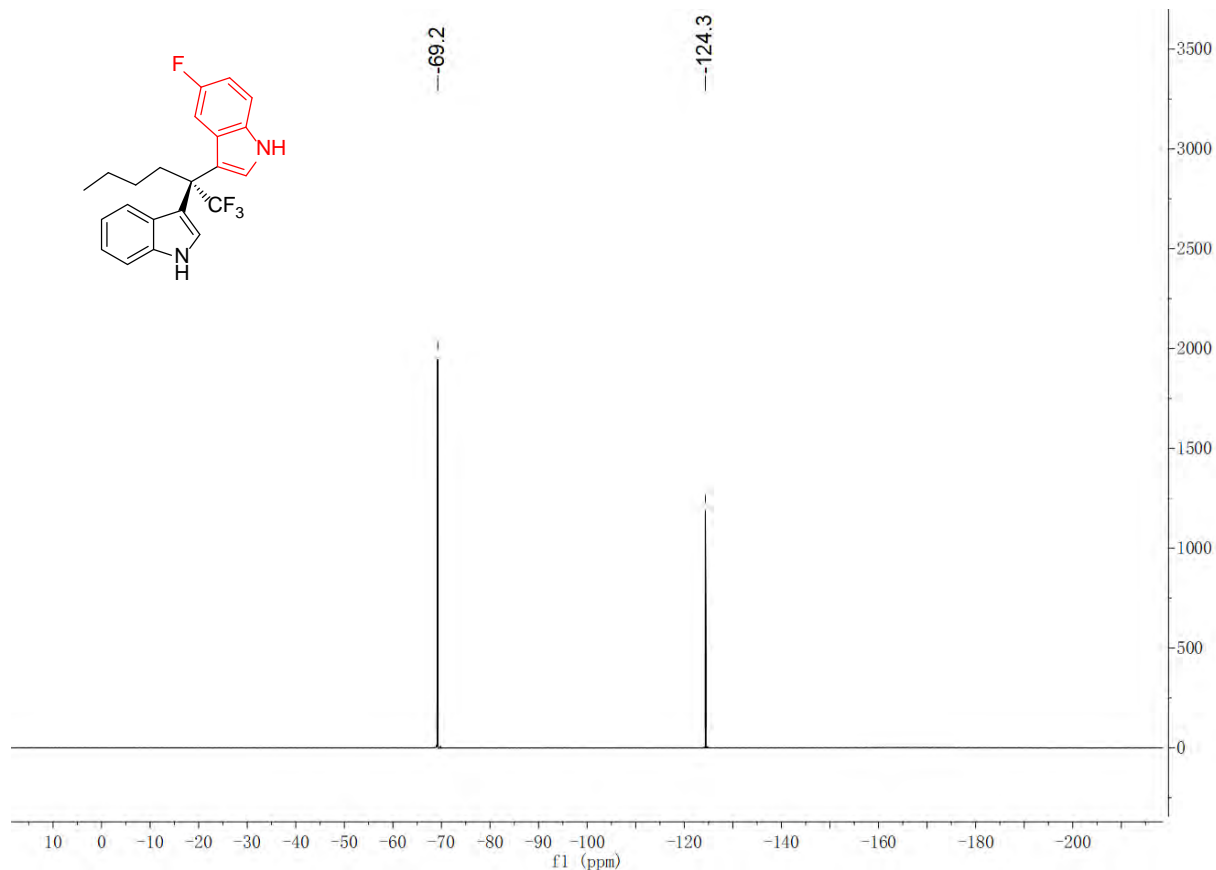

**<sup>1</sup>H NMR of compound 5r (in CDCl<sub>3</sub>)**

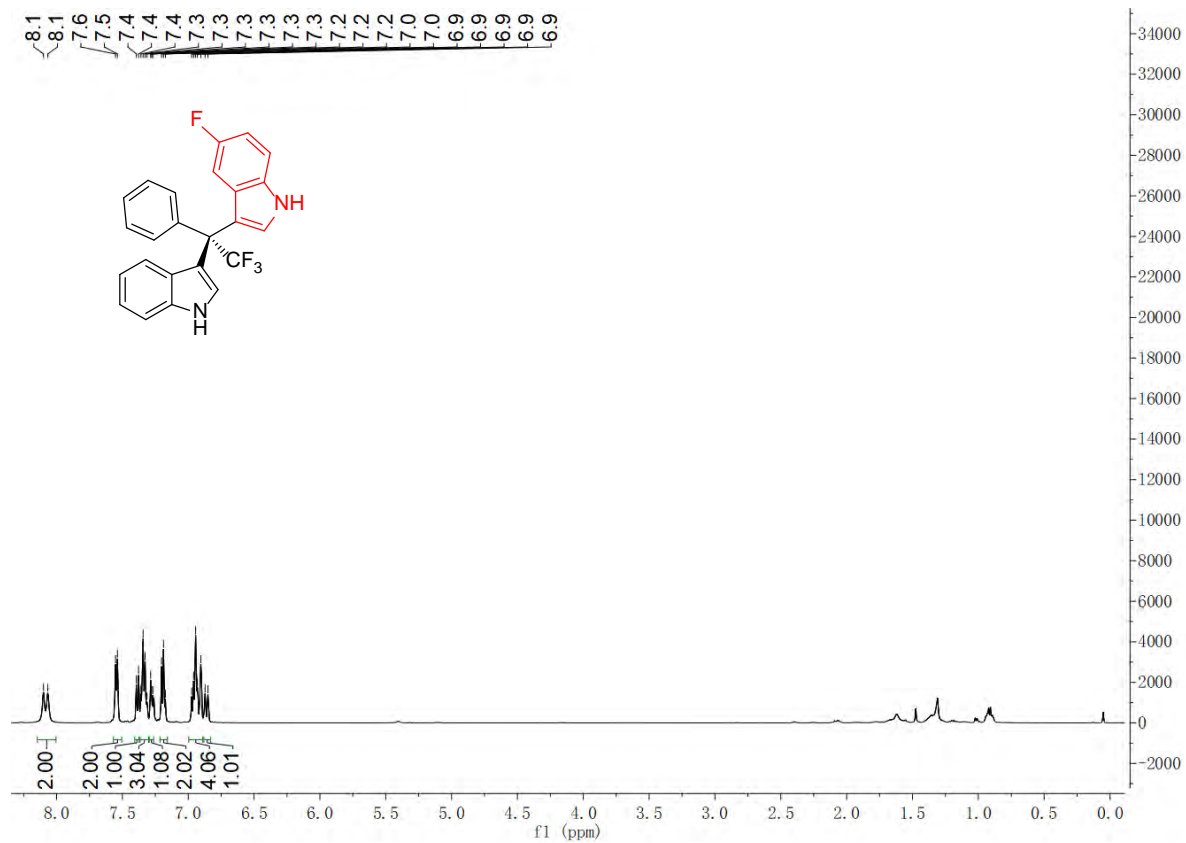

### <sup>13</sup>C NMR of compound 5r (in CDCl<sub>3</sub>)

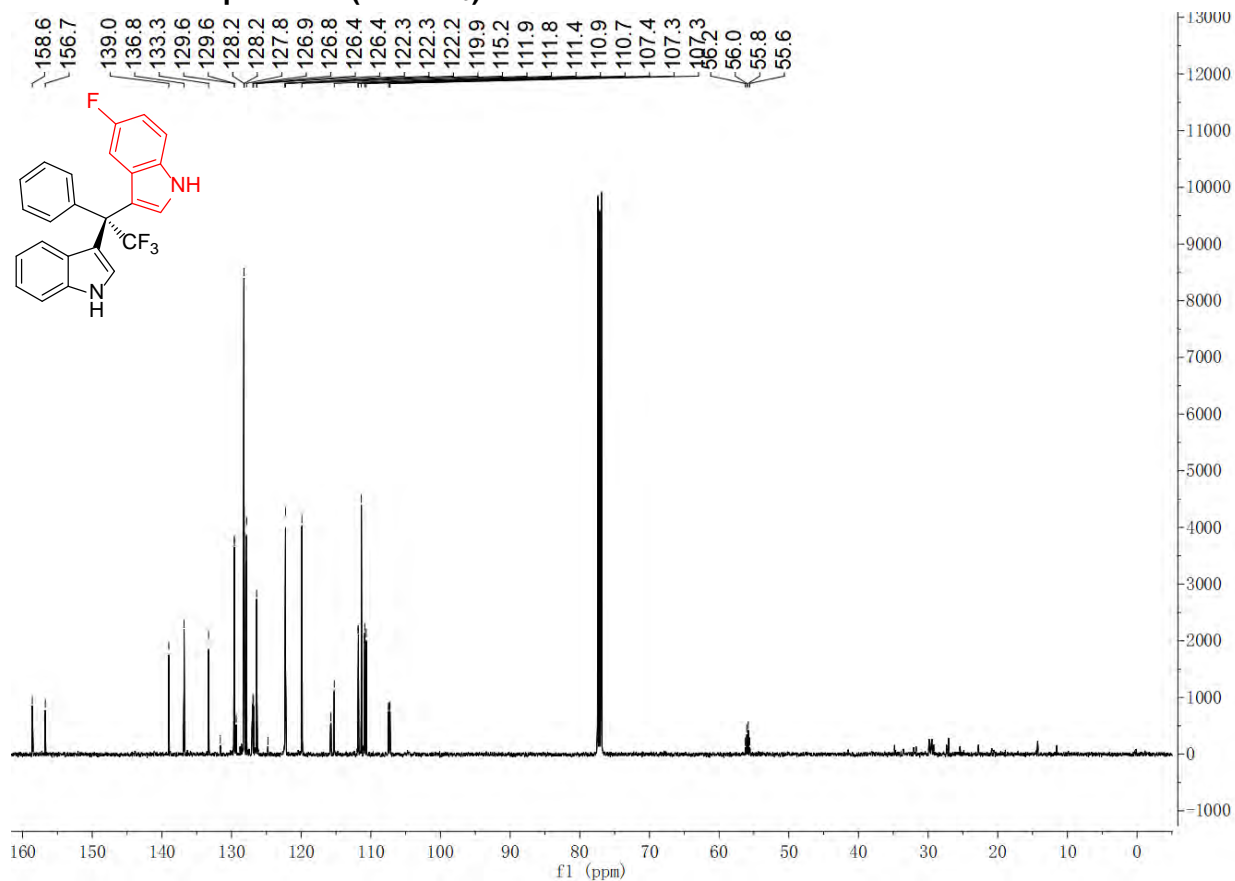

### <sup>19</sup>F NMR of compound 5r (in CDCl<sub>3</sub>)

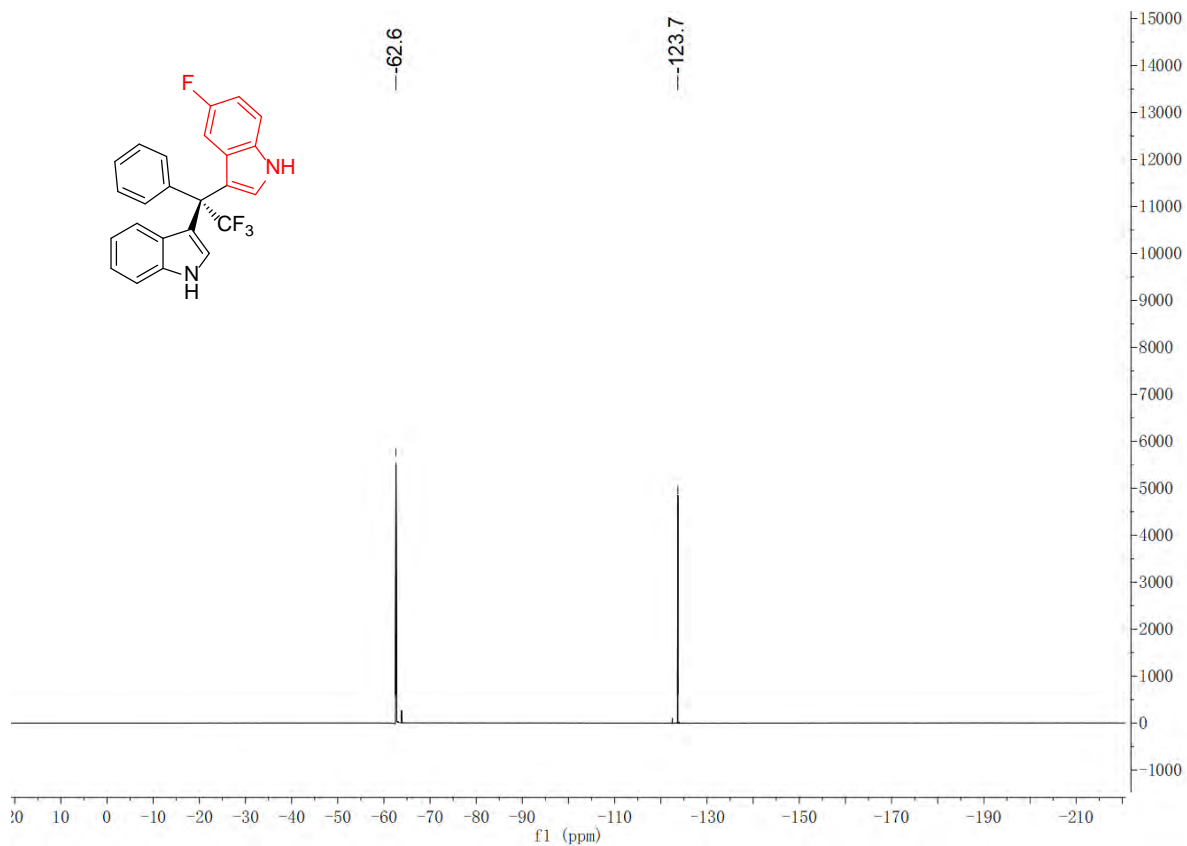



### <sup>1</sup>H NMR of compound 7a (in CDCl<sub>3</sub>)

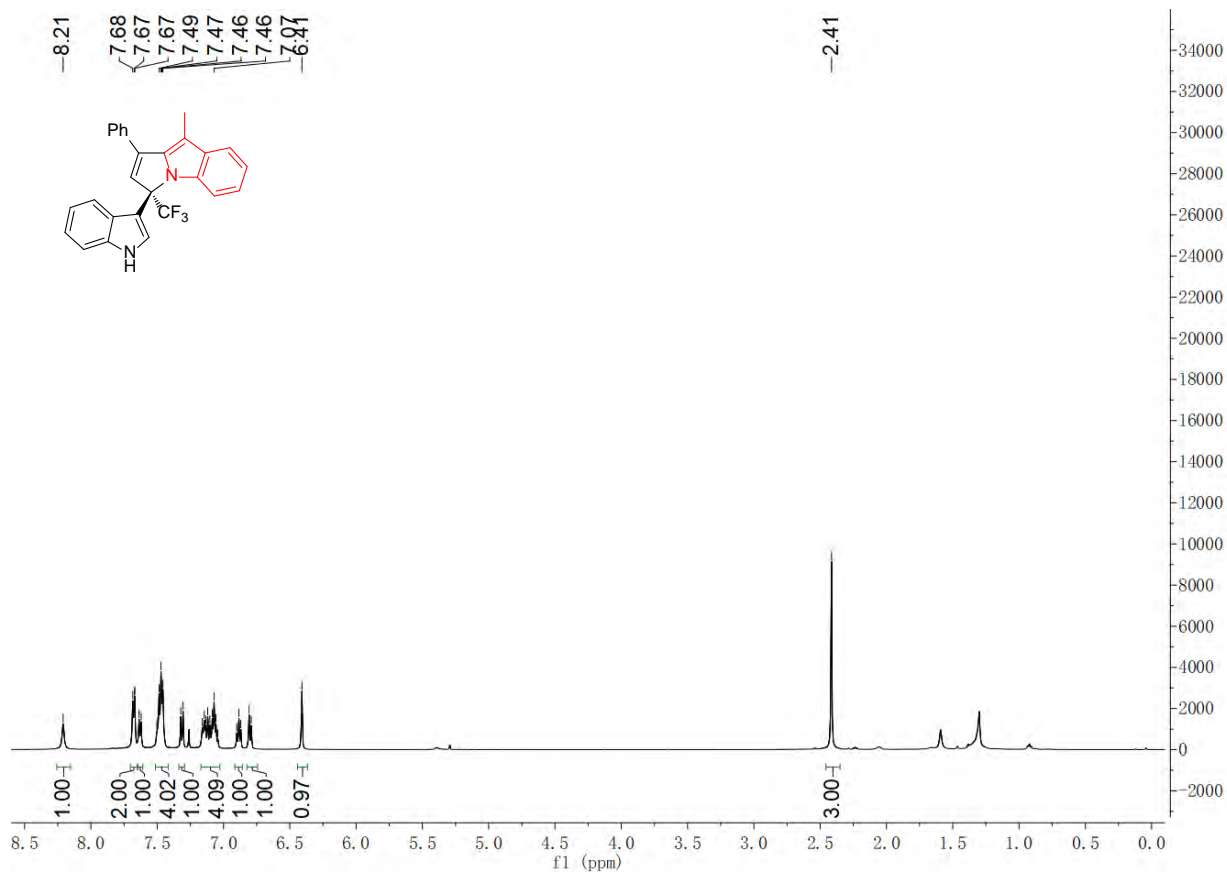

### <sup>13</sup>C NMR of compound 7a (in CDCl<sub>3</sub>)

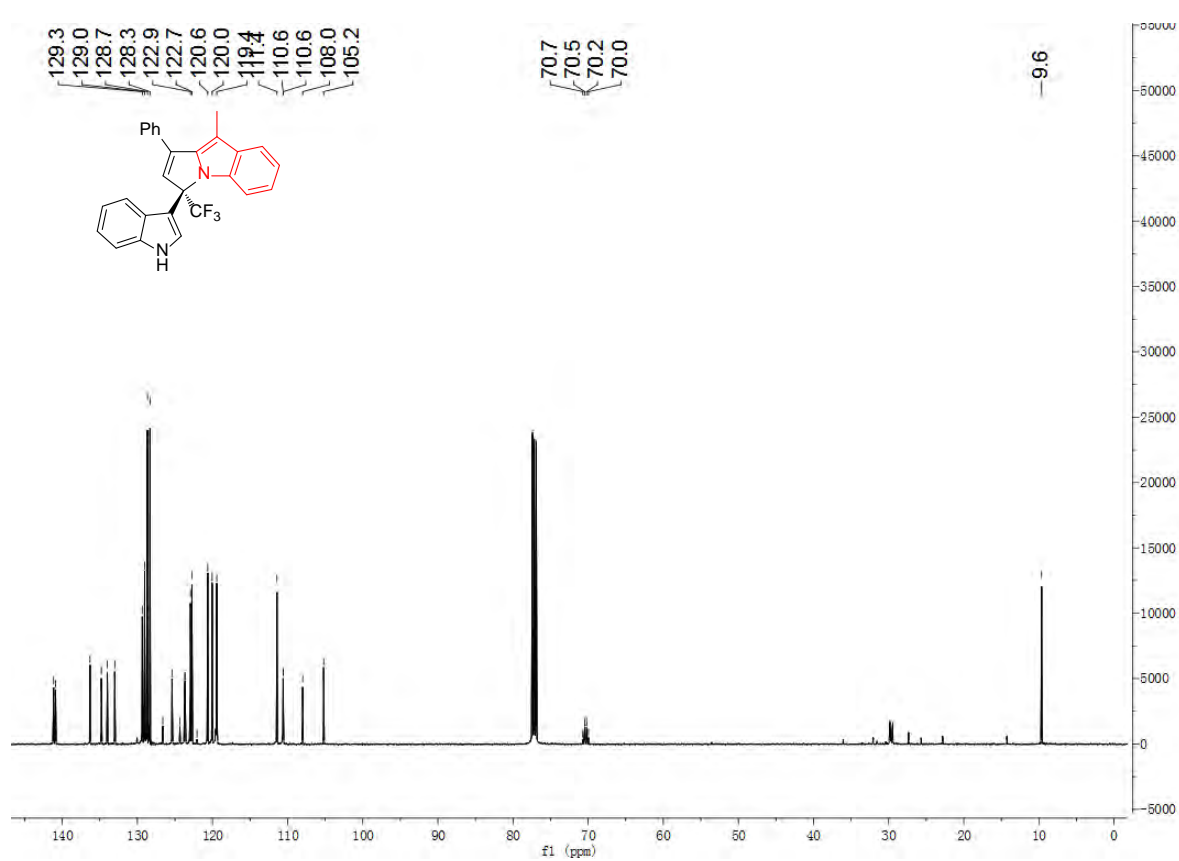

### <sup>19</sup>F NMR of compound 7a (in CDCl<sub>3</sub>)

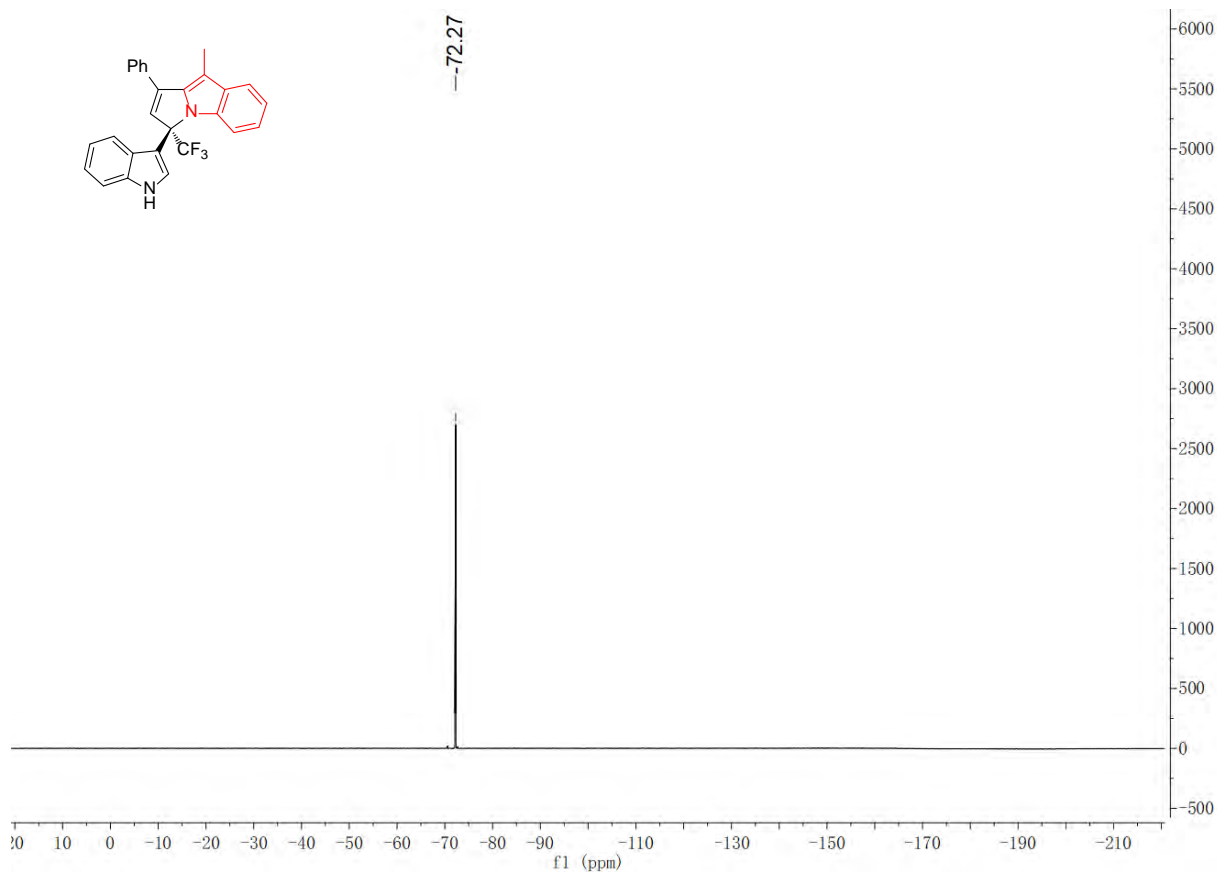

### <sup>1</sup>H NMR of compound 7b (in CDCl<sub>3</sub>)

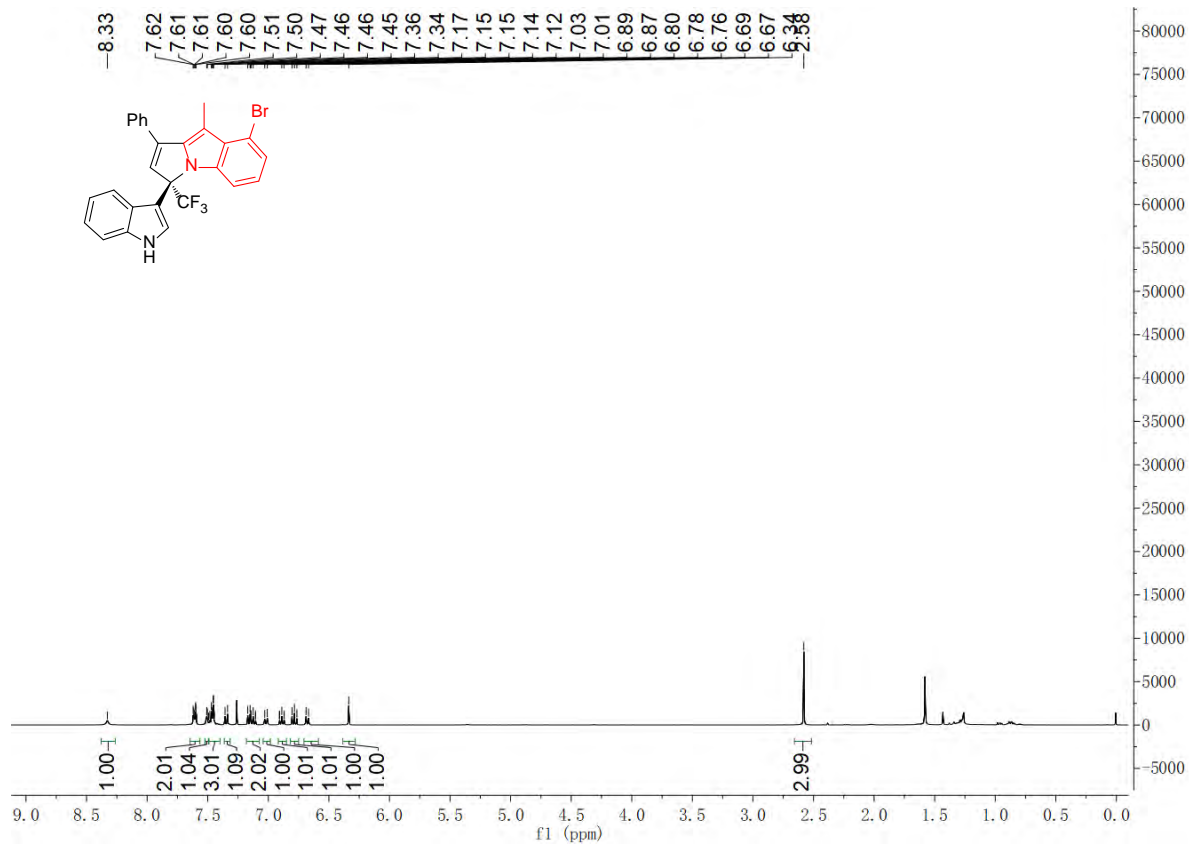

**<sup>13</sup>C NMR of compound 7b (in CDCl<sub>3</sub>)**

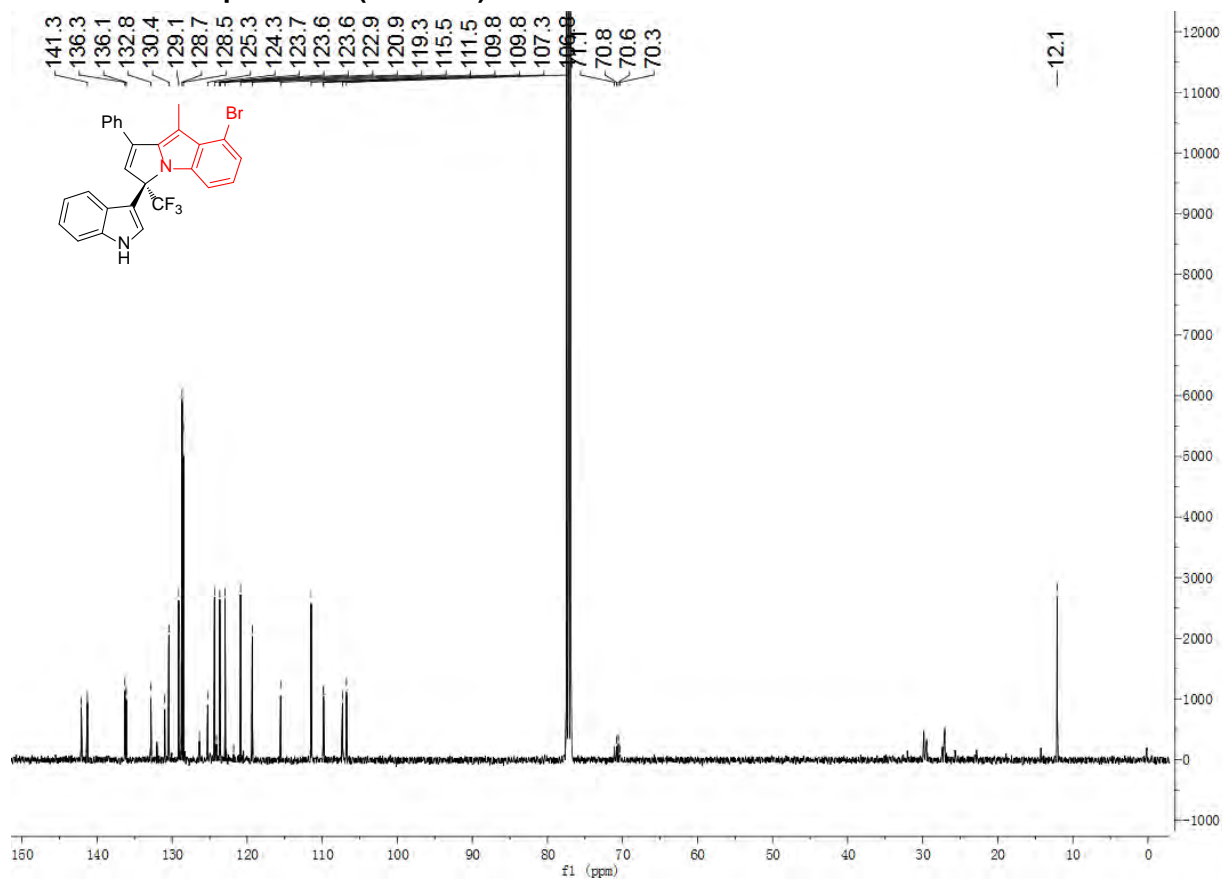

**<sup>19</sup>F NMR of compound 7b (in CDCl<sub>3</sub>)**

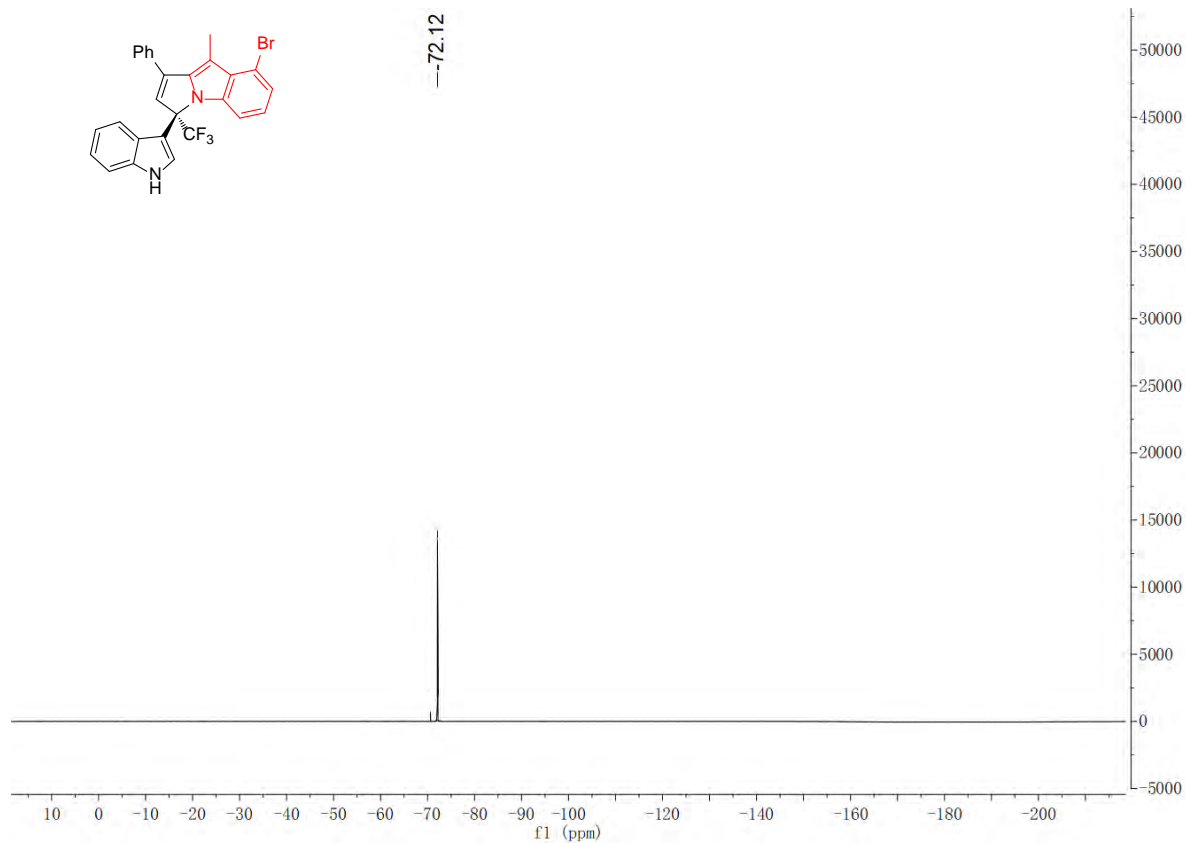

### <sup>1</sup>H NMR of compound 7c (in CDCl<sub>3</sub>)

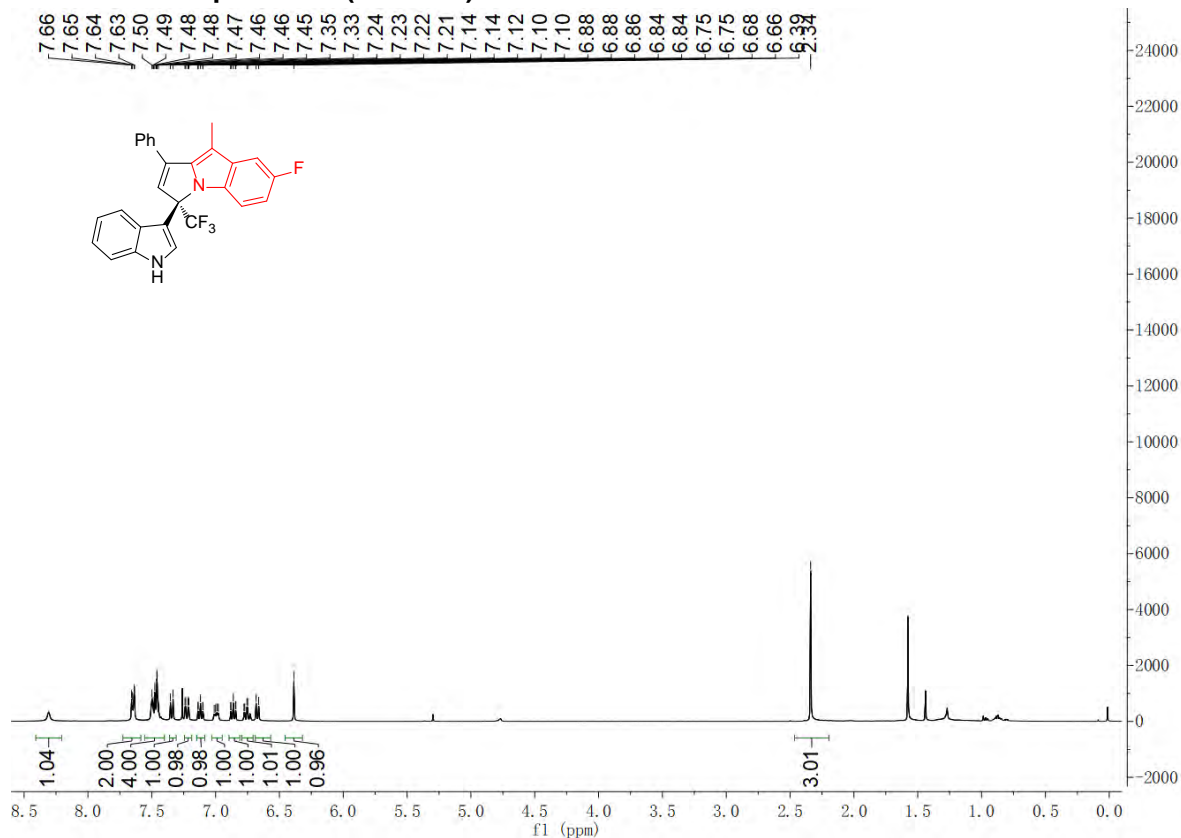

### <sup>13</sup>C NMR of compound 7c (in CDCl<sub>3</sub>)

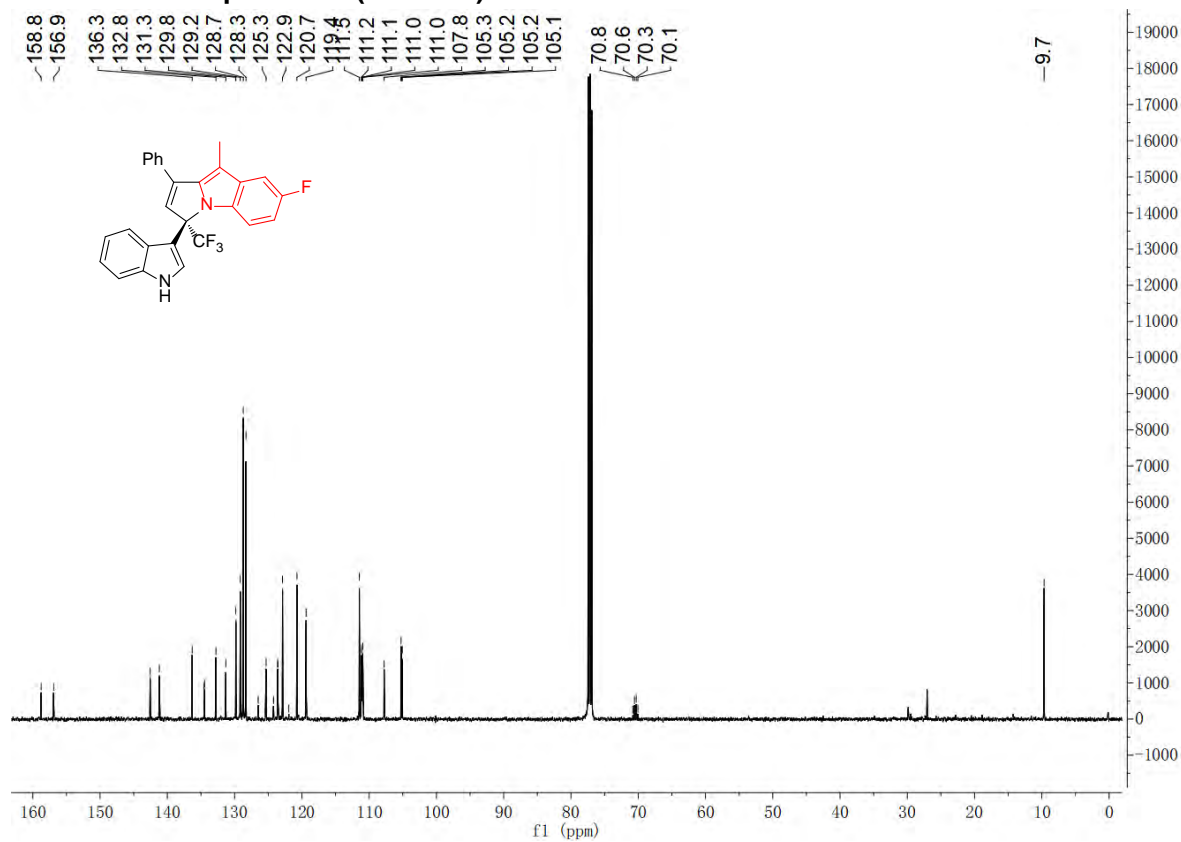

### <sup>19</sup>F NMR of compound 7c (in CDCl<sub>3</sub>)

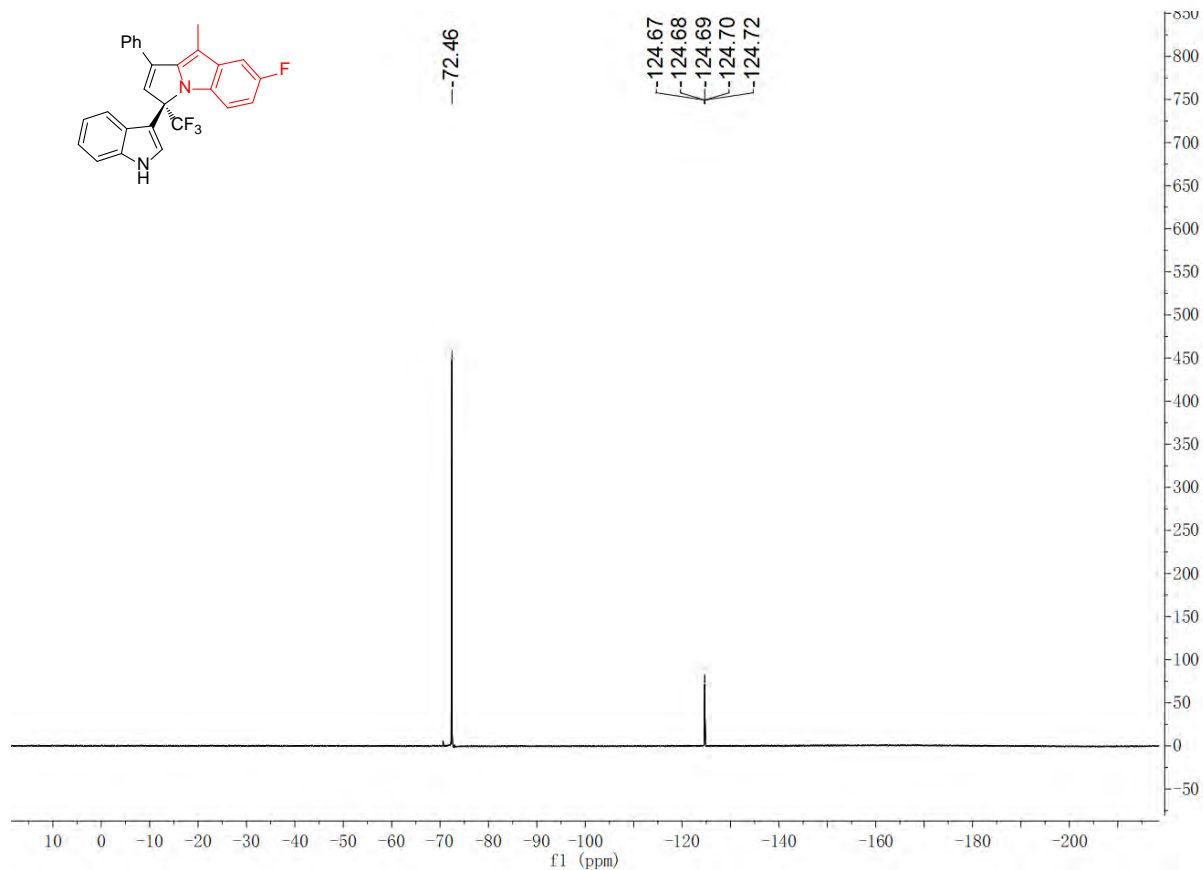

### <sup>1</sup>H NMR of compound 7d (in CDCl<sub>3</sub>)

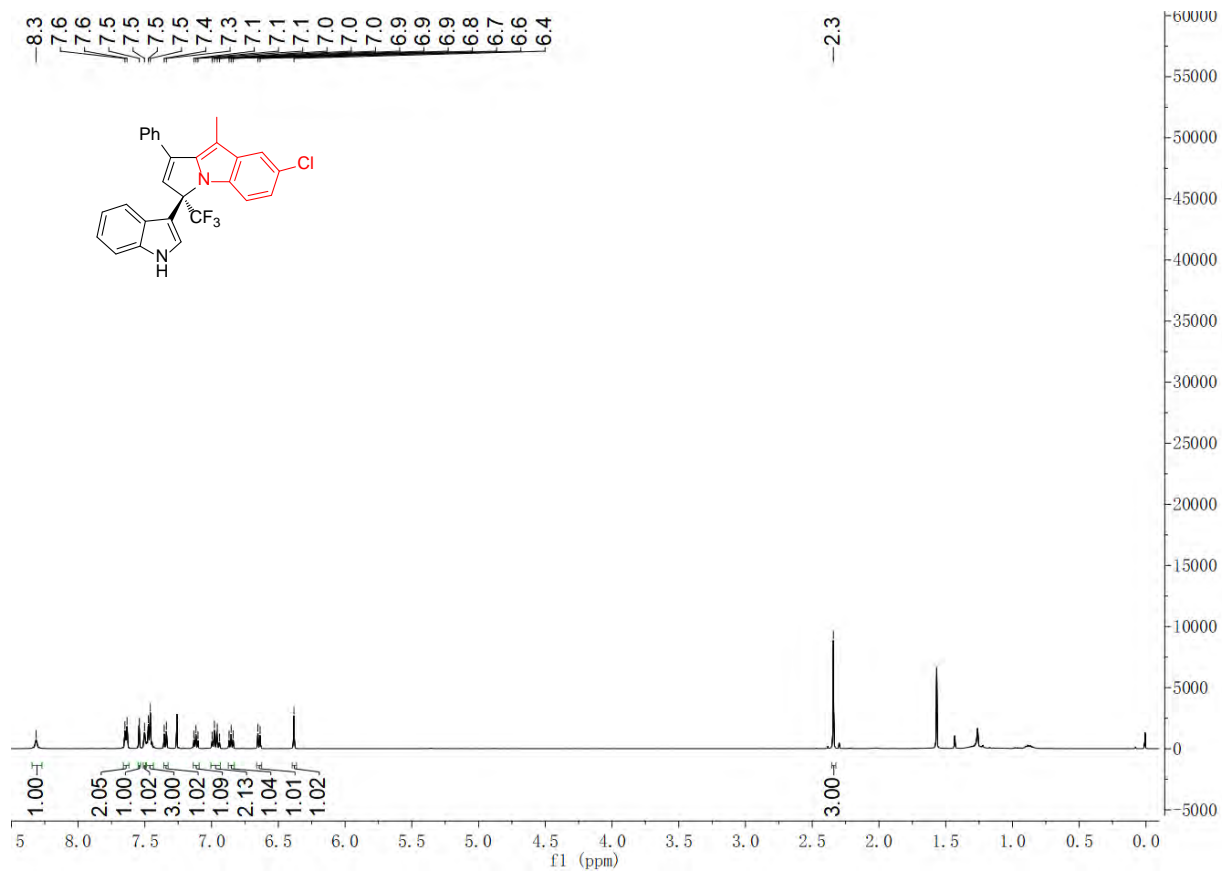

### <sup>13</sup>C NMR of compound 7d (in CDCl<sub>3</sub>)

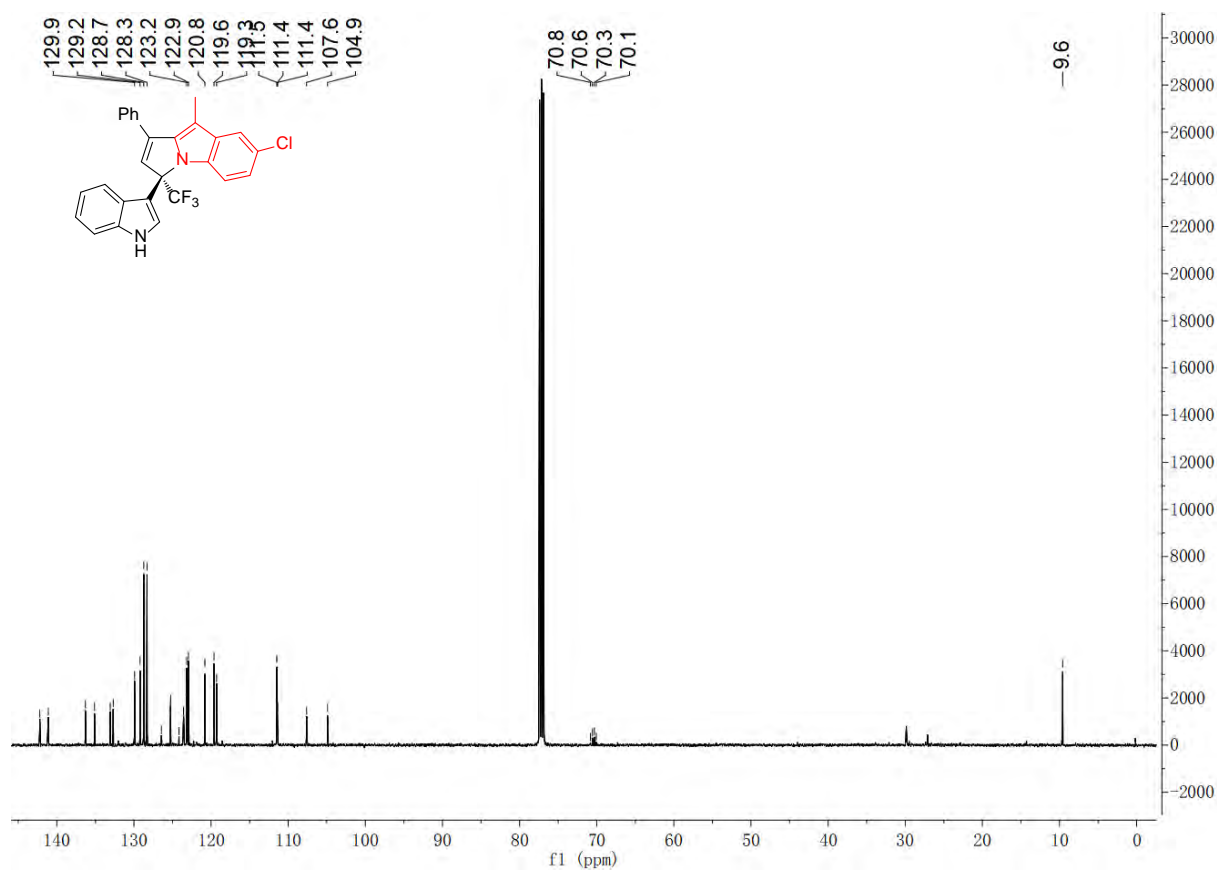

### <sup>19</sup>F NMR of compound 7d (in CDCl<sub>3</sub>)

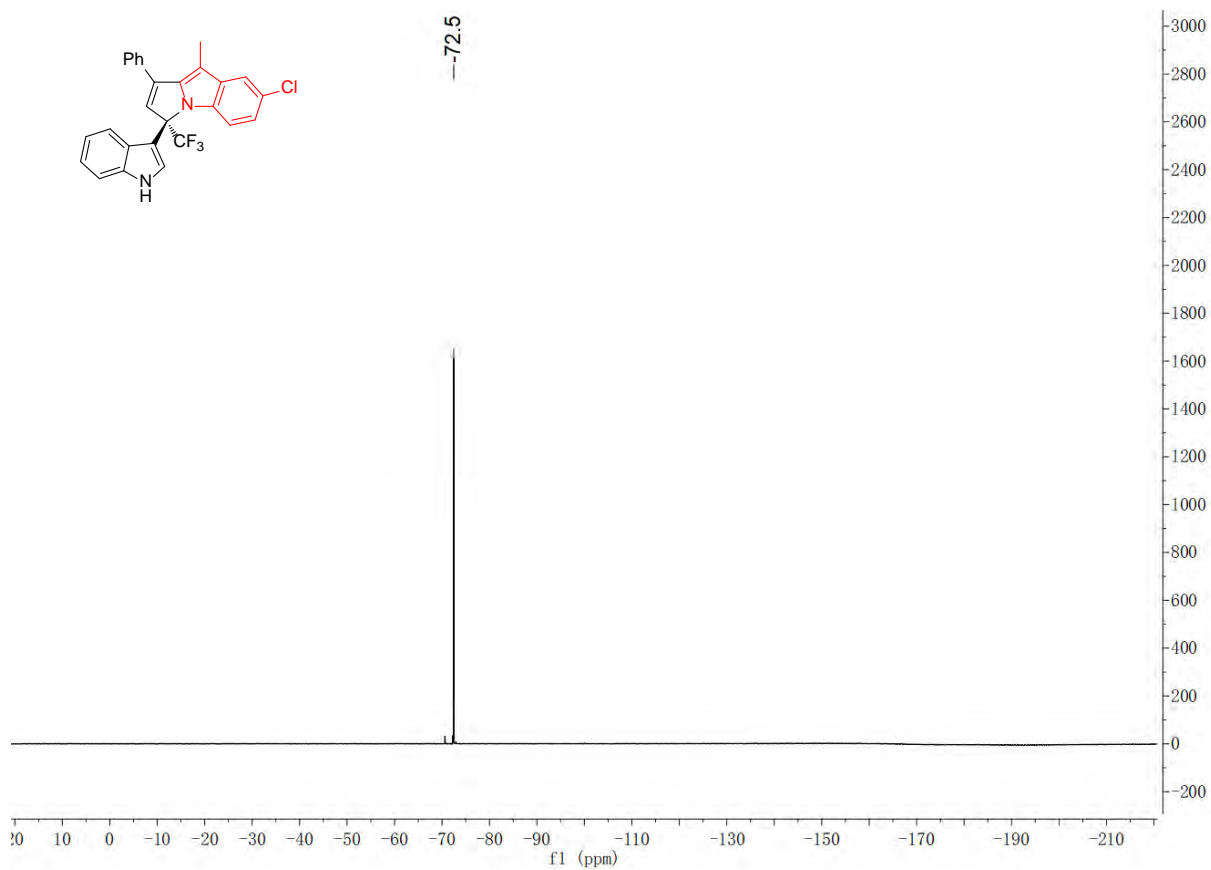

### <sup>1</sup>H NMR of compound 7e (in CDCl<sub>3</sub>)

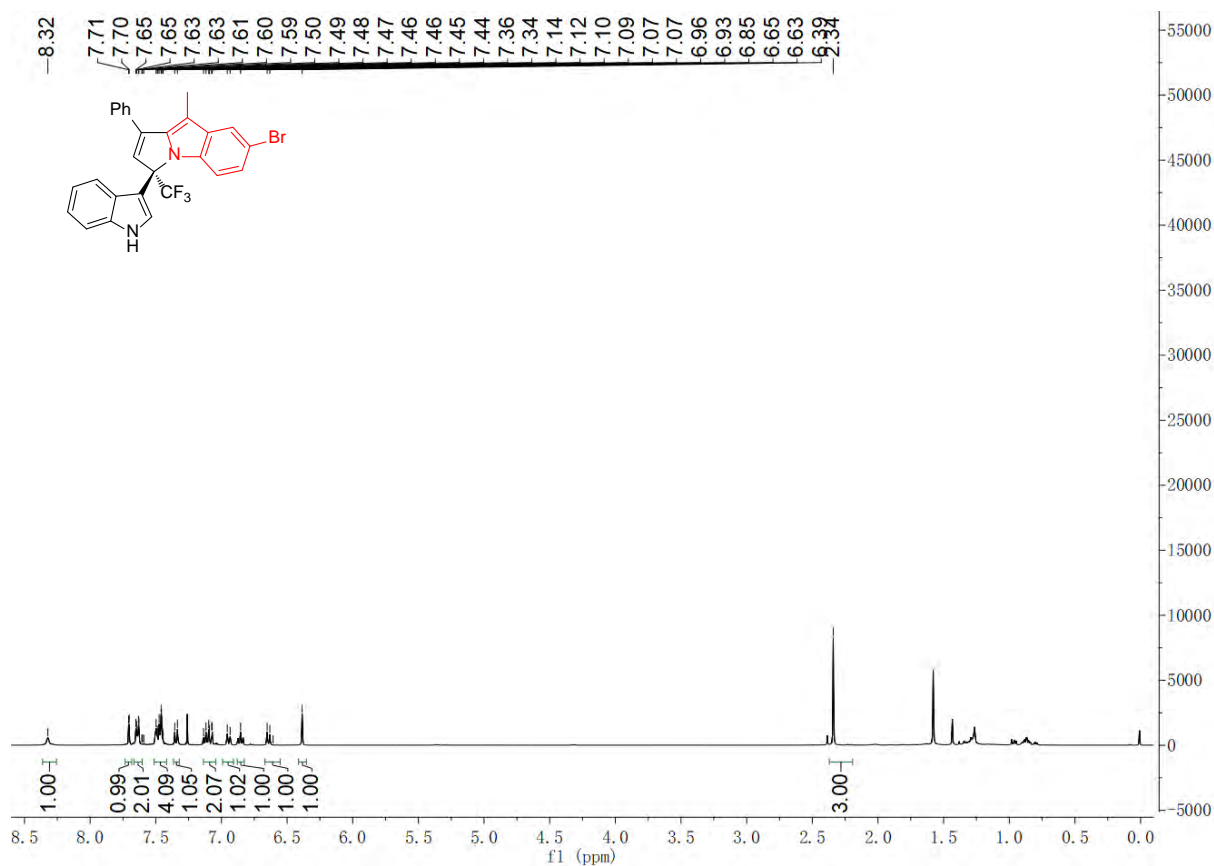

### <sup>13</sup>C NMR of compound 7e (in CDCl<sub>3</sub>)

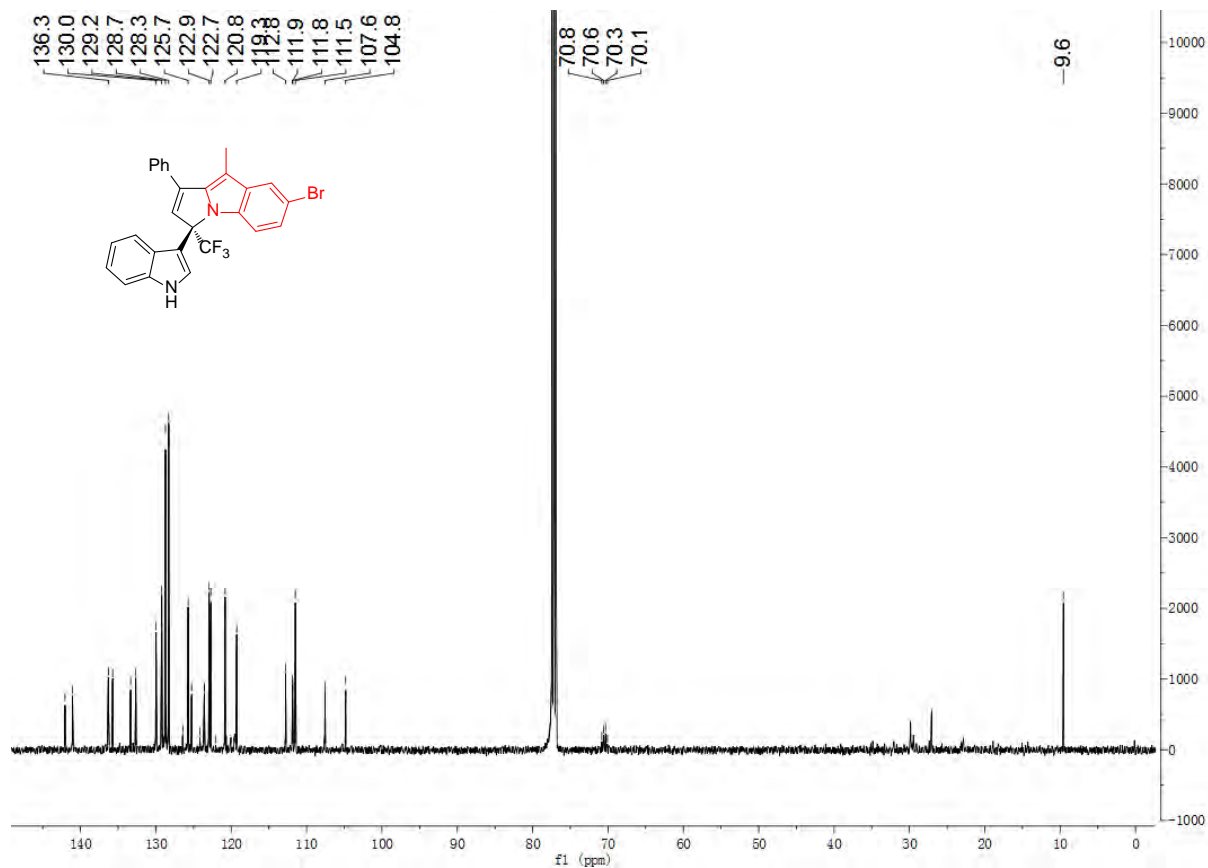

### <sup>19</sup>F NMR of compound 7e (in CDCl<sub>3</sub>)

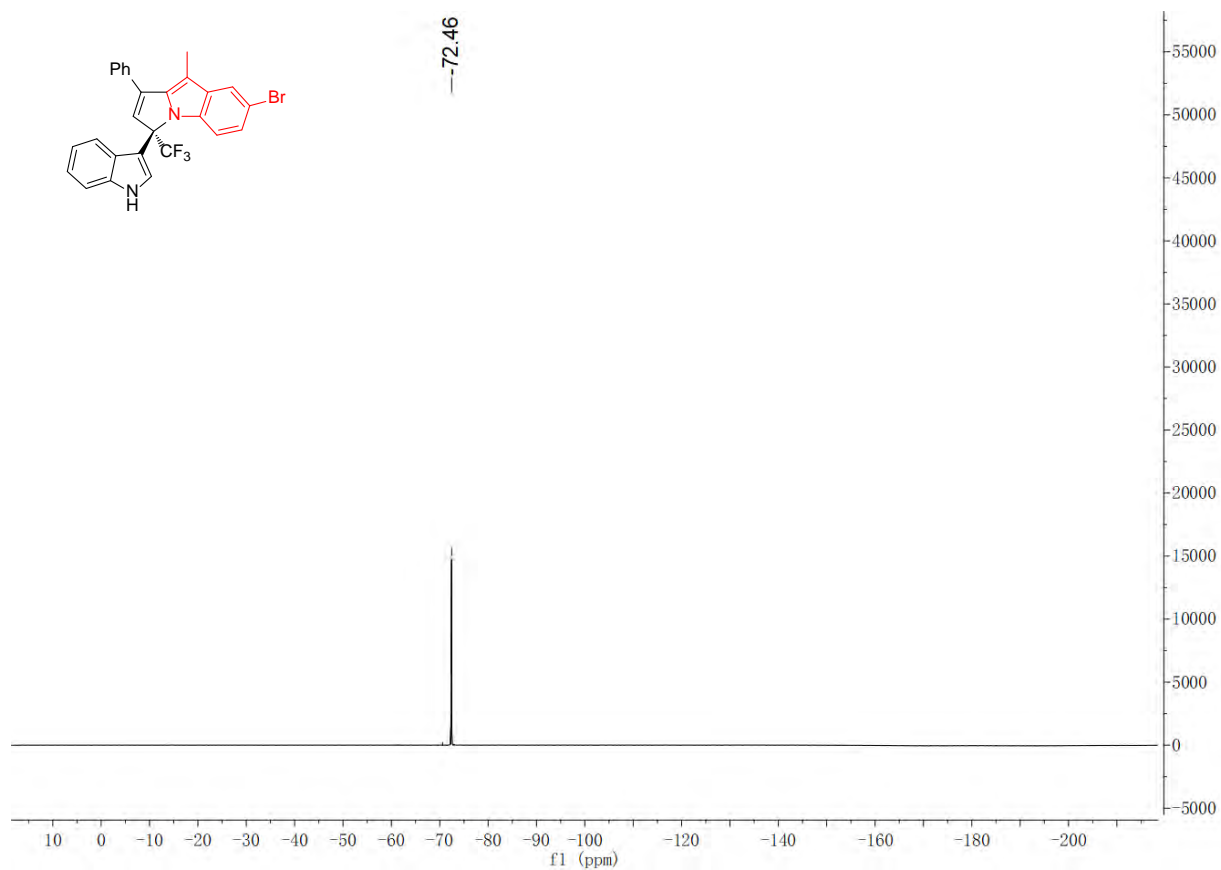

### <sup>1</sup>H NMR of compound 7f (in CDCl<sub>3</sub>)

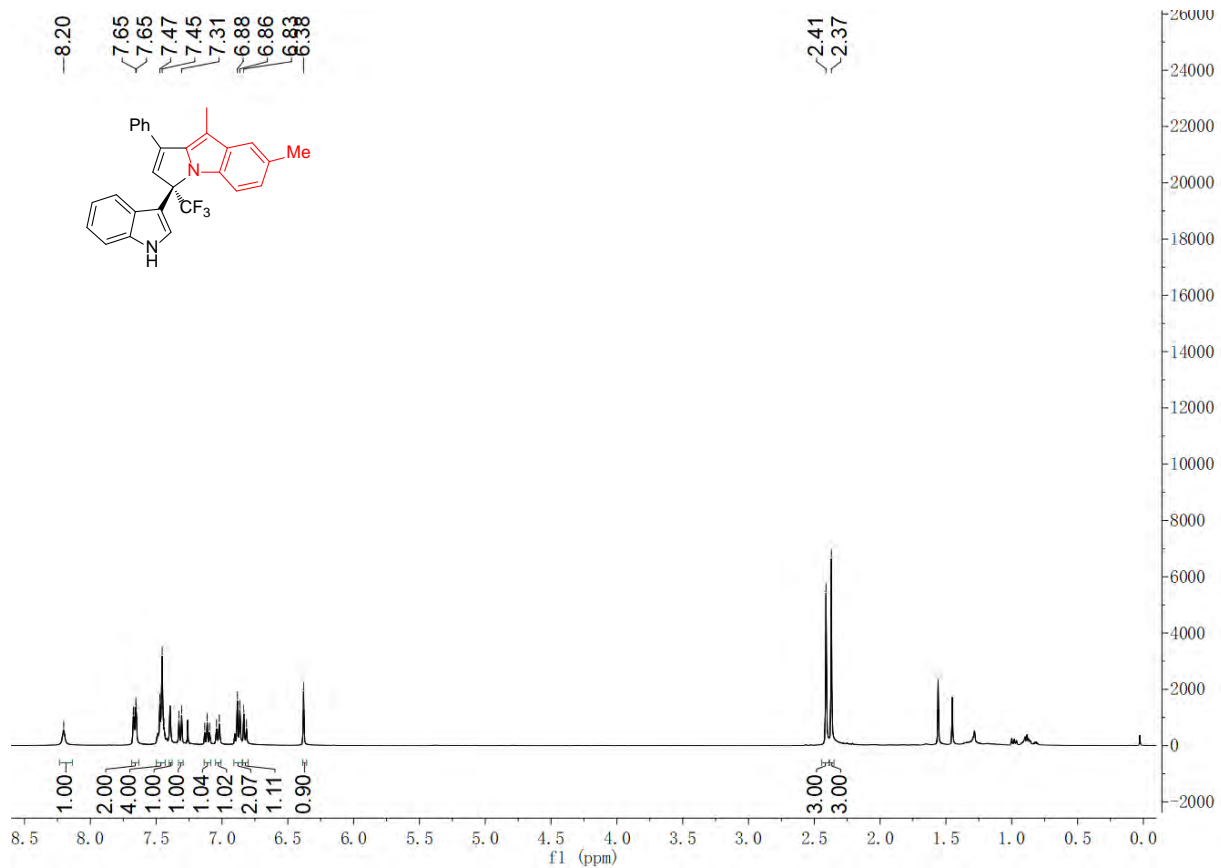



### <sup>13</sup>C NMR of compound 7f (in CDCl<sub>3</sub>)

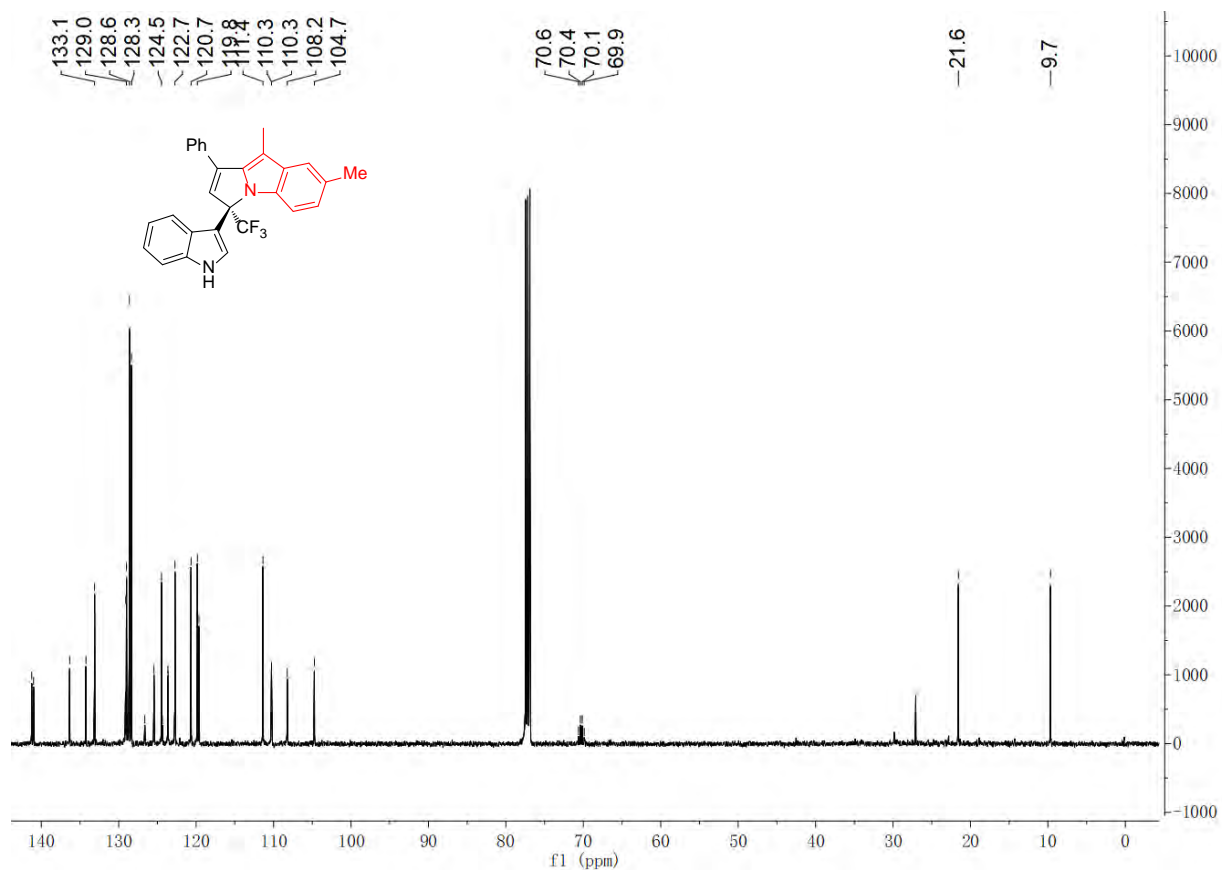

### <sup>19</sup>F NMR of compound 7f (in CDCl<sub>3</sub>)

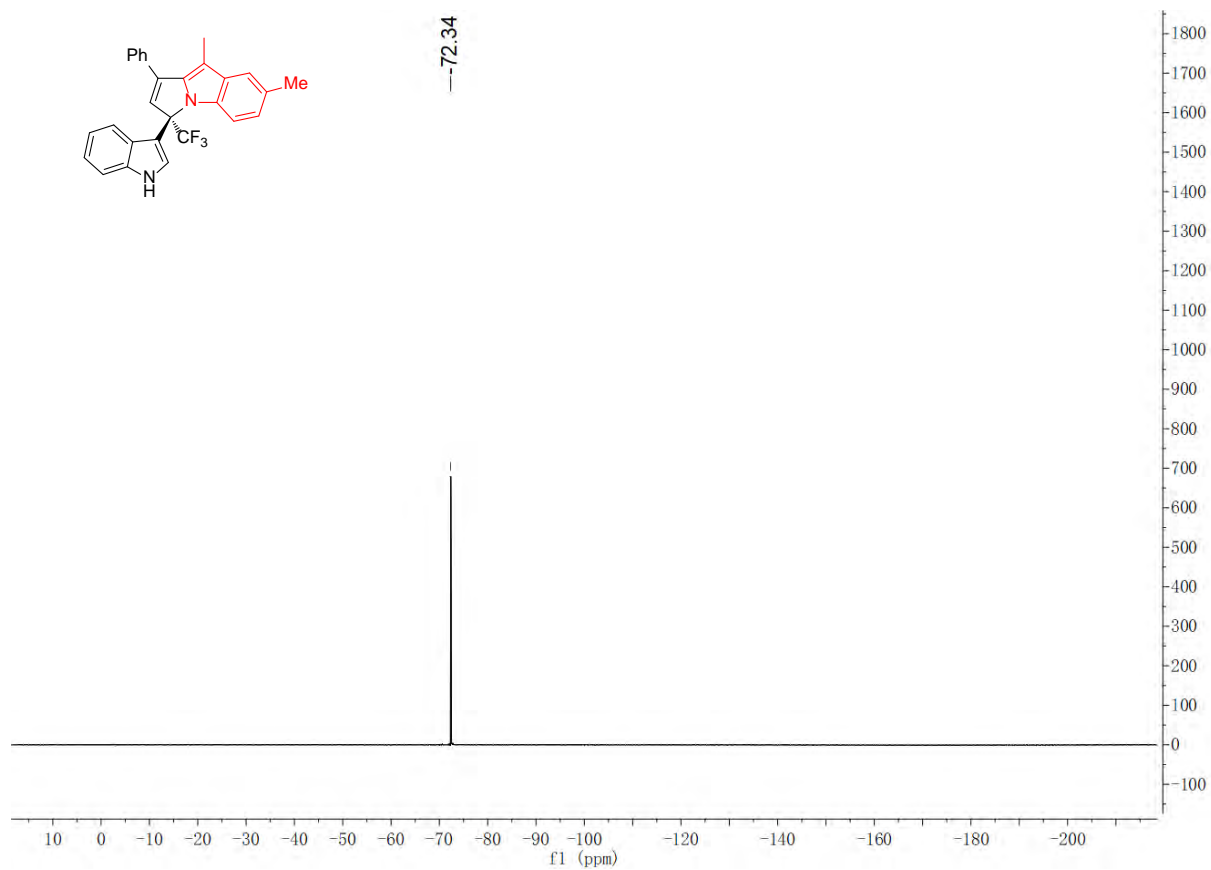

### <sup>1</sup>H NMR of compound 7g (in CDCl<sub>3</sub>)

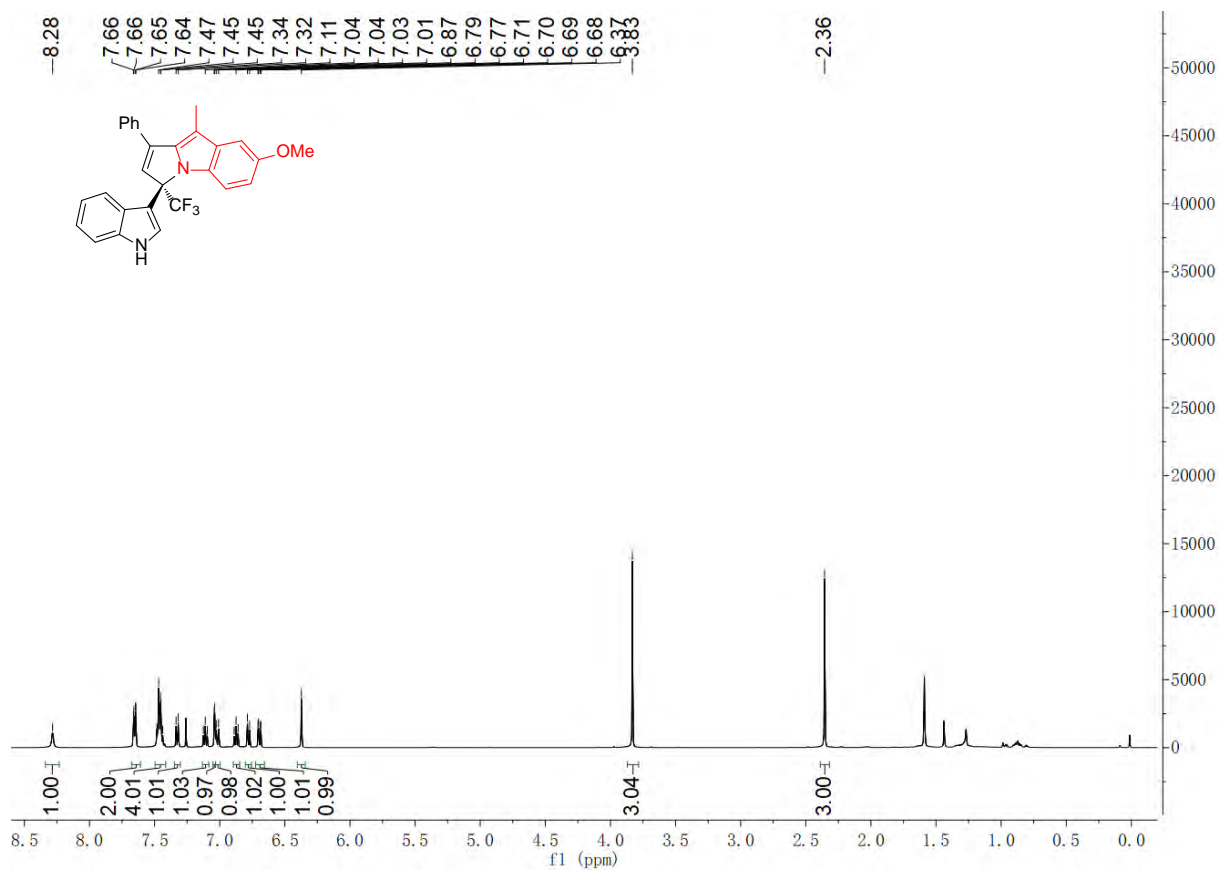

### <sup>13</sup>C NMR of compound 7g (in CDCl<sub>3</sub>)

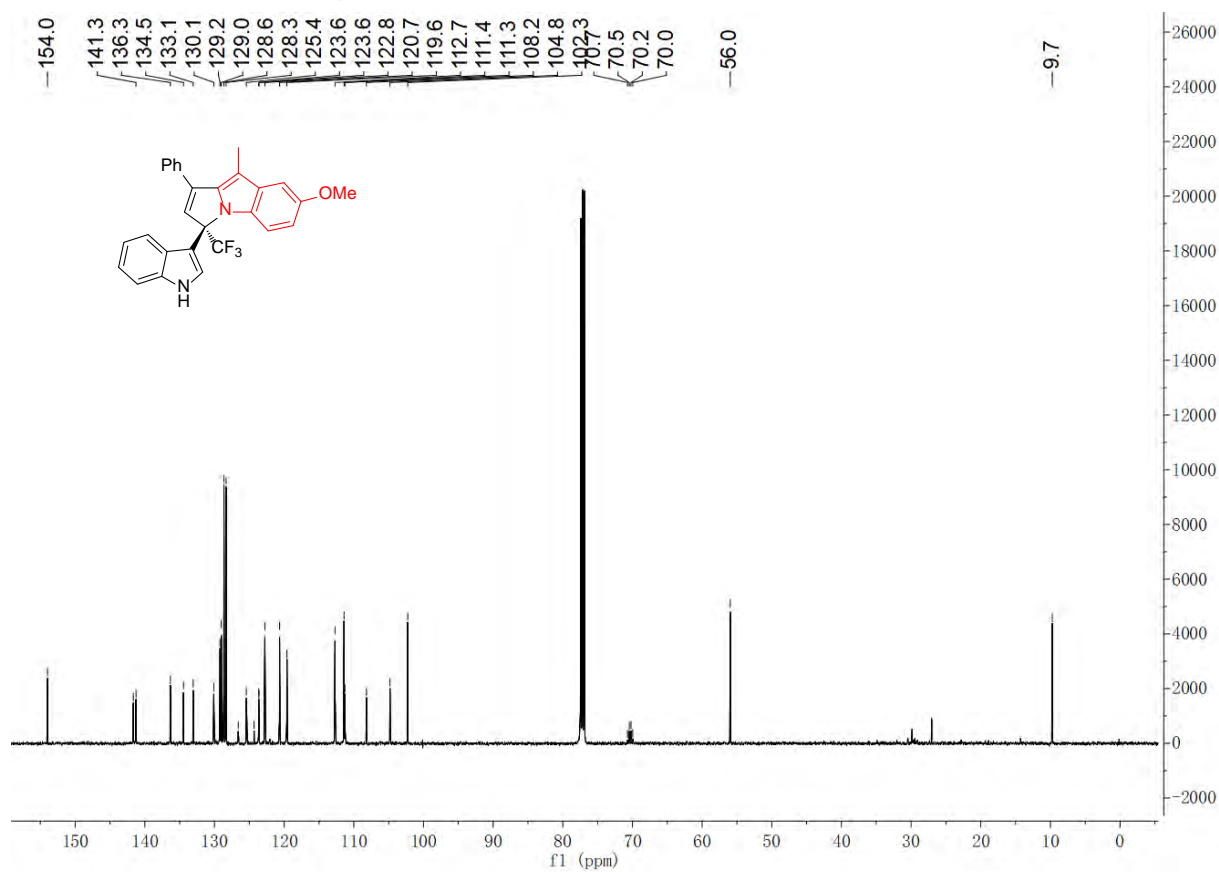

### <sup>19</sup>F NMR of compound 7g (in CDCl<sub>3</sub>)

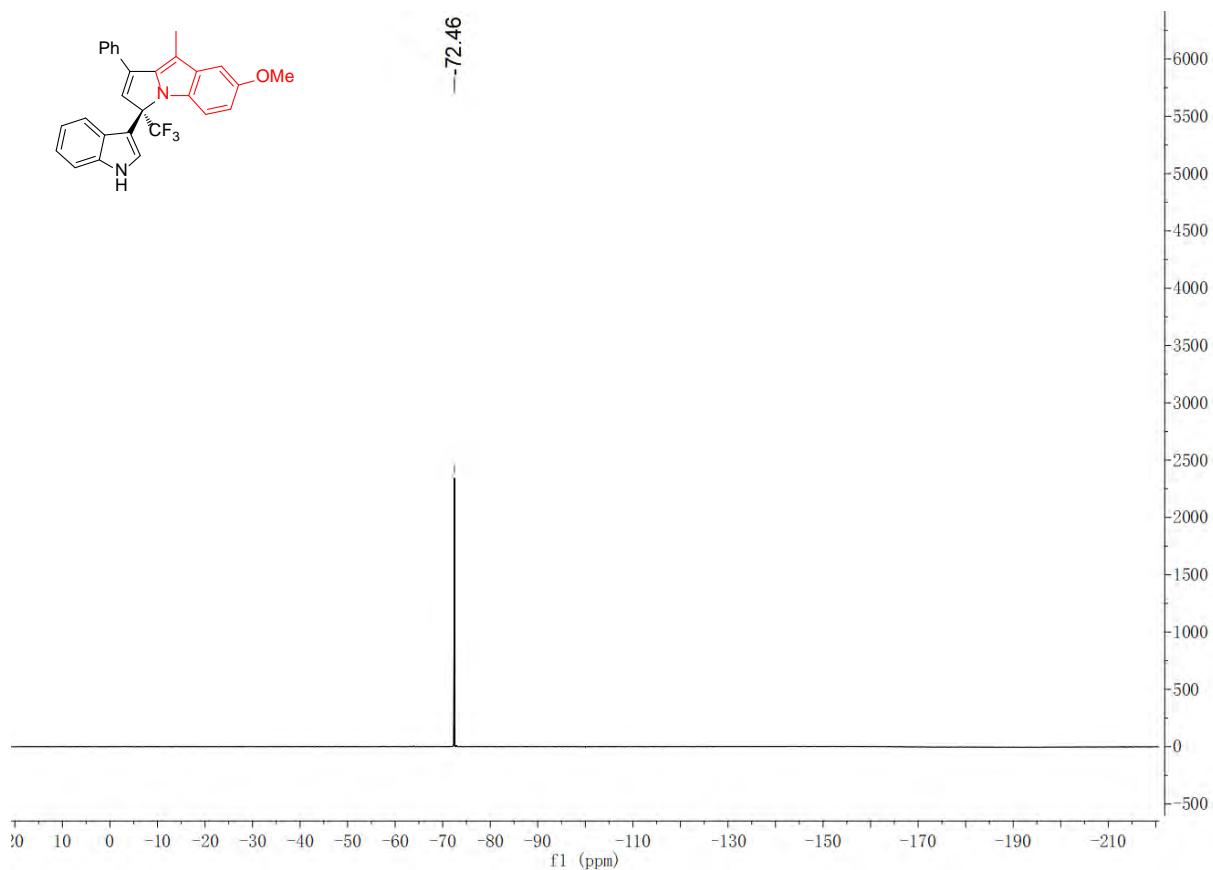

### <sup>1</sup>H NMR of compound 7h (in CDCl<sub>3</sub>)

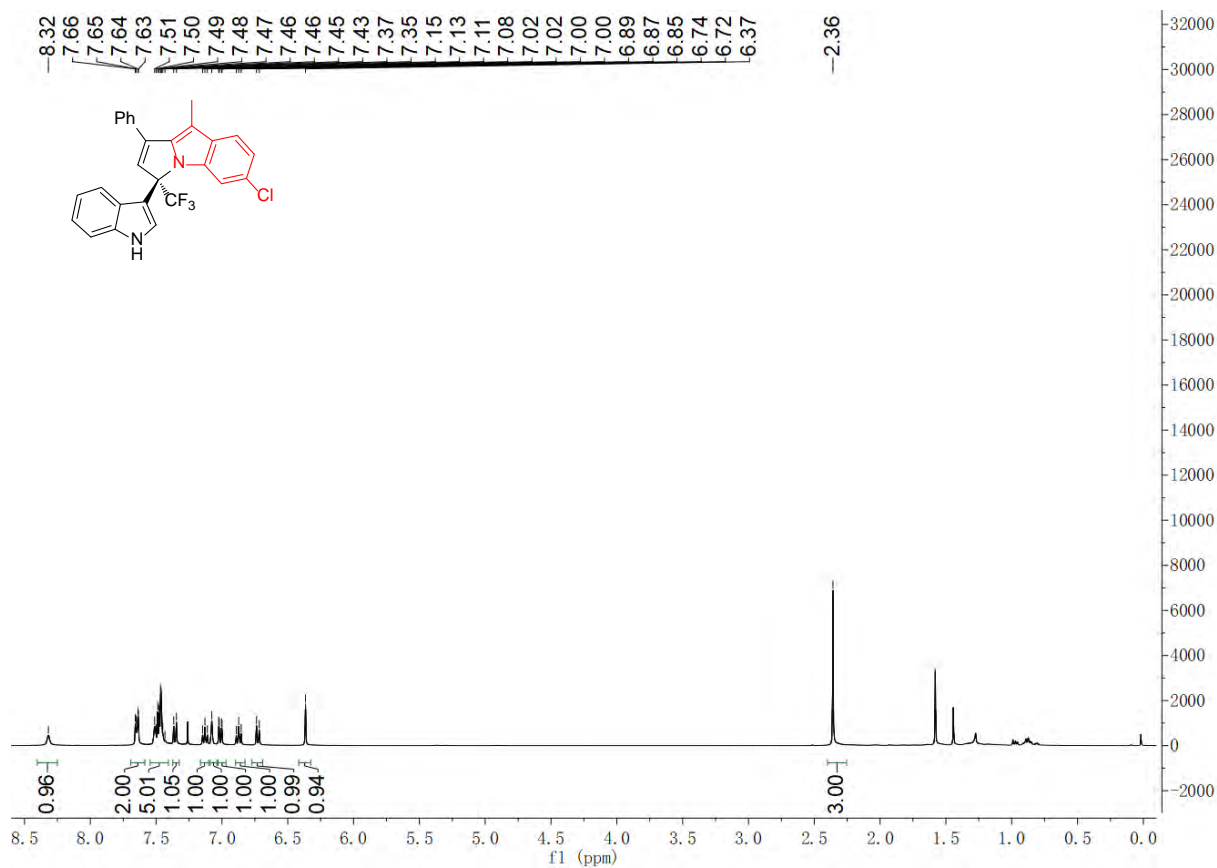

### <sup>13</sup>C NMR of compound 7h (in CDCl<sub>3</sub>)

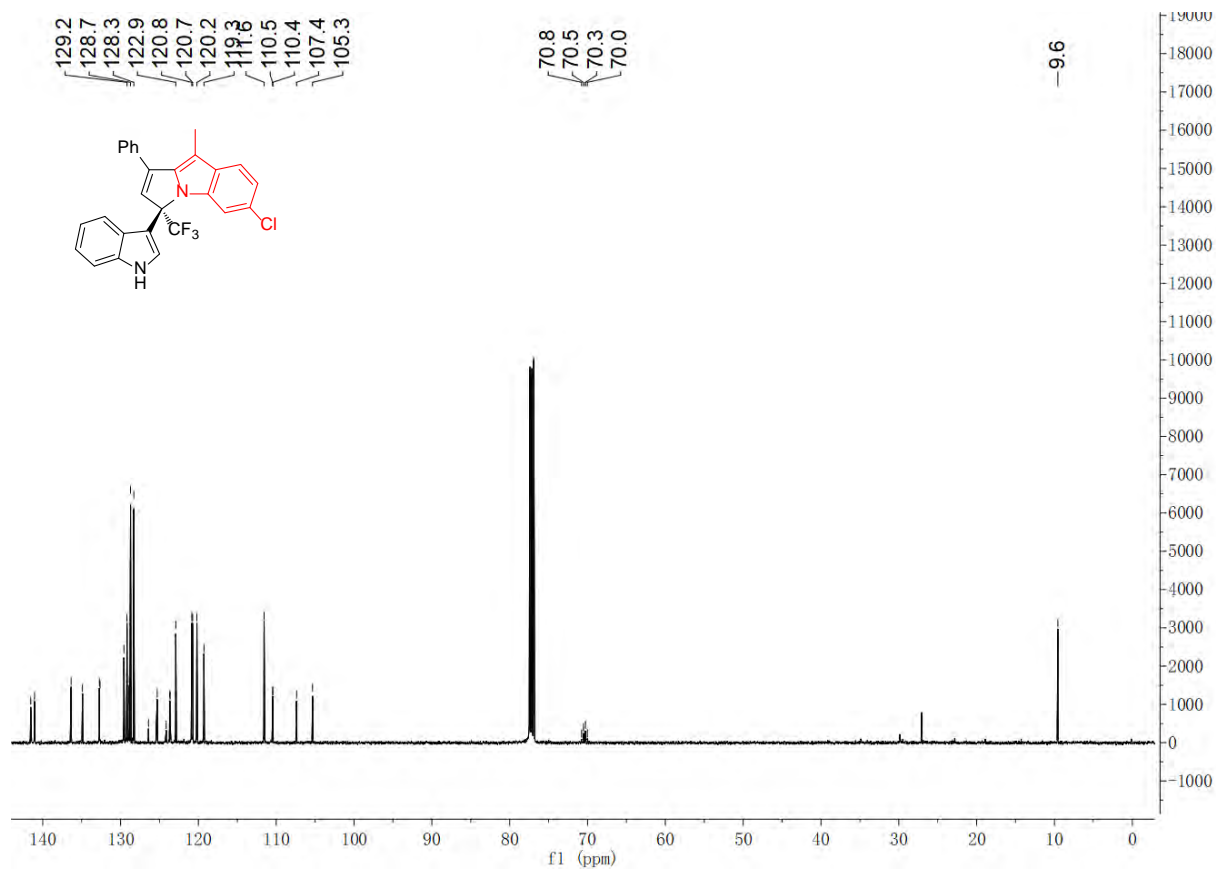

### <sup>19</sup>F NMR of compound 7h (in CDCl<sub>3</sub>)

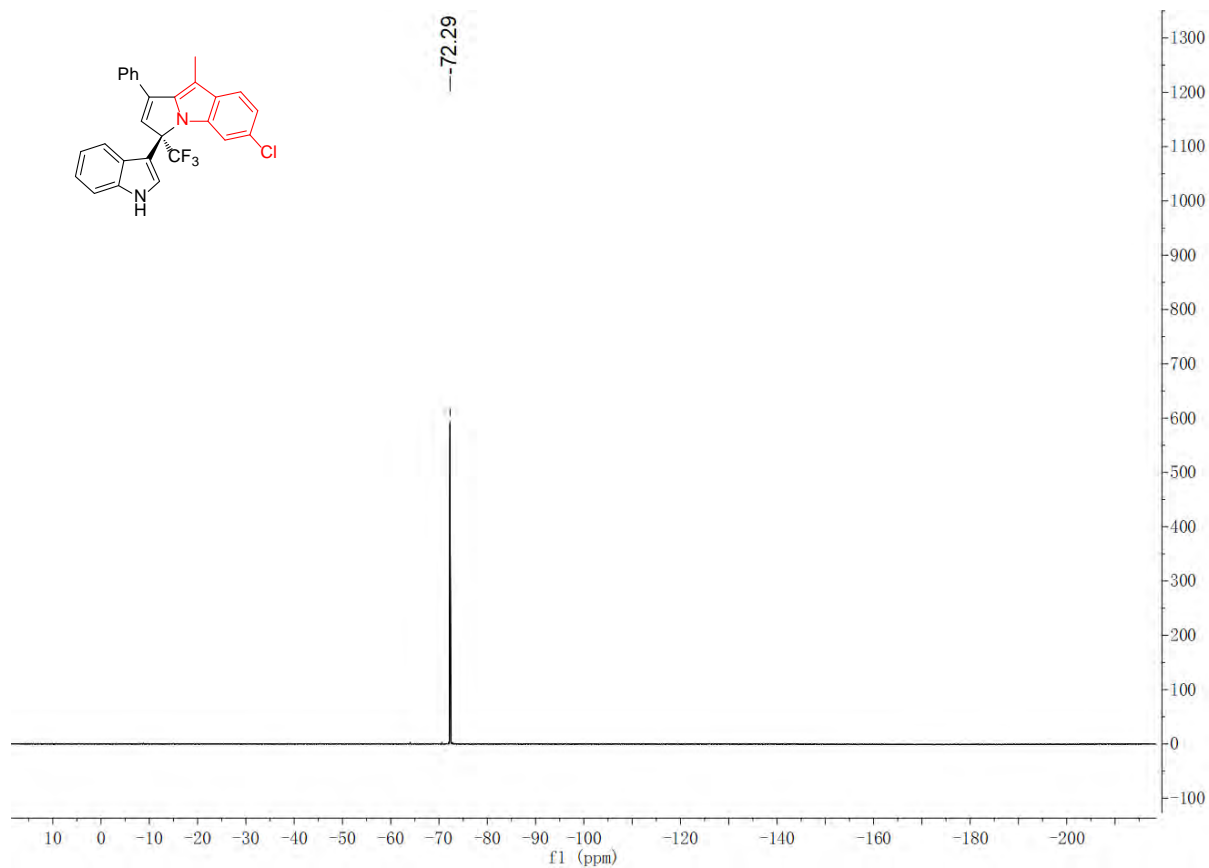

### <sup>1</sup>H NMR of compound 7i (in CDCl<sub>3</sub>)

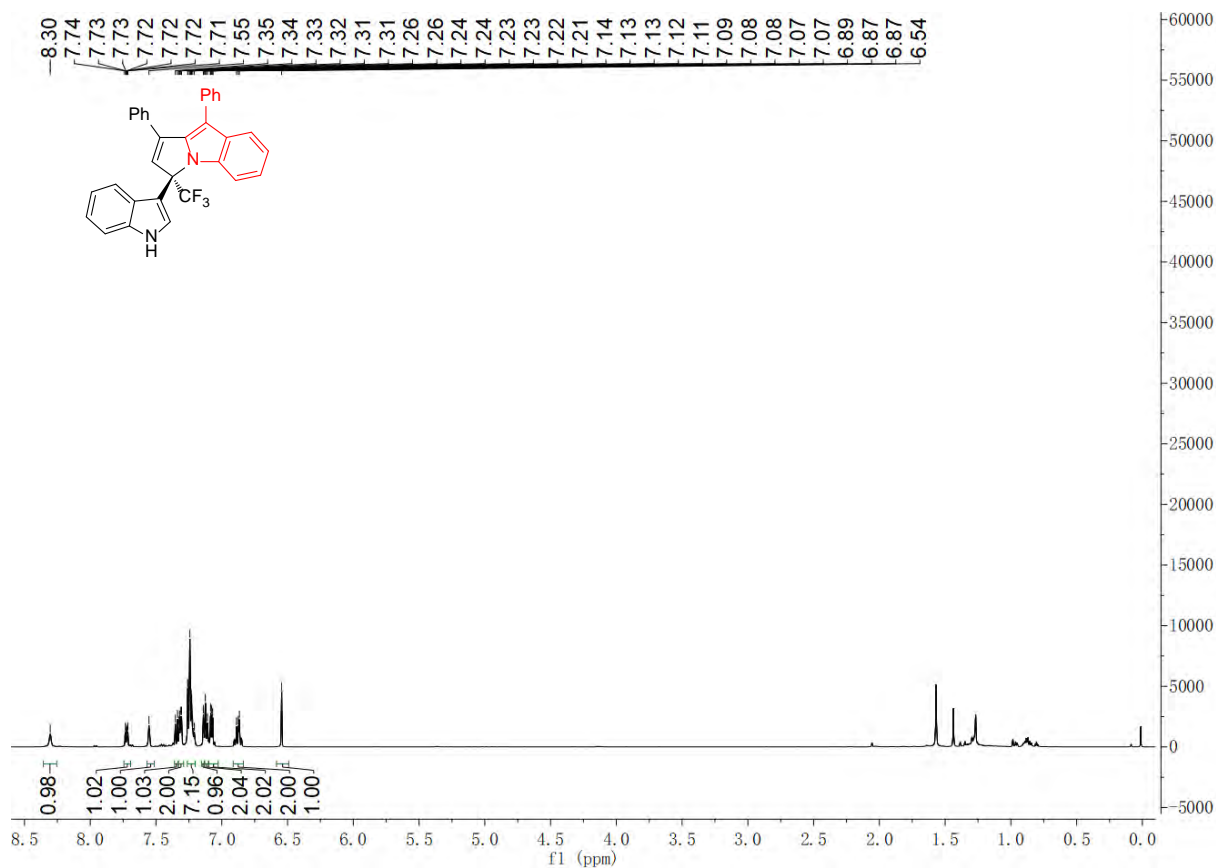

### <sup>13</sup>C NMR of compound 7i (in CDCl<sub>3</sub>)

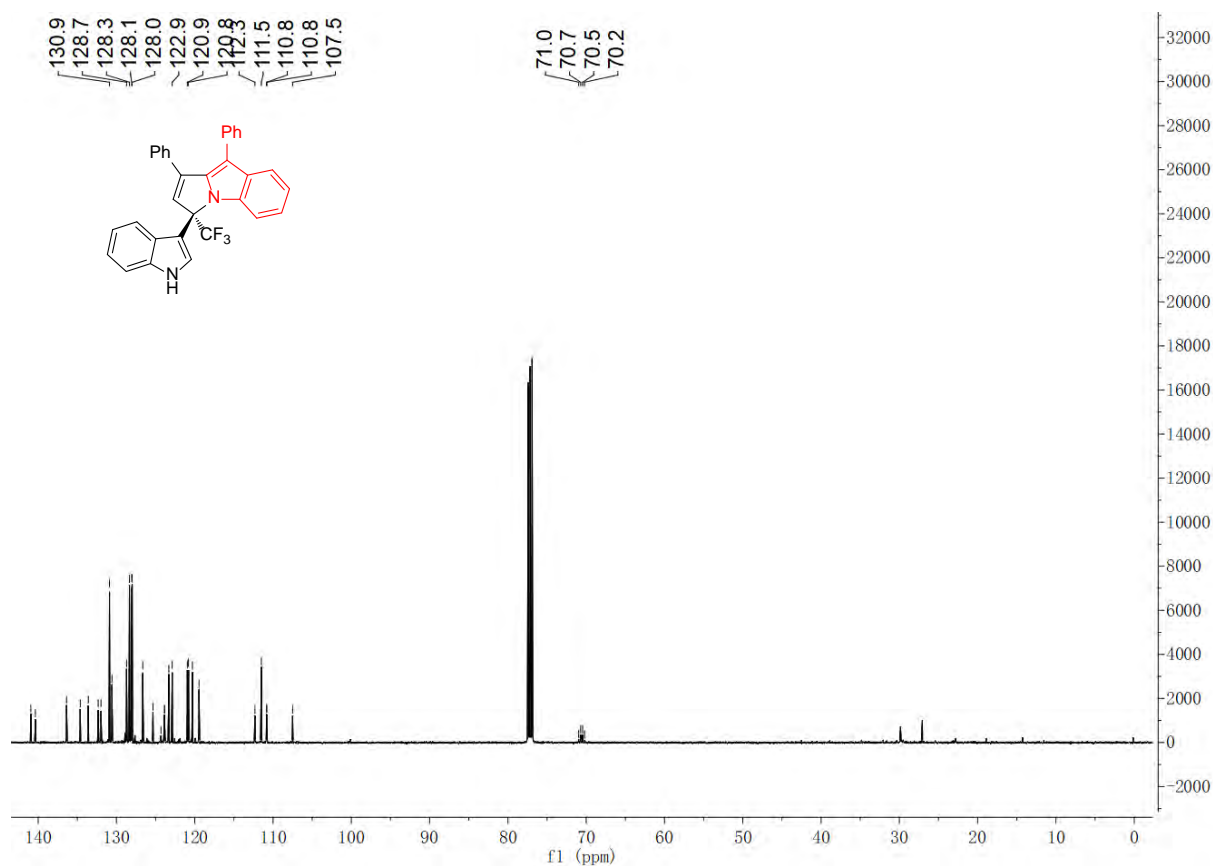

### <sup>19</sup>F NMR of compound 7i (in CDCl<sub>3</sub>)

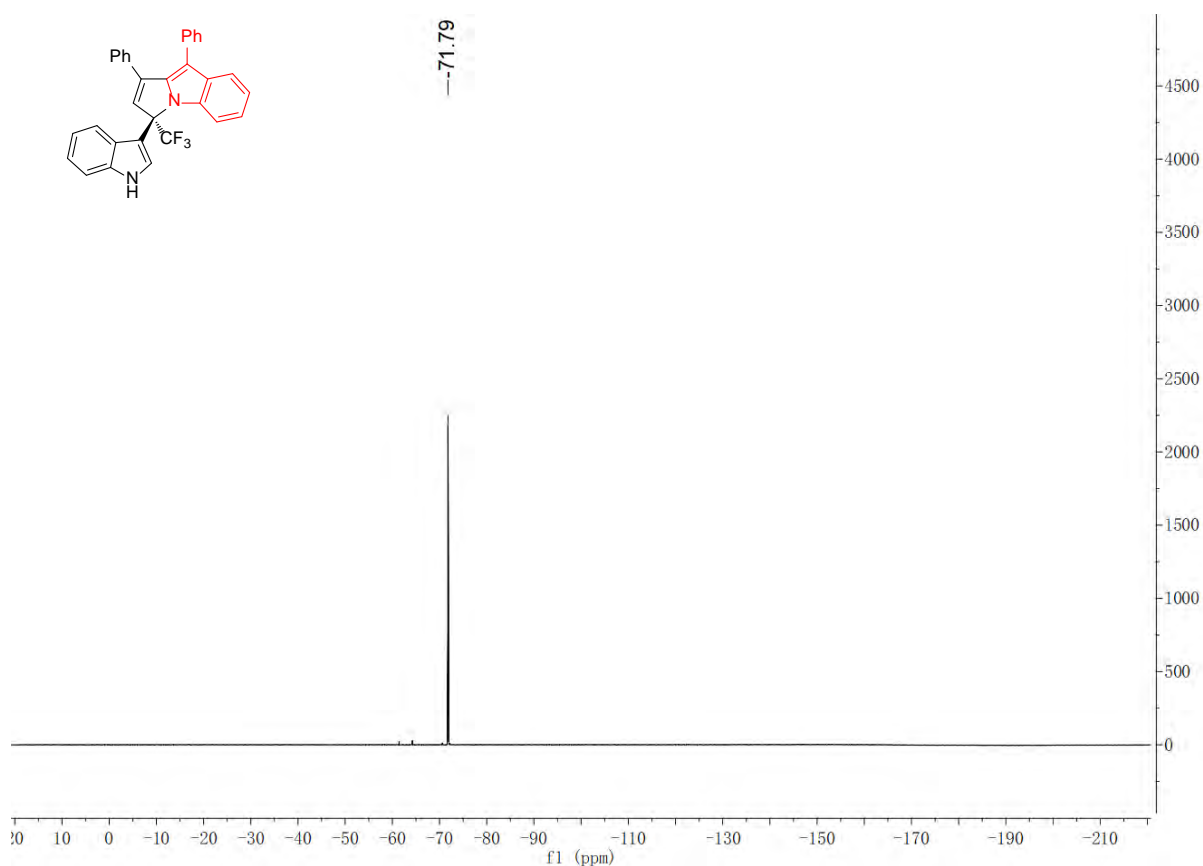

### <sup>1</sup>H NMR of compound 7j (in CDCl<sub>3</sub>)

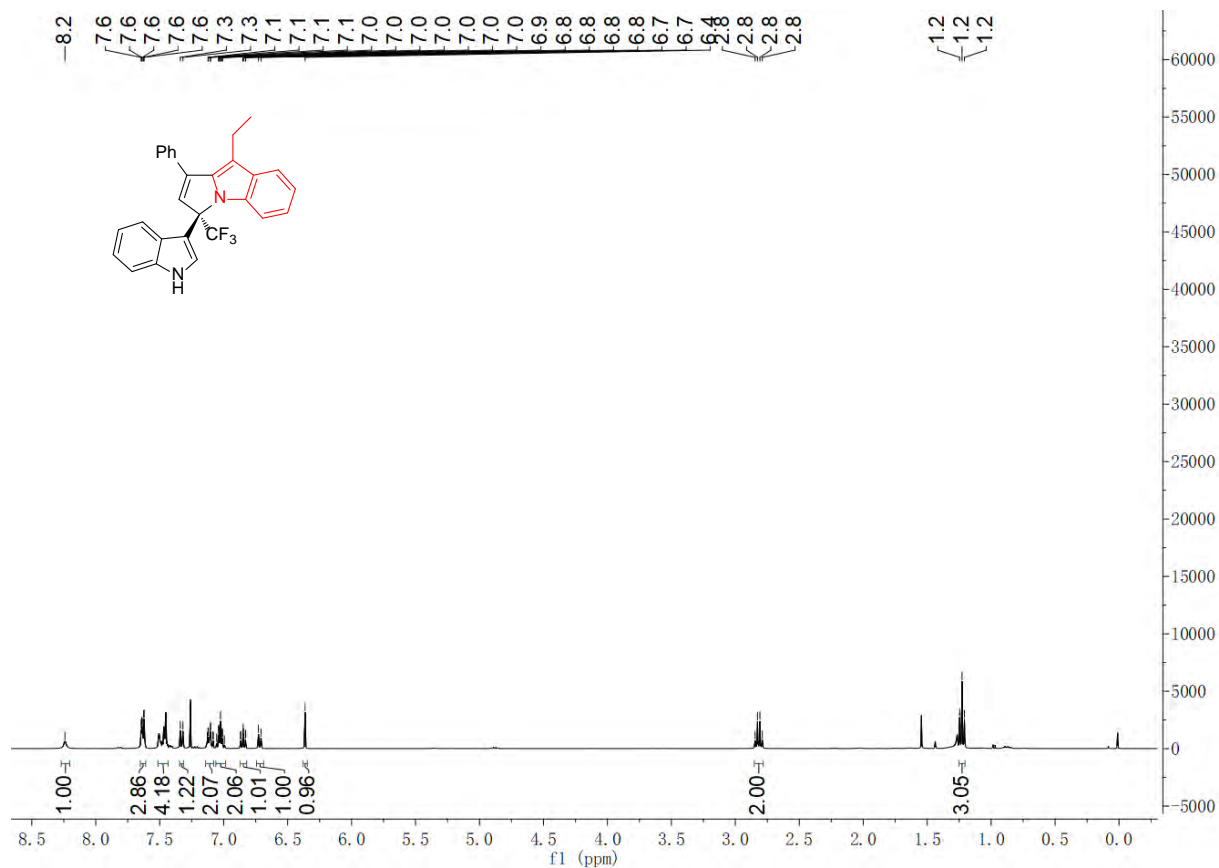

**<sup>13</sup>C NMR of compound 7j (in CDCl<sub>3</sub>)**

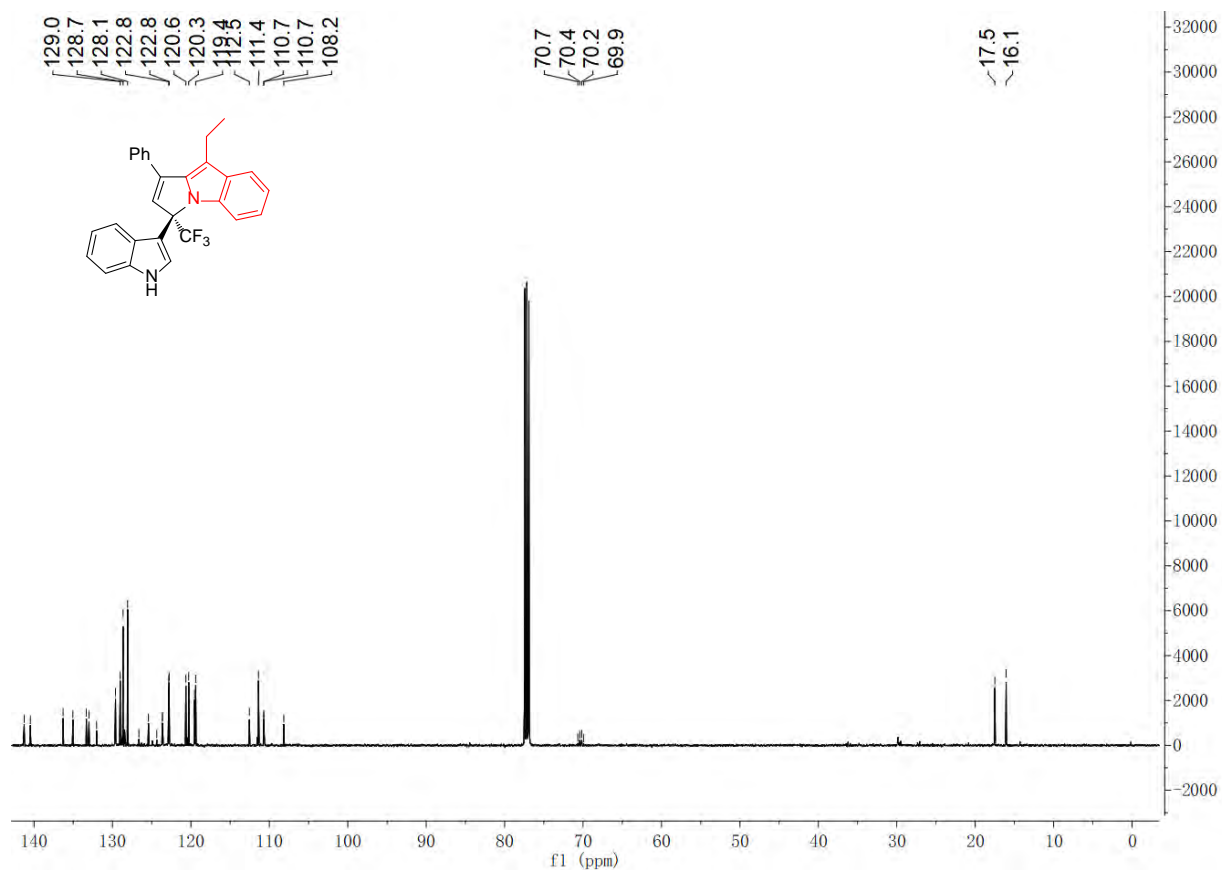

**<sup>19</sup>F NMR of compound 7j (in CDCl<sub>3</sub>)**

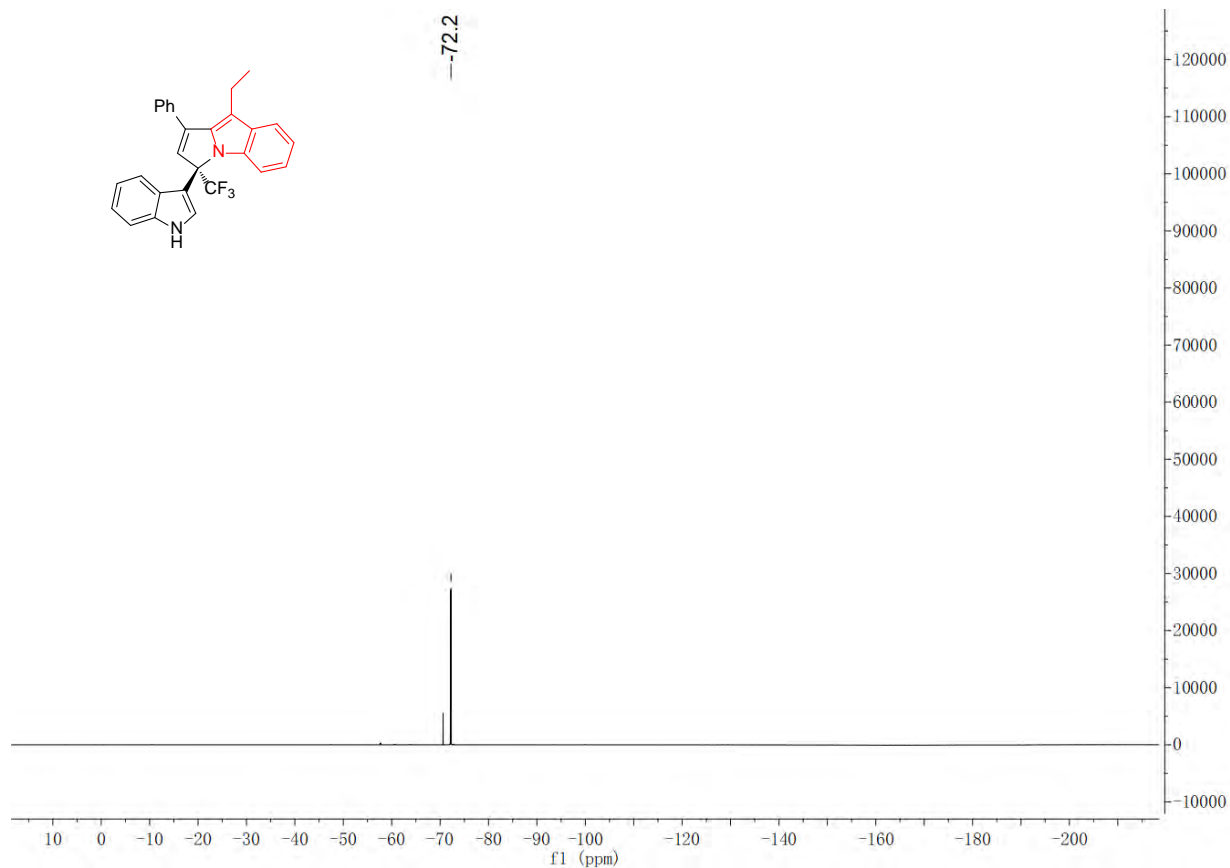

### <sup>1</sup>H NMR of compound 7k (in CDCl<sub>3</sub>)

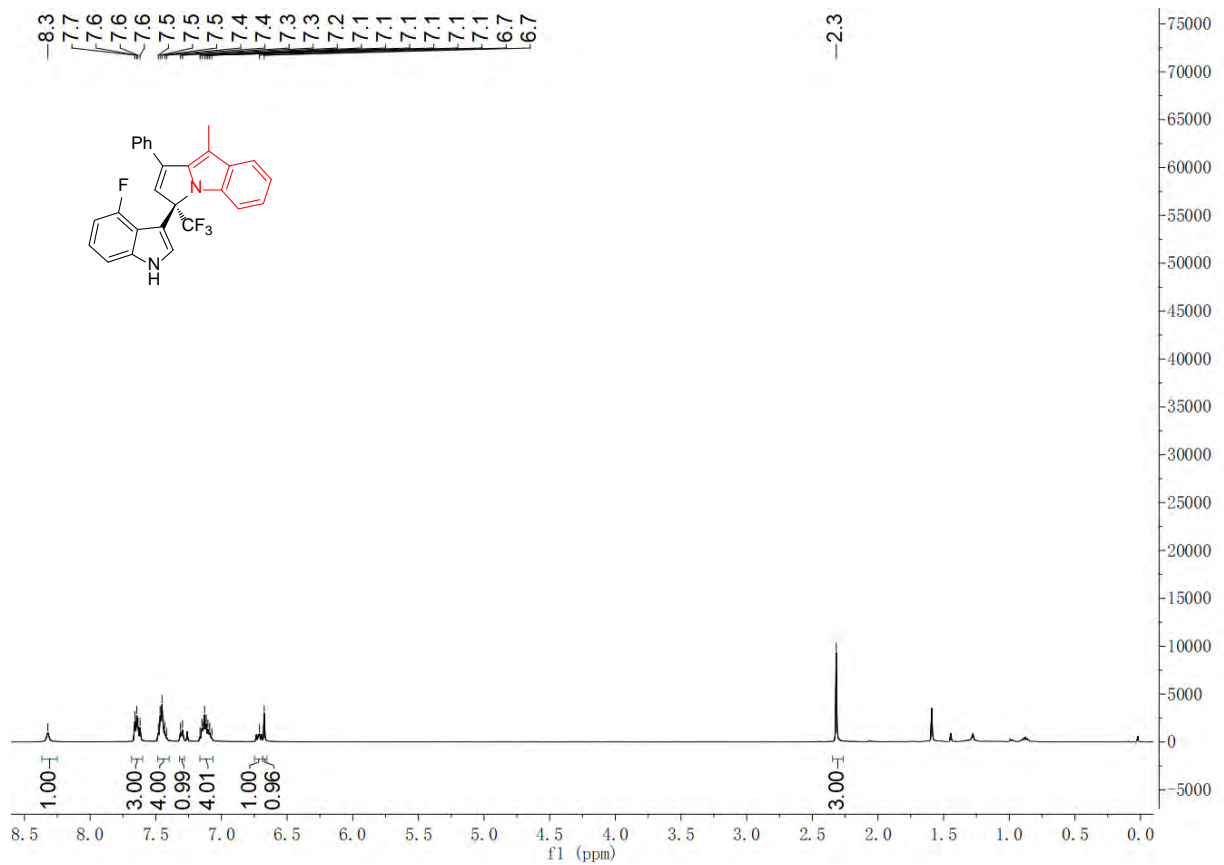

### <sup>13</sup>C NMR of compound 7k (in CDCl<sub>3</sub>)

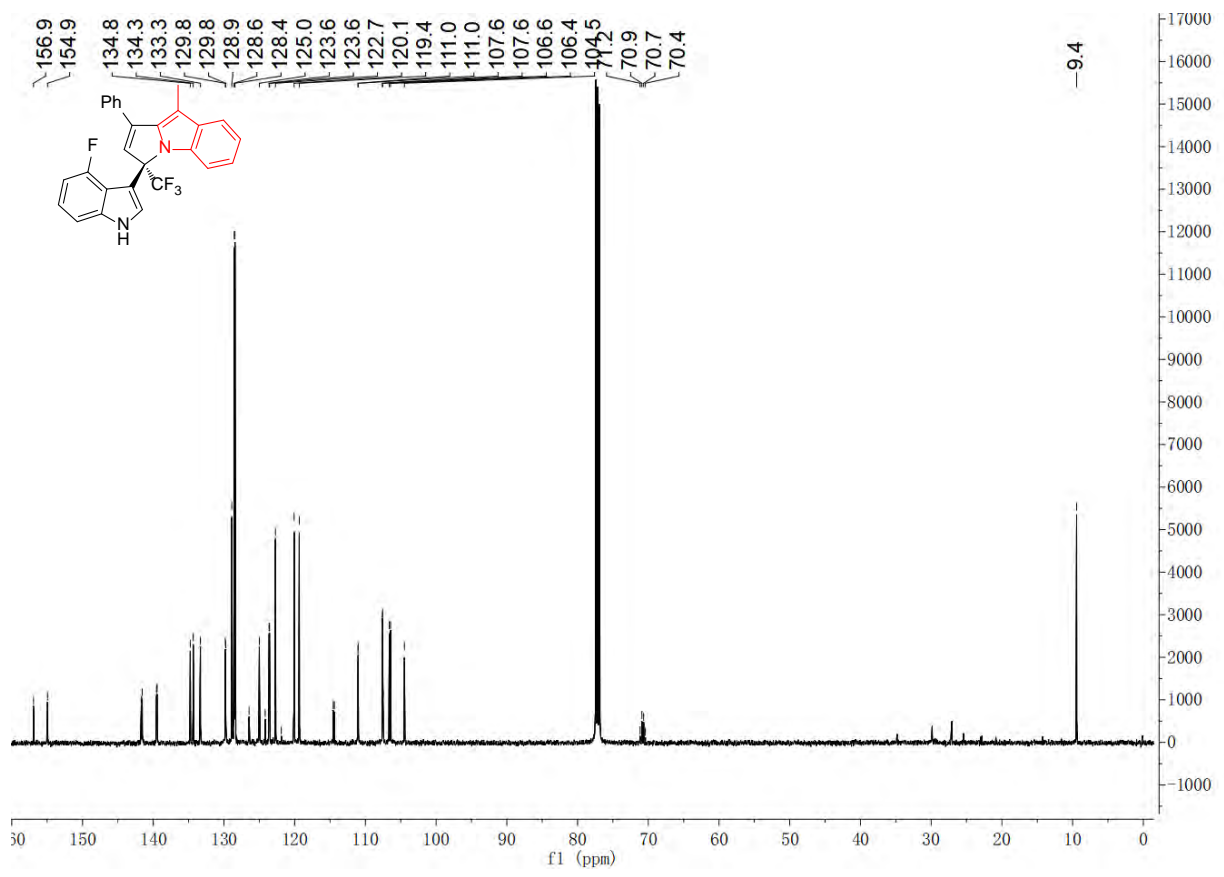



### <sup>19</sup>F NMR of compound 7k (in CDCl<sub>3</sub>)

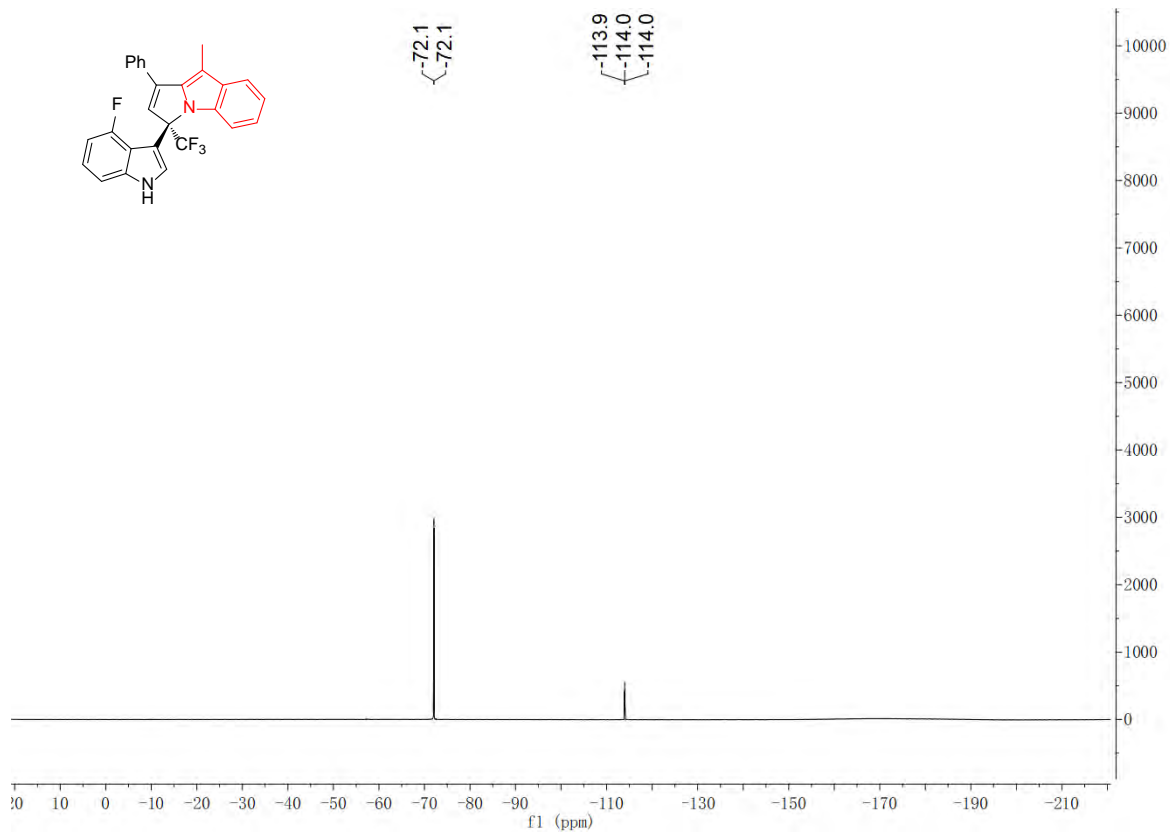

### <sup>1</sup>H NMR of compound 7l (in CDCl<sub>3</sub>)

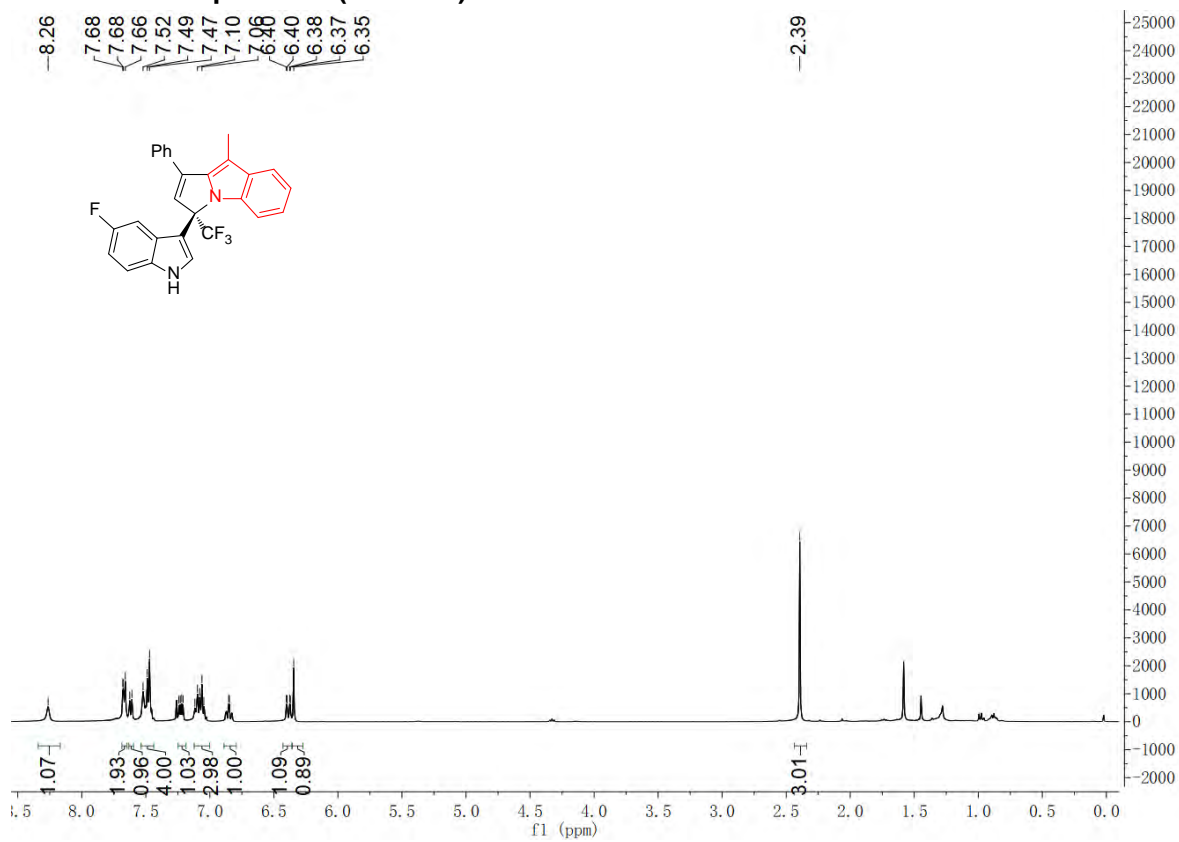

### <sup>13</sup>C NMR of compound 7I (in CDCl<sub>3</sub>)

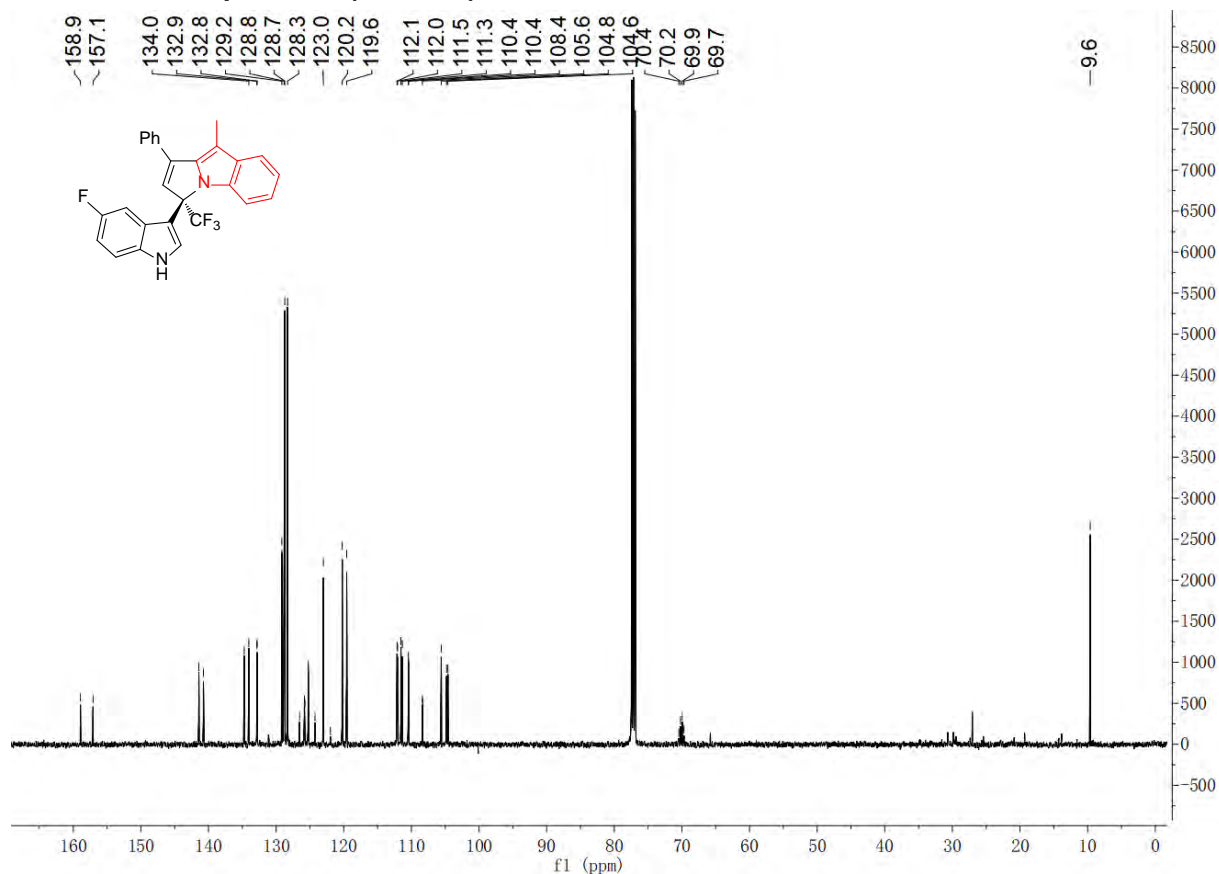

### <sup>19</sup>F NMR of compound 7I (in CDCl<sub>3</sub>)

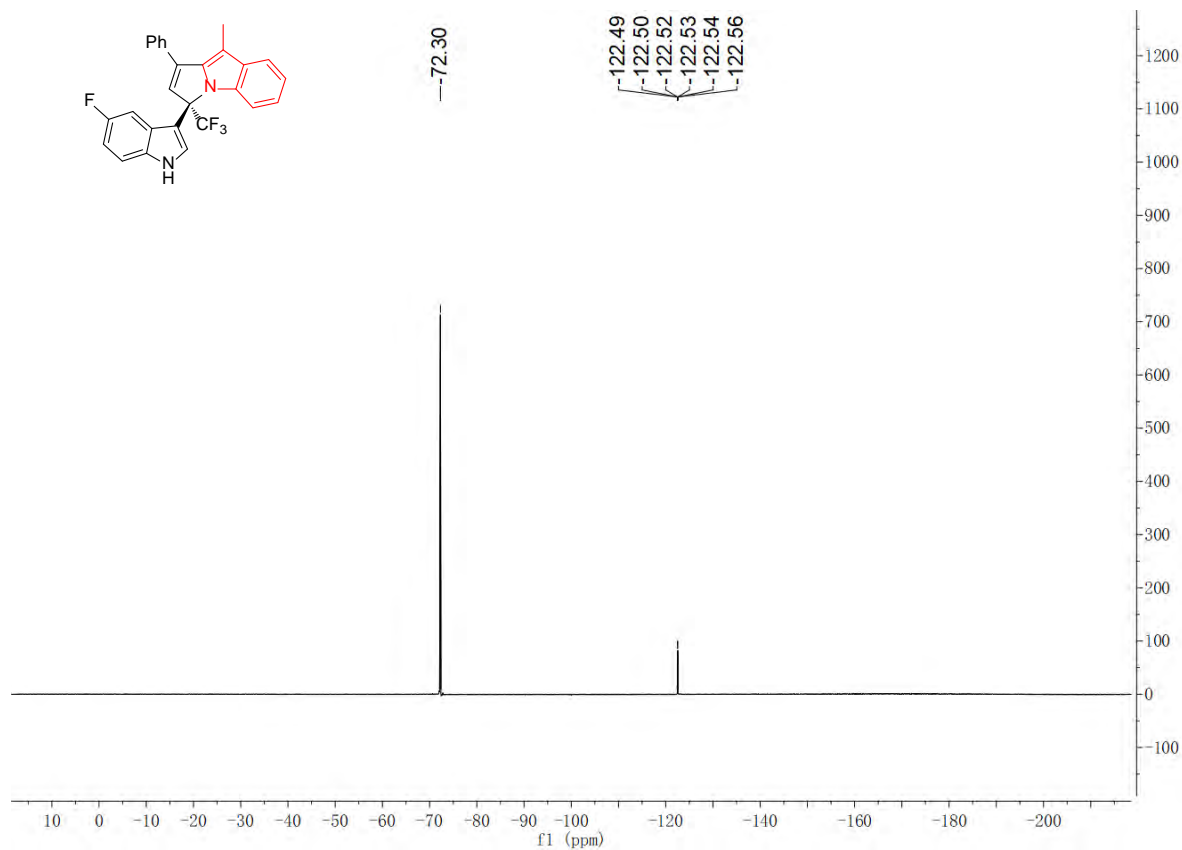

### <sup>1</sup>H NMR of compound 7m (in CDCl<sub>3</sub>)

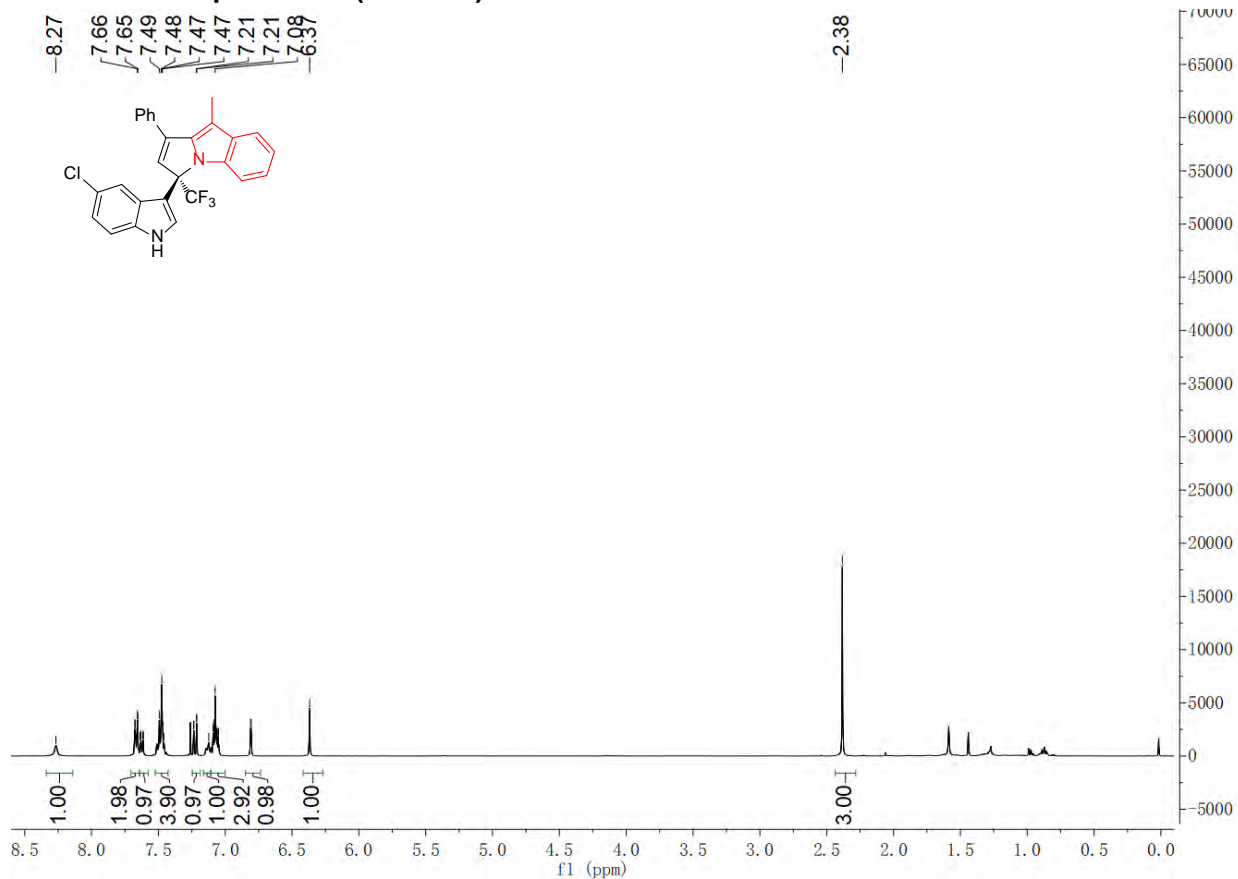

### <sup>13</sup>C NMR of compound 7m (in CDCl<sub>3</sub>)

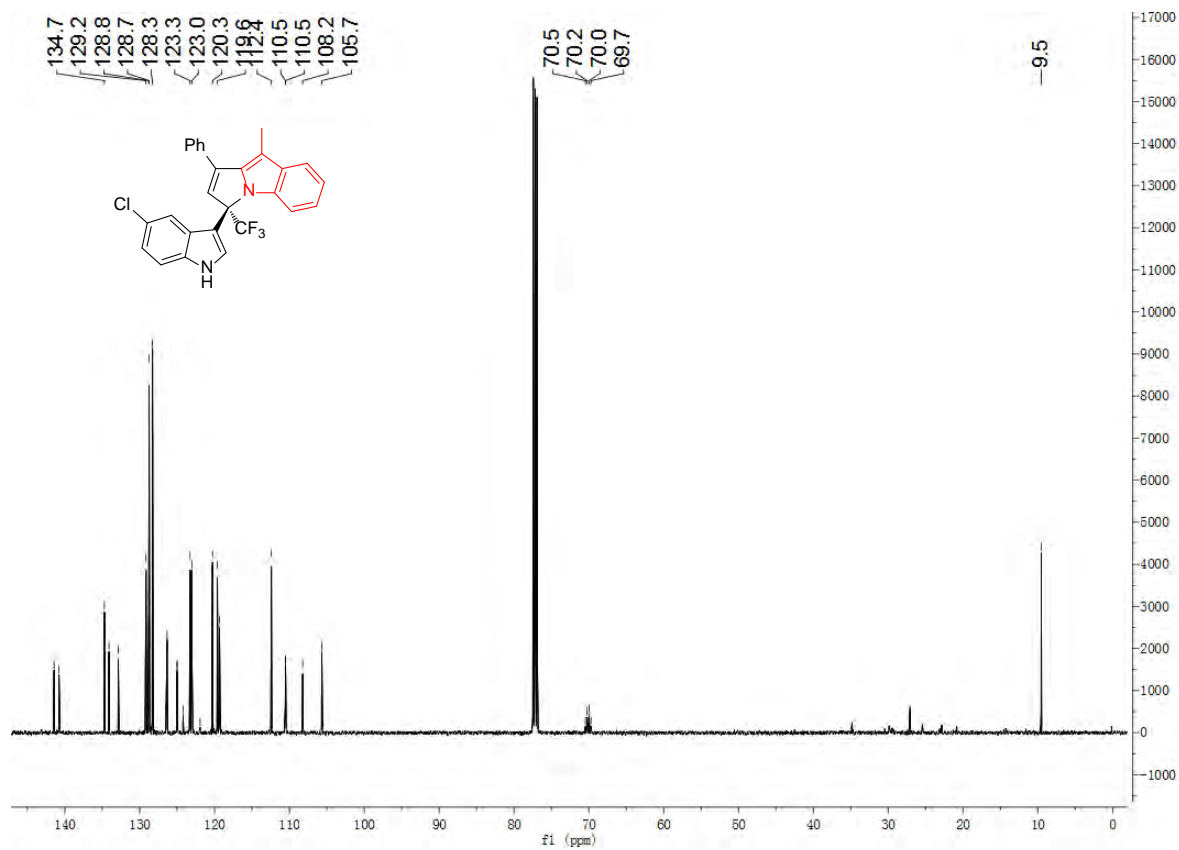

**<sup>19</sup>F NMR of compound 7m (in CDCl<sub>3</sub>)**

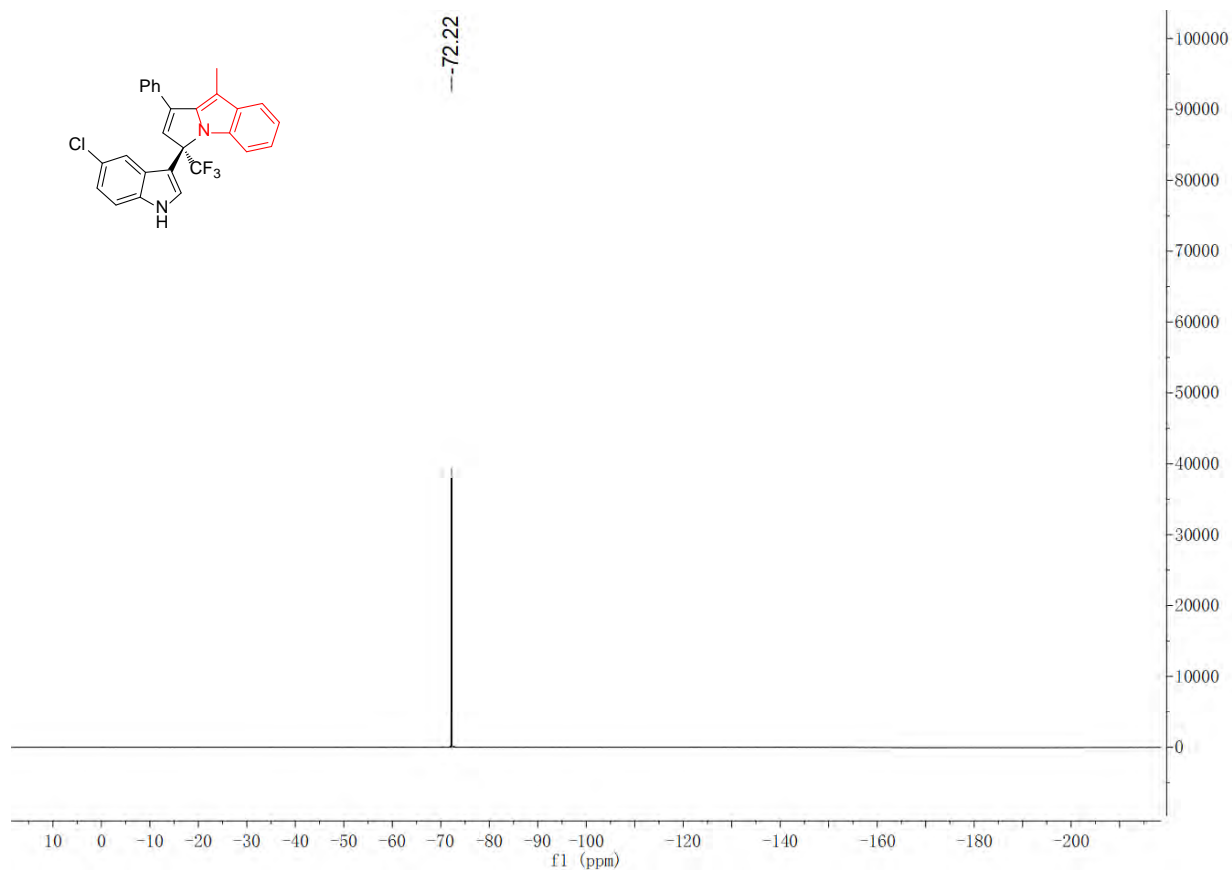

**<sup>1</sup>H NMR of compound 7n (in CDCl<sub>3</sub>)**

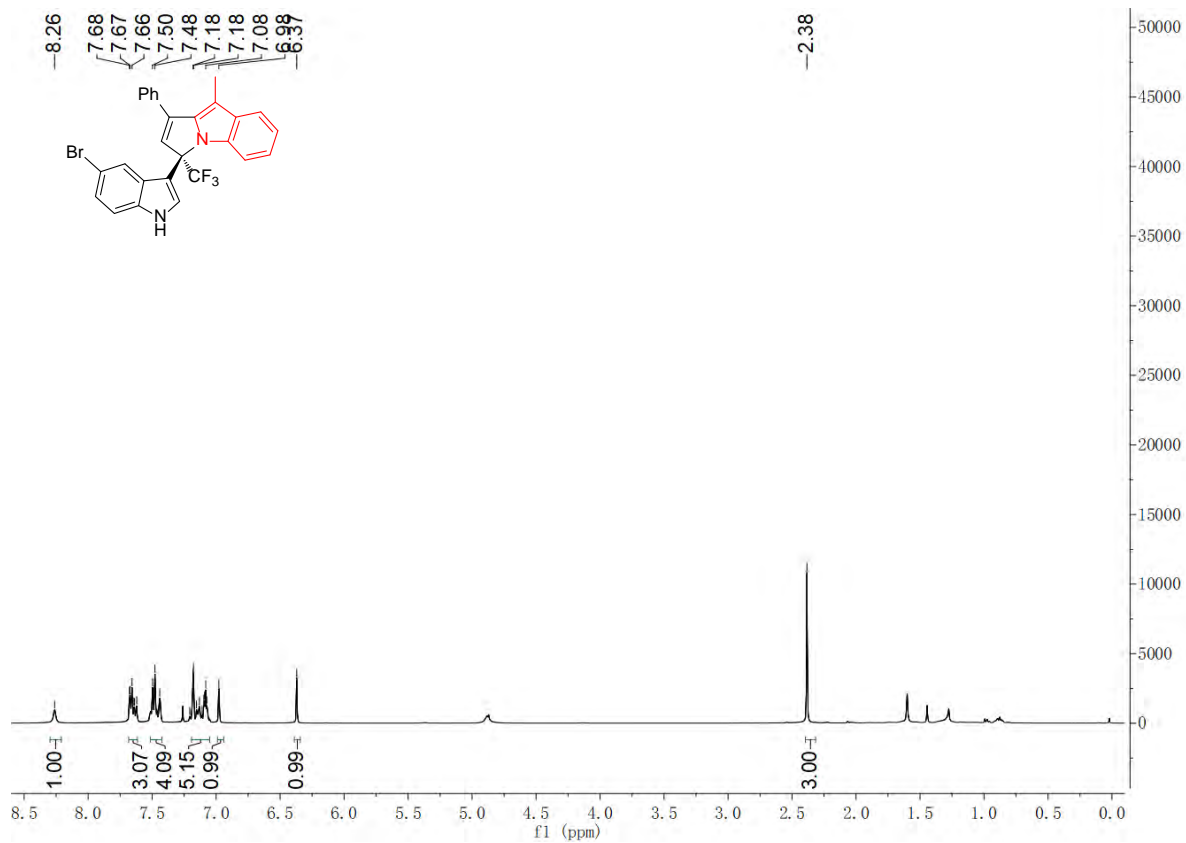

### <sup>13</sup>C NMR of compound 7n (in CDCl<sub>3</sub>)

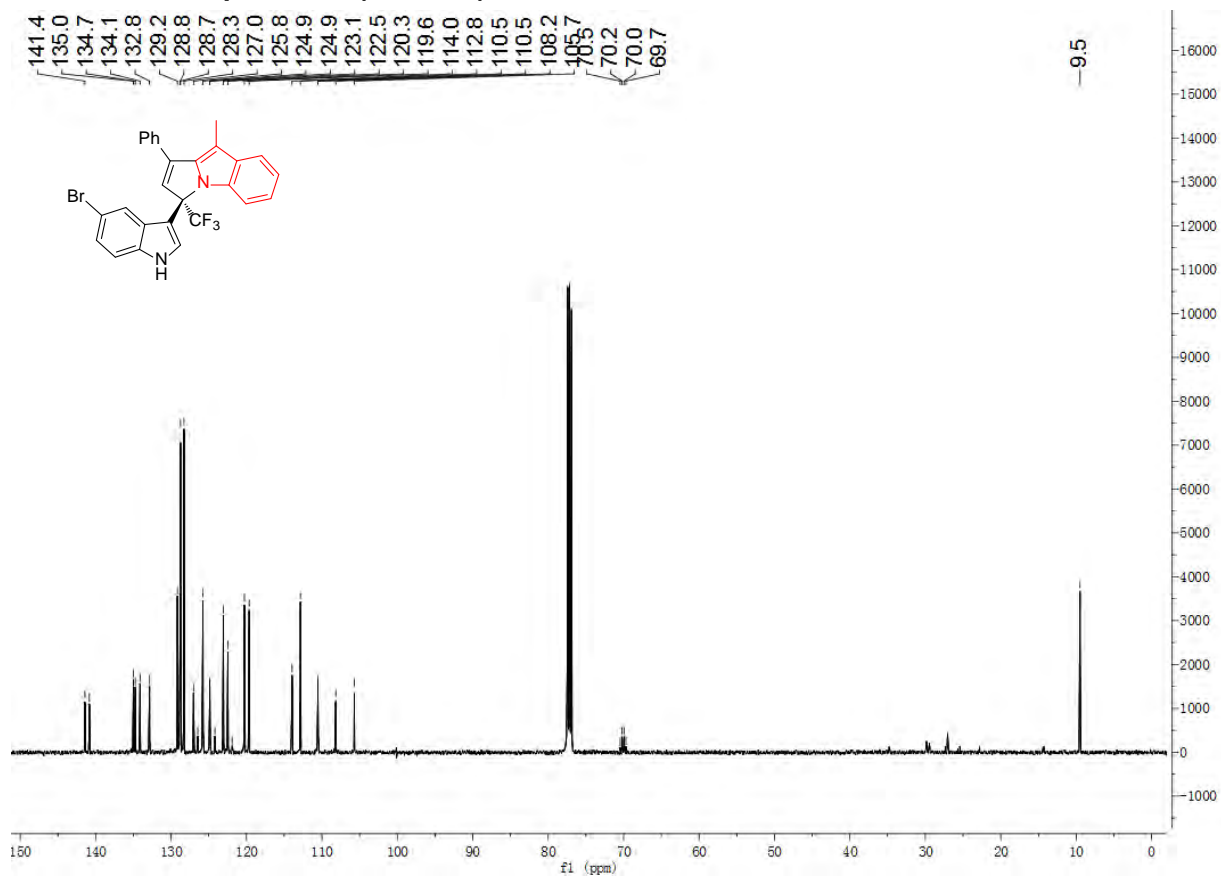

### <sup>19</sup>F NMR of compound 7n (in CDCl<sub>3</sub>)

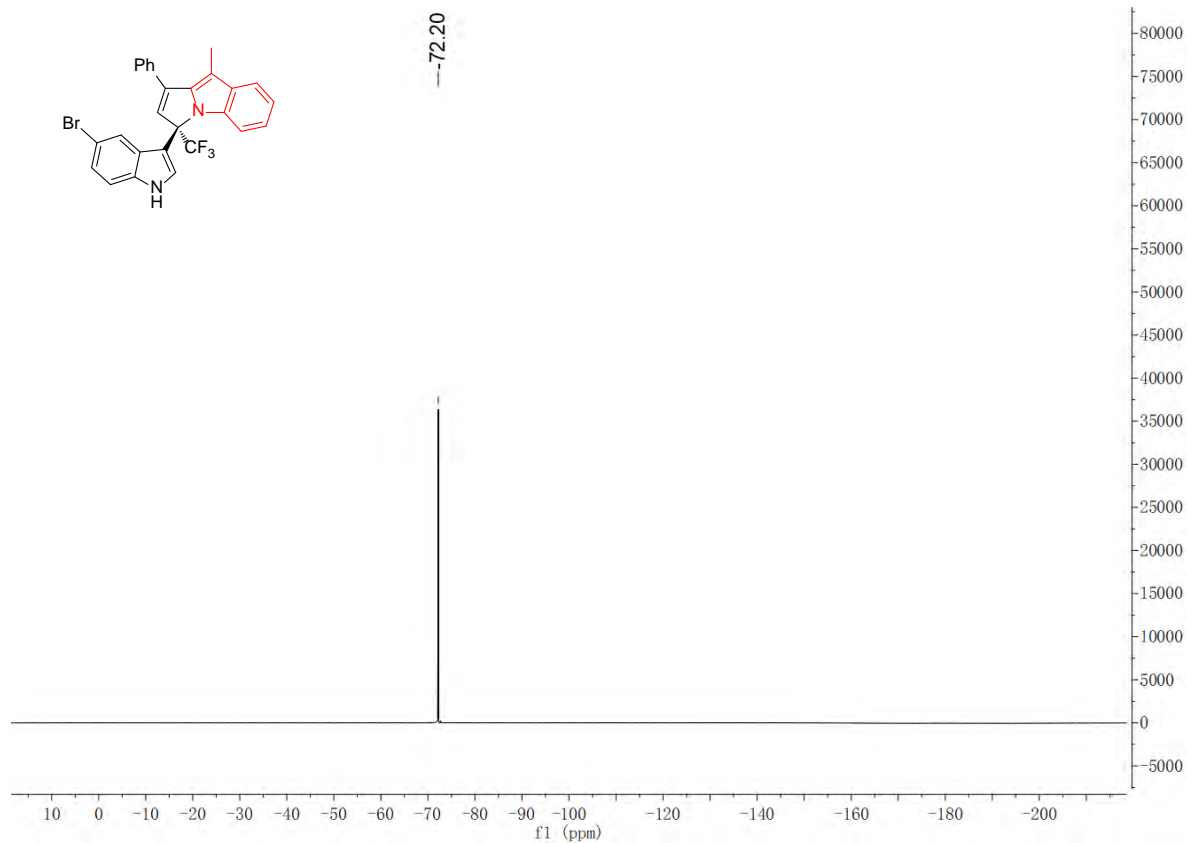

### <sup>1</sup>H NMR of compound 7o (in CDCl<sub>3</sub>)

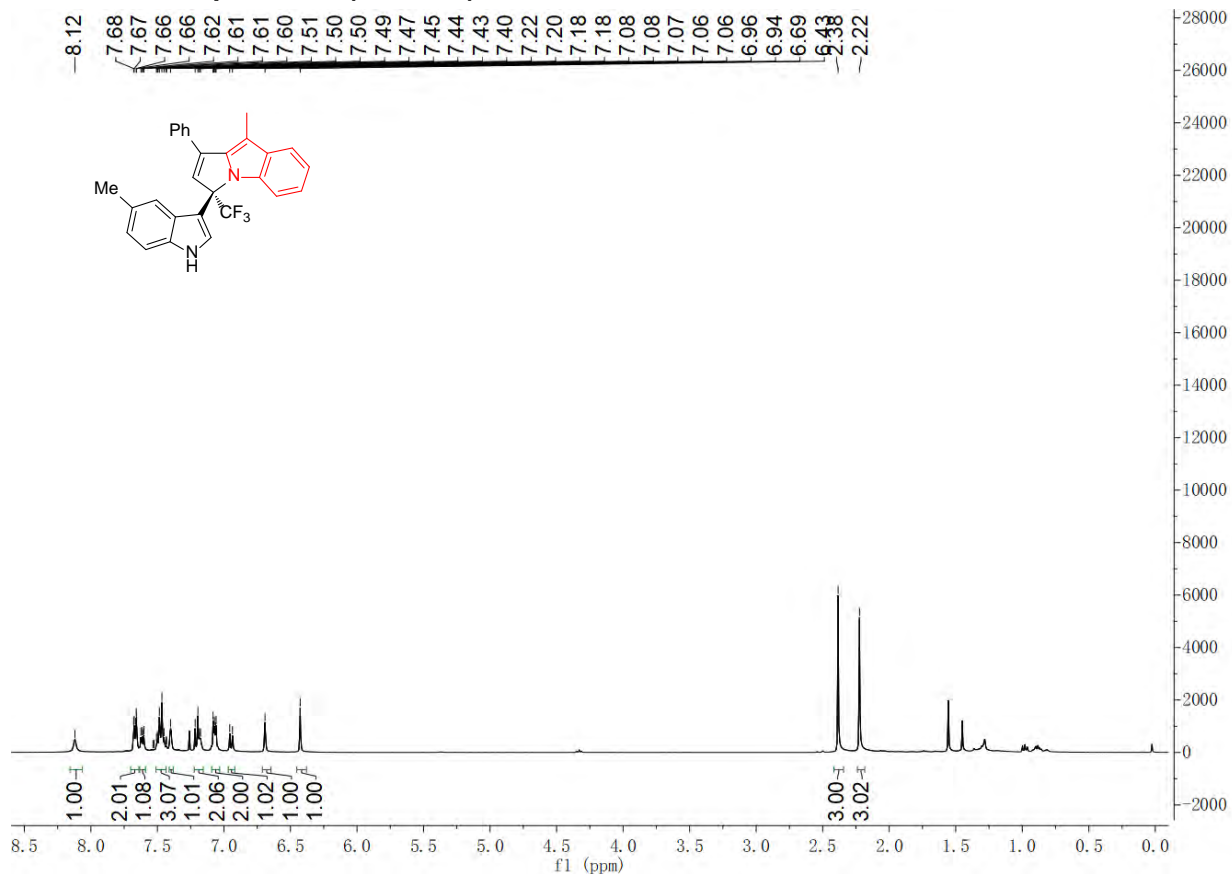

### <sup>13</sup>C NMR of compound 7o (in CDCl<sub>3</sub>)

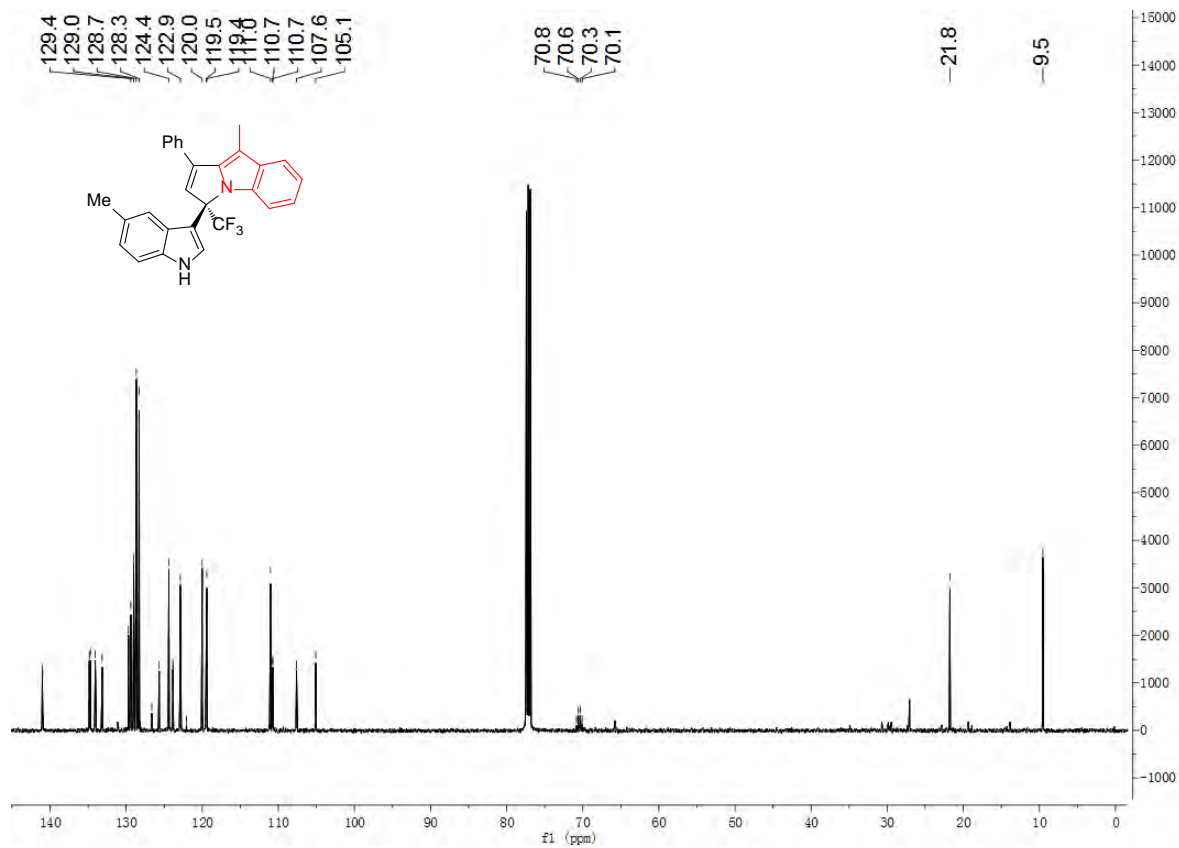

### <sup>19</sup>F NMR of compound 7o (in CDCl<sub>3</sub>)

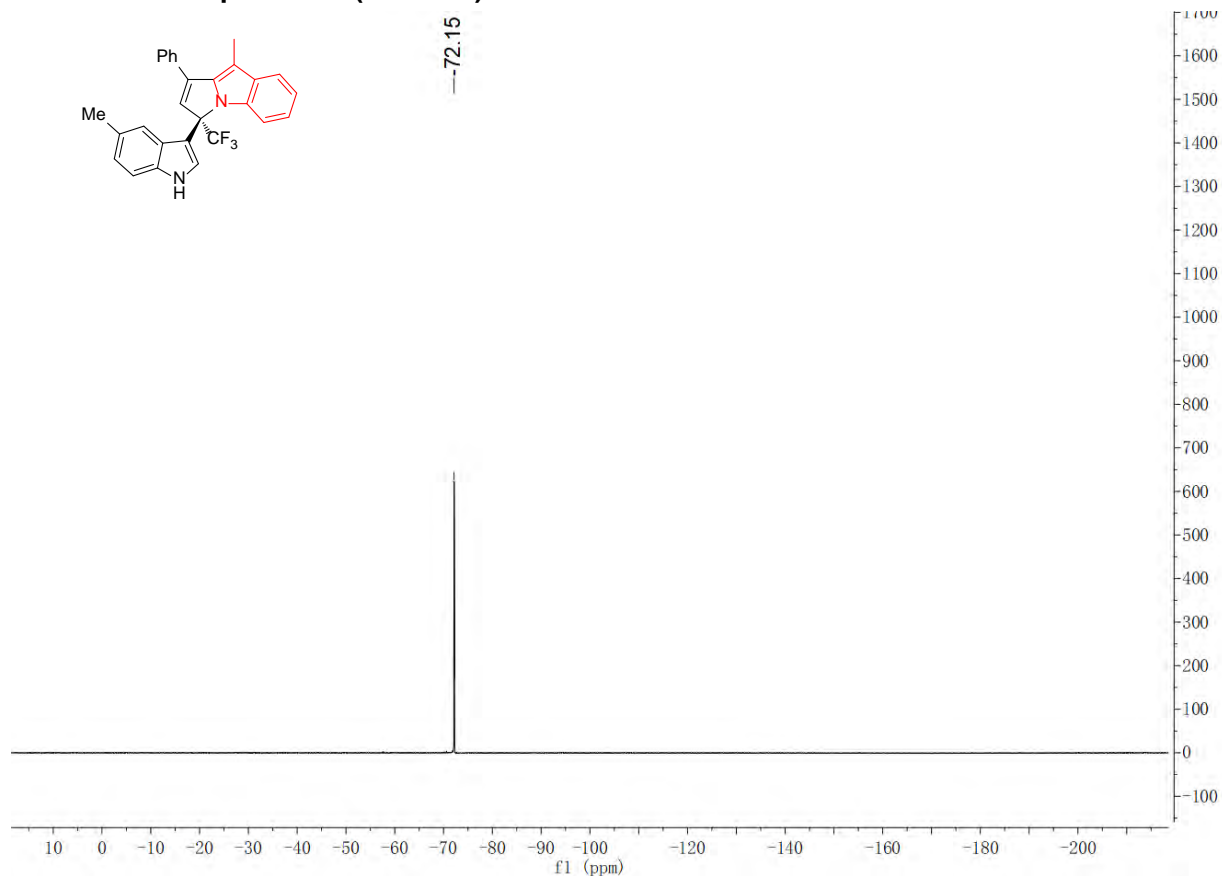

### <sup>1</sup>H NMR of compound 7p (in CDCl<sub>3</sub>)

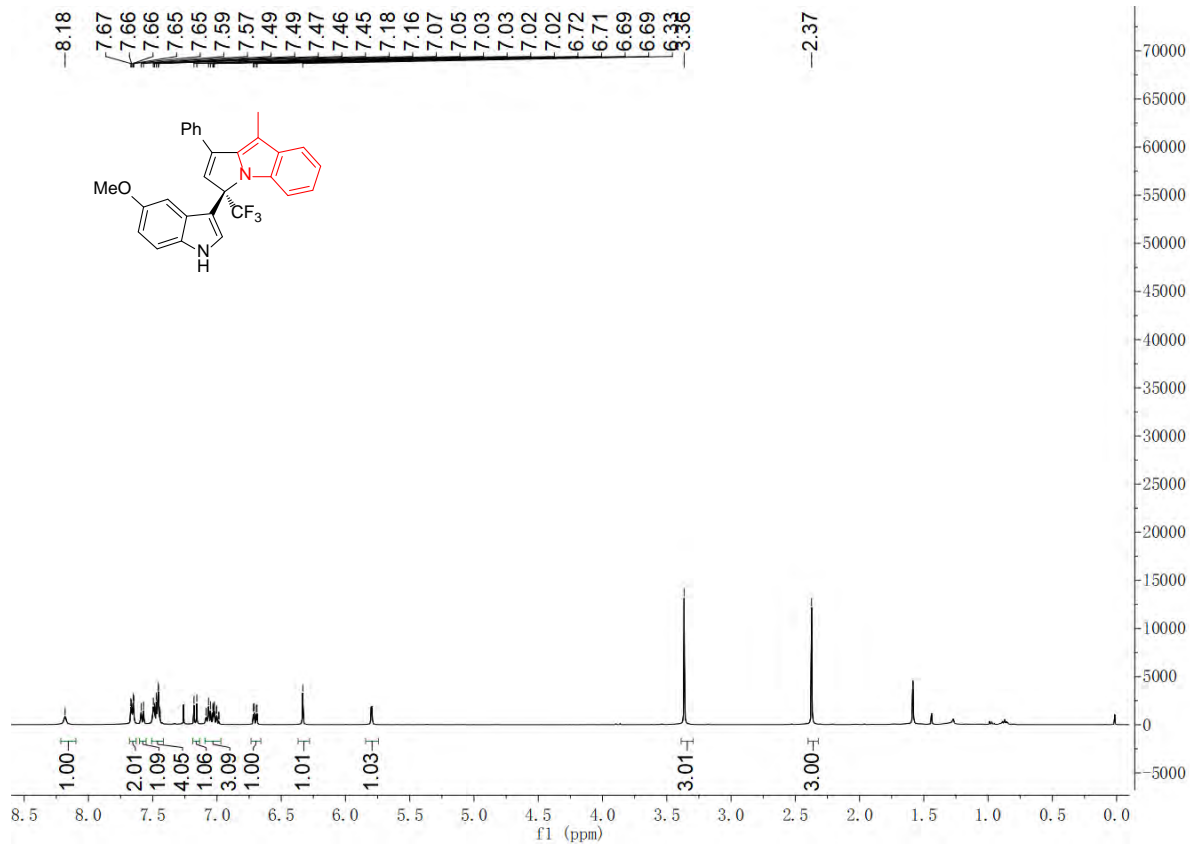

**<sup>13</sup>C NMR of compound 7p (in CDCl<sub>3</sub>)**

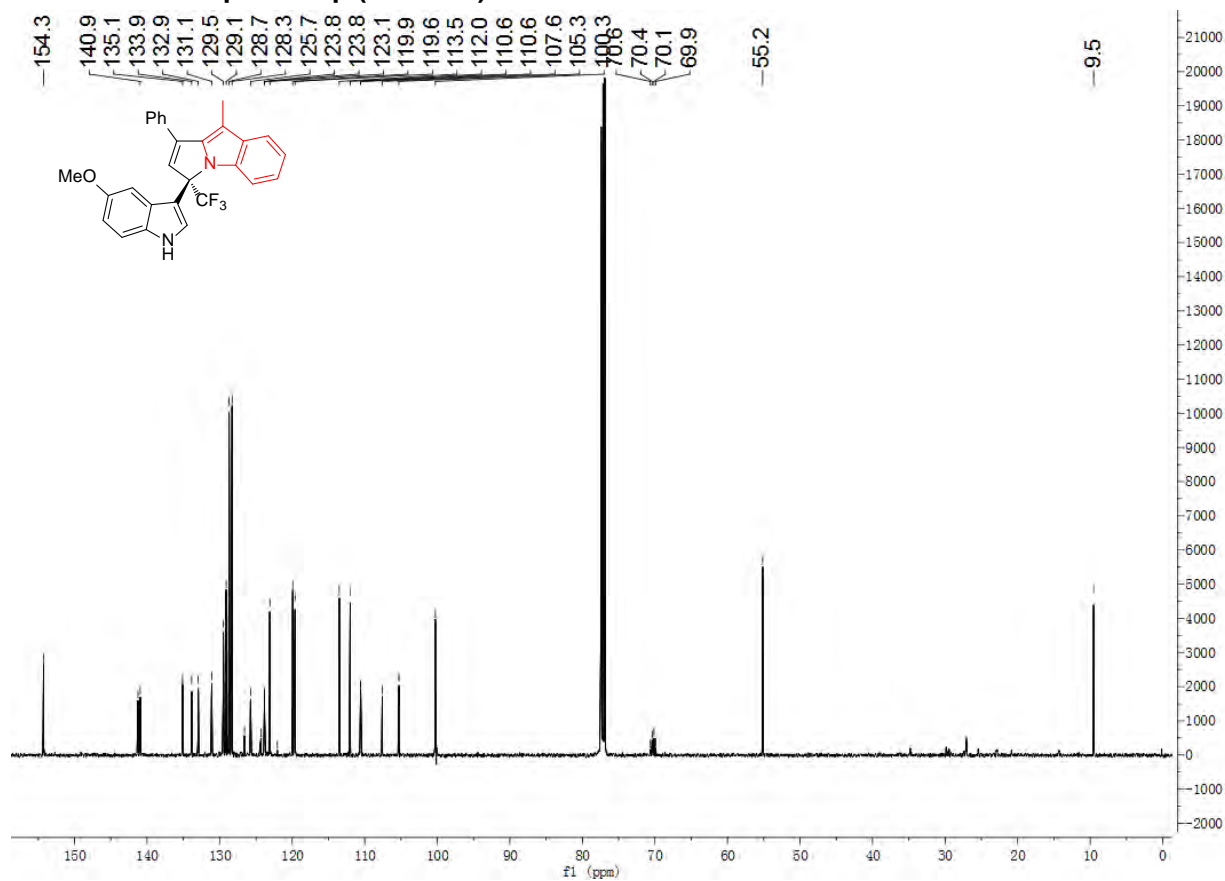

**<sup>19</sup>F NMR of compound 7p (in CDCl<sub>3</sub>)**

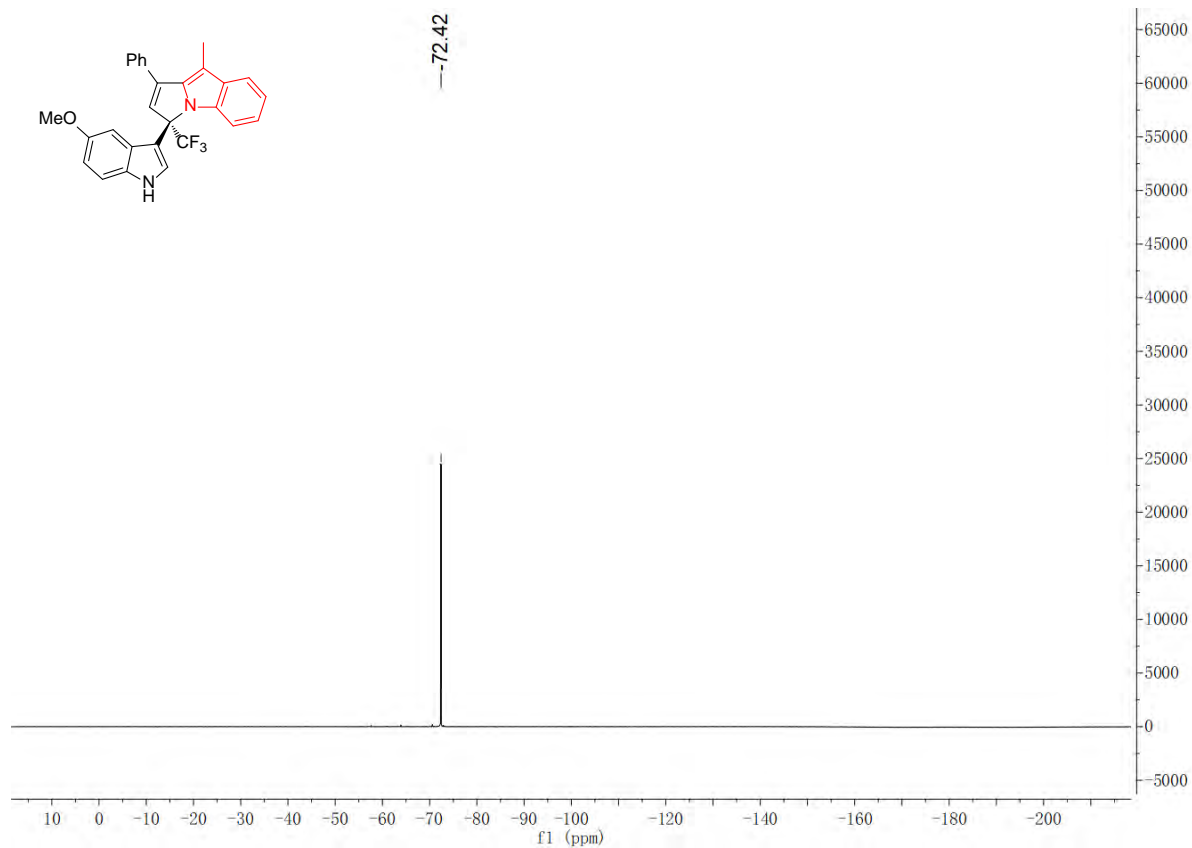



### <sup>1</sup>H NMR of compound 7q (in CDCl<sub>3</sub>)

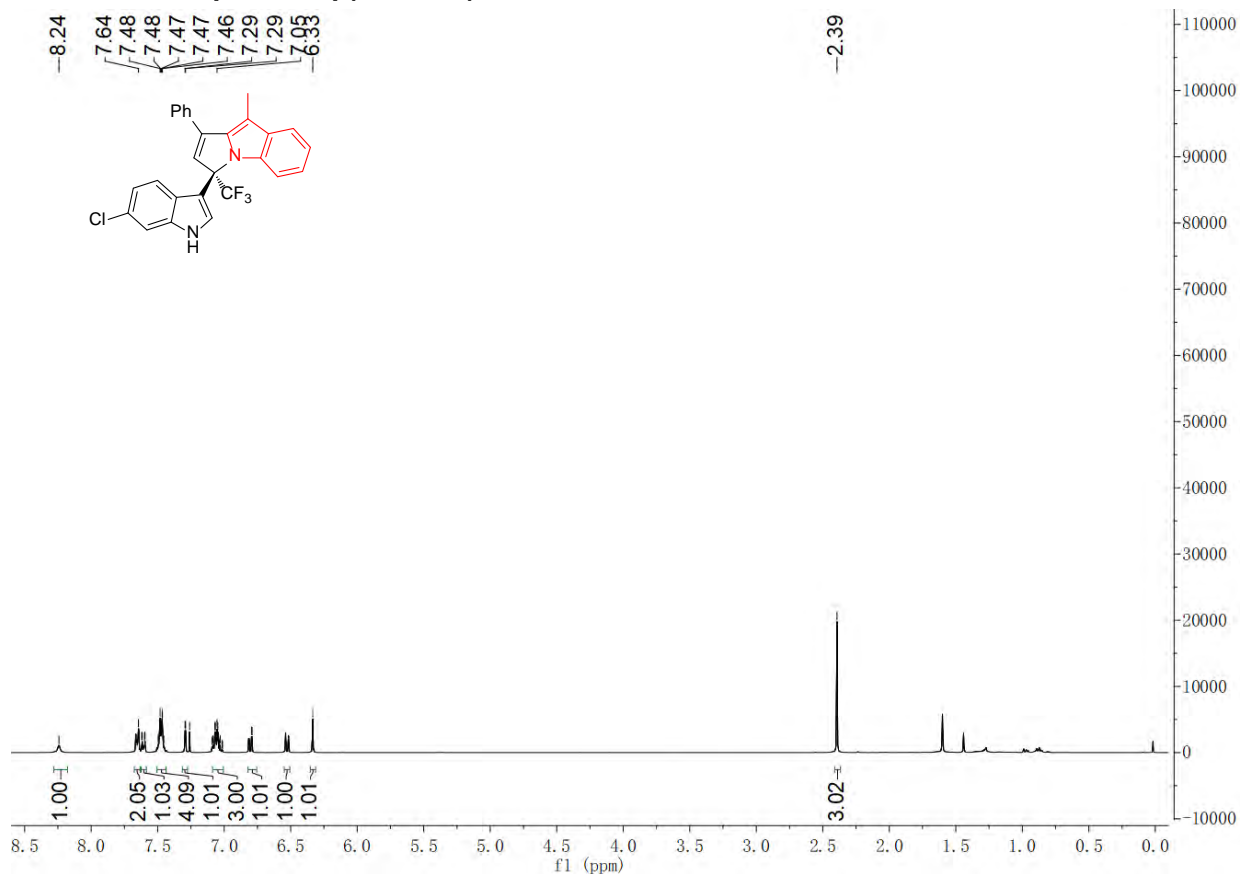

### <sup>13</sup>C NMR of compound 7q (in CDCl<sub>3</sub>)

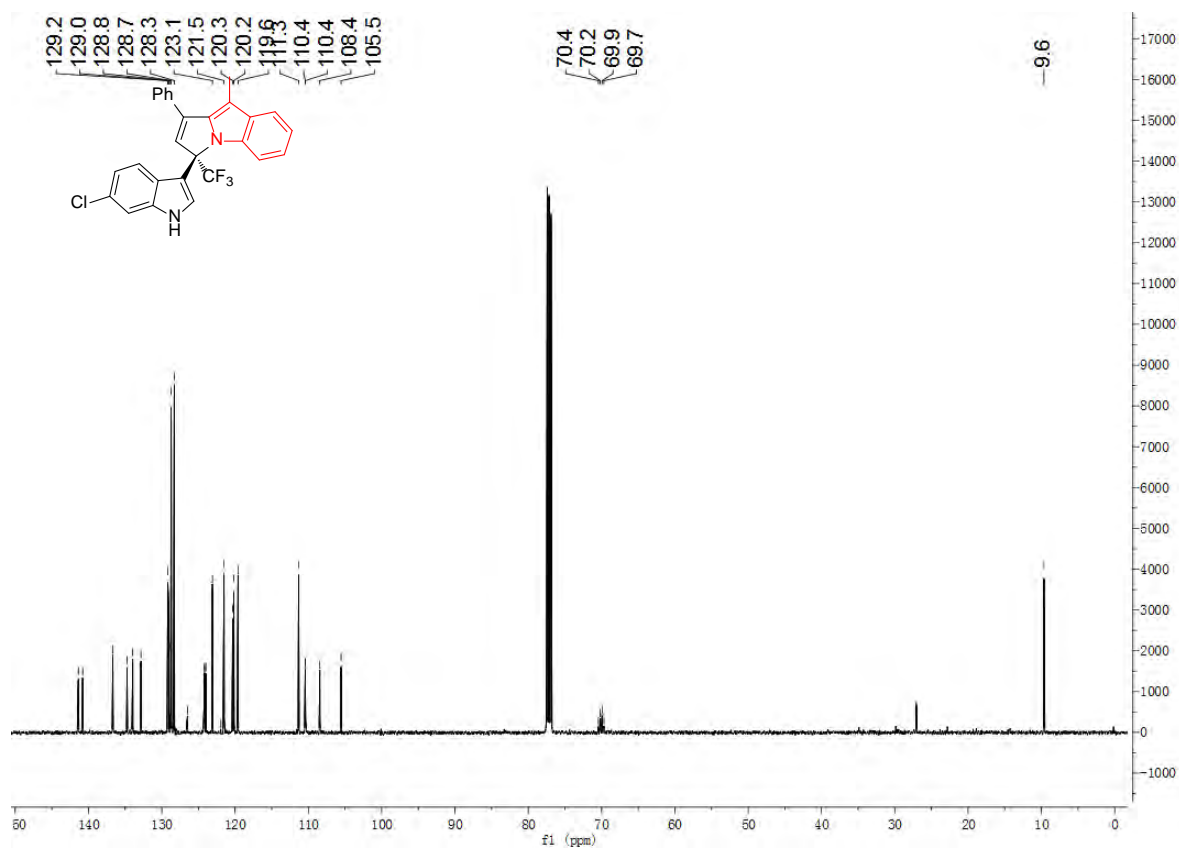

### <sup>19</sup>F NMR of compound 7q (in CDCl<sub>3</sub>)

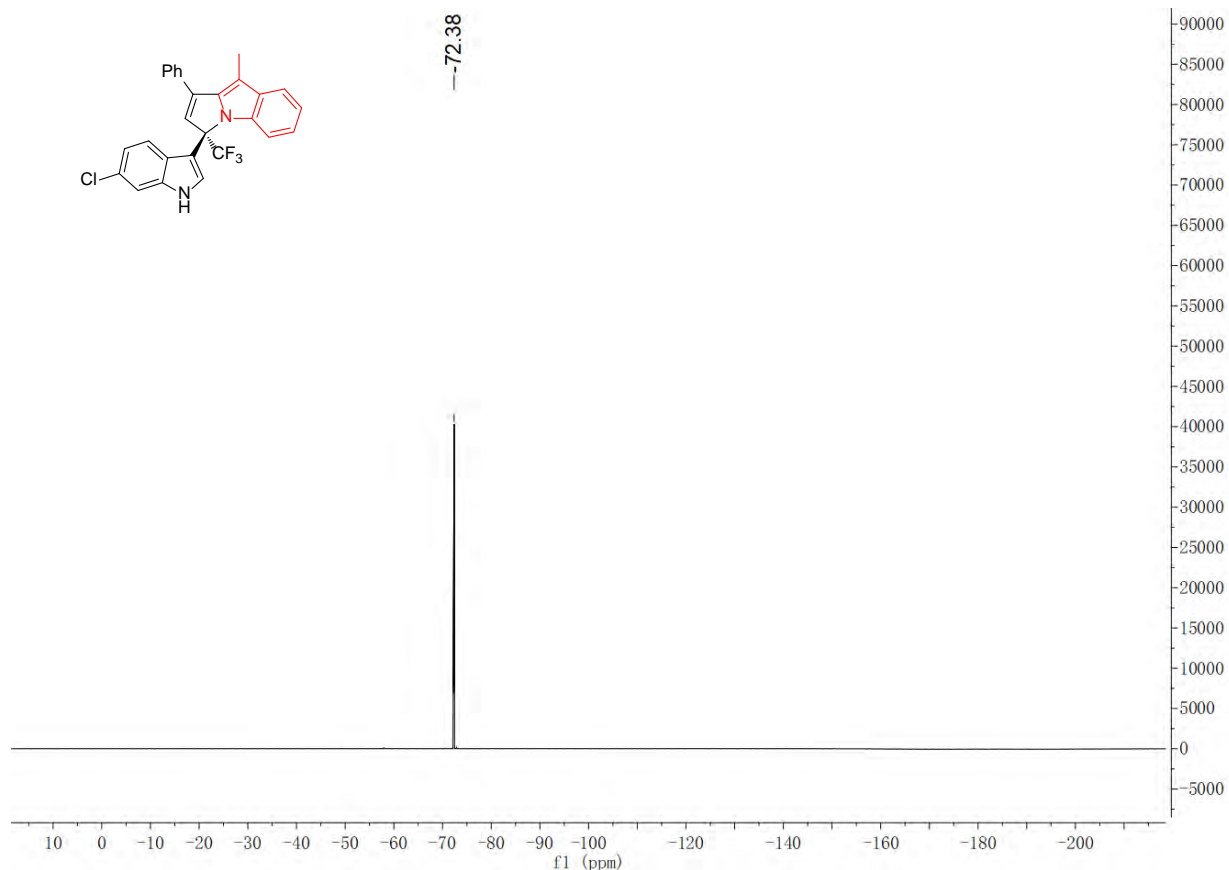

### <sup>1</sup>H NMR of compound 7r (in CDCl<sub>3</sub>)

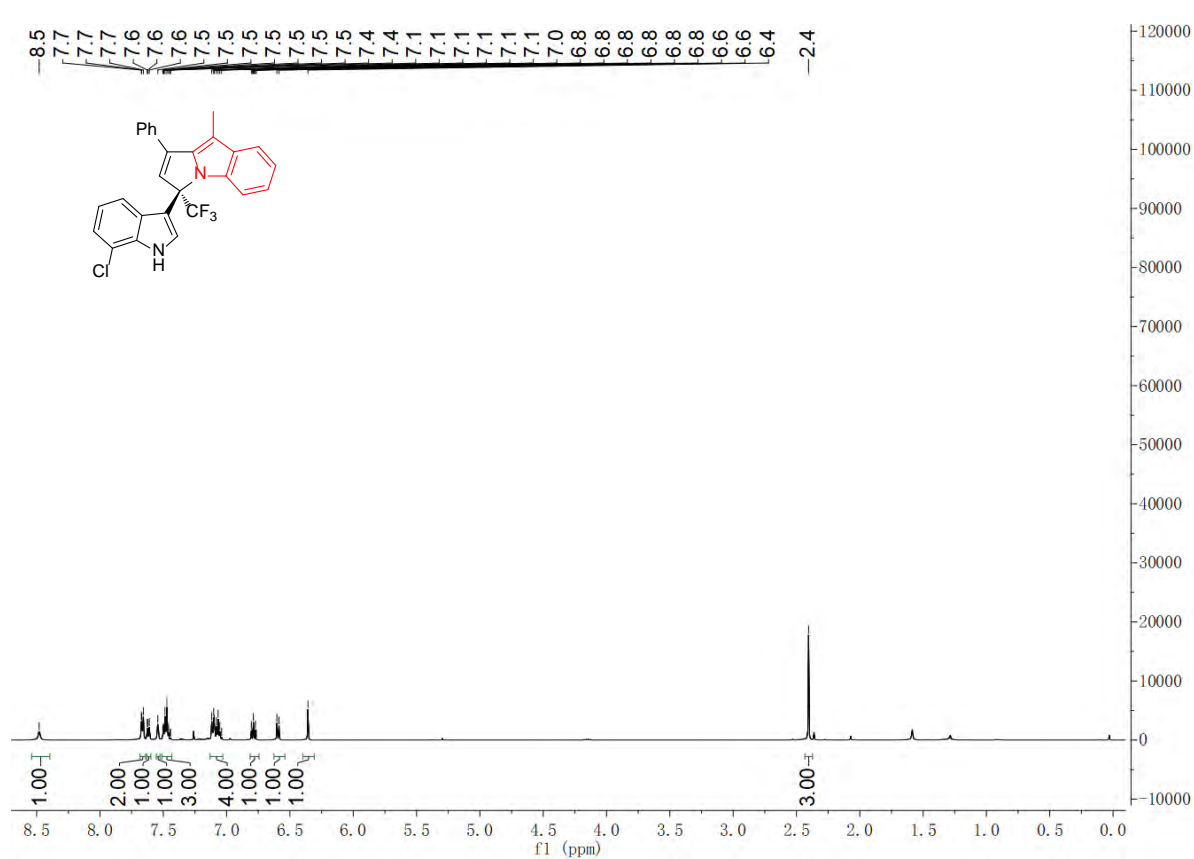

**<sup>13</sup>C NMR of compound 7r (in CDCl<sub>3</sub>)**

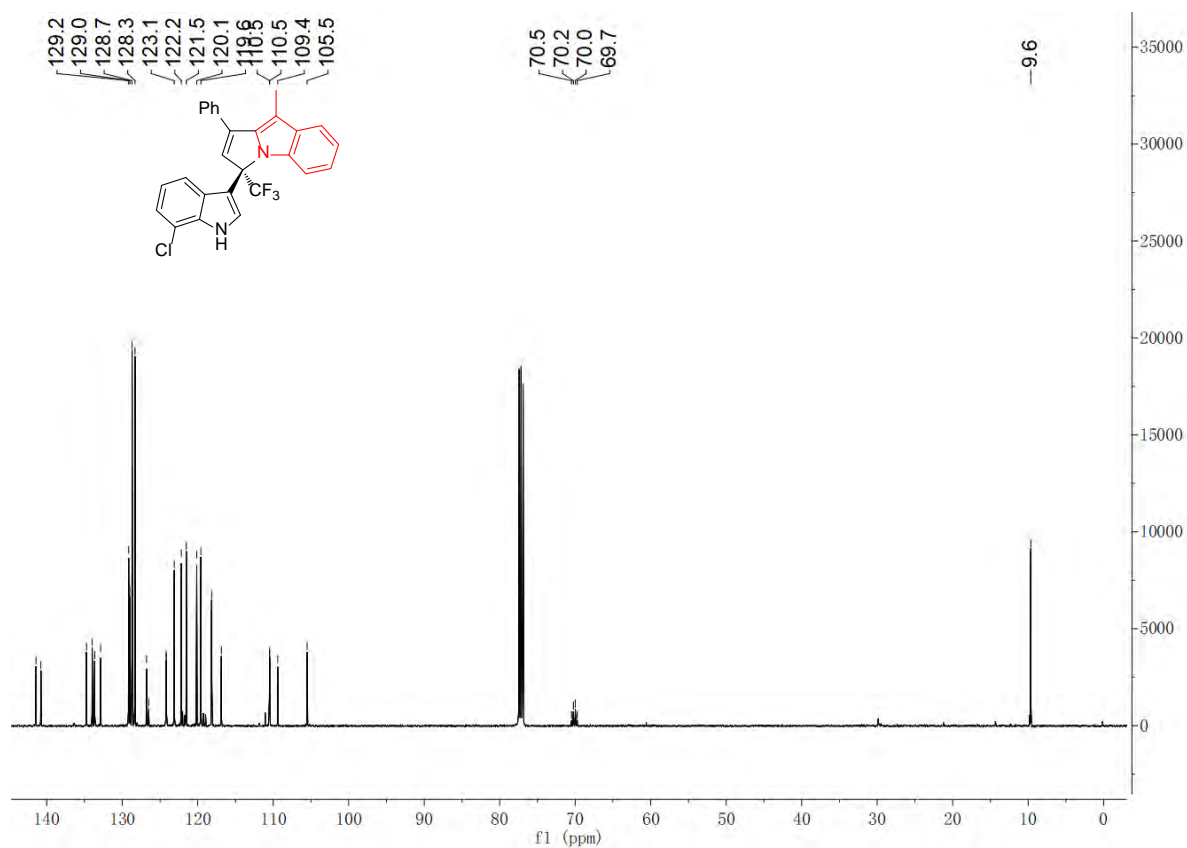

**<sup>19</sup>F NMR of compound 7r (in CDCl<sub>3</sub>)**

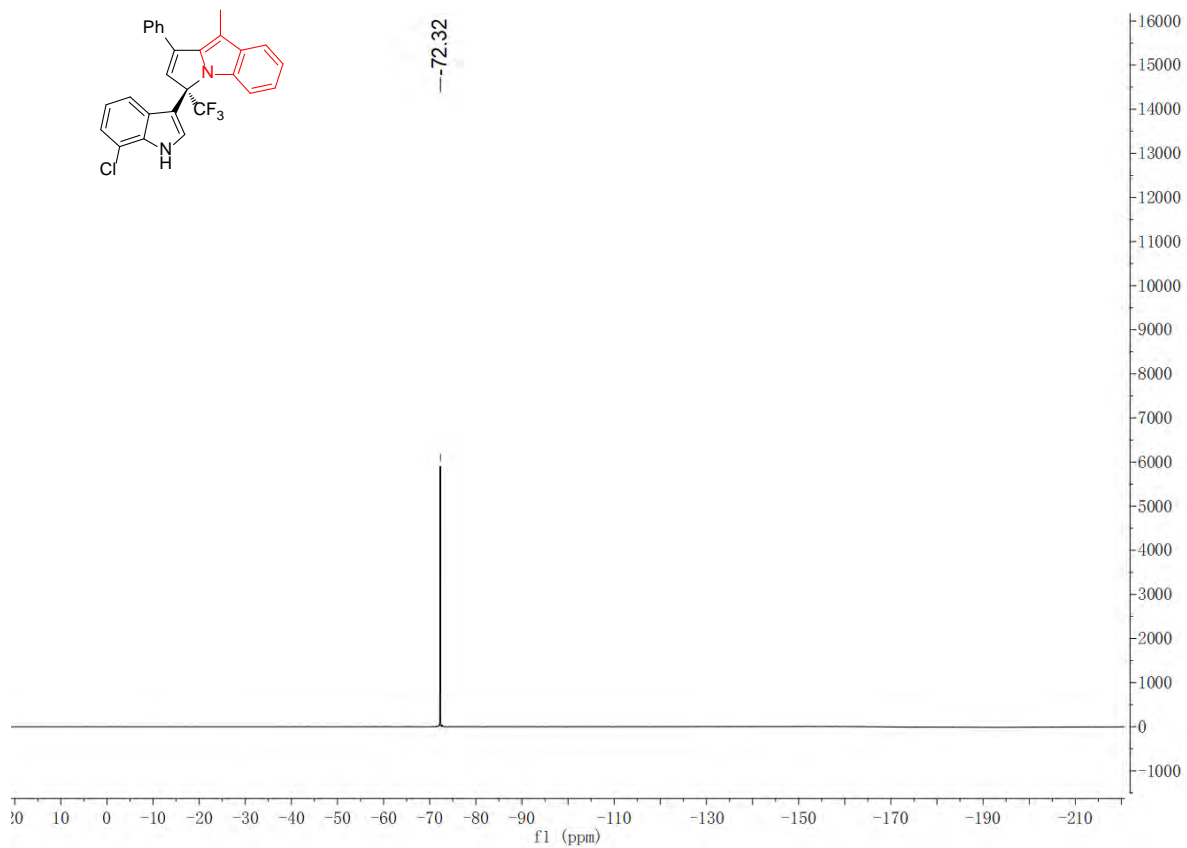

### <sup>1</sup>H NMR of compound 7s (in CDCl<sub>3</sub>)

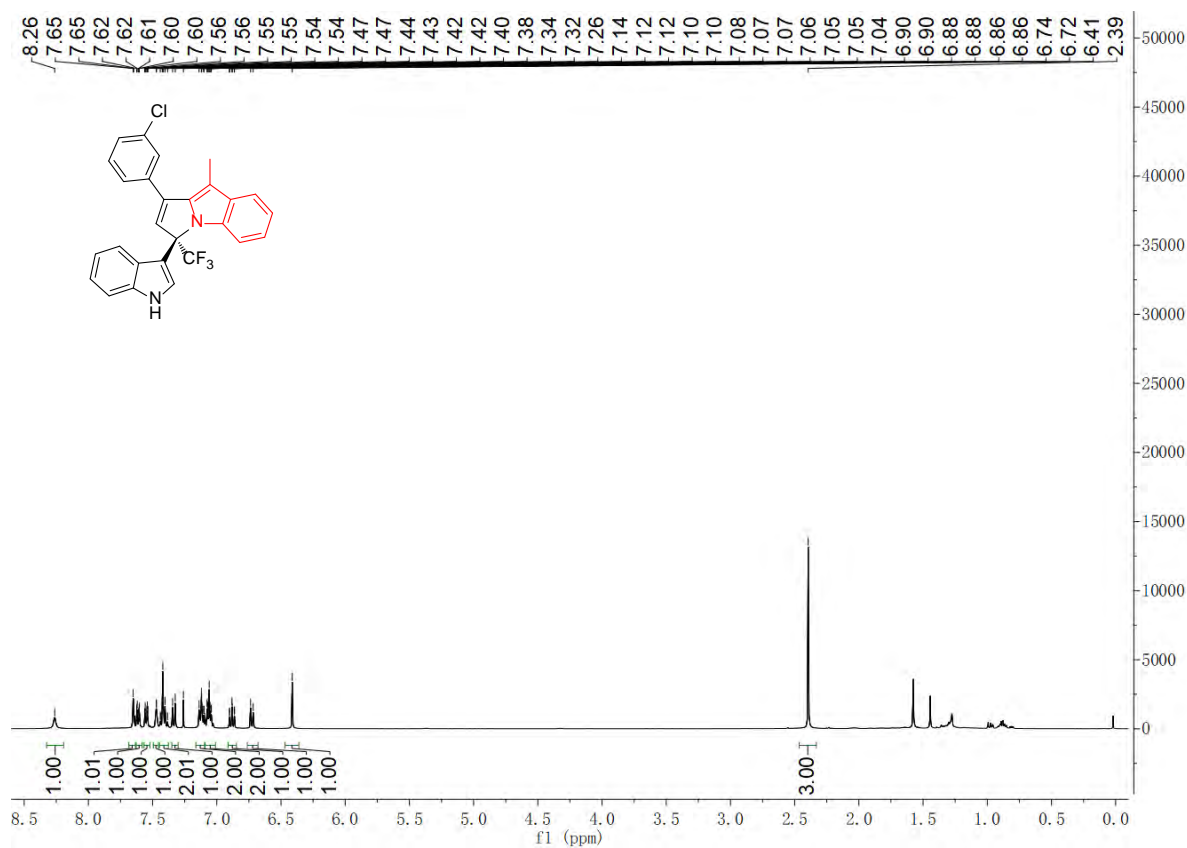

### <sup>13</sup>C NMR of compound 7s (in CDCl<sub>3</sub>)

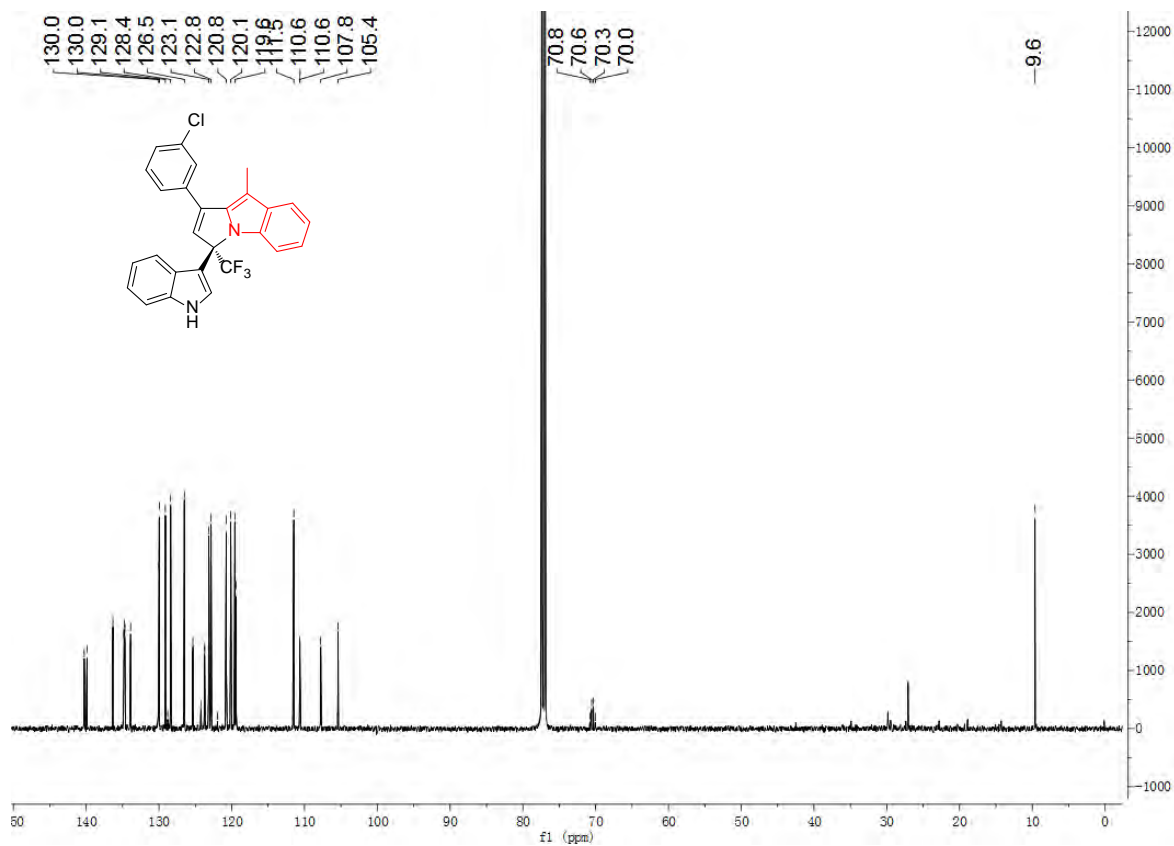

### $^{19}\text{F}$ NMR of compound 7s (in $\text{CDCl}_3$ )

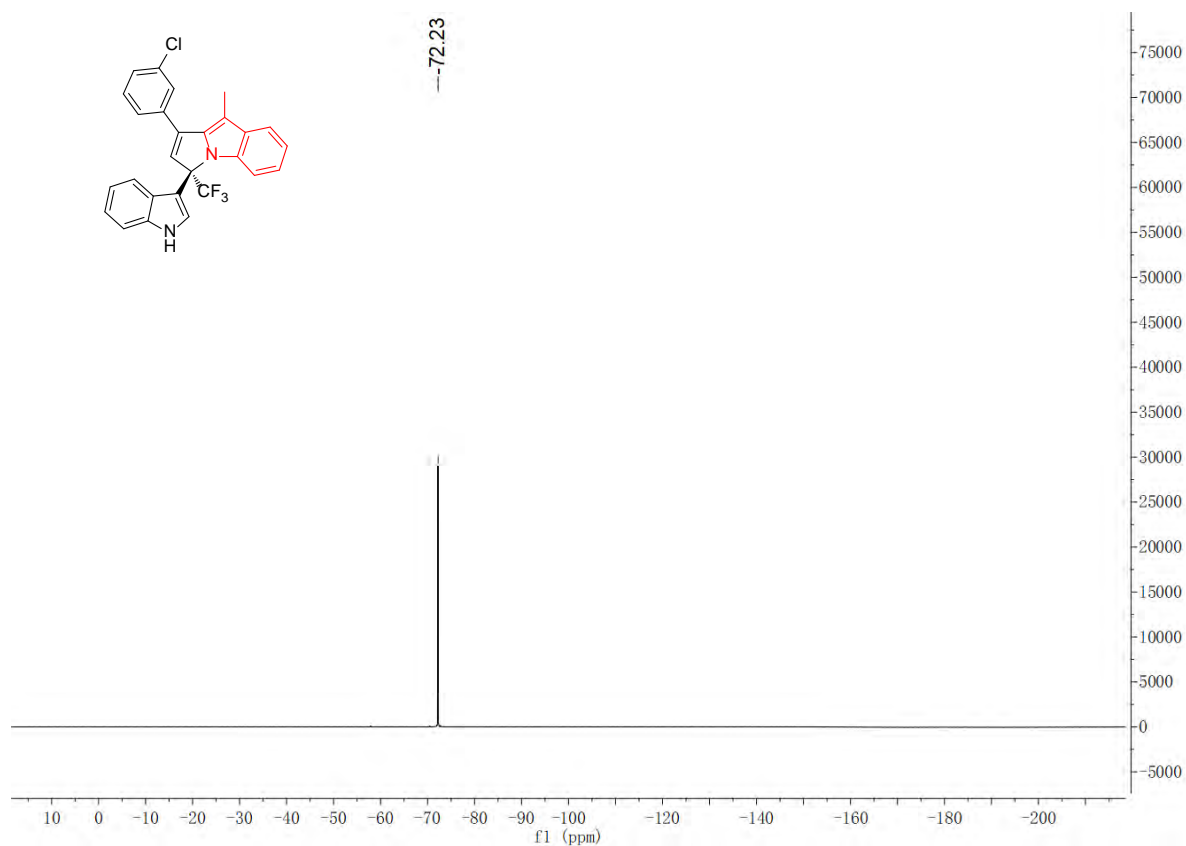

### $^1\text{H}$ NMR of compound 7t (in $\text{CDCl}_3$ )

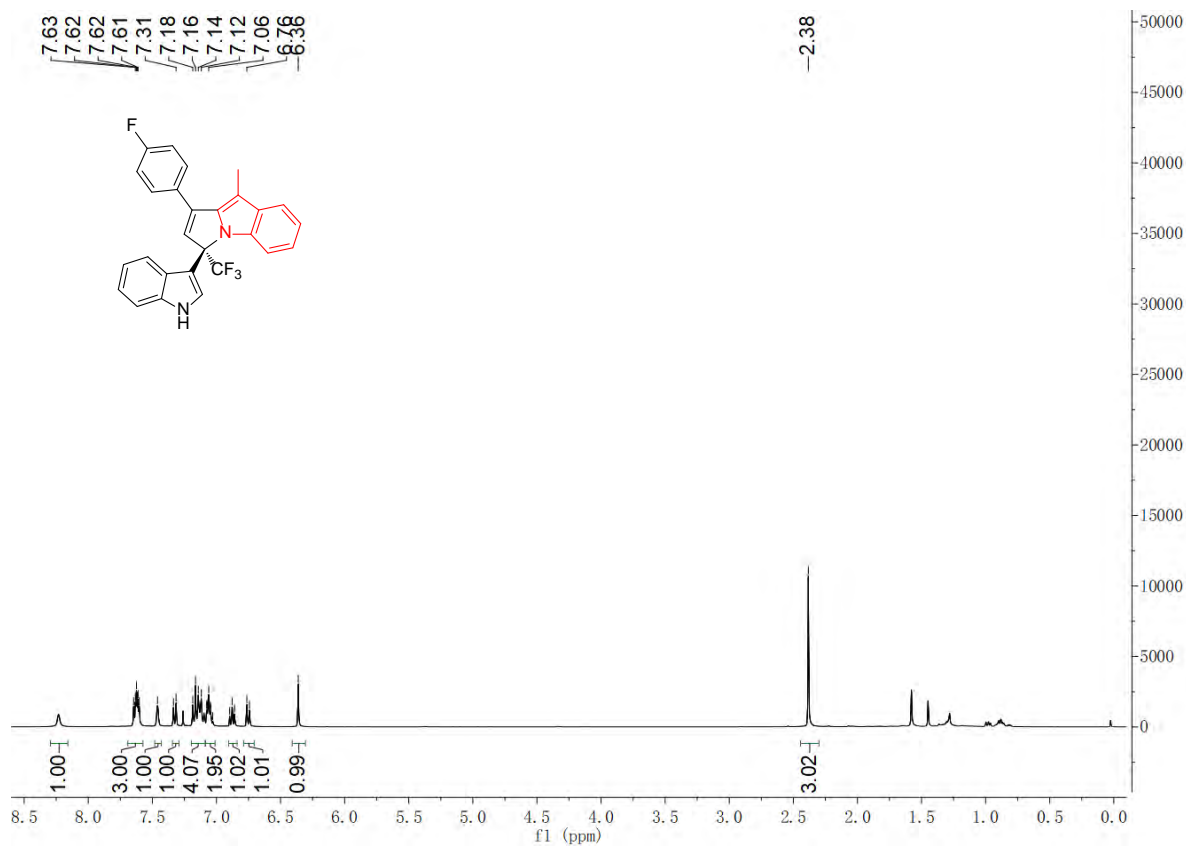

### <sup>13</sup>C NMR of compound 7t (in CDCl<sub>3</sub>)

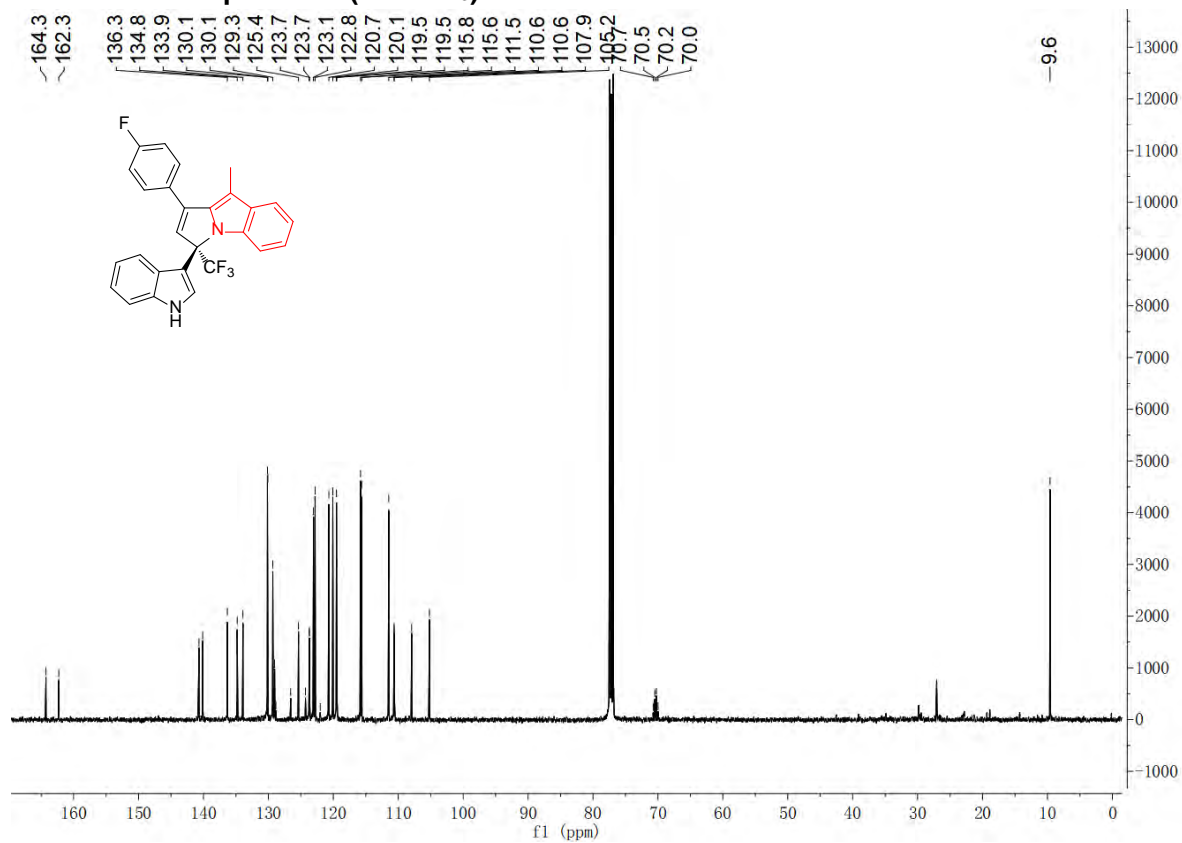

### <sup>19</sup>F NMR of compound 7t (in CDCl<sub>3</sub>)

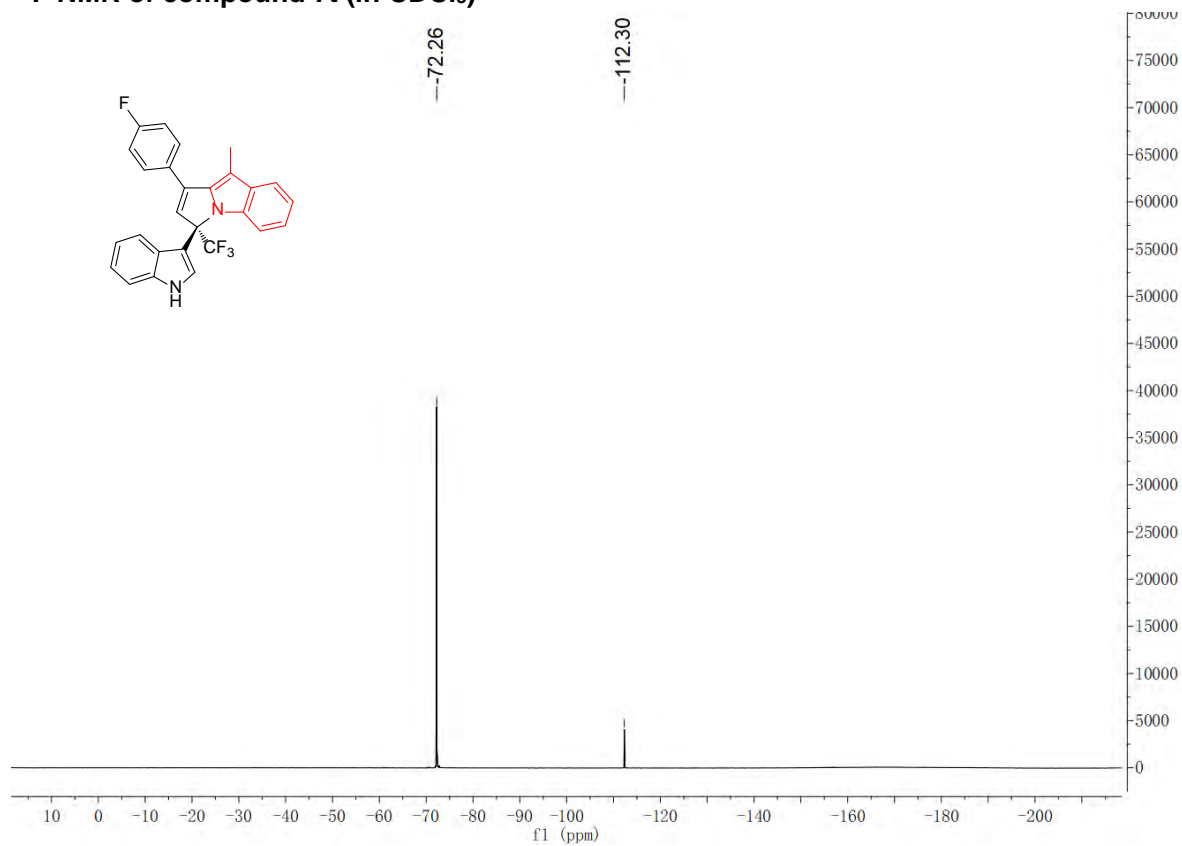

### <sup>1</sup>H NMR of compound 7u (in CDCl<sub>3</sub>)

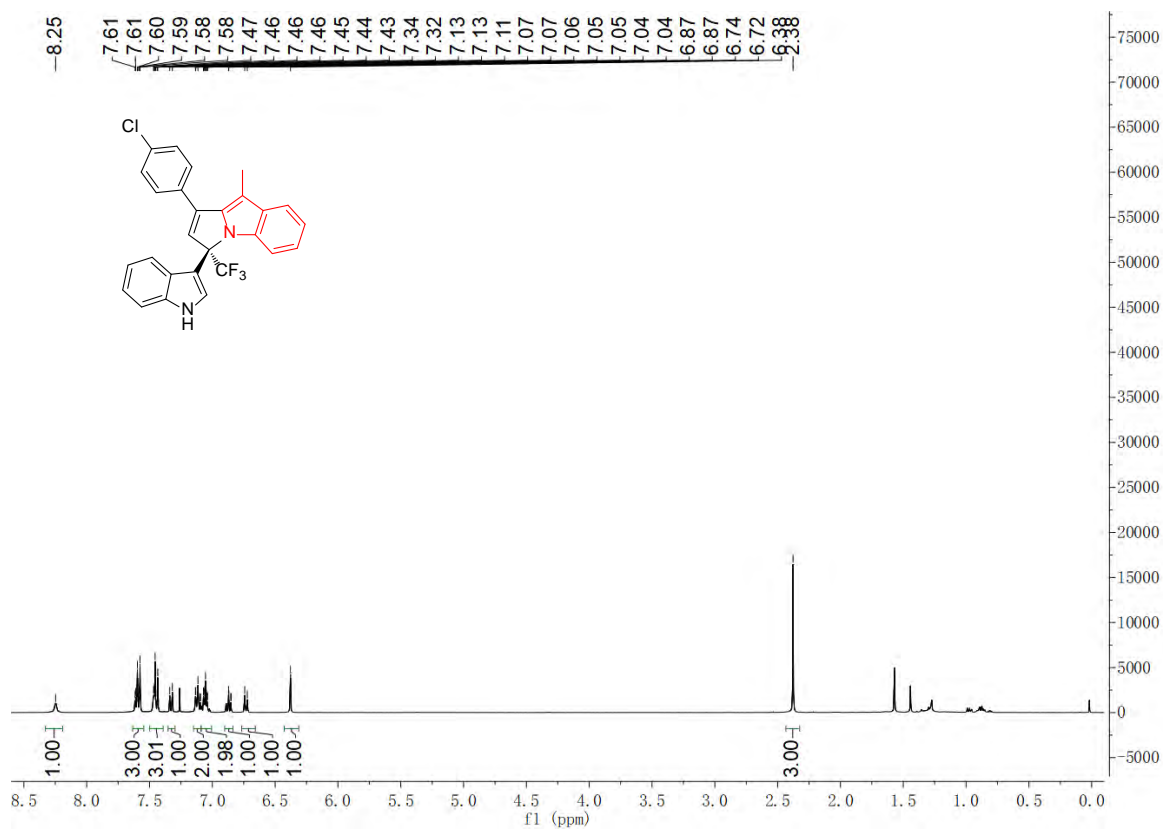

### <sup>13</sup>C NMR of compound 7u (in CDCl<sub>3</sub>)

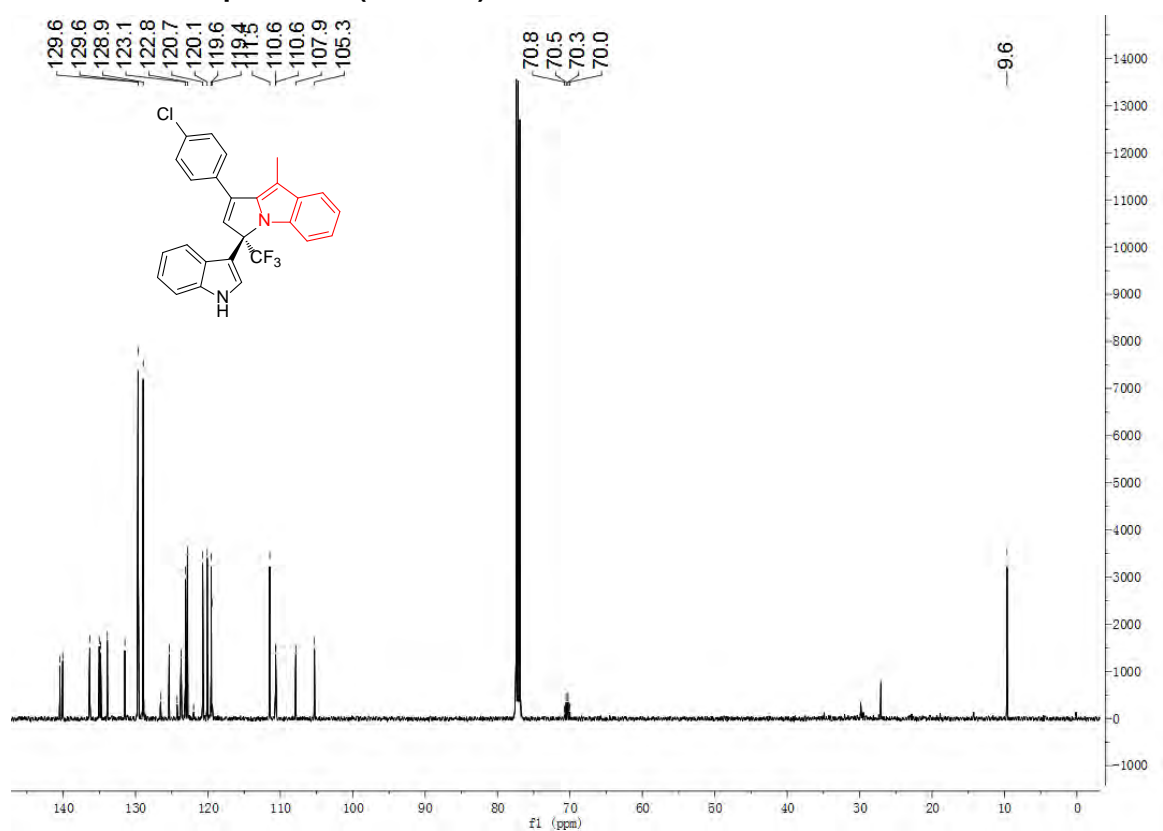

### $^{19}\text{F}$ NMR of compound 7u (in $\text{CDCl}_3$ )

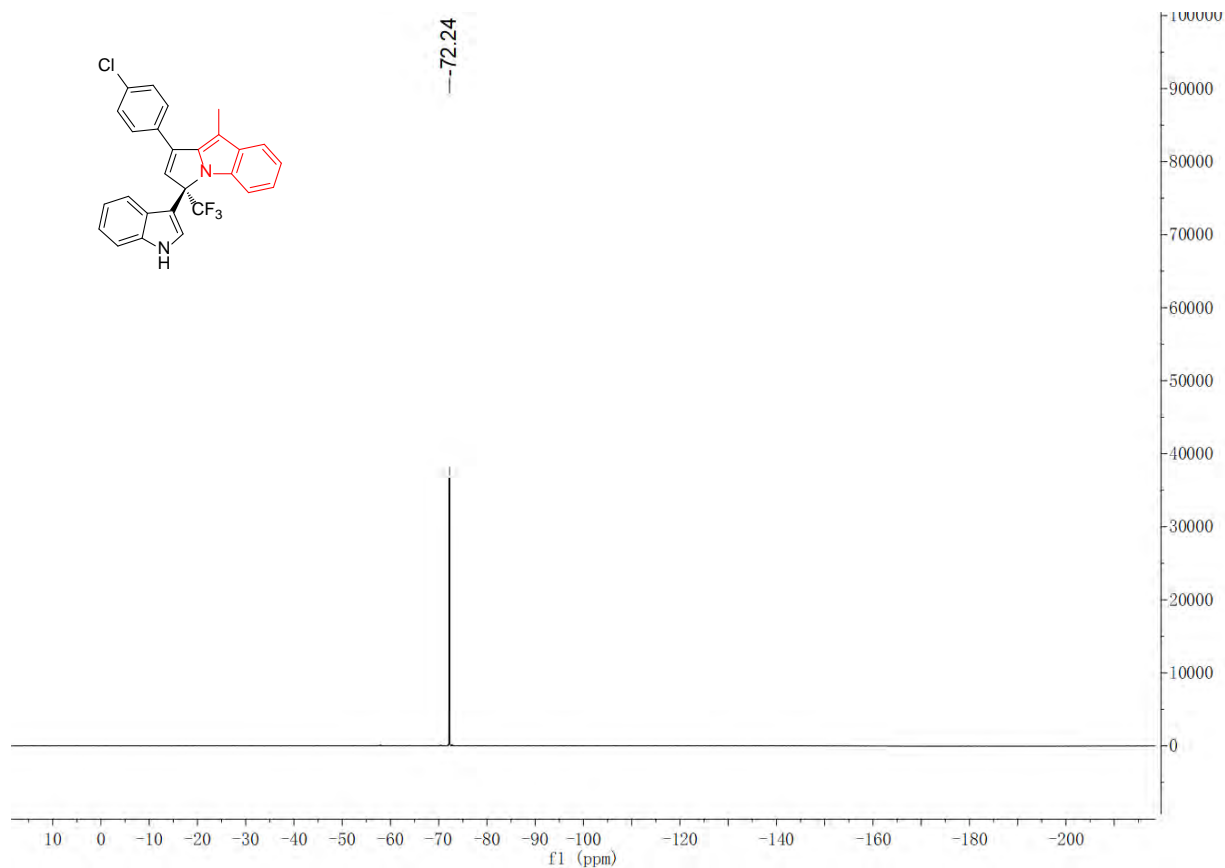

### $^1\text{H}$ NMR of compound 7v (in $\text{CDCl}_3$ )

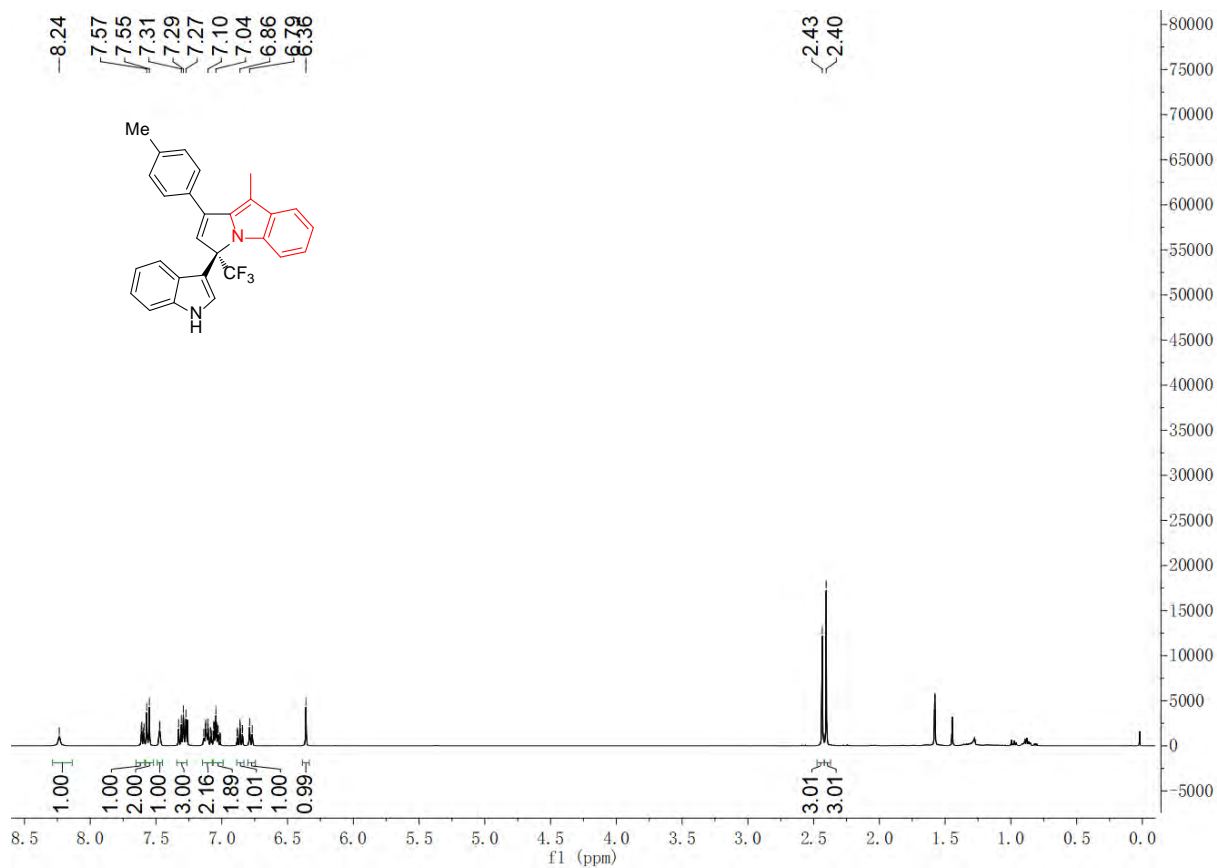



**<sup>13</sup>C NMR of compound 7v (in CDCl<sub>3</sub>)**

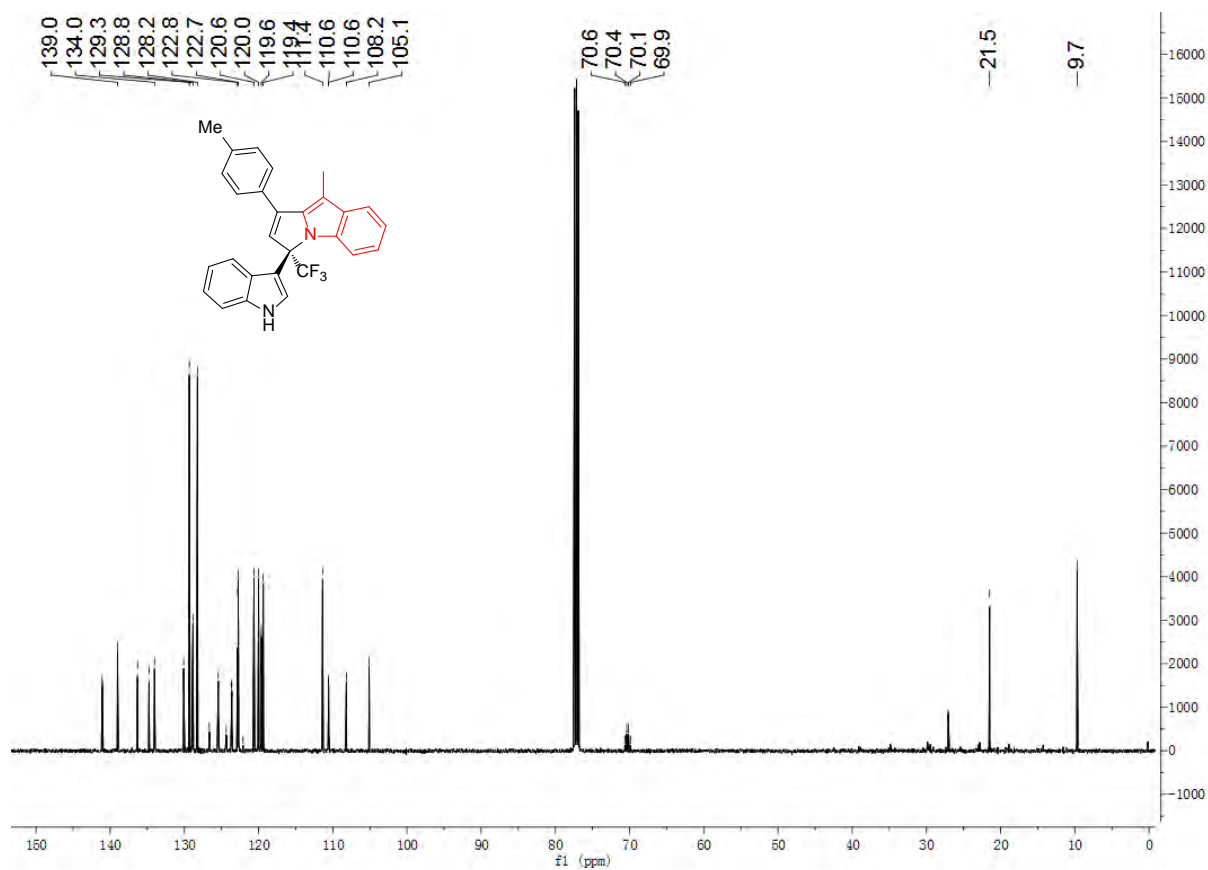

**<sup>19</sup>F NMR of compound 7v (in CDCl<sub>3</sub>)**

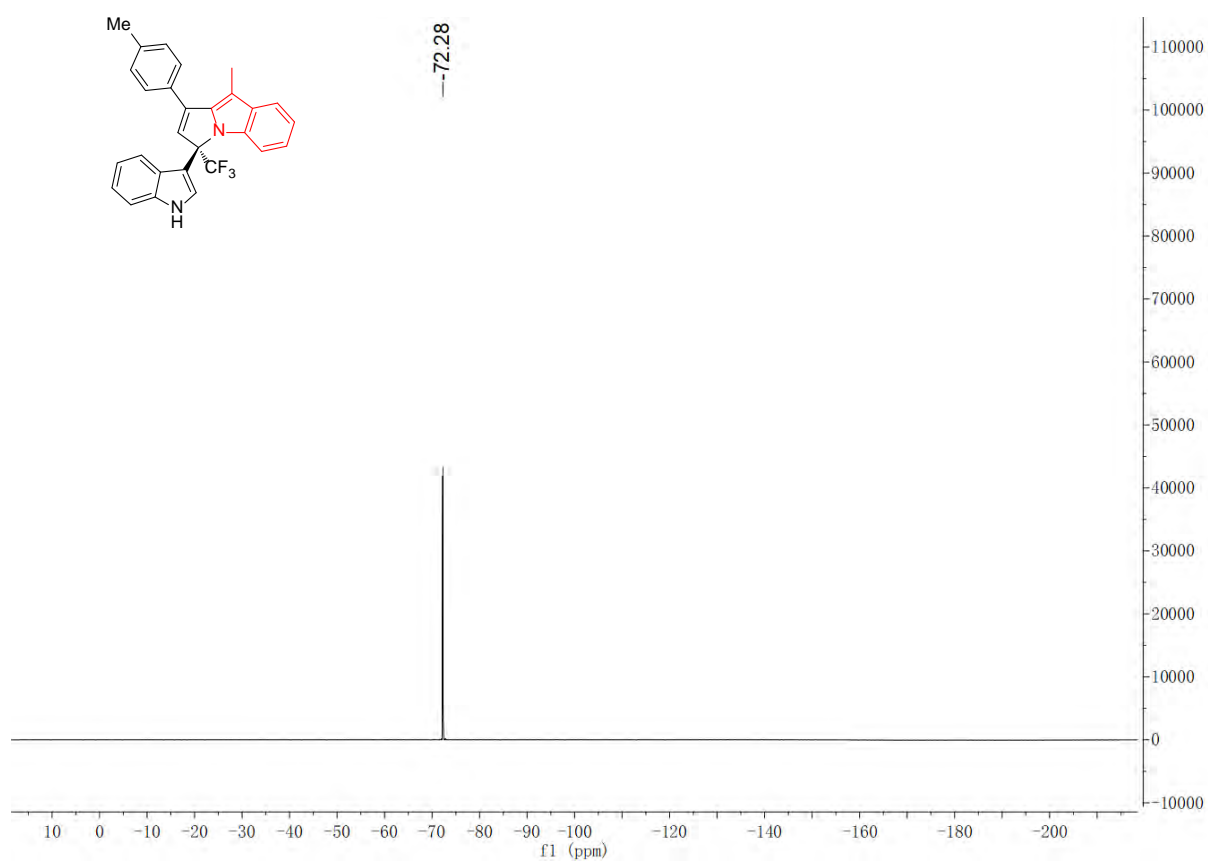

### <sup>1</sup>H NMR of compound 7w (in CDCl<sub>3</sub>)

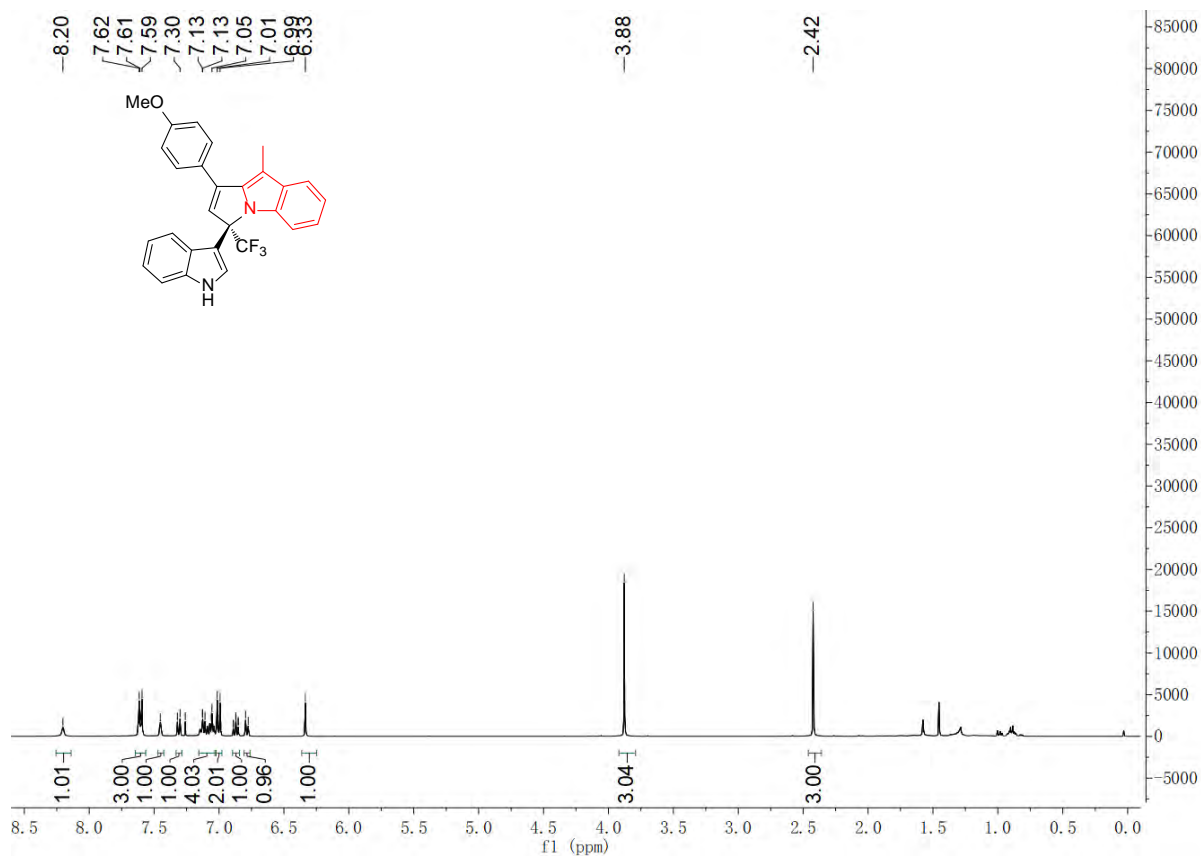

### <sup>13</sup>C NMR of compound 7w (in CDCl<sub>3</sub>)

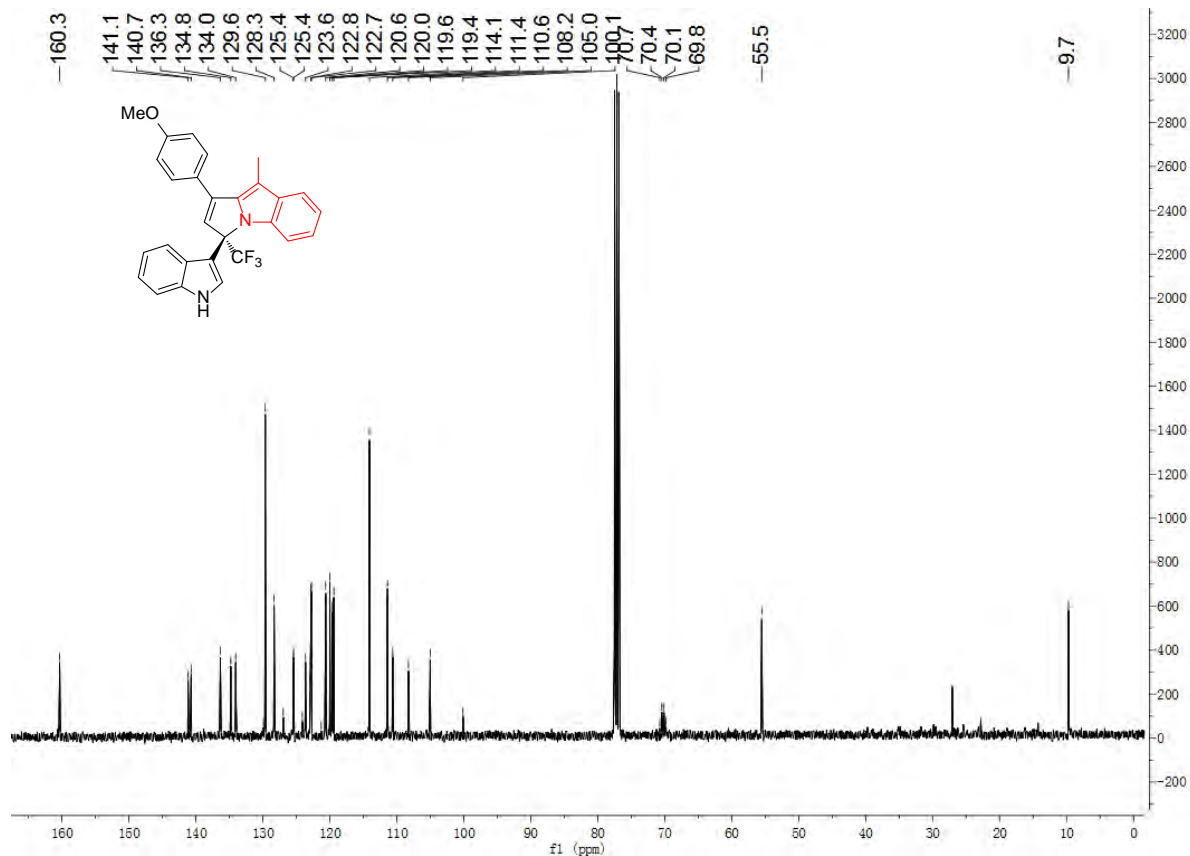

### <sup>19</sup>F NMR of compound 7w (in CDCl<sub>3</sub>)

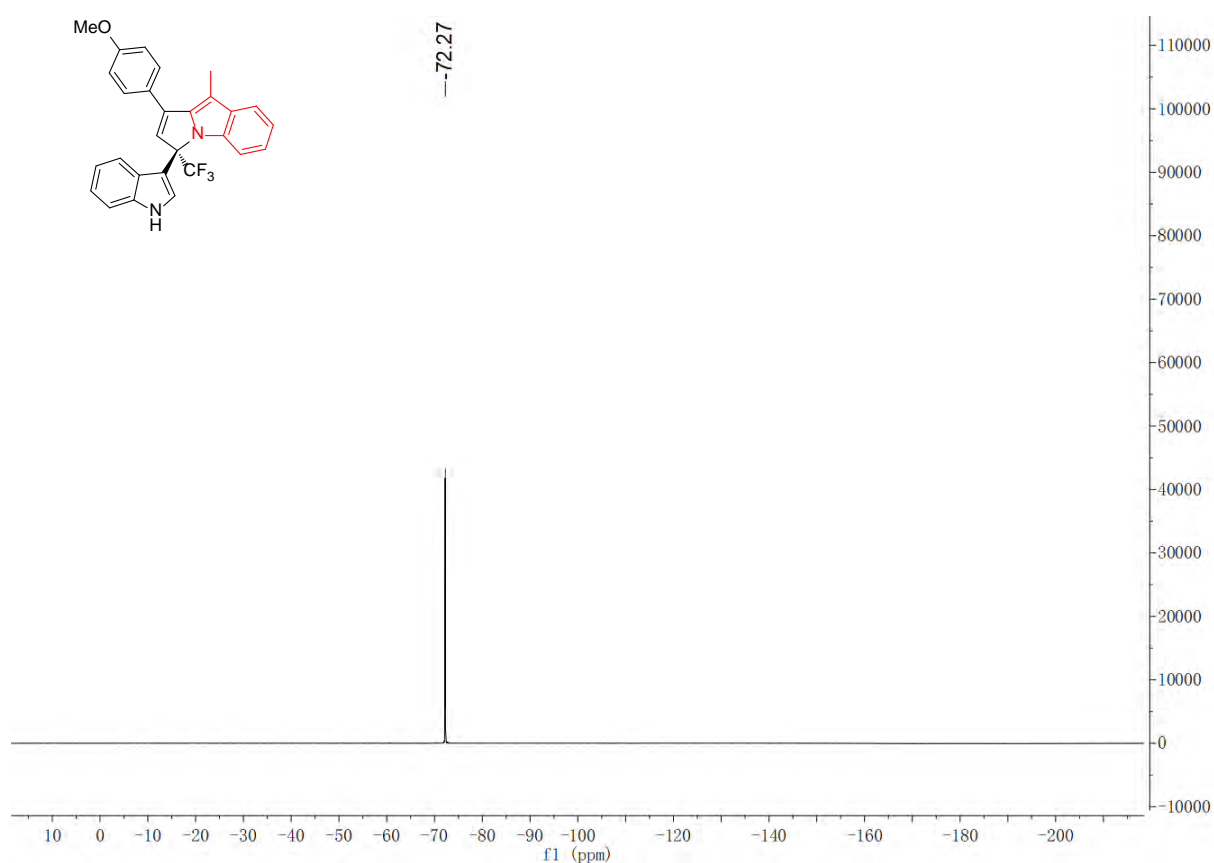

### <sup>1</sup>H NMR of compound 7x (in CDCl<sub>3</sub>)

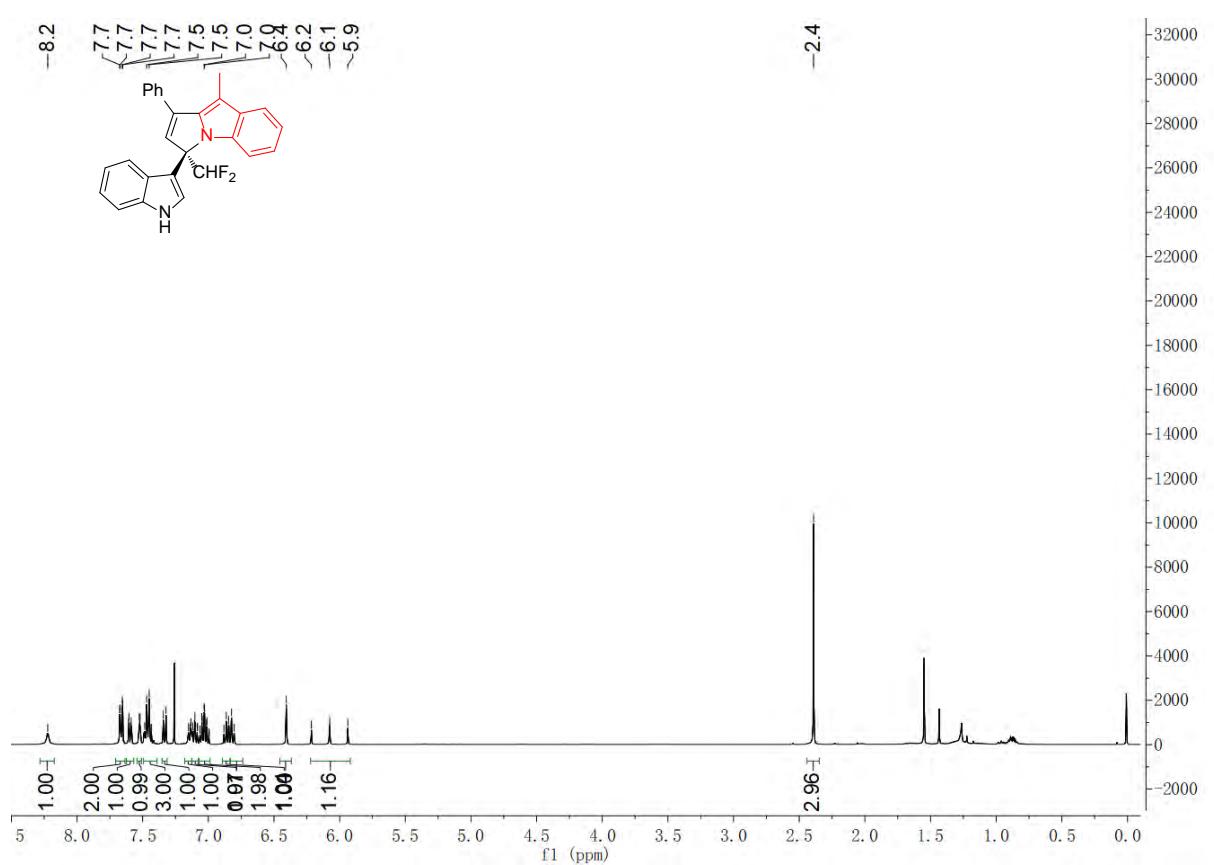

### <sup>13</sup>C NMR of compound 7x (in CDCl<sub>3</sub>)

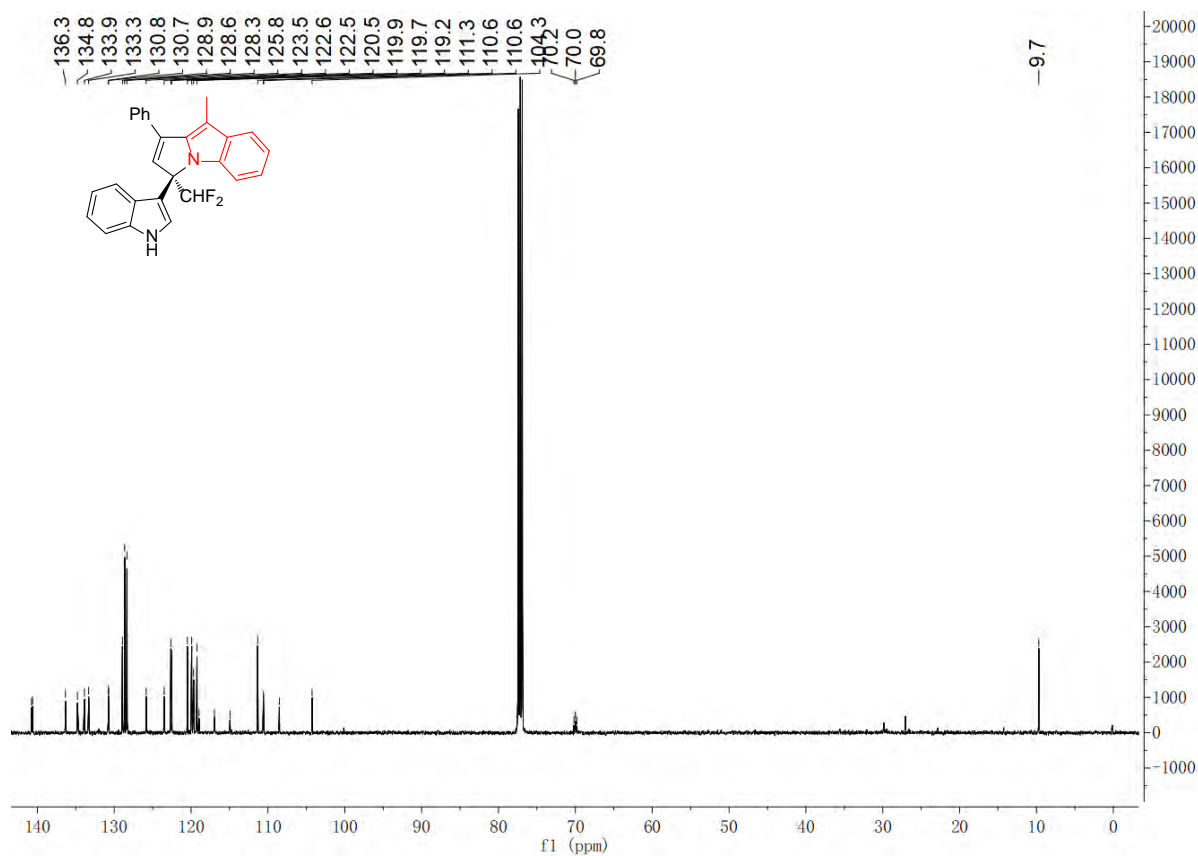

### <sup>19</sup>F NMR of compound 7x (in CDCl<sub>3</sub>)

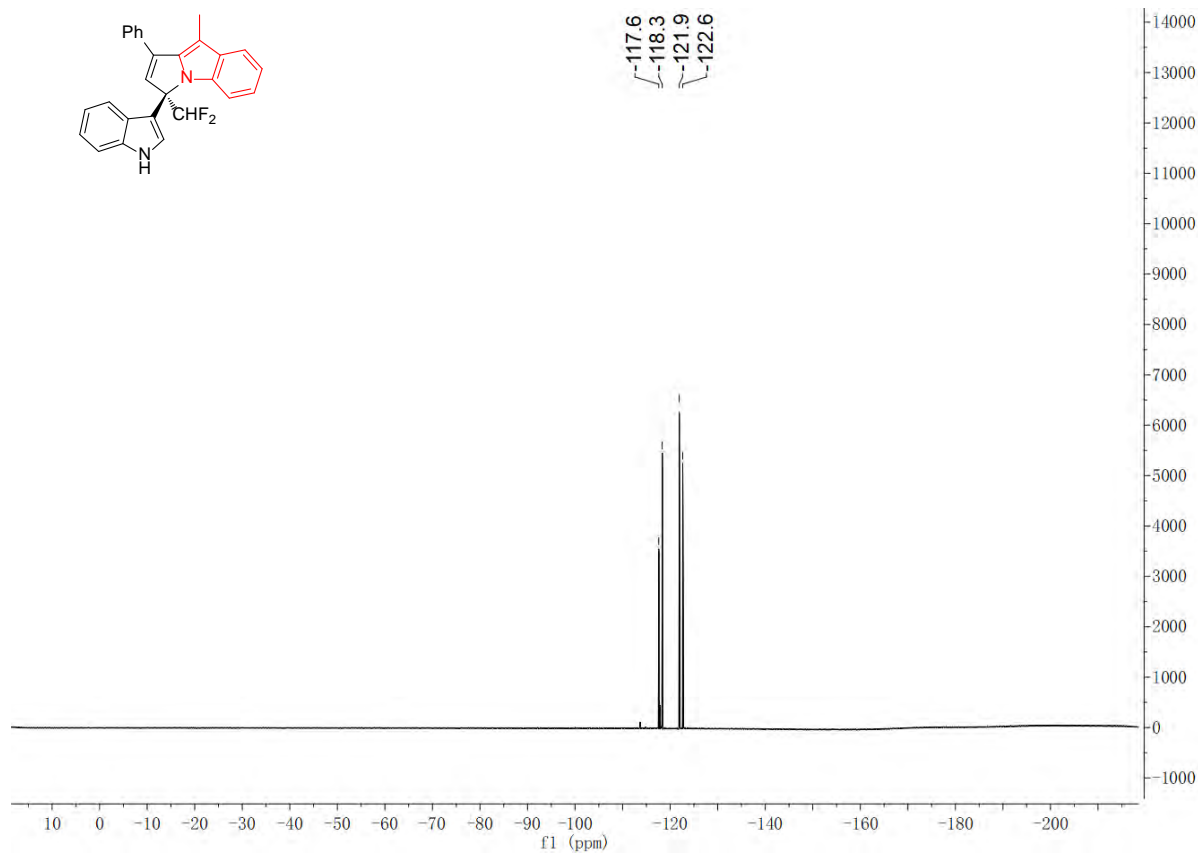

**<sup>1</sup>H NMR of compound 9 (in CDCl<sub>3</sub>)**

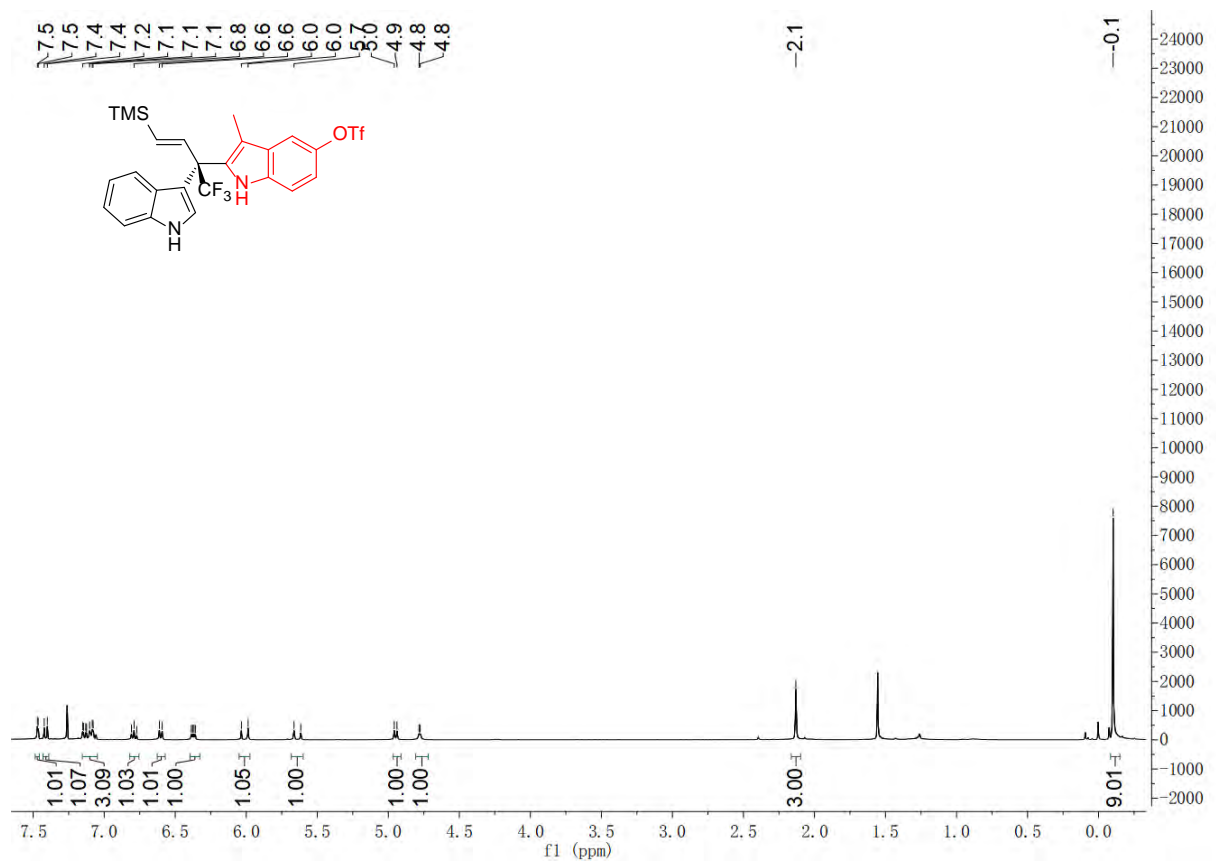

**<sup>13</sup>C NMR of compound 9 (in CDCl<sub>3</sub>)**

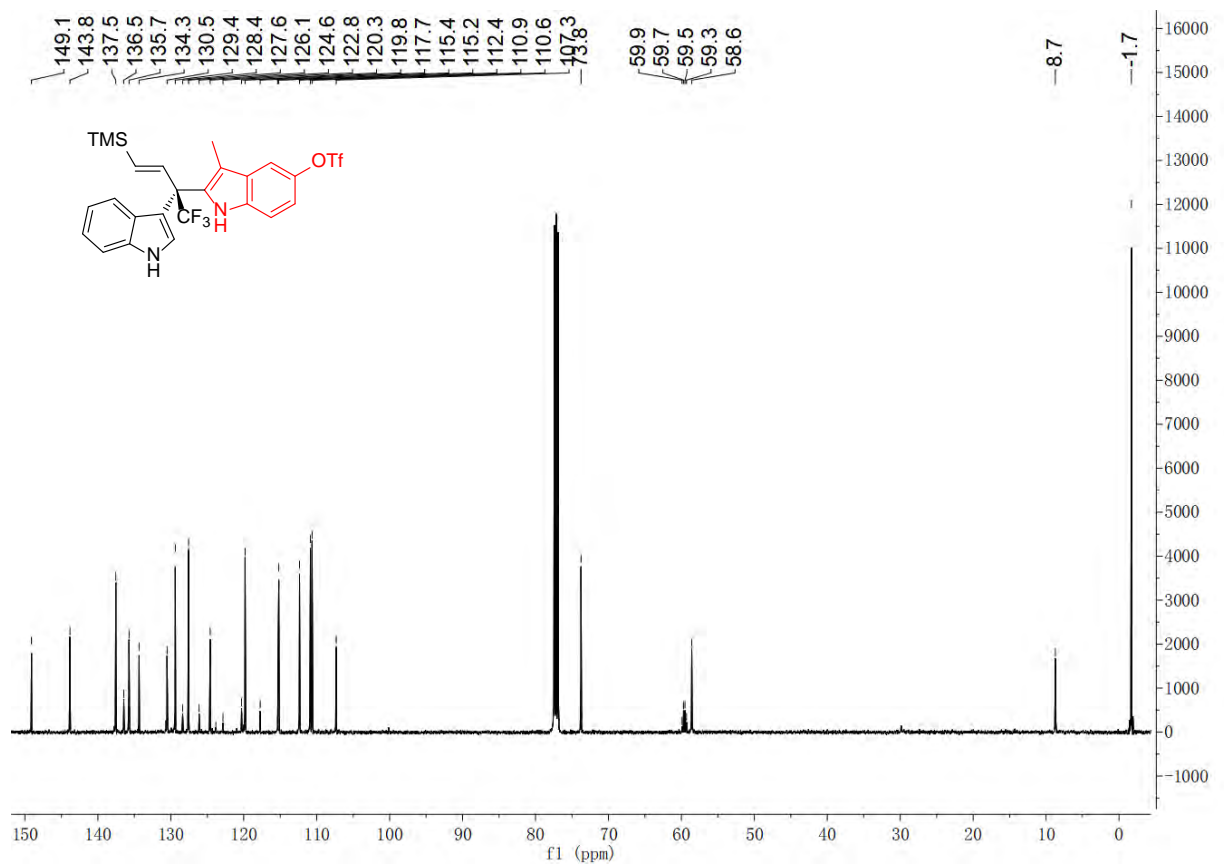

### <sup>19</sup>F NMR of compound 9 (in CDCl<sub>3</sub>)

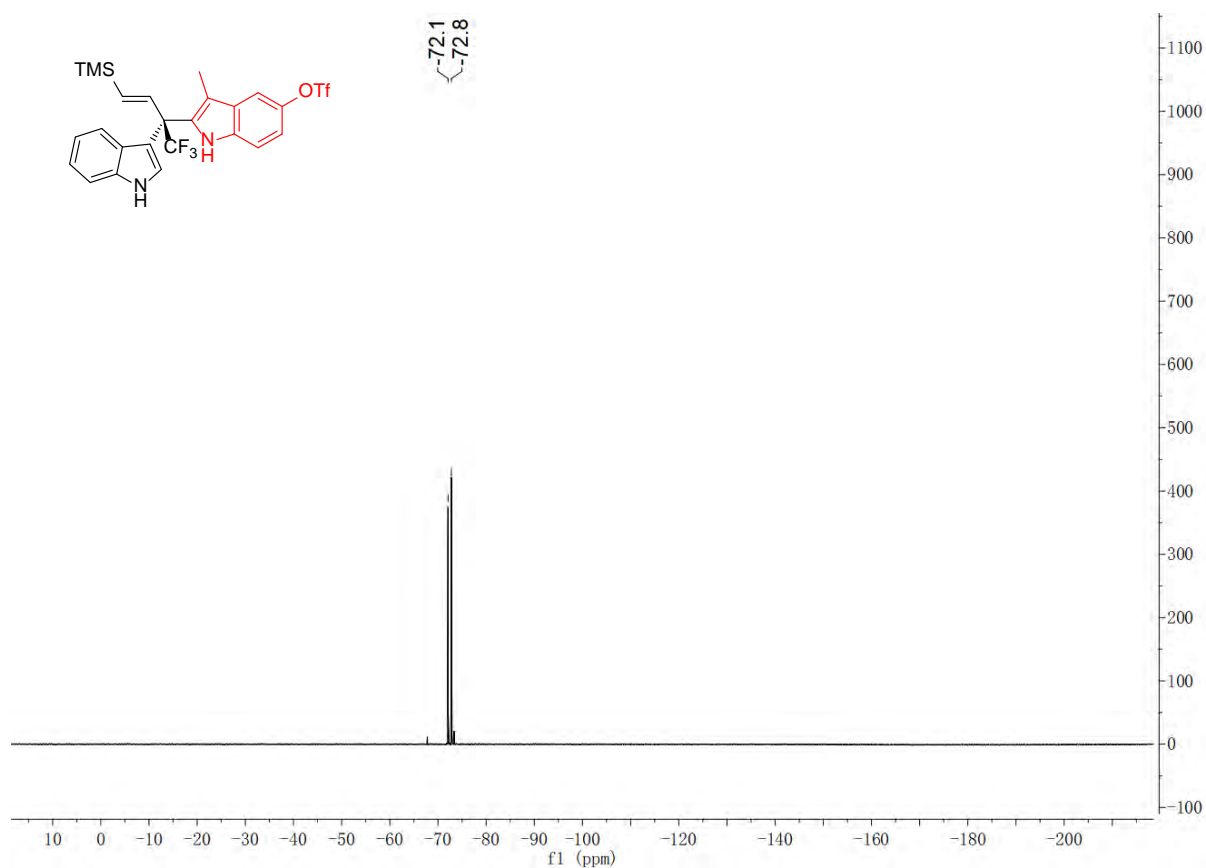

### <sup>1</sup>H NMR of compound 10 (in CDCl<sub>3</sub>)

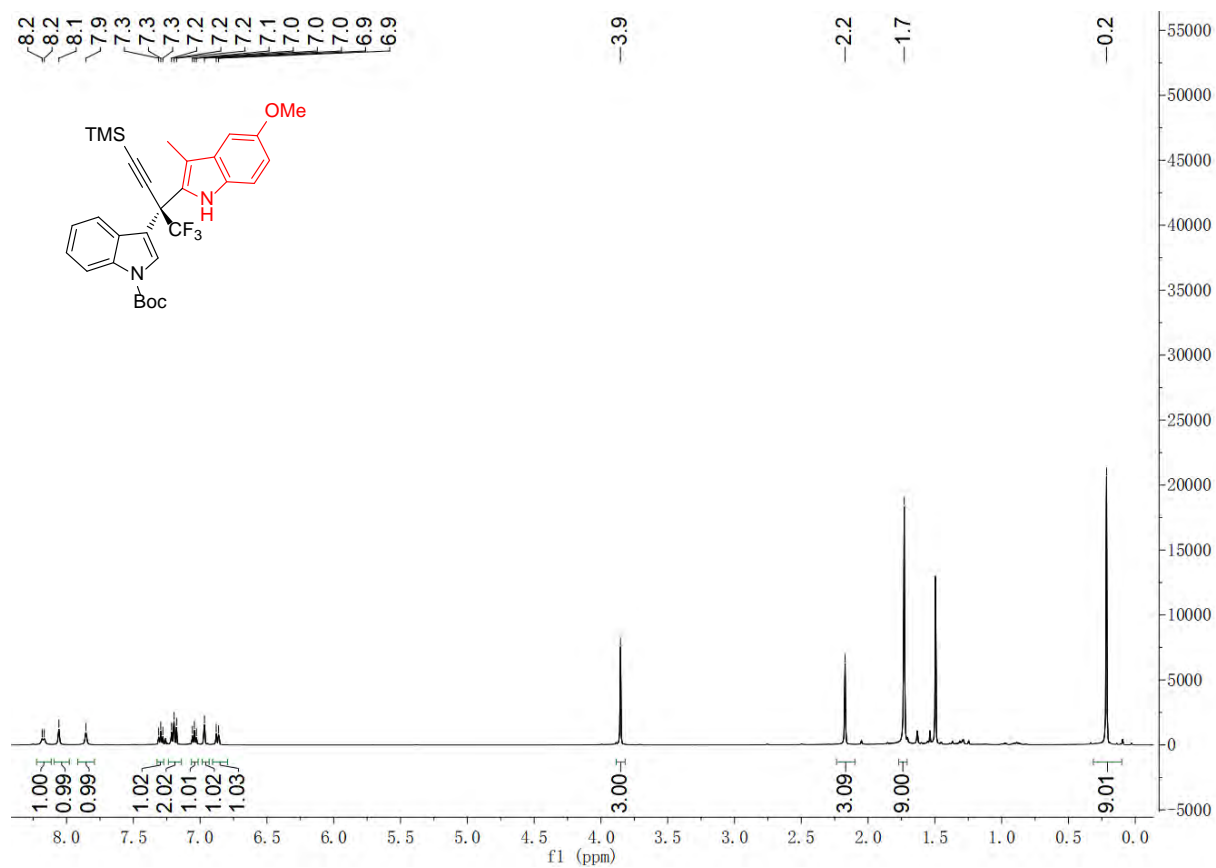

### <sup>13</sup>C NMR of compound 10 (in CDCl<sub>3</sub>)

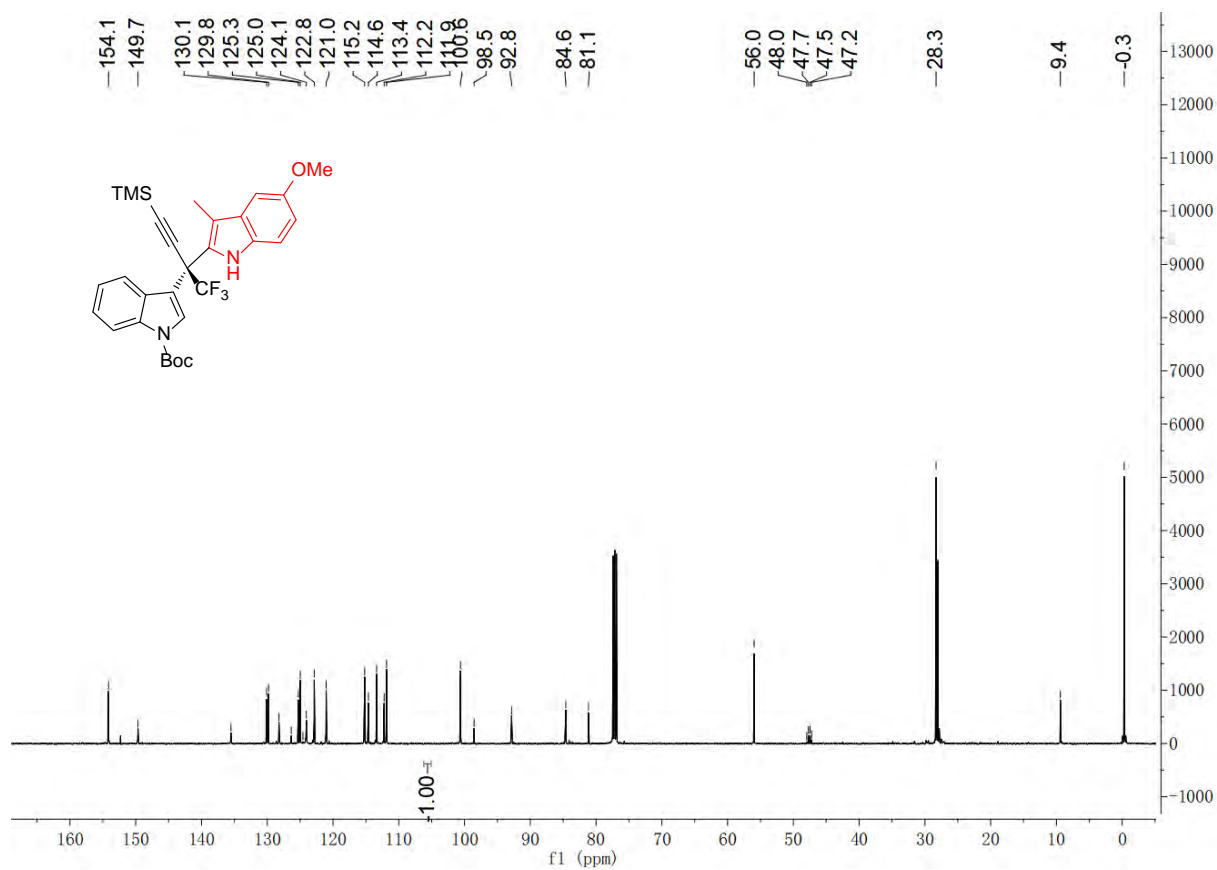

### <sup>19</sup>F NMR of compound 10 (in CDCl<sub>3</sub>)

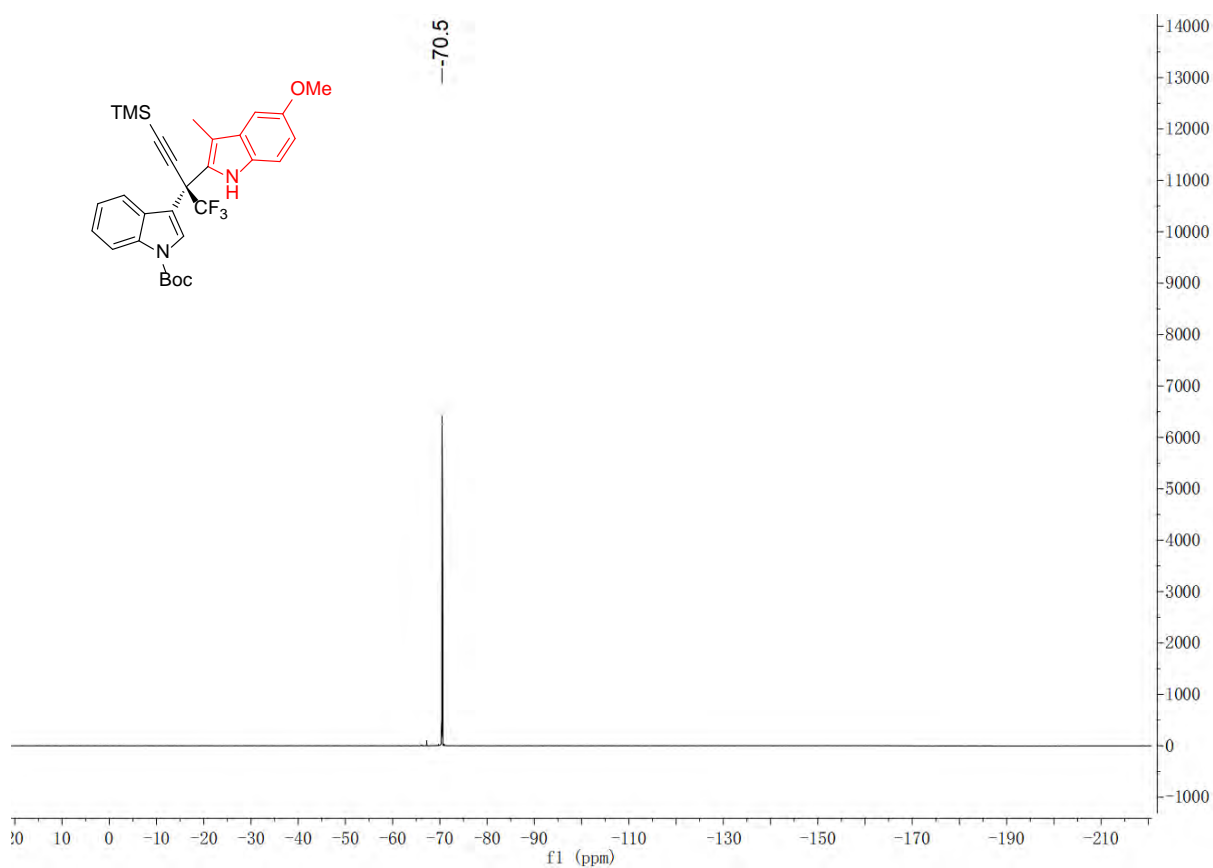

### <sup>1</sup>H NMR of compound 11 (in CDCl<sub>3</sub>)

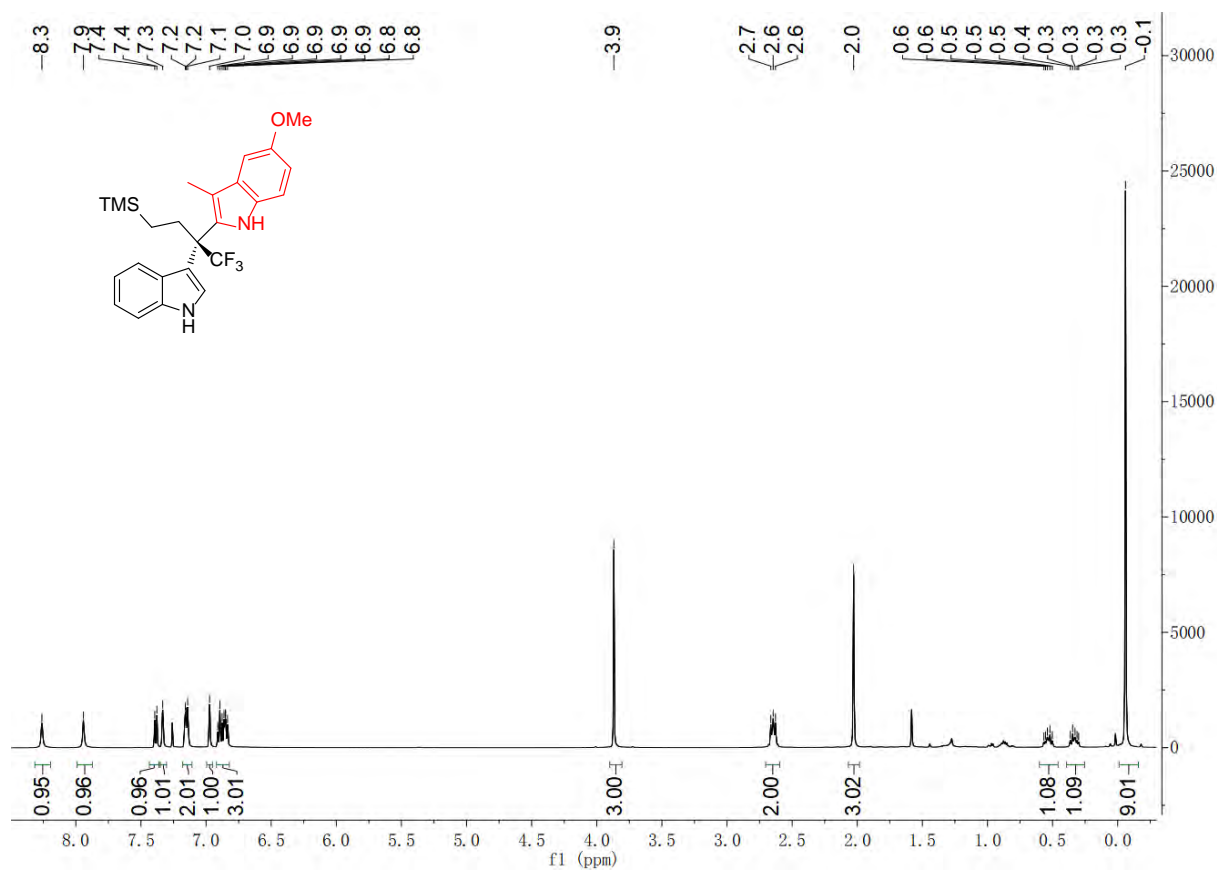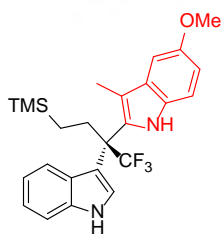

### <sup>13</sup>C NMR of compound 11 (in CDCl<sub>3</sub>)

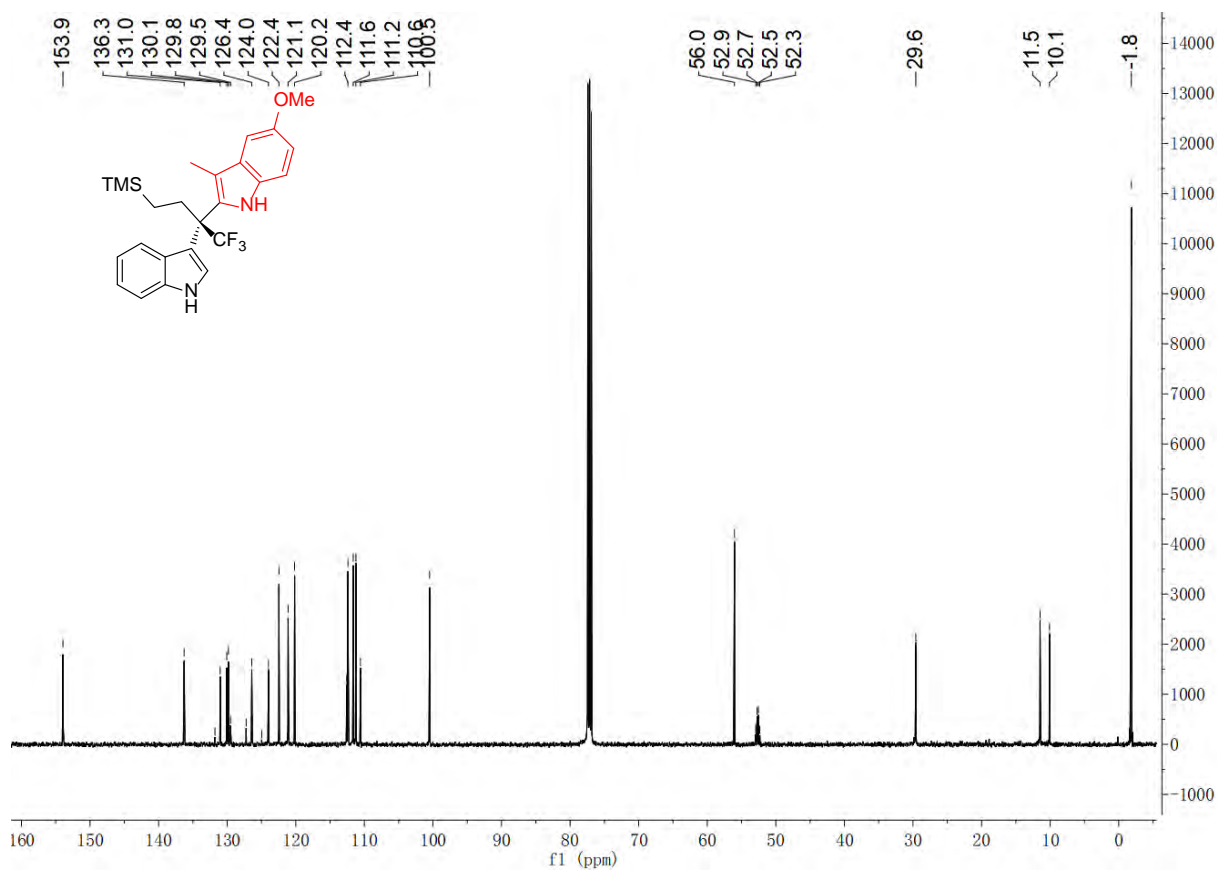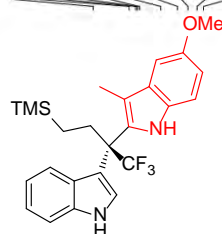



### $^{19}\text{F}$ NMR of compound 11 (in $\text{CDCl}_3$ )

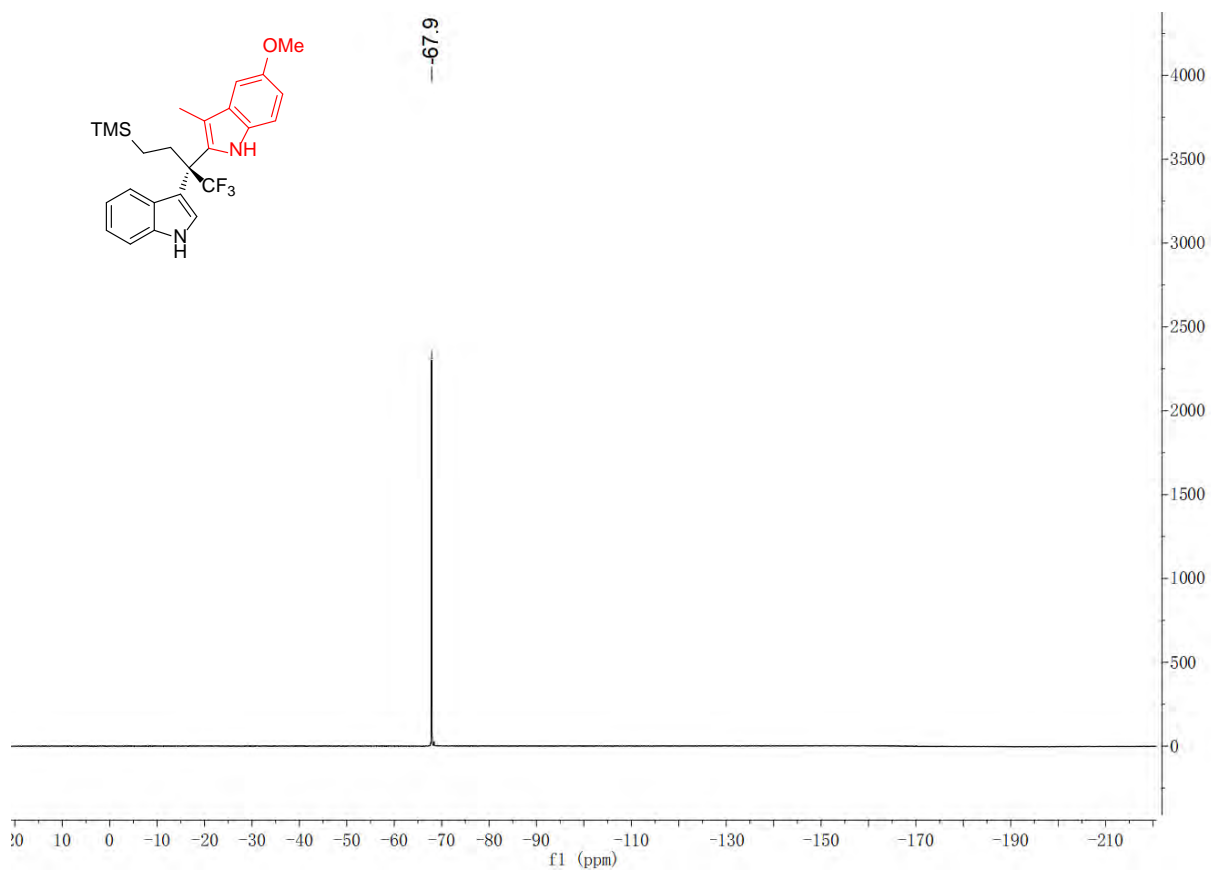

### $^1\text{H}$ NMR of compound 12 (in $\text{CDCl}_3$ )

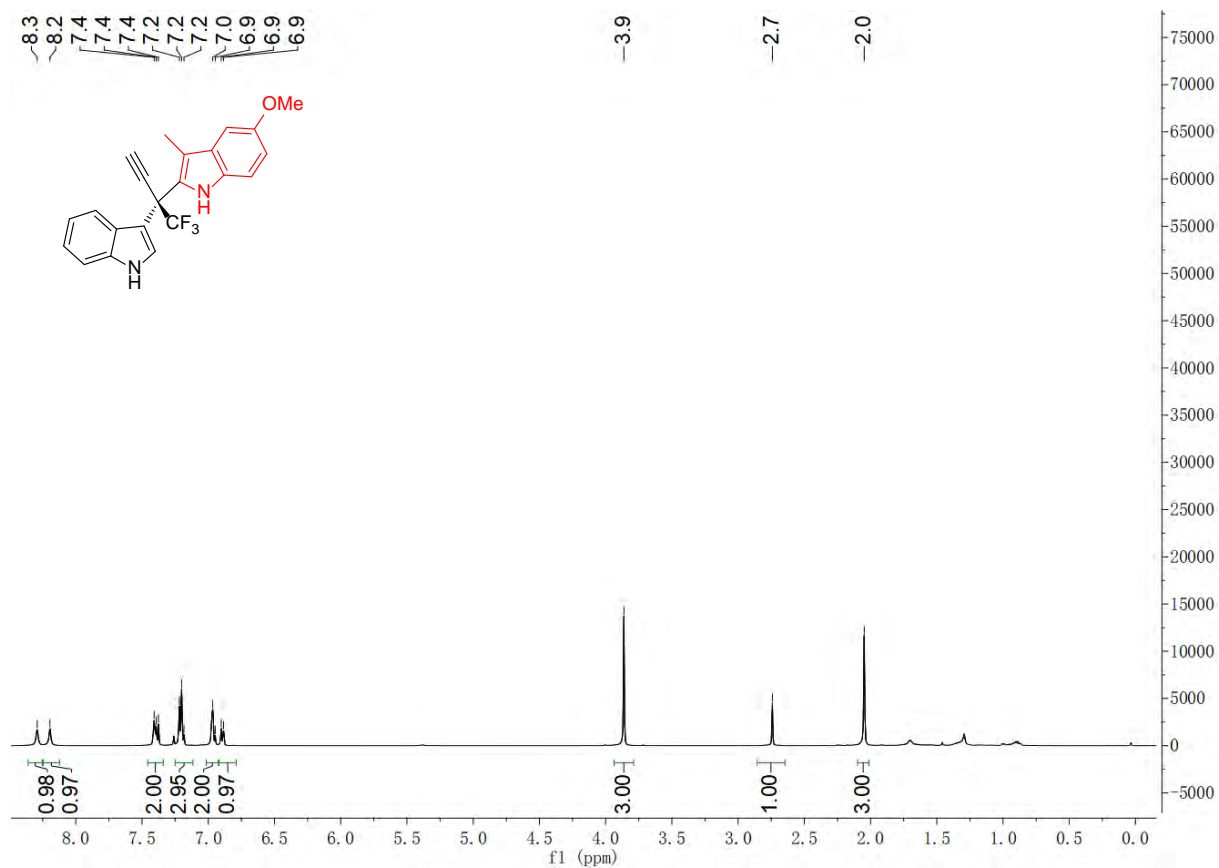

### <sup>13</sup>C NMR of compound 12 (in CDCl<sub>3</sub>)

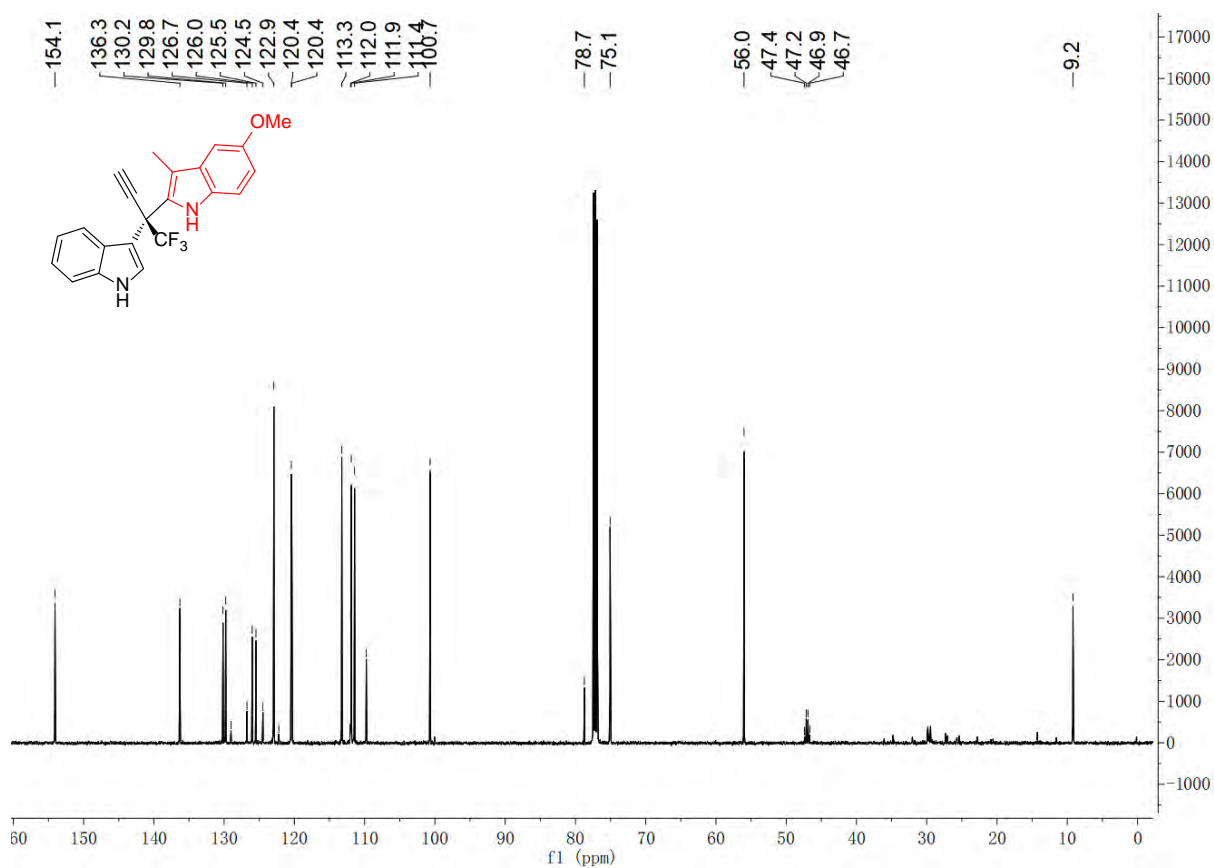

### <sup>19</sup>F NMR of compound 12 (in CDCl<sub>3</sub>)

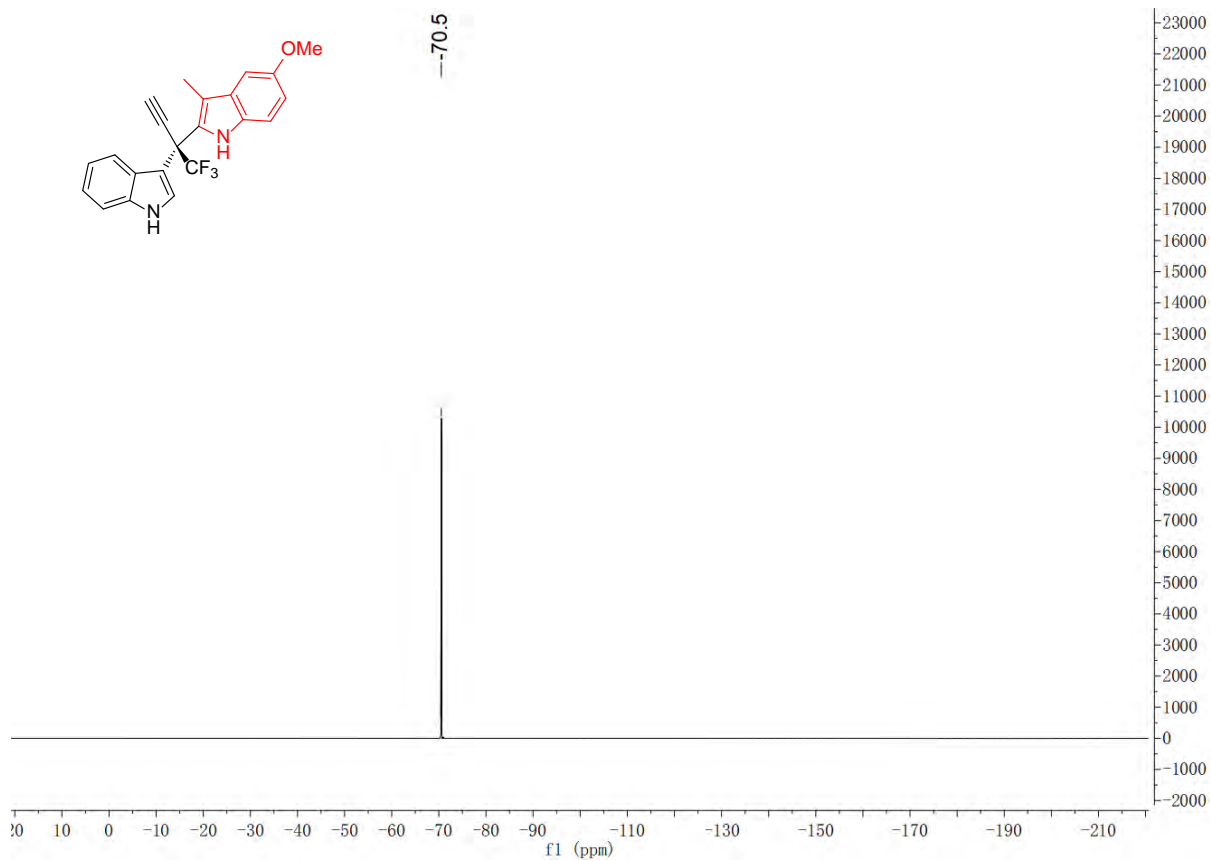

### <sup>1</sup>H NMR of compound 13a (in CDCl<sub>3</sub>)

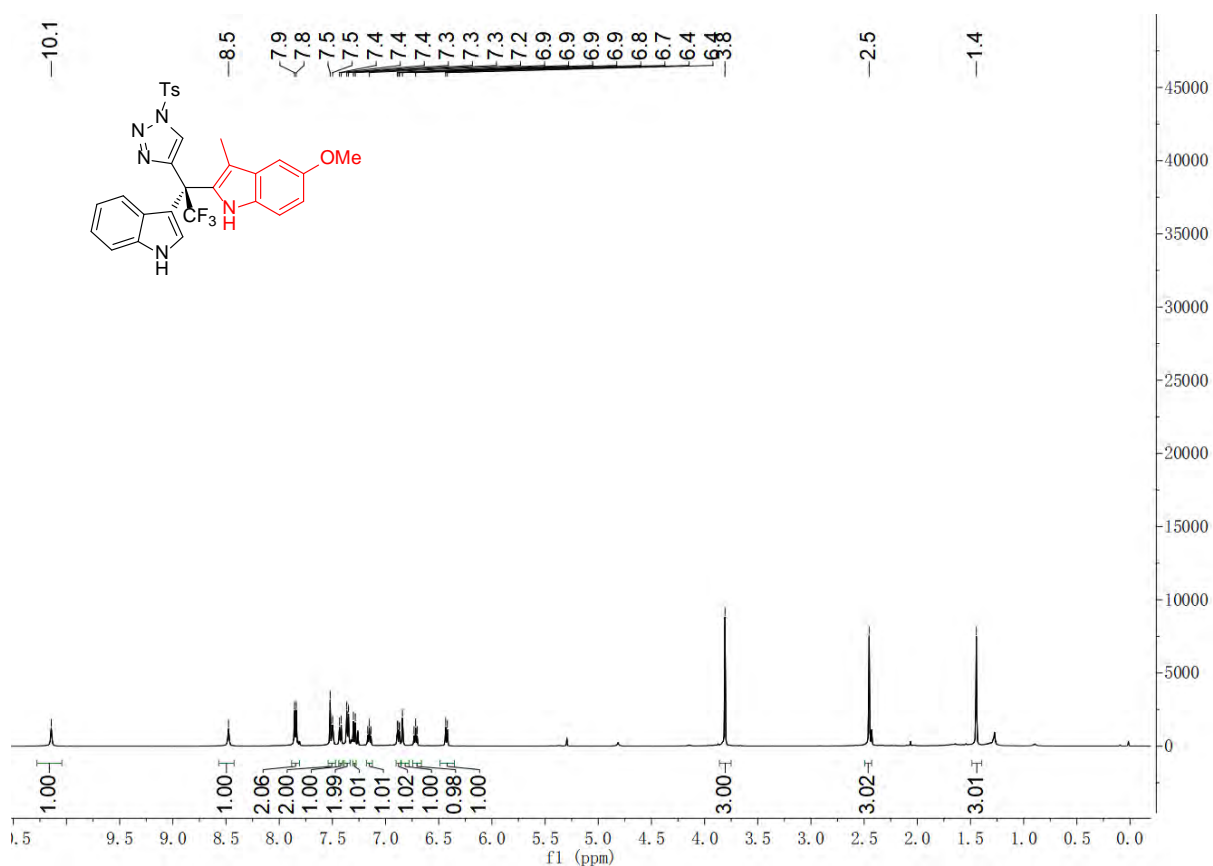

### <sup>13</sup>C NMR of compound 13a (in CDCl<sub>3</sub>)

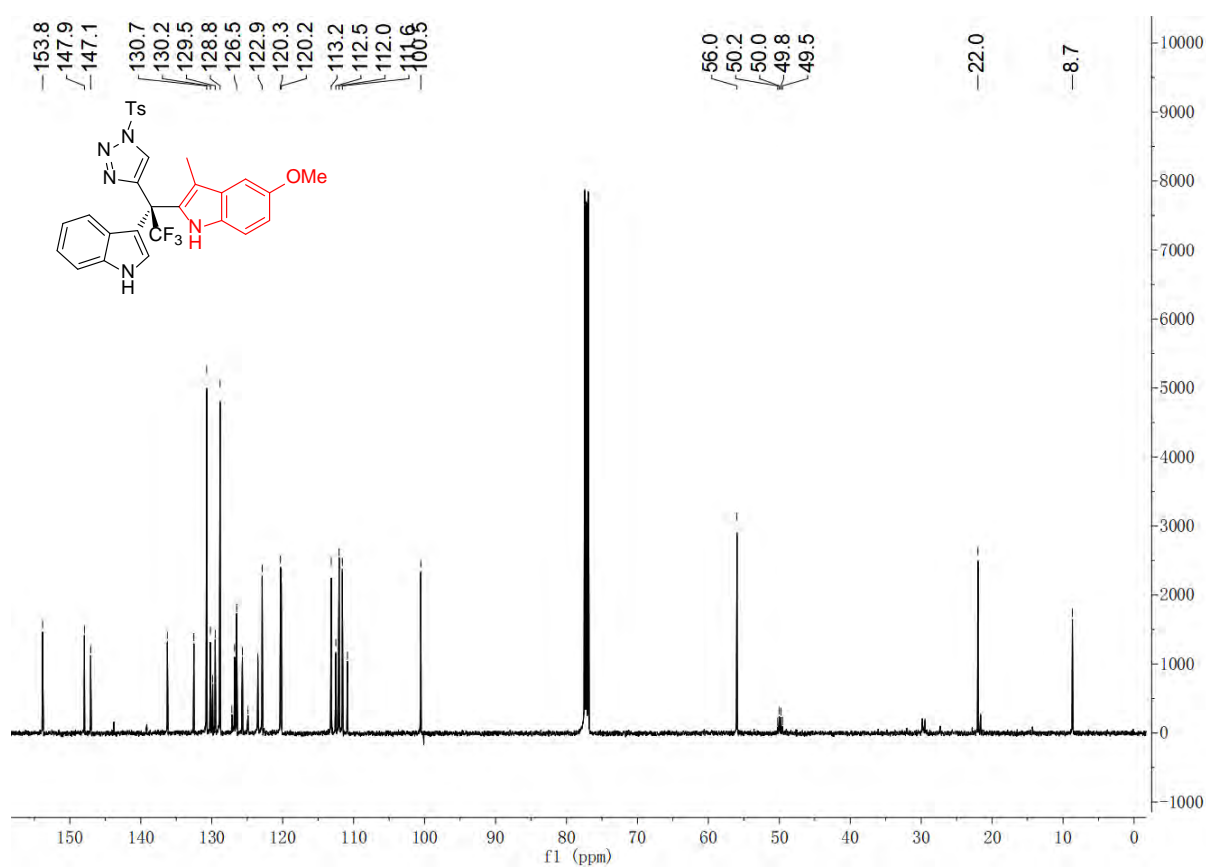

### <sup>19</sup>F NMR of compound 13a (in CDCl<sub>3</sub>)

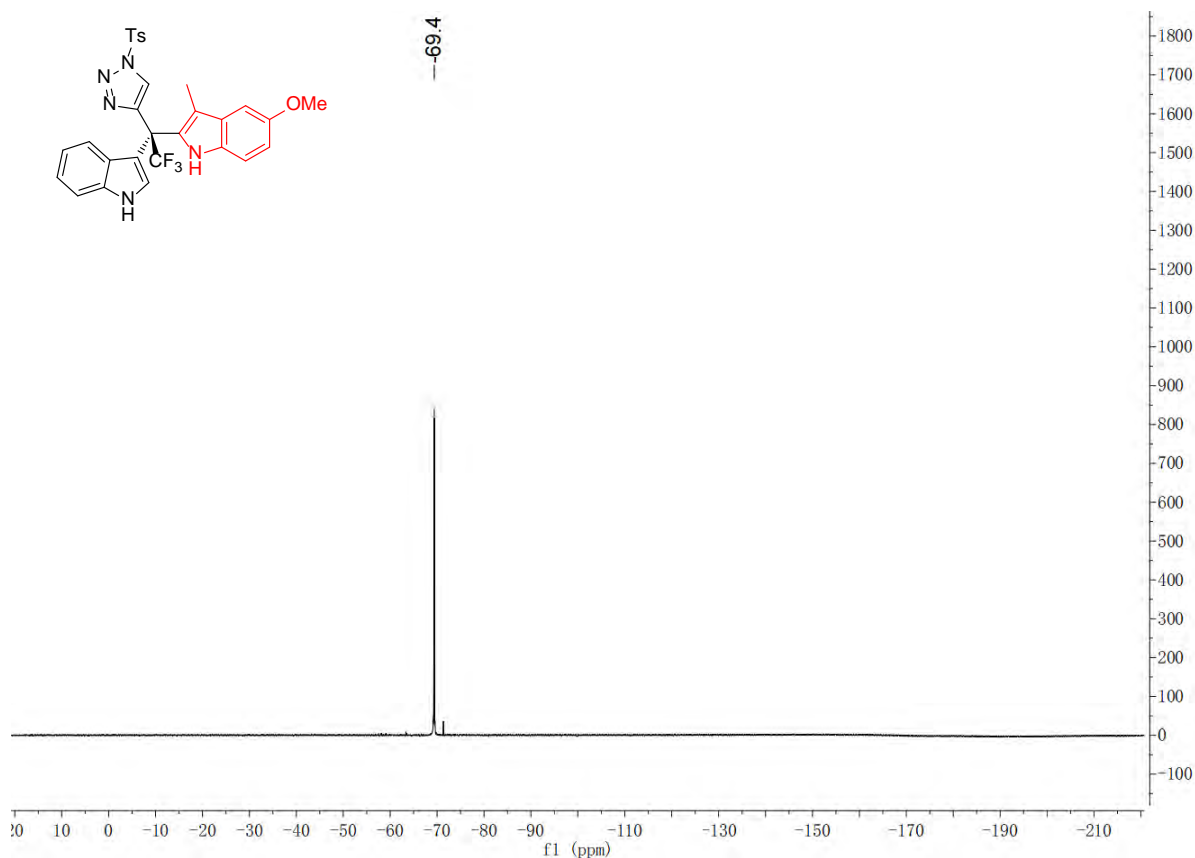

### <sup>1</sup>H NMR of compound 13b (in CDCl<sub>3</sub>)

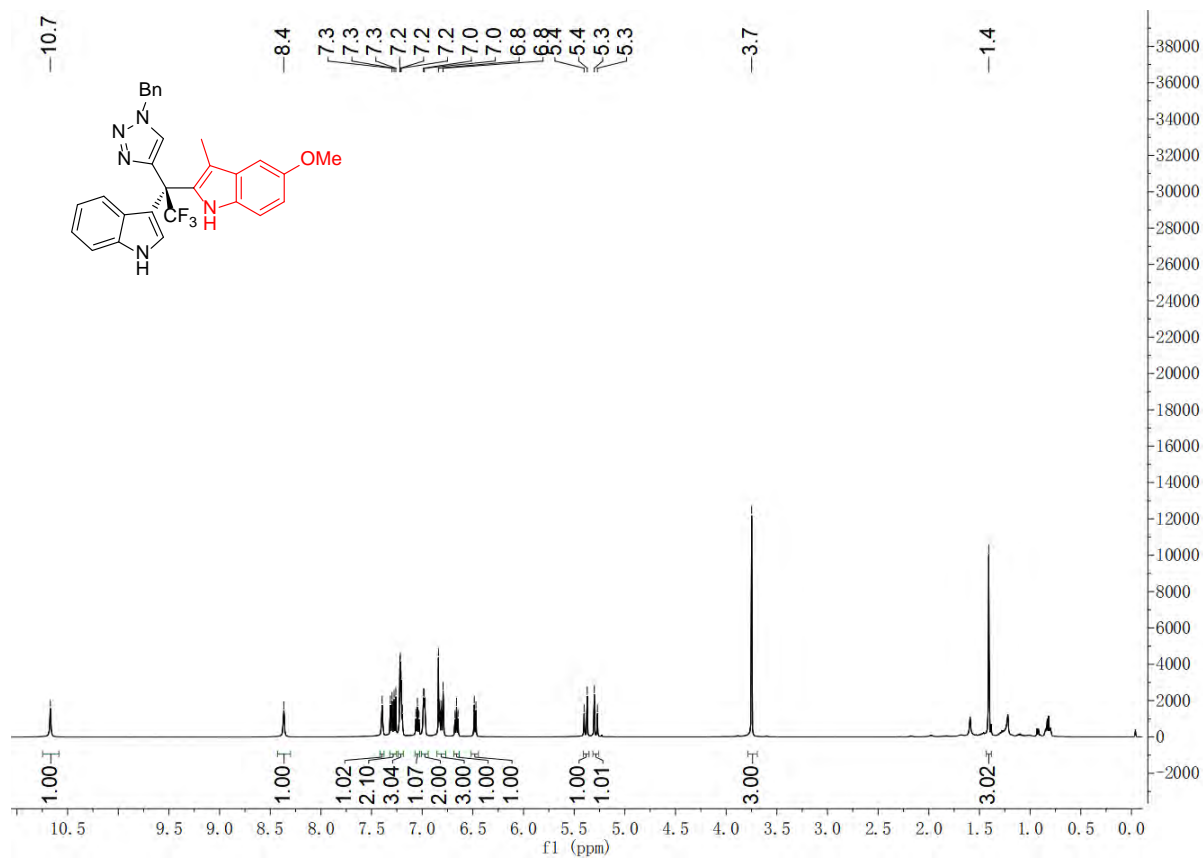



### <sup>1</sup>H NMR of compound 13c (in CDCl<sub>3</sub>)

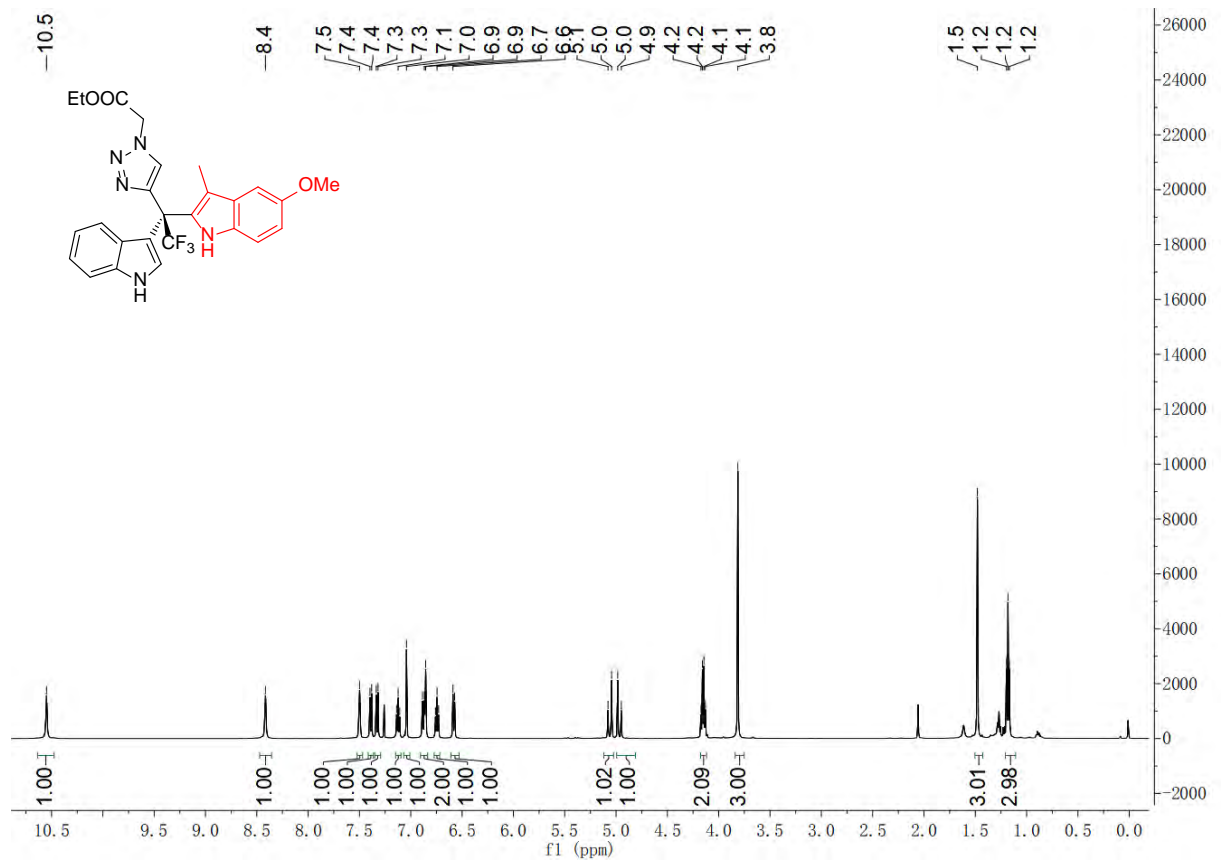

### <sup>13</sup>C NMR of compound 13c (in CDCl<sub>3</sub>)

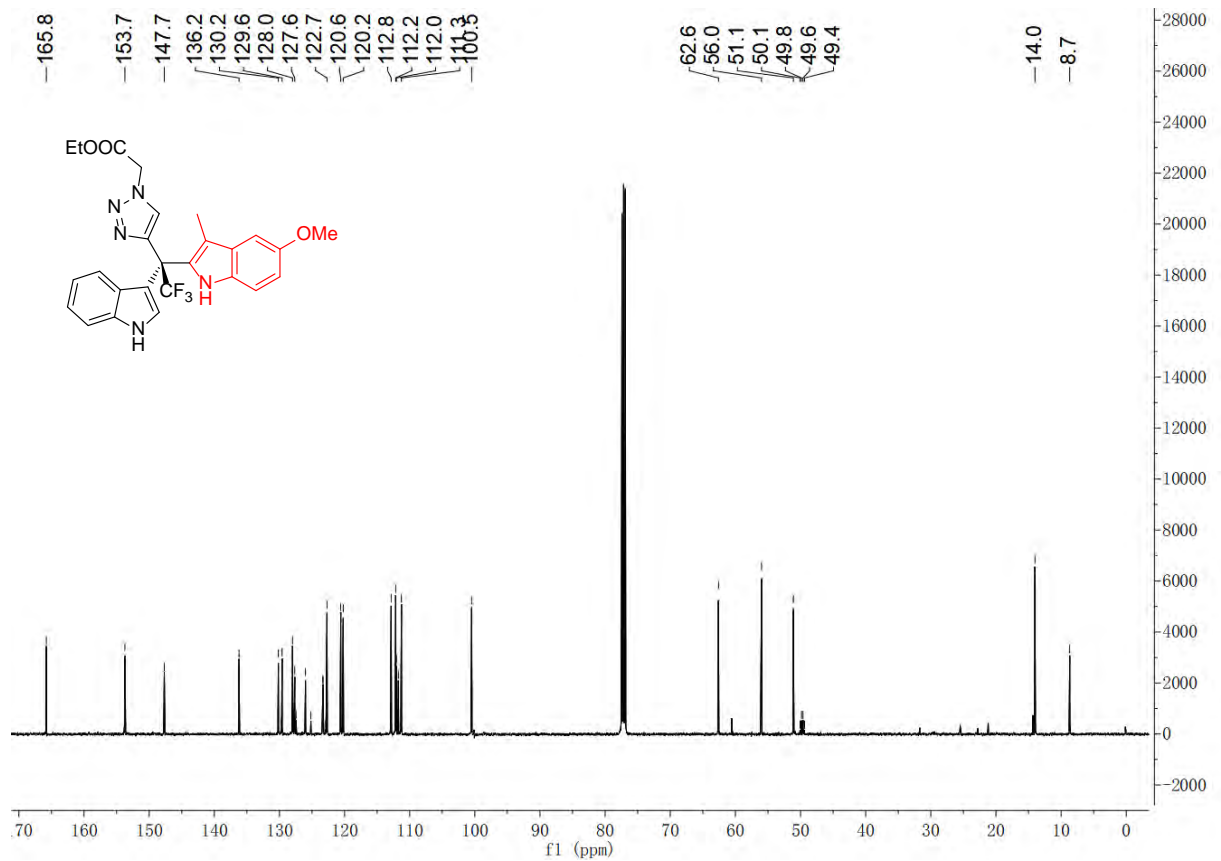

**<sup>19</sup>F NMR of compound 13c (in CDCl<sub>3</sub>)**

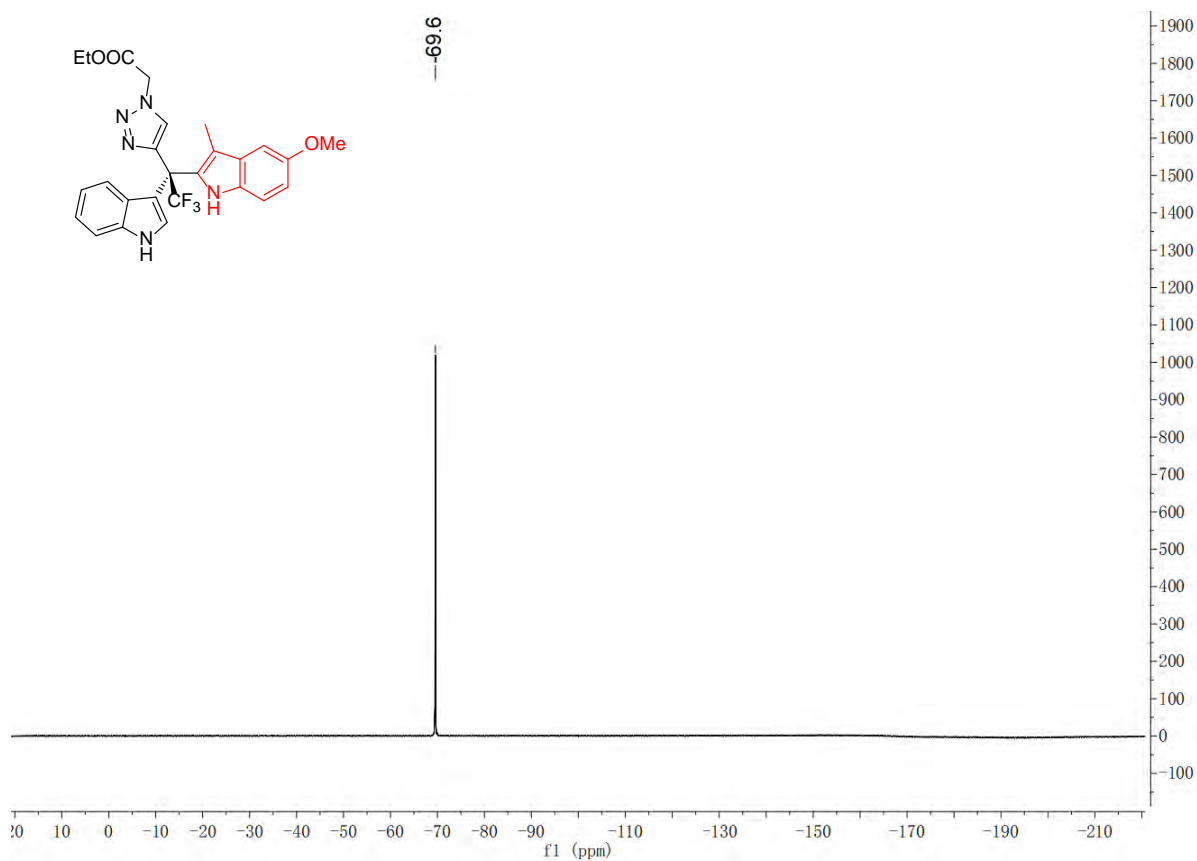

**<sup>1</sup>H NMR of compound 14 (in CDCl<sub>3</sub>)**

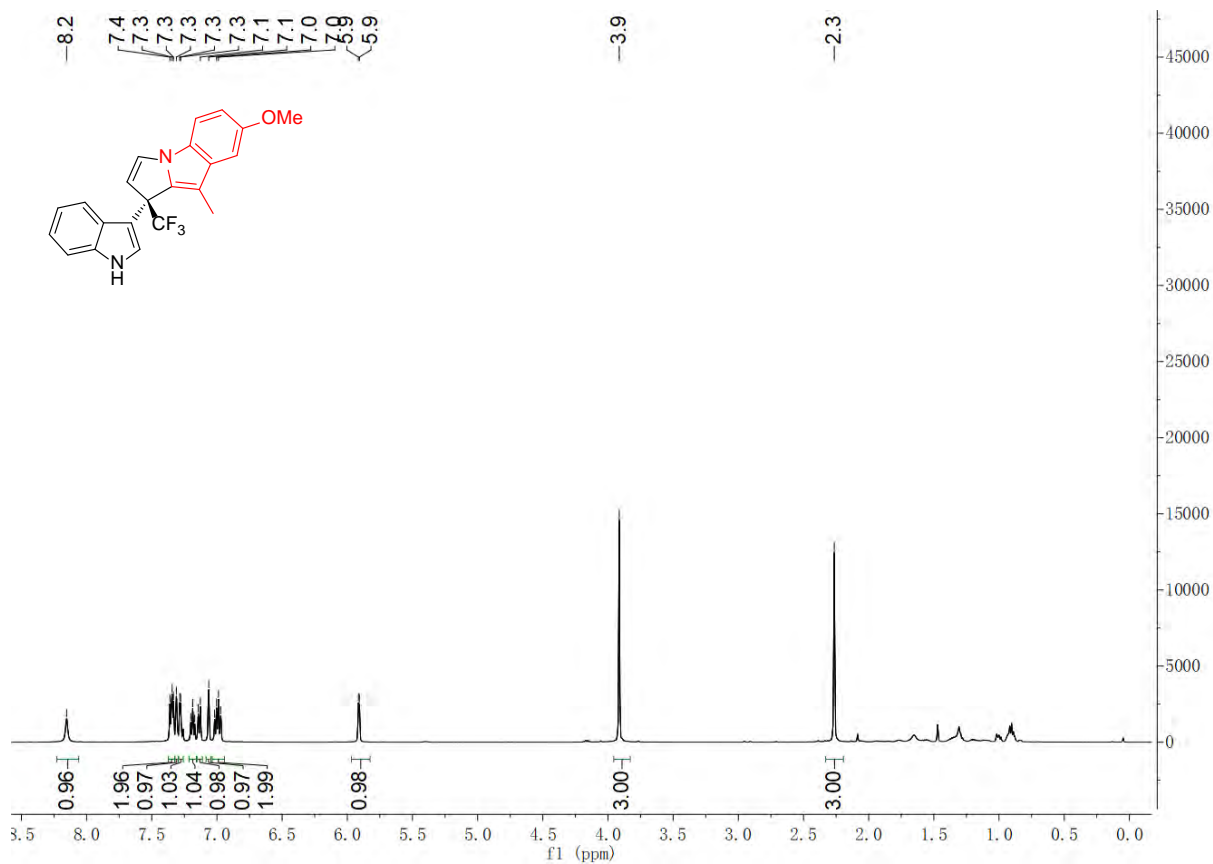

### <sup>13</sup>C NMR of compound 14 (in CDCl<sub>3</sub>)

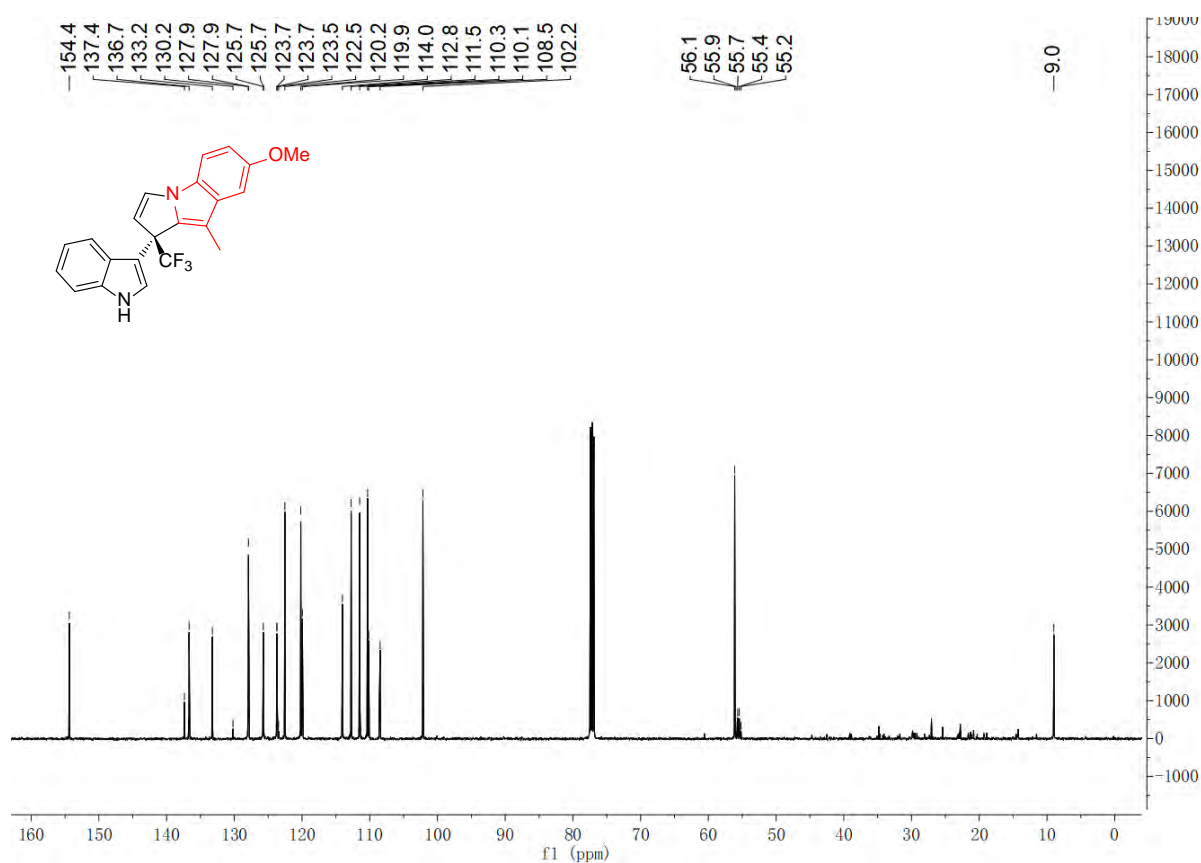

### <sup>19</sup>F NMR of compound 14 (in CDCl<sub>3</sub>)

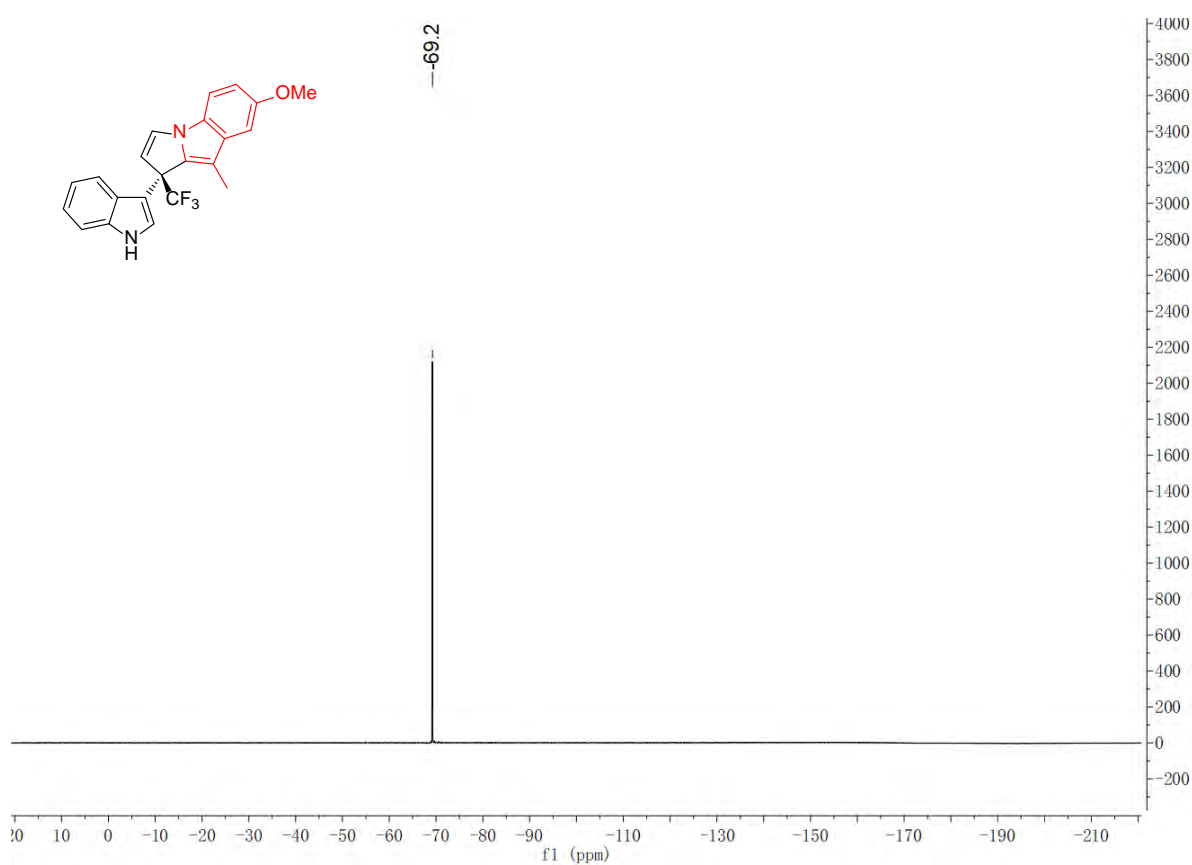



### <sup>1</sup>H NMR of compound 15 (in CDCl<sub>3</sub>)

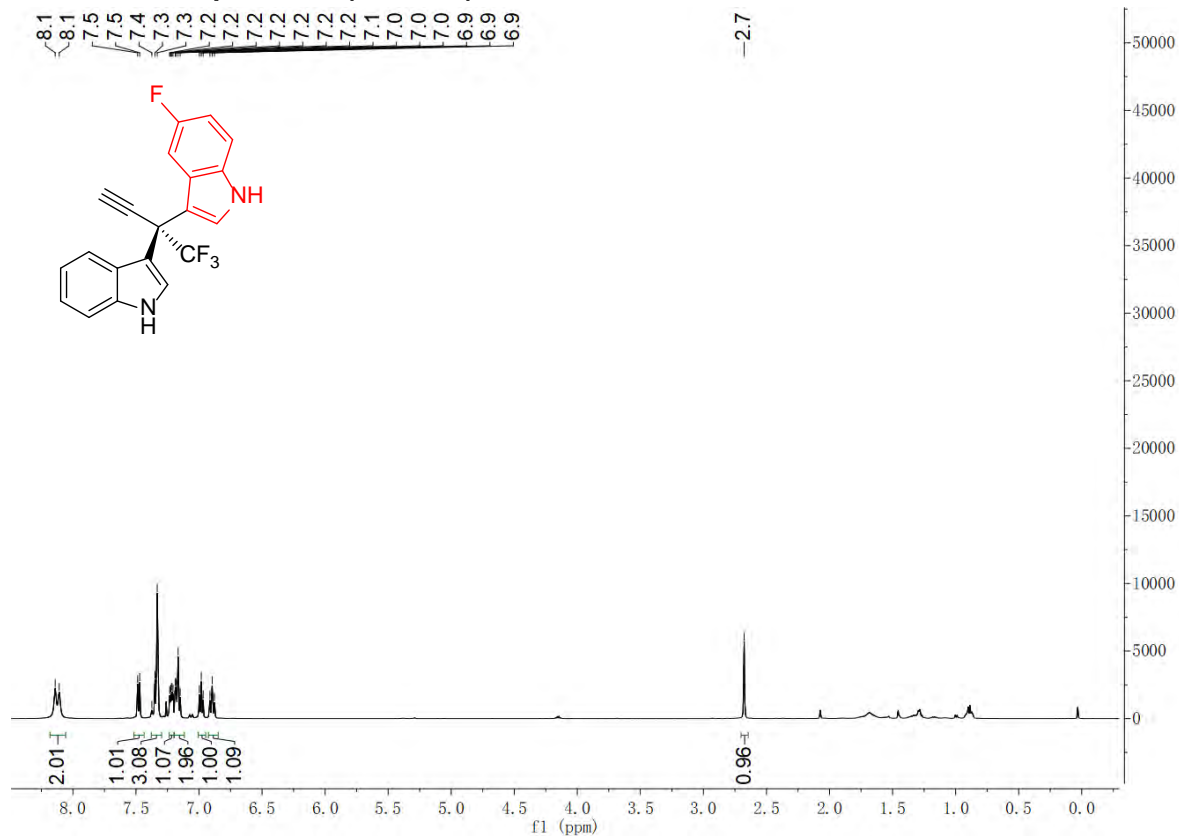

### <sup>13</sup>C NMR of compound 15 (in CDCl<sub>3</sub>)

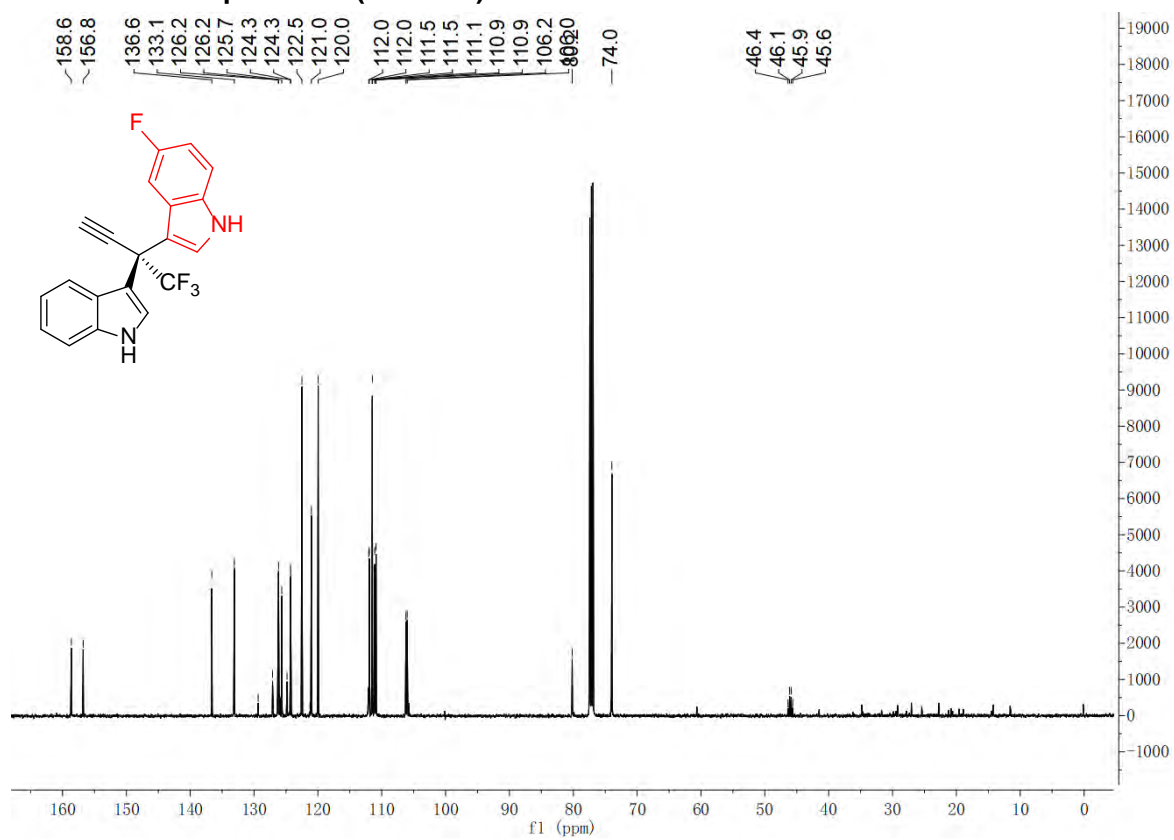

**<sup>19</sup>F NMR of compound 15 (in CDCl<sub>3</sub>)**

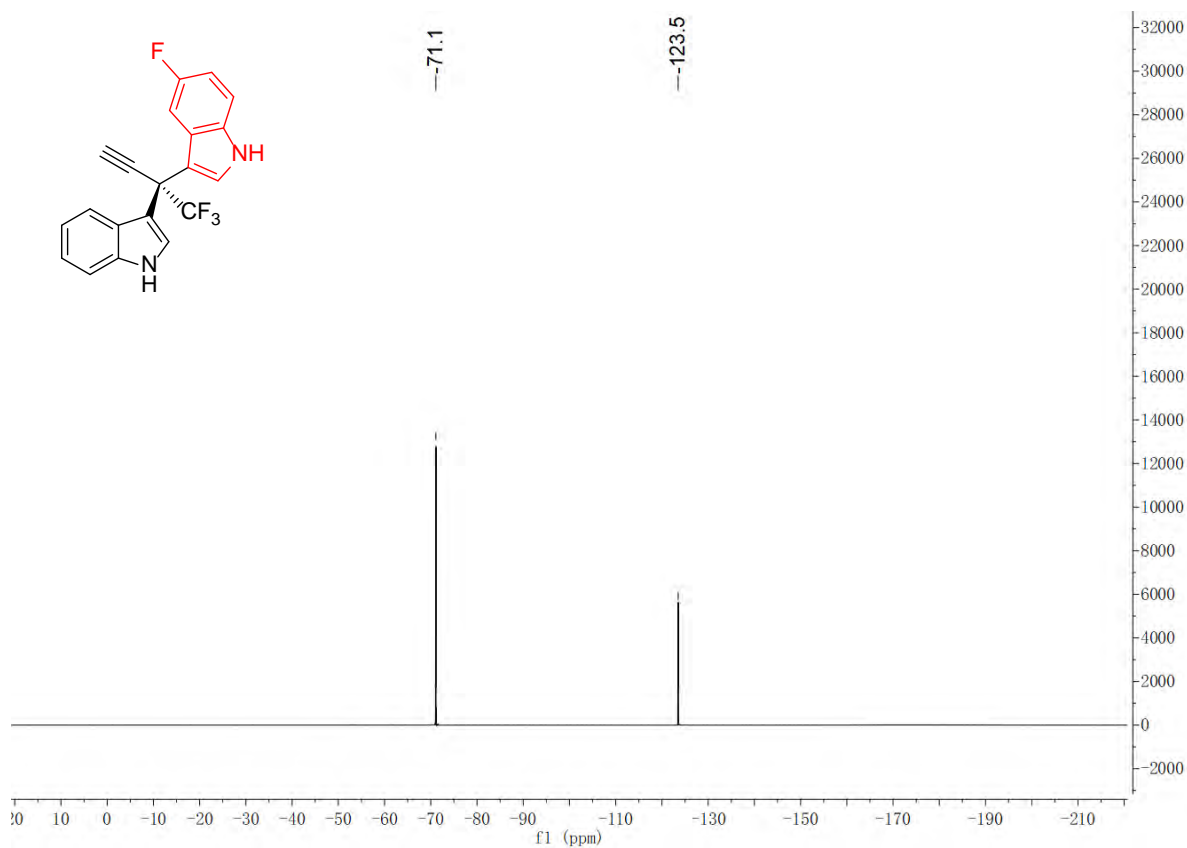

**<sup>1</sup>H NMR of compound 16 (in CDCl<sub>3</sub>)**

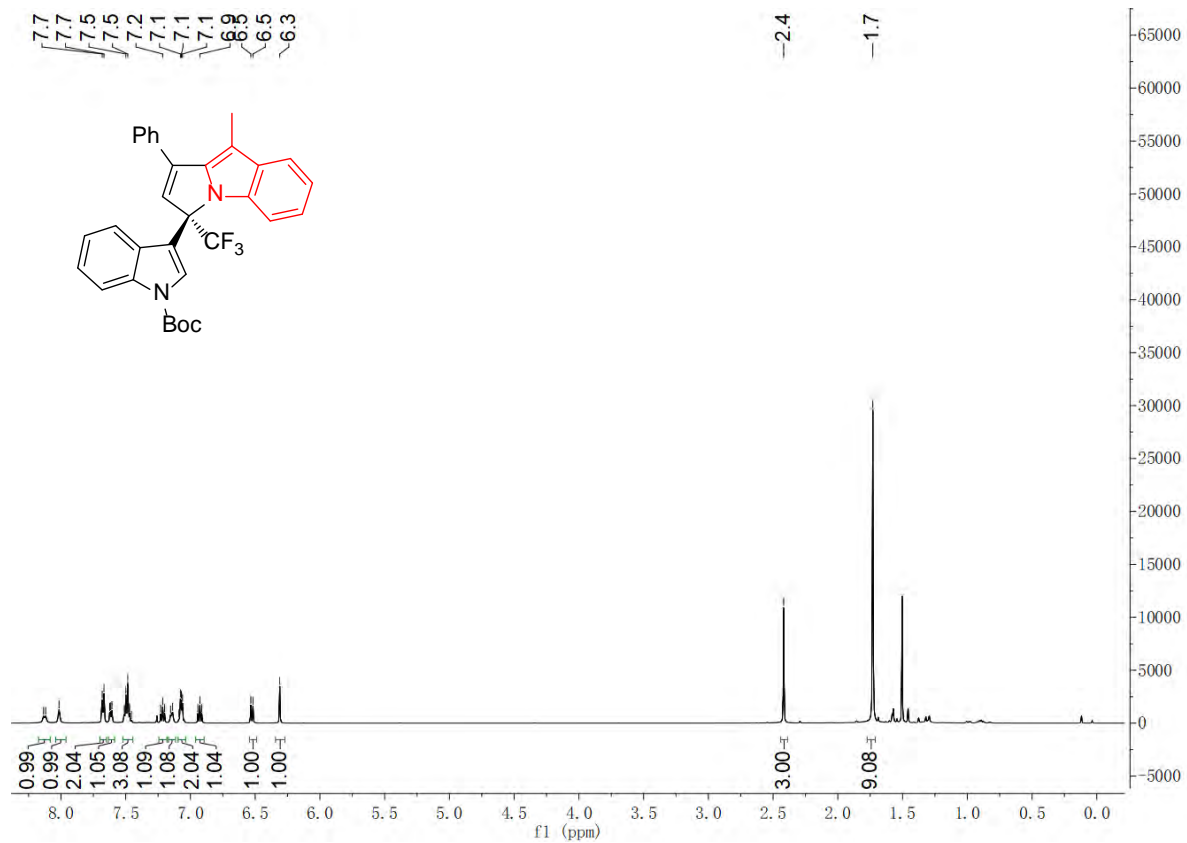

**<sup>13</sup>C NMR of compound 16 (in CDCl<sub>3</sub>)**

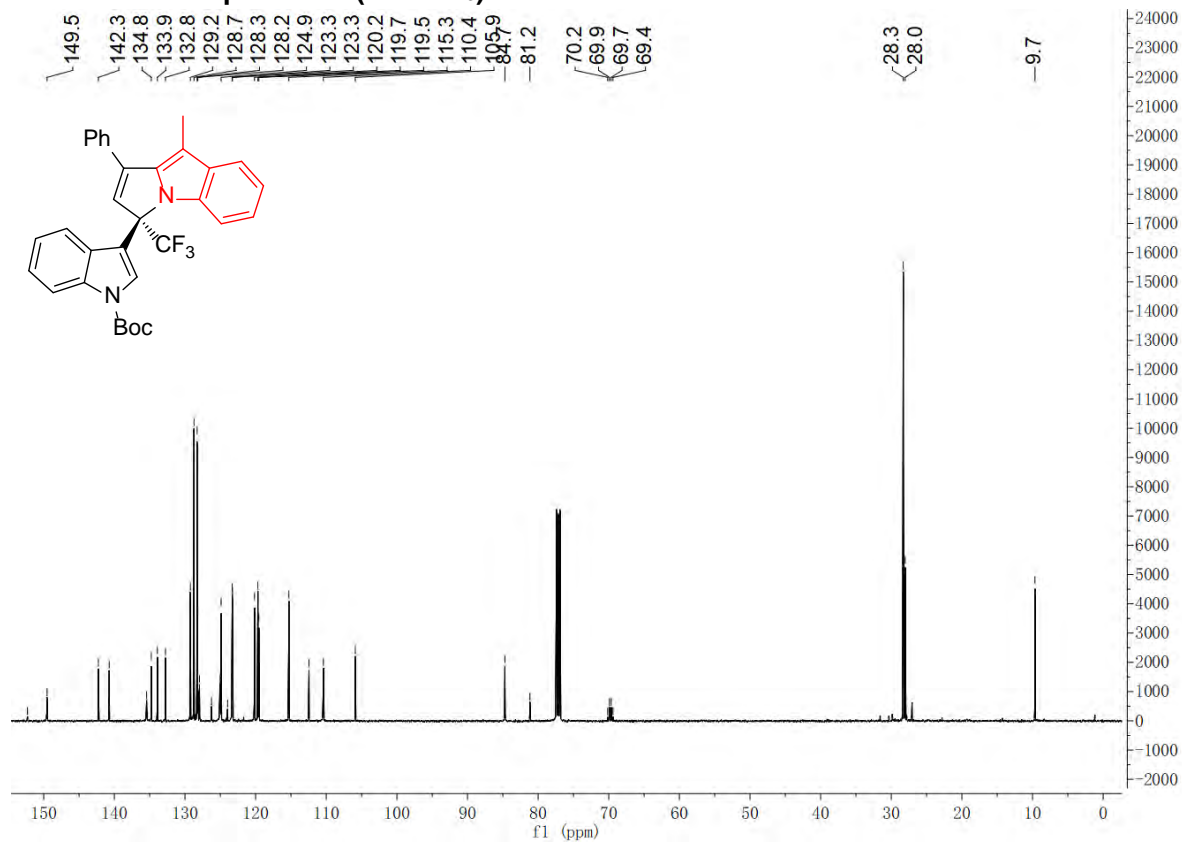

**<sup>19</sup>F NMR of compound 16 (in CDCl<sub>3</sub>)**

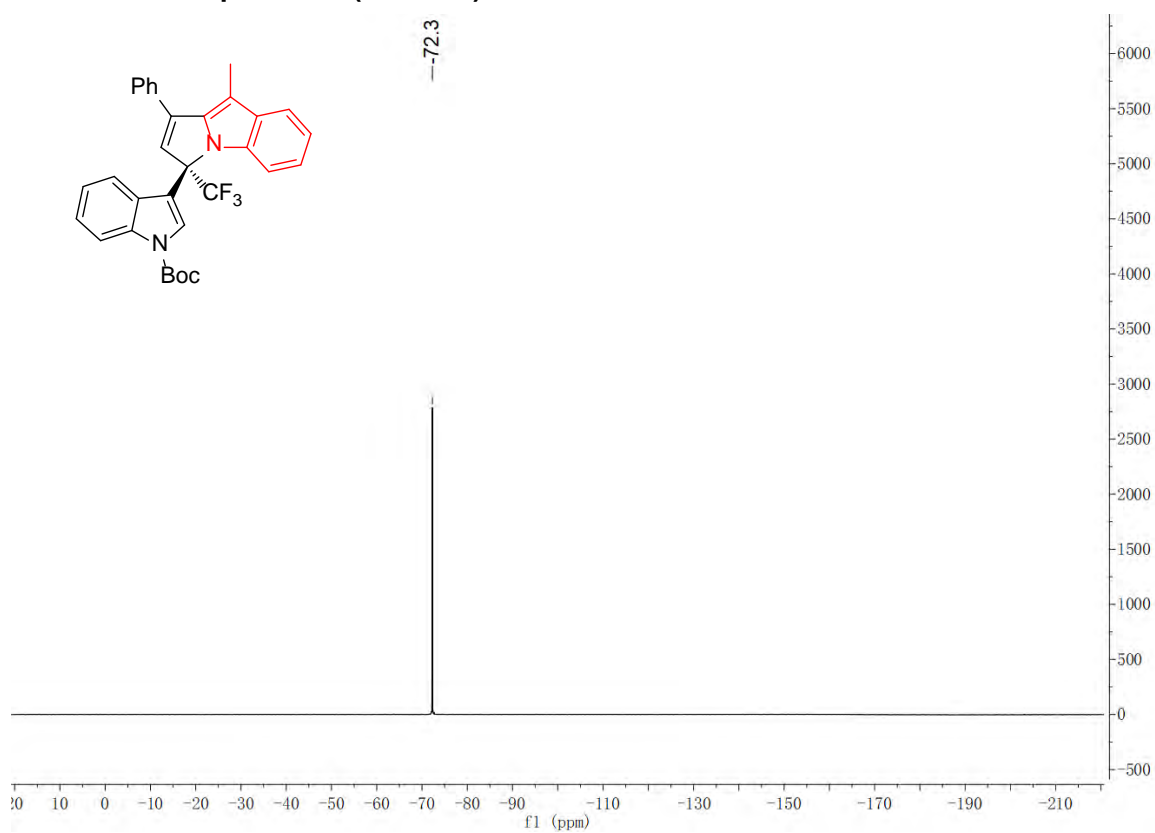

### <sup>1</sup>H NMR of compound 17 (in CDCl<sub>3</sub>)

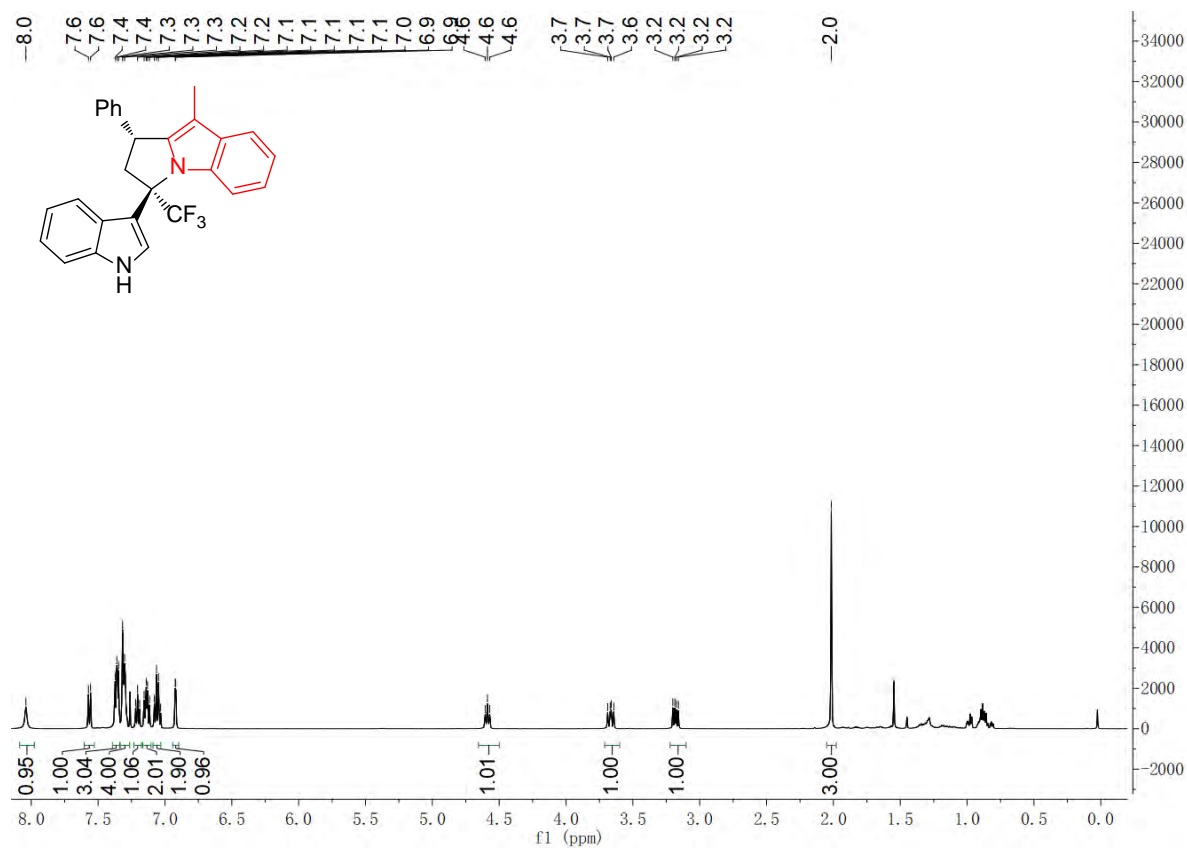

### <sup>13</sup>C NMR of compound 17 (in CDCl<sub>3</sub>)

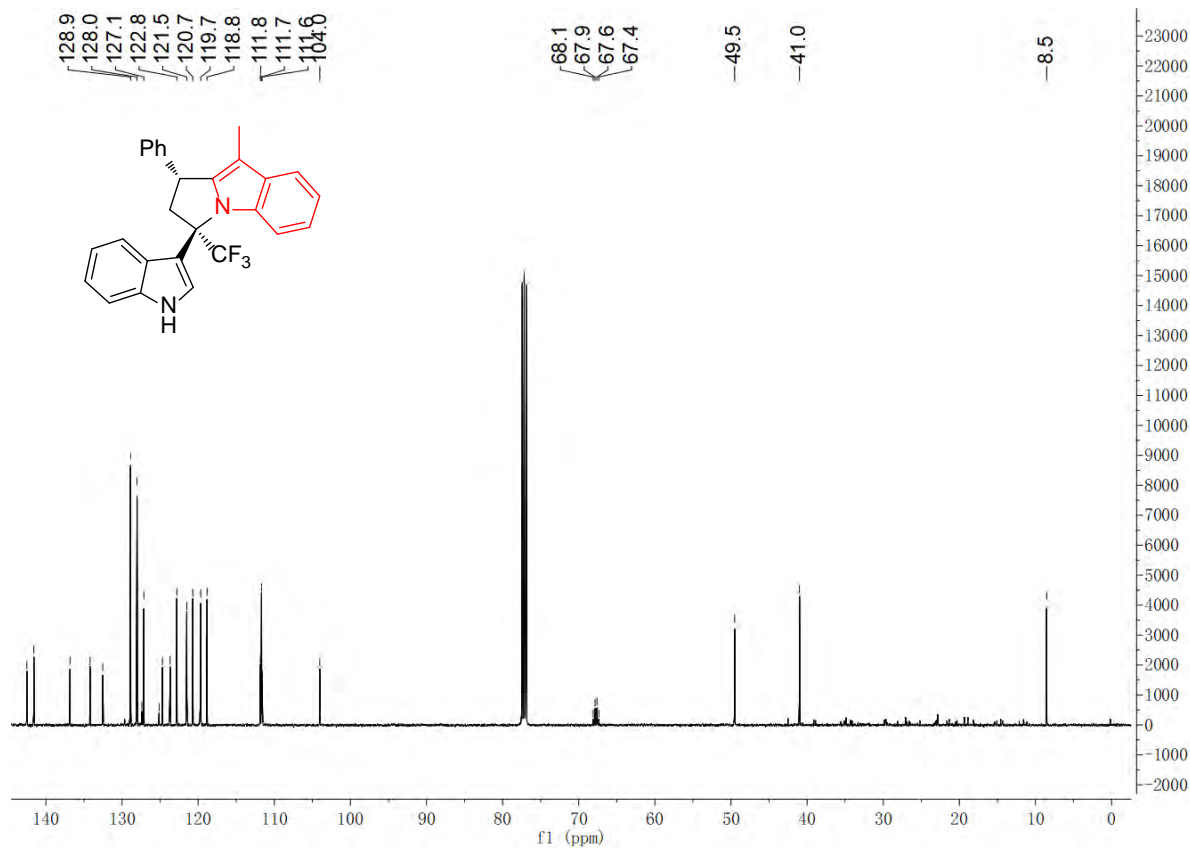

**<sup>19</sup>F NMR of compound 17 (in CDCl<sub>3</sub>)**

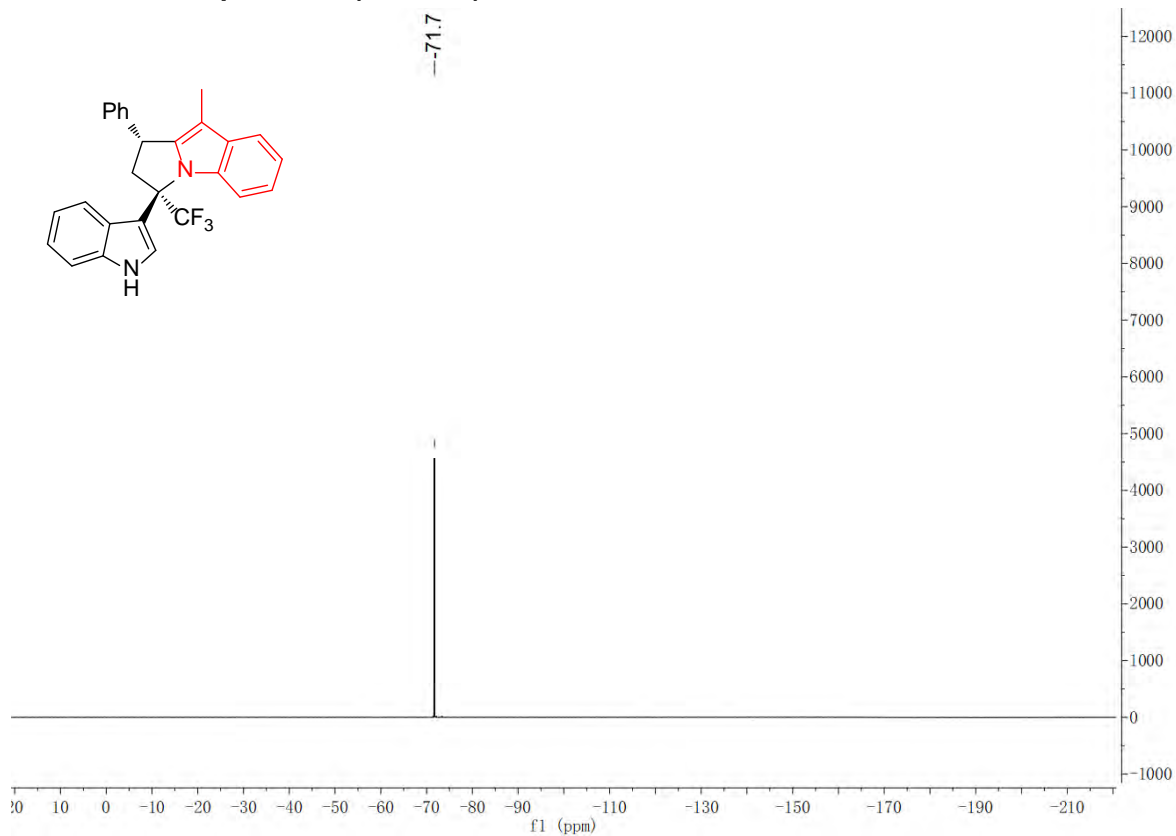

**<sup>1</sup>H NMR of compound 18 (in CDCl<sub>3</sub>)**

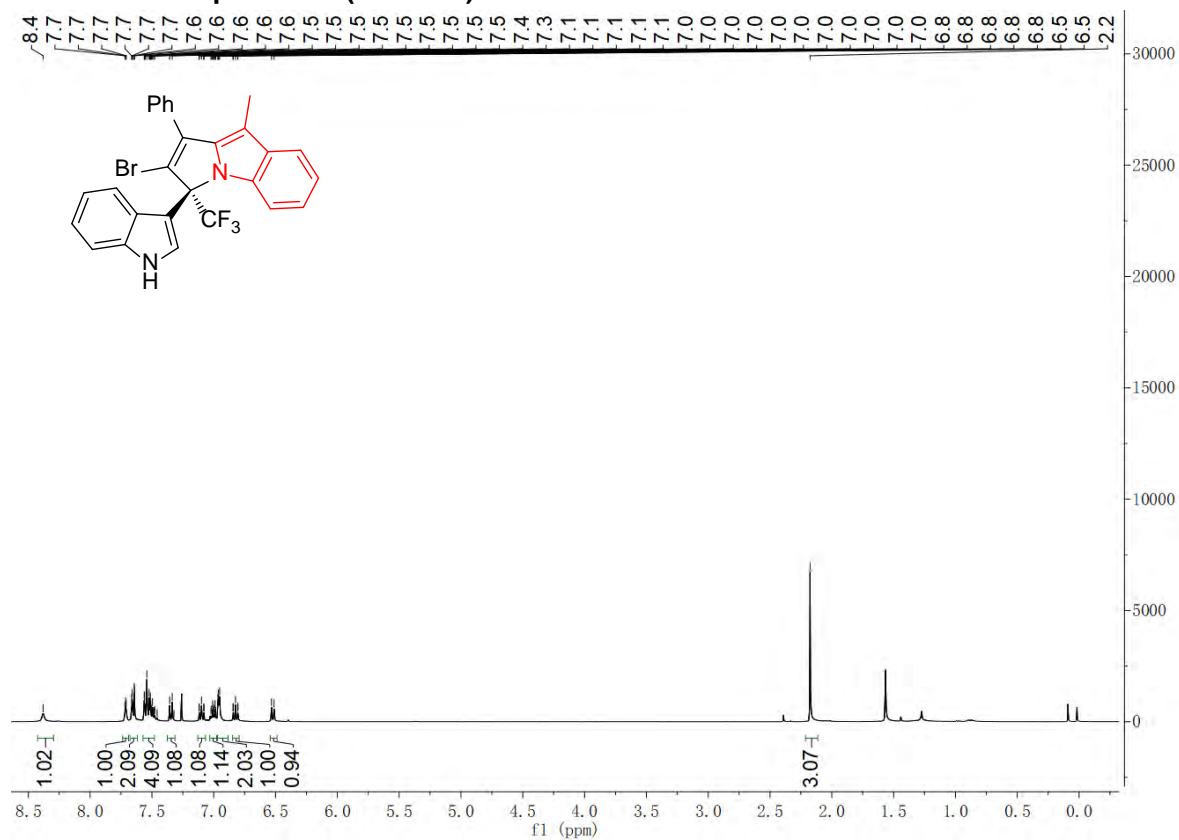

**<sup>13</sup>C NMR of compound 18 (in CDCl<sub>3</sub>)**

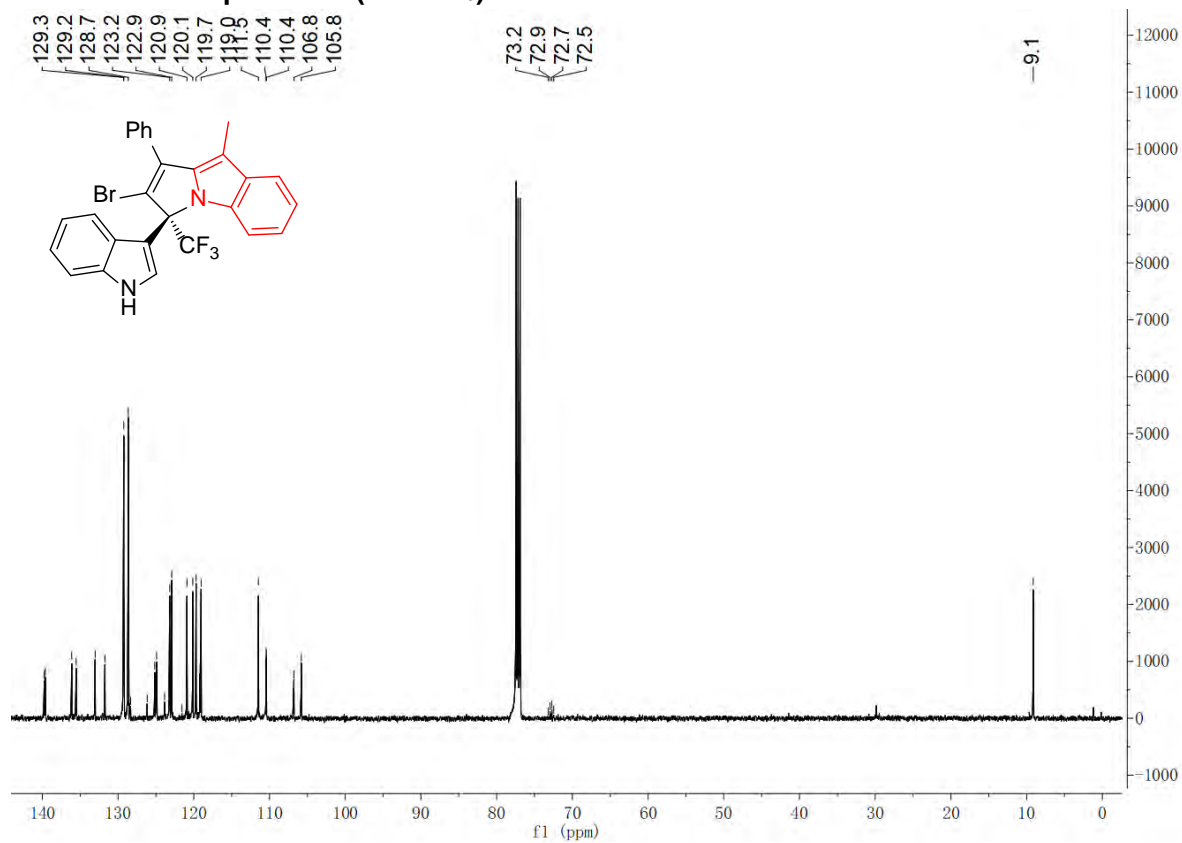

**<sup>19</sup>F NMR of compound 18 (in CDCl<sub>3</sub>)**

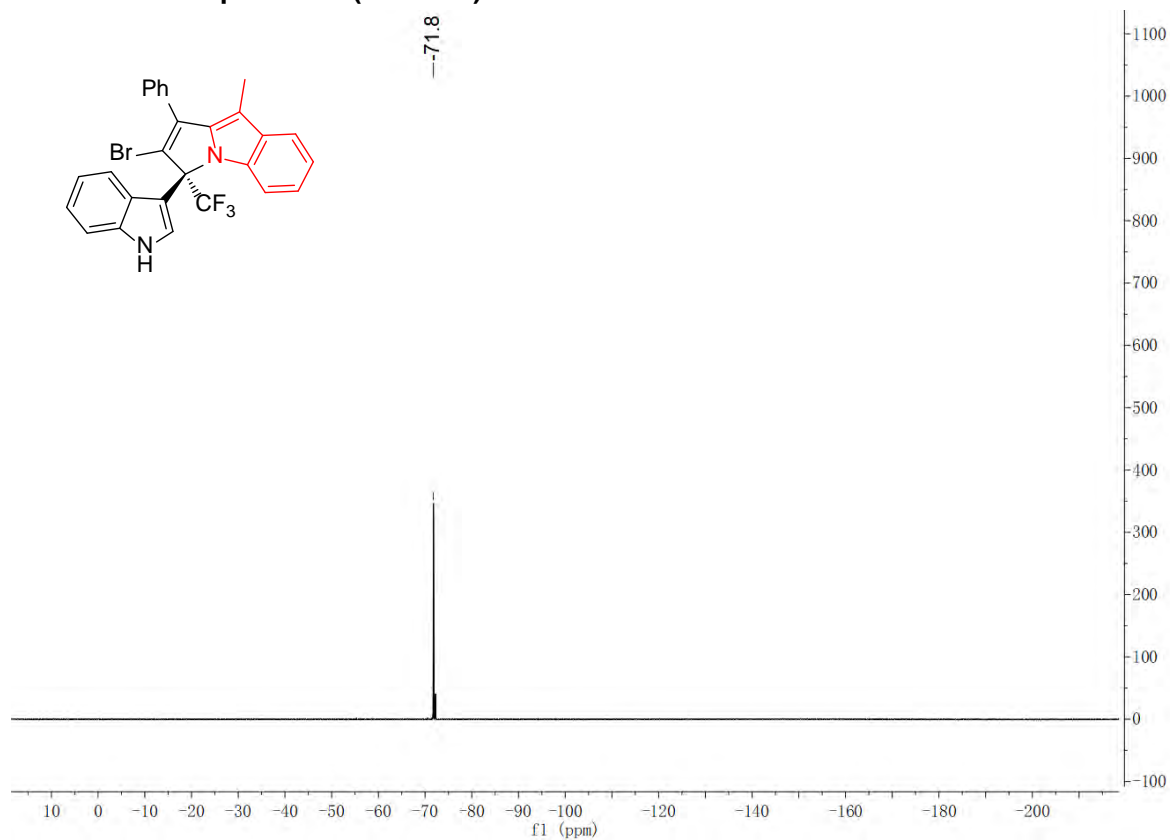

### <sup>1</sup>H NMR of compound 8a (in CDCl<sub>3</sub>)

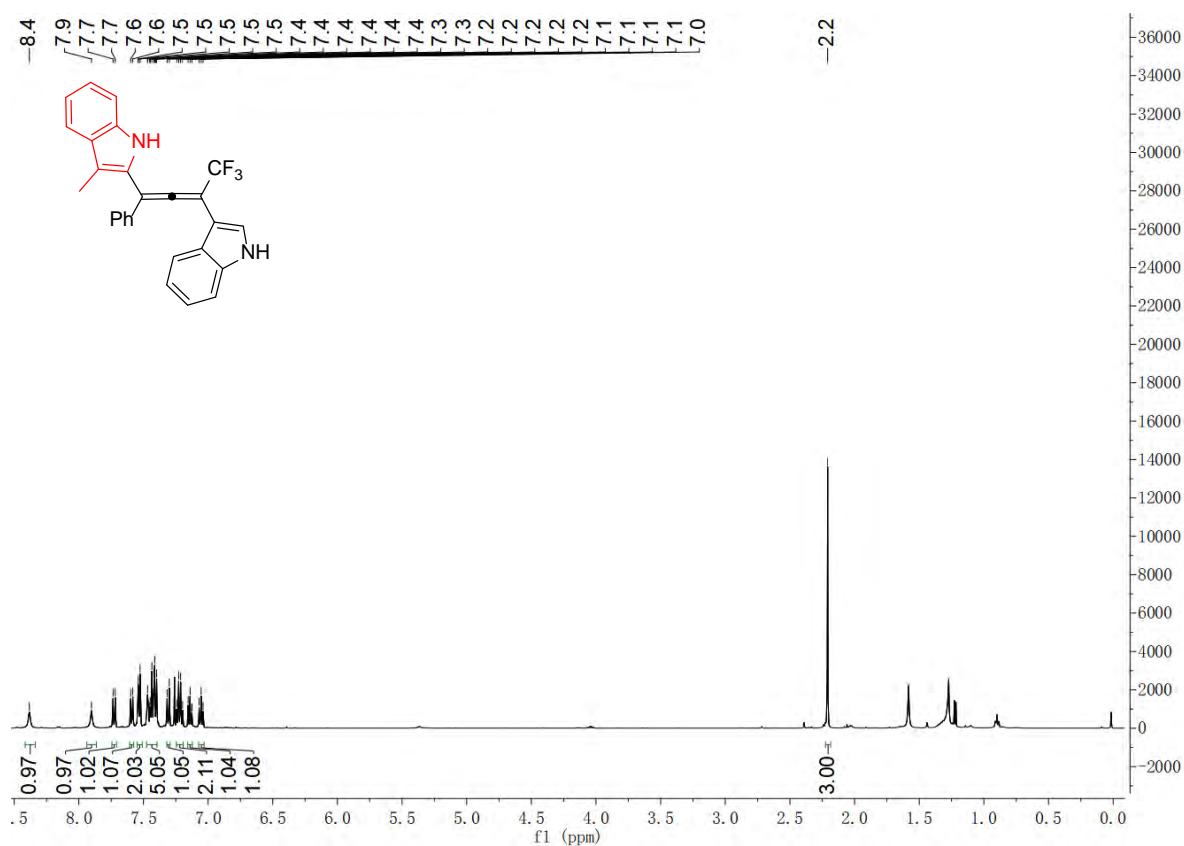

### <sup>13</sup>C NMR of compound 8a (in CDCl<sub>3</sub>)

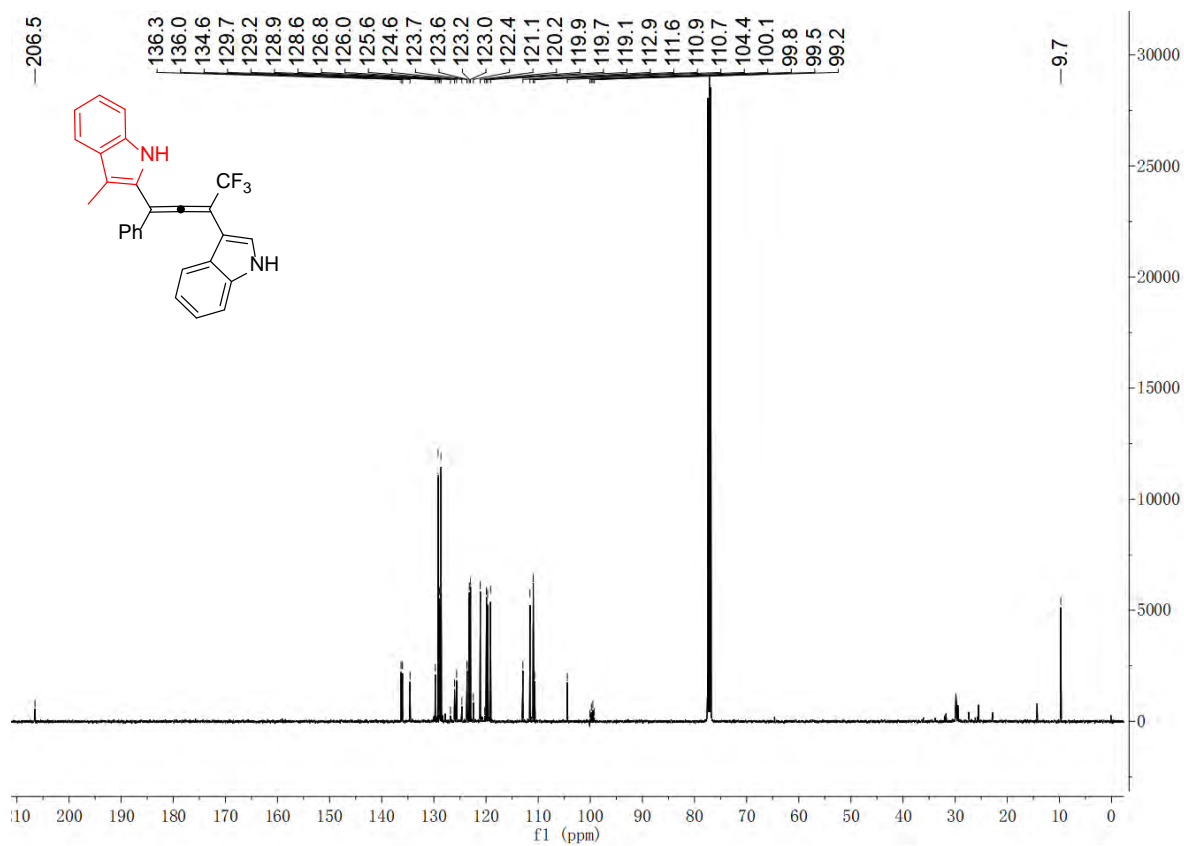

**<sup>19</sup>F NMR of compound 8a (in CDCl<sub>3</sub>)**

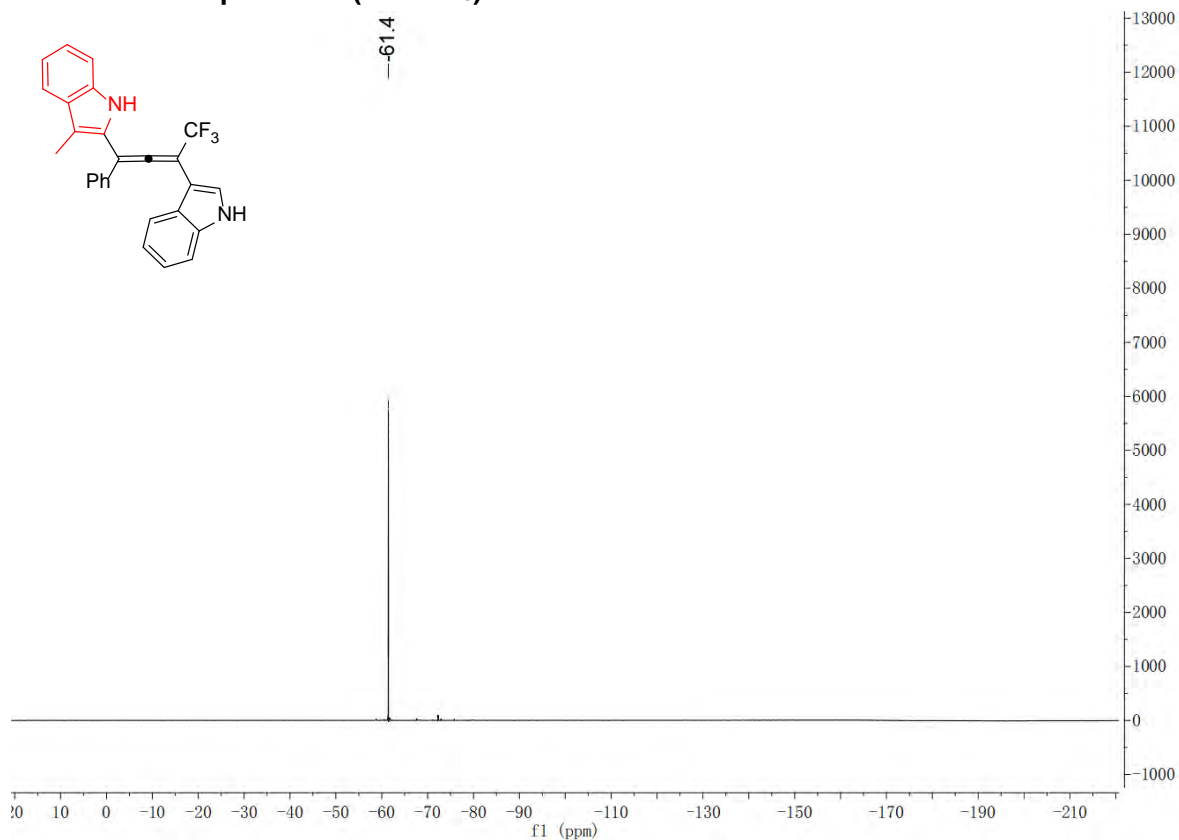

**<sup>1</sup>H NMR of compound 7a' (in CDCl<sub>3</sub>)**

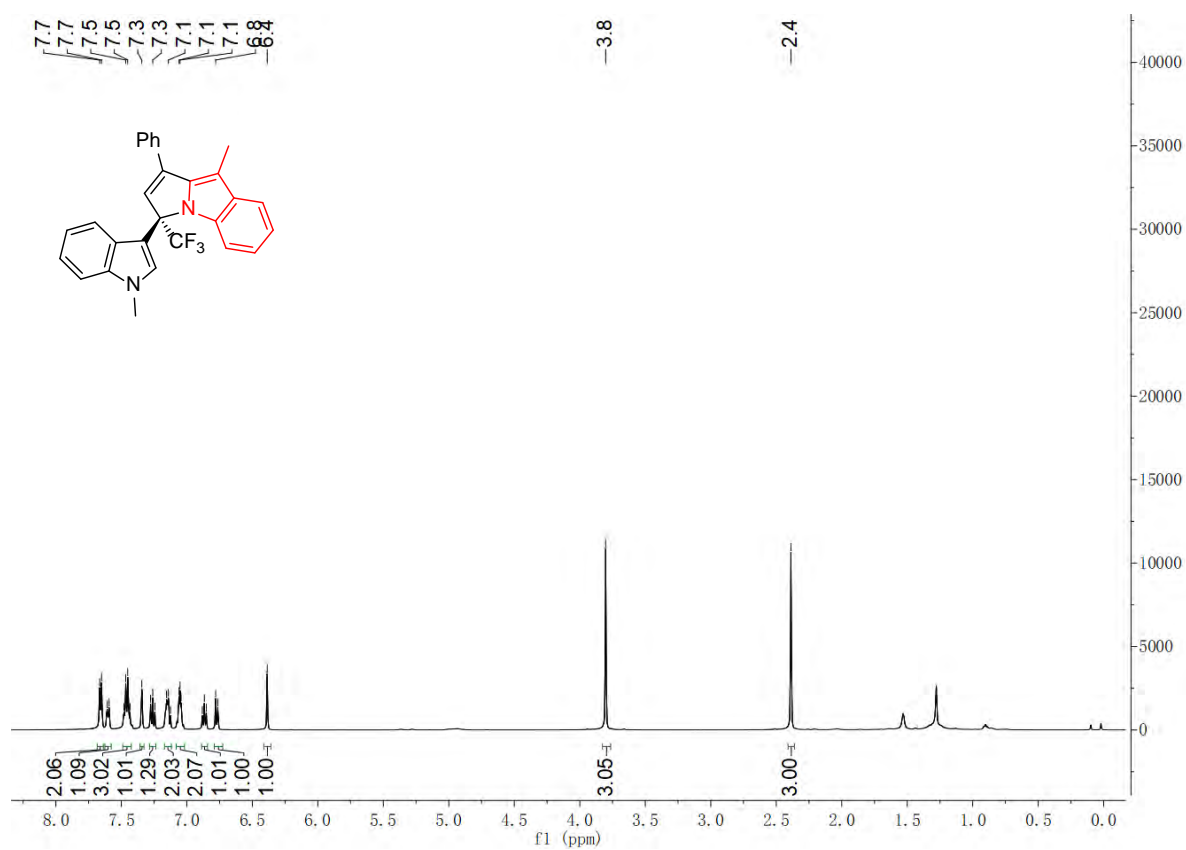



**<sup>13</sup>C NMR of compound 7a' (in CDCl<sub>3</sub>)**

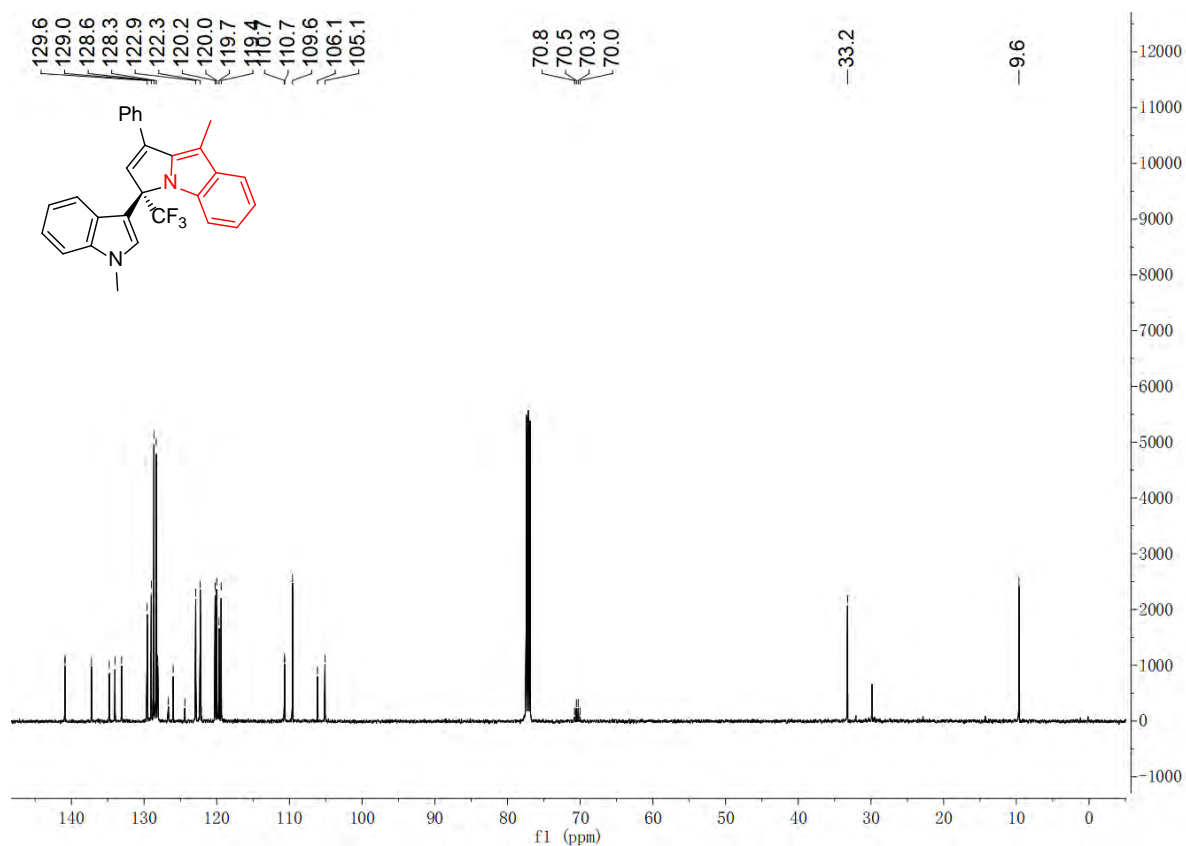

**<sup>19</sup>F NMR of compound 7a' (in CDCl<sub>3</sub>)**

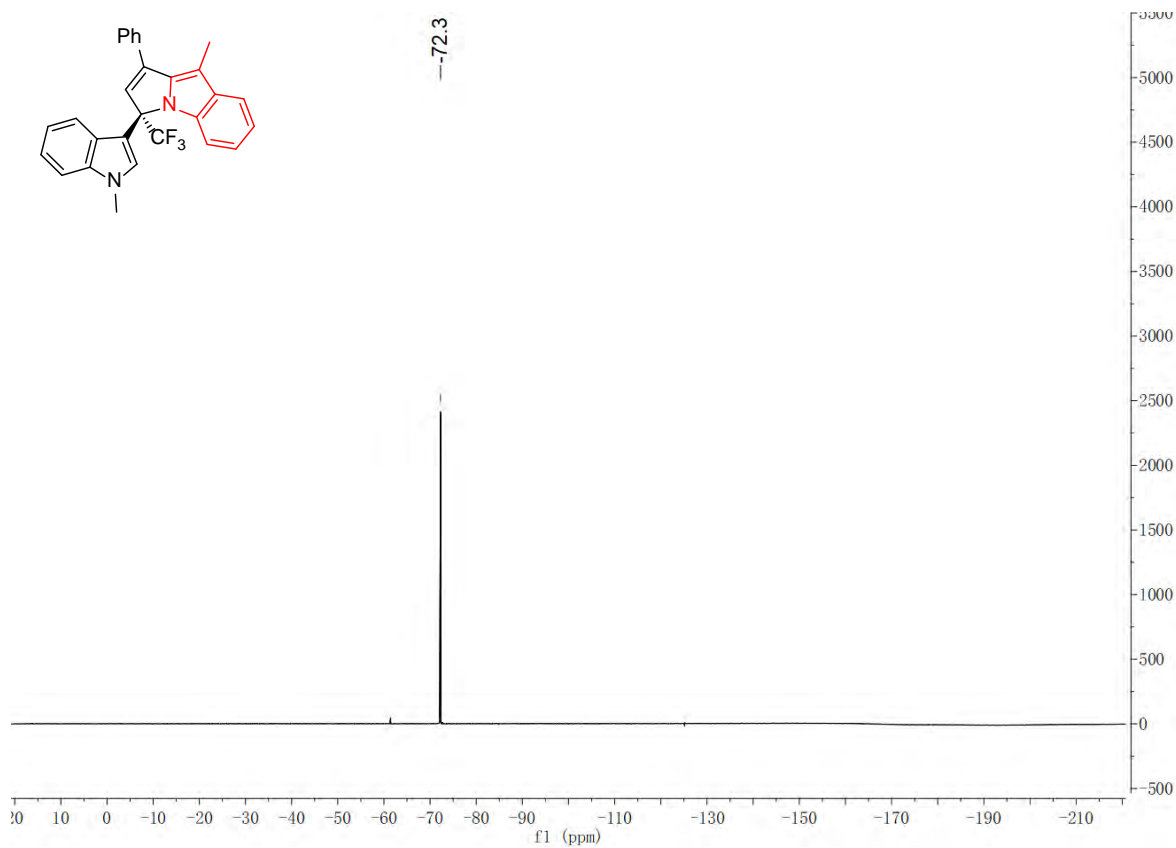

## 9. Copies of HPLC Spectra

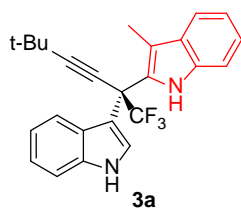

### HPLC spectrum of the racemate

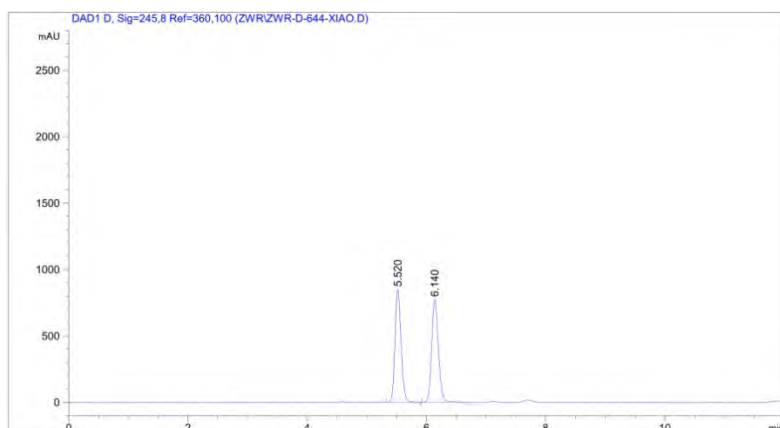

信号 1: DAD1 D, Sig=245,8 Ref=360,100

| 峰 # | 保留时间 [min] | 类型 | 峰宽 [min] | 峰面积 [mAU*s] | 峰高 [mAU]  | 峰面积 %   |
|-----|------------|----|----------|-------------|-----------|---------|
| 1   | 5.520      | VB | 0.1103   | 5980.47559  | 848.23560 | 49.7292 |
| 2   | 6.140      | BB | 0.1192   | 6045.60303  | 773.70276 | 50.2708 |

### HPLC spectrum of the enantioenriched compound

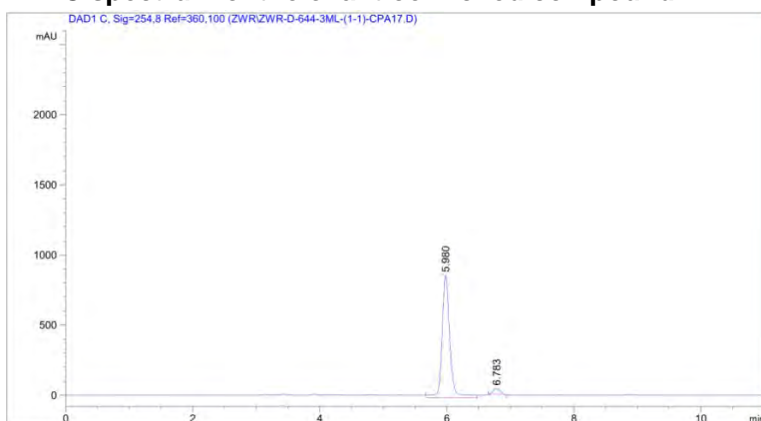

信号 1: DAD1 C, Sig=254,8 Ref=360,100

| 峰 # | 保留时间 [min] | 类型   | 峰宽 [min] | 峰面积 [mAU*s] | 峰高 [mAU]  | 峰面积 %   |
|-----|------------|------|----------|-------------|-----------|---------|
| 1   | 5.980      | MM R | 0.1439   | 7545.08447  | 873.61377 | 96.0075 |
| 2   | 6.783      | MM R | 0.1228   | 313.76642   | 42.57241  | 3.9925  |

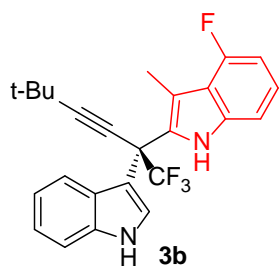

### HPLC spectrum of the racemate

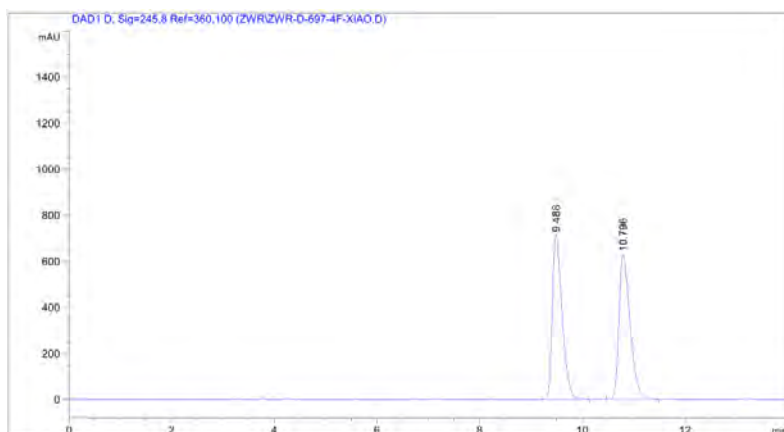

信号 1: DAD1 D, Sig=245,8 Ref=360,100

| 峰 # | 保留时间 [min] | 类型 | 峰宽 [min] | 峰面积 [mAU*s] | 峰高 [mAU]  | 峰面积 %   |
|-----|------------|----|----------|-------------|-----------|---------|
| 1   | 9.488      | BB | 0.1998   | 9415.66992  | 714.34064 | 49.9792 |
| 2   | 10.796     | BB | 0.2264   | 9423.51465  | 630.23212 | 50.0208 |

### HPLC spectrum of the enantioenriched compound

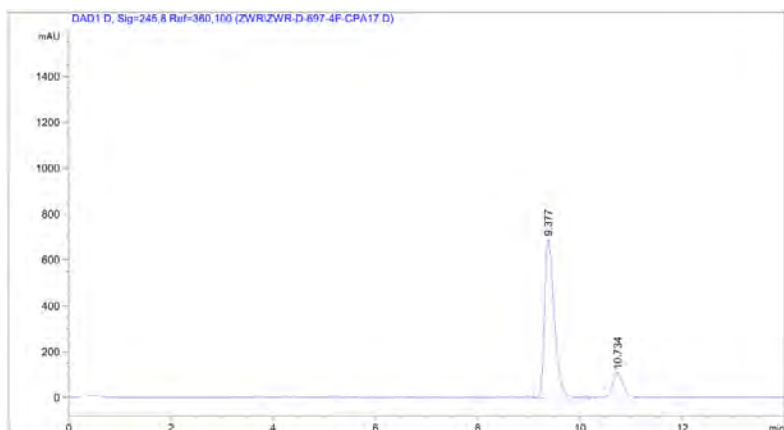

信号 1: DAD1 D, Sig=245,8 Ref=360,100

| 峰 # | 保留时间 [min] | 类型   | 峰宽 [min] | 峰面积 [mAU*s] | 峰高 [mAU]  | 峰面积 %   |
|-----|------------|------|----------|-------------|-----------|---------|
| 1   | 9.377      | MM R | 0.2231   | 9285.93457  | 693.75580 | 87.2159 |
| 2   | 10.734     | MM R | 0.2195   | 1361.13147  | 103.33169 | 12.7841 |

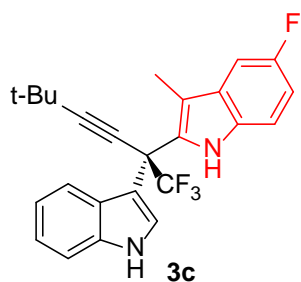

### HPLC spectrum of the racemate

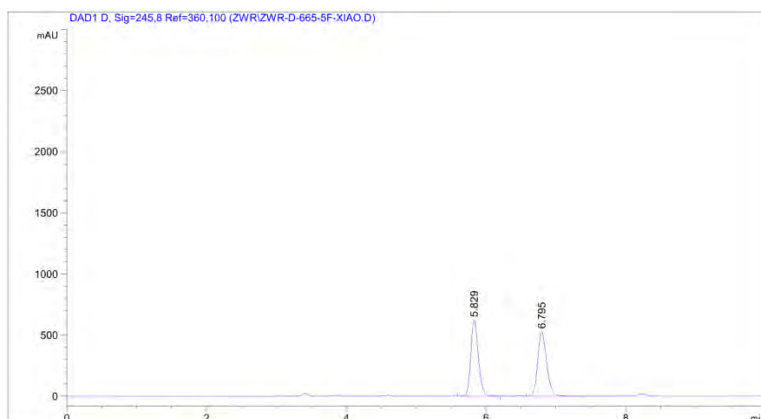

信号 1: DAD1 D, Sig=245,8 Ref=360,100

| 峰 # | 保留时间 [min] | 类型 | 峰宽 [min] | 峰面积 [mAU*s] | 峰高 [mAU]  | 峰面积 %   |
|-----|------------|----|----------|-------------|-----------|---------|
| 1   | 5.829      | BB | 0.1142   | 4717.57031  | 623.75342 | 49.9501 |
| 2   | 6.795      | VB | 0.1382   | 4727.00146  | 529.06079 | 50.0499 |

### HPLC spectrum of the enantioenriched compound

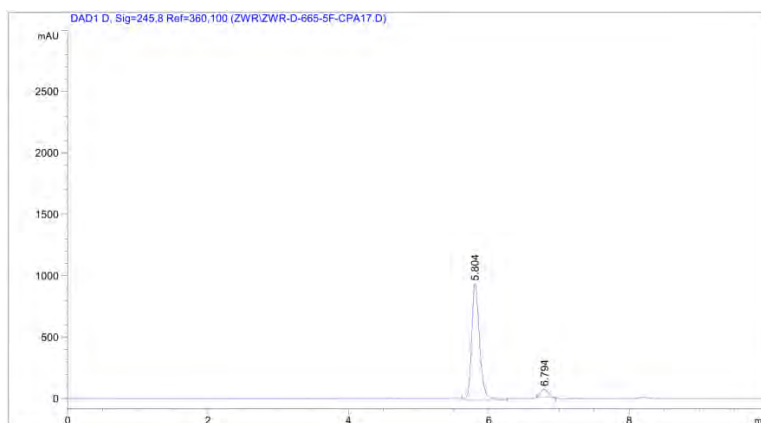

信号 1: DAD1 D, Sig=245,8 Ref=360,100

| 峰 # | 保留时间 [min] | 类型   | 峰宽 [min] | 峰面积 [mAU*s] | 峰高 [mAU]  | 峰面积 %   |
|-----|------------|------|----------|-------------|-----------|---------|
| 1   | 5.804      | MM R | 0.1335   | 7603.80518  | 949.09576 | 94.2351 |
| 2   | 6.794      | MM R | 0.1191   | 465.16776   | 65.08567  | 5.7649  |

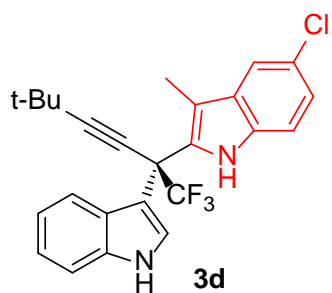

### HPLC spectrum of the racemate

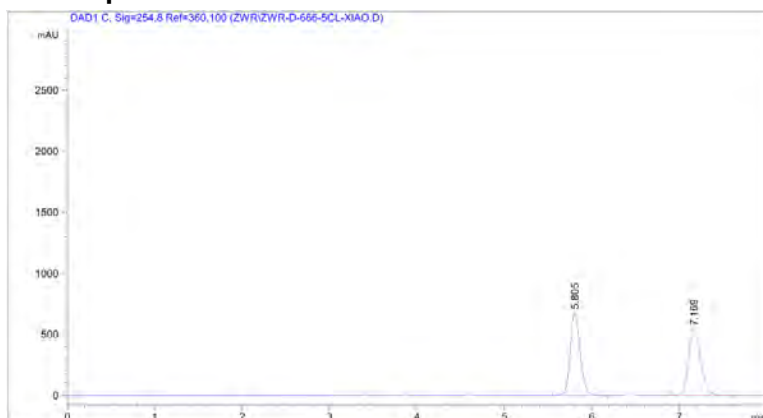

信号 1: DAD1 C, Sig=254,8 Ref=360,100

| 峰 # | 保留时间 [min] | 类型 | 峰宽 [min] | 峰面积 [mAU*s] | 峰高 [mAU]  | 峰面积 %   |
|-----|------------|----|----------|-------------|-----------|---------|
| 1   | 5.805      | BB | 0.1184   | 5270.27393  | 680.02924 | 50.0752 |
| 2   | 7.169      | BB | 0.1482   | 5254.44336  | 546.46912 | 49.9248 |

### HPLC spectrum of the enantioenriched compound

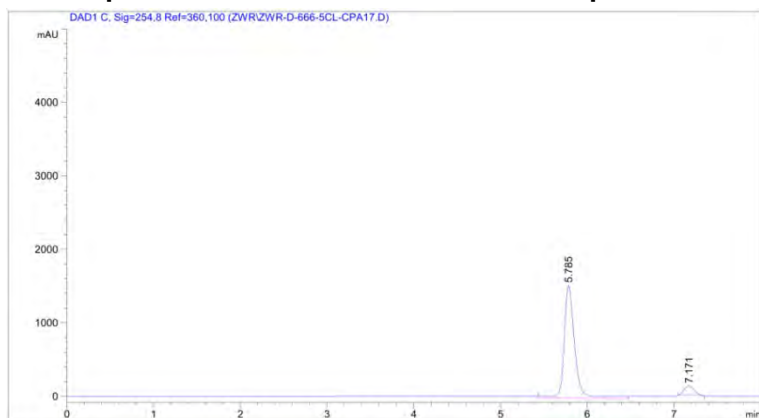

信号 1: DAD1 C, Sig=254,8 Ref=360,100

| 峰 # | 保留时间 [min] | 类型   | 峰宽 [min] | 峰面积 [mAU*s] | 峰高 [mAU]   | 峰面积 %   |
|-----|------------|------|----------|-------------|------------|---------|
| 1   | 5.785      | MM R | 0.1465   | 1.35009e4   | 1536.15674 | 93.1787 |
| 2   | 7.171      | MM R | 0.1330   | 988.35059   | 123.82976  | 6.8213  |

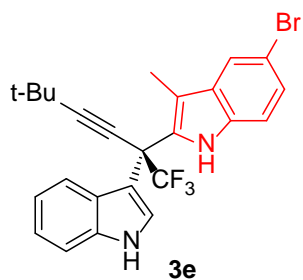

### HPLC spectrum of the racemate

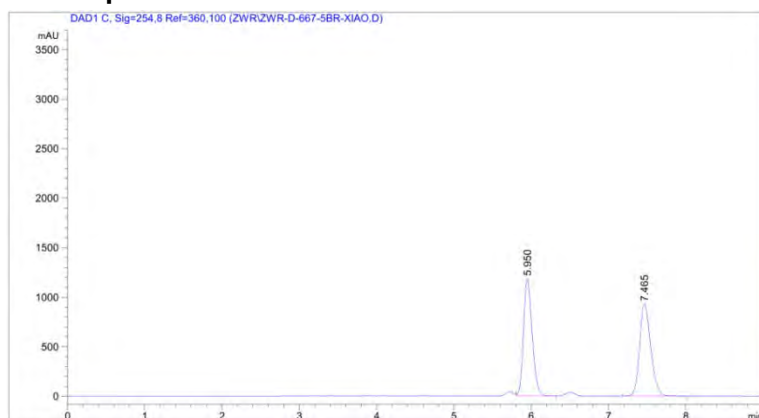

信号 1: DAD1 C, Sig=254,8 Ref=360,100

| 峰 # | 保留时间 [min] | 类型 | 峰宽 [min] | 峰面积 [mAU*s] | 峰高 [mAU]   | 峰面积 %   |
|-----|------------|----|----------|-------------|------------|---------|
| 1   | 5.950      | VV | 0.1194   | 9297.89355  | 1187.01428 | 49.9024 |
| 2   | 7.465      | BB | 0.1531   | 9334.25586  | 929.75336  | 50.0976 |

### HPLC spectrum of the enantioenriched compound

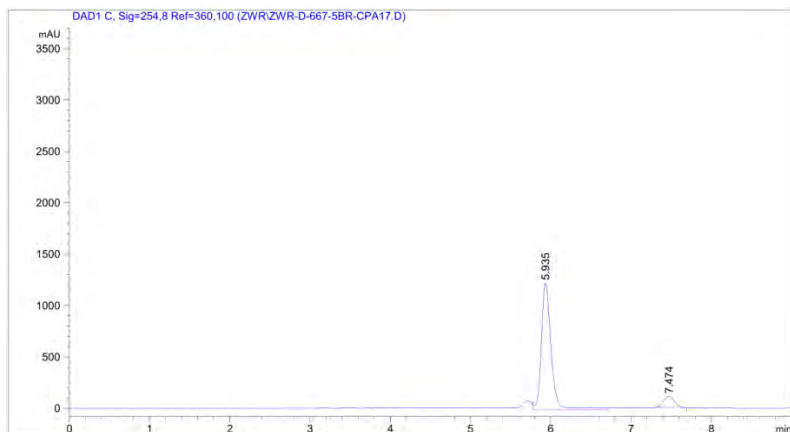

信号 1: DAD1 C, Sig=254,8 Ref=360,100

| 峰 # | 保留时间 [min] | 类型   | 峰宽 [min] | 峰面积 [mAU*s] | 峰高 [mAU]   | 峰面积 %   |
|-----|------------|------|----------|-------------|------------|---------|
| 1   | 5.935      | MM R | 0.1436   | 1.06390e4   | 1234.85767 | 91.8400 |
| 2   | 7.474      | MM R | 0.1481   | 945.27325   | 106.36582  | 8.1600  |

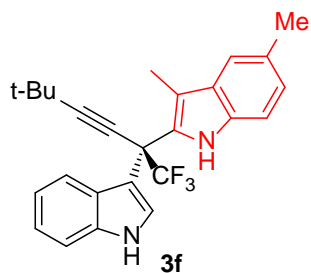

### HPLC spectrum of the racemate

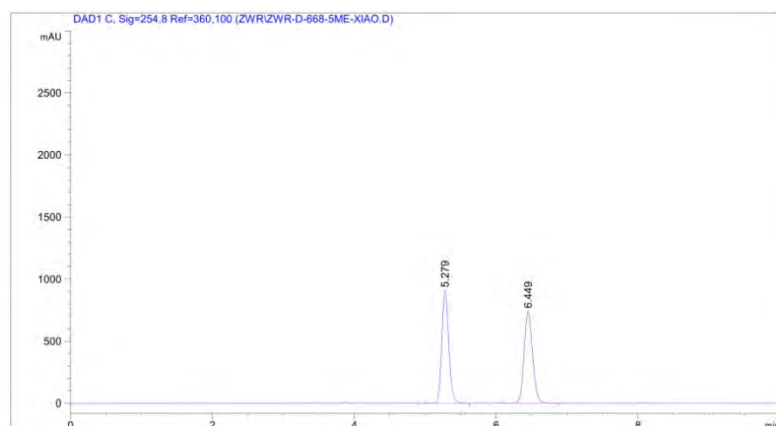

信号 1: DAD1 C, Sig=254,8 Ref=360,100

| 峰 # | 保留时间 [min] | 类型 | 峰宽 [min] | 峰面积 [mAU*s] | 峰高 [mAU]  | 峰面积 %   |
|-----|------------|----|----------|-------------|-----------|---------|
| 1   | 5.279      | BB | 0.1050   | 6159.32129  | 909.16516 | 49.8963 |
| 2   | 6.449      | BB | 0.1293   | 6184.93213  | 741.62708 | 50.1037 |

### HPLC spectrum of the enantioenriched compound

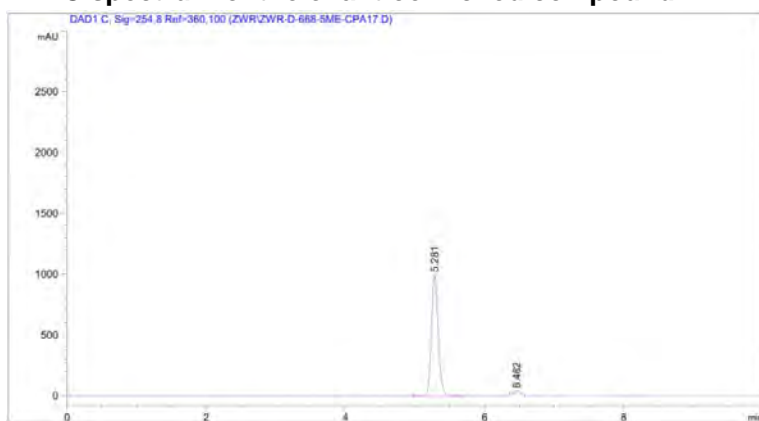

信号 1: DAD1 C, Sig=254,8 Ref=360,100

| 峰 # | 保留时间 [min] | 类型   | 峰宽 [min] | 峰面积 [mAU*s] | 峰高 [mAU]  | 峰面积 %   |
|-----|------------|------|----------|-------------|-----------|---------|
| 1   | 5.281      | MM R | 0.1169   | 7006.82520  | 998.71063 | 97.2739 |
| 2   | 6.462      | MM R | 0.1085   | 196.36325   | 30.16833  | 2.7261  |

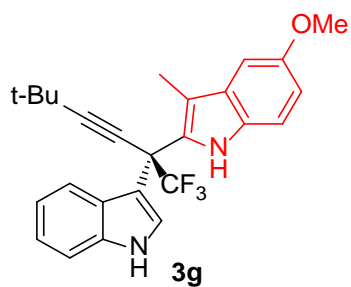

### HPLC spectrum of the racemate

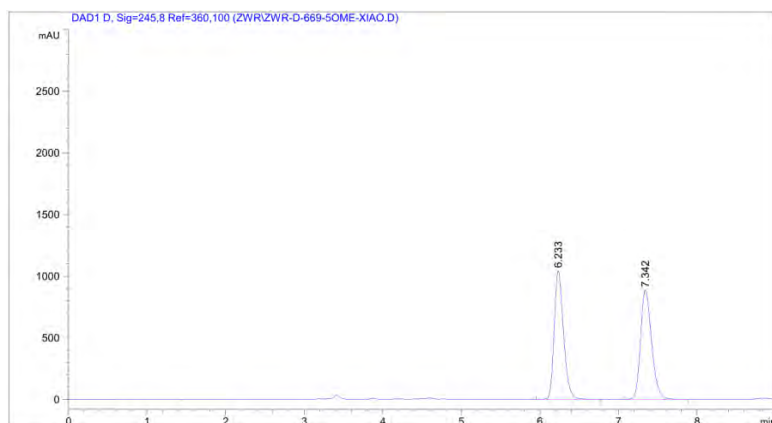

信号 1: DAD1 D, Sig=245,8 Ref=360,100

| 峰 # | 保留时间 [min] | 类型 | 峰宽 [min] | 峰面积 [mAU*s] | 峰高 [mAU]   | 峰面积 %   |
|-----|------------|----|----------|-------------|------------|---------|
| 1   | 6.233      | BB | 0.1283   | 8596.21191  | 1041.68176 | 49.8374 |
| 2   | 7.342      | VB | 0.1518   | 8652.28809  | 886.72565  | 50.1626 |

### HPLC spectrum of the enantioenriched compound

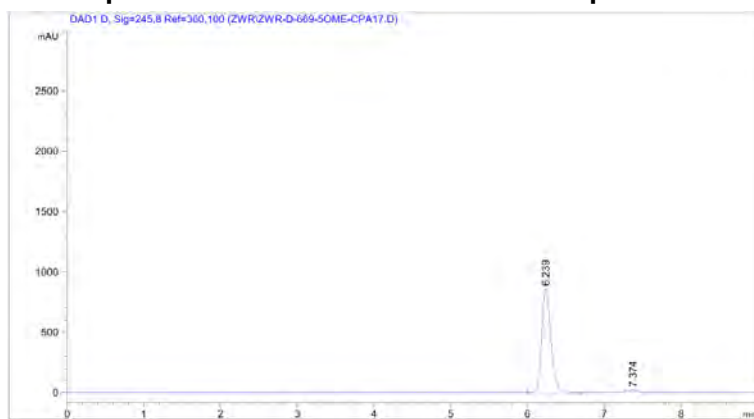

信号 1: DAD1 D, Sig=245,8 Ref=360,100

| 峰 # | 保留时间 [min] | 类型   | 峰宽 [min] | 峰面积 [mAU*s] | 峰高 [mAU]  | 峰面积 %   |
|-----|------------|------|----------|-------------|-----------|---------|
| 1   | 6.239      | MM R | 0.1461   | 7651.24512  | 873.00812 | 98.3912 |
| 2   | 7.374      | MM R | 0.1265   | 125.10931   | 16.48490  | 1.6088  |



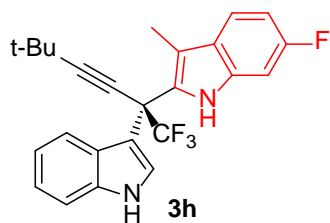

### HPLC spectrum of the racemate

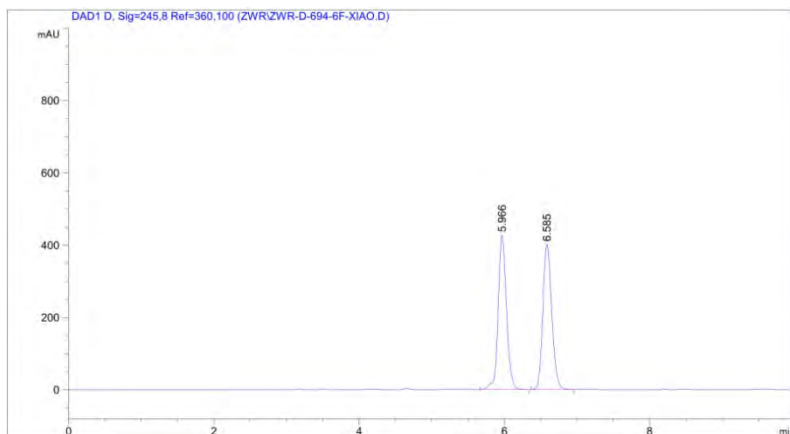

信号 1: DAD1 D, Sig=245,8 Ref=360,100

| 峰 # | 保留时间 [min] | 类型 | 峰宽 [min] | 峰面积 [mAU*s] | 峰高 [mAU]  | 峰面积 %   |
|-----|------------|----|----------|-------------|-----------|---------|
| 1   | 5.966      | BB | 0.1211   | 3412.56909  | 427.49149 | 50.0215 |
| 2   | 6.585      | BB | 0.1310   | 3409.63037  | 401.87247 | 49.9785 |

### HPLC spectrum of the enantioenriched compound

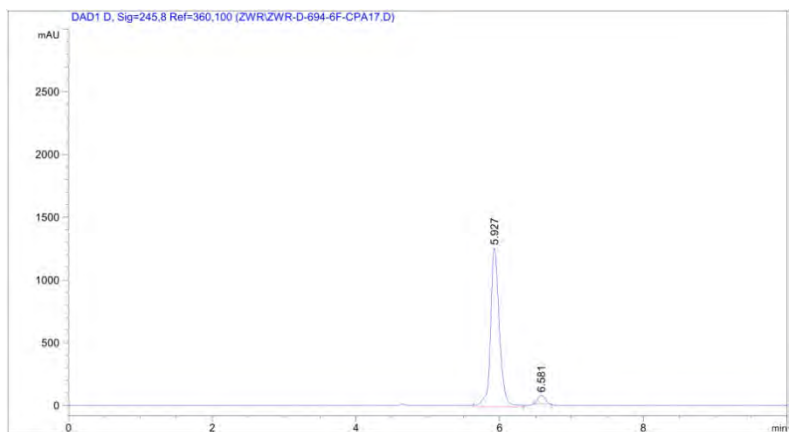

信号 1: DAD1 D, Sig=245,8 Ref=360,100

| 峰 # | 保留时间 [min] | 类型   | 峰宽 [min] | 峰面积 [mAU*s] | 峰高 [mAU]   | 峰面积 %   |
|-----|------------|------|----------|-------------|------------|---------|
| 1   | 5.927      | MM R | 0.1437   | 1.09446e4   | 1269.10889 | 95.7494 |
| 2   | 6.581      | MM R | 0.1185   | 485.85861   | 68.33458   | 4.2506  |

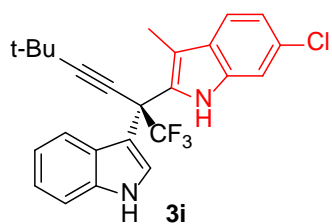

### HPLC spectrum of the racemate

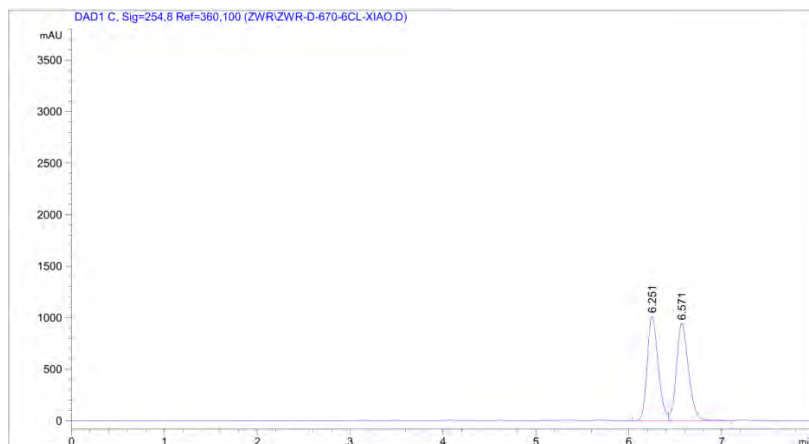

信号 1: DAD1 C, Sig=254,8 Ref=360,100

| 峰 # | 保留时间 [min] | 类型 | 峰宽 [min] | 峰面积 [mAU*s] | 峰高 [mAU]   | 峰面积 %   |
|-----|------------|----|----------|-------------|------------|---------|
| 1   | 6.251      | BV | 0.1275   | 8304.21094  | 1014.31250 | 49.4182 |
| 2   | 6.571      | VV | 0.1371   | 8499.73633  | 943.91785  | 50.5818 |

### HPLC spectrum of the enantioenriched compound

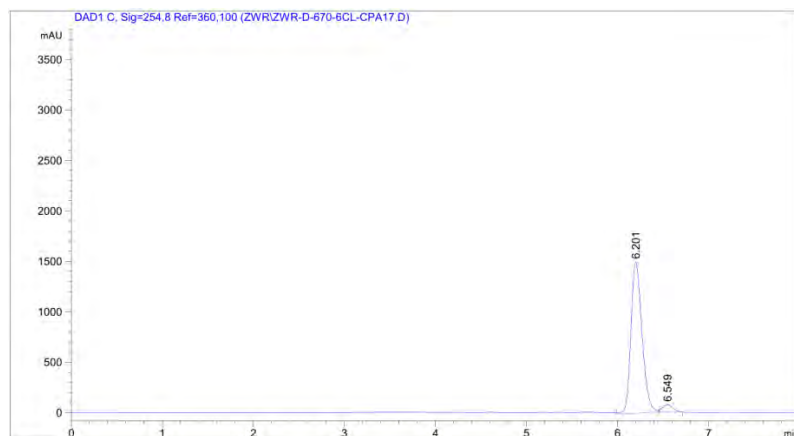

信号 1: DAD1 C, Sig=254,8 Ref=360,100

| 峰 # | 保留时间 [min] | 类型   | 峰宽 [min] | 峰面积 [mAU*s] | 峰高 [mAU]   | 峰面积 %   |
|-----|------------|------|----------|-------------|------------|---------|
| 1   | 6.201      | MM R | 0.1405   | 1.26384e4   | 1498.84766 | 96.0928 |
| 2   | 6.549      | MM R | 0.1238   | 513.89026   | 69.20360   | 3.9072  |

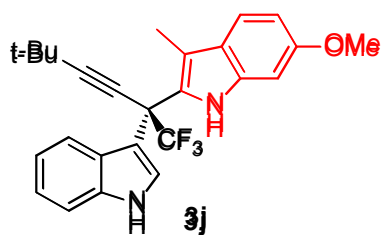

### HPLC spectrum of the racemate

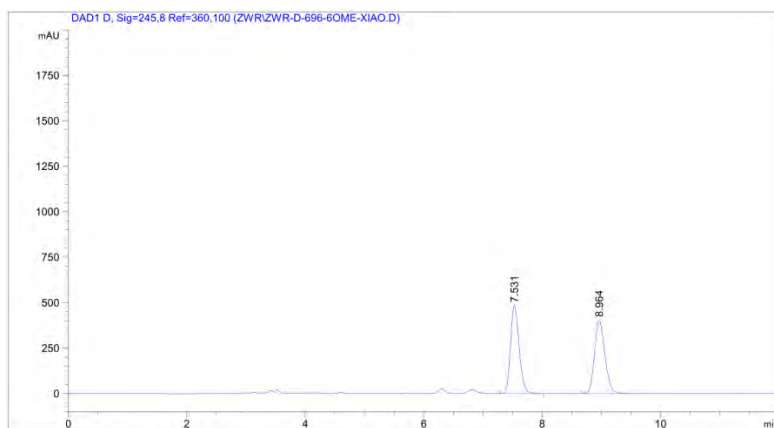

信号 1: DAD1 D, Sig=245,8 Ref=360,100

| 峰 # | 保留时间 [min] | 类型 | 峰宽 [min] | 峰面积 [mAU*s] | 峰高 [mAU]  | 峰面积 %   |
|-----|------------|----|----------|-------------|-----------|---------|
| 1   | 7.531      | BB | 0.1559   | 4898.97461  | 484.83606 | 49.8550 |
| 2   | 8.964      | BB | 0.1879   | 4927.46973  | 405.13675 | 50.1450 |

### HPLC spectrum of the enantioenriched compound

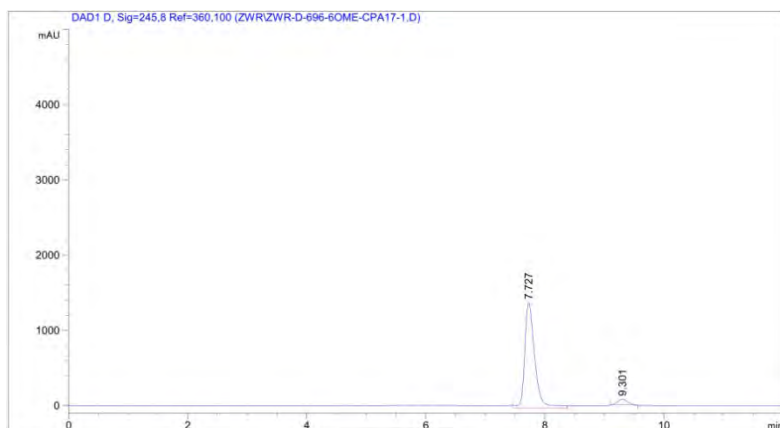

信号 1: DAD1 D, Sig=245,8 Ref=360,100

| 峰 # | 保留时间 [min] | 类型   | 峰宽 [min] | 峰面积 [mAU*s] | 峰高 [mAU]   | 峰面积 %   |
|-----|------------|------|----------|-------------|------------|---------|
| 1   | 7.727      | MM R | 0.1940   | 1.63171e4   | 1402.03821 | 95.1360 |
| 2   | 9.301      | MM R | 0.1838   | 834.23462   | 75.62906   | 4.8640  |

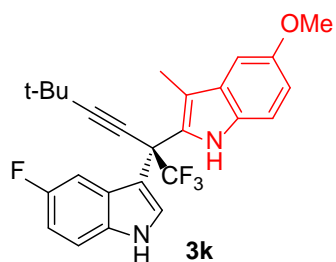

### HPLC spectrum of the racemate

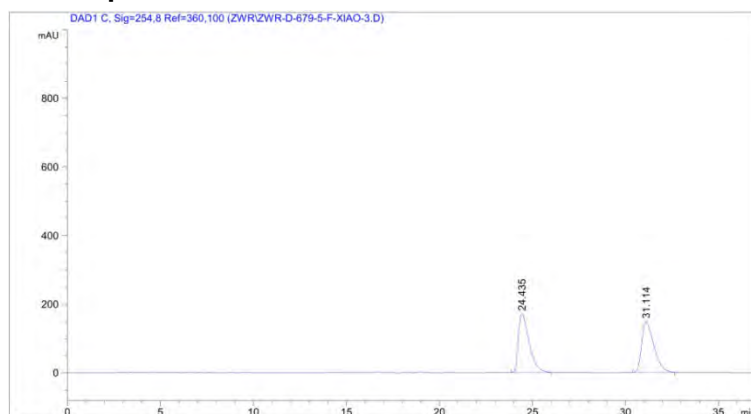

信号 1: DAD1 C, Sig=254,8 Ref=360,100

| 峰 # | 保留时间 [min] | 类型 | 峰宽 [min] | 峰面积 [mAU*s] | 峰高 [mAU]  | 峰面积 %   |
|-----|------------|----|----------|-------------|-----------|---------|
| 1   | 24.435     | BB | 0.6026   | 6857.98389  | 171.47102 | 50.2288 |
| 2   | 31.114     | BB | 0.6954   | 6795.50391  | 149.19061 | 49.7712 |

### HPLC spectrum of the enantioenriched compound

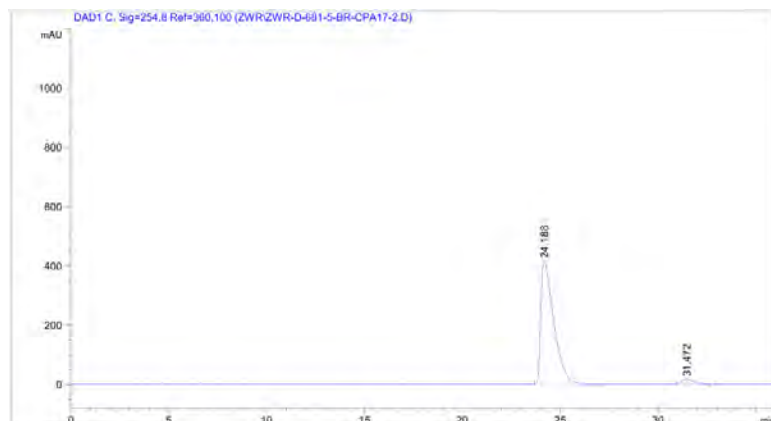

信号 1: DAD1 C, Sig=254,8 Ref=360,100

| 峰 # | 保留时间 [min] | 类型   | 峰宽 [min] | 峰面积 [mAU*s] | 峰高 [mAU]  | 峰面积 %   |
|-----|------------|------|----------|-------------|-----------|---------|
| 1   | 24.188     | MM R | 0.7923   | 2.00132e4   | 421.00980 | 97.1371 |
| 2   | 31.472     | MM R | 0.6630   | 589.84753   | 14.82670  | 2.8629  |

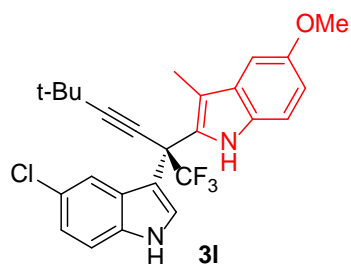

### HPLC spectrum of the racemate

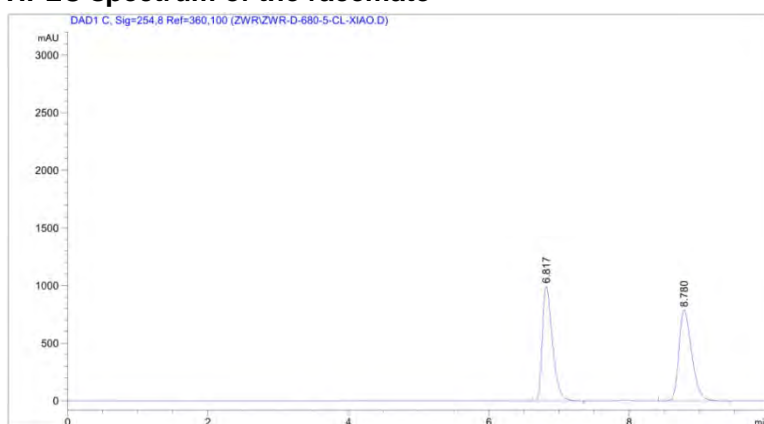

信号 1: DAD1 C, Sig=254,8 Ref=360,100

| 峰 # | 保留时间 [min] | 类型 | 峰宽 [min] | 峰面积 [mAU*s] | 峰高 [mAU]  | 峰面积 %   |
|-----|------------|----|----------|-------------|-----------|---------|
| 1   | 6.817      | BB | 0.1527   | 9937.87207  | 993.92303 | 49.9186 |
| 2   | 8.780      | VB | 0.1937   | 9970.29687  | 787.55768 | 50.0814 |

### HPLC spectrum of the enantioenriched compound

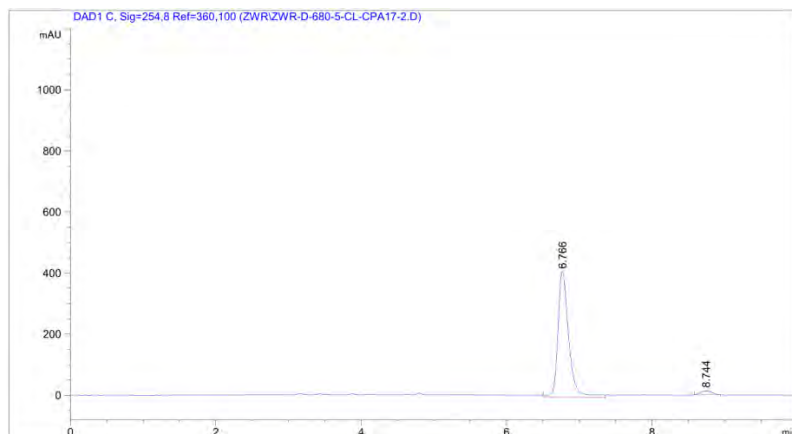

信号 1: DAD1 C, Sig=254,8 Ref=360,100

| 峰 # | 保留时间 [min] | 类型   | 峰宽 [min] | 峰面积 [mAU*s] | 峰高 [mAU]  | 峰面积 %   |
|-----|------------|------|----------|-------------|-----------|---------|
| 1   | 6.766      | MM R | 0.1728   | 4261.18457  | 410.93579 | 97.0630 |
| 2   | 8.744      | MM R | 0.1708   | 128.93944   | 12.57970  | 2.9370  |

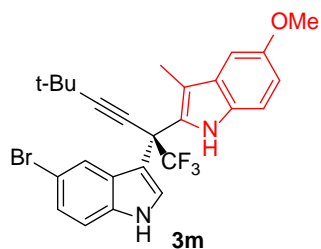

### HPLC spectrum of the racemate

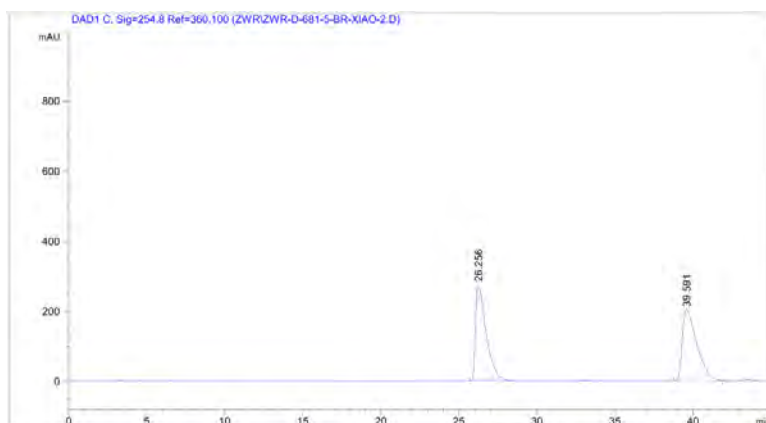

信号 1: DAD1 C, Sig=254,8 Ref=360,100

| 峰 # | 保留时间 [min] | 类型 | 峰宽 [min] | 峰面积 [mAU*s] | 峰高 [mAU]  | 峰面积 %   |
|-----|------------|----|----------|-------------|-----------|---------|
| 1   | 26.256     | BB | 0.7278   | 1.31233e4   | 274.48920 | 49.9334 |
| 2   | 39.591     | BB | 0.9356   | 1.31582e4   | 203.71080 | 50.0666 |

### HPLC spectrum of the enantioenriched compound

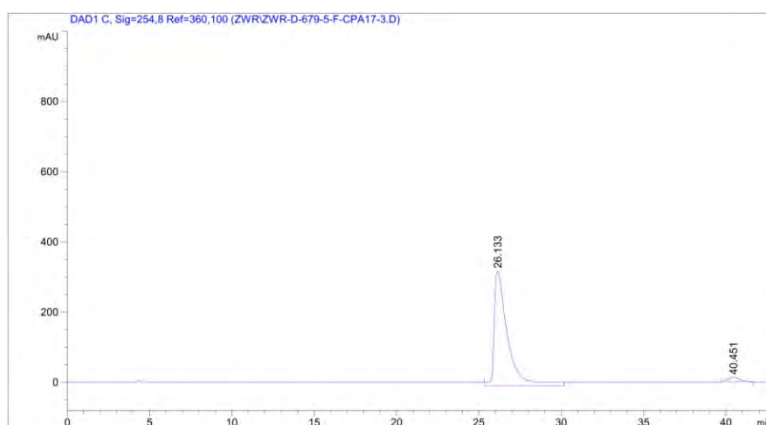

信号 1: DAD1 C, Sig=254,8 Ref=360,100

| 峰 # | 保留时间 [min] | 类型   | 峰宽 [min] | 峰面积 [mAU*s] | 峰高 [mAU]  | 峰面积 %   |
|-----|------------|------|----------|-------------|-----------|---------|
| 1   | 26.133     | MM R | 0.9457   | 1.84956e4   | 325.96304 | 97.0831 |
| 2   | 40.451     | MM R | 0.7727   | 555.70648   | 11.98569  | 2.9169  |

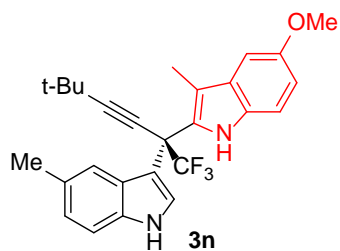

### HPLC spectrum of the racemate

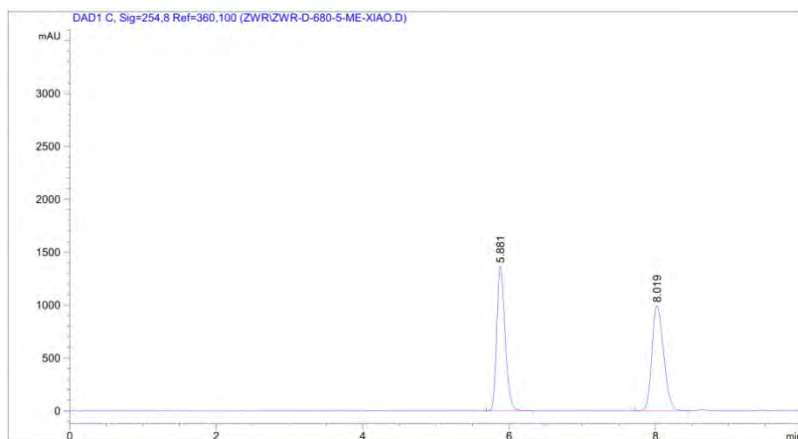

信号 1: DAD1 C, Sig=254,8 Ref=360,100

| 峰 # | 保留时间 [min] | 类型 | 峰宽 [min] | 峰面积 [mAU*s] | 峰高 [mAU]   | 峰面积 %   |
|-----|------------|----|----------|-------------|------------|---------|
| 1   | 5.881      | BB | 0.1206   | 1.08583e4   | 1367.90833 | 49.6889 |
| 2   | 8.019      | BV | 0.1730   | 1.09943e4   | 994.48737  | 50.3111 |

### HPLC spectrum of the enantioenriched compound

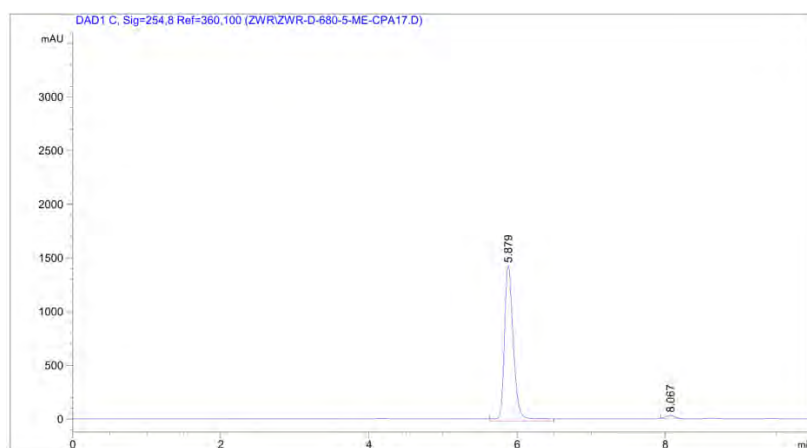

信号 1: DAD1 C, Sig=254,8 Ref=360,100

| 峰 # | 保留时间 [min] | 类型   | 峰宽 [min] | 峰面积 [mAU*s] | 峰高 [mAU]   | 峰面积 %   |
|-----|------------|------|----------|-------------|------------|---------|
| 1   | 5.879      | MM R | 0.1439   | 1.24816e4   | 1445.48413 | 98.3195 |
| 2   | 8.067      | MM R | 0.1412   | 213.33418   | 25.18801   | 1.6805  |

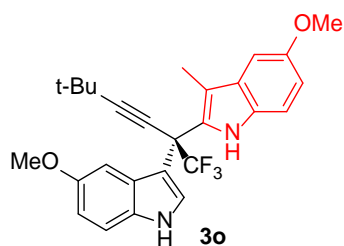

### HPLC spectrum of the racemate

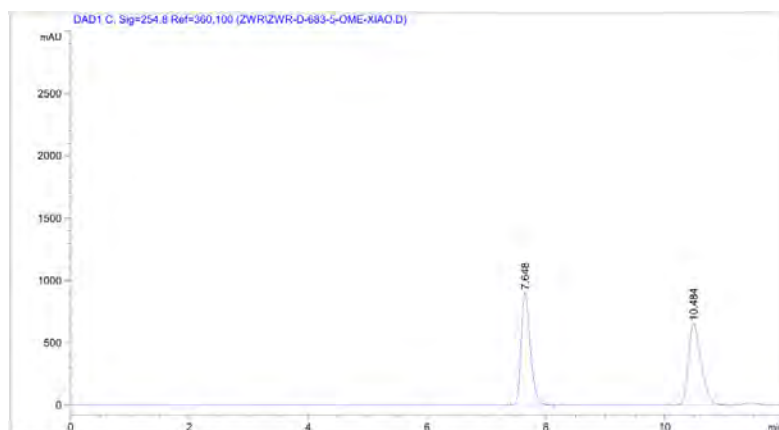

信号 1: DAD1 C, Sig=254,8 Ref=360,100

| 峰 # | 保留时间 [min] | 类型 | 峰宽 [min] | 峰面积 [mAU*s] | 峰高 [mAU]  | 峰面积 %   |
|-----|------------|----|----------|-------------|-----------|---------|
| 1   | 7.648      | BB | 0.1652   | 9686.93652  | 902.31567 | 49.8624 |
| 2   | 10.484     | BB | 0.2303   | 9740.39746  | 652.12354 | 50.1376 |

### HPLC spectrum of the enantioenriched compound

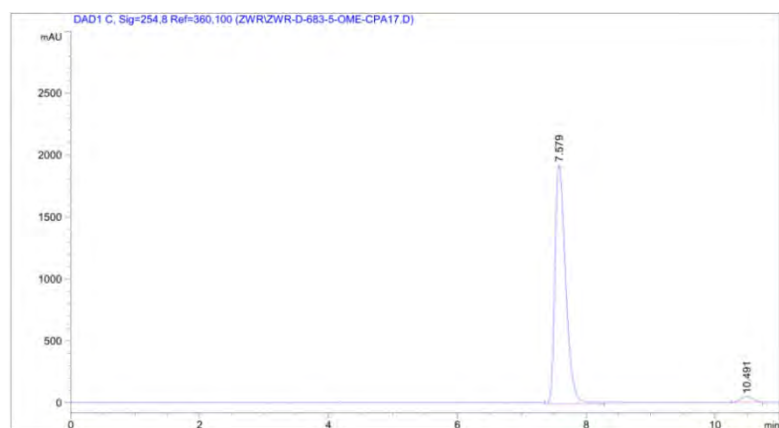

信号 1: DAD1 C, Sig=254,8 Ref=360,100

| 峰 # | 保留时间 [min] | 类型   | 峰宽 [min] | 峰面积 [mAU*s] | 峰高 [mAU]   | 峰面积 %   |
|-----|------------|------|----------|-------------|------------|---------|
| 1   | 7.579      | MM R | 0.1959   | 2.27577e4   | 1936.12036 | 97.4372 |
| 2   | 10.491     | MM R | 0.2148   | 598.57629   | 46.44263   | 2.5628  |



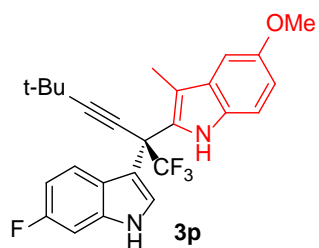

### HPLC spectrum of the racemate

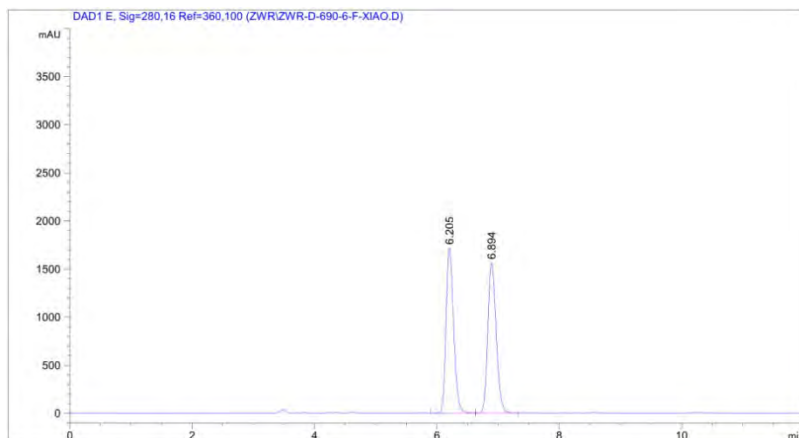

信号 1: DAD1 E, Sig=280,16 Ref=360,100

| 峰 # | 保留时间 [min] | 类型 | 峰宽 [min] | 峰面积 [mAU*s] | 峰高 [mAU]   | 峰面积 %   |
|-----|------------|----|----------|-------------|------------|---------|
| 1   | 6.205      | VV | 0.1346   | 1.48270e4   | 1720.20068 | 50.0225 |
| 2   | 6.894      | VB | 0.1465   | 1.48137e4   | 1564.27441 | 49.9775 |

### HPLC spectrum of the enantioenriched compound

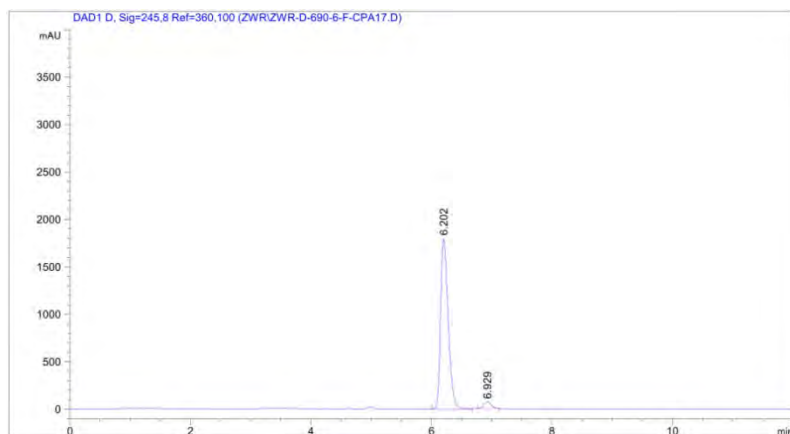

信号 1: DAD1 D, Sig=245,8 Ref=360,100

| 峰 # | 保留时间 [min] | 类型   | 峰宽 [min] | 峰面积 [mAU*s] | 峰高 [mAU]   | 峰面积 %   |
|-----|------------|------|----------|-------------|------------|---------|
| 1   | 6.202      | MM R | 0.1469   | 1.58597e4   | 1798.86609 | 96.6542 |
| 2   | 6.929      | MM R | 0.1362   | 548.99768   | 67.20406   | 3.3458  |

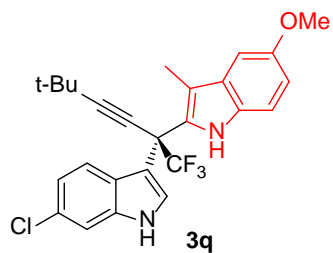

### HPLC spectrum of the racemate

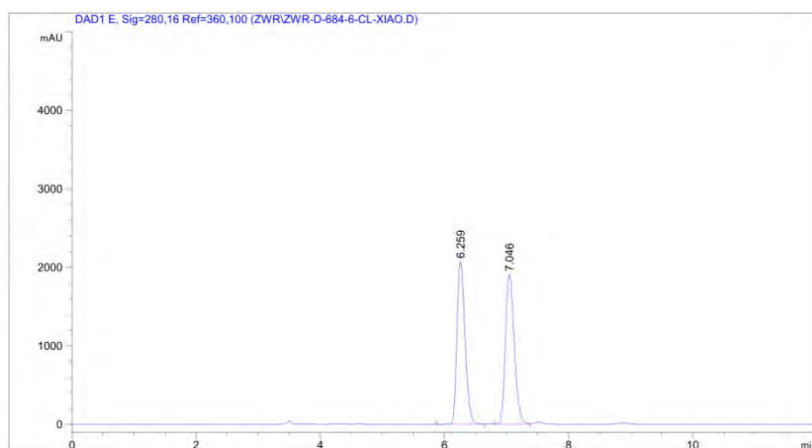

信号 1: DAD1 E, Sig=280,16 Ref=360,100

| 峰 # | 保留时间 [min] | 类型 | 峰宽 [min] | 峰面积 [mAU*s] | 峰高 [mAU]   | 峰面积 %   |
|-----|------------|----|----------|-------------|------------|---------|
| 1   | 6.259      | BV | 0.1415   | 1.87672e4   | 2075.53760 | 49.7515 |
| 2   | 7.046      | VV | 0.1537   | 1.89547e4   | 1910.66882 | 50.2485 |

### HPLC spectrum of the enantioenriched compound

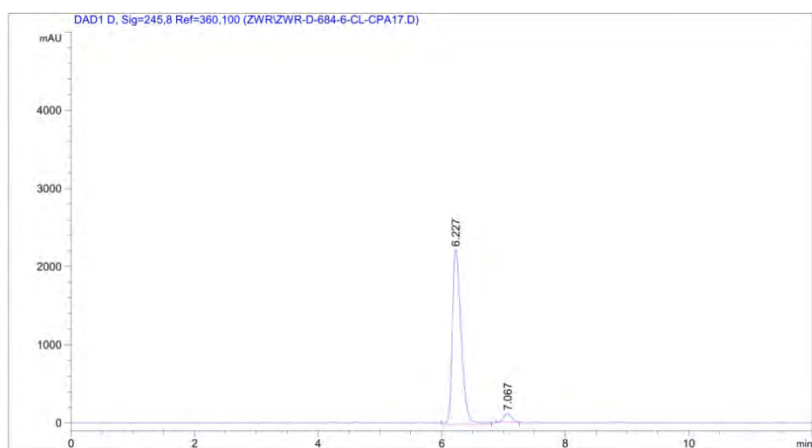

信号 1: DAD1 D, Sig=245,8 Ref=360,100

| 峰 # | 保留时间 [min] | 类型   | 峰宽 [min] | 峰面积 [mAU*s] | 峰高 [mAU]   | 峰面积 %   |
|-----|------------|------|----------|-------------|------------|---------|
| 1   | 6.227      | MM R | 0.1673   | 2.24232e4   | 2233.47949 | 95.8871 |
| 2   | 7.067      | MM R | 0.1474   | 961.80597   | 108.77927  | 4.1129  |

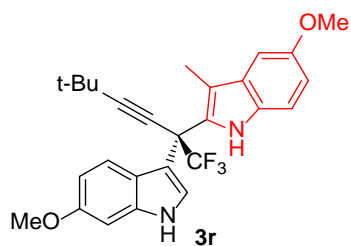

### HPLC spectrum of the racemate

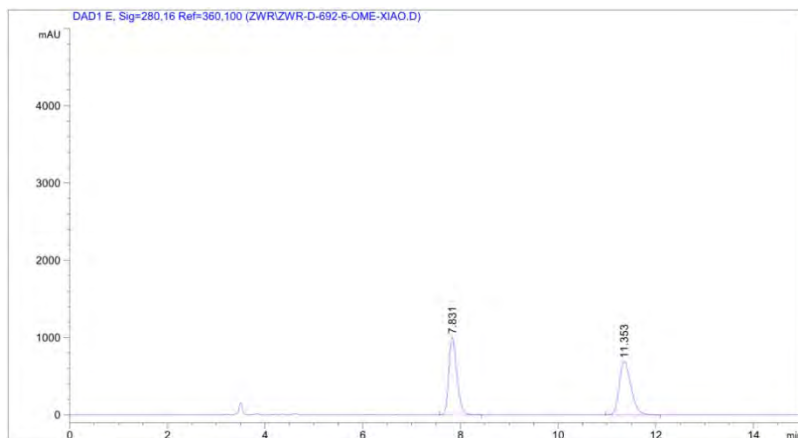

信号 1: DAD1 E, Sig=280,16 Ref=360,100

| 峰 # | 保留时间 [min] | 类型 | 峰宽 [min] | 峰面积 [mAU*s] | 峰高 [mAU]   | 峰面积 %   |
|-----|------------|----|----------|-------------|------------|---------|
| 1   | 7.831      | BB | 0.1755   | 1.15267e4   | 1007.52960 | 50.0093 |
| 2   | 11.353     | BB | 0.2559   | 1.15224e4   | 693.40417  | 49.9907 |

### HPLC spectrum of the enantioenriched compound

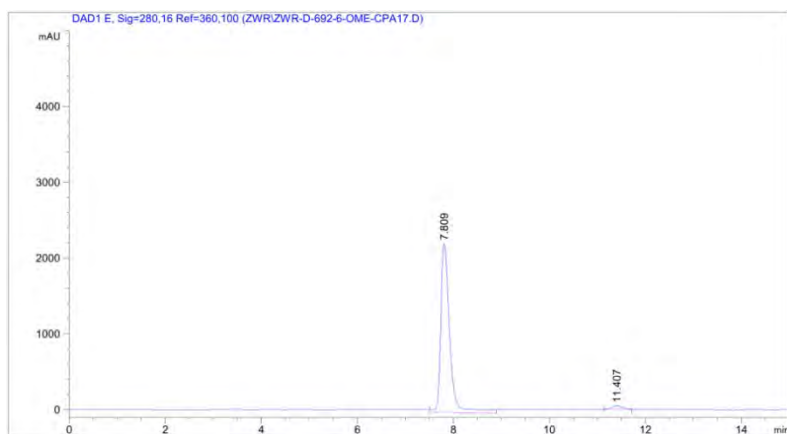

信号 1: DAD1 E, Sig=280,16 Ref=360,100

| 峰 # | 保留时间 [min] | 类型   | 峰宽 [min] | 峰面积 [mAU*s] | 峰高 [mAU]   | 峰面积 %   |
|-----|------------|------|----------|-------------|------------|---------|
| 1   | 7.809      | MM R | 0.2166   | 2.89941e4   | 2231.05615 | 98.0457 |
| 2   | 11.407     | MM R | 0.2125   | 577.91431   | 45.33232   | 1.9543  |

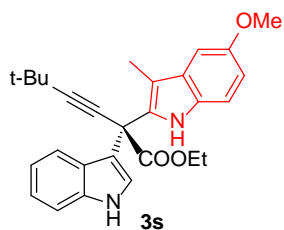

### HPLC spectrum of the racemate

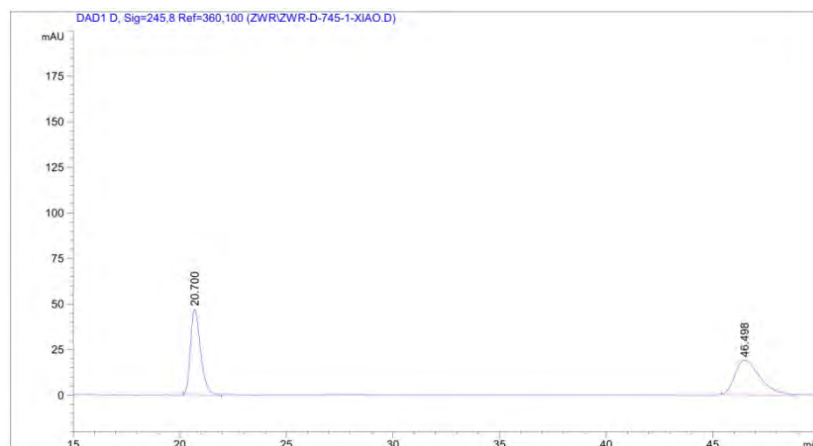

信号 1: DAD1 D, Sig=245,8 Ref=360,100

| 峰 # | 保留时间 [min] | 类型   | 峰宽 [min] | 峰面积 [mAU*s] | 峰高 [mAU] | 峰面积 %   |
|-----|------------|------|----------|-------------|----------|---------|
| 1   | 20.700     | MM R | 0.5560   | 1569.50525  | 47.04650 | 49.8492 |
| 2   | 46.498     | MM R | 1.3754   | 1579.00317  | 19.13347 | 50.1508 |

### HPLC spectrum of the enantioenriched compound

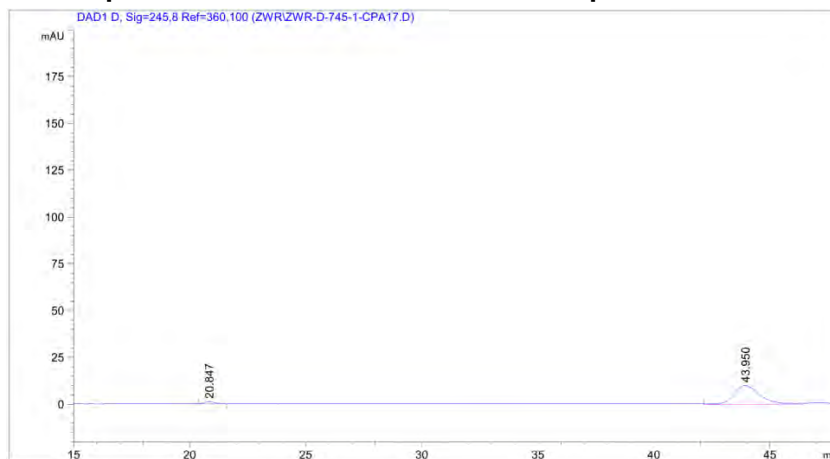

信号 1: DAD1 D, Sig=245,8 Ref=360,100

| 峰 # | 保留时间 [min] | 类型   | 峰宽 [min] | 峰面积 [mAU*s] | 峰高 [mAU] | 峰面积 %   |
|-----|------------|------|----------|-------------|----------|---------|
| 1   | 20.847     | MM R | 0.5490   | 37.69473    | 1.14437  | 4.6849  |
| 2   | 43.950     | MM R | 1.2794   | 766.89899   | 9.99063  | 95.3151 |

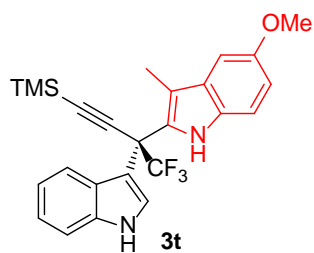

### HPLC spectrum of the racemate

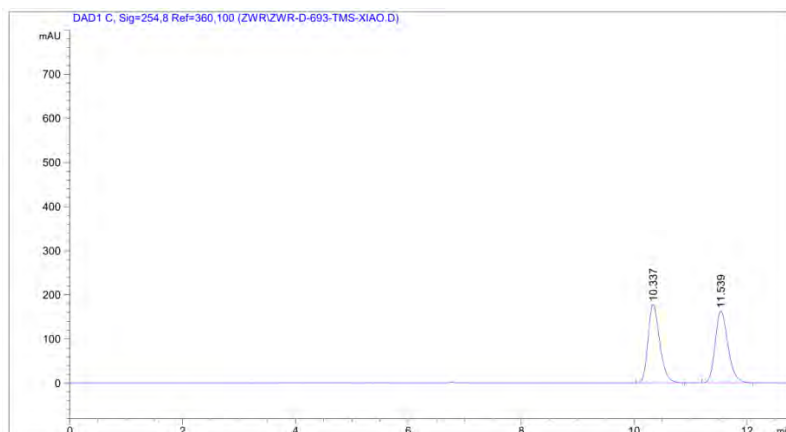

信号 1: DAD1 C, Sig=254,8 Ref=360,100

| 峰 # | 保留时间 [min] | 类型 | 峰宽 [min] | 峰面积 [mAU*s] | 峰高 [mAU]  | 峰面积 %   |
|-----|------------|----|----------|-------------|-----------|---------|
| 1   | 10.337     | BB | 0.2216   | 2555.82349  | 177.85921 | 50.0523 |
| 2   | 11.539     | BB | 0.2407   | 2550.48193  | 162.83086 | 49.9477 |

### HPLC spectrum of the enantioenriched compound

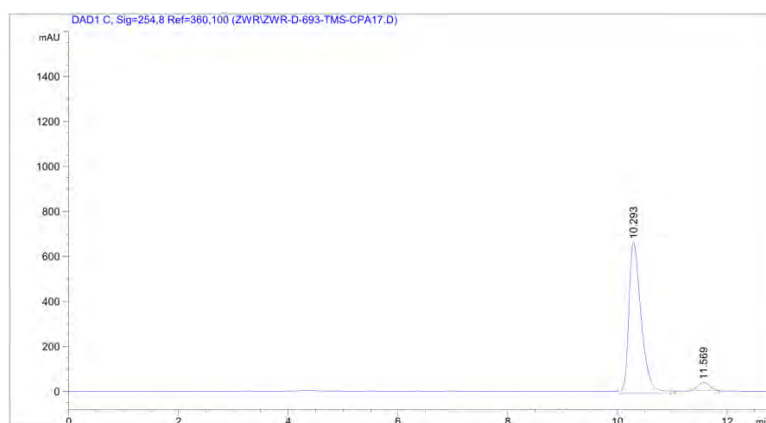

信号 1: DAD1 C, Sig=254,8 Ref=360,100

| 峰 # | 保留时间 [min] | 类型   | 峰宽 [min] | 峰面积 [mAU*s] | 峰高 [mAU]  | 峰面积 %   |
|-----|------------|------|----------|-------------|-----------|---------|
| 1   | 10.293     | MM R | 0.2614   | 1.05582e4   | 673.16754 | 95.3145 |
| 2   | 11.569     | MM R | 0.2363   | 519.01892   | 36.60696  | 4.6855  |

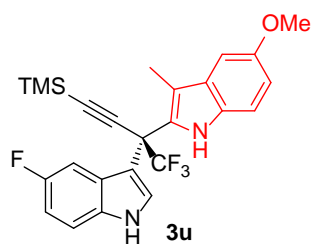

### HPLC spectrum of the racemate

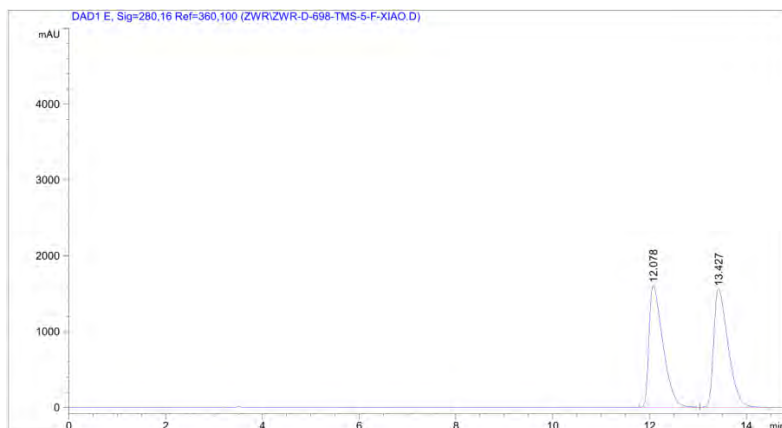

信号 1: DAD1 E, Sig=280,16 Ref=360,100

| 峰 # | 保留时间 [min] | 类型 | 峰宽 [min] | 峰面积 [mAU*s] | 峰高 [mAU]   | 峰面积 %   |
|-----|------------|----|----------|-------------|------------|---------|
| 1   | 12.078     | BV | 0.3011   | 3.21646e4   | 1610.18188 | 49.9428 |
| 2   | 13.427     | VB | 0.3128   | 3.22383e4   | 1562.22375 | 50.0572 |

### HPLC spectrum of the enantioenriched compound

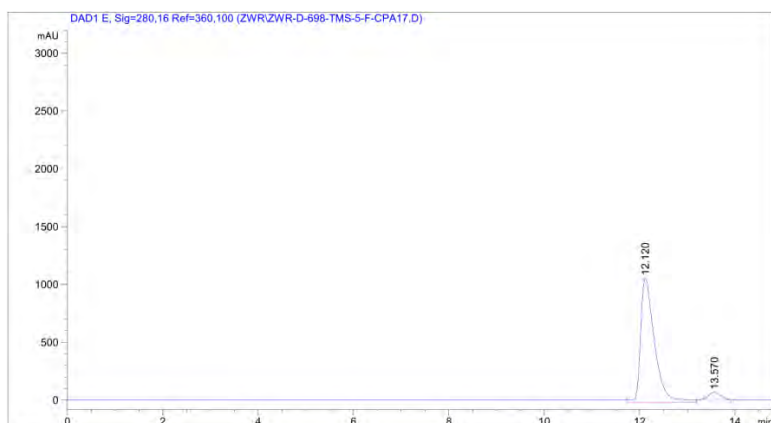

信号 1: DAD1 E, Sig=280,16 Ref=360,100

| 峰 # | 保留时间 [min] | 类型   | 峰宽 [min] | 峰面积 [mAU*s] | 峰高 [mAU]   | 峰面积 %   |
|-----|------------|------|----------|-------------|------------|---------|
| 1   | 12.120     | MM R | 0.3359   | 2.16318e4   | 1073.26624 | 95.1586 |
| 2   | 13.570     | MM R | 0.2876   | 1100.56824  | 63.77062   | 4.8414  |

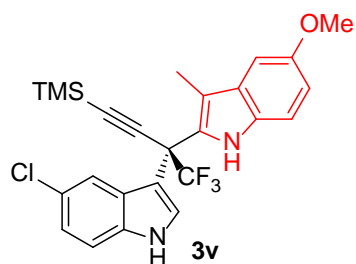

### HPLC spectrum of the racemate

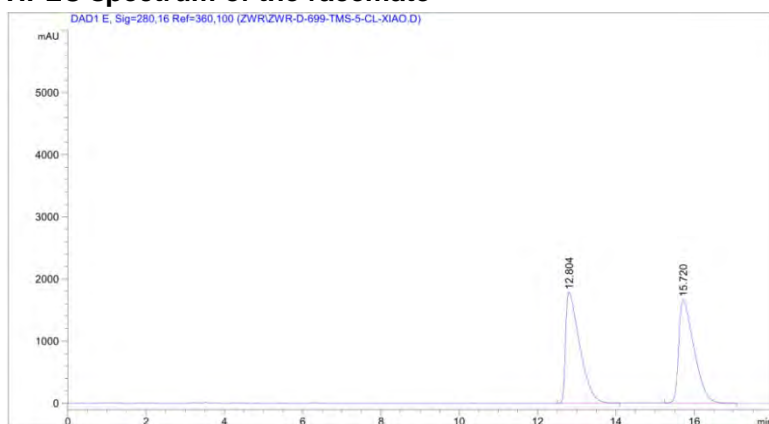

信号 1: DAD1 E, Sig=280,16 Ref=360,100

| 峰 # | 保留时间 [min] | 类型 | 峰宽 [min] | 峰面积 [mAU*s] | 峰高 [mAU]   | 峰面积 %   |
|-----|------------|----|----------|-------------|------------|---------|
| 1   | 12.804     | BB | 0.3730   | 4.44724e4   | 1783.17285 | 49.7942 |
| 2   | 15.720     | VB | 0.4085   | 4.48399e4   | 1663.29932 | 50.2058 |

### HPLC spectrum of the enantioenriched compound

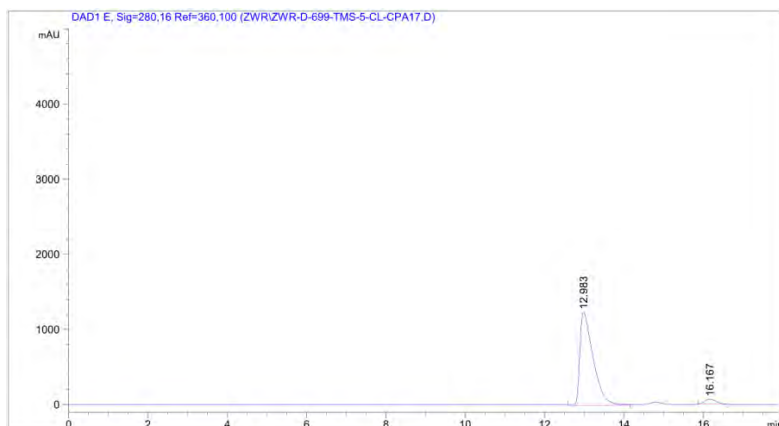

信号 1: DAD1 E, Sig=280,16 Ref=360,100

| 峰 # | 保留时间 [min] | 类型   | 峰宽 [min] | 峰面积 [mAU*s] | 峰高 [mAU]   | 峰面积 %   |
|-----|------------|------|----------|-------------|------------|---------|
| 1   | 12.983     | MM R | 0.3891   | 2.90762e4   | 1245.42590 | 96.1490 |
| 2   | 16.167     | MM R | 0.3108   | 1164.57947  | 62.45669   | 3.8510  |

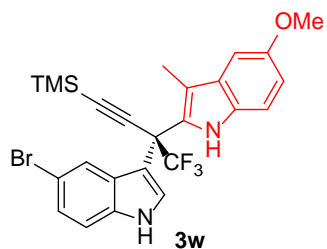

### HPLC spectrum of the racemate

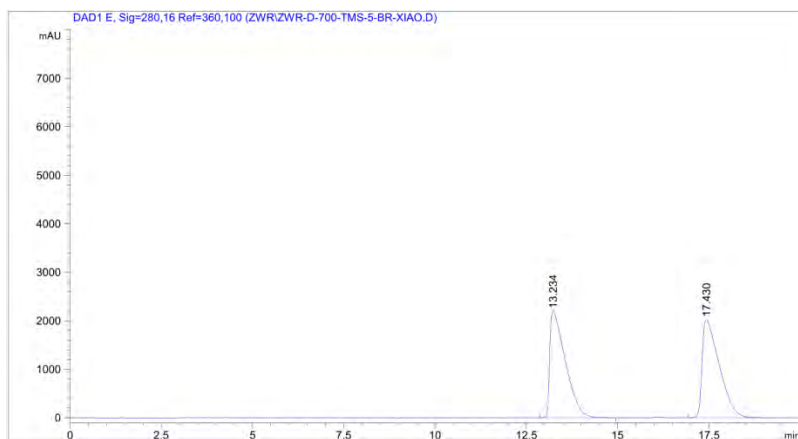

信号 1: DAD1 E, Sig=280,16 Ref=360,100

| 峰 # | 保留时间 [min] | 类型 | 峰宽 [min] | 峰面积 [mAU*s] | 峰高 [mAU]   | 峰面积 %   |
|-----|------------|----|----------|-------------|------------|---------|
| 1   | 13.234     | BB | 0.4420   | 6.50890e4   | 2194.81934 | 49.6896 |
| 2   | 17.430     | BB | 0.5001   | 6.59021e4   | 2022.59131 | 50.3104 |

### HPLC spectrum of the enantioenriched compound

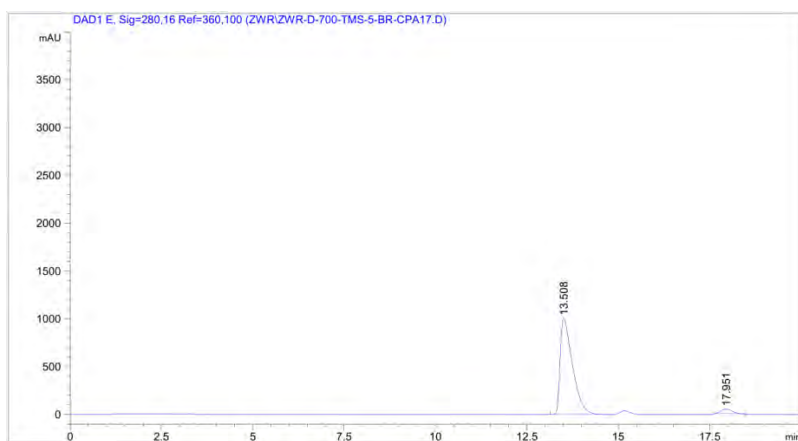

信号 1: DAD1 E, Sig=280,16 Ref=360,100

| 峰 # | 保留时间 [min] | 类型   | 峰宽 [min] | 峰面积 [mAU*s] | 峰高 [mAU]   | 峰面积 %   |
|-----|------------|------|----------|-------------|------------|---------|
| 1   | 13.508     | MM R | 0.3918   | 2.36695e4   | 1006.85883 | 96.1935 |
| 2   | 17.951     | MM R | 0.3364   | 936.64240   | 46.41051   | 3.8065  |



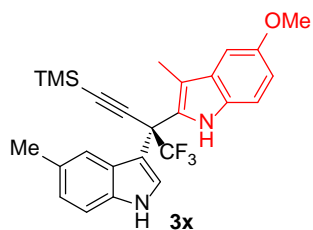

### HPLC spectrum of the racemate

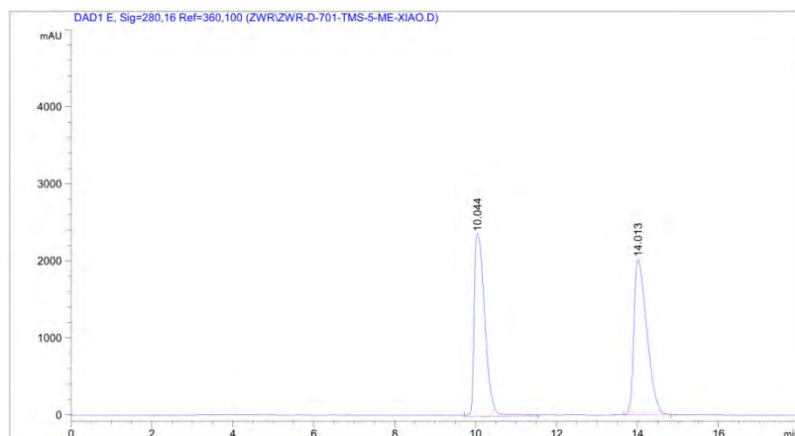

信号 1: DAD1 E, Sig=280,16 Ref=360,100

| 峰 # | 保留时间 [min] | 类型   | 峰宽 [min] | 峰面积 [mAU*s] | 峰高 [mAU]   | 峰面积 %   |
|-----|------------|------|----------|-------------|------------|---------|
| 1   | 10.044     | MM R | 0.3078   | 4.36345e4   | 2362.91504 | 49.5317 |
| 2   | 14.013     | MM R | 0.3682   | 4.44595e4   | 2012.68262 | 50.4683 |

### HPLC spectrum of the enantioenriched compound

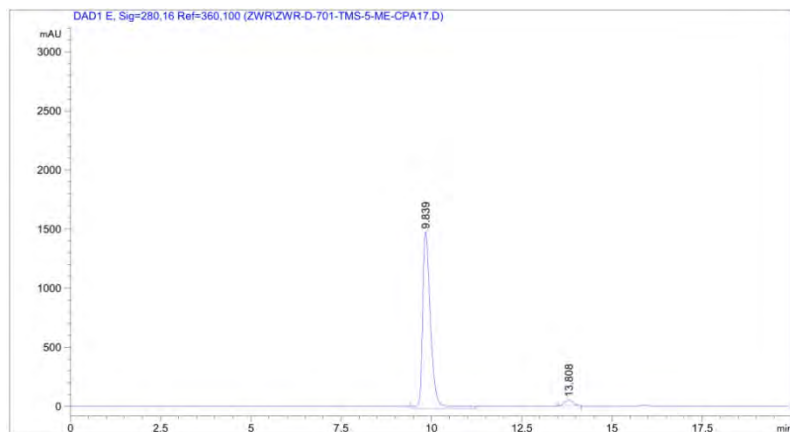

信号 1: DAD1 E, Sig=280,16 Ref=360,100

| 峰 # | 保留时间 [min] | 类型   | 峰宽 [min] | 峰面积 [mAU*s] | 峰高 [mAU]   | 峰面积 %   |
|-----|------------|------|----------|-------------|------------|---------|
| 1   | 9.839      | MM R | 0.2594   | 2.32625e4   | 1494.76379 | 96.5810 |
| 2   | 13.808     | MM R | 0.2784   | 823.50031   | 49.29202   | 3.4190  |

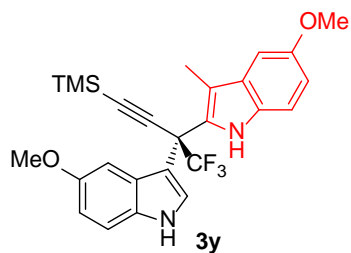

### HPLC spectrum of the racemate

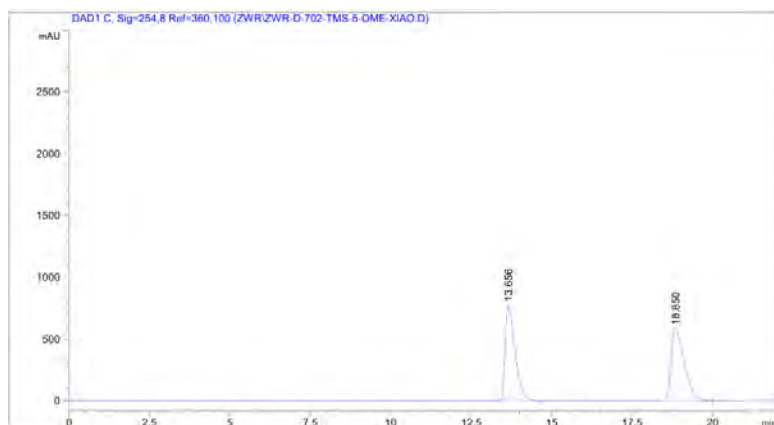

信号 1: DAD1 C, Sig=254,8 Ref=360,100

| 峰 # | 保留时间 [min] | 类型 | 峰宽 [min] | 峰面积 [mAU*s] | 峰高 [mAU]  | 峰面积 %   |
|-----|------------|----|----------|-------------|-----------|---------|
| 1   | 13.656     | BB | 0.3203   | 1.66181e4   | 780.74896 | 49.9581 |
| 2   | 18.850     | BB | 0.4242   | 1.66460e4   | 591.63928 | 50.0419 |

### HPLC spectrum of the enantioenriched compound

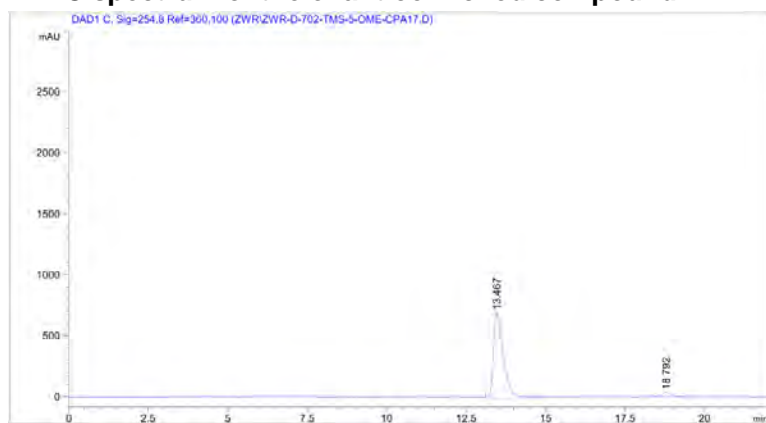

信号 1: DAD1 C, Sig=254,8 Ref=360,100

| 峰 # | 保留时间 [min] | 类型   | 峰宽 [min] | 峰面积 [mAU*s] | 峰高 [mAU]  | 峰面积 %   |
|-----|------------|------|----------|-------------|-----------|---------|
| 1   | 13.467     | MM R | 0.3682   | 1.54034e4   | 697.23822 | 95.1608 |
| 2   | 18.792     | MM R | 0.3939   | 783.30676   | 33.14393  | 4.8392  |

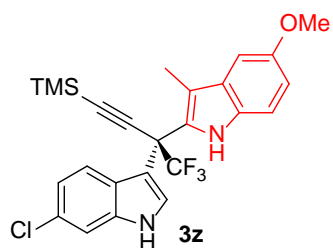

### HPLC spectrum of the racemate

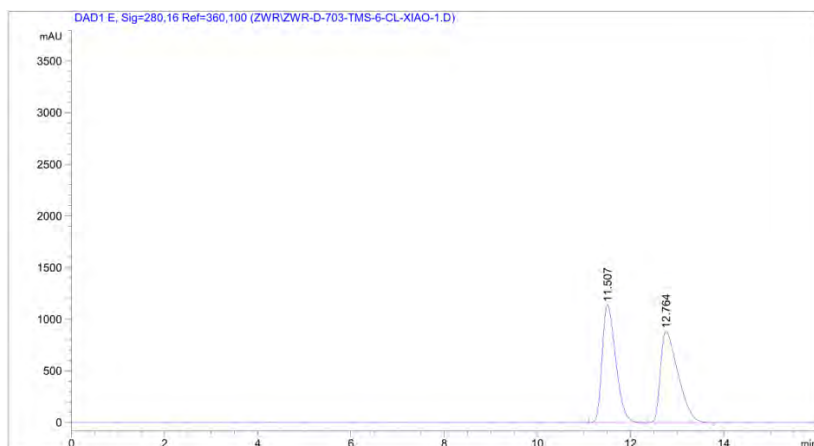

信号 1: DAD1 E, Sig=280,16 Ref=360,100

| 峰 # | 保留时间 [min] | 类型 | 峰宽 [min] | 峰面积 [mAU*s] | 峰高 [mAU]   | 峰面积 %   |
|-----|------------|----|----------|-------------|------------|---------|
| 1   | 11.507     | BB | 0.3125   | 2.28707e4   | 1138.02161 | 49.9142 |
| 2   | 12.764     | BB | 0.3958   | 2.29492e4   | 881.37604  | 50.0858 |

### HPLC spectrum of the enantioenriched compound

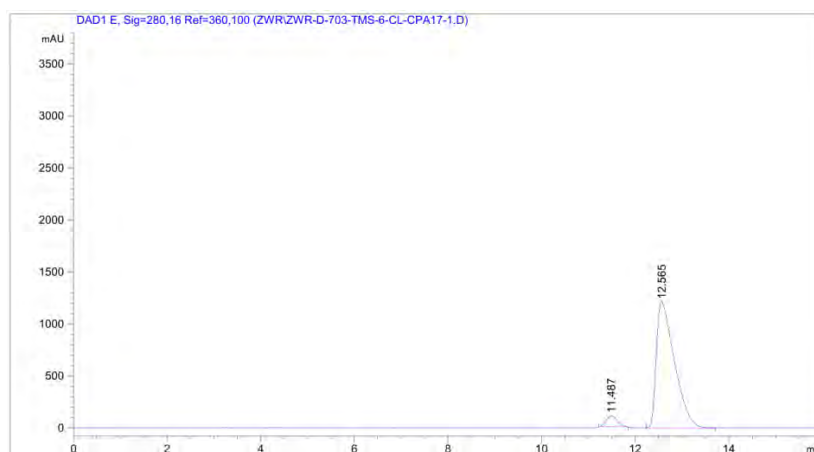

信号 1: DAD1 E, Sig=280,16 Ref=360,100

| 峰 # | 保留时间 [min] | 类型   | 峰宽 [min] | 峰面积 [mAU*s] | 峰高 [mAU]   | 峰面积 %   |
|-----|------------|------|----------|-------------|------------|---------|
| 1   | 11.487     | MM R | 0.2751   | 1666.25854  | 100.95464  | 4.8623  |
| 2   | 12.565     | MM R | 0.4481   | 3.26028e4   | 1212.55920 | 95.1377 |

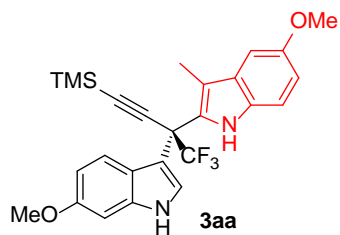

### HPLC spectrum of the racemate

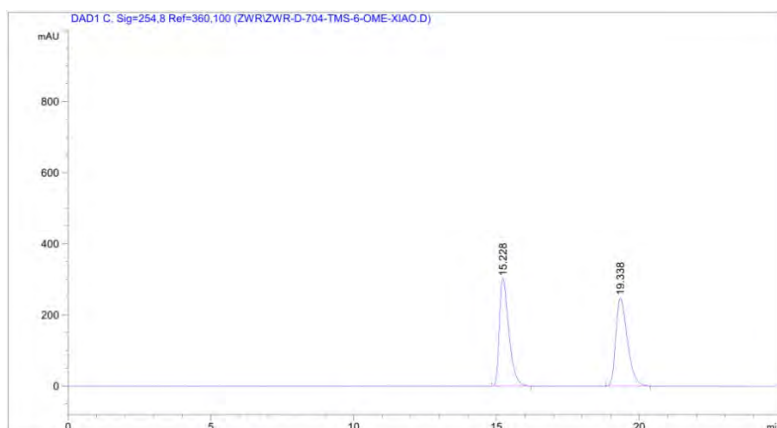

信号 1: DAD1 C, Sig=254,8 Ref=360,100

| 峰 # | 保留时间 [min] | 类型 | 峰宽 [min] | 峰面积 [mAU*s] | 峰高 [mAU]  | 峰面积 %   |
|-----|------------|----|----------|-------------|-----------|---------|
| 1   | 15.228     | BB | 0.3479   | 6919.55078  | 301.30170 | 49.9879 |
| 2   | 19.338     | BB | 0.4264   | 6922.89209  | 247.48535 | 50.0121 |

### HPLC spectrum of the enantioenriched compound

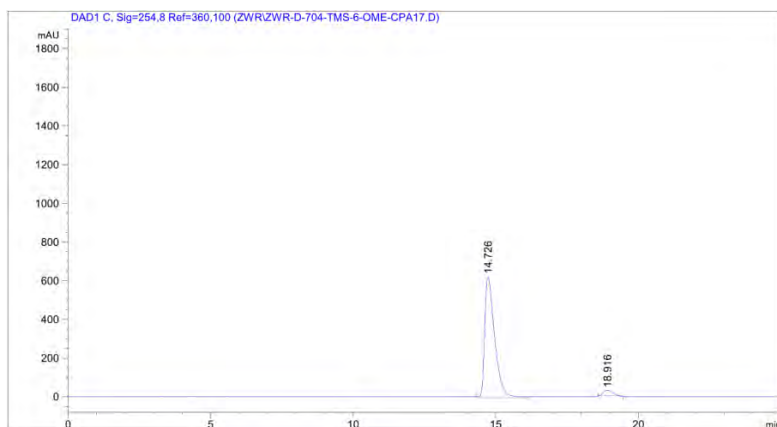

信号 1: DAD1 C, Sig=254,8 Ref=360,100

| 峰 # | 保留时间 [min] | 类型   | 峰宽 [min] | 峰面积 [mAU*s] | 峰高 [mAU]  | 峰面积 %   |
|-----|------------|------|----------|-------------|-----------|---------|
| 1   | 14.726     | MM R | 0.4033   | 1.51441e4   | 625.91077 | 96.0103 |
| 2   | 18.916     | MM R | 0.3660   | 629.30676   | 28.65499  | 3.9897  |

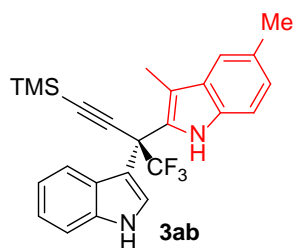

### HPLC spectrum of the racemate

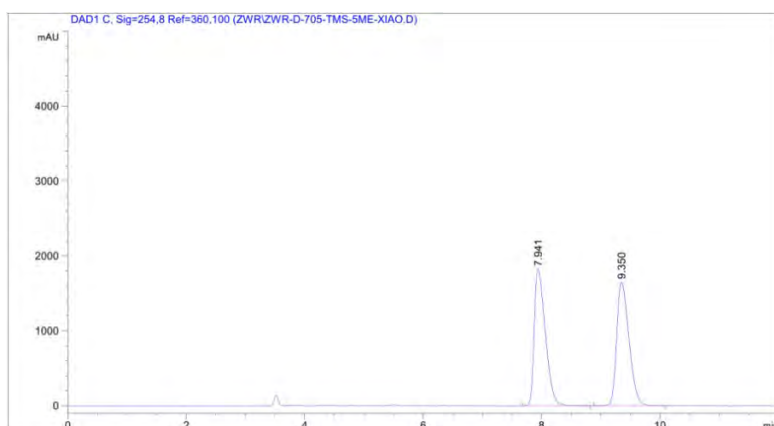

信号 1: DAD1 C, Sig=254,8 Ref=360,100

| 峰 # | 保留时间 [min] | 类型 | 峰宽 [min] | 峰面积 [mAU*s] | 峰高 [mAU]   | 峰面积 %   |
|-----|------------|----|----------|-------------|------------|---------|
| 1   | 7.941      | BB | 0.1993   | 2.36587e4   | 1824.72083 | 49.9534 |
| 2   | 9.350      | BB | 0.2236   | 2.37028e4   | 1650.22241 | 50.0466 |

### HPLC spectrum of the enantioenriched compound

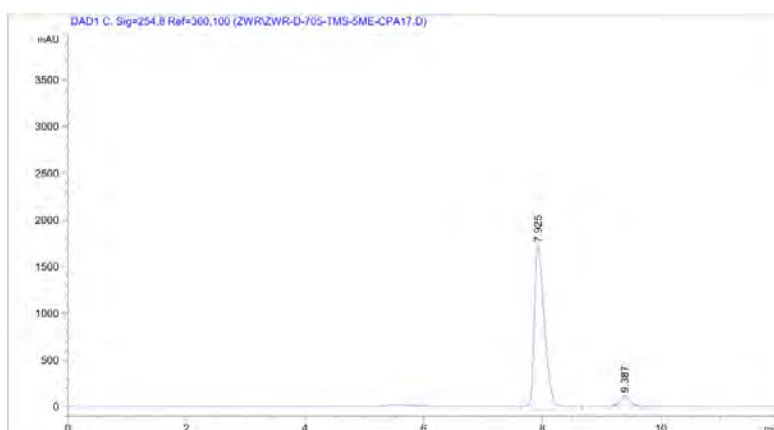

信号 1: DAD1 C, Sig=254,8 Ref=360,100

| 峰 # | 保留时间 [min] | 类型   | 峰宽 [min] | 峰面积 [mAU*s] | 峰高 [mAU]   | 峰面积 %   |
|-----|------------|------|----------|-------------|------------|---------|
| 1   | 7.925      | MM R | 0.2088   | 2.20974e4   | 1763.84900 | 94.8284 |
| 2   | 9.387      | MM R | 0.1832   | 1205.11243  | 109.66250  | 5.1716  |

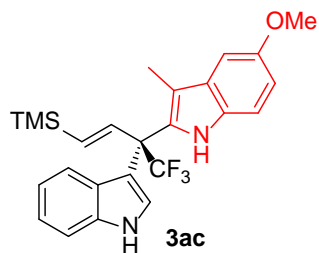

### HPLC spectrum of the racemate

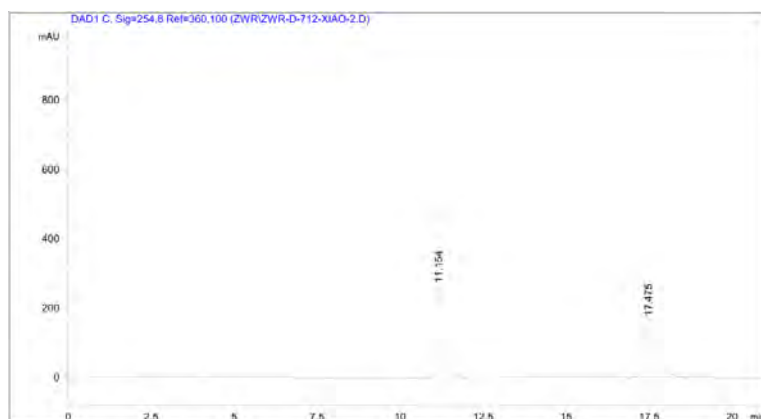

信号 1: DAD1 C, Sig=254,8 Ref=360,100

| 峰 # | 保留时间 [min] | 类型 | 峰宽 [min] | 峰面积 [mAU*s] | 峰高 [mAU]  | 峰面积 %   |
|-----|------------|----|----------|-------------|-----------|---------|
| 1   | 11.154     | BB | 0.2902   | 5005.32275  | 265.21338 | 50.0068 |
| 2   | 17.475     | BB | 0.4572   | 5003.96680  | 169.09886 | 49.9932 |

### HPLC spectrum of the enantioenriched compound

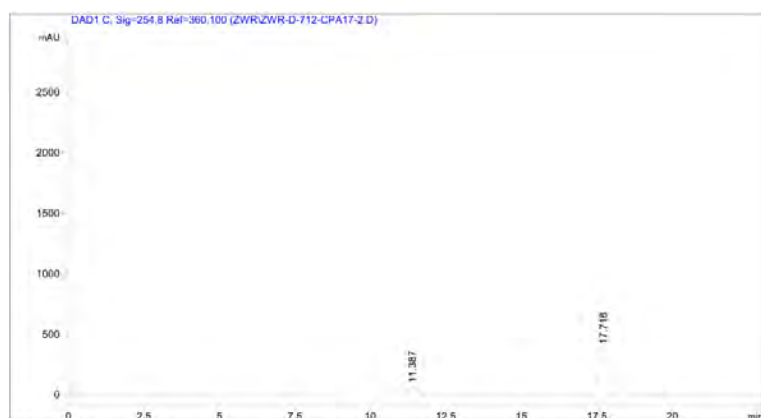

信号 1: DAD1 C, Sig=254,8 Ref=360,100

| 峰 # | 保留时间 [min] | 类型   | 峰宽 [min] | 峰面积 [mAU*s] | 峰高 [mAU]  | 峰面积 %   |
|-----|------------|------|----------|-------------|-----------|---------|
| 1   | 11.387     | MM R | 0.2532   | 971.84827   | 63.97219  | 5.9178  |
| 2   | 17.718     | MM R | 0.6345   | 1.54505e4   | 405.85901 | 94.0822 |

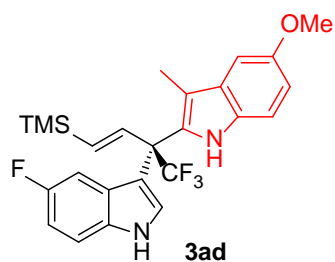

### HPLC spectrum of the racemate

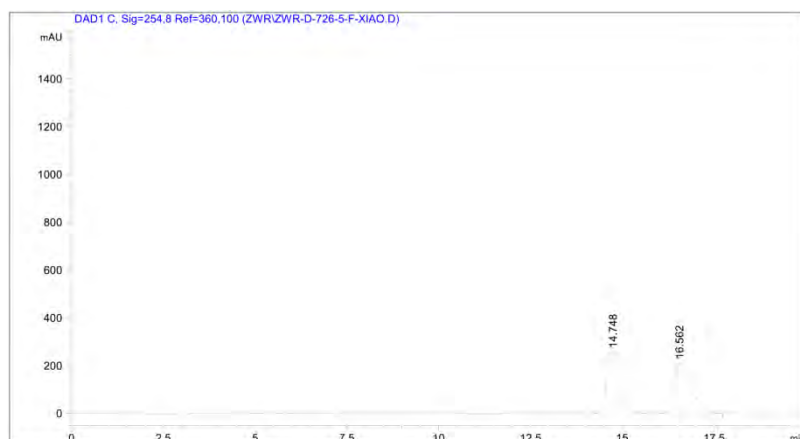

信号 1: DAD1 C, Sig=254,8 Ref=360,100

| 峰 # | 保留时间 [min] | 类型 | 峰宽 [min] | 峰面积 [mAU*s] | 峰高 [mAU]  | 峰面积 %   |
|-----|------------|----|----------|-------------|-----------|---------|
| 1   | 14.748     | BB | 0.4316   | 7315.77100  | 262.16068 | 50.0307 |
| 2   | 16.562     | BB | 0.5191   | 7306.79443  | 214.67160 | 49.9693 |

### HPLC spectrum of the enantioenriched compound

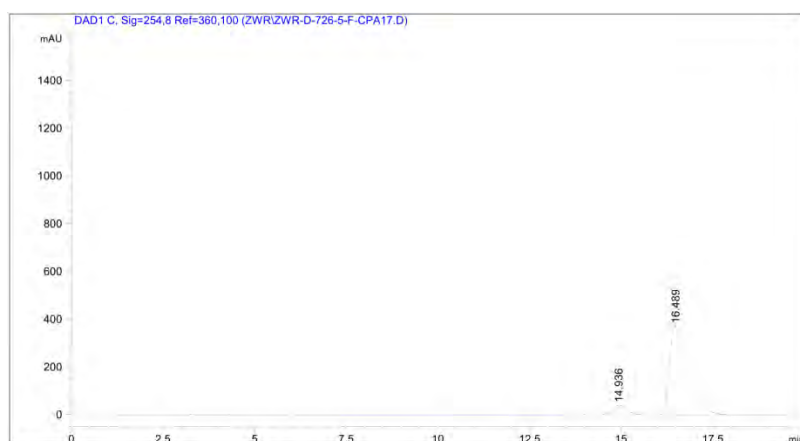

信号 1: DAD1 C, Sig=254,8 Ref=360,100

| 峰 # | 保留时间 [min] | 类型   | 峰宽 [min] | 峰面积 [mAU*s] | 峰高 [mAU]  | 峰面积 %   |
|-----|------------|------|----------|-------------|-----------|---------|
| 1   | 14.936     | MM R | 0.4300   | 1022.55518  | 39.63531  | 6.9599  |
| 2   | 16.489     | BB   | 0.5529   | 1.36694e4   | 370.06607 | 93.0401 |

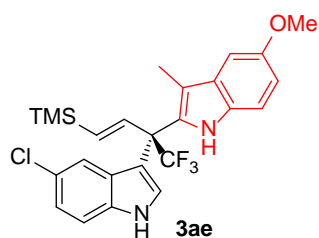

### HPLC spectrum of the racemate

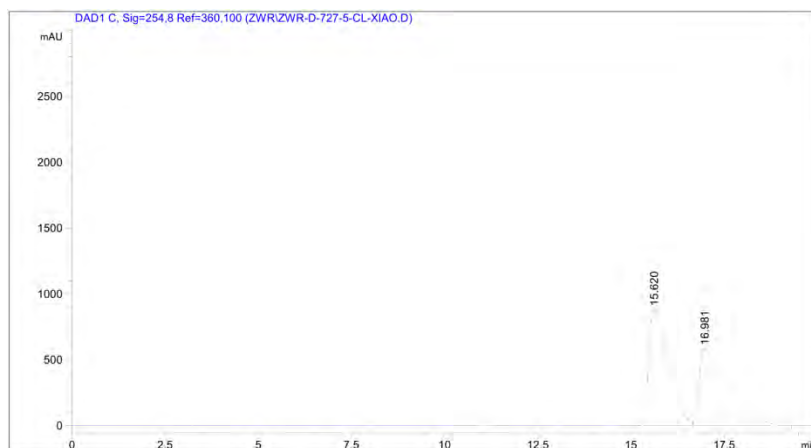

信号 1: DAD1 C, Sig=254,8 Ref=360,100

| 峰 # | 保留时间 [min] | 类型 | 峰宽 [min] | 峰面积 [mAU*s] | 峰高 [mAU]  | 峰面积 %   |
|-----|------------|----|----------|-------------|-----------|---------|
| 1   | 15.620     | BV | 0.5282   | 3.14515e4   | 885.83234 | 49.7417 |
| 2   | 16.981     | VB | 0.7561   | 3.17781e4   | 588.40460 | 50.2583 |

### HPLC spectrum of the enantioenriched compound

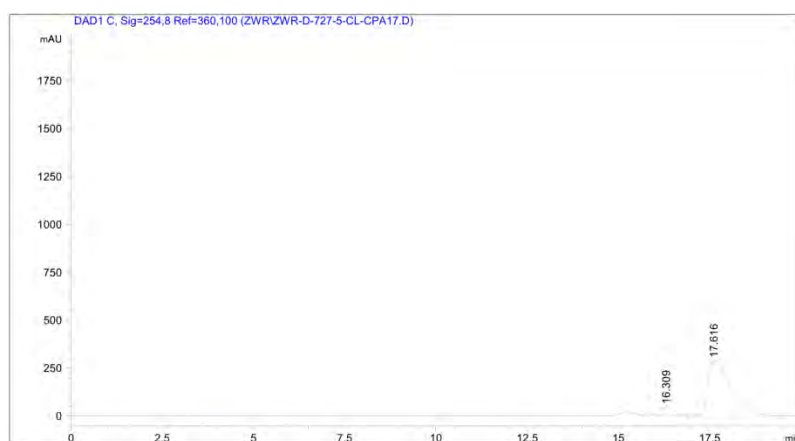

信号 1: DAD1 C, Sig=254,8 Ref=360,100

| 峰 # | 保留时间 [min] | 类型   | 峰宽 [min] | 峰面积 [mAU*s] | 峰高 [mAU]  | 峰面积 %   |
|-----|------------|------|----------|-------------|-----------|---------|
| 1   | 16.309     | MM R | 0.4197   | 1049.72693  | 41.68451  | 6.9926  |
| 2   | 17.616     | MM R | 0.7835   | 1.39622e4   | 297.01636 | 93.0074 |



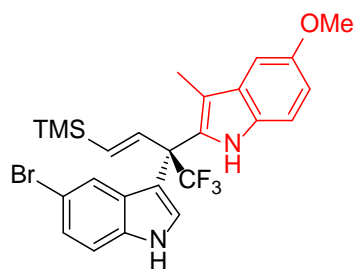

### HPLC spectrum of the racemate

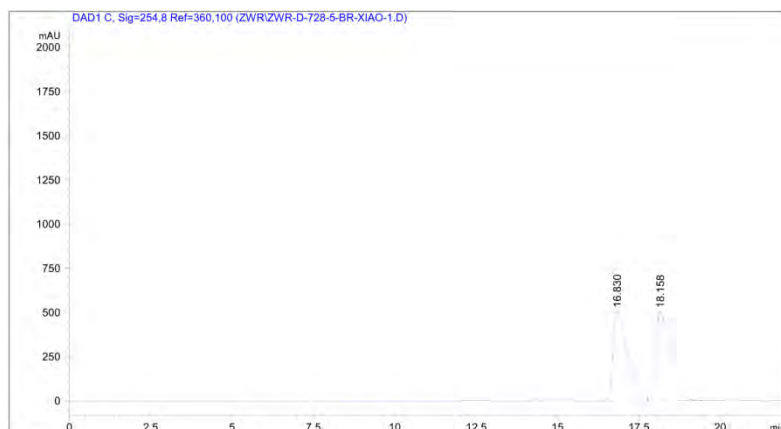

信号 1: DAD1 C, Sig=254,8 Ref=360,100

| 峰 # | 保留时间 [min] | 类型 | 峰宽 [min] | 峰面积 [mAU*s] | 峰高 [mAU]  | 峰面积 %   |
|-----|------------|----|----------|-------------|-----------|---------|
| 1   | 16.830     | BV | 0.4515   | 1.56597e4   | 511.06479 | 49.9001 |
| 2   | 18.158     | VB | 0.4611   | 1.57224e4   | 508.03201 | 50.0999 |

### HPLC spectrum of the enantioenriched compound

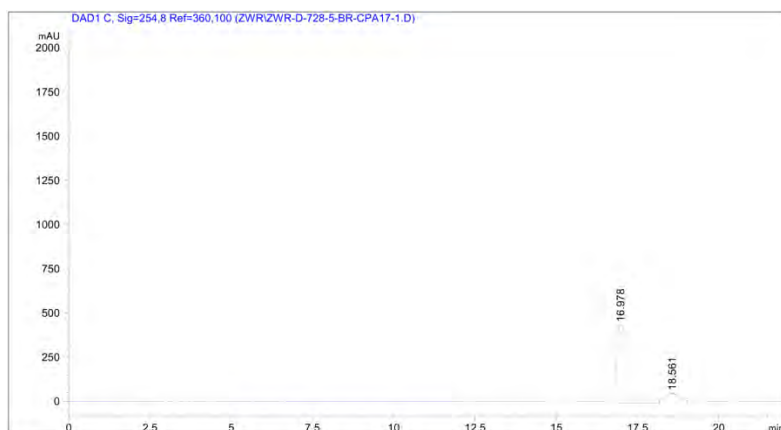

信号 1: DAD1 C, Sig=254,8 Ref=360,100

| 峰 # | 保留时间 [min] | 类型   | 峰宽 [min] | 峰面积 [mAU*s] | 峰高 [mAU]  | 峰面积 %   |
|-----|------------|------|----------|-------------|-----------|---------|
| 1   | 16.978     | MM R | 0.5373   | 1.42577e4   | 442.23758 | 92.5973 |
| 2   | 18.561     | MM R | 0.4350   | 1139.83740  | 43.67155  | 7.4027  |

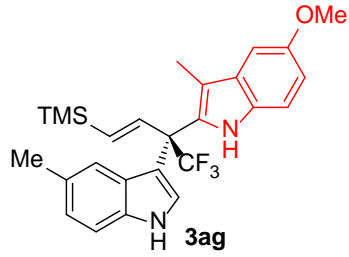

### HPLC spectrum of the racemate

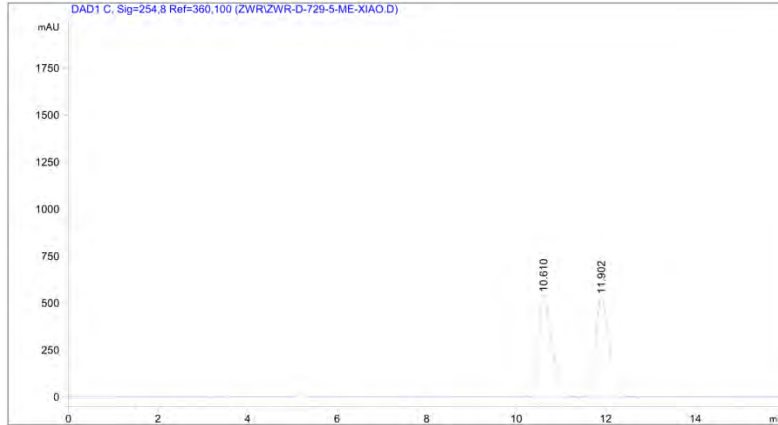

信号 1: DAD1 C, Sig=254,8 Ref=360,100

| 峰 # | 保留时间 [min] | 类型 | 峰宽 [min] | 峰面积 [mAU*s] | 峰高 [mAU]  | 峰面积 %   |
|-----|------------|----|----------|-------------|-----------|---------|
| 1   | 10.610     | BB | 0.3157   | 1.11858e4   | 544.41431 | 49.9301 |
| 2   | 11.902     | BB | 0.3230   | 1.12171e4   | 534.07703 | 50.0699 |

### HPLC spectrum of the enantioenriched compound

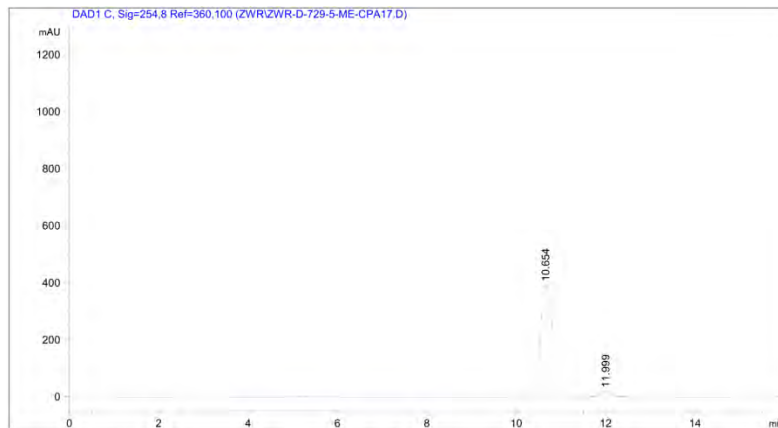

信号 1: DAD1 C, Sig=254,8 Ref=360,100

| 峰 # | 保留时间 [min] | 类型   | 峰宽 [min] | 峰面积 [mAU*s] | 峰高 [mAU]  | 峰面积 %   |
|-----|------------|------|----------|-------------|-----------|---------|
| 1   | 10.654     | MM R | 0.3619   | 8763.27832  | 403.59097 | 96.0228 |
| 2   | 11.999     | MM R | 0.2905   | 362.96869   | 20.82593  | 3.9772  |

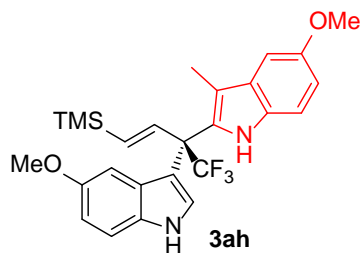

### HPLC spectrum of the racemate

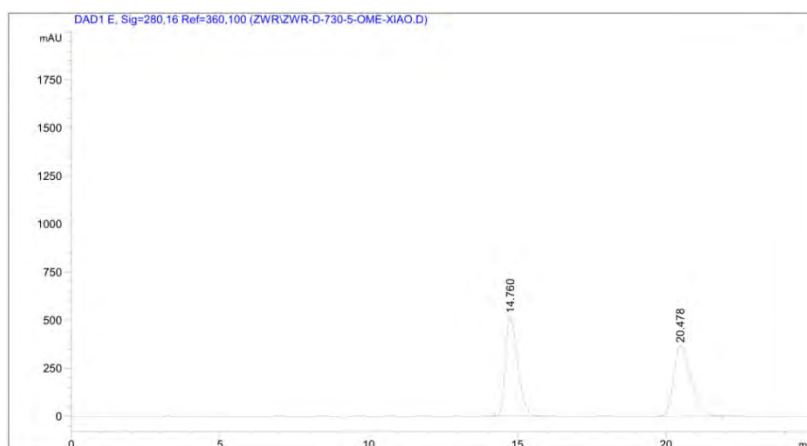

信号 1: DAD1 E, Sig=280,16 Ref=360,100

| 峰 # | 保留时间 [min] | 类型 | 峰宽 [min] | 峰面积 [mAU*s] | 峰高 [mAU]  | 峰面积 %   |
|-----|------------|----|----------|-------------|-----------|---------|
| 1   | 14.760     | BB | 0.4425   | 1.49472e4   | 521.30389 | 49.9776 |
| 2   | 20.478     | BB | 0.6252   | 1.49606e4   | 367.26166 | 50.0224 |

### HPLC spectrum of the enantioenriched compound

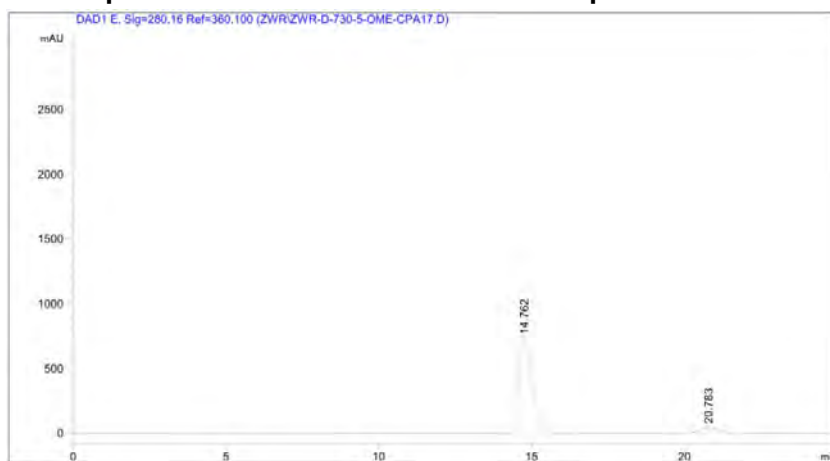

信号 1: DAD1 E, Sig=280,16 Ref=360,100

| 峰 # | 保留时间 [min] | 类型   | 峰宽 [min] | 峰面积 [mAU*s] | 峰高 [mAU]  | 峰面积 %   |
|-----|------------|------|----------|-------------|-----------|---------|
| 1   | 14.762     | MM R | 0.5211   | 2.34891e4   | 751.29974 | 94.2813 |
| 2   | 20.783     | MM R | 0.5575   | 1424.74719  | 42.59464  | 5.7187  |

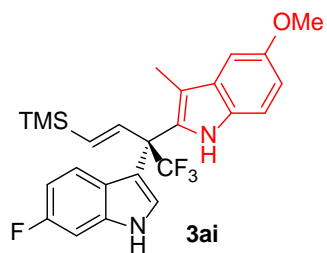

### HPLC spectrum of the racemate

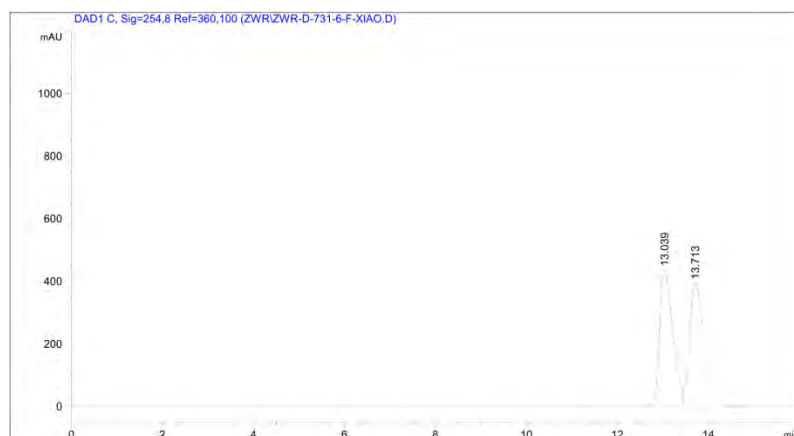

信号 1: DAD1 C, Sig=254,8 Ref=360,100

| 峰 # | 保留时间 [min] | 类型 | 峰宽 [min] | 峰面积 [mAU*s] | 峰高 [mAU]  | 峰面积 %   |
|-----|------------|----|----------|-------------|-----------|---------|
| 1   | 13.039     | BV | 0.3026   | 8667.82422  | 438.44479 | 49.0873 |
| 2   | 13.713     | VB | 0.3449   | 8990.16406  | 395.98444 | 50.9127 |

### HPLC spectrum of the enantioenriched compound

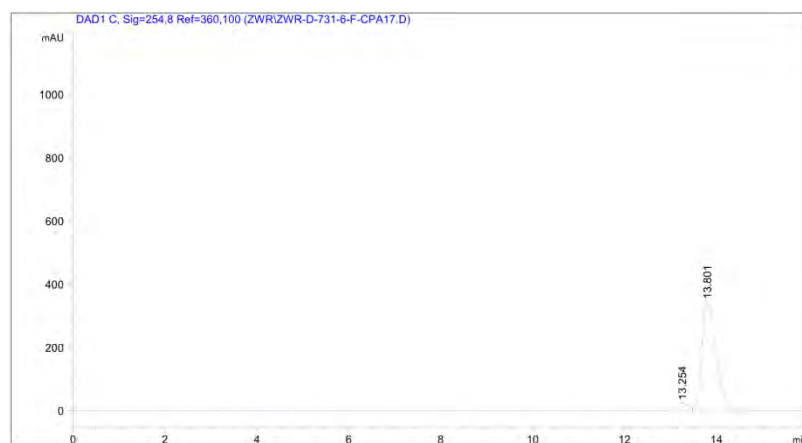

信号 1: DAD1 C, Sig=254,8 Ref=360,100

| 峰 # | 保留时间 [min] | 类型   | 峰宽 [min] | 峰面积 [mAU*s] | 峰高 [mAU]  | 峰面积 %   |
|-----|------------|------|----------|-------------|-----------|---------|
| 1   | 13.254     | MM R | 0.2745   | 361.30197   | 21.93702  | 4.5961  |
| 2   | 13.801     | MM R | 0.3648   | 7499.71875  | 342.66599 | 95.4039 |

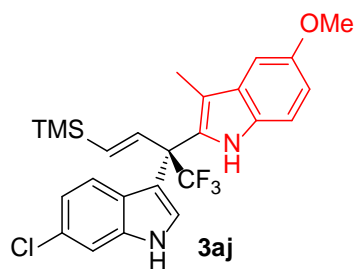

### HPLC spectrum of the racemate

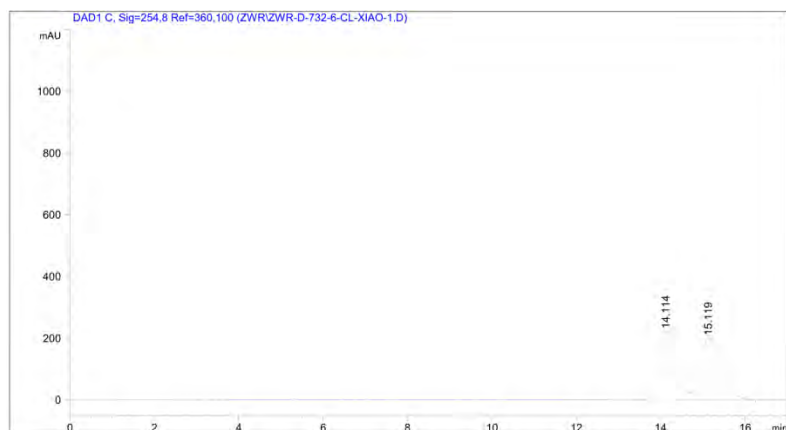

信号 1: DAD1 C, Sig=254,8 Ref=360,100

| 峰 # | 保留时间 [min] | 类型 | 峰宽 [min] | 峰面积 [mAU*s] | 峰高 [mAU]  | 峰面积 %   |
|-----|------------|----|----------|-------------|-----------|---------|
| 1   | 14.114     | VV | 0.4605   | 6594.54102  | 220.75128 | 49.3701 |
| 2   | 15.119     | VB | 0.5224   | 6762.82373  | 199.01604 | 50.6299 |

### HPLC spectrum of the enantioenriched compound

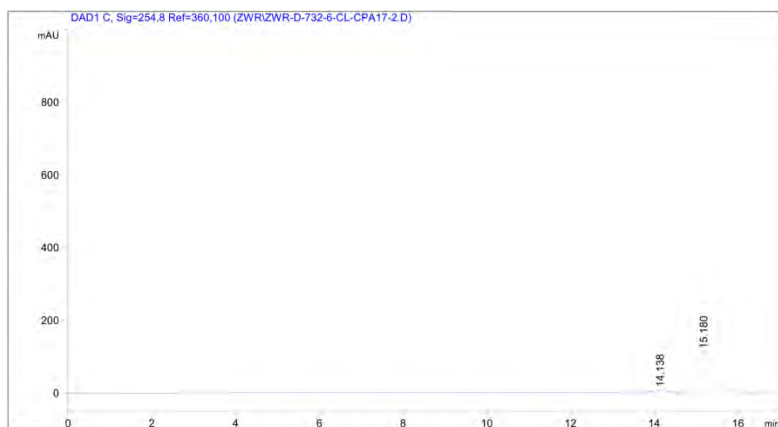

信号 1: DAD1 C, Sig=254,8 Ref=360,100

| 峰 # | 保留时间 [min] | 类型   | 峰宽 [min] | 峰面积 [mAU*s] | 峰高 [mAU]  | 峰面积 %   |
|-----|------------|------|----------|-------------|-----------|---------|
| 1   | 14.138     | MM R | 0.3566   | 152.70886   | 7.13666   | 4.2460  |
| 2   | 15.180     | MM R | 0.5024   | 3443.86572  | 114.25408 | 95.7540 |

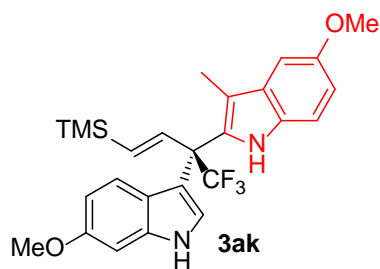

### HPLC spectrum of the racemate

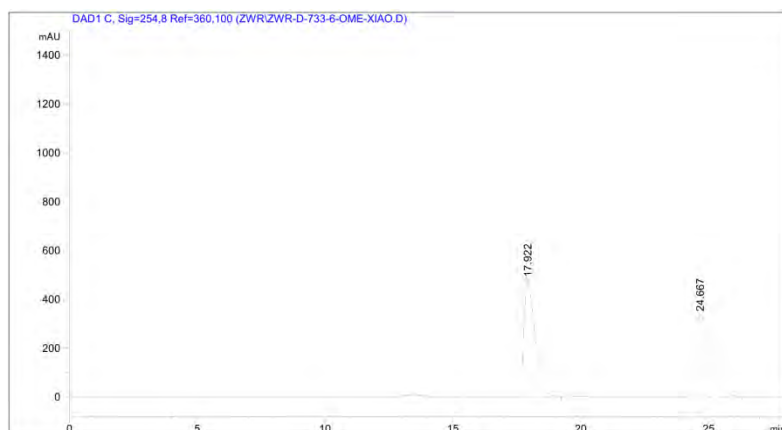

信号 1: DAD1 C, Sig=254,8 Ref=360,100

| 峰 # | 保留时间 [min] | 类型 | 峰宽 [min] | 峰面积 [mAU*s] | 峰高 [mAU]  | 峰面积 %   |
|-----|------------|----|----------|-------------|-----------|---------|
| 1   | 17.922     | BB | 0.4615   | 1.45044e4   | 478.70517 | 49.9259 |
| 2   | 24.667     | BB | 0.6430   | 1.45475e4   | 337.40710 | 50.0741 |

### HPLC spectrum of the enantioenriched compound

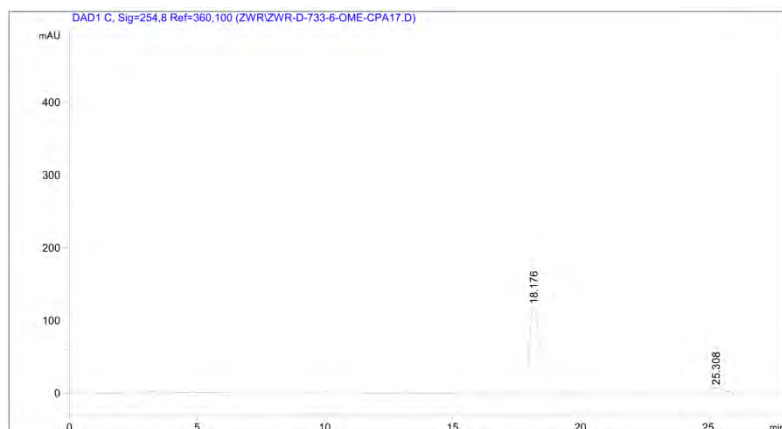

信号 1: DAD1 C, Sig=254,8 Ref=360,100

| 峰 # | 保留时间 [min] | 类型   | 峰宽 [min] | 峰面积 [mAU*s] | 峰高 [mAU]  | 峰面积 %   |
|-----|------------|------|----------|-------------|-----------|---------|
| 1   | 18.176     | MM R | 0.5185   | 3759.74878  | 120.85401 | 95.0575 |
| 2   | 25.308     | MM R | 0.5499   | 195.48825   | 5.92469   | 4.9425  |

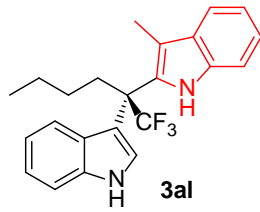

### HPLC spectrum of the racemate

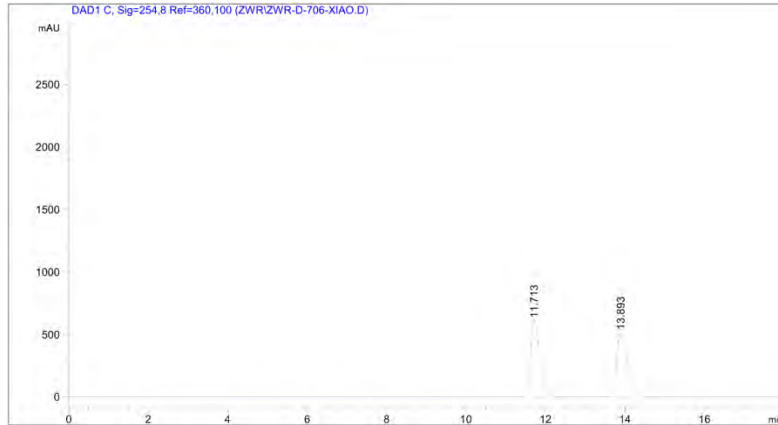

信号 1: DAD1 C, Sig=254,8 Ref=360,100

| 峰 # | 保留时间 [min] | 类型 | 峰宽 [min] | 峰面积 [mAU*s] | 峰高 [mAU]  | 峰面积 %   |
|-----|------------|----|----------|-------------|-----------|---------|
| 1   | 11.713     | BB | 0.2492   | 9979.28418  | 608.98273 | 49.9893 |
| 2   | 13.893     | BB | 0.2964   | 9983.56543  | 514.44531 | 50.0107 |

### HPLC spectrum of the enantioenriched compound

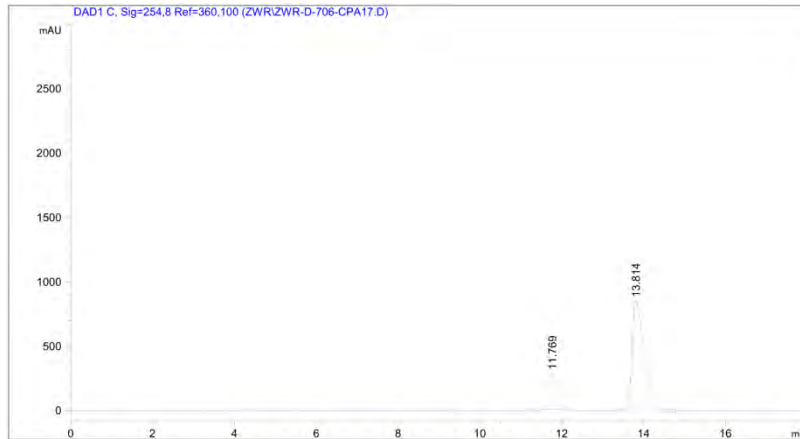

信号 1: DAD1 C, Sig=254,8 Ref=360,100

| 峰 # | 保留时间 [min] | 类型   | 峰宽 [min] | 峰面积 [mAU*s] | 峰高 [mAU]  | 峰面积 %   |
|-----|------------|------|----------|-------------|-----------|---------|
| 1   | 11.769     | MM R | 0.2474   | 4191.51953  | 282.40347 | 18.1997 |
| 2   | 13.814     | MM R | 0.3611   | 1.88392e4   | 869.63635 | 81.8003 |

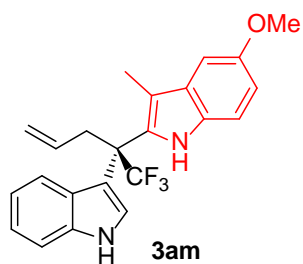

### HPLC spectrum of the racemate

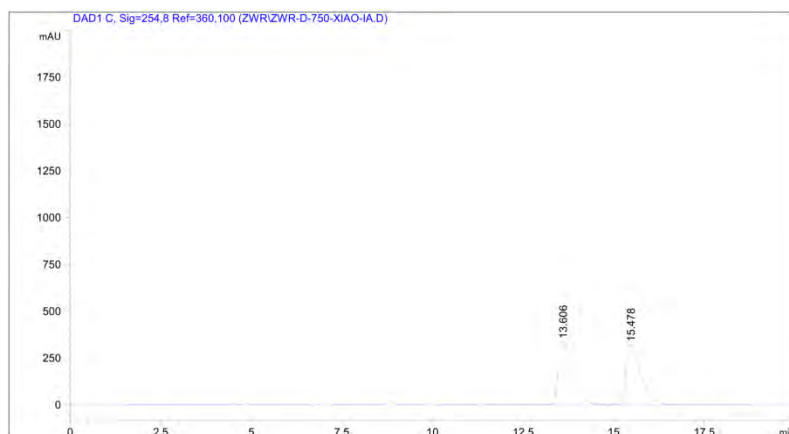

信号 1: DAD1 C, Sig=254,8 Ref=360,100

| 峰 # | 保留时间 [min] | 类型 | 峰宽 [min] | 峰面积 [mAU*s] | 峰高 [mAU]  | 峰面积 %   |
|-----|------------|----|----------|-------------|-----------|---------|
| 1   | 13.606     | BB | 0.4057   | 9075.98047  | 337.54248 | 49.9197 |
| 2   | 15.478     | BB | 0.4282   | 9105.17871  | 321.67676 | 50.0803 |

### HPLC spectrum of the enantioenriched compound

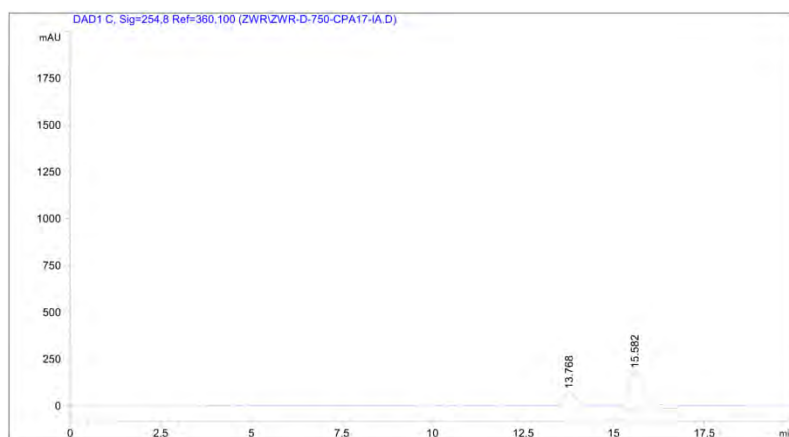

信号 1: DAD1 C, Sig=254,8 Ref=360,100

| 峰 # | 保留时间 [min] | 类型   | 峰宽 [min] | 峰面积 [mAU*s] | 峰高 [mAU]  | 峰面积 %   |
|-----|------------|------|----------|-------------|-----------|---------|
| 1   | 13.768     | MM R | 0.4288   | 1827.74768  | 71.04897  | 21.9259 |
| 2   | 15.582     | MM R | 0.5381   | 6508.27783  | 201.56952 | 78.0741 |



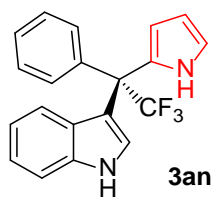

### HPLC spectrum of the racemate

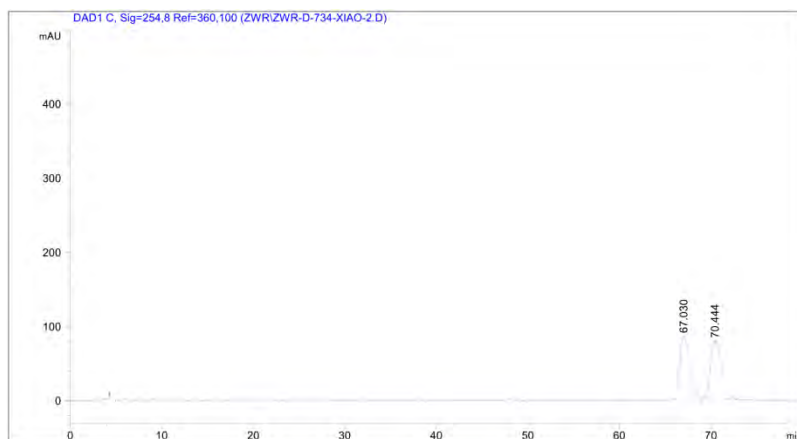

信号 1: DAD1 C, Sig=254,8 Ref=360,100

| 峰 # | 保留时间 [min] | 类型 | 峰宽 [min] | 峰面积 [mAU*s] | 峰高 [mAU] | 峰面积 %   |
|-----|------------|----|----------|-------------|----------|---------|
| 1   | 67.030     | BB | 1.1457   | 6881.92822  | 86.17657 | 50.1159 |
| 2   | 70.444     | BB | 1.3092   | 6850.10645  | 79.02911 | 49.8841 |

### HPLC spectrum of the enantioenriched compound

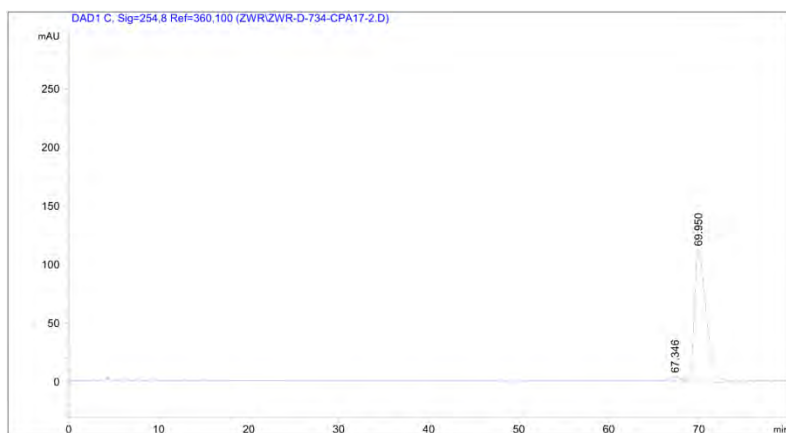

信号 1: DAD1 C, Sig=254,8 Ref=360,100

| 峰 # | 保留时间 [min] | 类型   | 峰宽 [min] | 峰面积 [mAU*s] | 峰高 [mAU]  | 峰面积 %   |
|-----|------------|------|----------|-------------|-----------|---------|
| 1   | 67.346     | MM R | 1.0487   | 231.62749   | 3.68107   | 2.1728  |
| 2   | 69.950     | MM R | 1.5382   | 1.04286e4   | 112.99296 | 97.8272 |

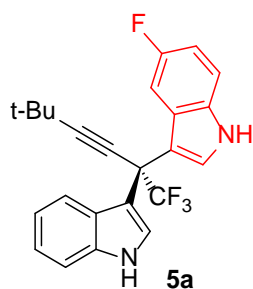

### HPLC spectrum of the racemate

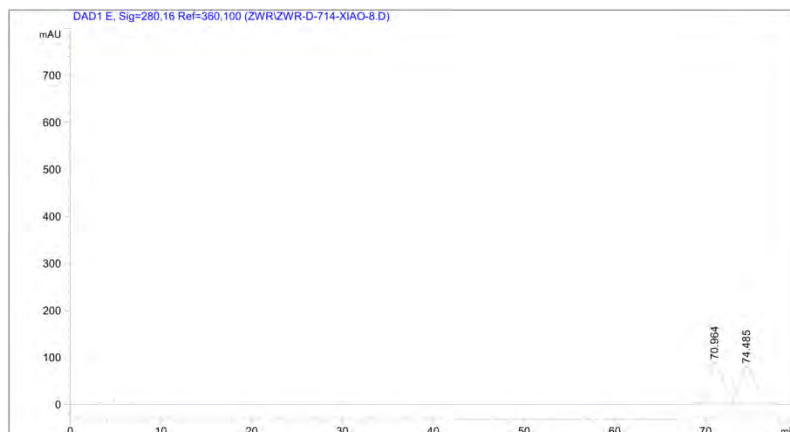

信号 1: DAD1 E, Sig=280,16 Ref=360,100

| 峰 # | 保留时间 [min] | 类型 | 峰宽 [min] | 峰面积 [mAU*s] | 峰高 [mAU] | 峰面积 %   |
|-----|------------|----|----------|-------------|----------|---------|
| 1   | 70.964     | BV | 1.5296   | 9197.25195  | 86.84063 | 49.4288 |
| 2   | 74.485     | VB | 1.6738   | 9409.81836  | 78.87859 | 50.5712 |

### HPLC spectrum of the enantioenriched compound

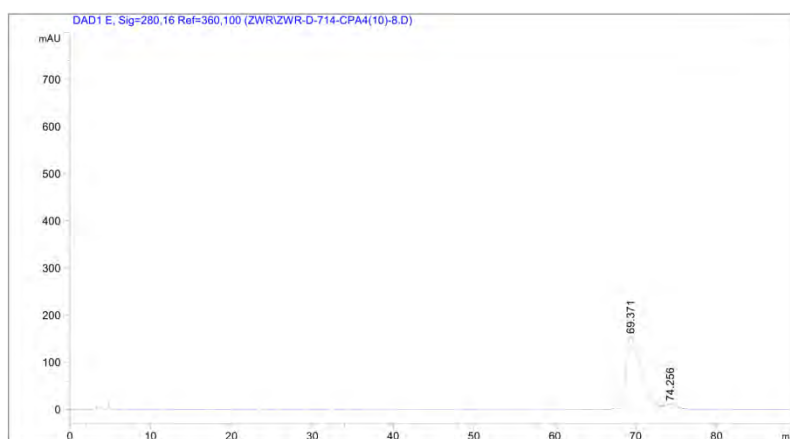

信号 1: DAD1 E, Sig=280,16 Ref=360,100

| 峰 # | 保留时间 [min] | 类型 | 峰宽 [min] | 峰面积 [mAU*s] | 峰高 [mAU]  | 峰面积 %   |
|-----|------------|----|----------|-------------|-----------|---------|
| 1   | 69.371     | BB | 1.8197   | 2.00423e4   | 151.08502 | 97.5313 |
| 2   | 74.256     | BB | 1.0563   | 507.31357   | 5.74457   | 2.4687  |

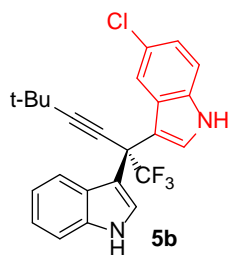

### HPLC spectrum of the racemate

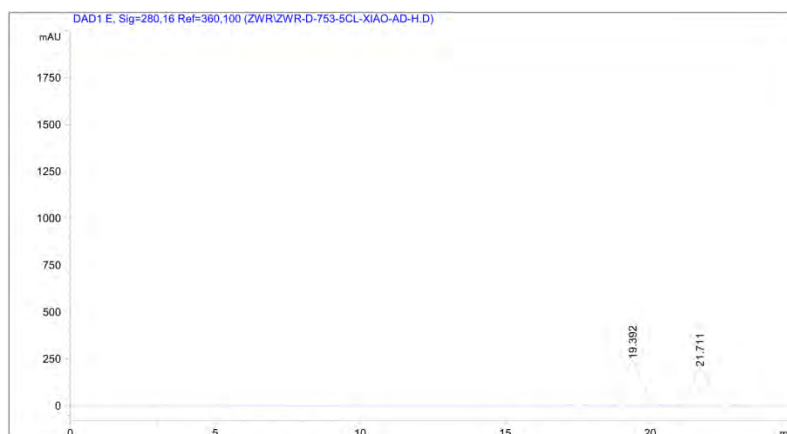

信号 1: DAD1 E, Sig=280,16 Ref=360,100

| 峰 # | 保留时间 [min] | 类型 | 峰宽 [min] | 峰面积 [mAU*s] | 峰高 [mAU]  | 峰面积 %   |
|-----|------------|----|----------|-------------|-----------|---------|
| 1   | 19.392     | BB | 0.6136   | 9205.79492  | 232.64905 | 50.0549 |
| 2   | 21.711     | BB | 0.7280   | 9185.60742  | 192.72838 | 49.9451 |

### HPLC spectrum of the enantioenriched compound

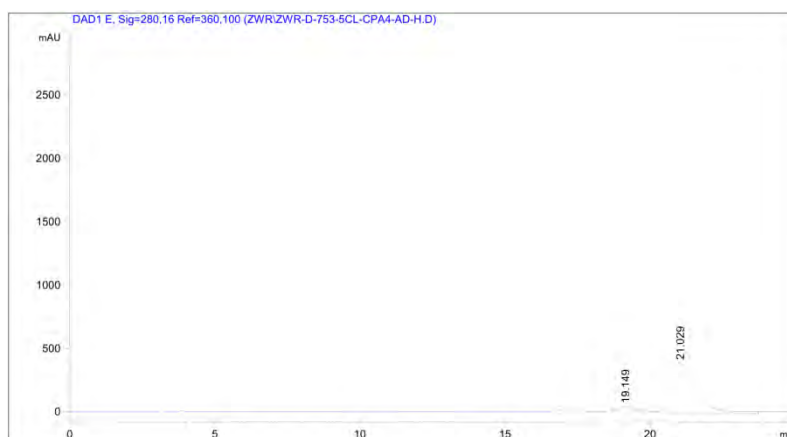

信号 1: DAD1 E, Sig=280,16 Ref=360,100

| 峰 # | 保留时间 [min] | 类型   | 峰宽 [min] | 峰面积 [mAU*s] | 峰高 [mAU]  | 峰面积 %   |
|-----|------------|------|----------|-------------|-----------|---------|
| 1   | 19.149     | MM R | 0.5345   | 1196.29089  | 37.30162  | 5.0842  |
| 2   | 21.029     | MM R | 0.9347   | 2.23333e4   | 398.20389 | 94.9158 |

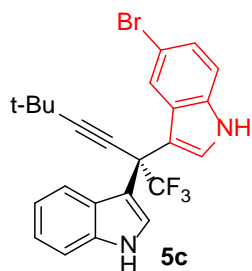

### HPLC spectrum of the racemate

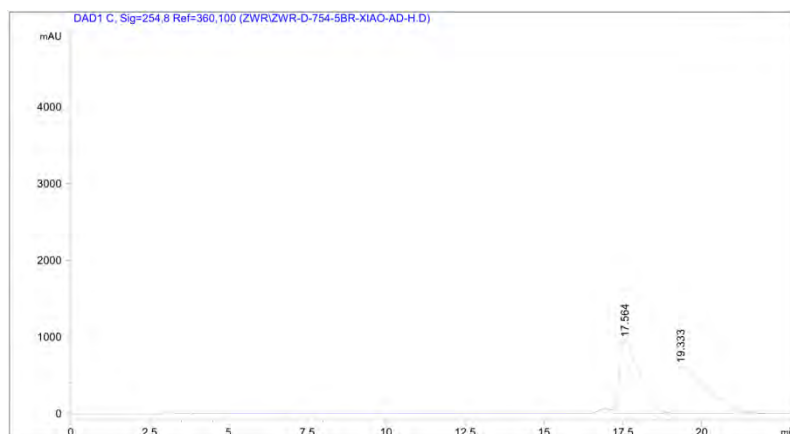

信号 1: DAD1 C, Sig=254,8 Ref=360,100

| 峰 # | 保留时间 [min] | 类型 | 峰宽 [min] | 峰面积 [mAU*s] | 峰高 [mAU]  | 峰面积 %   |
|-----|------------|----|----------|-------------|-----------|---------|
| 1   | 17.564     | VV | 0.6467   | 4.27012e4   | 960.38531 | 50.0541 |
| 2   | 19.333     | VB | 0.9502   | 4.26090e4   | 622.75806 | 49.9459 |

### HPLC spectrum of the enantioenriched compound

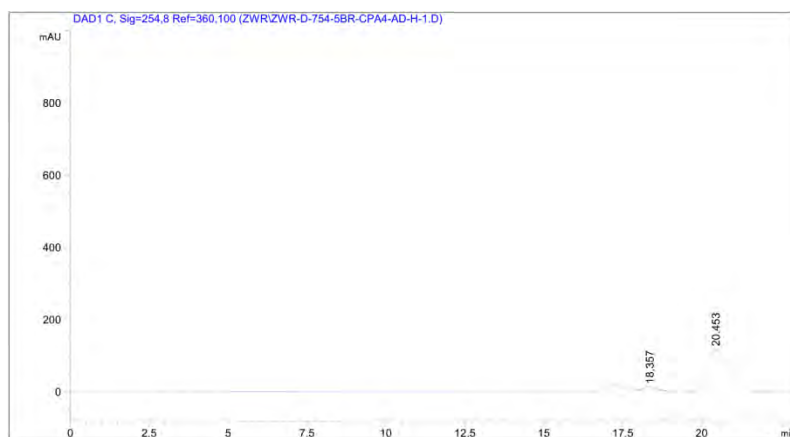

信号 1: DAD1 C, Sig=254,8 Ref=360,100

| 峰 # | 保留时间 [min] | 类型   | 峰宽 [min] | 峰面积 [mAU*s] | 峰高 [mAU]  | 峰面积 %   |
|-----|------------|------|----------|-------------|-----------|---------|
| 1   | 18.357     | MM R | 0.4792   | 287.12503   | 9.98713   | 4.5371  |
| 2   | 20.453     | MM R | 0.8268   | 6041.32617  | 121.78758 | 95.4629 |

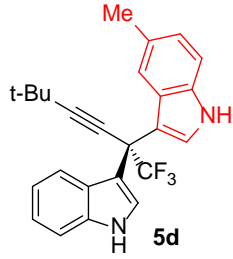

### HPLC spectrum of the racemate

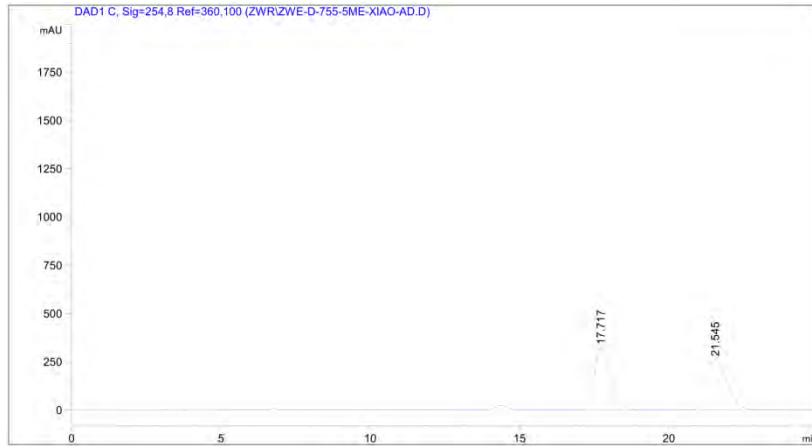

信号 1: DAD1 C, Sig=254,8 Ref=360,100

| 峰 # | 保留时间 [min] | 类型 | 峰宽 [min] | 峰面积 [mAU*s] | 峰高 [mAU]  | 峰面积 %   |
|-----|------------|----|----------|-------------|-----------|---------|
| 1   | 17.717     | BB | 0.5630   | 1.17946e4   | 323.74518 | 49.9744 |
| 2   | 21.545     | BB | 0.7002   | 1.18066e4   | 261.77628 | 50.0256 |

### HPLC spectrum of the enantioenriched compound

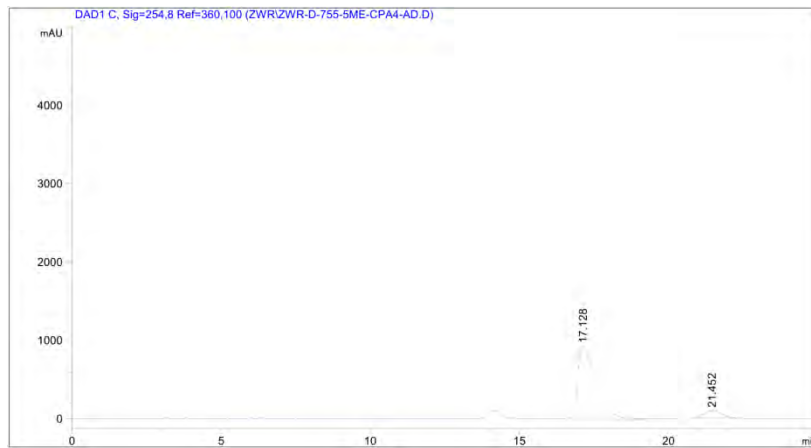

信号 1: DAD1 C, Sig=254,8 Ref=360,100

| 峰 # | 保留时间 [min] | 类型   | 峰宽 [min] | 峰面积 [mAU*s] | 峰高 [mAU]  | 峰面积 %   |
|-----|------------|------|----------|-------------|-----------|---------|
| 1   | 17.128     | MM R | 0.7292   | 4.11684e4   | 940.98553 | 92.1269 |
| 2   | 21.452     | MM R | 0.6343   | 3518.20825  | 92.44566  | 7.8731  |

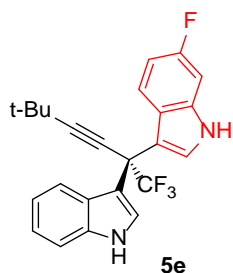

### HPLC spectrum of the racemate

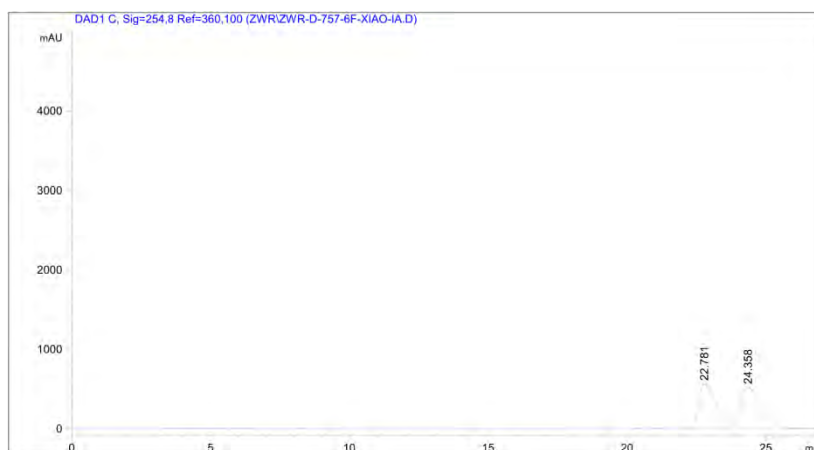

信号 1: DAD1 C, Sig=254,8 Ref=360,100

| 峰 # | 保留时间 [min] | 类型 | 峰宽 [min] | 峰面积 [mAU*s] | 峰高 [mAU]  | 峰面积 %   |
|-----|------------|----|----------|-------------|-----------|---------|
| 1   | 22.781     | BV | 0.6888   | 2.54999e4   | 564.77521 | 49.2983 |
| 2   | 24.358     | VB | 0.7514   | 2.62259e4   | 522.64429 | 50.7017 |

### HPLC spectrum of the enantioenriched compound

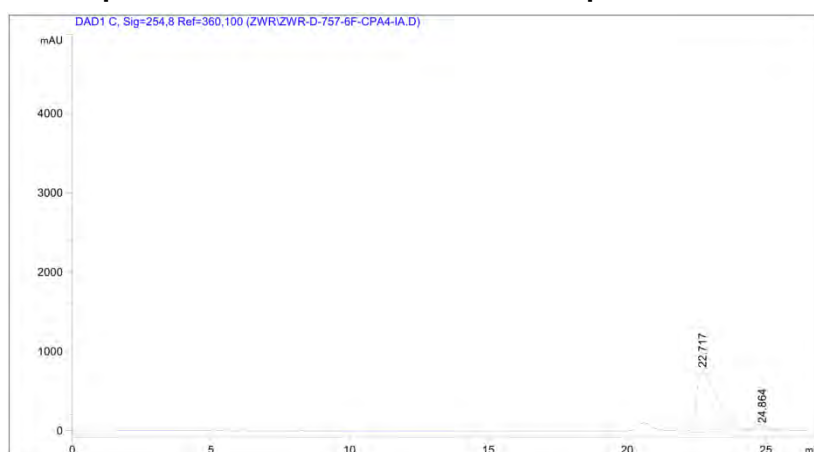

信号 1: DAD1 C, Sig=254,8 Ref=360,100

| 峰 # | 保留时间 [min] | 类型   | 峰宽 [min] | 峰面积 [mAU*s] | 峰高 [mAU]  | 峰面积 %   |
|-----|------------|------|----------|-------------|-----------|---------|
| 1   | 22.717     | MM R | 0.8824   | 4.08667e4   | 771.90985 | 96.8642 |
| 2   | 24.864     | MM R | 0.5956   | 1322.99756  | 37.02321  | 3.1358  |

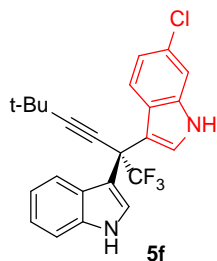

### HPLC spectrum of the racemate

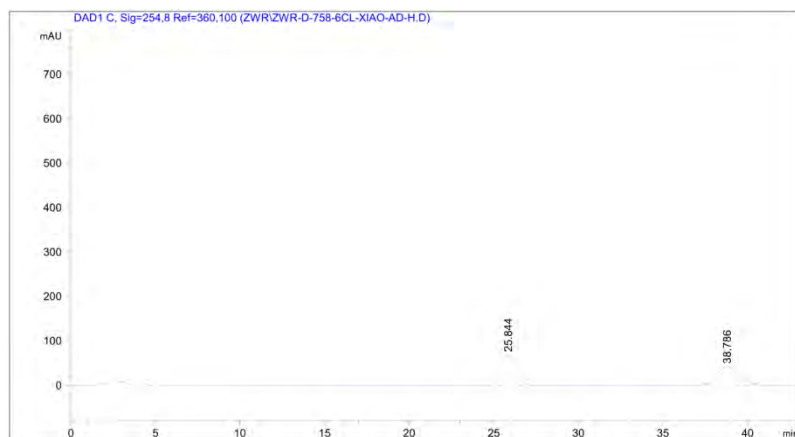

信号 1: DAD1 C, Sig=254,8 Ref=360,100

| 峰 # | 保留时间 [min] | 类型 | 峰宽 [min] | 峰面积 [mAU*s] | 峰高 [mAU] | 峰面积 %   |
|-----|------------|----|----------|-------------|----------|---------|
| 1   | 25.844     | BB | 0.8501   | 3739.45801  | 68.15457 | 50.3238 |
| 2   | 38.786     | BB | 1.2427   | 3691.33496  | 41.46002 | 49.6762 |

### HPLC spectrum of the enantioenriched compound

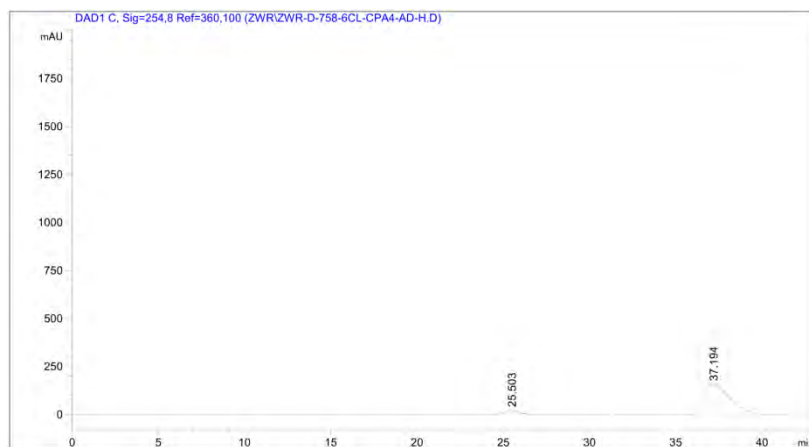

信号 1: DAD1 C, Sig=254,8 Ref=360,100

| 峰 # | 保留时间 [min] | 类型   | 峰宽 [min] | 峰面积 [mAU*s] | 峰高 [mAU]  | 峰面积 %   |
|-----|------------|------|----------|-------------|-----------|---------|
| 1   | 25.503     | MM R | 0.7652   | 874.64380   | 19.05029  | 4.8534  |
| 2   | 37.194     | MM R | 1.7298   | 1.71468e4   | 165.21155 | 95.1466 |

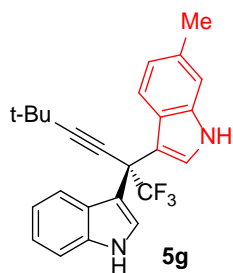

### HPLC spectrum of the racemate

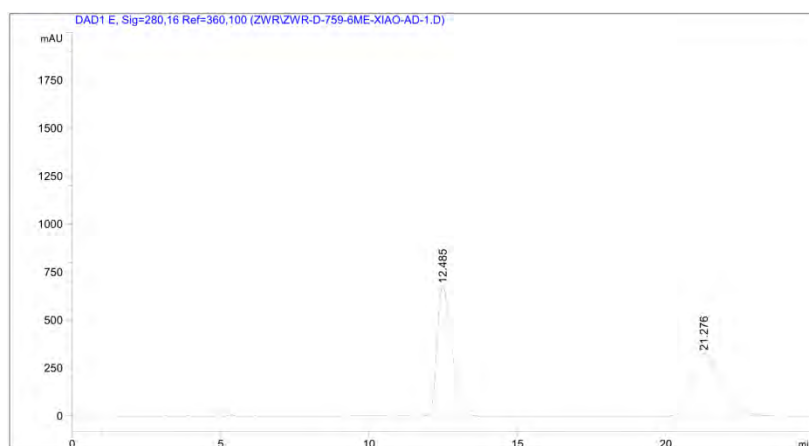

信号 1: DAD1 E, Sig=280,16 Ref=360,100

| 峰 # | 保留时间 [min] | 类型 | 峰宽 [min] | 峰面积 [mAU*s] | 峰高 [mAU]  | 峰面积 %   |
|-----|------------|----|----------|-------------|-----------|---------|
| 1   | 12.485     | BB | 0.5314   | 2.32841e4   | 676.66949 | 50.0602 |
| 2   | 21.276     | BB | 1.0611   | 2.32281e4   | 326.05228 | 49.9398 |

### HPLC spectrum of the enantioenriched compound

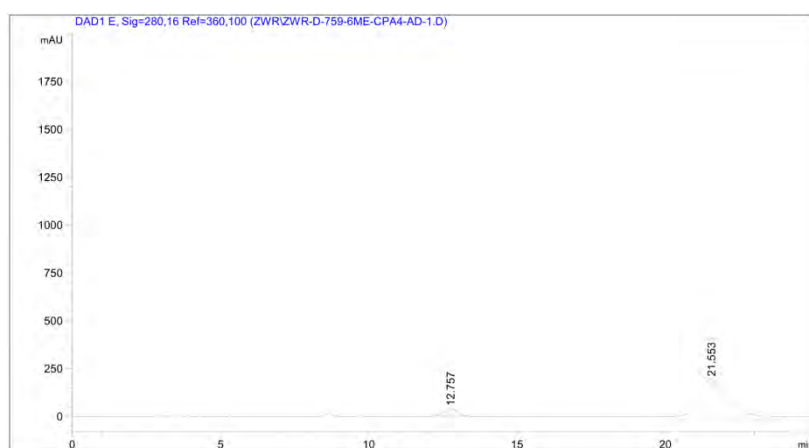

信号 1: DAD1 E, Sig=280,16 Ref=360,100

| 峰 # | 保留时间 [min] | 类型   | 峰宽 [min] | 峰面积 [mAU*s] | 峰高 [mAU]  | 峰面积 %   |
|-----|------------|------|----------|-------------|-----------|---------|
| 1   | 12.757     | MM R | 0.4746   | 1002.55341  | 35.20451  | 5.8720  |
| 2   | 21.553     | MM R | 1.3021   | 1.60709e4   | 205.71072 | 94.1280 |



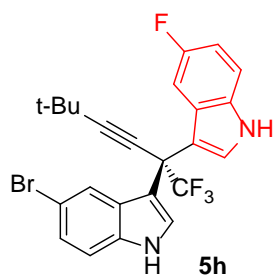

### HPLC spectrum of the racemate

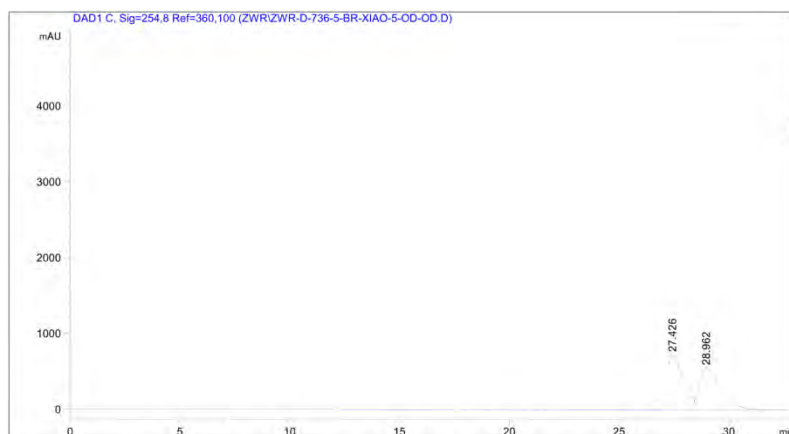

信号 1: DAD1 C, Sig=254,8 Ref=360,100

| 峰 # | 保留时间 [min] | 类型 | 峰宽 [min] | 峰面积 [mAU*s] | 峰高 [mAU]  | 峰面积 %   |
|-----|------------|----|----------|-------------|-----------|---------|
| 1   | 27.426     | BV | 0.7725   | 3.59413e4   | 724.80481 | 48.7998 |
| 2   | 28.962     | VB | 1.0134   | 3.77092e4   | 548.95789 | 51.2002 |

### HPLC spectrum of the enantioenriched compound

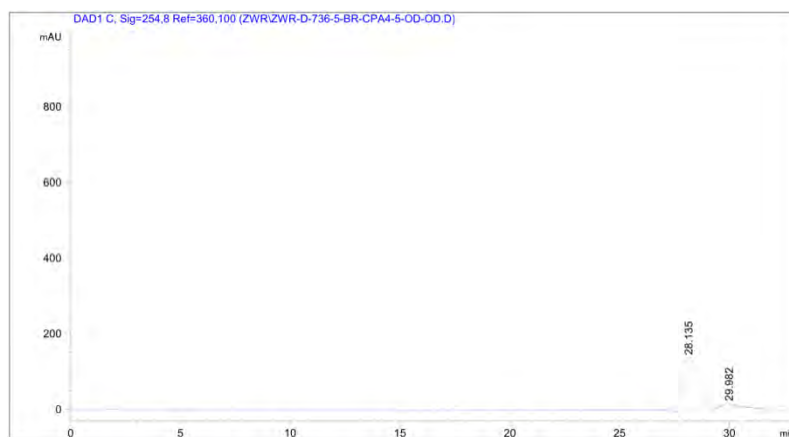

信号 1: DAD1 C, Sig=254,8 Ref=360,100

| 峰 # | 保留时间 [min] | 类型   | 峰宽 [min] | 峰面积 [mAU*s] | 峰高 [mAU]  | 峰面积 %   |
|-----|------------|------|----------|-------------|-----------|---------|
| 1   | 28.135     | MM R | 0.8728   | 7317.95752  | 139.74030 | 95.0507 |
| 2   | 29.982     | MM R | 0.7891   | 381.04843   | 8.04851   | 4.9493  |

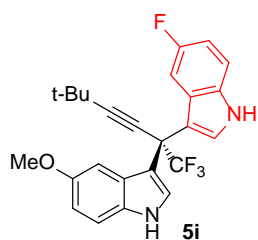

### HPLC spectrum of the racemate

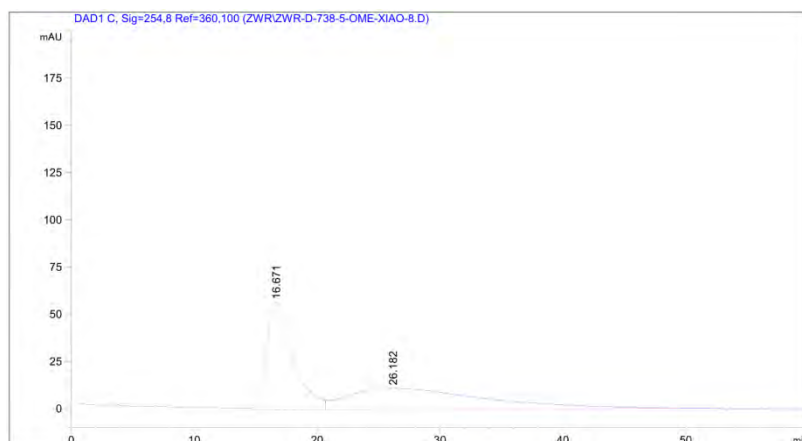

信号 1: DAD1 C, Sig=254,8 Ref=360,100

| 峰 # | 保留时间 [min] | 类型   | 峰宽 [min] | 峰面积 [mAU*s] | 峰高 [mAU] | 峰面积 %   |
|-----|------------|------|----------|-------------|----------|---------|
| 1   | 16.671     | MF R | 2.5462   | 8719.56152  | 57.07570 | 50.2560 |
| 2   | 26.182     | FM R | 12.7460  | 8630.71582  | 11.28549 | 49.7440 |

### HPLC spectrum of the enantioenriched compound

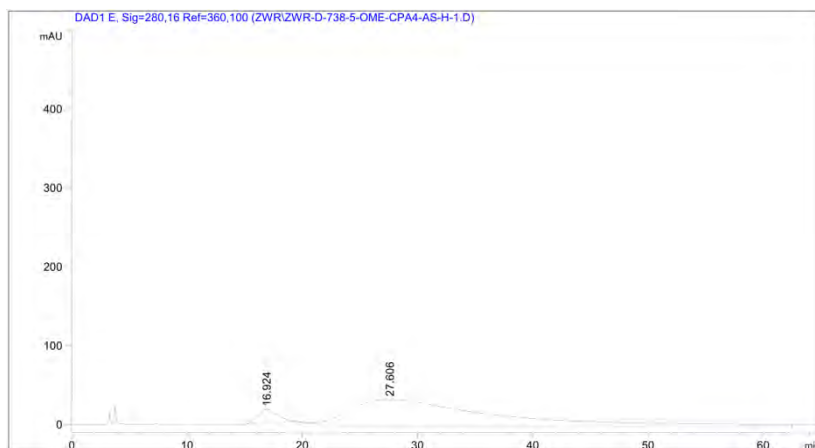

信号 1: DAD1 E, Sig=280,16 Ref=360,100

| 峰 # | 保留时间 [min] | 类型   | 峰宽 [min] | 峰面积 [mAU*s] | 峰高 [mAU] | 峰面积 %   |
|-----|------------|------|----------|-------------|----------|---------|
| 1   | 16.924     | MM R | 2.0027   | 2072.40088  | 17.24682 | 6.6889  |
| 2   | 27.606     | MM R | 14.3285  | 2.89102e4   | 33.62786 | 93.3111 |

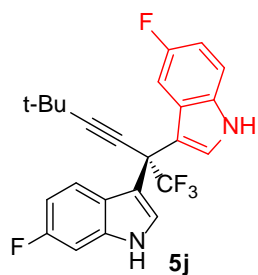

### HPLC spectrum of the racemate

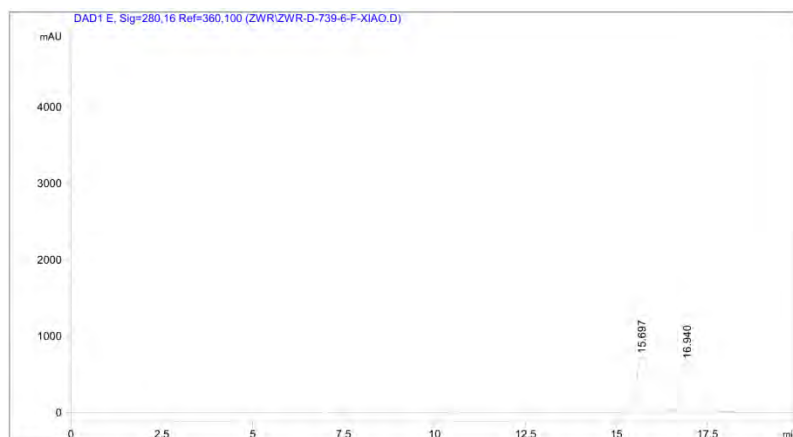

信号 1: DAD1 E, Sig=280,16 Ref=360,100

| 峰 # | 保留时间 [min] | 类型 | 峰宽 [min] | 峰面积 [mAU*s] | 峰高 [mAU]  | 峰面积 %   |
|-----|------------|----|----------|-------------|-----------|---------|
| 1   | 15.697     | BV | 0.4368   | 2.07434e4   | 731.50433 | 49.4176 |
| 2   | 16.940     | VB | 0.4895   | 2.12323e4   | 663.25885 | 50.5824 |

### HPLC spectrum of the enantioenriched compound

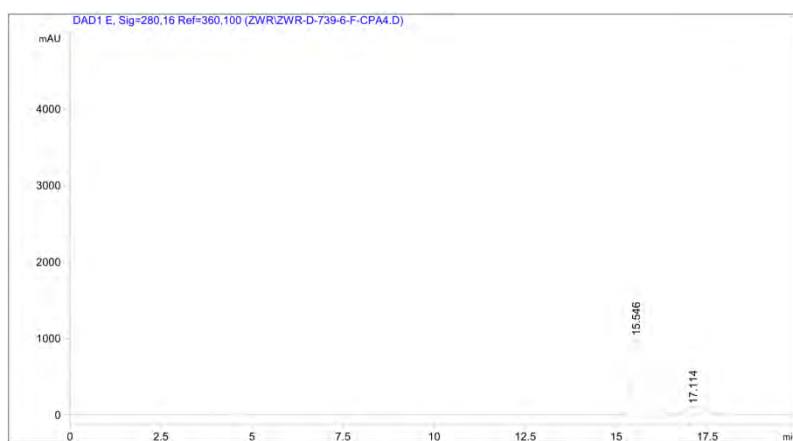

信号 1: DAD1 E, Sig=280,16 Ref=360,100

| 峰 # | 保留时间 [min] | 类型   | 峰宽 [min] | 峰面积 [mAU*s] | 峰高 [mAU]   | 峰面积 %   |
|-----|------------|------|----------|-------------|------------|---------|
| 1   | 15.546     | MM R | 0.5122   | 3.09652e4   | 1007.50232 | 90.0610 |
| 2   | 17.114     | MM R | 0.6343   | 3417.25757  | 89.78741   | 9.9390  |

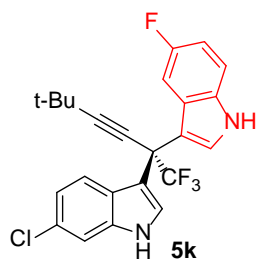

### HPLC spectrum of the racemate

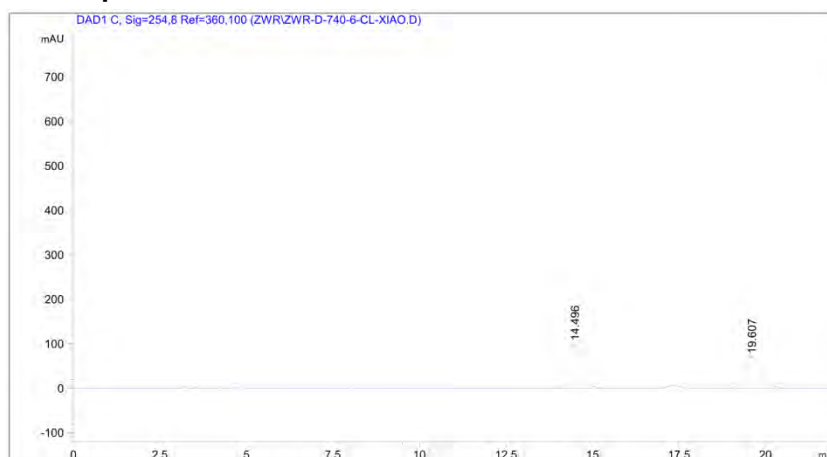

信号 1: DAD1 C, Sig=254,8 Ref=360,100

| 峰 # | 保留时间 [min] | 类型 | 峰宽 [min] | 峰面积 [mAU*s] | 峰高 [mAU]  | 峰面积 %   |
|-----|------------|----|----------|-------------|-----------|---------|
| 1   | 14.496     | BB | 0.3751   | 2434.25806  | 100.31750 | 50.1430 |
| 2   | 19.607     | BB | 0.5292   | 2420.37720  | 70.38205  | 49.8570 |

### HPLC spectrum of the enantioenriched compound

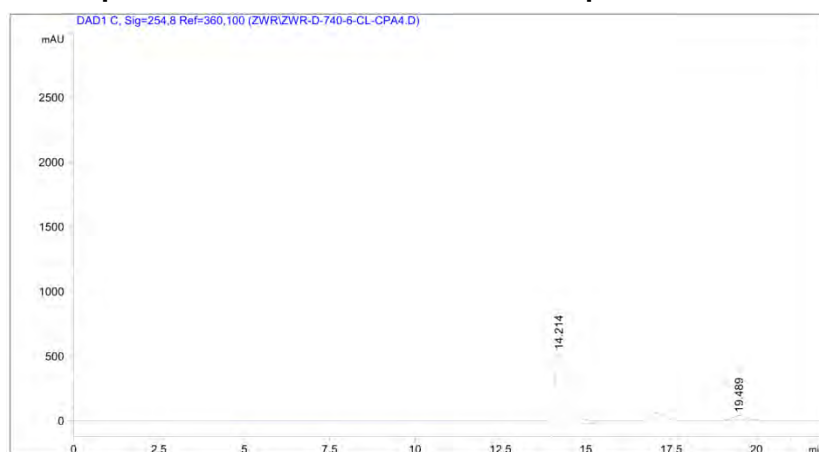

信号 1: DAD1 C, Sig=254,8 Ref=360,100

| 峰 # | 保留时间 [min] | 类型   | 峰宽 [min] | 峰面积 [mAU*s] | 峰高 [mAU]  | 峰面积 %   |
|-----|------------|------|----------|-------------|-----------|---------|
| 1   | 14.214     | MM R | 0.4650   | 1.52136e4   | 545.27246 | 94.0958 |
| 2   | 19.489     | MM R | 0.4544   | 954.59869   | 35.01619  | 5.9042  |

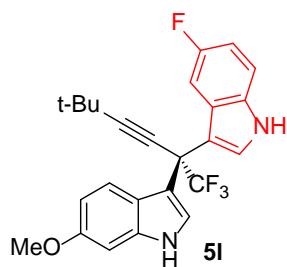

### HPLC spectrum of the racemate

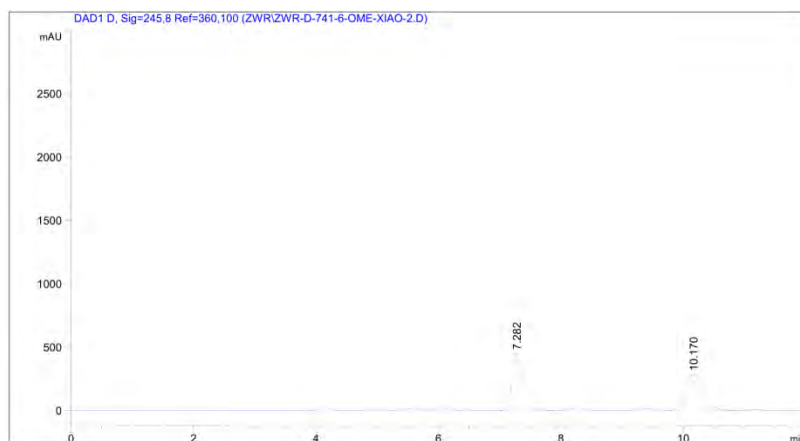

信号 1: DAD1 D, Sig=245,8 Ref=360,100

| 峰 # | 保留时间 [min] | 类型 | 峰宽 [min] | 峰面积 [mAU*s] | 峰高 [mAU]  | 峰面积 %   |
|-----|------------|----|----------|-------------|-----------|---------|
| 1   | 7.282      | BB | 0.1990   | 5908.49219  | 456.55756 | 50.5269 |
| 2   | 10.170     | VB | 0.3071   | 5785.26270  | 289.52731 | 49.4731 |

### HPLC spectrum of the enantioenriched compound

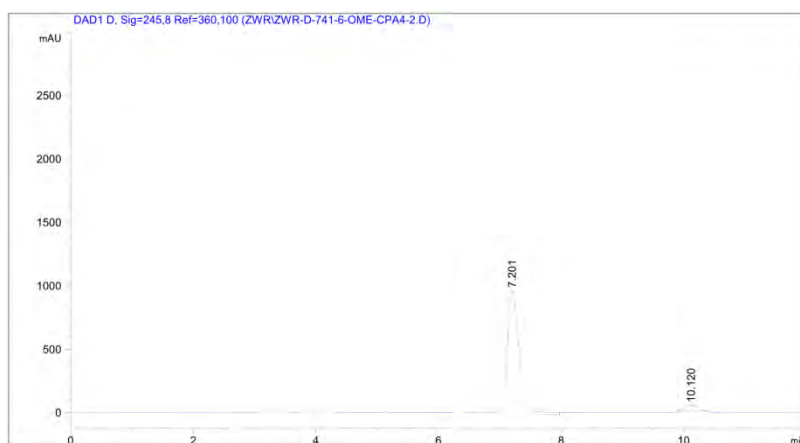

信号 1: DAD1 D, Sig=245,8 Ref=360,100

| 峰 # | 保留时间 [min] | 类型   | 峰宽 [min] | 峰面积 [mAU*s] | 峰高 [mAU]  | 峰面积 %   |
|-----|------------|------|----------|-------------|-----------|---------|
| 1   | 7.201      | MM R | 0.2240   | 1.31260e4   | 976.51343 | 95.1669 |
| 2   | 10.120     | MM R | 0.2440   | 666.61108   | 45.53490  | 4.8331  |

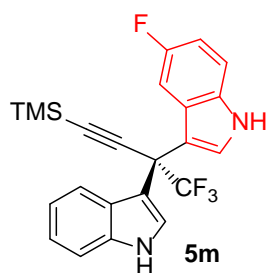

### HPLC spectrum of the racemate

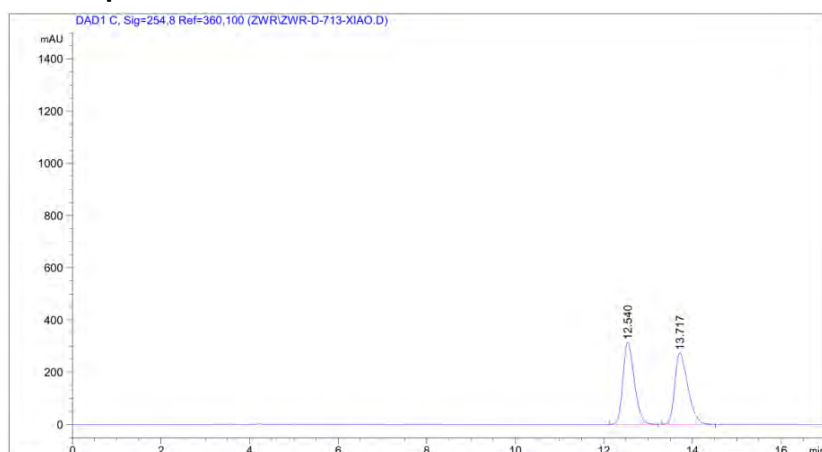

信号 1: DAD1 C, Sig=254,8 Ref=360,100

| 峰 # | 保留时间 [min] | 类型 | 峰宽 [min] | 峰面积 [mAU*s] | 峰高 [mAU]  | 峰面积 %   |
|-----|------------|----|----------|-------------|-----------|---------|
| 1   | 12.540     | BB | 0.2782   | 5634.81250  | 312.75342 | 49.9811 |
| 2   | 13.717     | BB | 0.3144   | 5639.08398  | 273.70560 | 50.0189 |

### HPLC spectrum of the enantioenriched compound

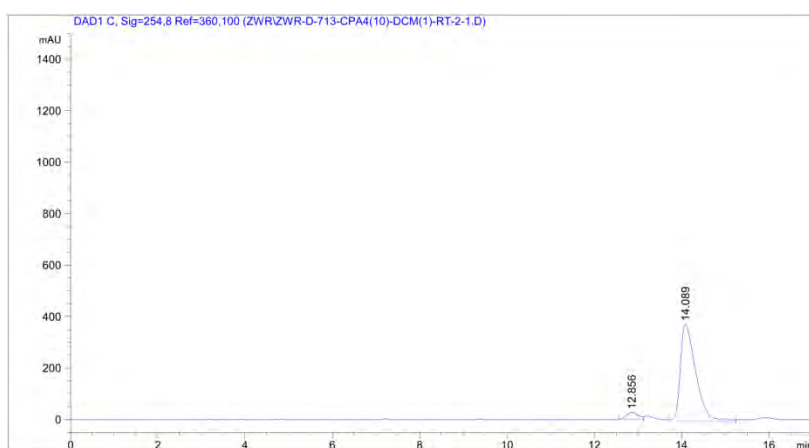

信号 1: DAD1 C, Sig=254,8 Ref=360,100

| 峰 # | 保留时间 [min] | 类型   | 峰宽 [min] | 峰面积 [mAU*s] | 峰高 [mAU]  | 峰面积 %   |
|-----|------------|------|----------|-------------|-----------|---------|
| 1   | 12.856     | MM R | 0.3008   | 495.39331   | 27.44513  | 5.0283  |
| 2   | 14.089     | MM R | 0.4112   | 9356.80469  | 379.24020 | 94.9717 |

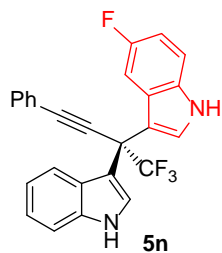

### HPLC spectrum of the racemate

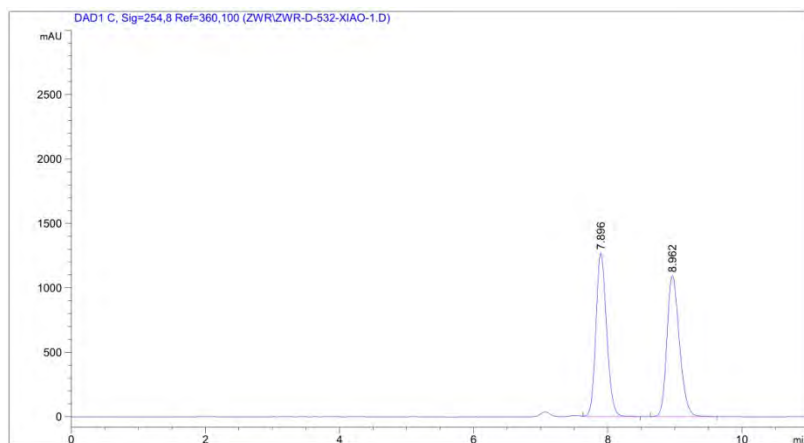

信号 1: DAD1 C, Sig=254,8 Ref=360,100

| 峰 # | 保留时间 [min] | 类型 | 峰宽 [min] | 峰面积 [mAU*s] | 峰高 [mAU]   | 峰面积 %   |
|-----|------------|----|----------|-------------|------------|---------|
| 1   | 7.896      | VB | 0.1716   | 1.41250e4   | 1271.89893 | 49.8876 |
| 2   | 8.962      | BB | 0.1989   | 1.41887e4   | 1096.93530 | 50.1124 |

### HPLC spectrum of the enantioenriched compound

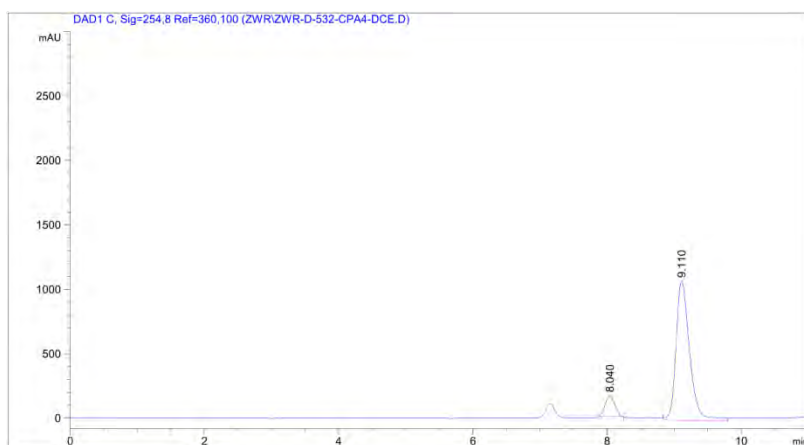

信号 1: DAD1 C, Sig=254,8 Ref=360,100

| 峰 # | 保留时间 [min] | 类型   | 峰宽 [min] | 峰面积 [mAU*s] | 峰高 [mAU]   | 峰面积 %   |
|-----|------------|------|----------|-------------|------------|---------|
| 1   | 8.040      | MM R | 0.1679   | 1670.43420  | 165.77184  | 9.8836  |
| 2   | 9.110      | MM R | 0.2349   | 1.52307e4   | 1080.60571 | 90.1164 |

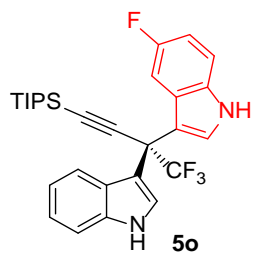

### HPLC spectrum of the racemate

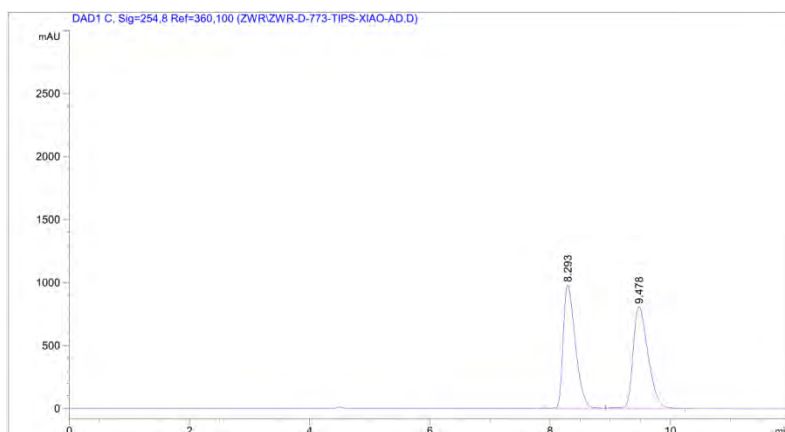

信号 1: DAD1 C, Sig=254,8 Ref=360,100

| 峰 # | 保留时间 [min] | 类型 | 峰宽 [min] | 峰面积 [mAU*s] | 峰高 [mAU]  | 峰面积 %   |
|-----|------------|----|----------|-------------|-----------|---------|
| 1   | 8.293      | BB | 0.2158   | 1.37367e4   | 978.59198 | 49.6689 |
| 2   | 9.478      | BB | 0.2674   | 1.39198e4   | 806.24133 | 50.3311 |

### HPLC spectrum of the enantioenriched compound

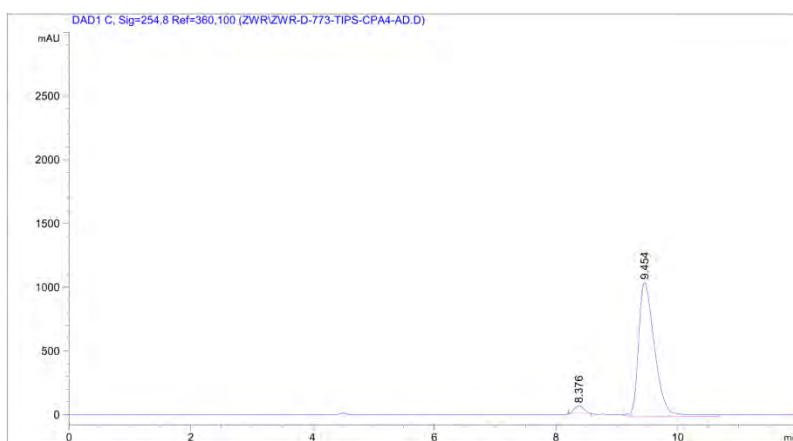

信号 1: DAD1 C, Sig=254,8 Ref=360,100

| 峰 # | 保留时间 [min] | 类型   | 峰宽 [min] | 峰面积 [mAU*s] | 峰高 [mAU]   | 峰面积 %   |
|-----|------------|------|----------|-------------|------------|---------|
| 1   | 8.376      | MM R | 0.1800   | 617.25037   | 57.14081   | 3.0891  |
| 2   | 9.454      | MM R | 0.3081   | 1.93645e4   | 1047.35828 | 96.9109 |



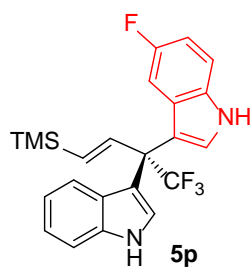

### HPLC spectrum of the racemate

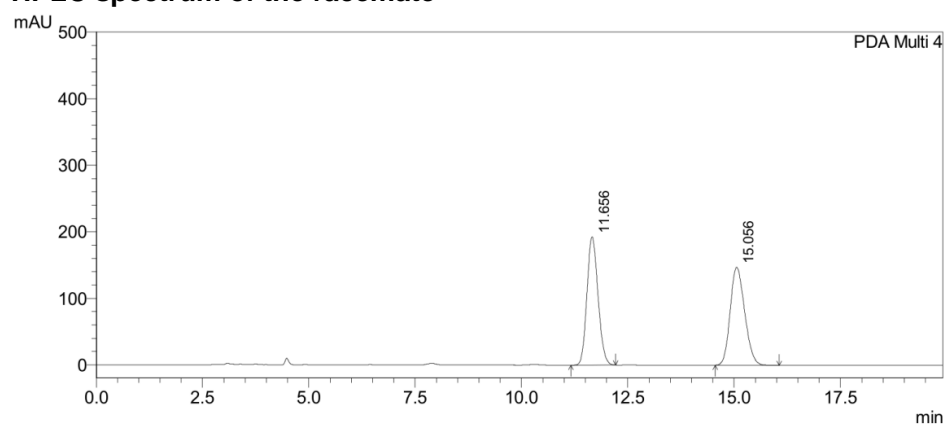

PeakTable

PDA Ch4 254nm 4nm

| Peak# | Ret. Time | Area    | Height | Area %  | Height % |
|-------|-----------|---------|--------|---------|----------|
| 1     | 11.656    | 3499833 | 192932 | 50.061  | 56.705   |
| 2     | 15.056    | 3491281 | 147308 | 49.939  | 43.295   |
| Total |           | 6991113 | 340240 | 100.000 | 100.000  |

### HPLC spectrum of the enantioenriched compound

D:\ZWR\ZWR-D-774-CPA4-AD.lcd

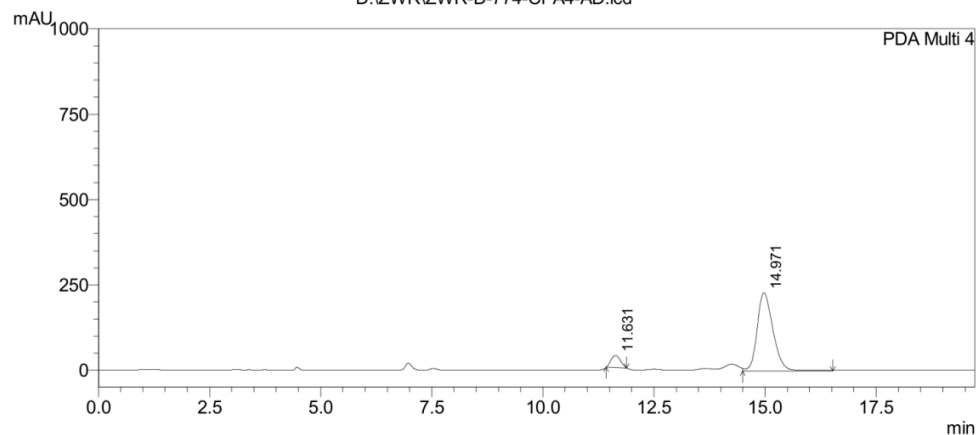

PeakTable

PDA Ch4 254nm 4nm

| Peak# | Ret. Time | Area    | Height | Area %  | Height % |
|-------|-----------|---------|--------|---------|----------|
| 1     | 11.631    | 521145  | 35468  | 8.194   | 13.372   |
| 2     | 14.971    | 5839162 | 229776 | 91.806  | 86.628   |
| Total |           | 6360307 | 265245 | 100.000 | 100.000  |

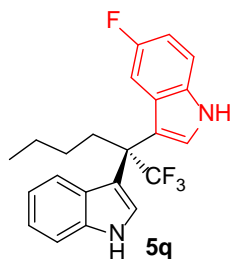

### HPLC spectrum of the racemate

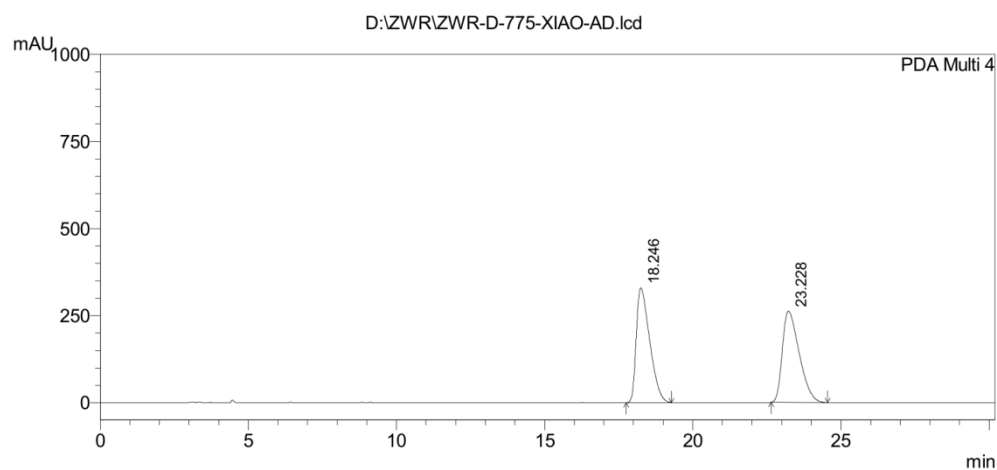

PeakTable

PDA Ch4 254nm 4nm

| Peak# | Ret. Time | Area     | Height | Area %  | Height % |
|-------|-----------|----------|--------|---------|----------|
| 1     | 18.246    | 10380421 | 329331 | 50.009  | 55.672   |
| 2     | 23.228    | 10376697 | 262230 | 49.991  | 44.328   |
| Total |           | 20757118 | 591561 | 100.000 | 100.000  |

### HPLC spectrum of the enantioenriched compound

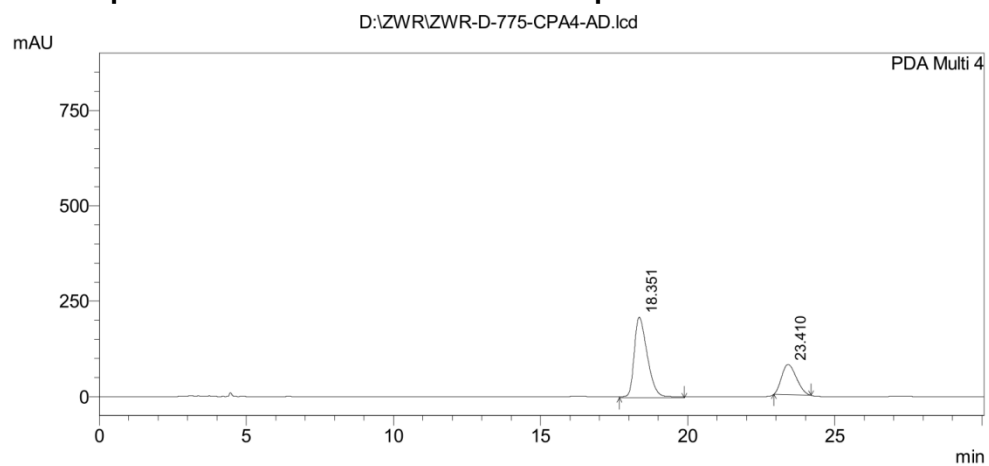

PeakTable

PDA Ch4 254nm 4nm

| Peak# | Ret. Time | Area    | Height | Area %  | Height % |
|-------|-----------|---------|--------|---------|----------|
| 1     | 18.351    | 6599685 | 210378 | 70.568  | 72.696   |
| 2     | 23.410    | 2752503 | 79015  | 29.432  | 27.304   |
| Total |           | 9352188 | 289393 | 100.000 | 100.000  |

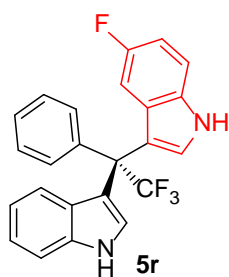

### HPLC spectrum of the racemate

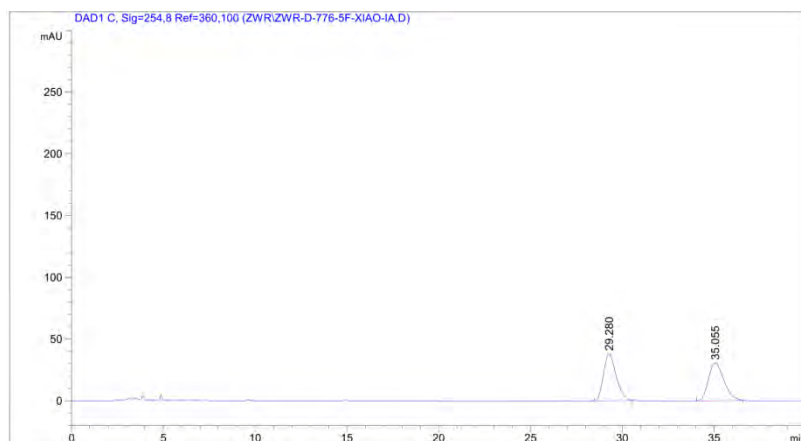

信号 1: DAD1 C, Sig=254,8 Ref=360,100

| 峰 # | 保留时间 [min] | 类型 | 峰宽 [min] | 峰面积 [mAU*s] | 峰高 [mAU] | 峰面积 %   |
|-----|------------|----|----------|-------------|----------|---------|
| 1   | 29.280     | BB | 0.7310   | 1819.77759  | 37.98116 | 50.1628 |
| 2   | 35.055     | BB | 0.8748   | 1807.96509  | 30.71234 | 49.8372 |

### HPLC spectrum of the enantioenriched compound

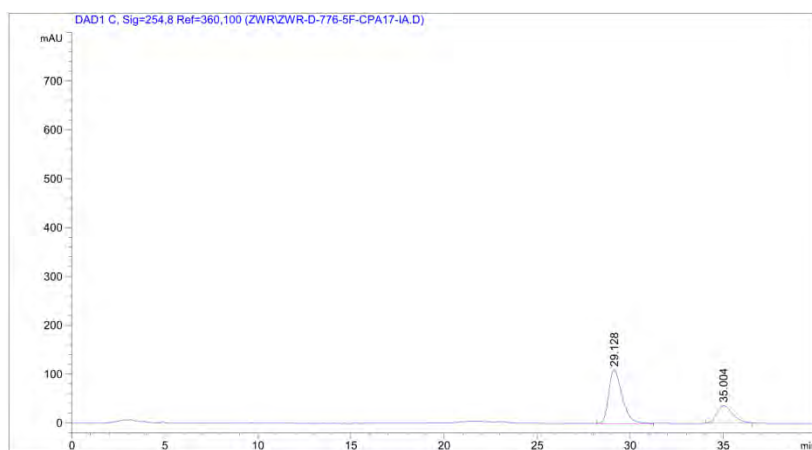

信号 1: DAD1 C, Sig=254,8 Ref=360,100

| 峰 # | 保留时间 [min] | 类型   | 峰宽 [min] | 峰面积 [mAU*s] | 峰高 [mAU]  | 峰面积 %   |
|-----|------------|------|----------|-------------|-----------|---------|
| 1   | 29.128     | MM R | 0.8552   | 5692.75244  | 110.94628 | 73.0597 |
| 2   | 35.004     | BB   | 0.8880   | 2099.16333  | 35.80414  | 26.9403 |

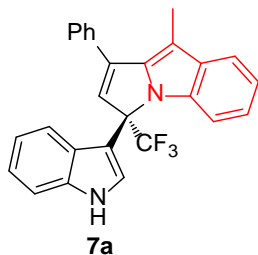

### HPLC spectrum of the racemate

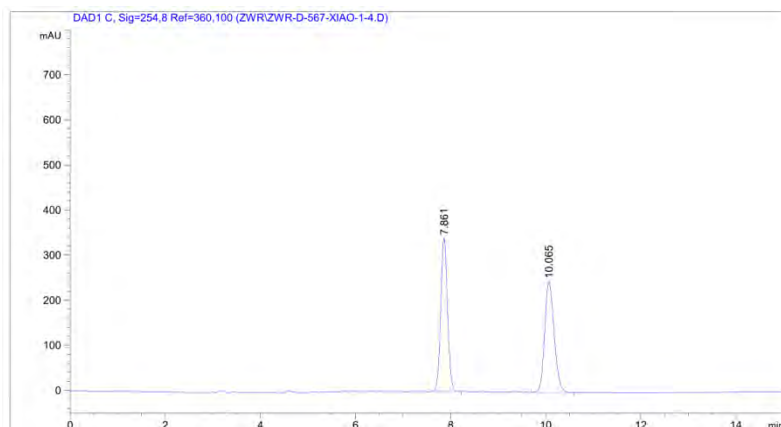

信号 1: DAD1 C, Sig=254,8 Ref=360,100

| 峰 # | 保留时间 [min] | 类型 | 峰宽 [min] | 峰面积 [mAU*s] | 峰高 [mAU]  | 峰面积 %   |
|-----|------------|----|----------|-------------|-----------|---------|
| 1   | 7.861      | BB | 0.1511   | 3368.35962  | 341.42029 | 49.8229 |
| 2   | 10.065     | VB | 0.2124   | 3392.30640  | 246.73032 | 50.1771 |

### HPLC spectrum of the enantioenriched compound

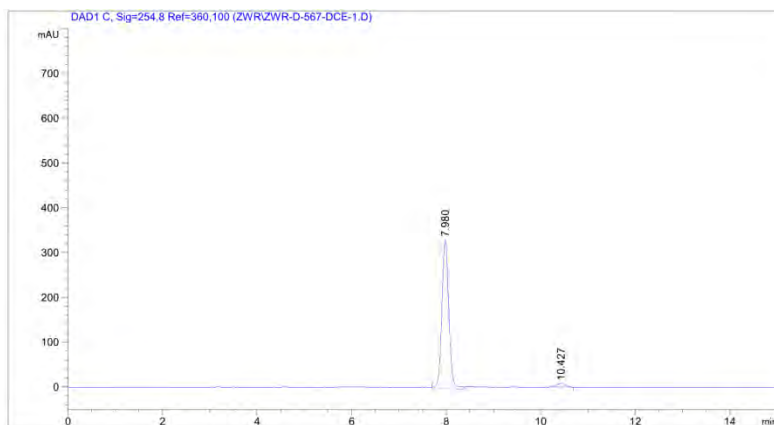

信号 1: DAD1 C, Sig=254,8 Ref=360,100

| 峰 # | 保留时间 [min] | 类型   | 峰宽 [min] | 峰面积 [mAU*s] | 峰高 [mAU]  | 峰面积 %   |
|-----|------------|------|----------|-------------|-----------|---------|
| 1   | 7.980      | MM R | 0.1708   | 3419.72339  | 333.60574 | 97.2579 |
| 2   | 10.427     | MM R | 0.1989   | 96.41719    | 8.07974   | 2.7421  |

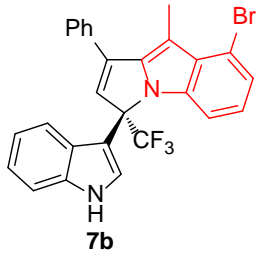

### HPLC spectrum of the racemate

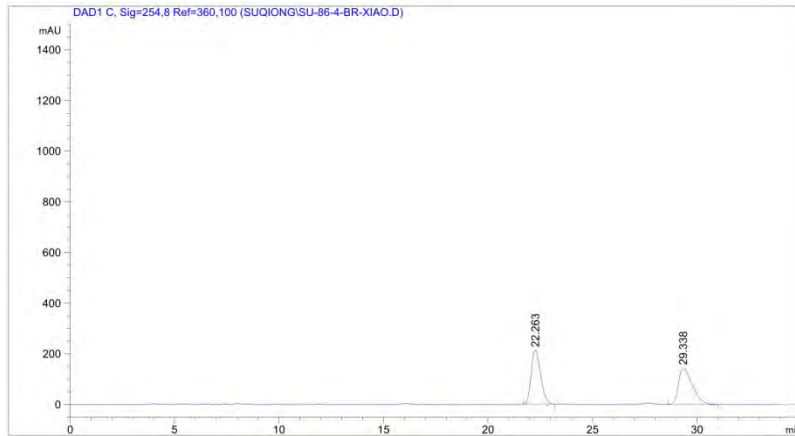

信号 1: DAD1 C, Sig=254,8 Ref=360,100

| 峰 # | 保留时间 [min] | 类型   | 峰宽 [min] | 峰面积 [mAU*s] | 峰高 [mAU]  | 峰面积 %   |
|-----|------------|------|----------|-------------|-----------|---------|
| 1   | 22.263     | MM R | 0.5236   | 6708.44092  | 213.51553 | 49.9653 |
| 2   | 29.338     | MM R | 0.7751   | 6717.75146  | 144.45026 | 50.0347 |

### HPLC spectrum of the enantioenriched compound

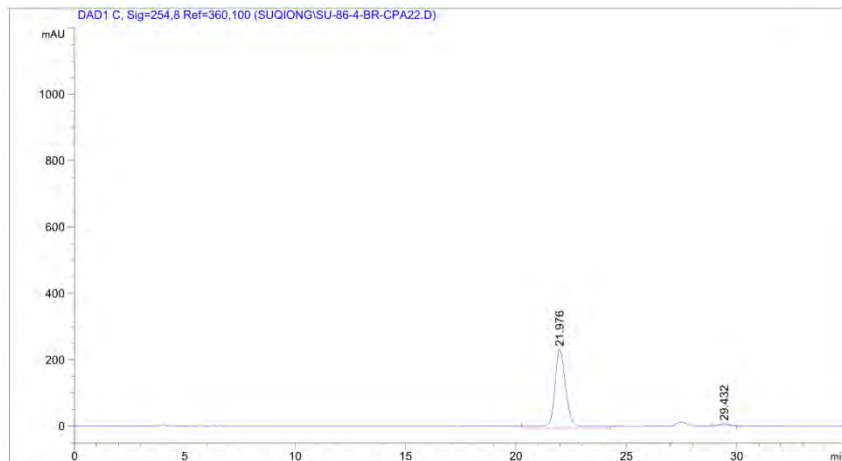

信号 1: DAD1 C, Sig=254,8 Ref=360,100

| 峰 # | 保留时间 [min] | 类型   | 峰宽 [min] | 峰面积 [mAU*s] | 峰高 [mAU]  | 峰面积 %   |
|-----|------------|------|----------|-------------|-----------|---------|
| 1   | 21.976     | MM R | 0.6249   | 8888.22754  | 237.04106 | 98.0625 |
| 2   | 29.432     | MM R | 0.5393   | 175.61171   | 5.42762   | 1.9375  |

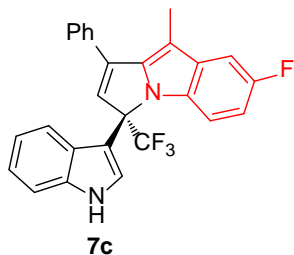

### HPLC spectrum of the racemate

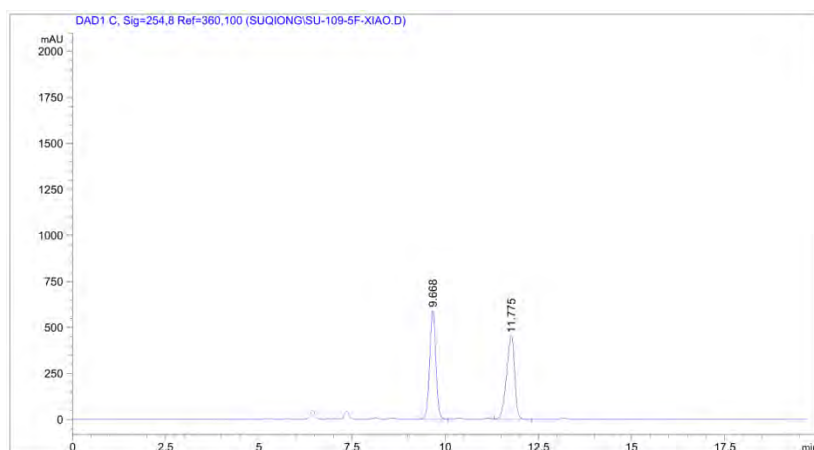

信号 1: DAD1 C, Sig=254,8 Ref=360,100

| 峰 # | 保留时间 [min] | 类型 | 峰宽 [min] | 峰面积 [mAU*s] | 峰高 [mAU]  | 峰面积 %   |
|-----|------------|----|----------|-------------|-----------|---------|
| 1   | 9.668      | BB | 0.1790   | 6840.48730  | 590.99158 | 49.9140 |
| 2   | 11.775     | VB | 0.2349   | 6864.05273  | 452.61148 | 50.0860 |

### HPLC spectrum of the enantioenriched compound

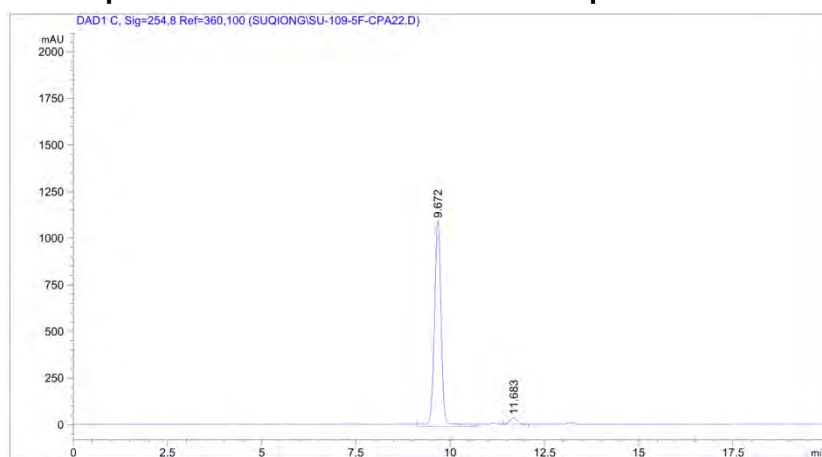

信号 1: DAD1 C, Sig=254,8 Ref=360,100

| 峰 # | 保留时间 [min] | 类型   | 峰宽 [min] | 峰面积 [mAU*s] | 峰高 [mAU]   | 峰面积 %   |
|-----|------------|------|----------|-------------|------------|---------|
| 1   | 9.672      | MM R | 0.2112   | 1.39536e4   | 1100.90735 | 96.5435 |
| 2   | 11.683     | MM R | 0.2381   | 499.57040   | 34.96687   | 3.4565  |

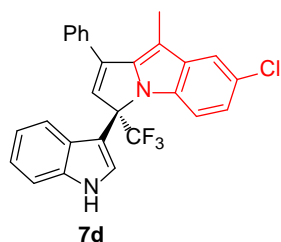

### HPLC spectrum of the racemate

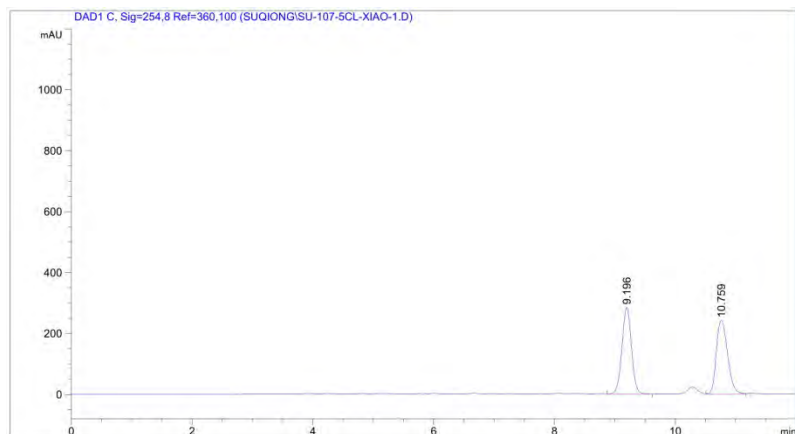

信号 1: DAD1 C, Sig=254,8 Ref=360,100

| 峰 # | 保留时间 [min] | 类型 | 峰宽 [min] | 峰面积 [mAU*s] | 峰高 [mAU]  | 峰面积 %   |
|-----|------------|----|----------|-------------|-----------|---------|
| 1   | 9.196      | VB | 0.1700   | 3123.61694  | 284.64114 | 49.8267 |
| 2   | 10.759     | VV | 0.2056   | 3145.34399  | 241.99323 | 50.1733 |

### HPLC spectrum of the enantioenriched compound

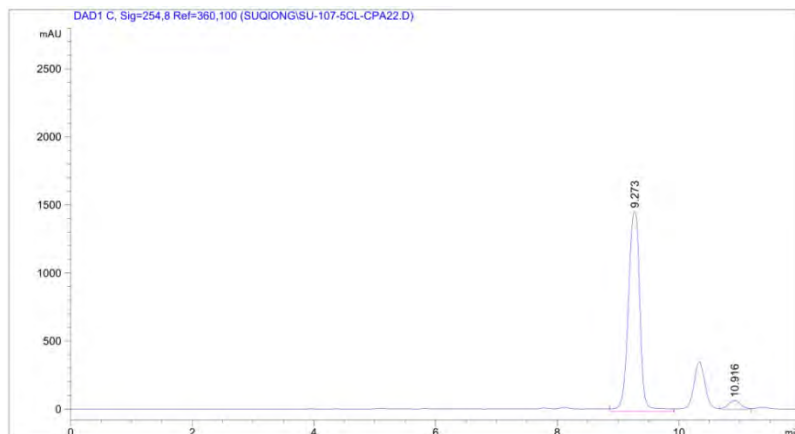

信号 1: DAD1 C, Sig=254,8 Ref=360,100

| 峰 # | 保留时间 [min] | 类型   | 峰宽 [min] | 峰面积 [mAU*s] | 峰高 [mAU]   | 峰面积 %   |
|-----|------------|------|----------|-------------|------------|---------|
| 1   | 9.273      | MM R | 0.2203   | 1.94401e4   | 1471.01868 | 95.7264 |
| 2   | 10.916     | MM R | 0.2309   | 867.87915   | 62.63172   | 4.2736  |

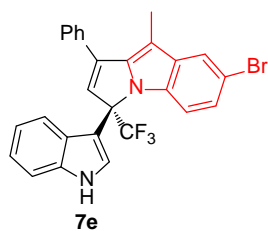

### HPLC spectrum of the racemate

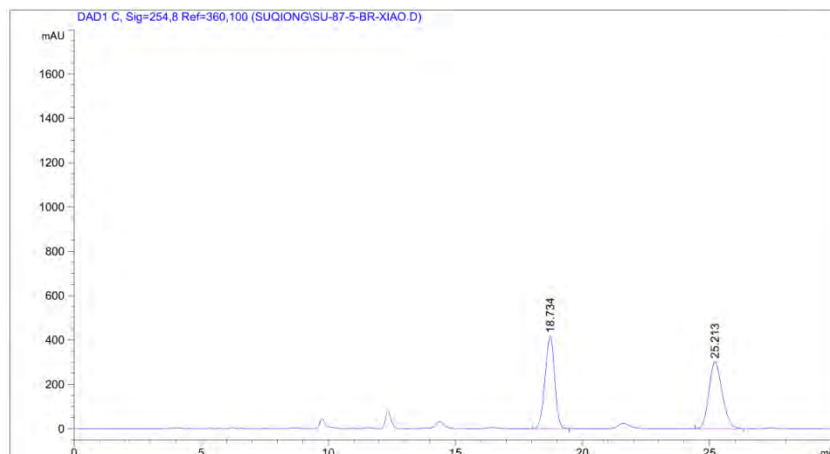

信号 1: DAD1 C, Sig=254,8 Ref=360,100

| 峰 # | 保留时间 [min] | 类型 | 峰宽 [min] | 峰面积 [mAU*s] | 峰高 [mAU]  | 峰面积 %   |
|-----|------------|----|----------|-------------|-----------|---------|
| 1   | 18.734     | BB | 0.4084   | 1.09563e4   | 417.12576 | 50.0378 |
| 2   | 25.213     | BB | 0.5593   | 1.09397e4   | 301.49286 | 49.9622 |

### HPLC spectrum of the enantioenriched compound

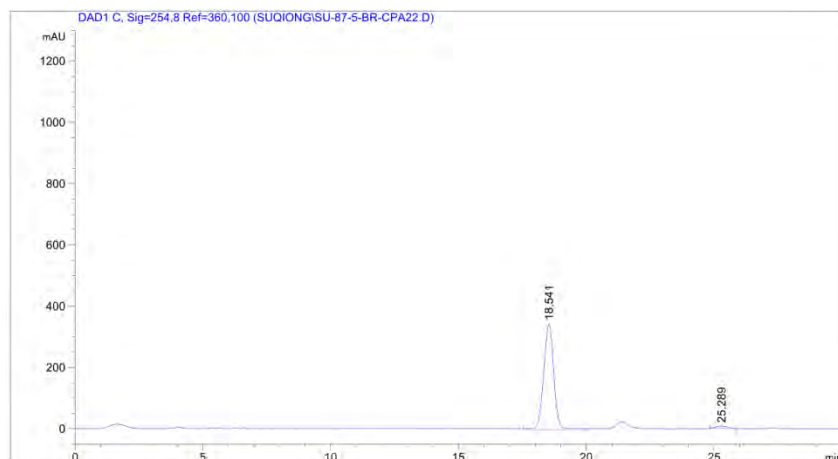

信号 1: DAD1 C, Sig=254,8 Ref=360,100

| 峰 # | 保留时间 [min] | 类型   | 峰宽 [min] | 峰面积 [mAU*s] | 峰高 [mAU]  | 峰面积 %   |
|-----|------------|------|----------|-------------|-----------|---------|
| 1   | 18.541     | MM R | 0.4636   | 9653.19043  | 347.06992 | 97.5499 |
| 2   | 25.289     | MM R | 0.5103   | 242.45728   | 7.91820   | 2.4501  |



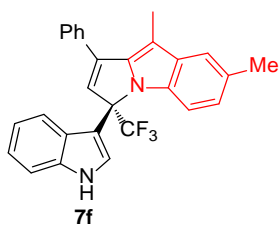

### HPLC spectrum of the racemate

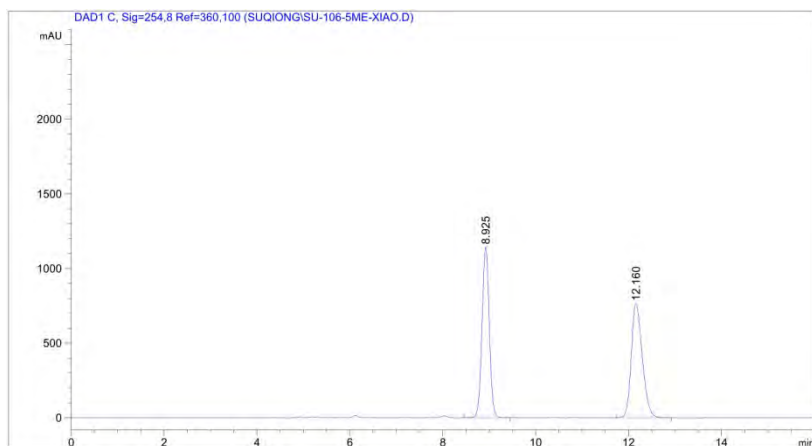

信号 1: DAD1 C, Sig=254,8 Ref=360,100

| 峰 # | 保留时间 [min] | 类型 | 峰宽 [min] | 峰面积 [mAU*s] | 峰高 [mAU]   | 峰面积 %   |
|-----|------------|----|----------|-------------|------------|---------|
| 1   | 8.925      | BB | 0.1684   | 1.23632e4   | 1141.51733 | 49.5964 |
| 2   | 12.160     | BB | 0.2519   | 1.25644e4   | 763.75726  | 50.4036 |

### HPLC spectrum of the enantioenriched compound

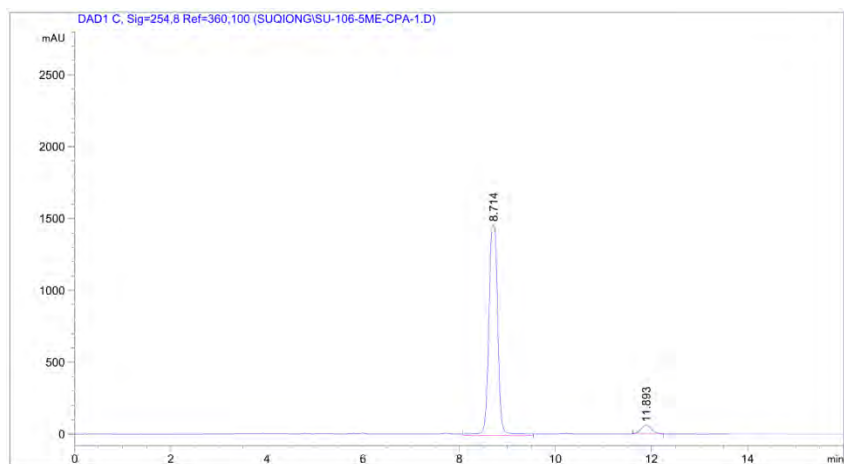

信号 1: DAD1 C, Sig=254,8 Ref=360,100

| 峰 # | 保留时间 [min] | 类型   | 峰宽 [min] | 峰面积 [mAU*s] | 峰高 [mAU]   | 峰面积 %   |
|-----|------------|------|----------|-------------|------------|---------|
| 1   | 8.714      | MM R | 0.2160   | 1.90075e4   | 1466.49719 | 96.0709 |
| 2   | 11.893     | MM R | 0.2306   | 777.35632   | 56.19270   | 3.9291  |

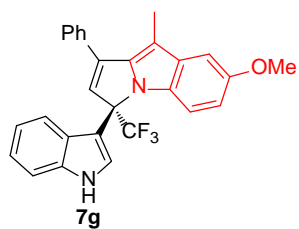

### HPLC spectrum of the racemate

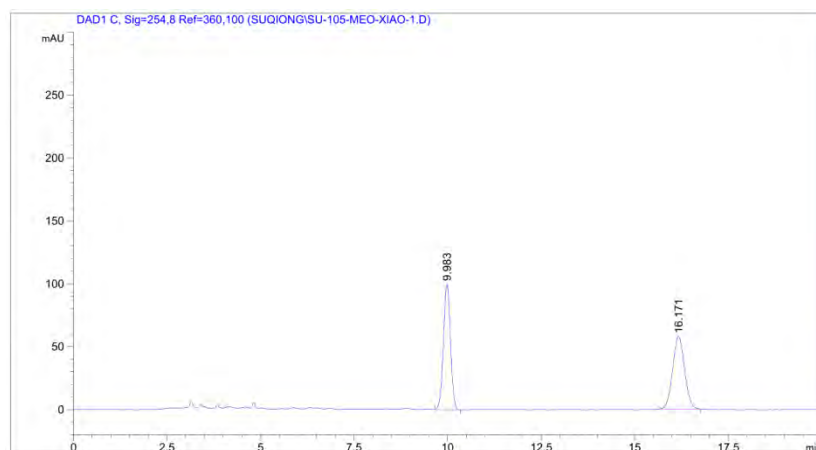

信号 1: DAD1 C, Sig=254,8 Ref=360,100

| 峰 # | 保留时间 [min] | 类型 | 峰宽 [min] | 峰面积 [mAU*s] | 峰高 [mAU] | 峰面积 %   |
|-----|------------|----|----------|-------------|----------|---------|
| 1   | 9.983      | BB | 0.2022   | 1302.39331  | 99.81444 | 50.2003 |
| 2   | 16.171     | BB | 0.3445   | 1292.00232  | 57.87285 | 49.7997 |

### HPLC spectrum of the enantioenriched compound

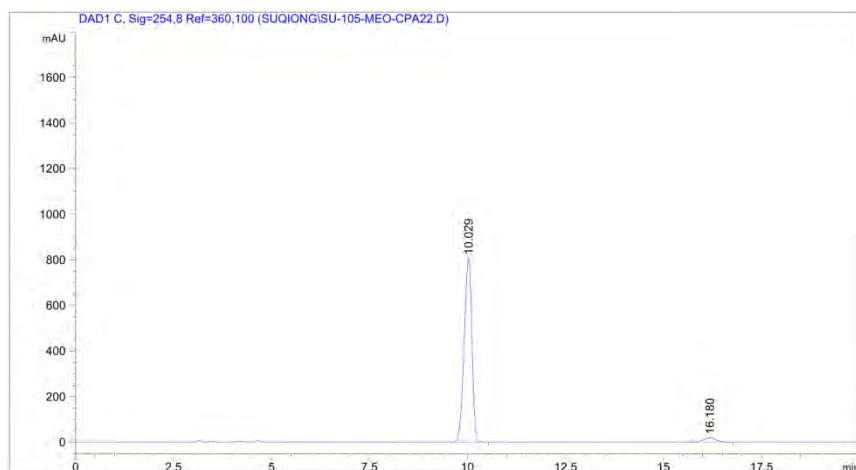

信号 1: DAD1 C, Sig=254,8 Ref=360,100

| 峰 # | 保留时间 [min] | 类型 | 峰宽 [min] | 峰面积 [mAU*s] | 峰高 [mAU]  | 峰面积 %   |
|-----|------------|----|----------|-------------|-----------|---------|
| 1   | 10.029     | BB | 0.2163   | 1.10931e4   | 807.19537 | 96.1558 |
| 2   | 16.180     | BB | 0.3480   | 443.48257   | 19.90032  | 3.8442  |

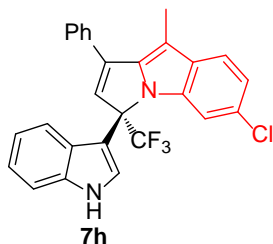

### HPLC spectrum of the racemate

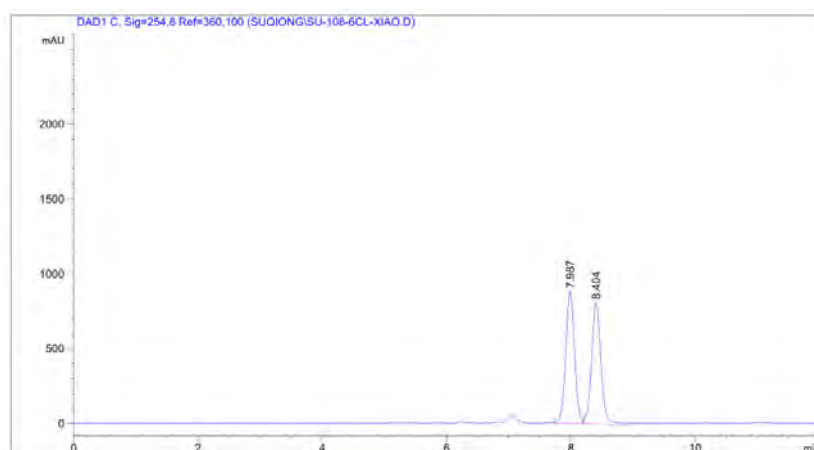

信号 1: DAD1 C, Sig=254,8 Ref=360,100

| 峰 # | 保留时间 [min] | 类型   | 峰宽 [min] | 峰面积 [mAU*s] | 峰高 [mAU]  | 峰面积 %   |
|-----|------------|------|----------|-------------|-----------|---------|
| 1   | 7.987      | MM R | 0.1638   | 8659.54883  | 881.22839 | 50.2208 |
| 2   | 8.404      | MM R | 0.1764   | 8583.41504  | 811.00763 | 49.7792 |

### HPLC spectrum of the enantioenriched compound

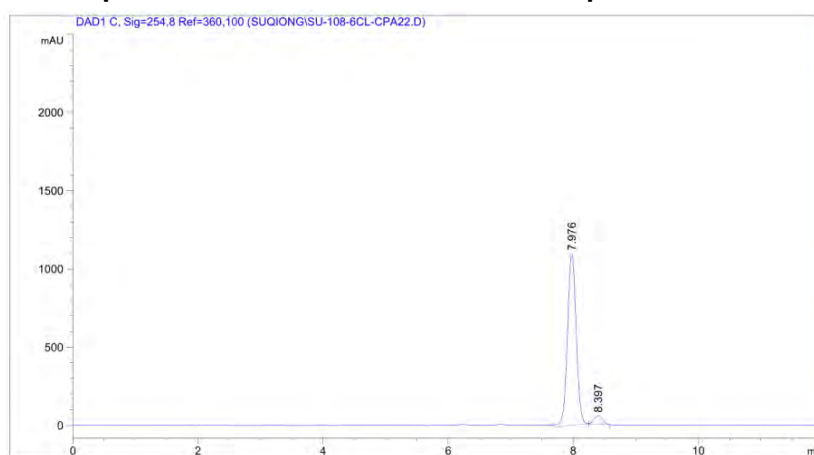

信号 1: DAD1 C, Sig=254,8 Ref=360,100

| 峰 # | 保留时间 [min] | 类型   | 峰宽 [min] | 峰面积 [mAU*s] | 峰高 [mAU]   | 峰面积 %   |
|-----|------------|------|----------|-------------|------------|---------|
| 1   | 7.976      | MM R | 0.1612   | 1.06268e4   | 1098.55286 | 95.5836 |
| 2   | 8.397      | MM R | 0.1482   | 491.01080   | 55.22508   | 4.4164  |

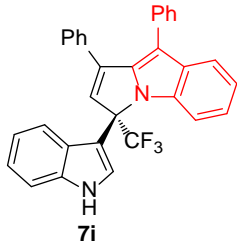

### HPLC spectrum of the racemate

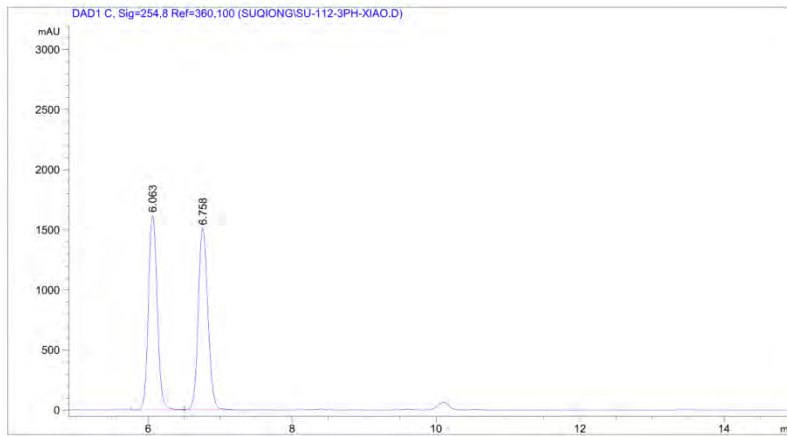

信号 1: DAD1 C, Sig=254,8 Ref=360,100

| 峰 # | 保留时间 [min] | 类型 | 峰宽 [min] | 峰面积 [mAU*s] | 峰高 [mAU]   | 峰面积 %   |
|-----|------------|----|----------|-------------|------------|---------|
| 1   | 6.063      | VV | 0.1338   | 1.38553e4   | 1619.56653 | 49.4557 |
| 2   | 6.758      | VB | 0.1451   | 1.41603e4   | 1513.67639 | 50.5443 |

### HPLC spectrum of the enantioenriched compound

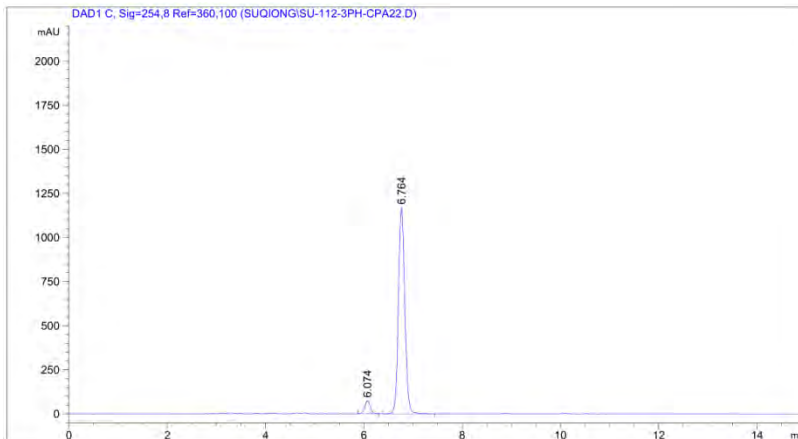

信号 1: DAD1 C, Sig=254,8 Ref=360,100

| 峰 # | 保留时间 [min] | 类型   | 峰宽 [min] | 峰面积 [mAU*s] | 峰高 [mAU]   | 峰面积 %   |
|-----|------------|------|----------|-------------|------------|---------|
| 1   | 6.074      | MM R | 0.1315   | 578.20782   | 73.27765   | 5.2133  |
| 2   | 6.764      | MM R | 0.1499   | 1.05128e4   | 1169.24731 | 94.7867 |

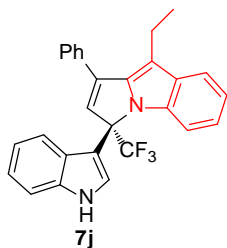

### HPLC spectrum of the racemate

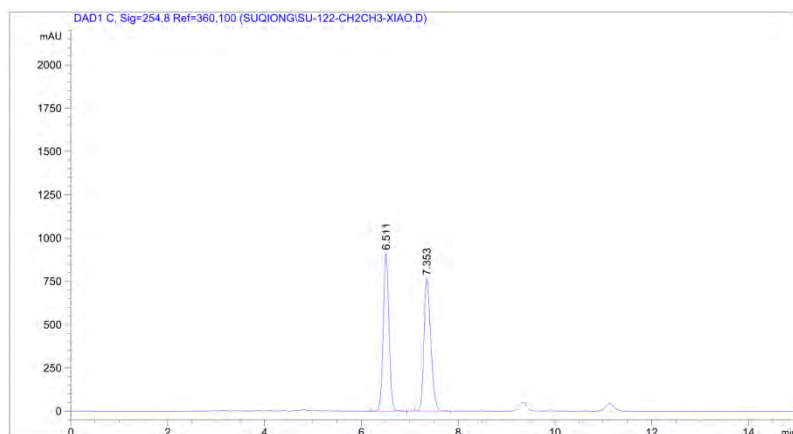

信号 1: DAD1 C, Sig=254,8 Ref=360,100

| 峰 # | 保留时间 [min] | 类型 | 峰宽 [min] | 峰面积 [mAU*s] | 峰高 [mAU]  | 峰面积 %   |
|-----|------------|----|----------|-------------|-----------|---------|
| 1   | 6.511      | BB | 0.1264   | 7539.24854  | 912.57300 | 49.9699 |
| 2   | 7.353      | BB | 0.1488   | 7548.32178  | 767.39862 | 50.0301 |

### HPLC spectrum of the enantioenriched compound

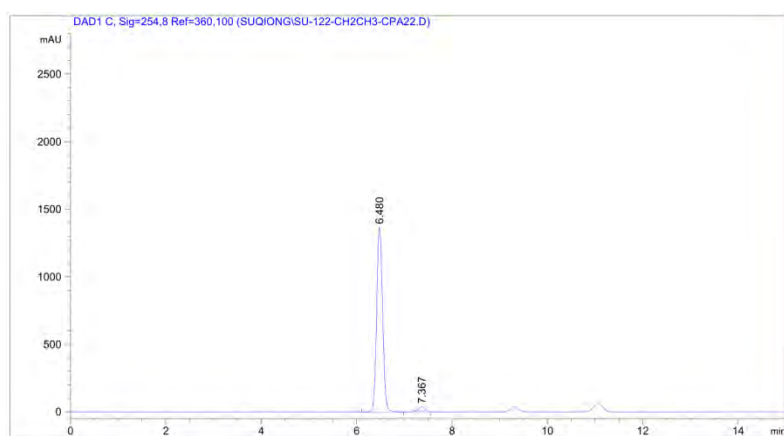

信号 1: DAD1 C, Sig=254,8 Ref=360,100

| 峰 # | 保留时间 [min] | 类型   | 峰宽 [min] | 峰面积 [mAU*s] | 峰高 [mAU]   | 峰面积 %   |
|-----|------------|------|----------|-------------|------------|---------|
| 1   | 6.480      | MM R | 0.1455   | 1.19841e4   | 1372.34778 | 96.9103 |
| 2   | 7.367      | MM R | 0.1603   | 382.07492   | 39.72918   | 3.0897  |

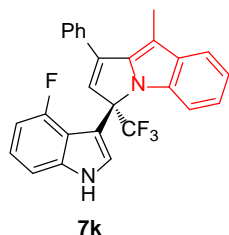

### HPLC spectrum of the racemate

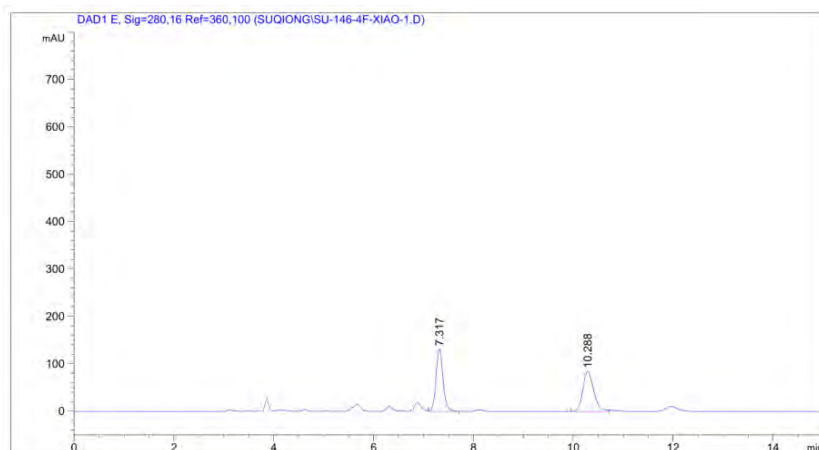

信号 1: DAD1 E, Sig=280,16 Ref=360,100

| 峰 # | 保留时间 [min] | 类型 | 峰宽 [min] | 峰面积 [mAU*s] | 峰高 [mAU]  | 峰面积 %   |
|-----|------------|----|----------|-------------|-----------|---------|
| 1   | 7.317      | VB | 0.1504   | 1290.82654  | 131.58401 | 50.4072 |
| 2   | 10.288     | BB | 0.2312   | 1269.97363  | 84.54660  | 49.5928 |

### HPLC spectrum of the enantioenriched compound

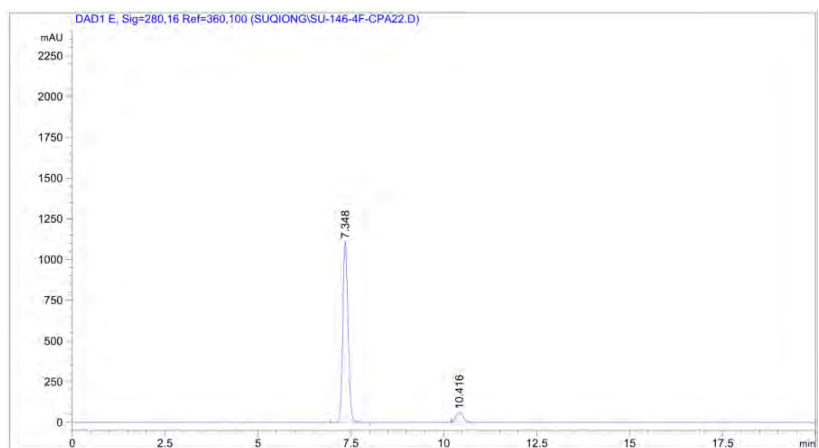

信号 1: DAD1 E, Sig=280,16 Ref=360,100

| 峰 # | 保留时间 [min] | 类型   | 峰宽 [min] | 峰面积 [mAU*s] | 峰高 [mAU]   | 峰面积 %   |
|-----|------------|------|----------|-------------|------------|---------|
| 1   | 7.348      | MM R | 0.1631   | 1.08670e4   | 1110.23657 | 92.4132 |
| 2   | 10.416     | MM R | 0.2337   | 892.13715   | 63.61239   | 7.5868  |

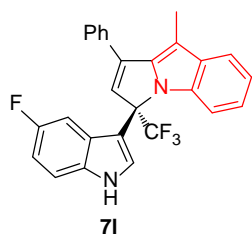

### HPLC spectrum of the racemate

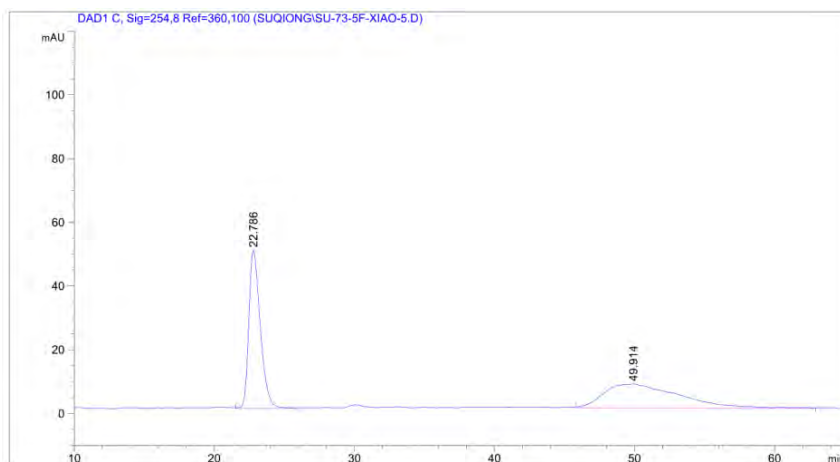

信号 1: DAD1 C, Sig=254,8 Ref=360,100

| 峰 # | 保留时间 [min] | 类型   | 峰宽 [min] | 峰面积 [mAU*s] | 峰高 [mAU] | 峰面积 %   |
|-----|------------|------|----------|-------------|----------|---------|
| 1   | 22.786     | MM R | 0.9540   | 2839.83716  | 49.61415 | 49.8914 |
| 2   | 49.914     | MM R | 6.3448   | 2852.20581  | 7.49229  | 50.1086 |

### HPLC spectrum of the enantioenriched compound

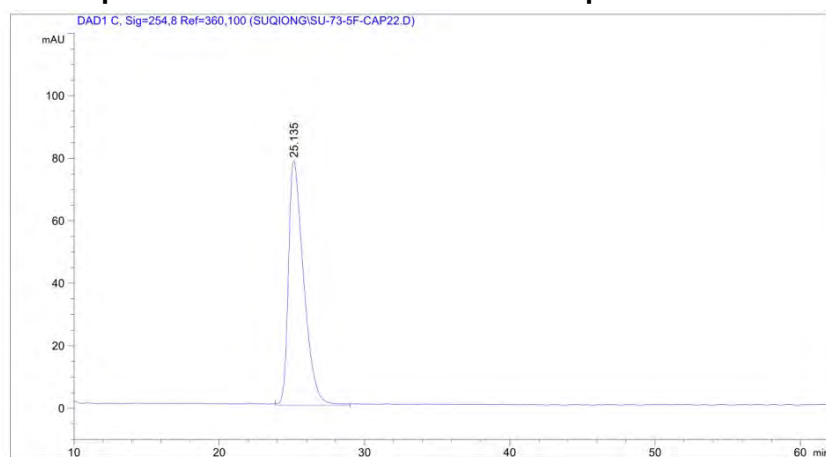

信号 1: DAD1 C, Sig=254,8 Ref=360,100

| 峰 # | 保留时间 [min] | 类型   | 峰宽 [min] | 峰面积 [mAU*s] | 峰高 [mAU] | 峰面积 %    |
|-----|------------|------|----------|-------------|----------|----------|
| 1   | 25.135     | MM R | 1.2129   | 5697.25537  | 78.28860 | 100.0000 |

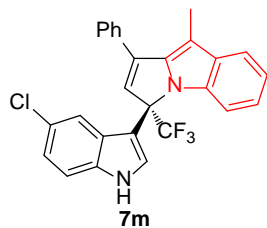

### HPLC spectrum of the racemate

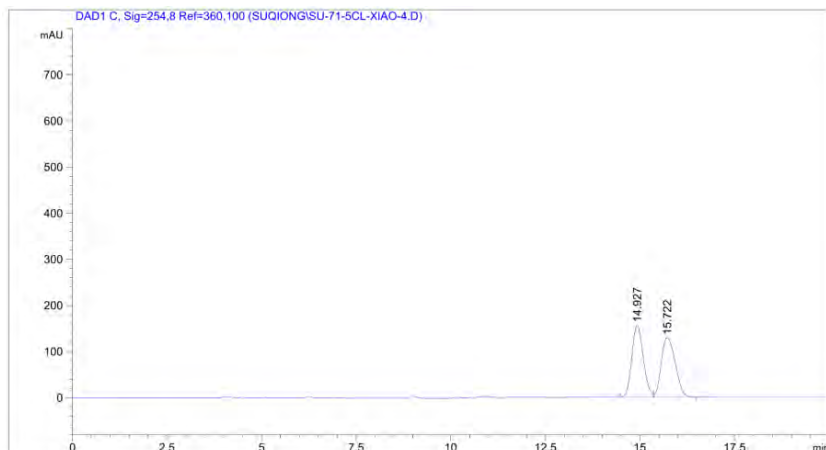

信号 1: DAD1 C, Sig=254,8 Ref=360,100

| 峰 # | 保留时间 [min] | 类型   | 峰宽 [min] | 峰面积 [mAU*s] | 峰高 [mAU]  | 峰面积 %   |
|-----|------------|------|----------|-------------|-----------|---------|
| 1   | 14.927     | BV   | 0.3271   | 3263.37598  | 155.33867 | 49.7113 |
| 2   | 15.722     | VB R | 0.4160   | 3301.27832  | 128.39563 | 50.2887 |

### HPLC spectrum of the enantioenriched compound

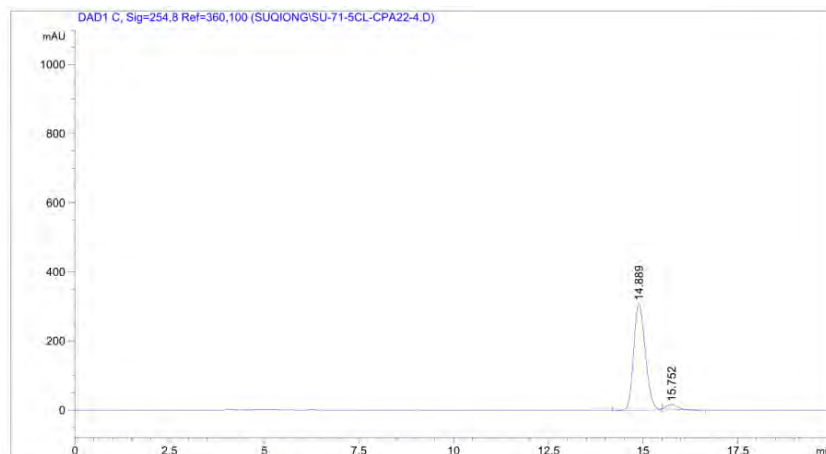

信号 1: DAD1 C, Sig=254,8 Ref=360,100

| 峰 # | 保留时间 [min] | 类型   | 峰宽 [min] | 峰面积 [mAU*s] | 峰高 [mAU]  | 峰面积 %   |
|-----|------------|------|----------|-------------|-----------|---------|
| 1   | 14.889     | MM R | 0.3585   | 6652.10156  | 309.27036 | 96.0208 |
| 2   | 15.752     | MM R | 0.3291   | 275.67303   | 13.96235  | 3.9792  |



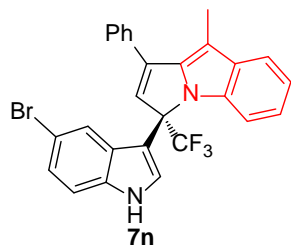

### HPLC spectrum of the racemate

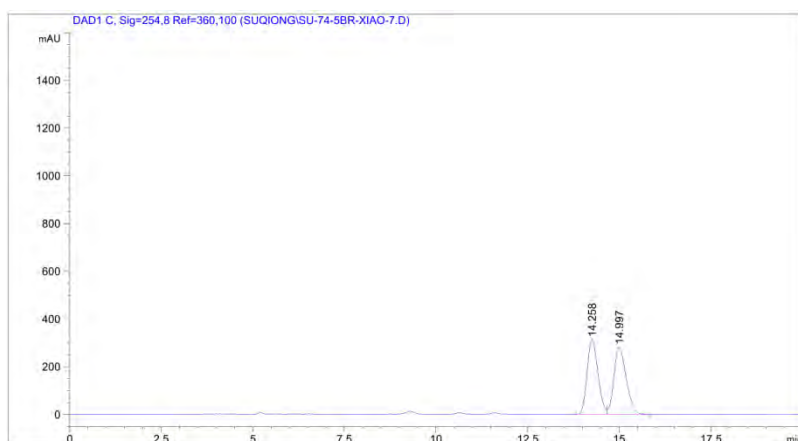

信号 1: DAD1 C, Sig=254,8 Ref=360,100

| 峰 # | 保留时间 [min] | 类型 | 峰宽 [min] | 峰面积 [mAU*s] | 峰高 [mAU]  | 峰面积 %   |
|-----|------------|----|----------|-------------|-----------|---------|
| 1   | 14.258     | BV | 0.3244   | 6495.99561  | 312.68460 | 49.6920 |
| 2   | 14.997     | VB | 0.3626   | 6576.52637  | 281.43228 | 50.3080 |

### HPLC spectrum of the enantioenriched compound

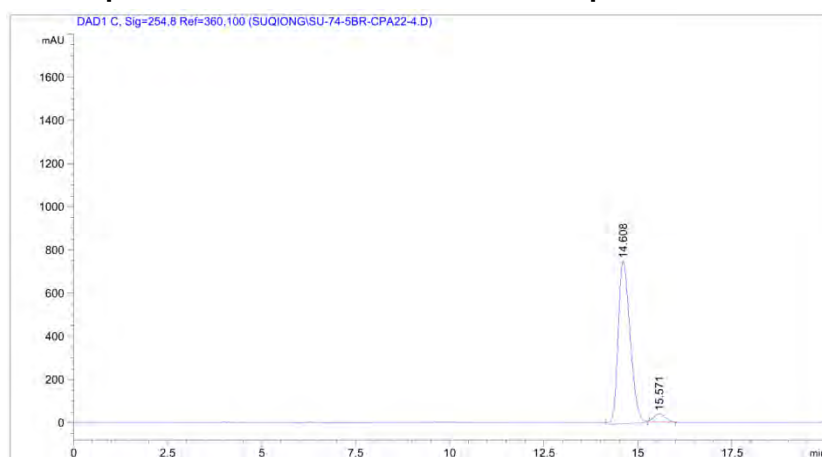

信号 1: DAD1 C, Sig=254,8 Ref=360,100

| 峰 # | 保留时间 [min] | 类型   | 峰宽 [min] | 峰面积 [mAU*s] | 峰高 [mAU]  | 峰面积 %   |
|-----|------------|------|----------|-------------|-----------|---------|
| 1   | 14.608     | MM R | 0.3682   | 1.66084e4   | 751.78986 | 95.5621 |
| 2   | 15.571     | MM R | 0.3501   | 771.28619   | 36.72207  | 4.4379  |

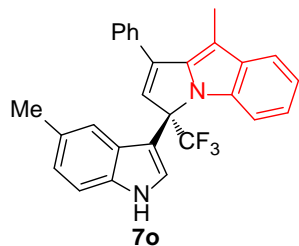

### HPLC spectrum of the racemate

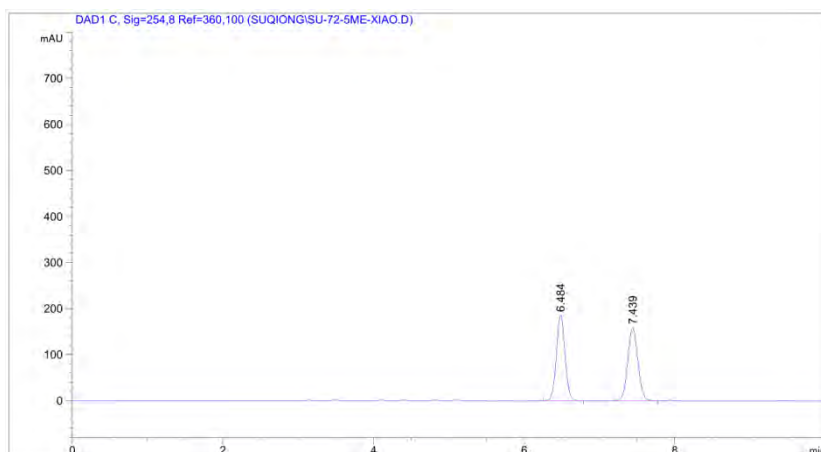

信号 1: DAD1 C, Sig=254,8 Ref=360,100

| 峰 # | 保留时间 [min] | 类型 | 峰宽 [min] | 峰面积 [mAU*s] | 峰高 [mAU]  | 峰面积 %   |
|-----|------------|----|----------|-------------|-----------|---------|
| 1   | 6.484      | BB | 0.1232   | 1490.23364  | 186.59590 | 50.0949 |
| 2   | 7.439      | BB | 0.1423   | 1484.58875  | 159.85577 | 49.9051 |

### HPLC spectrum of the enantioenriched compound

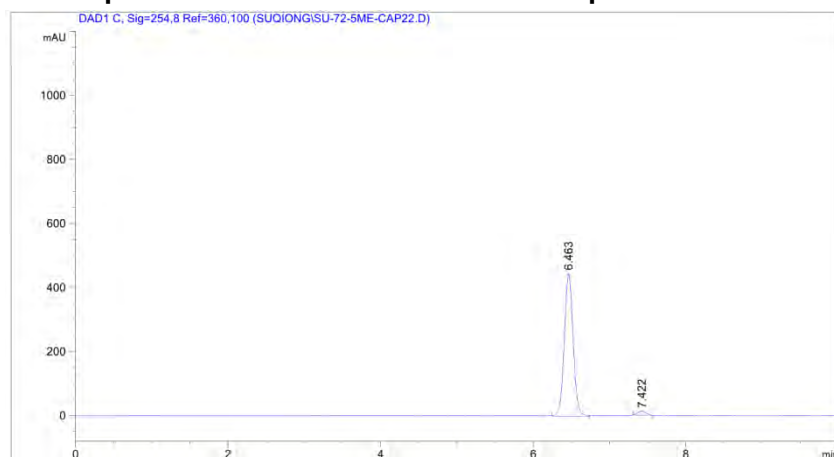

信号 1: DAD1 C, Sig=254,8 Ref=360,100

| 峰 # | 保留时间 [min] | 类型   | 峰宽 [min] | 峰面积 [mAU*s] | 峰高 [mAU]  | 峰面积 %   |
|-----|------------|------|----------|-------------|-----------|---------|
| 1   | 6.463      | MM R | 0.1340   | 3585.75830  | 446.02286 | 97.0062 |
| 2   | 7.422      | MM R | 0.1364   | 110.66398   | 13.51819  | 2.9938  |

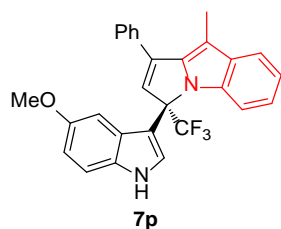

### HPLC spectrum of the racemate

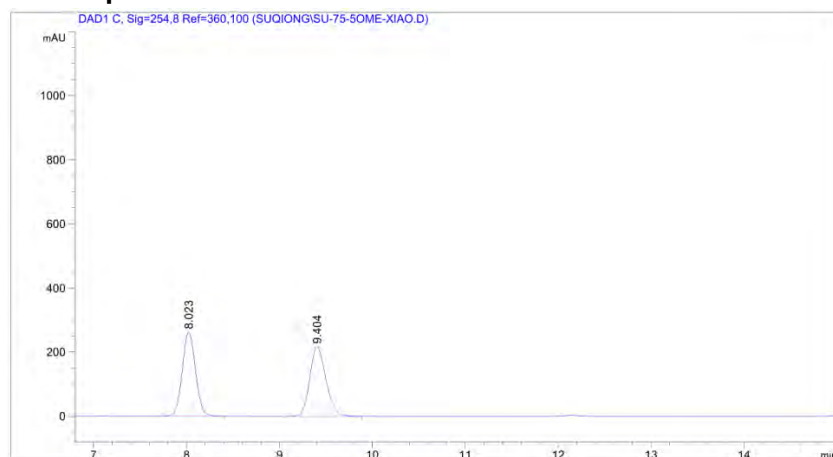

信号 1: DAD1 C, Sig=254,8 Ref=360,100

| 峰 # | 保留时间 [min] | 类型 | 峰宽 [min] | 峰面积 [mAU*s] | 峰高 [mAU]  | 峰面积 %   |
|-----|------------|----|----------|-------------|-----------|---------|
| 1   | 8.023      | BB | 0.1541   | 2608.31494  | 262.11209 | 49.8923 |
| 2   | 9.404      | BB | 0.1873   | 2619.57373  | 216.35403 | 50.1077 |

### HPLC spectrum of the enantioenriched compound

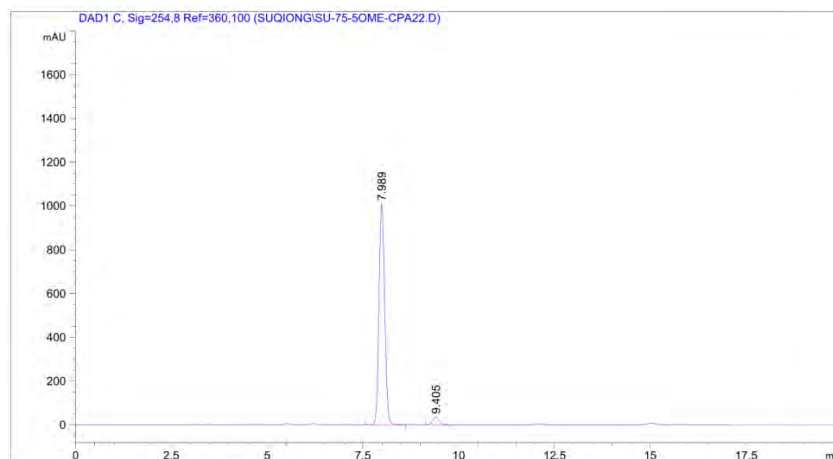

信号 1: DAD1 C, Sig=254,8 Ref=360,100

| 峰 # | 保留时间 [min] | 类型   | 峰宽 [min] | 峰面积 [mAU*s] | 峰高 [mAU]   | 峰面积 %   |
|-----|------------|------|----------|-------------|------------|---------|
| 1   | 7.989      | MM R | 0.1738   | 1.05538e4   | 1011.82202 | 96.1021 |
| 2   | 9.405      | BB   | 0.1837   | 428.06470   | 35.75466   | 3.8979  |

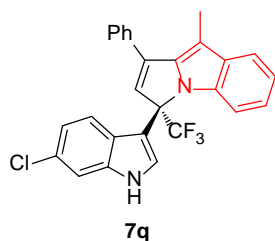

### HPLC spectrum of the racemate

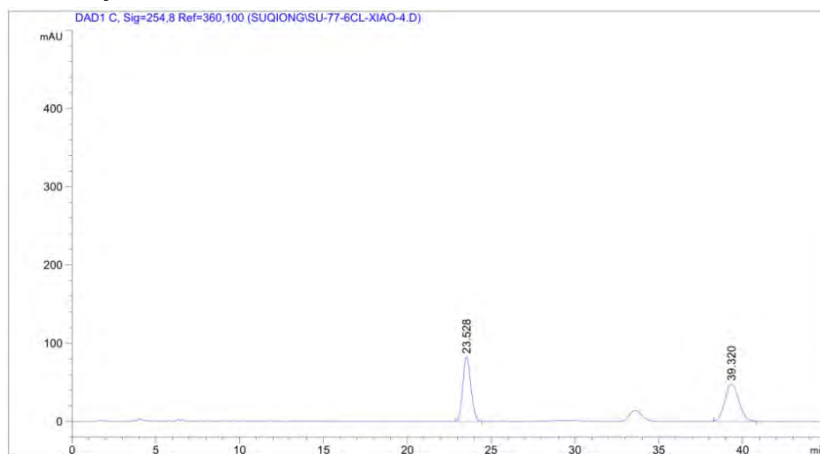

信号 1: DAD1 C, Sig=254,8 Ref=360,100

| 峰 # | 保留时间 [min] | 类型 | 峰宽 [min] | 峰面积 [mAU*s] | 峰高 [mAU] | 峰面积 %   |
|-----|------------|----|----------|-------------|----------|---------|
| 1   | 23.528     | BB | 0.5310   | 2790.59668  | 82.41557 | 50.2345 |
| 2   | 39.320     | BB | 0.8901   | 2764.54248  | 47.84552 | 49.7655 |

### HPLC spectrum of the enantioenriched compound

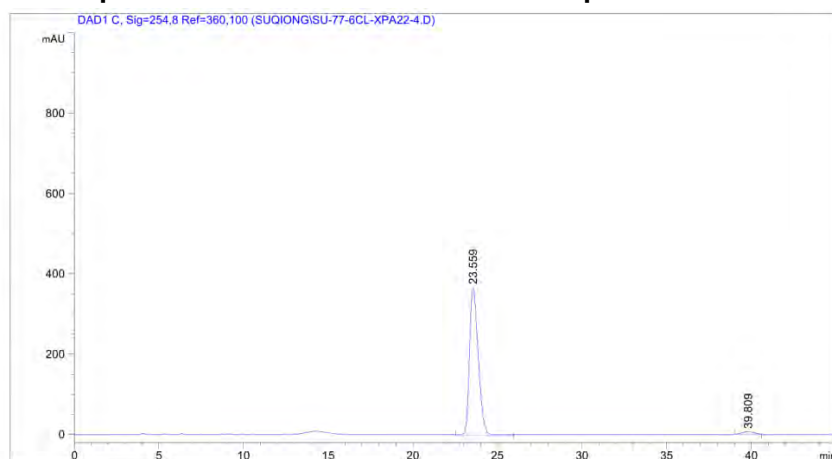

信号 1: DAD1 C, Sig=254,8 Ref=360,100

| 峰 # | 保留时间 [min] | 类型   | 峰宽 [min] | 峰面积 [mAU*s] | 峰高 [mAU]  | 峰面积 %   |
|-----|------------|------|----------|-------------|-----------|---------|
| 1   | 23.559     | MM R | 0.6128   | 1.35543e4   | 368.65265 | 97.5753 |
| 2   | 39.809     | MM R | 0.8651   | 336.81213   | 6.48879   | 2.4247  |

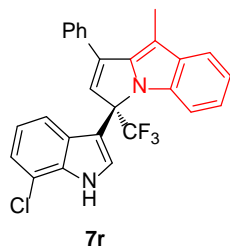

### HPLC spectrum of the racemate

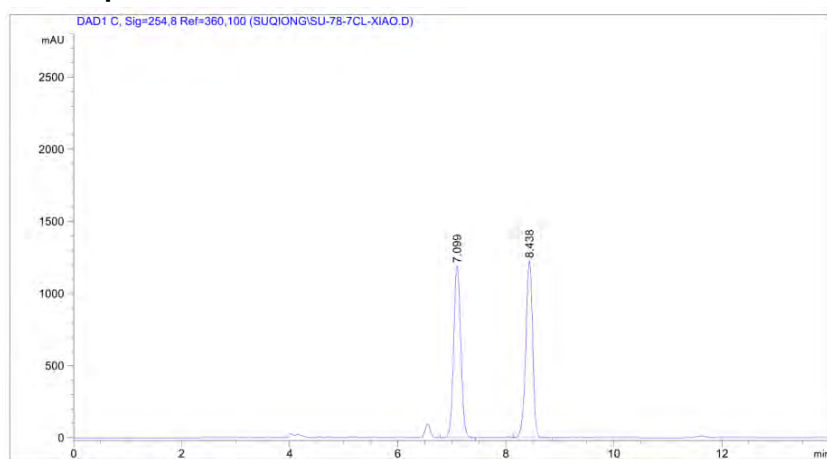

信号 1: DAD1 C, Sig=254,8 Ref=360,100

| 峰 # | 保留时间 [min] | 类型 | 峰宽 [min] | 峰面积 [mAU*s] | 峰高 [mAU]   | 峰面积 %   |
|-----|------------|----|----------|-------------|------------|---------|
| 1   | 7.099      | VV | 0.1435   | 1.09715e4   | 1190.62939 | 50.2609 |
| 2   | 8.438      | VB | 0.1395   | 1.08575e4   | 1224.45117 | 49.7391 |

### HPLC spectrum of the enantioenriched compound

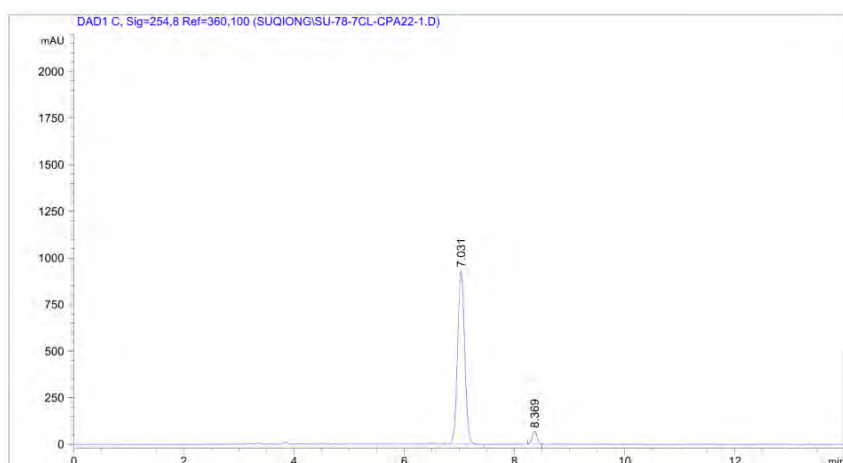

信号 1: DAD1 C, Sig=254,8 Ref=360,100

| 峰 # | 保留时间 [min] | 类型   | 峰宽 [min] | 峰面积 [mAU*s] | 峰高 [mAU]  | 峰面积 %   |
|-----|------------|------|----------|-------------|-----------|---------|
| 1   | 7.031      | MM R | 0.1506   | 8447.82227  | 934.90588 | 95.0477 |
| 2   | 8.369      | MM R | 0.1050   | 440.16122   | 69.86823  | 4.9523  |

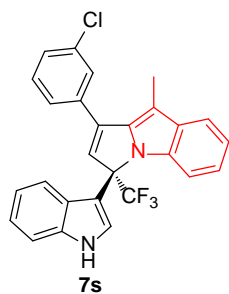

### HPLC spectrum of the racemate

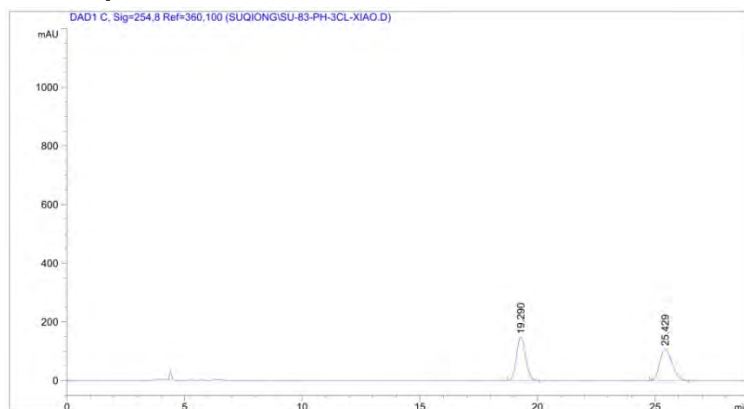

信号 1: DAD1 C, Sig=254,8 Ref=360,100

| 峰 # | 保留时间 [min] | 类型 | 峰宽 [min] | 峰面积 [mAU*s] | 峰高 [mAU]  | 峰面积 %   |
|-----|------------|----|----------|-------------|-----------|---------|
| 1   | 19.290     | BB | 0.4156   | 3978.97192  | 148.97433 | 50.0404 |
| 2   | 25.429     | BB | 0.5729   | 3972.54810  | 108.55418 | 49.9596 |

### HPLC spectrum of the enantioenriched compound

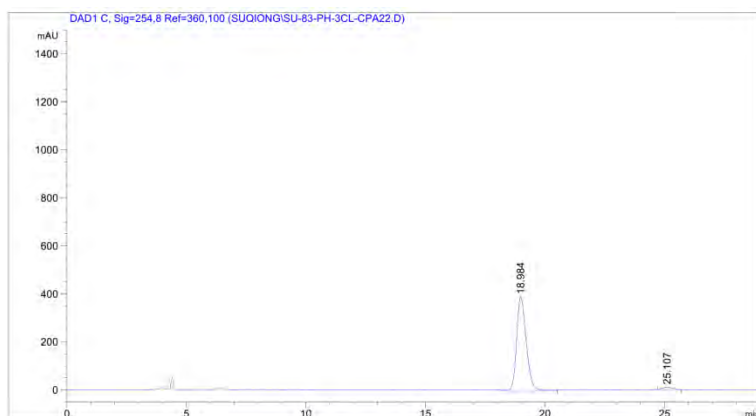

信号 1: DAD1 C, Sig=254,8 Ref=360,100

| 峰 # | 保留时间 [min] | 类型   | 峰宽 [min] | 峰面积 [mAU*s] | 峰高 [mAU]  | 峰面积 %   |
|-----|------------|------|----------|-------------|-----------|---------|
| 1   | 18.984     | MM R | 0.4788   | 1.12720e4   | 392.38956 | 97.0538 |
| 2   | 25.107     | MM R | 0.5382   | 342.18353   | 10.59705  | 2.9462  |

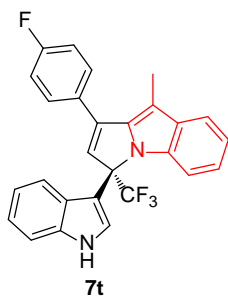

### HPLC spectrum of the racemate

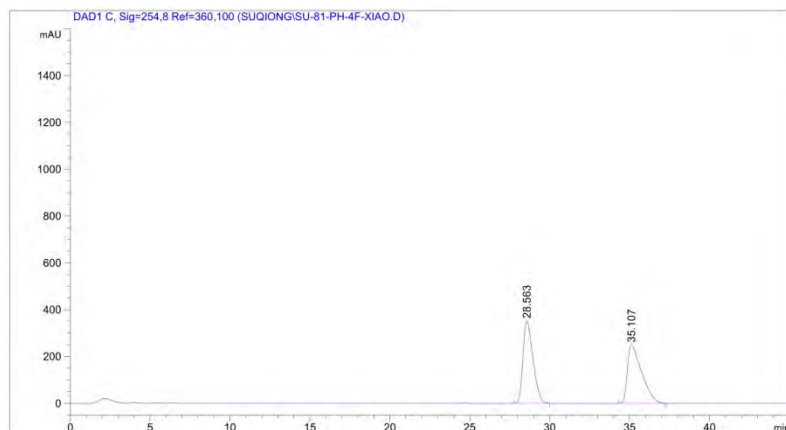

信号 1: DAD1 C, Sig=254,8 Ref=360,100

| 峰 # | 保留时间 [min] | 类型 | 峰宽 [min] | 峰面积 [mAU*s] | 峰高 [mAU]  | 峰面积 %   |
|-----|------------|----|----------|-------------|-----------|---------|
| 1   | 28.563     | BB | 0.6665   | 1.53094e4   | 349.85440 | 50.0454 |
| 2   | 35.107     | BB | 0.8946   | 1.52817e4   | 247.42220 | 49.9546 |

### HPLC spectrum of the enantioenriched compound

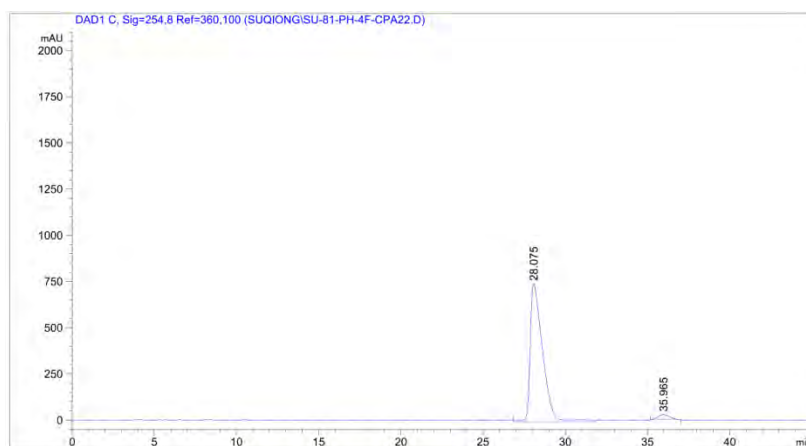

信号 1: DAD1 C, Sig=254,8 Ref=360,100

| 峰 # | 保留时间 [min] | 类型   | 峰宽 [min] | 峰面积 [mAU*s] | 峰高 [mAU]  | 峰面积 %   |
|-----|------------|------|----------|-------------|-----------|---------|
| 1   | 28.075     | MM R | 0.8747   | 3.91391e4   | 745.76062 | 96.9779 |
| 2   | 35.965     | MM R | 0.7702   | 1219.67957  | 26.39335  | 3.0221  |

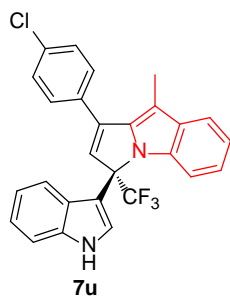

### HPLC spectrum of the racemate

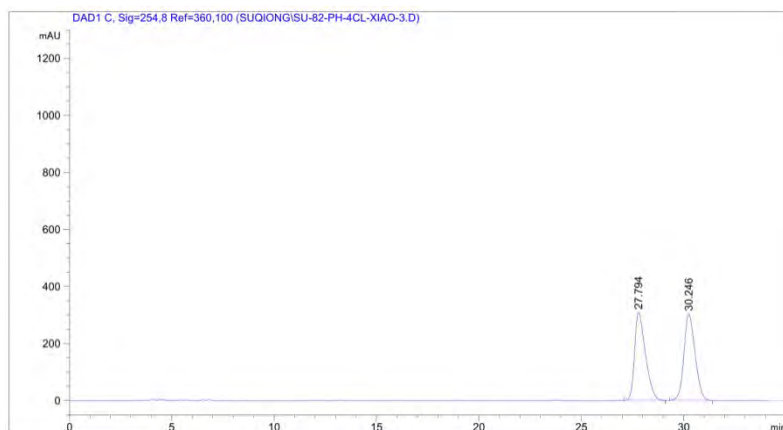

信号 1: DAD1 C, Sig=254,8 Ref=360,100

| 峰 # | 保留时间 [min] | 类型 | 峰宽 [min] | 峰面积 [mAU*s] | 峰高 [mAU]  | 峰面积 %   |
|-----|------------|----|----------|-------------|-----------|---------|
| 1   | 27.794     | BB | 0.5582   | 1.14608e4   | 309.36377 | 49.7958 |
| 2   | 30.246     | BB | 0.5815   | 1.15548e4   | 303.96811 | 50.2042 |

### HPLC spectrum of the enantioenriched compound

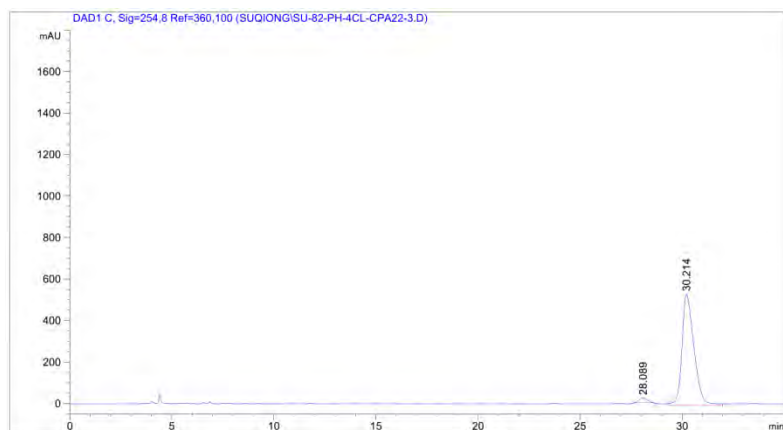

信号 1: DAD1 C, Sig=254,8 Ref=360,100

| 峰 # | 保留时间 [min] | 类型   | 峰宽 [min] | 峰面积 [mAU*s] | 峰高 [mAU]  | 峰面积 %   |
|-----|------------|------|----------|-------------|-----------|---------|
| 1   | 28.089     | MM R | 0.4811   | 675.60638   | 23.40498  | 2.9637  |
| 2   | 30.214     | MM R | 0.6879   | 2.21203e4   | 535.94647 | 97.0363 |



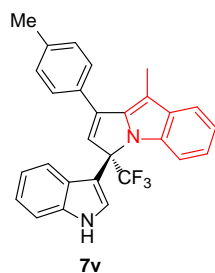

### HPLC spectrum of the racemate

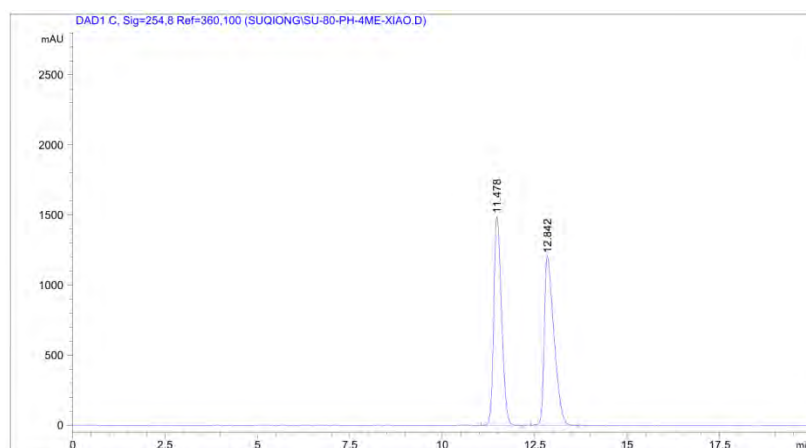

信号 1: DAD1 C, Sig=254,8 Ref=360,100

| 峰 # | 保留时间 [min] | 类型   | 峰宽 [min] | 峰面积 [mAU*s] | 峰高 [mAU]   | 峰面积 %   |
|-----|------------|------|----------|-------------|------------|---------|
| 1   | 11.478     | BB   | 0.2268   | 2.18604e4   | 1493.42297 | 49.7697 |
| 2   | 12.842     | MM R | 0.3042   | 2.20627e4   | 1208.96570 | 50.2303 |

### HPLC spectrum of the enantioenriched compound

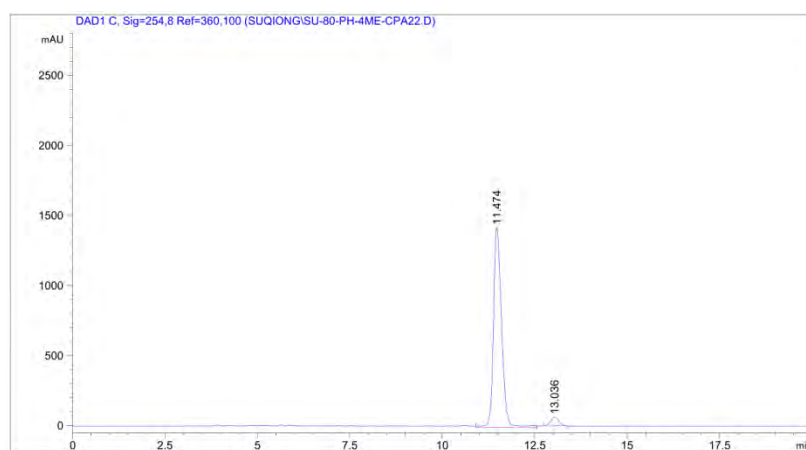

信号 1: DAD1 C, Sig=254,8 Ref=360,100

| 峰 # | 保留时间 [min] | 类型   | 峰宽 [min] | 峰面积 [mAU*s] | 峰高 [mAU]   | 峰面积 %   |
|-----|------------|------|----------|-------------|------------|---------|
| 1   | 11.474     | MM R | 0.2550   | 2.18122e4   | 1425.41052 | 96.0029 |
| 2   | 13.036     | MM R | 0.2494   | 908.15826   | 60.69851   | 3.9971  |

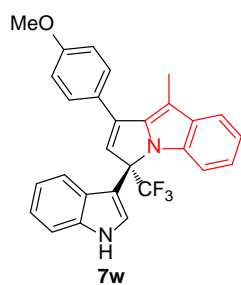

### HPLC spectrum of the racemate

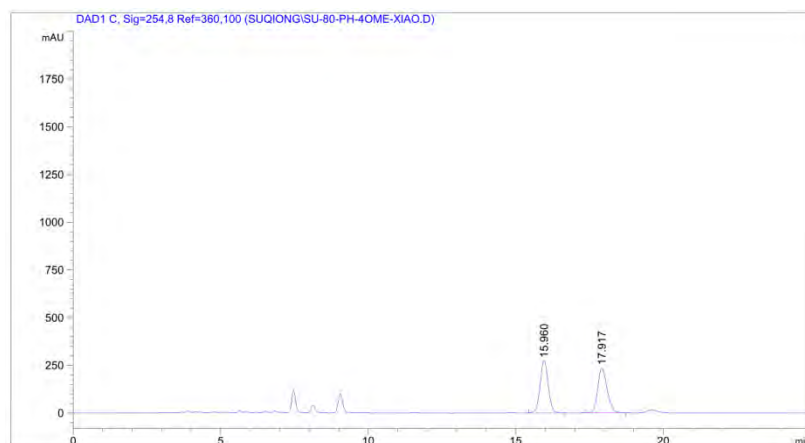

信号 1: DAD1 C, Sig=254,8 Ref=360,100

| 峰 # | 保留时间 [min] | 类型 | 峰宽 [min] | 峰面积 [mAU*s] | 峰高 [mAU]  | 峰面积 %   |
|-----|------------|----|----------|-------------|-----------|---------|
| 1   | 15.960     | BB | 0.2975   | 5240.27344  | 273.54486 | 50.0577 |
| 2   | 17.917     | BB | 0.3432   | 5228.19922  | 235.31403 | 49.9423 |

### HPLC spectrum of the enantioenriched compound

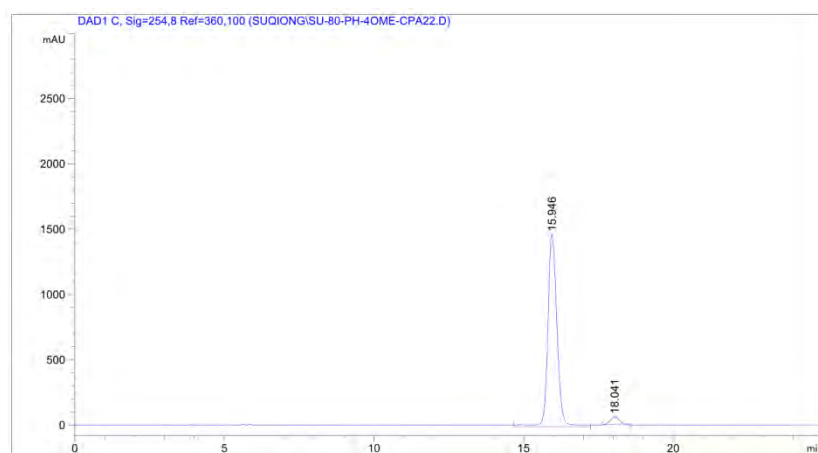

信号 1: DAD1 C, Sig=254,8 Ref=360,100

| 峰 # | 保留时间 [min] | 类型   | 峰宽 [min] | 峰面积 [mAU*s] | 峰高 [mAU]   | 峰面积 %   |
|-----|------------|------|----------|-------------|------------|---------|
| 1   | 15.946     | MM R | 0.3551   | 3.13852e4   | 1473.01880 | 96.5493 |
| 2   | 18.041     | MM R | 0.3248   | 1121.72852  | 57.56024   | 3.4507  |

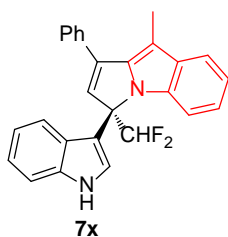

### HPLC spectrum of the racemate

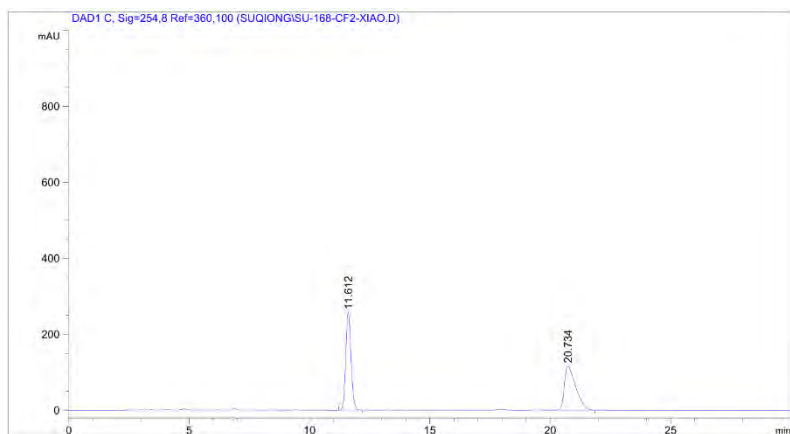

信号 1: DAD1 C, Sig=254,8 Ref=360,100

| 峰 # | 保留时间 [min] | 类型 | 峰宽 [min] | 峰面积 [mAU*s] | 峰高 [mAU]  | 峰面积 %   |
|-----|------------|----|----------|-------------|-----------|---------|
| 1   | 11.612     | BB | 0.2361   | 3929.65210  | 257.37299 | 50.6863 |
| 2   | 20.734     | BB | 0.4842   | 3823.23804  | 116.69958 | 49.3137 |

### HPLC spectrum of the enantioenriched compound

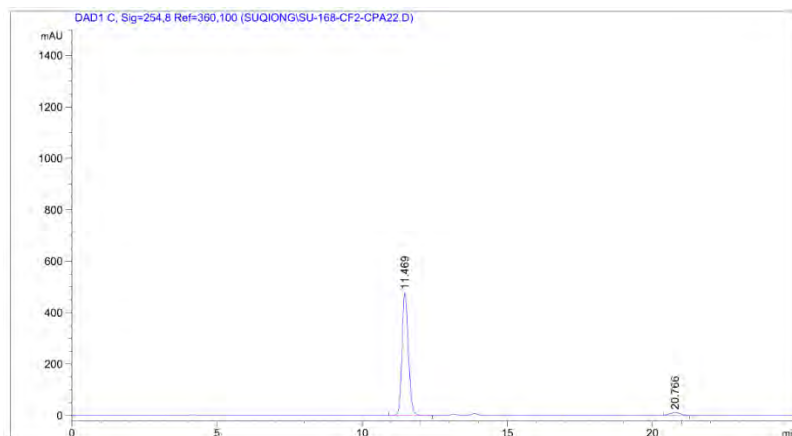

信号 1: DAD1 C, Sig=254,8 Ref=360,100

| 峰 # | 保留时间 [min] | 类型   | 峰宽 [min] | 峰面积 [mAU*s] | 峰高 [mAU]  | 峰面积 %   |
|-----|------------|------|----------|-------------|-----------|---------|
| 1   | 11.469     | MM R | 0.2561   | 7365.41211  | 479.30130 | 96.0026 |
| 2   | 20.766     | MM R | 0.4553   | 306.68533   | 11.22705  | 3.9974  |

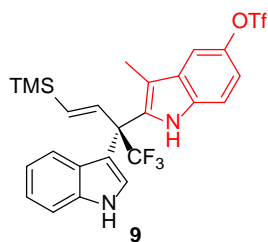

### HPLC spectrum of the racemate

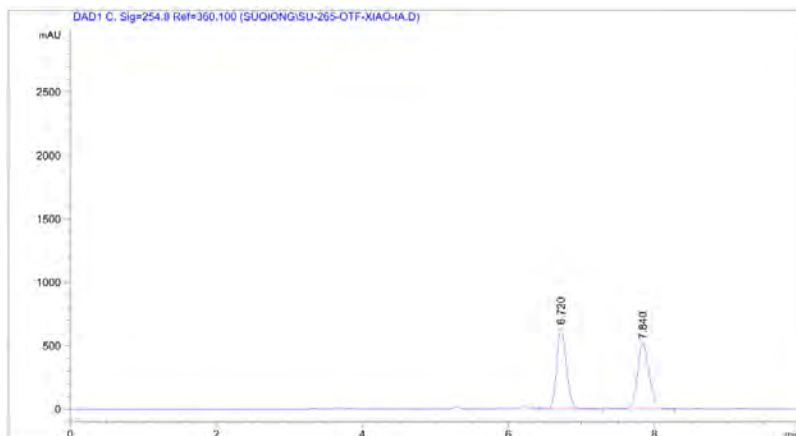

信号 1: DAD1 C, Sig=254,8 Ref=360,100

| 峰 # | 保留时间 [min] | 类型 | 峰宽 [min] | 峰面积 [mAU*s] | 峰高 [mAU]  | 峰面积 %   |
|-----|------------|----|----------|-------------|-----------|---------|
| 1   | 6.720      | VB | 0.1418   | 5919.94434  | 640.40234 | 50.6825 |
| 2   | 7.840      | VB | 0.1662   | 5760.51318  | 524.17725 | 49.3175 |

### HPLC spectrum of the enantioenriched compound

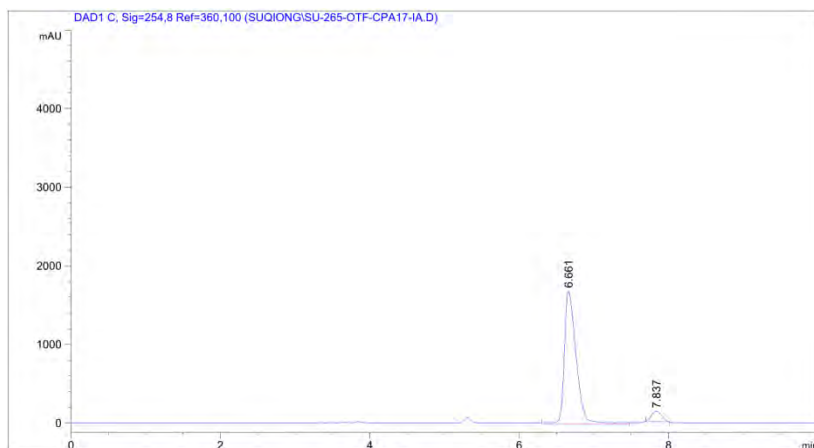

信号 1: DAD1 C, Sig=254,8 Ref=360,100

| 峰 # | 保留时间 [min] | 类型   | 峰宽 [min] | 峰面积 [mAU*s] | 峰高 [mAU]   | 峰面积 %   |
|-----|------------|------|----------|-------------|------------|---------|
| 1   | 6.661      | MM R | 0.1839   | 1.86807e4   | 1692.97815 | 93.8072 |
| 2   | 7.837      | MM R | 0.1565   | 1233.23828  | 131.30882  | 6.1928  |

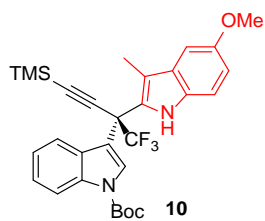

### HPLC spectrum of the racemate

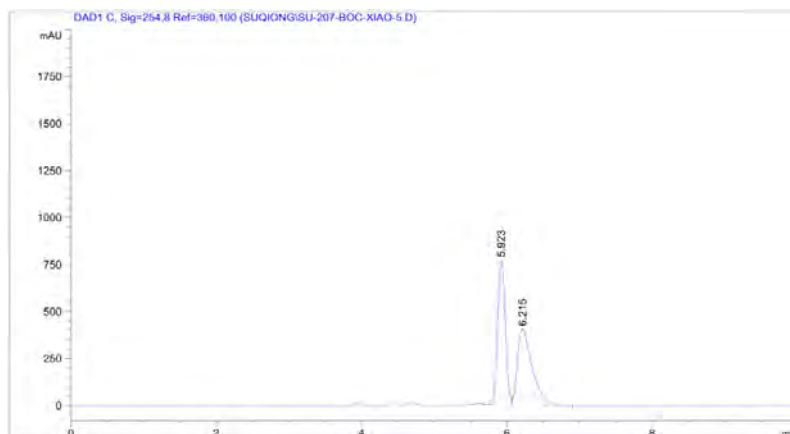

信号 1: DAD1 C, Sig=254,8 Ref=360,100

| 峰 # | 保留时间 [min] | 类型 | 峰宽 [min] | 峰面积 [mAU*s] | 峰高 [mAU]  | 峰面积 %   |
|-----|------------|----|----------|-------------|-----------|---------|
| 1   | 5.923      | VV | 0.1157   | 5669.83643  | 771.99023 | 49.6558 |
| 2   | 6.215      | VB | 0.2109   | 5748.44141  | 406.63214 | 50.3442 |

### HPLC spectrum of the enantioenriched compound

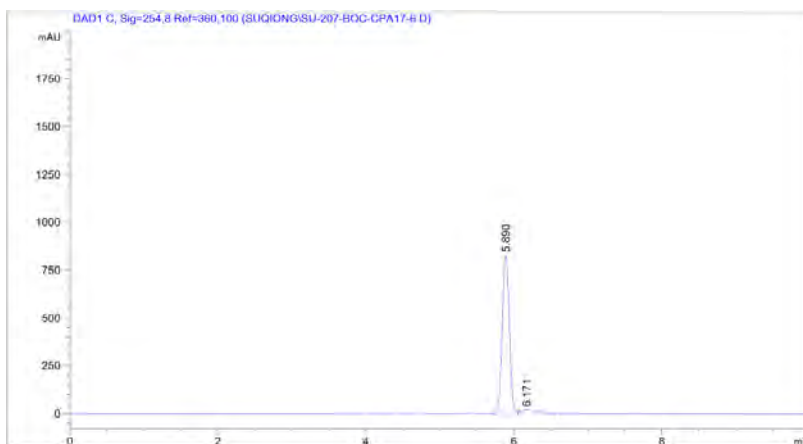

信号 1: DAD1 C, Sig=254,8 Ref=360,100

| 峰 # | 保留时间 [min] | 类型   | 峰宽 [min] | 峰面积 [mAU*s] | 峰高 [mAU]  | 峰面积 %   |
|-----|------------|------|----------|-------------|-----------|---------|
| 1   | 5.890      | MM R | 0.1118   | 5585.61230  | 832.78998 | 95.0047 |
| 2   | 6.171      | MM R | 0.2628   | 293.68759   | 18.62638  | 4.9953  |

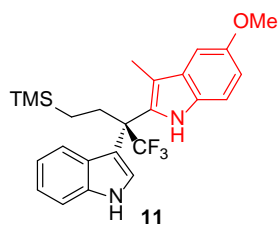

### HPLC spectrum of the racemate

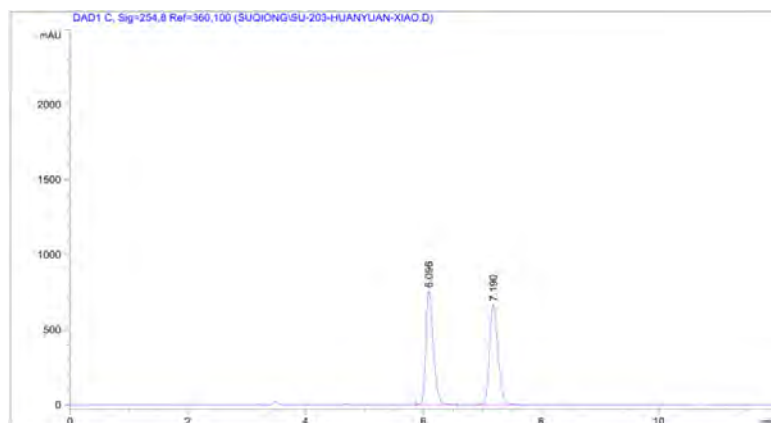

信号 1: DAD1 C, Sig=254,8 Ref=360,100

| 峰 # | 保留时间 [min] | 类型 | 峰宽 [min] | 峰面积 [mAU*s] | 峰高 [mAU]  | 峰面积 %   |
|-----|------------|----|----------|-------------|-----------|---------|
| 1   | 6.096      | BB | 0.1341   | 6633.90967  | 758.40570 | 49.9826 |
| 2   | 7.190      | BB | 0.1537   | 6638.53711  | 669.38824 | 50.0174 |

### HPLC spectrum of the enantioenriched compound

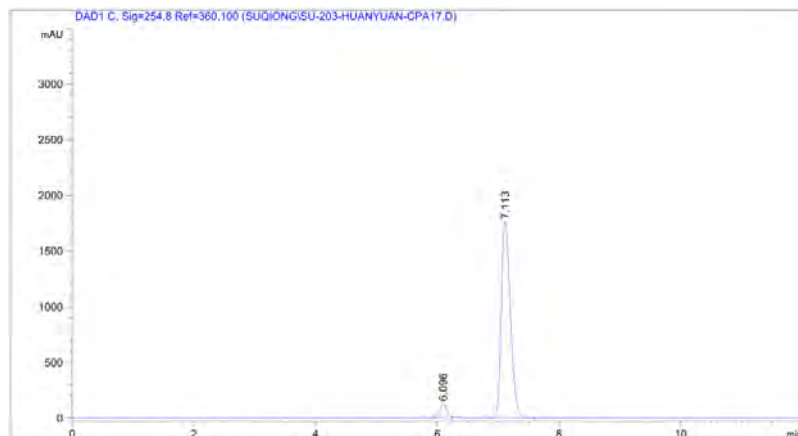

信号 1: DAD1 C, Sig=254,8 Ref=360,100

| 峰 # | 保留时间 [min] | 类型   | 峰宽 [min] | 峰面积 [mAU*s] | 峰高 [mAU]   | 峰面积 %   |
|-----|------------|------|----------|-------------|------------|---------|
| 1   | 6.096      | MM R | 0.1293   | 946.74536   | 122.04750  | 4.9459  |
| 2   | 7.113      | MM R | 0.1720   | 1.81954e4   | 1762.76563 | 95.0541 |

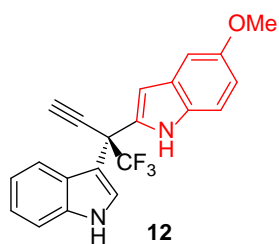

### HPLC spectrum of the racemate

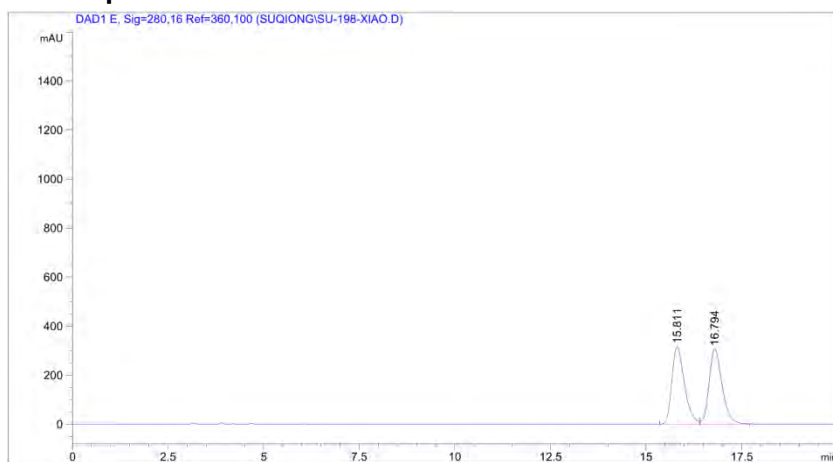

信号 1: DAD1 E, Sig=280,16 Ref=360,100

| 峰 # | 保留时间 [min] | 类型 | 峰宽 [min] | 峰面积 [mAU*s] | 峰高 [mAU]  | 峰面积 %   |
|-----|------------|----|----------|-------------|-----------|---------|
| 1   | 15.811     | BV | 0.3481   | 7206.50244  | 315.92880 | 49.6791 |
| 2   | 16.794     | VB | 0.3638   | 7299.59473  | 306.50861 | 50.3209 |

### HPLC spectrum of the enantioenriched compound

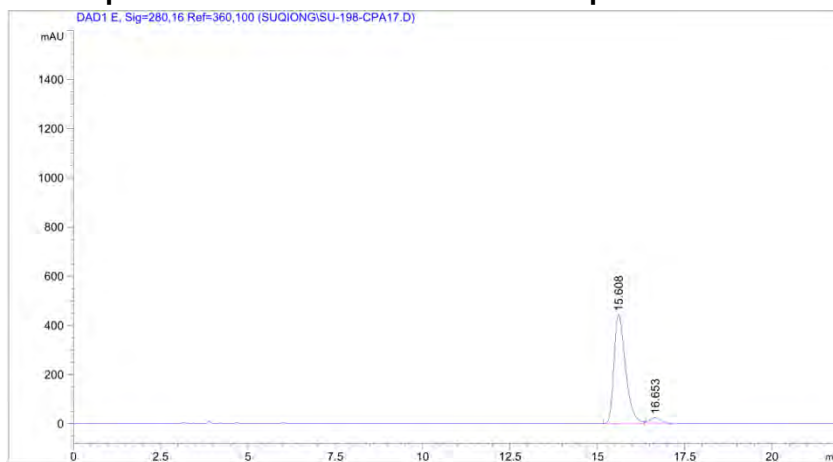

信号 1: DAD1 E, Sig=280,16 Ref=360,100

| 峰 # | 保留时间 [min] | 类型   | 峰宽 [min] | 峰面积 [mAU*s] | 峰高 [mAU]  | 峰面积 %   |
|-----|------------|------|----------|-------------|-----------|---------|
| 1   | 15.608     | BV   | 0.3501   | 1.02169e4   | 444.54013 | 95.0921 |
| 2   | 16.653     | MM R | 0.3692   | 527.31067   | 23.80418  | 4.9079  |

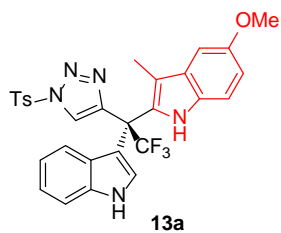

### HPLC spectrum of the racemate

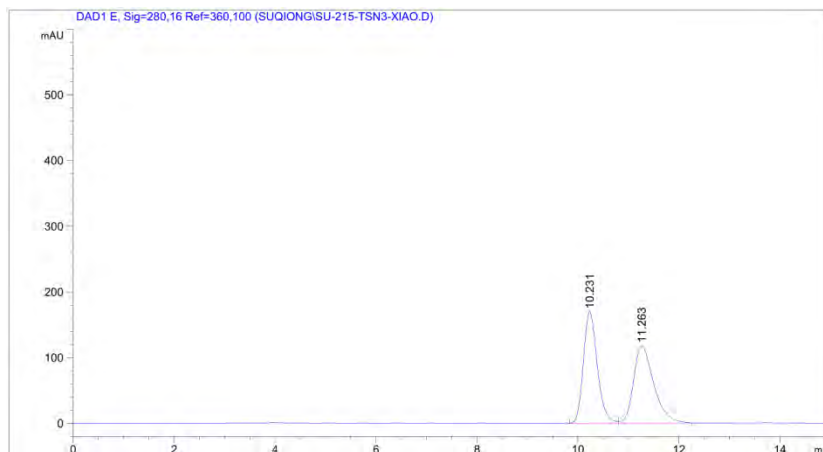

信号 1: DAD1 E, Sig=280,16 Ref=360,100

| 峰 # | 保留时间 [min] | 类型 | 峰宽 [min] | 峰面积 [mAU*s] | 峰高 [mAU]  | 峰面积 %   |
|-----|------------|----|----------|-------------|-----------|---------|
| 1   | 10.231     | BV | 0.2930   | 3247.32690  | 169.90356 | 49.7679 |
| 2   | 11.263     | VB | 0.4197   | 3277.61304  | 118.11917 | 50.2321 |

### HPLC spectrum of the enantioenriched compound

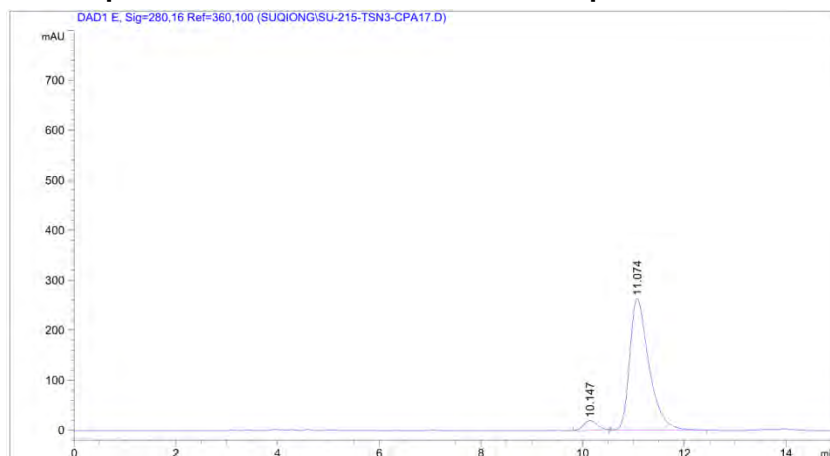

信号 1: DAD1 E, Sig=280,16 Ref=360,100

| 峰 # | 保留时间 [min] | 类型   | 峰宽 [min] | 峰面积 [mAU*s] | 峰高 [mAU]  | 峰面积 %   |
|-----|------------|------|----------|-------------|-----------|---------|
| 1   | 10.147     | MM R | 0.3063   | 353.15167   | 19.21571  | 4.8689  |
| 2   | 11.074     | MM R | 0.4378   | 6900.07324  | 262.69638 | 95.1311 |



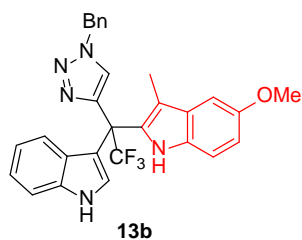

### HPLC spectrum of the racemate

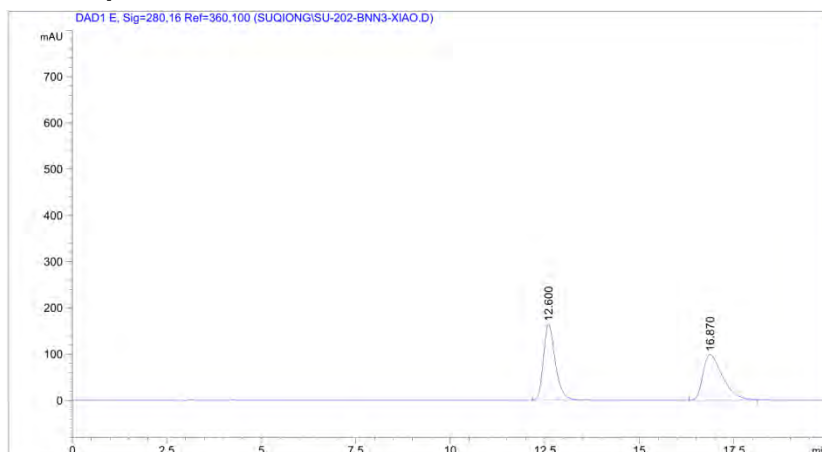

信号 1: DAD1 E, Sig=280,16 Ref=360,100

| 峰 # | 保留时间 [min] | 类型 | 峰宽 [min] | 峰面积 [mAU*s] | 峰高 [mAU]  | 峰面积 %   |
|-----|------------|----|----------|-------------|-----------|---------|
| 1   | 12.600     | BB | 0.3326   | 3585.33130  | 164.29674 | 50.1748 |
| 2   | 16.870     | BB | 0.5437   | 3560.35059  | 98.50208  | 49.8252 |

### HPLC spectrum of the enantioenriched compound

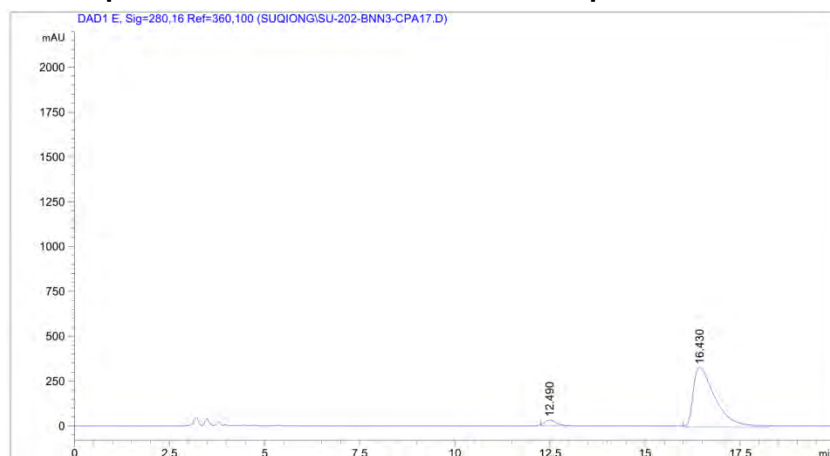

信号 1: DAD1 E, Sig=280,16 Ref=360,100

| 峰 # | 保留时间 [min] | 类型   | 峰宽 [min] | 峰面积 [mAU*s] | 峰高 [mAU]  | 峰面积 %   |
|-----|------------|------|----------|-------------|-----------|---------|
| 1   | 12.490     | MM R | 0.3466   | 683.70380   | 32.87796  | 4.8657  |
| 2   | 16.430     | MM R | 0.6697   | 1.33677e4   | 332.69107 | 95.1343 |

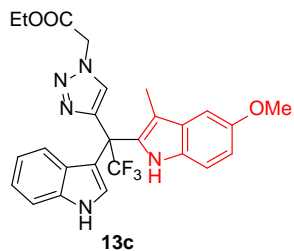

### HPLC spectrum of the racemate

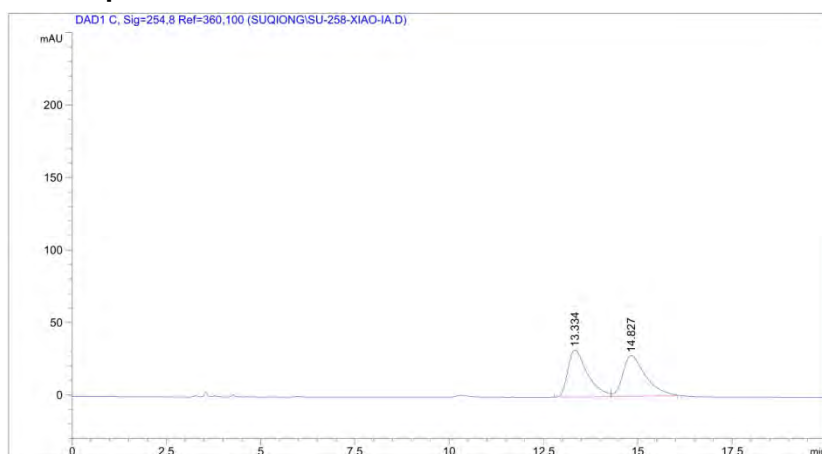

信号 1: DAD1 C, Sig=254,8 Ref=360,100

| 峰 # | 保留时间 [min] | 类型 | 峰宽 [min] | 峰面积 [mAU*s] | 峰高 [mAU] | 峰面积 %   |
|-----|------------|----|----------|-------------|----------|---------|
| 1   | 13.334     | BB | 0.5306   | 1175.22107  | 32.44120 | 49.7825 |
| 2   | 14.827     | BB | 0.6179   | 1185.49219  | 28.23277 | 50.2175 |

### HPLC spectrum of the enantioenriched compound

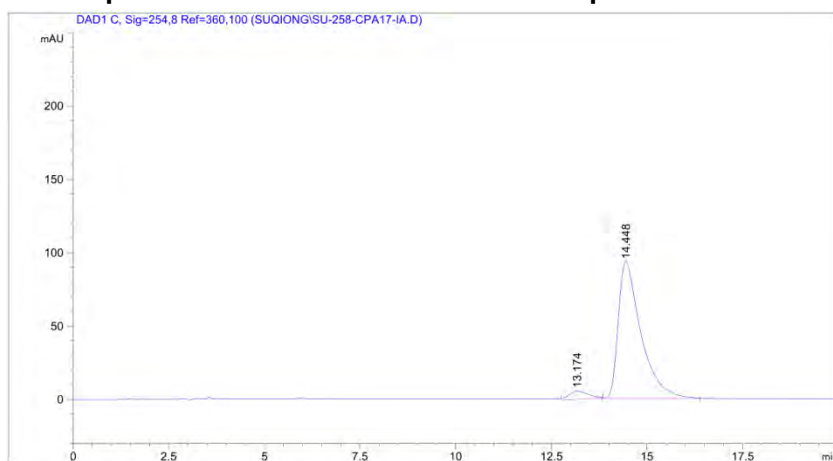

信号 1: DAD1 C, Sig=254,8 Ref=360,100

| 峰 # | 保留时间 [min] | 类型   | 峰宽 [min] | 峰面积 [mAU*s] | 峰高 [mAU] | 峰面积 %   |
|-----|------------|------|----------|-------------|----------|---------|
| 1   | 13.174     | MM R | 0.5830   | 198.27950   | 5.66837  | 4.9265  |
| 2   | 14.448     | MM R | 0.6875   | 3826.47974  | 92.75937 | 95.0735 |

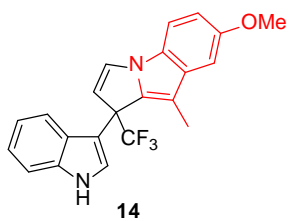

### HPLC spectrum of the racemate

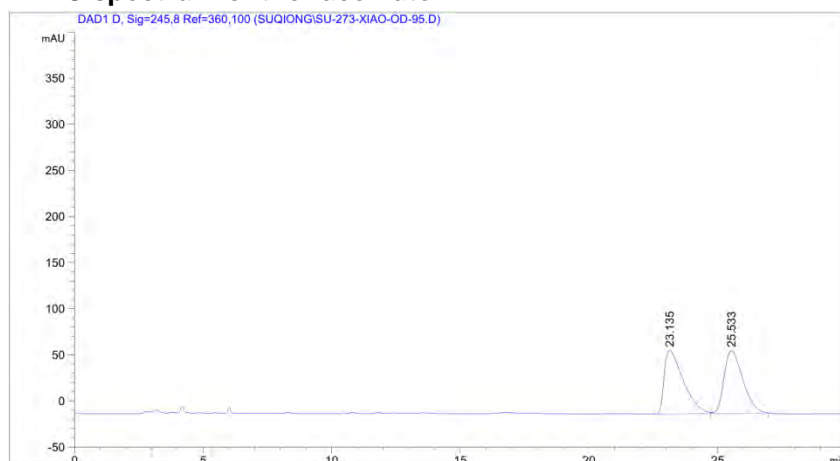

信号 1: DAD1 D, Sig=245,8 Ref=360,100

| 峰 # | 保留时间 [min] | 类型 | 峰宽 [min] | 峰面积 [mAU*s] | 峰高 [mAU] | 峰面积 %   |
|-----|------------|----|----------|-------------|----------|---------|
| 1   | 23.135     | BB | 0.7424   | 3554.70190  | 69.07317 | 50.5396 |
| 2   | 25.533     | BB | 0.7740   | 3478.79468  | 68.56055 | 49.4604 |

### HPLC spectrum of the enantioenriched compound

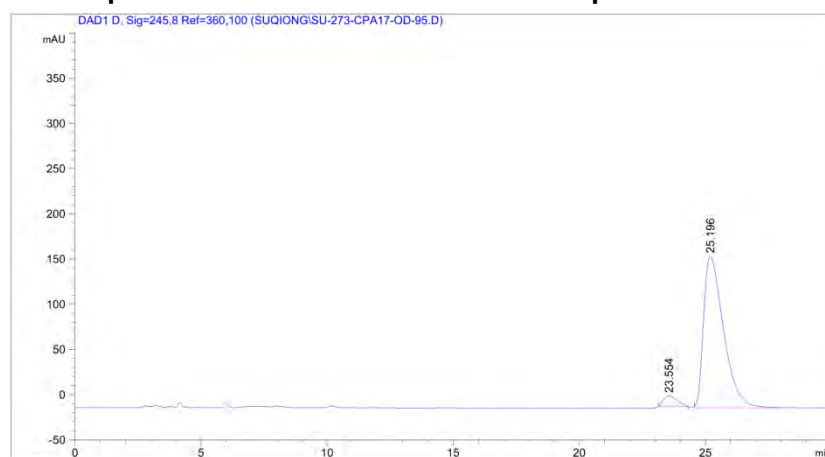

信号 1: DAD1 D, Sig=245,8 Ref=360,100

| 峰 # | 保留时间 [min] | 类型   | 峰宽 [min] | 峰面积 [mAU*s] | 峰高 [mAU]  | 峰面积 %   |
|-----|------------|------|----------|-------------|-----------|---------|
| 1   | 23.554     | MM R | 0.6490   | 462.59393   | 11.87952  | 4.7971  |
| 2   | 25.196     | MM R | 0.9122   | 9180.56934  | 167.73528 | 95.2029 |

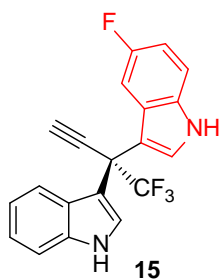

### HPLC spectrum of the racemate

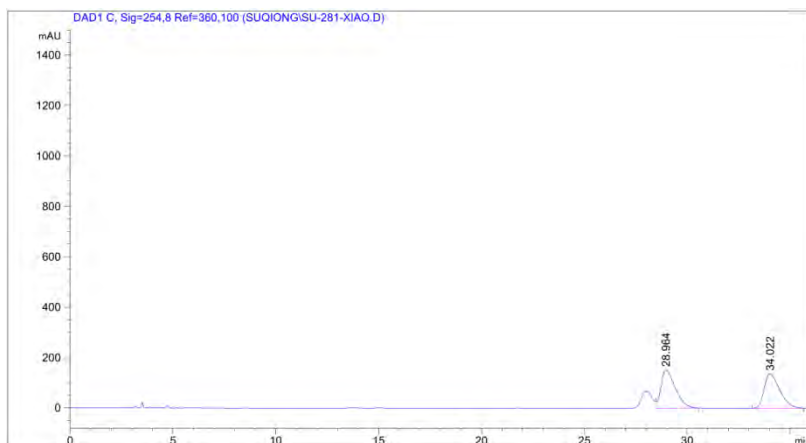

信号 1: DAD1 C, Sig=254,8 Ref=360,100

| 峰 # | 保留时间 [min] | 类型 | 峰宽 [min] | 峰面积 [mAU*s] | 峰高 [mAU]  | 峰面积 %   |
|-----|------------|----|----------|-------------|-----------|---------|
| 1   | 28.964     | VB | 0.7156   | 7387.07520  | 152.37549 | 50.6187 |
| 2   | 34.022     | BB | 0.8038   | 7206.48779  | 137.42061 | 49.3813 |

### HPLC spectrum of the enantioenriched compound

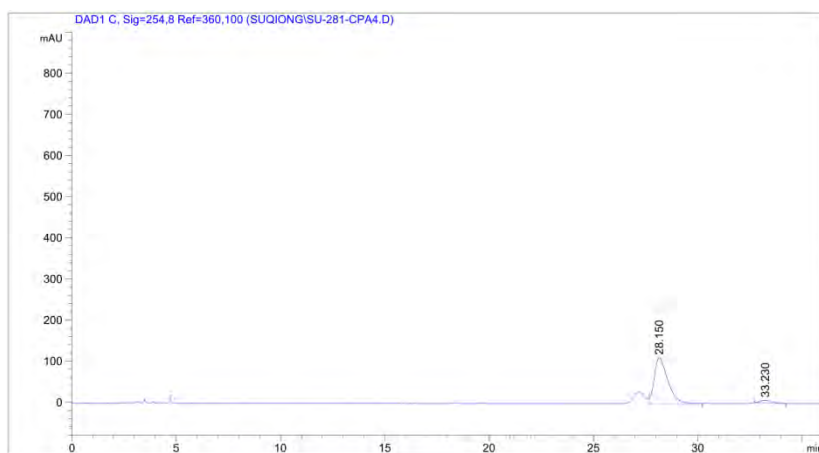

信号 1: DAD1 C, Sig=254,8 Ref=360,100

| 峰 # | 保留时间 [min] | 类型   | 峰宽 [min] | 峰面积 [mAU*s] | 峰高 [mAU]  | 峰面积 %   |
|-----|------------|------|----------|-------------|-----------|---------|
| 1   | 28.150     | FM R | 0.7879   | 5377.03174  | 113.73604 | 95.0486 |
| 2   | 33.230     | MM R | 0.7371   | 280.10861   | 6.33354   | 4.9514  |

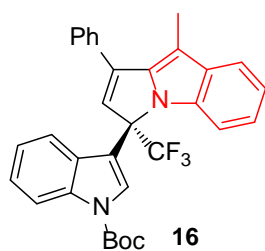

### HPLC spectrum of the racemate

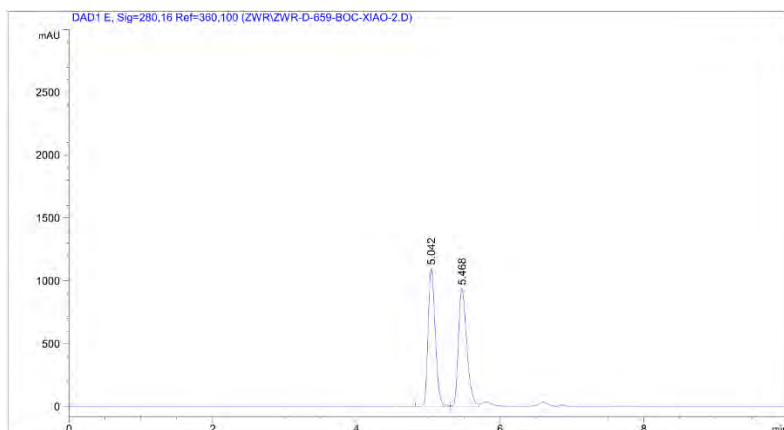

信号 1: DAD1 E, Sig=280,16 Ref=360,100

| 峰 # | 保留时间 [min] | 类型 | 峰宽 [min] | 峰面积 [mAU*s] | 峰高 [mAU]   | 峰面积 %   |
|-----|------------|----|----------|-------------|------------|---------|
| 1   | 5.042      | BV | 0.1080   | 7558.80908  | 1102.51062 | 49.7414 |
| 2   | 5.468      | VV | 0.1267   | 7637.39404  | 940.70972  | 50.2586 |

### HPLC spectrum of the enantioenriched compound

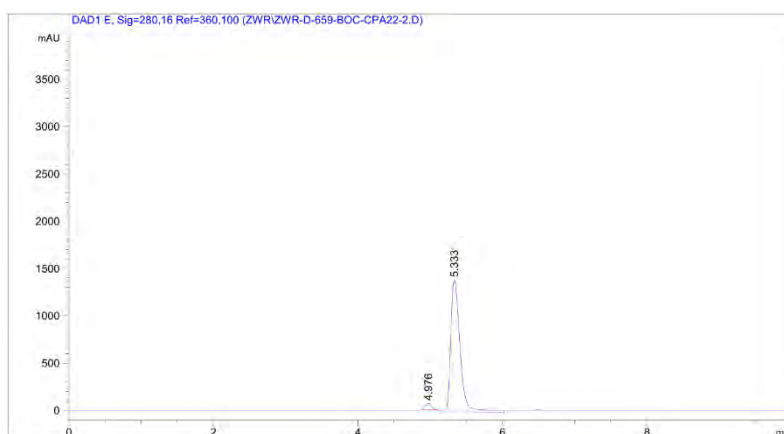

信号 1: DAD1 E, Sig=280,16 Ref=360,100

| 峰 # | 保留时间 [min] | 类型   | 峰宽 [min] | 峰面积 [mAU*s] | 峰高 [mAU]   | 峰面积 %   |
|-----|------------|------|----------|-------------|------------|---------|
| 1   | 4.976      | MM R | 0.0971   | 385.91965   | 66.26553   | 2.9520  |
| 2   | 5.333      | MM R | 0.1517   | 1.26872e4   | 1394.01501 | 97.0480 |

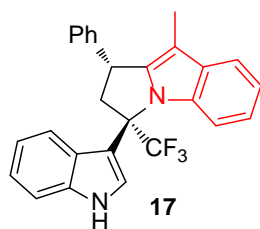

### HPLC spectrum of the racemate

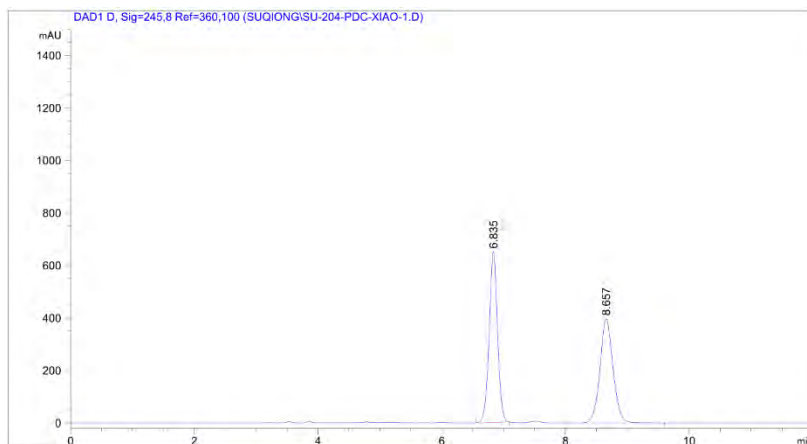

信号 1: DAD1 D, Sig=245,8 Ref=360,100

| 峰 # | 保留时间 [min] | 类型   | 峰宽 [min] | 峰面积 [mAU*s] | 峰高 [mAU]  | 峰面积 %   |
|-----|------------|------|----------|-------------|-----------|---------|
| 1   | 6.835      | MM R | 0.1561   | 6091.70166  | 650.25342 | 50.8839 |
| 2   | 8.657      | MM R | 0.2464   | 5880.05518  | 397.78967 | 49.1161 |

### HPLC spectrum of the enantioenriched compound

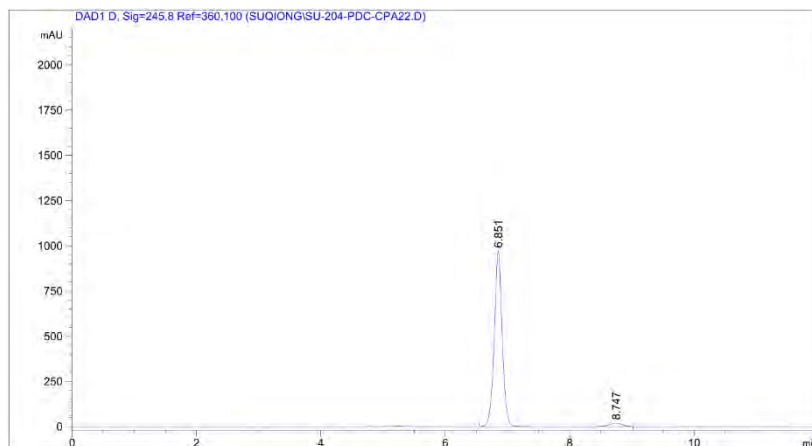

信号 1: DAD1 D, Sig=245,8 Ref=360,100

| 峰 # | 保留时间 [min] | 类型   | 峰宽 [min] | 峰面积 [mAU*s] | 峰高 [mAU]  | 峰面积 %   |
|-----|------------|------|----------|-------------|-----------|---------|
| 1   | 6.851      | BB   | 0.1293   | 8601.51660  | 971.11609 | 97.0026 |
| 2   | 8.747      | MM R | 0.2339   | 265.79160   | 18.94224  | 2.9974  |

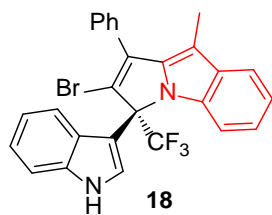

### HPLC spectrum of the racemate

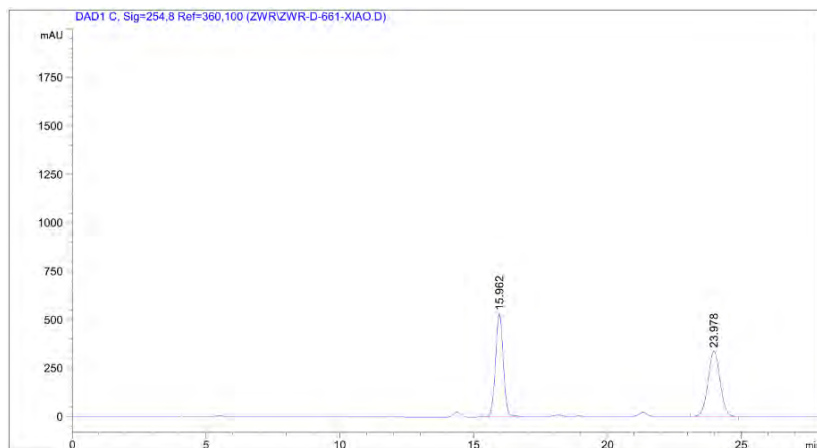

信号 1: DAD1 C, Sig=254,8 Ref=360,100

| 峰 # | 保留时间 [min] | 类型 | 峰宽 [min] | 峰面积 [mAU*s] | 峰高 [mAU]  | 峰面积 %   |
|-----|------------|----|----------|-------------|-----------|---------|
| 1   | 15.962     | BB | 0.3120   | 1.08009e4   | 534.01611 | 50.3372 |
| 2   | 23.978     | BB | 0.4873   | 1.06562e4   | 338.46390 | 49.6628 |

### HPLC spectrum of the enantioenriched compound

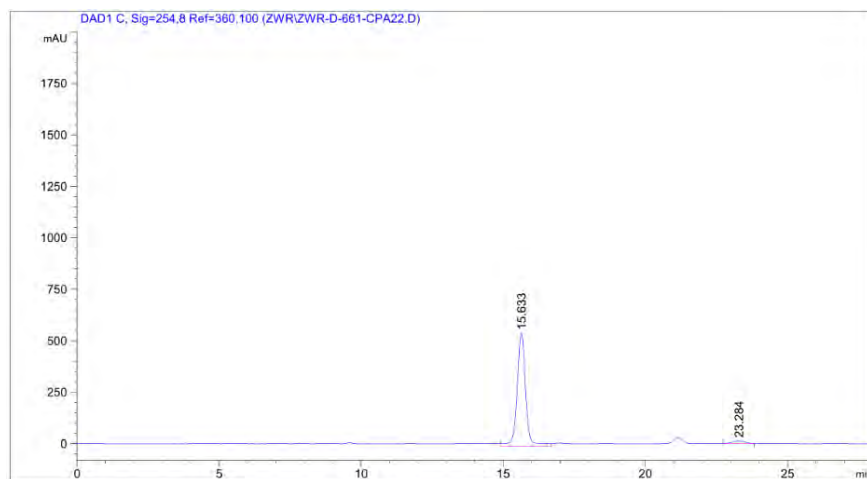

信号 1: DAD1 C, Sig=254,8 Ref=360,100

| 峰 # | 保留时间 [min] | 类型   | 峰宽 [min] | 峰面积 [mAU*s] | 峰高 [mAU]  | 峰面积 %   |
|-----|------------|------|----------|-------------|-----------|---------|
| 1   | 15.633     | MM R | 0.3523   | 1.16176e4   | 549.59070 | 96.9672 |
| 2   | 23.284     | MM R | 0.4888   | 363.35400   | 12.38835  | 3.0328  |

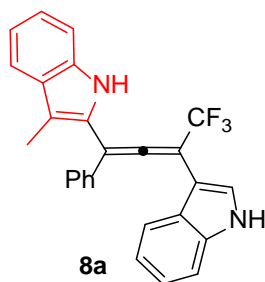

### HPLC spectrum of the racemate

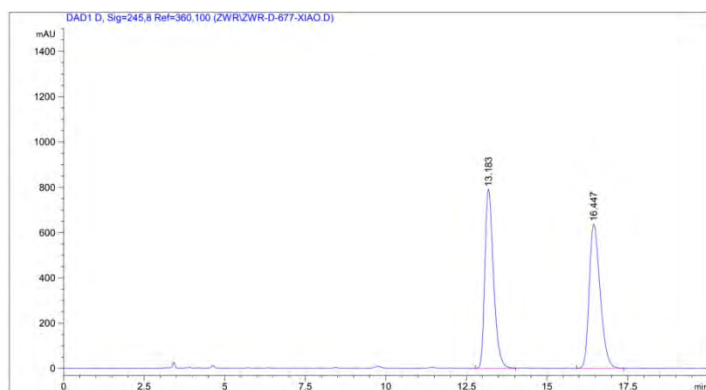

信号 1: DAD1 D, Sig=245,8 Ref=360,100

| 峰 # | 保留时间 [min] | 类型 | 峰宽 [min] | 峰面积 [mAU*s] | 峰高 [mAU]  | 峰面积 %   |
|-----|------------|----|----------|-------------|-----------|---------|
| 1   | 13.183     | BB | 0.2884   | 1.48045e4   | 790.70453 | 49.6985 |
| 2   | 16.447     | BB | 0.3607   | 1.49841e4   | 636.34796 | 50.3015 |

### HPLC spectrum of the enantioenriched compound

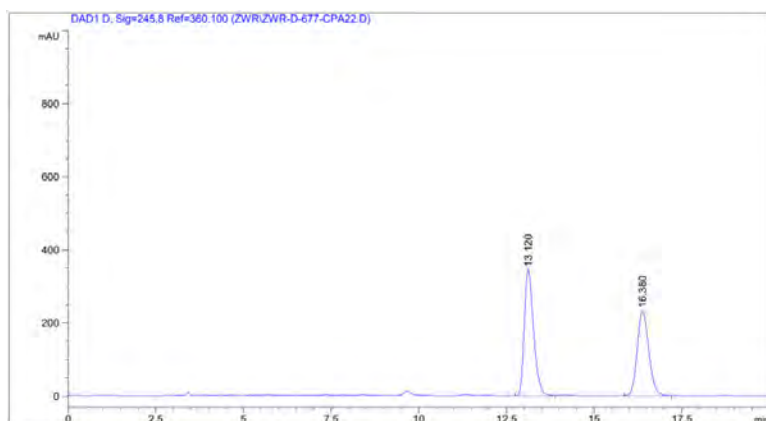

信号 1: DAD1 D, Sig=245,8 Ref=360,100

| 峰 # | 保留时间 [min] | 类型 | 峰宽 [min] | 峰面积 [mAU*s] | 峰高 [mAU]  | 峰面积 %   |
|-----|------------|----|----------|-------------|-----------|---------|
| 1   | 13.120     | BB | 0.2833   | 6390.04883  | 346.23212 | 54.4103 |
| 2   | 16.380     | BB | 0.3532   | 5354.13965  | 233.80940 | 45.5897 |



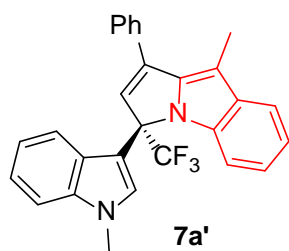

### HPLC spectrum of the racemate

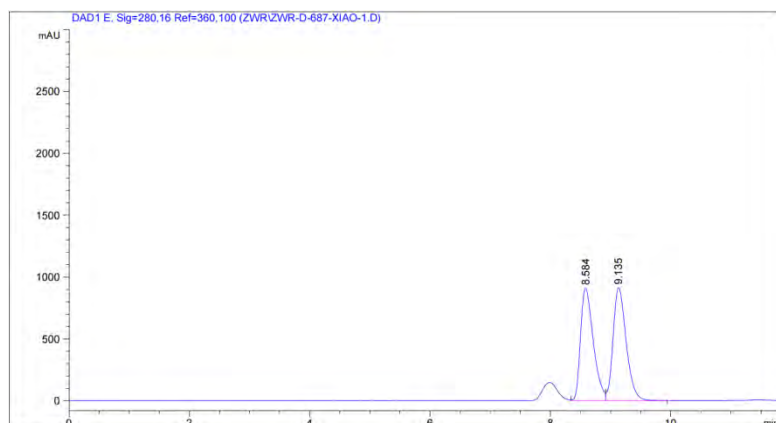

信号 1: DAD1 E, Sig=280,16 Ref=360,100

| 峰 # | 保留时间 [min] | 类型 | 峰宽 [min] | 峰面积 [mAU*s] | 峰高 [mAU]  | 峰面积 %   |
|-----|------------|----|----------|-------------|-----------|---------|
| 1   | 8.584      | VV | 0.2258   | 1.33933e4   | 909.75916 | 49.1170 |
| 2   | 9.135      | VB | 0.2331   | 1.38749e4   | 914.09125 | 50.8830 |

### HPLC spectrum of the enantioenriched compound

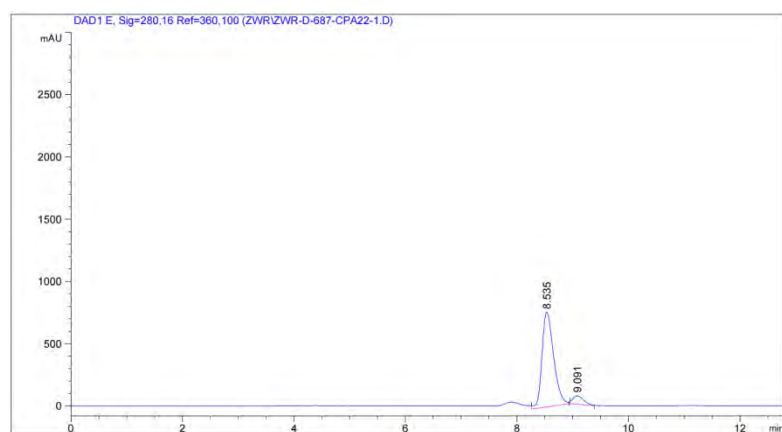

信号 1: DAD1 E, Sig=280,16 Ref=360,100

| 峰 # | 保留时间 [min] | 类型   | 峰宽 [min] | 峰面积 [mAU*s] | 峰高 [mAU]  | 峰面积 %   |
|-----|------------|------|----------|-------------|-----------|---------|
| 1   | 8.535      | MM R | 0.2421   | 1.10765e4   | 762.63831 | 92.3949 |
| 2   | 9.091      | MM R | 0.2234   | 911.71942   | 68.02589  | 7.6051  |
